# Supplementary material for: Transcriptome and structure analysis in root of Casuarina equisetifolia under NaCl treatment
Source: PeerJ. 2021 Sep 22;9:e12133. doi: 10.7717/peerj.12133 (PMC8464194; doi:10.7717/peerj.12133)
Supplement: Supplemental Information 3 [file peerj-09-12133-s003.xlsx]

## Sheet: Sheet2
Table S1. Primers used for qRT-PCR of genes in C. equisetifolia
Genes	Orientation	Primers used in qRT-PCR(5′→3′)
CCG016745	Forwards	CGCTTGCCCTTTTCGTGT
	Reverse	CTCGCAGACTCTTGCCTCAG
CCG015501	Forwards	CTGGGGCTCACATTTGGC
	Reverse	GCTTGGCATCGCAGGAGT
CCG010583	Forwards	GCGTCTGATGGGAGCGTC
	Reverse	GGTGCATTGGAGCAGGTGA
CCG013802	Forwards	TAGAACCTATTGCTCCACCGAC
	Reverse	TTGATTTCCACCAAAGACGC
