# Supplementary material for: Transcriptome and structure analysis in root of Casuarina equisetifolia under NaCl treatment
Source: PeerJ. 2021 Sep 22;9:e12133. doi: 10.7717/peerj.12133 (PMC8464194; doi:10.7717/peerj.12133)
Supplement: Supplemental Information 4 [file peerj-09-12133-s004.xlsx]

## Sheet: Sheet1
Table S2. Mapping rate of clean reads to reference genome
Sample	clean reads	Mapped unique reads	Mapping ratio
Control-rep1	94889166	71489667	0.7944
Control-rep2	83207678	63708484	0.8062
1h-rep1	80,628,372‬	62145865	0.8102
1h-rep2	71177886	54,623,221‬	0.8052
6h-rep1	75,974,542‬	58315339	0.8105
6h-rep2	68520708	52791507	0.812
24h-rep1	84099384	62,104,568‬	0.8002
24h-rep2	83,400,464‬	55,062,591‬	0.7919
168h-rep1	74983028	53,794,672‬	0.7706
168h-rep2	84775120	61342603	0.7786
Total	561652970	369793465
