# Supplementary material for: Transcriptome and structure analysis in root of Casuarina equisetifolia under NaCl treatment
Source: PeerJ. 2021 Sep 22;9:e12133. doi: 10.7717/peerj.12133 (PMC8464194; doi:10.7717/peerj.12133)
Supplement: Supplemental Information 5 — The total differentially expressed genes in Table S3 −1. The DEGs of 1, 6, 24, and 168 h vs control are detailed in Table S3 −2 to Table S3 −5. The DEGs of different salt treatment are detailed in Table S3 −6 to Table S3 −11. [file peerj-09-12133-s005.xlsx]

## Sheet: Table S3-1
Table S3-1. The total differentially expressed genes (DEGs)
ID	Description	Hour1	Hour6	Hour24	Hour168
CCG000005	tonoplast dicarboxylate transporter-like	-0.505502	6.00936	3.99065	1.68392
CCG000006	cysteine ase inhibitor 1-like	-0.396763	2.51918	1.19445	1.91428
CCG000008	cysteine ase inhibitor 5-like	-0.0305333	1.07405	-0.0998747	-2.41853
CCG000009	cysteine ase inhibitor 1-like	0.755312	2.79784	2.94861	1.89236
CCG000012	inositol monophosphatase 3	0.161061	-0.851116	-1.78472	-1.52454
CCG000015	U-box domain-containing 4	1.35621	0.105725	0.113595	-0.799471
CCG000019	inositol transporter 4-like [Fragaria vesca vesca]	3.58166	3.51562	1.41393	2.07931
CCG000031	scarecrow 13	1.26824	1.5158	1.51884	1.18249
CCG000035	calcium-transporting ATPase plasma membrane-type-like	-1.34929	-5.93772	-5.97106	-6.03372
CCG000038	UDP-glucuronate 4-epimerase 6	0.657042	-1.67273	-2.02252	-2.20153
CCG000039	Glycine-rich RNA-binding mitochondrial	-0.0332509	-1.16521	-2.40316	-0.259238
CCG000042	chaperone dnaJ chloroplastic-like	0.0451153	0.634967	1.32641	0.503324
CCG000043	---NA---	6.27593	2.70632	1.10768	3.10904
CCG000050	aspartate-semialdehyde dehydrogenase	-0.224771	1.04961	-0.231328	-1.16637
CCG000051	DNA gyrase subunit chloroplastic mitochondrial	0.290584	0.0245126	-1.48649	0.276723
CCG000059	probable sucrose-phosphate synthase 3	-0.466093	-1.93322	-3.2598	-1.02766
CCG000062	Histidine [Theobroma cacao]	0.0196486	-0.134174	-0.511649	1.11059
CCG000065	hydroxyproline-rich glyco [Populus trichocarpa]	2.66889	3.80796	4.26971	4.23708
CCG000067	elongation factor 1- [Ricinus communis]	0.00251906	-0.523214	-1.0065	-0.41134
CCG000071	paired amphipathic helix Sin3-like 6 [Arabidopsis thaliana]	3.73414	1.03361	1.29749	2.51001
CCG000081	Cinnamyl-alcohol dehydrogenase isoform 1 [Theobroma cacao]	-1.07673	2.46895	1.61418	0.724251
CCG000082	receptor kinase 1	1.35789	1.70681	2.10288	1.92276
CCG000083	receptor kinase 1	2.17061	2.18238	1.78616	2.30318
CCG000084	Os07g0160300 [Oryza sativa Japonica Group]	-0.044414	2.57942	3.56453	1.02547
CCG000085	2-hydroxyisoflavanone dehydratase-like	-0.551695	-2.27743	-3.91153	-1.86696
CCG000086	Os07g0160300 [Oryza sativa Japonica Group]	0.0451158	3.10568	3.84961	1.05163
CCG000087	probable carboxylesterase 12	-1.82563	-1.08202	-2.39466	-2.02009
CCG000088	2-hydroxyisoflavanone dehydratase-like	-1.58993	-4.80945	-5.52212	-4.36572
CCG000090	probable carboxylesterase 2	-0.969925	-1.97986	-1.00811	-0.288478
CCG000094	probable carboxylesterase 12	-1.30562	-4.70605	-4.40701	-4.20943
CCG000096	probable carboxylesterase 2 [Eucalyptus grandis]	-1.37288	-3.49713	-3.82897	-3.35133
CCG000097	probable carboxylesterase 12	-0.545055	4.09501	4.60618	4.3735
CCG000099	Nodulation H [Morus notabilis]	2.68273	1.84665	0.882168	1.14281
CCG000101	Calmodulin-binding family [Populus trichocarpa]	1.39656	2.53285	3.24761	2.9907
CCG000102	C2H2 and C2HC zinc fingers superfamily [Theobroma cacao]	0.355117	0.79391	1.01773	0.479021
CCG000107	CUB and sushi domain-containing 3 [Theobroma cacao]	0.601494	5.44465	7.62337	8.45855
CCG000108	plastocyanin-like domain [Medicago truncatula]	-2.11973	3.96768	7.60545	8.09507
CCG000111	CUB and sushi domain-containing 3 [Theobroma cacao]	4.10874	4.82052	8.04412	8.98862
CCG000112	probable carboxylesterase 12	0.269305	-1.0063	-1.95745	-1.33129
CCG000113	CUB and sushi domain-containing 3 [Theobroma cacao]	3.70805	5.68568	8.17884	9.83672
CCG000117	CUB and sushi domain-containing 3 [Theobroma cacao]	1.68139	5.65917	7.16789	9.93269
CCG000118	CUB and sushi domain-containing 3 [Theobroma cacao]	0.221324	4.14546	5.65412	8.09374
CCG000123	Uncharacterized protein TCM_007002 [Theobroma cacao]	-1.27554	-2.00667	-0.826209	-1.3574
CCG000124	peroxidase 10	-1.92462	-0.473228	1.80565	-1.02253
CCG000125	peroxidase 10-like	-2.15242	-5.51014	-3.6235	-4.67766
CCG000129	la-related 6C	0.718296	3.50826	5.37217	0.921824
CCG000130	Two-component response regulator [Morus notabilis]	1.08947	0.763509	1.12631	1.41786
CCG000137	F-box LRR-repeat At4g14103-like	1.87054	-0.12725	0.588353	2.37441
CCG000138	exocyst complex component EXO70A1	0.590339	0.757067	1.41182	1.38322
CCG000145	GCK domain-containing [Theobroma cacao]	-0.156382	-0.541289	-1.09039	0.546574
CCG000147	probable LRR receptor-like serine threonine- kinase At4g29180	3.67658	-0.0457034	2.97159	4.96553
CCG000151	lisH domain-containing -like isoform X2	-0.144141	0.910126	1.20687	0.328639
CCG000153	fasciclin-like arabinogalactan 13	-0.809794	-1.35251	-2.54775	-4.87263
CCG000154	Proteophosphoglycan- [Theobroma cacao]	-0.0384501	1.25726	1.31382	0.637152
CCG000156	trans-resveratrol di-O-methyltransferase-like	-1.29896	-2.50062	-3.62577	-2.68293
CCG000159	F-box and associated interaction domains-containing isoform 1 [Theobroma cacao]	-0.965786	-2.81993	-2.97257	-4.49759
CCG000164	F-box and associated interaction domains-containing isoform 1 [Theobroma cacao]	1.28165	4.8539	6.02994	5.25527
CCG000165	F-box and associated interaction domains-containing isoform 1 [Theobroma cacao]	1.94481	4.79499	7.21162	6.01361
CCG000167	F-box At3g07870-like	1.28823	2.03031	1.41039	1.96165
CCG000169	acyl-coenzyme A oxidase peroxisomal-like	0.0689725	2.14699	2.9566	1.84726
CCG000170	RAB GTPase A1F [Theobroma cacao]	0.344544	1.55542	2.05041	2.67649
CCG000171	translation factor GUF1 organellar chromatophore	-0.0329173	-0.40748	-1.2113	0.0697881
CCG000172	rac-like GTP-binding RAC2	-0.146755	-1.5485	-2.83271	-2.61517
CCG000174	pentatricopeptide repeat-containing At1g06270	1.08837	-0.213952	-0.837035	0.103762
CCG000176	basic leucine zipper 61-like	-0.245108	-0.0397284	-1.15657	-2.00227
CCG000177	chaperone 1	-0.149432	1.72239	1.30521	0.782463
CCG000183	glutamate receptor -like	0.581809	-4.95745	-4.98399	-6.48444
CCG000188	xylosyltransferase 1	0.015428	-0.699894	-1.0819	-0.490605
CCG000190	HIPL1 [Ricinus communis]	-0.998049	-1.89492	-0.90078	-1.18957
CCG000192	pentatricopeptide repeat-containing At3g28640	-0.481359	-0.59735	-1.59276	-0.26764
CCG000193	[Ricinus communis]	-0.624297	-1.52881	-1.32396	-0.60811
CCG000195	ATPase plasma membrane-type-like	-0.0281127	2.12812	2.05746	2.05455
CCG000198	NADH dehydrogenase [ubiquinone] complex assembly factor 7	0.171316	-0.6265	-1.48028	-0.461524
CCG000199	hypothetical protein POPTR_0017s11350g [Populus trichocarpa]	1.80046	1.53197	1.58369	0.201806
CCG000203	hypersensitive-induced response 2-like [Glycine max]	-0.224977	0.286849	1.20148	0.169259
CCG000204	SPFH Band 7 PHB domain-containing membrane-associated family isoform 1 [Theobroma cacao]	-0.303078	0.0916189	1.11079	-0.680169
CCG000205	mitochondrial outer membrane porin of 34 kDa	-0.0257072	-0.569283	-1.61299	-0.856269
CCG000207	pectate lyase-like	4.54839	3.01091	3.47855	6.65447
CCG000209	AP2-like ethylene-responsive transcription factor At1g79700	-0.970387	-2.46975	-2.8199	-1.75239
CCG000211	TAF5-like RNA polymerase II p300 CBP-associated factor-associated factor 65 kDa subunit 5L [Morus notabilis]	-0.169725	1.17024	1.27456	0.651932
CCG000214	2-aminoethanethiol dioxygenase-like [Malus domestica]	-1.36688	0.485329	1.23082	0.562943
CCG000215	serine carboxypeptidase-like 45 isoform X2	6.40853	7.11467	6.56484	7.06197
CCG000216	WRKY DNA-binding [Theobroma cacao]	0.260695	0.960941	1.66191	0.459967
CCG000218	dihydroflavonol 4-reductase	-1.07137	-1.51047	-0.776594	-0.389226
CCG000219	aldose 1-epimerase	-0.16089	-0.868713	-2.34075	-2.53331
CCG000221	probable receptor kinase At5g15080	-0.200827	-1.34069	-1.85856	-0.42188
CCG000222	Homeobox 20 [Theobroma cacao]	-0.966066	-4.03993	-6.11228	-5.55987
CCG000223	Glutaredoxin family [Theobroma cacao]	0.765204	0.0793642	-0.294013	1.03902
CCG000224	RNA-binding region RNP-1 (RNA recognition motif) isoform 1 [Theobroma cacao]	-0.635035	-1.43493	-0.437143	-0.358798
CCG000225	Transcription factor bHLH135 [Glycine soja]	0.263755	-0.205365	-2.92211	-0.826892
CCG000226	conserved hypothetical protein [Ricinus communis]	-0.139183	-0.372731	-1.00771	-1.76055
CCG000229	12-oxophytodienoate reductase 11	NA	9.11353	5.71628	1.92661
CCG000230	12-oxophytodienoate reductase 11	-1.36195	5.95163	4.8072	3.83864
CCG000232	12-oxophytodienoate reductase 11	3.36004	4.82704	4.44279	6.07407
CCG000233	12-oxophytodienoate reductase 11	1.14827	3.64903	3.37657	4.23987
CCG000234	12-oxophytodienoate reductase 11	0.614459	4.00983	2.07033	4.78704
CCG000235	agamous-like MADS-box AGL12	-0.052544	-0.787425	-3.28972	-2.97435
CCG000241	glucuronoxylan 4-O-methyltransferase 3-like	-1.33177	-3.15503	-4.60877	-3.62956
CCG000242	queuine tRNA-ribosyltransferase subunit qtrtd1-like	-0.98183	-1.92728	-1.46338	-0.978594
CCG000243	Thioredoxin family isoform 1 [Theobroma cacao]	-0.381072	-1.24661	-0.458689	-0.950733
CCG000245	electron [Ricinus communis]	0.215823	0.588678	1.06669	0.595042
CCG000246	probable serine threonine- kinase At1g09600	-0.653431	-0.458242	-2.52824	-1.58754
CCG000247	11-beta-hydroxysteroid dehydrogenase-like 5	NA	7.41328	7.33369	3.41533
CCG000248	ethylene-responsive transcription factor ERF019-like	5.24797	2.65262	3.54631	2.49655
CCG000249	Rieske [2Fe-2S] [Oryza sativa Japonica Group]	-0.153756	-0.618629	-1.17829	-1.38215
CCG000258	ethylene-responsive transcription factor ERF021-like	5.71566	3.86221	1.34472	1.36064
CCG000261	proteoglycan 4-like isoform X1 [Vitis vinifera]	0.465911	-1.50279	-1.03449	-0.553487
CCG000267	non-lysosomal glucosylceramidase [Vitis vinifera]	-0.363407	-2.03116	-2.28666	-1.10849
CCG000276	probable phosphatase 2C 2	1.07999	2.88248	2.55863	2.48532
CCG000279	Actin-binding LIM [Theobroma cacao]	0.250518	0.769116	1.62789	0.3082
CCG000281	molybdopterin synthase sulfur carrier subunit	1.0587	0.559628	1.05092	-0.133555
CCG000282	probably inactive leucine-rich repeat receptor kinase At2g25790	2.3335	1.87938	2.02275	2.17897
CCG000285	endoglucanase 9	0.10031	0.840066	0.428657	-1.24179
CCG000289	endo-1,3(4)-beta-glucanase 2	0.329939	3.72252	3.8712	4.31655
CCG000292	probable carboxylesterase 18	0.1435	1.07529	1.28738	2.77997
CCG000293	probable carboxylesterase 18-like	-1.41413	-0.803323	-0.142742	-0.264076
CCG000294	probable sucrose-phosphate synthase 4	-0.411338	-1.02027	-3.09701	-1.79018
CCG000296	RING-H2 finger ATL7-like	-0.492873	-0.461545	-0.575218	-1.74983
CCG000299	single-stranded DNA-bindig mitochondrial	0.0557122	-0.637921	-1.14432	-0.53131
CCG000306	NRT1 PTR FAMILY -like	0.649385	-0.719066	-2.33653	-1.20885
CCG000312	zeaxanthin chloroplastic-like isoform X1	-0.204951	1.64003	1.32964	-0.0975893
CCG000313	zeaxanthin chloroplastic-like	3.13033	7.76834	7.69825	8.5116
CCG000320	membrin-11-like [Eucalyptus grandis]	0.435001	1.34263	1.26818	0.955914
CCG000322	probable fructokinase-5	5.68102	4.14648	4.6488	5.00244
CCG000323	enzyme of the cupin superfamily [Zea mays]	0.00898494	-0.992605	-2.75477	-1.49525
CCG000329	no apical meristem family [Populus trichocarpa]	-0.565079	-0.520271	-0.758975	-1.54456
CCG000331	NAC transcription factor 29-like	-0.659112	1.00505	1.54299	-1.02345
CCG000333	E3 ubiquitin- ligase MBR1 [Jatropha curcas]	0.581469	1.70672	1.6653	1.16159
CCG000334	polyubiquitin 4-like	1.7874	2.14941	1.81456	2.76697
CCG000335	DEAD-box ATP-dependent RNA helicase 21-like [Populus euphratica]	0.0924839	0.526995	0.474755	1.14905
CCG000337	MLO 3	1.93822	4.13502	4.01669	5.13368
CCG000338	unnamed protein product	0.189268	2.18259	3.45059	2.69722
CCG000339	peroxidase 21	-0.489048	1.21165	2.39037	0.734009
CCG000340	L-type lectin-domain containing receptor kinase -like	-1.12159	-1.2422	-1.68907	-1.84405
CCG000342	cell number regulator 8-like	0.742622	1.04514	1.05934	0.558067
CCG000345	chromo domain-containing cec-1	-0.16628	-2.18034	-1.30484	-1.02783
CCG000346	POLAR LOCALIZATION DURING ASYMMETRIC DIVISION AND REDISTRIBUTION [Pyrus x bretschneideri]	-0.246056	-0.338727	-2.23681	-3.05156
CCG000351	secondary cell wall-related glycosyltransferase family 43	-0.903725	-2.45483	-4.87465	-5.47173
CCG000352	IQ-DOMAIN 1-like	-0.490266	-1.80827	-2.11753	-1.97823
CCG000355	CDT1 chloroplastic	-1.14605	-3.69888	-3.98031	-2.17719
CCG000365	ethylene receptor 2	-1.273	1.06492	0.931599	0.26504
CCG000368	plant T32M21-140	1.50215	1.25873	1.32383	1.04158
CCG000369	hypothetical protein VITISV_033484	-0.0794813	0.373462	1.36032	0.728967
CCG000370	enoyl- hydratase isomerase family [Arabidopsis lyrata lyrata]	-0.0932704	0.67703	1.04651	-0.10188
CCG000373	HR-like lesion-inducing -related isoform 1 [Theobroma cacao]	-0.297829	-0.686427	-1.0569	-0.538697
CCG000374	2-oxoglutarate (2OG) and Fe(II)-dependent oxygenase superfamily [Theobroma cacao]	-2.1096	-3.94423	-3.58084	-4.53566
CCG000375	2-oxoglutarate (2OG) and Fe(II)-dependent oxygenase superfamily [Theobroma cacao]	-1.47056	-5.27632	-3.08509	-2.78087
CCG000376	1-aminocyclopropane-1-carboxylate oxidase homolog 1-like	-0.353986	-1.85658	-2.13679	-1.81138
CCG000377	1-aminocyclopropane-1-carboxylate oxidase homolog 1-like	-0.306717	-0.740142	-1.54335	-0.886856
CCG000378	WAT1-related At5g07050-like	-0.377053	-0.756859	-0.893652	-1.45496
CCG000380	transcription factor bHLH104-like	0.329172	1.002	0.639135	1.10086
CCG000381	electron transfer flavo subunit mitochondrial	0.213588	1.82692	1.76715	0.897921
CCG000382	RING-H2 finger ATL16-like	1.60455	0.535586	-0.859836	0.159514
CCG000383	ethylene-responsive transcription factor ERF098-like	0.290146	3.99146	4.55343	6.17076
CCG000384	ethylene-responsive transcription factor ERF098-like	0.263901	5.32826	4.6422	5.28368
CCG000385	ethylene-responsive transcription factor 1B-like	3.42266	4.00161	4.56247	5.10463
CCG000386	AT5g43400 MWF20_9 [Arabidopsis thaliana]	1.10929	3.29811	4.10187	3.88355
CCG000389	---NA---	-0.484915	-1.76306	-0.958711	-0.305279
CCG000390	early nodulin-75-like	0.910654	1.52521	1.32166	0.138732
CCG000391	early nodulin-75-like	0.996795	2.71424	3.4064	1.76436
CCG000392	early nodulin-75-like	0.753812	1.25082	1.3664	0.175921
CCG000393	---NA---	-0.349619	-0.787358	1.17625	0.556093
CCG000394	early nodulin-75-like	-0.188234	1.838	3.38906	3.42579
CCG000396	14 kDa proline-rich -like	-1.40594	-3.54151	-4.6987	-6.58878
CCG000397	14 kDa proline-rich -like	-1.54762	-2.96053	-2.92672	-4.94807
CCG000398	14 kDa proline-rich -like	-1.23576	-3.44535	-5.62312	-7.32968
CCG000399	14 kDa proline-rich -like	-0.254398	0.543816	1.16223	-1.26462
CCG000400	kDa proline-rich -like	-0.22105	-1.9452	-2.29511	-2.73824
CCG000401	14 kDa proline-rich [Theobroma cacao]	-0.232431	-2.29946	-5.59848	-6.48217
CCG000402	14 kDa proline-rich [Theobroma cacao]	-0.149378	-2.30815	-7.0615	-9.46898
CCG000403	14 kDa proline-rich [Theobroma cacao]	-0.0951974	-1.84075	-6.42911	-9.11189
CCG000404	nitrate transporter family [Populus trichocarpa]	-0.591283	-1.88028	-1.86677	-1.61053
CCG000405	---NA---	7.08265	4.26473	3.53074	NA
CCG000406	OSBP(oxysterol binding )-related 2A isoform 4 [Theobroma cacao]	-0.11137	-1.03077	-2.03273	-2.05448
CCG000409	probable WRKY transcription factor 7	-1.89545	0.471448	1.97949	-2.285
CCG000410	PREDICTED: uncharacterized protein LOC105132262 isoform X1 [Populus euphratica]	-1.01191	-0.756773	0.340957	-0.539155
CCG000418	3-oxoacyl-[acyl-carrier- ] synthase 3 B [Morus notabilis]	-1.27685	-1.00461	-1.14571	-0.176105
CCG000420	xyloglucan galactosyltransferase KATAMARI1 homolog	-0.548023	-1.14354	-1.92513	-1.2772
CCG000423	vinorine synthase-like	3.66883	5.24111	6.44906	4.62906
CCG000424	DC1 domain-containing family [Populus trichocarpa]	-0.708183	0.366498	1.33037	1.00527
CCG000425	rae1 At1g80670 [Nelumbo nucifera]	-0.33505	-0.747049	-1.55735	-1.35489
CCG000426	probable transaldolase	0.0642935	-0.379614	-1.20158	-1.28819
CCG000427	diaminopimelate decarboxylase chloroplastic-like	0.0387689	-0.280849	-1.21201	-0.371911
CCG000429	acid beta-fructofuranosidase	-0.176604	-2.12645	-3.03859	-1.03604
CCG000431	monocopper oxidase SKU5	-0.0767961	-2.16679	-4.31026	-3.4673
CCG000443	Ankyrin repeat-containing [Theobroma cacao]	-0.656896	-1.60863	-0.594504	-3.01056
CCG000449	Arogenate dehydrogenase [Theobroma cacao]	3.51803	0.367502	-0.5516	-1.16498
CCG000451	probable LRR receptor-like serine threonine- kinase At4g36180	-0.0292893	1.44549	3.16605	2.74826
CCG000452	phosphoenolpyruvate carboxylase family [Populus trichocarpa]	-0.0218694	-0.568313	-1.02842	0.732082
CCG000454	UDP-N-acetylglucosamine 1-carboxyvinyltransferase isoform 2 [Theobroma cacao]	0.255654	-0.56599	-4.26091	-2.18963
CCG000456	TPR repeat-containing thioredoxin TTL1	-0.331327	-1.43111	-3.78896	-2.72744
CCG000457	galactosyltransferase family [Populus trichocarpa]	-0.196535	-0.538128	-1.22901	-0.411314
CCG000458	Chromodomain-helicase-DNA-binding 4 [Morus notabilis]	-0.182591	-0.962015	-1.50656	-0.509718
CCG000460	serine threonine- kinase [Solanum lycopersicum]	1.28396	1.70223	1.59105	1.89535
CCG000461	ABC transporter G family member 10-like	-0.0297394	1.15529	1.79161	1.79785
CCG000462	PREDICTED: uncharacterized protein At3g15000, mitochondrial-like	-0.121438	-0.716984	-1.01429	0.436915
CCG000467	B-cell lymphoma 6 [Theobroma cacao]	-0.852069	1.63877	2.98317	1.80063
CCG000470	transport Sec61 subunit alpha-like [Populus euphratica]	1.07131	0.581291	0.115801	0.848149
CCG000471	NHL domain-containing isoform 2 [Theobroma cacao]	-0.172813	-0.918716	-1.11365	-0.688619
CCG000474	trichome birefringence-like 41	-0.401542	-1.90735	-5.23976	-8.007
CCG000475	trichome birefringence-like 41	0.0537977	-1.91596	-5.75216	-8.13686
CCG000476	probable leucine-rich repeat receptor-like serine threonine- kinase At3g14840	0.0677092	1.81204	2.60032	0.719621
CCG000478	Epstein-Barr nuclear antigen 2 [Theobroma cacao]	0.00566587	0.971786	1.15965	0.204513
CCG000484	---NA---	0.436898	-0.493958	-2.75725	0.446433
CCG000485	Craniofacial development isoform 1 [Theobroma cacao]	0.0267903	-1.23669	-2.55302	-0.0142355
CCG000487	probable rhamnose biosynthetic enzyme 1-like isoform X1 [Glycine max]	1.12386	0.217648	-0.345137	0.282229
CCG000490	hypothetical protein CICLE_v10029648mg [Citrus clementina]	-0.31376	-0.833554	-1.28465	-0.799403
CCG000507	DNA-directed RNA polymerase II subunit RPB1-like	-2.16115	-4.71871	-7.79694	0.353994
CCG000508	DNA-directed RNA polymerase II subunit RPB1-like	-1.28179	-4.62116	-7.11482	-1.32346
CCG000510	patatin 1	0.118989	2.03097	1.98569	1.71158
CCG000511	PREDICTED: uncharacterized protein LOC105639686 [Jatropha curcas]	0.325233	1.14792	1.19927	0.991075
CCG000513	Cyclin-dependent kinase inhibitor 7	-0.642847	-0.903228	-0.339237	-1.06685
CCG000515	B3 domain-containing Os01g0234100-like isoform X1	-0.0186408	-2.26483	-4.8653	-3.08083
CCG000516	membrane-associated kinase regulator 1	-1.6814	-3.11478	-5.86327	-2.82254
CCG000517	---NA---	-0.777845	-1.98222	-1.2845	-5.22348
CCG000518	Calcium-binding EF-hand family [Theobroma cacao]	-0.804075	-1.48411	-0.97187	-2.66725
CCG000524	red chlorophyll catabolite chloroplastic-like	0.195196	1.31668	1.2362	1.78114
CCG000526	Membrane insertase	-1.06653	-0.528472	0.0415289	-0.13933
CCG000528	PREDICTED: uncharacterized protein LOC100262755	-0.0300845	-1.87157	-1.88927	-1.22135
CCG000529	zeaxanthin chloroplastic-like	1.56887	0.870978	0.193696	0.302508
CCG000531	DAZ-associated 1 [Fragaria vesca vesca]	0.381143	0.693615	1.01433	0.59197
CCG000532	Alpha beta-Hydrolases superfamily [Theobroma cacao]	4.1412	4.44916	4.22297	5.09027
CCG000533	triacylglycerol [Ricinus communis]	4.29663	4.54345	4.20039	5.37941
CCG000537	ankyrin repeat-containing At5g02620-like	1.16997	3.21282	1.3348	-3.15183
CCG000544	Anhydro-N-acetylmuramic acid kinase	1.02488	0.113325	-3.28153	-2.79864
CCG000547	fructokinase-5-like isoform X1	0.373374	1.83195	1.62355	2.25104
CCG000549	chloroplastic isoform X2	-0.0107892	-0.78487	-2.0149	-1.0293
CCG000550	chloroplastic [Sesamum indicum]	-0.0929719	-1.07874	-2.04287	-1.39839
CCG000551	gibberellin 20 oxidase 1	-2.06768	-2.31246	-3.73509	-5.83059
CCG000577	serine-threonine plant- [Ricinus communis]	2.19007	-2.43689	-3.2868	-3.06222
CCG000591	NBS type disease resistance [Theobroma cacao]	-0.541867	-1.27136	-0.58899	-1.13245
CCG000594	glutamate receptor -like	6.15611	3.33878	1.88651	3.09285
CCG000597	probable leucine-rich repeat receptor kinase At1g35710	-1.179	-1.38072	-0.930418	-2.15796
CCG000608	shikimate O-hydroxycinnamoyltransferase	-1.59184	-0.794089	-1.4512	-1.49321
CCG000613	TMV resistance N-like	-0.491508	-0.138147	0.271239	-1.00058
CCG000615	TMV resistance N-like	-0.729626	-1.71355	-0.781682	-0.673151
CCG000638	BAHD acyltransferase At5g47980-like	-4.05826	-2.91582	-2.45283	-3.26898
CCG000639	BAHD acyltransferase At5g47980-like	-2.45812	-4.53786	-3.38583	-3.70204
CCG000643	F-box SKIP14	0.431055	0.601744	0.690095	1.07805
CCG000647	ABC transporter C family member 15	-1.38349	-0.294041	3.07423	3.06486
CCG000650	Multidrug resistance ABC transporter family isoform 1 [Theobroma cacao]	-0.728939	2.16408	2.66243	-0.0213532
CCG000652	Glyceraldehyde-3-phosphate dehydrogenase	-0.0633494	0.3497	-0.188055	-1.55781
CCG000653	pentatricopeptide repeat-containing mitochondrial-like [Pyrus x bretschneideri]	1.40627	1.56498	1.1513	-0.298502
CCG000654	ankyrin repeat and sterile alpha motif domain-containing 1B-like	-0.710369	0.995321	-0.409052	-2.5299
CCG000659	scarecrow 14	0.246601	3.15493	3.85077	4.36028
CCG000662	scarecrow 14	2.76315	1.36992	1.59001	2.18923
CCG000663	ubiquitin fusion degradation 1 homolog	3.25732	-0.840886	0.445635	1.60582
CCG000664	Haloacid dehalogenase-like hydrolase superfamily [Theobroma cacao]	4.48101	3.10358	1.62703	2.65423
CCG000665	[Ricinus communis]	1.88118	1.93001	0.532783	2.00175
CCG000670	C-terminal S-isoprenylcysteine carboxyl O-methyltransferases [Theobroma cacao]	-0.326697	-0.692493	-1.62702	0.277437
CCG000671	abscisic acid 8 -hydroxylase 2	1.75995	7.62653	5.95981	3.47669
CCG000672	---NA---	5.77256	9.65865	7.64549	6.319
CCG000675	Laccase-2 [Glycine soja]	0.0648211	-0.7511	-6.39514	-11.069
CCG000679	zinc transporter 2	2.25363	2.37351	1.33598	1.82552
CCG000683	zinc transporter 2	-0.665554	-2.7022	-2.13651	-3.13181
CCG000684	Binding isoform 1 [Theobroma cacao]	0.811826	2.38332	1.64944	1.79869
CCG000685	E3 ubiquitin- ligase RING1-like	0.966155	0.799278	0.806151	1.13897
CCG000690	PREDICTED: uncharacterized protein LOC103322096	-0.337781	0.999754	1.57544	-0.359455
CCG000693	receptor 12	0.447772	-1.53995	-1.64617	-0.889472
CCG000717	REF SRPP At3g05500	0.453085	1.05585	1.20195	0.635478
CCG000718	RALF-like 33	0.0539763	-0.681179	-1.31955	-1.28898
CCG000719	Cell cycle checkpoint control RAD9A	-0.276631	-1.47198	-2.46835	-0.990538
CCG000720	Heavy metal transport detoxification superfamily [Theobroma cacao]	-0.210722	-0.774358	-1.57754	-0.365878
CCG000721	respiratory burst oxidase homolog B-like	-1.02409	1.56019	1.95827	0.565999
CCG000723	Heat shock 70 (Hsp 70) family [Theobroma cacao]	2.23184	3.04576	3.12904	3.6612
CCG000724	ATP-dependent DNA helicase Q-like SIM isoform X1	0.0207421	-0.276484	-1.0817	0.190749
CCG000726	histone -like	0.050654	0.920529	0.0302818	-2.07677
CCG000728	src2 [Glycine max]	1.84629	0.330642	0.255742	0.468973
CCG000732	zinc finger NUTCRACKER-like	-1.2128	-0.578719	-0.0931557	-1.12537
CCG000733	hypothetical protein PRUPE_ppa000991mg [Prunus persica]	-0.2794	0.0240982	-1.12856	-0.544461
CCG000734	[Theobroma cacao]	-0.17897	-0.447543	-1.09517	-0.254338
CCG000737	plastid CUL1	-0.322603	-1.11815	-1.30564	0.163092
CCG000742	DNA polymerase zeta catalytic subunit	-0.0665461	-1.06581	-1.32403	0.672435
CCG000744	DNA polymerase zeta catalytic subunit	0.337636	0.295257	1.09527	0.932327
CCG000746	probable linoleate 9S-lipoxygenase 5	1.43032	3.25858	3.2867	3.34698
CCG000755	P-loop containing nucleoside triphosphate hydrolases superfamily isoform 1 [Theobroma cacao]	-0.168102	-2.36972	-4.18326	-3.51535
CCG000756	cyclin family [Populus trichocarpa]	-0.704808	-2.88556	-4.0568	-4.21265
CCG000757	mitogen-activated kinase kinase kinase ANP1	0.136672	-0.499523	-2.41266	-1.04875
CCG000762	serine--tRNA ligase	-0.105485	-0.741668	-1.175	-0.253917
CCG000764	uncharacterized GPI-anchored At3g06035-like	0.0422288	-0.348128	-2.07595	-3.56659
CCG000768	glucose and ribitol dehydrogenase homolog 1	3.15894	-1.01096	-0.137042	1.77553
CCG000770	amidase 1-like	-0.385635	-1.93136	-0.486105	-1.46731
CCG000774	PREDICTED: uncharacterized protein LOC103495165	-0.636691	-1.9456	-3.82184	-1.25733
CCG000780	type I cytoskeletal 9	-1.5514	-2.32806	-2.49931	-1.57108
CCG000782	probable serine threonine- kinase NAK	-0.534841	-0.689466	-1.27148	-1.15133
CCG000808	acyl- -binding	0.127058	-0.323603	-1.09319	-1.19429
CCG000810	group [Theobroma cacao]	0.192088	0.282398	-0.593619	-1.98964
CCG000814	Serine threonine kinases,ATP binding,sugar binding,kinases,carbohydrate isoform 1 [Theobroma cacao]	2.03231	4.29108	4.66409	6.40721
CCG000815	G-type lectin S-receptor-like serine threonine- kinase At4g03230	0.0955324	-1.26551	-0.854296	-1.41504
CCG000816	receptor-like serine threonine- kinase SD1-8	0.51559	1.06796	1.2021	0.715531
CCG000817	receptor-like serine threonine- kinase SD1-8	3.47695	2.00456	3.7852	4.01981
CCG000818	MATE efflux family chloroplastic-like	-0.578043	-3.01832	-4.97587	-2.77977
CCG000819	squalene synthase 1	0.403222	-1.07575	-1.65844	-1.47896
CCG000821	subtilisin-like protease	-0.280714	-2.02624	-5.57908	-3.37175
CCG000822	GATA transcription factor 5-like	0.360607	1.26445	2.42091	2.73485
CCG000828	endoglucanase 24-like	-1.09047	-2.64758	-3.44557	-3.82891
CCG000829	hypothetical protein CICLE_v10029808mg, partial [Citrus clementina]	0.185841	1.10129	1.32802	0.882032
CCG000830	fructose-bisphosphate aldolase chloroplastic	0.420491	-0.64473	-1.00887	-0.874897
CCG000837	arginine decarboxylase	1.20049	1.24319	0.410836	1.49727
CCG000838	---NA---	7.40505	1.34116	0.43185	0.952521
CCG000842	Octicosapeptide Phox Bem1p family isoform 1 [Theobroma cacao]	1.0926	3.91572	3.59144	1.84394
CCG000846	ABC transporter B family member chloroplastic	-0.400195	1.71196	1.84177	2.24819
CCG000847	Tetratricopeptide repeat-like superfamily [Theobroma cacao]	0.0362187	2.27334	2.98979	1.54924
CCG000849	TRANSPARENT TESTA 12-like	-0.352146	0.124137	1.29794	0.367353
CCG000850	2-alkenal reductase (NADP(+)-dependent)-like isoform X2	0.93155	6.92604	6.62224	6.44783
CCG000857	UPF0481 At3g47200-like	-0.597541	-2.20444	-5.06454	-6.56715
CCG000869	kinesin NACK1 [Vitis vinifera]	-0.203951	-1.93407	-3.17439	-2.48697
CCG000872	EG45-like domain containing	0.849145	4.55631	5.48409	2.61564
CCG000873	lactoylglutathione lyase-like [Malus domestica]	-0.656276	-1.83574	-4.24247	-6.31674
CCG000874	B-box type zinc finger family [Theobroma cacao]	-0.0108954	0.522949	1.07161	1.9093
CCG000880	probable pectinesterase 53	0.345836	-2.41475	-7.22005	-2.83993
CCG000886	cytochrome P450 84A1-like	0.560031	2.35322	2.52778	1.91308
CCG000890	probable leucine-rich repeat receptor kinase At1g35710	-0.476926	-2.82121	-3.9278	-5.01407
CCG000891	probable LRR receptor-like serine threonine- kinase At4g36180	0.709755	-0.284762	-0.866985	-1.12077
CCG000895	aldehyde dehydrogenase family 3 member F1	0.027837	1.0124	0.862384	1.28773
CCG000896	glyceraldehyde-3-phosphate testis-specific	0.136301	1.60939	0.975761	1.0784
CCG000898	probable methyltransferase PMT27	8.02767	5.87266	2.89441	6.56001
CCG000899	SHI RELATED SEQUENCE 1-like	0.778516	0.644538	-0.780853	1.28766
CCG000903	WALLS ARE THIN 1-like	-0.814273	-1.68318	-0.218193	-0.344689
CCG000904	WALLS ARE THIN 1-like	-0.603383	-2.00267	-2.14235	-0.776543
CCG000905	WALLS ARE THIN 1-like	-0.331023	-1.7113	-2.704	-3.28902
CCG000906	Purple acid phosphatase 25 [Morus notabilis]	-0.192015	-1.78605	-2.16589	-0.806765
CCG000910	pentatricopeptide repeat-containing At1g64100-like	-0.951694	-0.863951	-0.206715	-1.06642
CCG000912	Thioredoxin H-type	0.253743	0.893783	1.22624	0.508538
CCG000913	beta-galactosidase 3	0.850673	-0.974225	-4.73564	-3.89395
CCG000917	D-2-hydroxyglutarate mitochondrial	0.242778	1.02712	1.17883	0.349583
CCG000918	bifunctional epoxide hydrolase 2-like	0.589222	1.92484	1.72208	1.10698
CCG000919	bifunctional epoxide hydrolase 2-like	1.13252	3.06067	3.51121	3.89316
CCG000921	50S ribosomal cyanelle [Nicotiana sylvestris]	-0.28924	-0.816117	-1.03936	0.360279
CCG000922	peroxidase 72-like	0.260286	1.5371	0.694209	0.791494
CCG000926	dehydrin 1 [Vitis vinifera]	NA	9.60969	7.91758	7.65199
CCG000927	---NA---	0.0847076	0.587959	1.15173	-0.0307136
CCG000928	cytochrome P450 716B1-like	-0.197786	1.22905	1.15365	0.387724
CCG000932	ocs element-binding factor 1-like	0.0734247	0.0562219	0.763519	1.49371
CCG000934	transcription factor bHLH110-like	-0.762463	-2.55716	-3.02488	-1.94758
CCG000935	phosphatidylinositol phosphatidylcholine transfer SFH12-like isoform X2	-0.819559	-3.37466	-2.97955	-0.581274
CCG000936	probable mitochondrial import inner membrane translocase subunit TIM21	-0.162367	-0.714152	-1.03854	-0.551156
CCG000942	---NA---	3.16697	0.810792	0.183653	0.66018
CCG000943	nuclear transcription factor Y subunit A-7-like isoform X1 [Elaeis guineensis]	0.306368	2.11234	1.69827	0.0652957
CCG000944	PREDICTED: uncharacterized protein LOC104597411	-0.50693	0.0999979	-0.149535	-1.44034
CCG000945	G-type lectin S-receptor-like serine threonine- kinase SD3-1 [Pyrus x bretschneideri]	0.0153014	0.00997253	-1.04316	-0.502534
CCG000957	GRF1-INTERACTING FACTOR 1 family [Populus trichocarpa]	0.0632987	-0.557724	-3.35346	-1.53263
CCG000960	F-box LRR-repeat 17-like	0.609455	-0.301324	-3.49218	-4.84855
CCG000961	auxin-responsive IAA16-like	-1.84486	-6.01333	-6.04688	-6.10971
CCG000962	probable carbohydrate esterase At4g34215	-0.409659	1.8688	2.06441	3.76737
CCG000965	tryptophan synthase alpha chain-like	0.0151562	-0.52714	-1.54585	-0.539097
CCG000966	Light-inducible CPRF2 [Morus notabilis]	-0.162319	0.498744	1.02379	0.614492
CCG000974	histone H2A variant 1 [Cucumis sativus]	-0.0262413	-0.698475	-1.7936	-3.42159
CCG000983	Winged-helix DNA-binding transcription factor family [Theobroma cacao]	-1.5942	1.24702	1.14437	-0.907711
CCG000985	ethylene-responsive transcription factor 8-like	-1.44084	-0.0788662	1.3971	1.65747
CCG000991	E3 ubiquitin ligase DRIP2	0.11482	-0.475104	-1.44659	-0.987152
CCG000994	probable galacturonosyltransferase 6 isoform X1	0.458106	1.03568	0.13649	-0.176966
CCG000995	photosystem II reaction center W chloroplastic-like	-0.881962	-1.15752	0.589618	-1.92169
CCG000996	suppressor SRP40	-0.443208	-2.02179	-3.42662	-2.02664
CCG001002	GDSL-motif lipase [Theobroma cacao]	-0.615577	1.64623	3.12671	2.20617
CCG001003	GDSL lipase [Theobroma cacao]	-0.437361	2.43746	3.34563	2.42981
CCG001004	GDSL lipase [Theobroma cacao]	-0.292081	2.51712	3.42927	3.02568
CCG001005	serine carboxypeptidase-like 51	-0.168003	-1.79338	-2.68682	-3.02065
CCG001006	---NA---	1.6401	0.88528	-0.290671	0.42093
CCG001007	probable polyamine transporter At1g31830 isoform X1	1.51348	0.871044	-0.377799	0.58668
CCG001009	kinesin [Medicago truncatula]	0.00879699	-0.719135	-1.50749	-0.587986
CCG001014	Cysteine Histidine-rich C1 domain family [Theobroma cacao]	0.174575	-1.04649	-0.981292	-1.67972
CCG001015	ATP-dependent Clp protease proteolytic subunit chloroplastic	-0.334938	-1.1015	-1.28958	-2.08001
CCG001018	DC1 domain-containing family [Populus trichocarpa]	-0.00483312	-1.2252	-2.17815	-1.86583
CCG001023	Ankyrin repeat-containing [Theobroma cacao]	5.64859	6.47986	5.69396	7.19972
CCG001027	Ankyrin repeat-containing [Theobroma cacao]	-0.827806	-1.65225	-0.39763	-2.88451
CCG001031	Ankyrin repeat-containing [Theobroma cacao]	4.15926	2.43877	3.66499	3.52882
CCG001044	probable mediator of RNA polymerase II transcription subunit 26b	-0.529318	-2.69627	-2.40678	-1.35437
CCG001045	ynbB [Gossypium arboreum]	0.126036	1.34237	1.85068	1.18953
CCG001049	phytohormone-binding -like	-1.01081	-0.0129424	2.56162	-0.57879
CCG001051	Late embryogenesis abundant (LEA) -related [Theobroma cacao]	1.19653	-1.86505	-4.17955	-5.81441
CCG001052	Late embryogenesis abundant (LEA) -related [Theobroma cacao]	-0.795659	-1.8495	-1.26797	-1.93112
CCG001053	Late embryogenesis abundant (LEA) -related [Theobroma cacao]	-0.138705	-3.11889	-6.57924	-5.20992
CCG001054	Late embryogenesis abundant (LEA) -related [Theobroma cacao]	0.64042	-0.762208	-4.14023	-5.02677
CCG001055	receptor kinase THESEUS 1	-1.01734	-3.47208	-5.04217	-4.1995
CCG001056	ABC transporter G family member 29-like	-0.70045	-1.49019	-0.670538	-1.04853
CCG001063	probable mediator of RNA polymerase II transcription subunit 26b	-0.0388995	0.0905115	0.217067	-1.92669
CCG001071	probable ADP-ribosylation factor GTPase-activating AGD5	0.38991	0.954094	1.053	0.341053
CCG001072	UDP-glucuronosyltransferase 2B1	1.54492	2.11718	1.88137	0.877755
CCG001073	cytochrome c-type biogenesis ccda-like chloroplastic isoform X2	0.323789	1.46048	1.85064	0.291314
CCG001076	chlorophyll a-b binding chloroplastic	0.504461	-0.997017	-0.615175	-3.79281
CCG001077	mediator of RNA polymerase II transcription subunit 1-like	-0.046038	-1.5399	-1.97679	-1.14585
CCG001080	cyclic nucleotide-gated ion channel 4	-1.72464	-2.19915	-4.39321	-4.64564
CCG001082	membrane lipo lipid attachment site	-0.139696	-1.17663	-4.21606	-4.32941
CCG001084	tRNA-splicing endonuclease subunit Sen2-1-like	1.36207	0.41531	0.288015	0.0951738
CCG001085	vesicle-associated 4-1-like	0.525116	1.29662	1.13619	-0.966899
CCG001086	hypothetical protein JCGZ_00710	-0.711399	0.644338	1.11643	-2.41828
CCG001087	Wound-responsive family [Theobroma cacao]	-2.19471	-5.62005	-2.48751	-5.97057
CCG001088	Wound-responsive family [Theobroma cacao]	-1.89813	-3.79256	-1.37988	-3.68731
CCG001089	Wound-responsive family [Theobroma cacao]	-1.17813	-4.07427	-1.46452	-2.64342
CCG001090	Wound-responsive family [Theobroma cacao]	-0.9125	-3.10235	-1.02117	-3.43025
CCG001091	---NA---	-1.38149	-2.80854	0.108509	-2.46359
CCG001092	2-nonaprenyl-3-methyl-6-methoxy-1,4-benzoquinol hydroxylase [Theobroma cacao]	-1.66583	-3.08104	-0.696708	-5.36078
CCG001095	diacylglycerol kinase 5-like isoform X1 [Elaeis guineensis]	0.897886	2.36331	1.63298	1.99703
CCG001105	Fanconi anemia group D2 homolog	0.196857	-1.28257	-1.15679	-0.0319053
CCG001106	Fanconi anemia group D2 homolog isoform X1	0.166399	-1.25057	-1.21286	0.200294
CCG001107	transcription factor MYB39	0.976135	0.655618	0.967813	2.07803
CCG001115	hypothetical protein PRUPE_ppa017436mg [Prunus persica]	0.625929	0.562688	-0.764142	-3.92652
CCG001118	zinc finger CONSTANS-LIKE 4-like	1.45483	2.46008	2.80018	2.41988
CCG001120	disease resistance RPP13 1 [Vitis vinifera]	1.06213	-0.53708	0.762065	0.26934
CCG001127	basic 7S globulin-like	0.667526	3.37035	3.30885	2.2463
CCG001136	Phospho phosphatase isoform 1 [Theobroma cacao]	0.364832	0.0888618	-0.127809	-1.04474
CCG001137	TMV resistance N-like	-0.849193	-0.603549	-1.37637	-1.39009
CCG001149	---NA---	-0.349414	-0.588057	-0.0202792	-1.67695
CCG001154	---NA---	-1.04301	-1.53618	-2.205	-0.965107
CCG001156	probable serine threonine- kinase NAK	2.2836	1.77531	1.78708	2.05896
CCG001157	Serine threonine- kinase cx32 isoform 2 [Theobroma cacao]	2.47529	1.78453	1.8256	2.22902
CCG001158	Bromodomain and PHD finger-containing 3 [Morus notabilis]	0.258732	0.645857	1.0216	0.705654
CCG001159	transport and Golgi organization 2 homolog	0.0880423	1.49742	1.1202	-0.184815
CCG001160	EC homolog 2-like	4.35731	5.6557	4.88465	2.39068
CCG001165	EXORDIUM-like 5	-1.84463	-2.41888	-3.46432	-2.17864
CCG001167	proton-coupled amino acid transporter 3-like	0.390429	1.88777	1.82091	1.08812
CCG001171	UPF0481 At3g02645-like	0.184351	1.23728	1.19435	-0.265563
CCG001174	nucleolar complex 4 homolog	-0.700103	-1.38653	-1.06127	0.827784
CCG001175	probable phosphatase 2C 27 [Pyrus x bretschneideri]	-0.18697	0.890494	1.29586	0.89294
CCG001177	homoserine kinase-like	-0.189828	-0.514356	-1.04439	-0.835236
CCG001178	monosaccharide-sensing 2 [Cucumis melo]	-0.220668	-1.0942	-1.49844	-0.780573
CCG001180	mitochondrial phosphate carrier mitochondrial-like	-0.52811	-0.924309	-1.89326	1.19213
CCG001181	calcium-dependent kinase 26-like [Populus euphratica]	0.581707	1.44288	1.33373	0.860303
CCG001182	calcium-dependent kinase 26-like [Eucalyptus grandis]	-1.02024	-1.96154	-8.03312	-4.0591
CCG001184	UPF0481 At3g47200-like	-0.0308972	-4.51115	-5.59642	-4.49395
CCG001190	Phosphoglycerate mutase family [Theobroma cacao]	-0.00663388	-0.482152	-2.32591	-1.50144
CCG001194	lysine histidine transporter-like 8	1.76773	3.33679	1.96061	3.22809
CCG001196	phospho ECPP44-like	1.21843	0.728853	-4.09295	-5.20211
CCG001197	Group 2 isoform 2 [Theobroma cacao]	-1.22413	-1.19721	-1.1679	-2.51303
CCG001199	L-ascorbate oxidase homolog	2.33661	-1.1787	-2.801	-3.28954
CCG001204	F-box SKIP23-like	0.0542061	0.770793	1.08305	0.387052
CCG001206	(RS)-norcoclaurine 6-O-methyltransferase-like	-0.425553	-2.76731	-3.15354	-1.556
CCG001207	heterodimeric geranylgeranyl pyrophosphate synthase small chloroplastic	-0.0388984	1.11209	1.46861	0.938412
CCG001208	F-box LRR-repeat 10	0.173171	1.07418	1.44357	-0.110209
CCG001209	Serine threonine- kinase HT1 [Morus notabilis]	-0.212759	2.10988	2.25114	0.369073
CCG001216	Mitochondrial import ZIM17 [Morus notabilis]	-0.176606	0.551703	1.12573	0.473762
CCG001221	Uncharacterized protein TCM_006557 [Theobroma cacao]	-0.320485	-1.49578	-3.94593	-5.57896
CCG001230	plant F20M13-60	-0.314701	-0.722365	-1.11567	-1.22943
CCG001232	Phytoene [Ricinus communis]	-1.04371	-0.134107	0.00878042	-1.14211
CCG001234	PREDICTED: uncharacterized protein LOC105141197	-0.295329	-1.3597	-2.34579	-0.609768
CCG001235	probable phosphatase 2C 60 [Cucumis melo]	-0.124741	1.18586	0.81882	1.03277
CCG001238	zeaxanthin chloroplastic-like	0.08598	3.00256	2.87151	3.33284
CCG001239	zeaxanthin chloroplastic-like	-0.333231	-1.30413	-0.350662	-0.719966
CCG001241	zeaxanthin chloroplastic-like	0.950216	3.37396	1.77918	3.46248
CCG001242	zeaxanthin chloroplastic-like	1.27035	3.71525	2.17955	3.69573
CCG001243	probable mannitol dehydrogenase	0.818986	4.10106	3.01332	2.6148
CCG001245	zeaxanthin chloroplastic-like	-0.0939675	3.4292	3.01763	0.774181
CCG001246	zeaxanthin chloroplastic-like	-0.185368	3.29337	2.95567	0.790502
CCG001248	zeaxanthin chloroplastic-like	-0.0448617	0.474606	1.10136	0.889293
CCG001256	Blue copper	-0.757602	-2.07886	-4.00125	-4.29585
CCG001258	Phospholipase isoform 2 [Theobroma cacao]	0.674182	1.56282	1.53619	1.4518
CCG001260	probable aquaporin PIP2-8	-0.541042	-2.96891	-2.75595	-4.55718
CCG001266	probable mannitol dehydrogenase	0.477524	3.701	2.62682	1.01644
CCG001269	WALLS ARE THIN 1-like	-0.237277	-1.97581	-3.31778	-2.14393
CCG001274	SHI RELATED SEQUENCE 5-like	-0.0133554	-1.10943	-0.983255	-0.110669
CCG001275	coatomer subunit alpha-1-like	-0.0561051	-0.623862	-1.15887	-0.875324
CCG001276	S-type anion channel SLAH1-like	-0.830422	1.26385	1.55028	2.39761
CCG001277	UDP- [Ricinus communis]	-1.07995	-1.00578	-1.47996	-1.79898
CCG001278	UDP-glucose glucosyltransferase [Pyrus x bretschneideri]	-0.509	2.08111	2.95786	2.19054
CCG001279	triacylglycerol lipase 1	-0.0486893	-0.111194	0.302476	-1.05681
CCG001284	alcohol dehydrogenase	-0.41125	0.900781	0.732692	-1.99443
CCG001285	alcohol dehydrogenase 1-like [Eucalyptus grandis]	-0.138127	0.761976	0.528207	-2.58094
CCG001286	G-type lectin S-receptor-like serine threonine- kinase RLK1	3.4935	2.4976	2.89819	3.56526
CCG001290	PREDICTED: uncharacterized protein LOC100243200 [Vitis vinifera]	0.132472	0.455539	1.83585	1.97361
CCG001293	Polymerase histidinol phosphatase- isoform 1 [Theobroma cacao]	-0.333548	-0.921479	-0.314473	1.12755
CCG001296	chitinase 2-like	-0.520965	-1.93322	-3.71387	-5.0796
CCG001304	chitinase 2-like	1.10061	3.12304	3.29637	3.23808
CCG001305	125 kDa kinesin-related -like	-0.255615	-1.83971	-3.79348	-3.06853
CCG001307	respiratory burst oxidase homolog H	1.14022	-0.831574	-5.56296	-6.86913
CCG001309	Embryo-specific [Theobroma cacao]	0.709244	0.653208	-0.617247	-2.11693
CCG001310	laccase-17-like	0.339103	0.0645438	-4.44572	-7.94088
CCG001313	laccase-17-like	0.124364	-0.711418	-5.63088	-9.50127
CCG001320	Synergin gamma	0.936416	1.43166	0.511906	0.906977
CCG001327	ABC transporter G family member 4-like	-2.08998	-6.02516	-4.68323	-4.65592
CCG001328	Late embryogenesis abundant hydroxyproline-rich glycofamily [Theobroma cacao]	0.00703823	-6.71379	-6.74721	-6.80995
CCG001329	Late embryogenesis abundant hydroxyproline-rich glycofamily [Theobroma cacao]	2.07908	0.940861	1.59725	2.9246
CCG001330	Late embryogenesis abundant hydroxyproline-rich glycofamily [Theobroma cacao]	2.11008	1.99877	3.55957	3.89265
CCG001333	reticulon B1 [Vitis vinifera]	0.0192576	-0.285694	-2.38645	-1.99982
CCG001335	P-loop containing nucleoside triphosphate hydrolases superfamily [Theobroma cacao]	0.438358	0.45429	-1.06614	0.932324
CCG001336	S-type anion channel SLAH2-like	0.240544	1.81561	1.29004	0.898801
CCG001337	probable membrane-associated kinase regulator 6	1.2857	1.55244	1.10679	1.85366
CCG001340	G-type lectin S-receptor-like serine threonine- kinase At5g24080	6.07058	5.24437	-1.56997	2.18744
CCG001344	WD repeat-containing 91 homolog	-1.645	-2.5959	-1.58466	-0.910574
CCG001345	WD repeat-containing 91 homolog	1.52041	-0.100474	-1.00561	-0.921477
CCG001347	receptor 12 isoform X1 [Populus euphratica]	0.151433	4.19574	5.2149	4.98281
CCG001348	timeless homolog	-0.218769	-2.10332	-2.7422	-1.19795
CCG001349	plastidial pyruvate kinase 2	-0.194018	-1.18207	-2.42812	-0.767896
CCG001351	LIM domain-containing isoform 1 [Theobroma cacao]	-0.208831	-0.907686	-2.71702	-1.92255
CCG001355	ABC transporter family [Populus trichocarpa]	-1.13168	-1.96218	0.300741	-0.0616561
CCG001357	ABC transporter C family member 10-like [Populus euphratica]	0.0586793	1.22677	0.722588	-0.248056
CCG001359	ABC transporter C family member 10-like	-0.696004	-1.13684	-0.90996	-0.718741
CCG001362	Ubiquitin-associated 1	0.600112	1.03473	1.321	1.01249
CCG001363	HAT transposon superfamily isoform 2 [Theobroma cacao]	0.318927	1.01573	1.01882	0.577413
CCG001364	probable inactive receptor kinase At4g23740	0.335833	1.4533	1.62347	1.43706
CCG001367	ethylene-responsive transcription factor CRF4-like	-0.0174331	-2.30989	-4.75229	-1.68869
CCG001371	mitochondrial carrier MTM1-like	0.211678	0.838575	0.640033	1.10703
CCG001372	arabinogalactan peptide 20-like	-0.963401	-4.76861	-7.93404	-6.61644
CCG001376	probable WRKY transcription factor 53	5.13819	3.57199	3.88739	5.47448
CCG001378	triptychon and [Ricinus communis]	0.111926	-1.29156	-3.06682	-5.72161
CCG001381	bidirectional sugar transporter SWEET3 [Populus euphratica]	-0.804412	-3.34668	-0.546767	-1.55169
CCG001382	bidirectional sugar transporter SWEET3b	-0.624319	-2.84746	-3.16324	-2.64455
CCG001383	bidirectional sugar transporter SWEET3b	-0.429174	-3.09845	-3.60401	-2.65423
CCG001389	probable trehalose-phosphate phosphatase C isoform X1 [Populus euphratica]	1.01038	-0.264214	-0.764456	-1.08573
CCG001391	senescence-associated	0.314294	0.361091	1.54555	-0.892229
CCG001410	kinesin-related 11-like isoform X2	0.382344	0.0282366	-1.89022	-1.83302
CCG001411	probable salt tolerance At1g75540	0.801891	0.328078	0.042719	-1.61883
CCG001416	DNA replication licensing factor MCM4	0.0156514	-1.98142	-3.01811	-2.44875
CCG001419	Purple acid phosphatase	0.0518872	1.43126	0.570972	-1.16761
CCG001420	purple acid phosphatase 2-like	-0.831471	-1.64697	-1.29797	-3.68766
CCG001421	purple acid phosphatase	0.48742	1.46033	2.56136	0.913833
CCG001422	purple acid phosphatase	6.03002	4.78613	6.73462	6.13952
CCG001423	cytochrome P450 CYP72A219-like	1.47937	3.7545	3.50065	2.04018
CCG001426	secologanin synthase-like	1.60469	4.98621	5.41227	4.00328
CCG001427	Fe(III)-Zn(II) purple acid phosphatase family [Populus trichocarpa]	1.68139	9.37519	6.52448	2.94492
CCG001430	PHD finger family bromo-adjacent domain-containing isoform 1 [Theobroma cacao]	-0.221499	0.080373	1.02863	0.395589
CCG001431	beta-galactosidase 3-like	-0.135737	-1.34984	-2.71036	-3.48199
CCG001433	BEL1-like homeodomain 6	-1.12611	-0.0832765	0.606758	0.520846
CCG001436	conserved hypothetical protein [Ricinus communis]	-0.907695	-0.486602	0.136353	-1.30107
CCG001439	A-agglutinin anchorage subunit [Jatropha curcas]	0.640795	1.09352	1.00761	1.51283
CCG001440	late embryogenesis abundant	4.93395	3.05834	3.24426	2.92294
CCG001442	Aspartate carbamoyltransferase	-0.232478	-3.04474	-1.98605	-1.71352
CCG001444	ocs element-binding factor 1-like	-0.250059	-1.00381	-0.590061	0.587021
CCG001446	phosphatidylinositol phosphatidylcholine transfer SFH3-like [Populus euphratica]	0.130787	-0.183648	-0.123479	1.7831
CCG001450	probable mitochondrial chaperone BCS1-B	-0.375278	1.15558	1.35403	1.56287
CCG001451	PREDICTED: uncharacterized protein LOC103440386	0.875892	1.30055	1.23893	0.443357
CCG001458	isoflavone 2 -hydroxylase-like	3.02919	4.60861	3.81909	2.65432
CCG001459	Cytochrome family subfamily polypeptide [Theobroma cacao]	0.148323	2.66608	2.71525	0.548583
CCG001465	E3 ubiquitin- ligase ATL9	-0.0491653	-0.510685	-2.41485	-1.53111
CCG001469	---NA---	0.46561	1.45435	0.664712	0.880376
CCG001482	ubiquitin 5	0.050039	0.826552	1.32766	1.07727
CCG001484	hypothetical protein PRUPE_ppa009258mg [Prunus persica]	-0.56617	-1.23127	-0.973318	-0.824663
CCG001487	auxin response factor 18 [Vitis vinifera]	-0.339643	-1.3754	-1.69492	-1.48179
CCG001488	GATA transcription factor 11-like	-0.832286	-1.82491	-2.58955	-2.66178
CCG001491	uncharacterized membrane At1g06890-like [Populus euphratica]	-0.0150901	-0.244884	-3.37124	-6.79163
CCG001492	isoform 1 [Theobroma cacao]	0.255194	0.855988	-2.09906	-1.23169
CCG001493	Glycosyltransferase family 2 [Theobroma cacao]	1.66752	0.728219	0.444512	1.00293
CCG001494	cytokinin riboside 5 -monophosphate phosphoribohydrolase LOG1	0.915755	0.537632	-0.936254	1.80357
CCG001500	receptor-like serine threonine- kinase NCRK [Vitis vinifera]	-0.0578814	-0.602087	-0.754437	-2.13708
CCG001501	binding [Ricinus communis]	-0.125532	1.46498	1.86201	2.37132
CCG001503	bifunctional monodehydroascorbate reductase and carbonic anhydrase nectarin-3-like	-1.00494	0.0169009	0.14143	-0.0751334
CCG001505	hypothetical protein JCGZ_05489	0.0608022	-2.37262	-0.392848	-0.699424
CCG001511	Telomere repeat-binding 4 [Morus notabilis]	-0.231204	-0.699229	-1.24335	-0.949552
CCG001512	hypothetical protein CISIN_1g037790mg	-0.0312613	-0.755525	-3.02549	-4.60364
CCG001514	OTU domain-containing DDB_G0284757-like isoform X1 [Nelumbo nucifera]	0.110274	-1.0333	-2.35232	-2.34415
CCG001516	ru large subunit-binding subunit alpha	0.0848855	-0.567988	-1.83158	-0.766801
CCG001517	---NA---	-1.91006	-3.84672	-2.08701	-0.861158
CCG001530	mRNA cap guanine-N7 methyltransferase 1 [Cucumis melo]	-0.631623	0.575658	1.30408	0.441357
CCG001531	beta-glucosidase 41	-0.146501	1.46496	1.45708	0.838483
CCG001534	spindle pole body component	-1.53425	1.1469	1.35445	-0.82477
CCG001535	organic cation carnitine transporter 4	-0.94375	0.720686	1.29308	1.33017
CCG001540	Kinase superfamily isoform 1 [Theobroma cacao]	0.578601	0.755338	0.934328	1.1004
CCG001543	zinc finger family [Populus trichocarpa]	-0.896002	-2.53323	-4.0838	-2.77347
CCG001545	mediator-associated 1-like isoform X1 [Camelina sativa]	5.25725	3.98482	2.73813	2.84952
CCG001546	mediator-associated 1-like	4.86695	3.10882	2.84859	3.82096
CCG001547	formin 5	0.25006	0.403012	0.506966	1.27575
CCG001549	kinesin-3-like isoform X1	-0.190734	-0.798289	-2.63485	-2.70756
CCG001552	probable galacturonosyltransferase 12	-0.0282663	-0.284571	-1.74993	-5.34157
CCG001554	disease resistance At4g27190-like	0.579175	1.75326	2.52718	1.64872
CCG001555	autophagy-related 18f-like	-0.159786	1.2775	1.68511	0.770302
CCG001556	autophagy-related 18f-like	-0.366273	1.44301	2.0209	1.02238
CCG001564	multidrug resistance	2.28063	0.60348	-1.0954	-1.04539
CCG001565	NDR1-like	0.617886	-0.896867	-1.45076	-0.880687
CCG001566	NDR1-like	1.77713	0.749365	-0.0141135	-0.403157
CCG001567	NDR1-like	1.86245	0.5745	0.391459	-0.756181
CCG001568	gibberellin 2-beta-dioxygenase 8-like	7.68239	4.95431	NA	5.12785
CCG001570	polyubiquitin 3 [Medicago truncatula]	1.61138	2.2828	0.805193	0.973686
CCG001571	2S sulfur-rich seed storage 2-like	6.91963	5.84192	7.00892	5.93161
CCG001574	translation factor SUI1 homolog	0.112369	0.872987	1.24077	0.432596
CCG001575	triptychon and [Ricinus communis]	-0.854615	-1.8683	-1.11154	-0.515969
CCG001580	expansin-A15-like [Nelumbo nucifera]	-0.395893	-2.04452	-4.27803	-3.14784
CCG001588	glutamate receptor -like	-0.630054	-1.00367	-0.449918	2.39143
CCG001592	Cycloeucalenol cycloisomerase [Medicago truncatula]	-0.0689947	-0.782123	-1.41497	-1.73695
CCG001594	calcium-binding CML19-like	0.677193	3.5059	3.18811	4.08327
CCG001595	uridine kinase chloroplastic	-0.21596	-2.90923	-3.07089	-2.59789
CCG001599	RPM1-interacting 4 isoform X2 [Vitis vinifera]	-0.953527	0.170573	0.505684	-2.49852
CCG001604	Phosphotyrosine phosphatases superfamily [Theobroma cacao]	1.02179	1.65165	1.83169	1.41357
CCG001616	kinase TMKL1	-0.538541	-1.15289	-6.31985	-3.36823
CCG001623	U-box domain-containing 35-like [Jatropha curcas]	-0.40933	0.977187	1.21387	1.11018
CCG001629	Fatty acid hydroxylase superfamily [Theobroma cacao]	-0.562192	1.09113	0.731598	2.26988
CCG001631	transcription factor PAR2-like	0.227937	-2.4394	-8.57028	-5.61231
CCG001632	Sequence-specific DNA binding transcription [Theobroma cacao]	0.579486	-1.74257	-3.5324	-2.51816
CCG001633	---NA---	6.94487	NA	NA	NA
CCG001634	Double-strand-break repair rad21 [Theobroma cacao]	0.069709	-3.39145	-6.52081	-5.95622
CCG001636	cation H(+) antiporter 4-like	2.79949	1.35697	0.348957	2.50986
CCG001638	probable E3 ubiquitin- ligase XBOS32	-0.459971	-1.22025	-0.435031	-0.507948
CCG001639	zinc finger family [Populus trichocarpa]	0.442532	0.82103	0.477869	1.92697
CCG001642	PREDICTED: uncharacterized protein LOC103323338	-0.261963	0.724456	0.814336	1.52801
CCG001644	probable cyclic nucleotide-gated ion channel 17	0.156792	-0.56707	-1.02068	-1.0682
CCG001647	BNR Asp-box repeat family isoform 1 [Theobroma cacao]	-0.565024	-1.8267	-1.53722	-0.418679
CCG001651	glutamate receptor -like	1.1637	1.2037	0.0127495	1.51658
CCG001653	GLUTAMINE DUMPER 3	-1.71556	0.206099	0.269934	-0.220187
CCG001654	PTI1-like tyrosine- kinase At3g15890	-0.77457	2.50826	2.6559	2.81724
CCG001655	probable receptor-like serine threonine- kinase At5g57670-like isoform X2	-0.196429	-2.45822	-4.90741	-7.55019
CCG001661	Transferring glycosyl groups [Theobroma cacao]	1.35464	3.3642	2.86898	2.27918
CCG001662	xylose isomerase	-0.0264654	1.53818	2.52003	0.60343
CCG001663	CBL-interacting serine threonine- kinase 21	0.336681	0.641889	0.292806	1.37655
CCG001665	pathogenesis-related PR-1-like	0.0582028	-1.66551	-2.68997	-3.1559
CCG001682	monothiol glutaredoxin-S9-like	0.991824	1.94248	2.69701	2.65021
CCG001683	glutaredoxin family [Populus trichocarpa]	2.31376	5.61466	2.57495	6.08483
CCG001689	BTB POZ domain-containing At1g03010-like isoform X1	0.0118214	-2.22523	-2.60413	-1.68888
CCG001692	Spermatogenesis-associated 20	0.220839	0.542415	-0.0789192	1.23636
CCG001697	L-type lectin-domain containing receptor kinase -like	3.61692	4.00301	4.31866	4.35315
CCG001698	Concanavalin A-like lectin kinase family [Theobroma cacao]	3.97114	3.5811	3.69297	4.92354
CCG001705	hypothetical protein glysoja_014892	-1.37842	-3.06894	-7.00131	-6.17455
CCG001719	probable beta-D-xylosidase 6 isoform X1	-0.264515	-1.09768	-0.635641	-1.09356
CCG001721	---NA---	1.75389	-0.532115	-1.34869	-1.90211
CCG001723	Transcription factor bHLH93	-0.894045	-1.28986	-1.79965	-2.22225
CCG001724	Homeodomain-like superfamily [Theobroma cacao]	0.307635	0.409805	-0.690963	-1.43157
CCG001725	Hydroxyproline-rich glyco family [Theobroma cacao]	-0.721281	1.88237	1.19594	1.07218
CCG001729	gibberellin-regulated [Populus tomentosa]	0.0817834	-1.06763	-5.62224	-5.7909
CCG001733	MAR-binding filament 1 isoform 1 [Theobroma cacao]	0.154156	0.430391	1.2656	-0.0603929
CCG001745	phragmoplast orienting kinesin 2 isoform X1	0.0625331	-1.59577	-3.13445	-1.93113
CCG001746	nng65350D [Brassica napus]	0.210978	1.43615	2.26433	-1.58747
CCG001747	salicylic acid-binding 2-like	0.980971	2.58256	2.88654	2.76559
CCG001751	flavonol synthase flavanone 3-hydroxylase-like [Pyrus x bretschneideri]	-0.0638708	1.35819	2.63232	-0.446165
CCG001754	2-alkenal reductase (NADP(+)-dependent)-like	0.94411	2.40147	1.75526	0.954663
CCG001759	ethylene-responsive transcription factor ERF105-like	0.861239	0.742615	1.06266	0.68698
CCG001760	ethylene-responsive transcription factor ERF106	-0.555419	0.762422	2.09464	1.38788
CCG001764	Transducin WD40 repeat-like superfamily isoform 1 [Theobroma cacao]	0.0997016	-0.748411	-1.77262	-1.59925
CCG001767	UPF0392 RCOM_0530710	-0.86724	-0.175819	-1.01305	-2.50675
CCG001769	serine threonine- kinase PBS1-like isoform X1	0.763225	-0.450454	-1.15937	-0.311812
CCG001770	probable serine threonine- kinase NAK	1.97056	2.44863	2.54092	2.76814
CCG001773	Basic-leucine zipper transcription factor family isoform 1 [Theobroma cacao]	-0.915891	0.939684	1.71039	1.67836
CCG001778	Mitochondrial RNA-splicing MRS3 [Morus notabilis]	0.220823	0.3843	0.143749	2.05969
CCG001779	transcription factor MYB44-like	0.909876	2.41874	2.21528	1.90983
CCG001780	unc-50 homolog	2.55841	2.26982	2.24336	0.985285
CCG001782	RING-H2 finger ATL69	0.390994	1.71919	-0.0401489	-2.19921
CCG001783	Cinnamyl alcohol dehydrogenase 1 [Morus notabilis]	-0.564957	0.279176	1.95895	0.359521
CCG001787	RING-H2 finger ATL69	-0.135905	1.89374	0.283599	-1.85465
CCG001789	unc-50 homolog	-1.09054	1.62088	-0.793808	-0.663162
CCG001790	transcription factor MYB44-like	1.22442	2.63658	2.47695	2.24928
CCG001791	Mitochondrial RNA-splicing MRS3 [Morus notabilis]	-0.887123	-0.138273	0.353356	1.73758
CCG001807	choline transporter 2	-0.144276	-0.772498	-1.64814	-1.04876
CCG001815	suppressor SRP40	0.306357	-0.818782	-6.07014	-4.48888
CCG001816	probable phosphatase 2C 39	1.08295	0.483405	0.0983485	-0.676934
CCG001818	late embryogenesis abundant group 3-like [Jatropha curcas]	0.483399	2.50658	3.43763	2.98874
CCG001822	MATE efflux family ALF5-like	-0.739255	3.03602	4.07606	4.27238
CCG001823	early nodulin 2	1.88645	2.43285	0.440822	-0.191211
CCG001825	zinc finger CCCH domain-containing 48-like isoform X1	1.97332	0.0593442	0.000890276	0.238961
CCG001829	dynamin-related 5A	0.186044	-0.389181	-2.48437	-1.32912
CCG001830	Stigma-specific Stig1 family [Theobroma cacao]	0.851839	-2.12517	-4.95931	-5.01491
CCG001831	Stigma-specific Stig1 family [Theobroma cacao]	0.9407	-2.36943	-4.14955	-4.78075
CCG001832	RNA-binding S4 domain-containing [Theobroma cacao]	-0.0557597	-0.502647	-1.66441	-0.129649
CCG001836	xylosyltransferase 2-like [Malus domestica]	0.31875	1.47989	1.72687	1.04036
CCG001837	xylosyltransferase 2-like [Malus domestica]	0.527197	0.890926	1.51842	1.18565
CCG001838	SPA1-RELATED 4 [Fragaria vesca vesca]	1.19796	-0.243454	-0.154715	0.607724
CCG001839	probable serine threonine- kinase At1g54610	-0.795188	-1.62992	-1.07035	-0.795774
CCG001841	PREDICTED: uncharacterized protein LOC103496084	-0.233143	0.785179	1.15454	0.567313
CCG001842	Cytochrome c oxidase copper chaperone [Morus notabilis]	0.304636	1.4168	1.84543	1.70932
CCG001843	metallothionein [Oryza rufipogon]	0.0476563	0.149657	1.39021	1.93331
CCG001844	probable ubiquitin-conjugating enzyme E2 25	0.268486	1.19876	1.16106	0.572913
CCG001846	PREDICTED: uncharacterized protein LOC100250261	2.49532	1.57968	1.68947	1.06601
CCG001848	PREDICTED: uncharacterized protein LOC100250261	1.66181	0.599046	0.44108	0.479153
CCG001850	RING-H2 finger ATL19	2.78412	6.48038	6.96513	8.17997
CCG001852	3-deoxy-manno-octulosonate mitochondrial	0.0100375	-0.798856	-1.98673	-1.16402
CCG001853	dynein light chain cytoplasmic-like	5.01039	3.28489	2.47549	3.89126
CCG001855	expansin-A12	0.10557	1.46574	1.73619	1.06143
CCG001859	CUP-SHAPED COTYLEDON 2-like	-1.44387	-4.76775	-7.80963	-3.03264
CCG001860	probable aminotransferase TAT2	-1.02733	3.40467	5.11872	3.81467
CCG001869	serine acetyltransferase chloroplastic-like	-1.16513	-1.20356	-0.859725	-2.96156
CCG001870	serine acetyltransferase chloroplastic-like	-1.3961	3.90618	4.48877	2.0651
CCG001871	serine acetyltransferase chloroplastic-like	-0.000201686	1.29672	1.60792	0.473418
CCG001874	pectinesterase QRT1	3.72943	0.475175	1.06139	2.76503
CCG001876	DNA damage response WSS1 [Morus notabilis]	0.393071	1.12123	0.977978	0.635817
CCG001877	mitochondrial import inner membrane translocase subunit TIM50-like	-0.105562	-0.257499	-1.24545	-0.226619
CCG001882	two-pore potassium channel 1 [Populus euphratica]	-1.72737	-1.4435	-2.78826	-2.38056
CCG001883	two-pore potassium channel 1 [Populus euphratica]	-0.174701	-6.31336	-3.8937	-2.39961
CCG001884	two-pore potassium channel 1-like isoform X1 [Malus domestica]	-0.288532	-0.70187	-0.735107	-1.07032
CCG001885	procyclic form-specific polypeptide B1-alpha	-0.200564	-1.12354	-1.27733	-0.890211
CCG001887	Na(+)-translocating NADH-quinone reductase subunit A	0.186543	-0.0298781	-0.77105	-1.02167
CCG001888	histone chaperone RTT106-like	0.686518	0.532879	-4.75621	-2.30117
CCG001893	vegetative cell wall gp1-like	-0.970689	-2.78606	-3.84617	-4.55355
CCG001894	Inactive beta-amylase chloroplastic	0.13563	1.72342	2.24279	0.49683
CCG001895	fasciclin-like arabinogalactan 1	4.17431	4.77109	4.03907	3.37697
CCG001897	fasciclin-like arabinogalactan 1	-0.372965	-2.68447	-5.69634	-4.48224
CCG001900	nudix hydrolase 2-like isoform X1 [Nicotiana sylvestris]	0.361074	-0.84893	0.0956403	1.40482
CCG001901	NAD-dependent deacetylase SRT1	0.106571	-0.53597	-1.56425	-0.37028
CCG001903	Nuclear transcription factor Y subunit B-9	1.17018	0.106716	-2.56107	-3.62479
CCG001905	intracellular transport USO1	0.270437	-0.268375	-1.60119	-1.19748
CCG001906	probable L-type lectin-domain containing receptor kinase	-0.625642	-2.15768	-2.89464	-4.09267
CCG001910	PREDICTED: uncharacterized protein LOC104877623 isoform X2 [Vitis vinifera]	0.274783	-0.230145	-1.81478	-1.40933
CCG001913	RPM1-interacting 4	0.197281	0.97967	1.20558	0.926484
CCG001916	cellulose synthase E1	0.626167	2.44567	3.30739	3.24183
CCG001917	cellulose synthase E6	0.46058	1.68175	2.66648	3.66851
CCG001918	cellulose synthase E6	0.310228	1.61081	2.05401	2.65194
CCG001923	DNA-directed RNA polymerases I and III subunit RPAC1	-0.689838	-1.91677	-1.4333	0.905292
CCG001924	ribosomal RNA methyltransferase nop2	-0.187019	-0.569933	-0.346264	1.04443
CCG001929	uncharacterized membrane At1g06890 isoform X2	-0.0675853	-0.582662	-5.45661	-3.19064
CCG001931	ABC transporter G family member 26	-0.888023	-1.64687	-6.13336	-0.676869
CCG001932	ABC transporter G family member 26 [Morus notabilis]	-0.557914	-1.57356	-1.47963	-0.775387
CCG001933	CWC15 homolog [Beta vulgaris vulgaris]	0.314044	1.25141	1.10533	0.816939
CCG001934	E3 ubiquitin- ligase At4g11680 isoform X1	-0.0725228	1.86742	2.02079	0.914698
CCG001936	alcohol dehydrogenase	0.0137864	1.83459	0.827026	-2.96151
CCG001937	alcohol dehydrogenase	-0.024055	1.88122	0.87466	-2.96634
CCG001939	alcohol dehydrogenase	-0.206615	1.74458	0.385671	-3.44237
CCG001945	heat shock 90-2	0.0737758	-0.845489	-1.56022	0.586287
CCG001958	probable LRR receptor-like serine threonine- kinase At4g26540	-0.795619	-1.52145	-2.71647	-1.82897
CCG001959	Regulatory recX [Morus notabilis]	-0.0613585	-0.954058	-1.84467	-0.686648
CCG001961	kinesin KP1-like [Populus euphratica]	-0.140902	-1.91616	-3.0212	-3.15253
CCG001962	uridine kinase 3	0.0377811	1.06381	2.06204	0.279124
CCG001963	fructose-bisphosphate cytoplasmic isozyme 1	2.20432	3.14605	3.34354	2.05367
CCG001965	sufE chloroplastic	0.11826	0.867246	0.727262	1.00668
CCG001966	Late embryogenesis abundant hydroxyproline-rich glyco [Theobroma cacao]	0.698257	1.16126	0.388742	2.64483
CCG001971	Heavy metal transport detoxification superfamily [Theobroma cacao]	-1.6562	1.22067	1.70077	-0.17713
CCG001974	MACPF domain-containing At4g24290-like isoform X1	0.276674	0.96319	1.08693	1.03622
CCG001988	Cyclase family isoform 1 [Theobroma cacao]	1.22244	3.23945	3.88588	4.1633
CCG001992	MLO 4	-0.337642	-1.68659	-6.60822	-0.913459
CCG001993	MLO 4	-0.324661	-2.24979	-3.99167	-0.374673
CCG001996	Serine threonine- kinase SRK2B	0.270824	1.5174	1.30493	1.50702
CCG001998	ATP-dependent DNA helicase Q-like 4A	0.106623	-0.60962	-1.74452	-0.704238
CCG001999	MATE efflux family chloroplastic-like [Eucalyptus grandis]	-0.386931	-1.37072	-2.84569	-2.62212
CCG002002	ATP binding cassette subfamily B4 isoform 2 [Theobroma cacao]	-1.49346	-1.37343	-0.364773	-0.779378
CCG002003	ATP-dependent DNA helicase Q-like 4A	-0.693785	-1.60209	-0.7863	-0.776626
CCG002008	probable acyl-activating enzyme peroxisomal	-1.08765	0.396699	3.47063	1.70138
CCG002009	probable acyl-activating enzyme peroxisomal	0.529426	2.01831	5.47205	3.32651
CCG002010	probable acyl-activating enzyme peroxisomal	0.28132	-0.812684	-3.175	-5.07619
CCG002011	class I chitinase [Dimocarpus longan]	1.40963	3.4249	4.79576	3.54628
CCG002013	Wall-associated kinase [Theobroma cacao]	-0.46422	1.17907	1.59195	2.68554
CCG002014	Chitinase (Class Ib) Hevein [Medicago truncatula]	-0.737813	1.33618	3.07717	3.08475
CCG002016	---NA---	NA	4.26473	6.23934	7.39366
CCG002017	Basic chitinase [Theobroma cacao]	-0.20944	4.0198	7.48958	6.96311
CCG002019	DAG chloroplastic	2.78412	6.60047	8.4836	7.8244
CCG002023	methionine aminopeptidase 2B [Arabidopsis thaliana]	0.551432	2.76915	3.07056	3.0111
CCG002038	ATP phosphoribosyltransferase chloroplastic-like	-0.0256608	-0.0587078	-0.529763	-1.28423
CCG002039	PREDICTED: uncharacterized protein LOC103335285	1.25031	1.37739	-0.105621	-0.589684
CCG002043	B3 domain-containing At3g19184-like	0.421006	-0.56256	-2.82458	-1.20409
CCG002044	B3 domain-containing [Morus notabilis]	0.365319	1.57409	2.1518	1.43176
CCG002045	cyclin dependent kinase inhibitor family [Populus trichocarpa]	0.177065	-1.32972	-4.37002	-2.59452
CCG002046	presequence protease chloroplastic mitochondrial-like	0.183728	-0.253438	-1.12241	0.310959
CCG002047	probable carboxylesterase 12	1.31283	1.39794	0.488904	0.312277
CCG002048	probable carboxylesterase 12	1.65745	1.42861	0.404536	-0.304443
CCG002050	serine carboxypeptidase-like 18	-0.551217	-1.04135	-1.00722	-0.884991
CCG002064	---NA---	0.886542	3.75911	2.87856	3.67566
CCG002067	licodione synthase-like	-1.15808	-1.88328	-4.40477	-6.90091
CCG002068	pentatricopeptide repeat-containing mitochondrial	0.0743036	-0.387842	-1.56211	0.387751
CCG002069	dirigent 25-like	0.235334	-0.0776615	-1.99484	-3.95051
CCG002071	exocyst complex component EXO70B1-like	2.03842	2.47369	2.61499	4.14019
CCG002072	exocyst complex component EXO70B1-like	1.99375	4.11063	4.15201	5.81842
CCG002073	exocyst complex component EXO70B1-like	3.40181	4.15371	3.29502	4.90378
CCG002076	ankyrin repeat-containing At5g02620 [Pyrus x bretschneideri]	0.808964	1.07442	0.715528	-0.827917
CCG002083	TMV resistance N-like	4.35296	0.969102	2.92032	2.84141
CCG002085	receptor kinase HERK 1	1.01314	0.676745	-0.279982	1.3101
CCG002087	receptor kinase HERK 1	0.863446	1.07722	0.873742	3.57644
CCG002097	---NA---	1.72122	0.708892	-0.795581	-0.571321
CCG002110	hypothetical protein JCGZ_21028	1.89933	1.16182	0.519743	1.87946
CCG002111	tRNA (cytosine-5-)-methyltransferase	-0.159859	-0.333502	-0.249564	-1.24455
CCG002113	YLS3-like [Malus domestica]	-0.424057	-2.27215	-2.88968	-4.33537
CCG002117	Amino acid permease 3	5.09475	2.12618	1.1454	2.07511
CCG002119	Amino acid permease 3	-0.557455	-0.341663	2.85706	2.17914
CCG002122	probable receptor kinase At1g11050	3.48696	3.50071	3.57815	3.75518
CCG002123	Tetratricopeptide repeat (TPR)-like superfamily isoform 1 [Theobroma cacao]	0.220674	0.398999	0.493773	1.51213
CCG002124	---NA---	0.109929	0.213967	0.847517	1.51843
CCG002127	amino-acid permease BAT1 homolog	1.52451	0.175364	4.06557	3.64287
CCG002128	amino-acid permease BAT1 homolog	0.569875	1.03521	1.99756	2.97544
CCG002129	1-aminocyclopropane-1-carboxylate oxidase 5	2.97291	2.84709	-4.56304	-3.67893
CCG002133	plastid transcriptionally active 6 [Arabidopsis thaliana]	0.556225	-0.396059	-1.16403	0.880029
CCG002137	glutathione S-transferase TCHQD-like isoform X1 [Eucalyptus grandis]	-0.28451	2.65475	2.53732	2.21025
CCG002138	probable receptor-like serine threonine- kinase At5g57670	-0.165586	0.339795	-1.10196	-0.559051
CCG002141	probable calcium-binding CML44	-0.547605	0.297719	0.385153	-1.03064
CCG002143	BTB POZ domain-containing At4g08455-like	0.0060986	-0.0205297	-0.822558	-1.14996
CCG002153	hypothetical protein VITISV_011927	6.07813	3.91833	-0.592764	-2.09114
CCG002154	uncharacterized serine-rich -like	0.266522	-1.36174	-3.40877	-4.95136
CCG002155	gibberellin 20 oxidase 2-like	-0.212169	-2.12955	-4.11495	-3.4361
CCG002161	hypothetical protein L484_012616 [Morus notabilis]	0.422629	-2.60737	-7.41219	-4.44037
CCG002162	ATP binding [Ricinus communis]	-0.1383	-0.911898	-1.07093	-0.937894
CCG002165	target of Myb 1-like [Pyrus x bretschneideri]	1.15062	0.915937	1.32968	1.60597
CCG002171	2-oxoisovalerate dehydrogenase subunit alpha mitochondrial-like	2.85739	6.76131	8.35752	7.07869
CCG002176	ACT domain-containing family [Populus trichocarpa]	-0.36356	-0.473083	0.455682	-1.24328
CCG002177	F-box SKP2A [Prunus mume]	0.137226	1.14048	1.39371	0.888145
CCG002178	chaperone dnaJ 10	-0.148699	-1.29697	-2.21917	-1.87682
CCG002179	serine carboxypeptidase-like 13	0.829947	0.369174	-1.30159	-0.857645
CCG002182	hypothetical protein POPTR_0005s20850g [Populus trichocarpa]	1.77418	1.95067	2.15885	3.19553
CCG002183	basic blue -like	0.0289893	-0.709343	-2.28972	-2.5279
CCG002185	scarecrow 1 [Populus euphratica]	-0.186258	1.14736	1.66856	0.723702
CCG002187	ribosome maturation SBDS	0.149618	0.531338	0.442187	1.10139
CCG002191	bidirectional sugar transporter SWEET1-like	0.684943	1.47218	1.30501	0.521627
CCG002199	dehydration-responsive element-binding 2A-like	1.53332	0.910606	-0.559085	0.408833
CCG002206	conserved hypothetical protein [Ricinus communis]	-0.737623	-0.632231	0.171114	-1.12743
CCG002211	M920_ARATH ame: Full=Uncharacterized mitochondrial g00920 ame: Full=ORF215b (mitochondrion) [Arabidopsis thaliana]	2.86053	2.94626	4.36066	3.95692
CCG002213	cytochrome oxidase subunit 1 (mitochondrion) [Capsicum annuum]	0.635123	0.611313	1.03996	1.53993
CCG002214	ATP synthase subunit partial (mitochondrion) [Fragaria vesca bracteata]	0.0562548	0.424545	1.0286	2.33978
CCG002252	CST complex subunit CTC1	0.303448	-0.945967	-2.05076	-0.881499
CCG002258	PITH domain-containing 1	0.0783356	0.624133	1.22471	0.411804
CCG002261	CST complex subunit CTC1	0.28665	-0.518142	-1.72279	-0.0861514
CCG002263	ferrochelatase- chloroplastic	0.939992	0.409002	0.252733	2.13331
CCG002264	Mitochondrial ATP synthase subunit G [Theobroma cacao]	-0.0542732	-1.11563	-1.18665	-1.17652
CCG002268	Uncharacterized protein isoform 1 [Theobroma cacao]	0.502286	0.295854	-1.0019	-0.574599
CCG002269	pollen-specific SF21-like	1.02717	-1.21075	-2.38374	-2.46141
CCG002270	abscisic acid receptor PYL2-like	-2.32462	-5.05851	-6.54119	-2.89554
CCG002271	abscisic acid receptor PYL2-like	-0.686151	-1.24273	-0.338716	-2.05449
CCG002273	K(+) efflux antiporter 6	-0.0173581	-0.615642	-0.777018	-1.1013
CCG002277	calcineurin B 10 isoform X1	0.0924355	2.06028	2.4032	0.653684
CCG002279	REVERSION-TO-ETHYLENE SENSITIVITY1 [Pyrus x bretschneideri]	0.451666	1.24006	0.644545	0.272358
CCG002280	PREDICTED: uncharacterized protein ycf36 isoform X1	2.17379	1.2836	0.524444	0.208055
CCG002281	serine threonine- kinase EDR1	0.428186	1.03482	0.984903	0.286377
CCG002282	glycine dehydrogenase (decarboxylating) mitochondrial	-0.0561377	-0.724995	-1.50966	-1.68098
CCG002284	hypothetical protein PRUPE_ppa019485mg [Prunus persica]	0.592587	2.53213	2.7803	-0.0921266
CCG002285	hypothetical protein POPTR_0006s24550g [Populus trichocarpa]	0.448927	4.00691	4.60968	1.79601
CCG002286	probable beta-1,3-galactosyltransferase 12	0.57062	-0.17527	-1.46468	-1.75884
CCG002287	zinc transporter chloroplastic-like isoform X1	0.309135	1.10257	0.6316	1.46609
CCG002288	glutamic acid-rich -like	-1.04963	-1.55218	-3.23344	-2.99562
CCG002290	NDR1-like [Glycine max]	-0.119437	-0.125251	-1.76552	-1.91221
CCG002292	delta(8)-fatty-acid desaturase-like	-0.0461481	-1.02219	-1.59138	-1.68398
CCG002295	zinc finger NUTCRACKER-like	-0.482416	-1.78457	-1.37888	-1.28926
CCG002299	hypothetical protein F383_12354	-2.38944	-2.40836	-1.67288	-1.06833
CCG002301	Heat shock transcription factor A2 isoform 1 [Theobroma cacao]	-0.152048	0.0878204	-0.338204	-1.31641
CCG002302	cytochrome P450 711A1-like	-0.480411	-0.240342	1.10969	0.91431
CCG002303	IQ-DOMAIN 1	-0.78753	-0.947664	-2.31362	-1.27304
CCG002304	calmodulin-binding family [Populus trichocarpa]	1.16026	0.664237	1.10369	0.331366
CCG002305	graves disease carrier [Cucumis melo]	1.23882	0.309621	0.514671	1.35234
CCG002314	leucine-rich repeat extensin 3	-0.480518	-0.258588	-1.23421	-2.22878
CCG002318	---NA---	2.87351	1.66163	1.41046	2.02798
CCG002319	nuclease HARBI1	2.07323	1.73662	1.58587	2.56891
CCG002320	abscisic insensitive 1B [Populus tremula]	0.0379514	-1.13519	-1.07981	-0.303847
CCG002321	serine threonine- kinase tricorner	0.124936	-1.68871	-4.59657	-2.839
CCG002323	Aminopeptidase M1 isoform 1 [Theobroma cacao]	0.335117	0.51314	-0.124818	-1.44119
CCG002327	Uncharacterized protein TCM_037337 [Theobroma cacao]	-0.590174	-0.0706611	0.622488	-1.15722
CCG002329	probable WRKY transcription factor 50	-0.427982	2.67226	2.44926	1.58624
CCG002330	methyltransferase NSUN5	0.0220816	0.535544	0.598368	1.75169
CCG002332	60S ribosomal L13 [Medicago truncatula]	-0.0549076	-0.496665	-1.25214	-0.1342
CCG002333	solute carrier family 25 member 44-like	-0.68166	0.471049	0.933152	-1.25133
CCG002337	carbon-nitrogen hydrolase family [Populus trichocarpa]	-0.0912257	-0.82734	-0.879155	-1.12887
CCG002339	[Ricinus communis]	2.82464	1.90096	2.08407	2.67125
CCG002342	hypothetical protein PRUPE_ppa020556mg [Prunus persica]	0.38861	-0.963804	-8.02183	-3.66128
CCG002347	retrovirus-related Pol poly from transposon 297	0.247928	-1.68543	-6.86529	-1.90017
CCG002348	transcription [Ricinus communis]	-0.862152	-2.93595	-3.47393	-3.2513
CCG002349	Heat stress transcription factor A- [Theobroma cacao]	0.79779	2.3402	2.9878	3.84626
CCG002352	MIZU-KUSSEI 1-like	-1.01022	-0.63862	-2.52385	-3.9553
CCG002353	transcription factor MYB44-like	1.18237	0.664038	0.754232	-0.208914
CCG002354	early nodulin-55-2-like	3.66756	3.82203	4.0004	3.45686
CCG002356	mitogen-activated kinase kinase kinase YODA-like isoform X1	1.70343	0.742098	0.967918	0.800192
CCG002357	F-box SKIP23-like	1.32899	3.13109	3.46449	1.37005
CCG002358	probable disease resistance At4g33300	0.443275	0.81759	1.34338	0.433013
CCG002361	NRT1 PTR FAMILY -like	0.0951926	-1.01896	-3.00507	-3.76235
CCG002362	thylakoidal processing peptidase 2 [Morus notabilis]	0.526104	0.992472	1.13503	0.393359
CCG002364	lysine histidine transporter-like 8	0.122323	-1.4828	-4.28031	-3.41132
CCG002365	dof zinc finger	0.931051	1.19665	0.764734	0.279266
CCG002368	ent-kaurene chloroplastic-like	-0.317446	-0.528409	-0.488136	-2.89898
CCG002370	Pyridoxal phosphate-dependent transferases superfamily [Theobroma cacao]	-0.16965	-1.27706	-2.4101	-0.590377
CCG002374	dof zinc finger	1.12912	0.589396	0.117021	-0.158674
CCG002376	bicaudal C-1-B [Morus notabilis]	-1.6218	0.703036	1.77024	-0.843285
CCG002377	O-fucosyltransferase family isoform 2 [Theobroma cacao]	-0.0371415	-0.46643	-0.725593	-1.11972
CCG002389	aldose 1- [Ricinus communis]	-0.121242	0.2801	1.00981	-0.0307806
CCG002392	RNA-binding CRS1 domain [Theobroma cacao]	-0.117903	-0.99179	-1.48456	0.299282
CCG002393	uncharacterized CRM domain-containing chloroplastic	-0.321575	-0.923628	-1.72725	0.408443
CCG002396	glucuronokinase 1	0.704002	2.37366	2.04713	0.0190775
CCG002398	tRNA-pseudouridine [Ricinus communis]	0.0830823	-0.684236	-1.77834	-0.307471
CCG002403	S-adenosyl-L-methionine-dependent methyltransferases superfamily isoform 1 [Theobroma cacao]	0.10541	-0.87772	-1.36758	-1.16051
CCG002404	RING domain ligase2 isoform 1 [Theobroma cacao]	0.0597203	1.21454	1.28172	0.636027
CCG002405	hypothetical protein POPTR_0001s35670g [Populus trichocarpa]	-0.399073	0.635296	1.06148	0.377145
CCG002406	pentatricopeptide repeat-containing mitochondrial	-0.138746	-1.27507	-2.19395	-2.16692
CCG002408	pentatricopeptide repeat-containing mitochondrial	0.107823	-0.594841	-1.70781	-0.269228
CCG002415	hypothetical protein POPTR_0001s35870g [Populus trichocarpa]	0.176133	0.154285	-1.03667	-3.02219
CCG002416	hypothetical protein POPTR_0001s35870g [Populus trichocarpa]	0.11891	0.14251	-1.17357	-2.70087
CCG002417	DUF1713 domain [Medicago truncatula]	-0.610757	-0.827157	-0.92526	-1.33763
CCG002419	glycerol-3-phosphate dehydrogenase [NAD(+)]	0.211798	-0.539588	-2.83764	-2.23908
CCG002421	pectate partial [Vitis vinifera]	-1.15525	-3.49467	-3.15609	-1.66761
CCG002422	CHLOROPLAST IMPORT APPARATUS 2 [Morus notabilis]	-0.357013	-0.548863	0.684112	-2.35062
CCG002423	class I heat shock -like	-0.436029	2.98674	5.48666	4.0773
CCG002427	phragmoplast-associated kinesin-related 2 [Populus trichocarpa]	-0.257259	-2.19855	-3.98329	-3.36674
CCG002429	Transducin WD40 repeat-like superfamily isoform 1 [Theobroma cacao]	-0.273425	-0.381358	-1.36108	-0.878334
CCG002430	long-chain-alcohol oxidase FAO1	-0.562833	-0.177828	-0.266639	-1.22083
CCG002431	phosphate transporter PHO1-like isoform X1	-0.597723	-1.62651	-0.363081	-0.759082
CCG002436	Embryo sac development arrest [Theobroma cacao]	0.703498	0.242456	0.4036	1.5587
CCG002438	No pollen germination related 2 isoform 1 [Theobroma cacao]	0.959601	1.13004	1.53379	2.41704
CCG002439	50S ribosomal chloroplastic	-0.0661062	-0.757058	-0.818226	-1.23727
CCG002441	DAG chloroplastic-like	0.00969786	-0.494281	-1.11615	-0.0843708
CCG002442	NRT1 PTR FAMILY -like	-0.238051	-1.45904	-2.0731	-3.20066
CCG002443	NRT1 PTR FAMILY -like	0.168478	-4.39004	-2.39099	-3.09846
CCG002453	wall-associated receptor kinase-like 22	1.12269	1.46186	1.84231	1.74978
CCG002455	VQ motif-containing isoform 1 [Theobroma cacao]	0.709564	1.34059	1.82328	1.65634
CCG002456	phosphopentothenoylcysteine [Ricinus communis]	0.0536139	0.689746	1.33962	1.54286
CCG002457	mitochondrial carnitine acylcarnitine carrier [Cucumis melo]	-0.115802	-0.479546	-1.32937	-0.331445
CCG002458	PREDICTED: uncharacterized protein LOC104246313	-0.201591	0.277904	1.11976	0.141368
CCG002467	DNA-binding ESCAROLA	-1.32324	-0.728082	0.234069	0.2829
CCG002472	salicylate carboxymethyltransferase	3.47083	1.53158	-0.0466958	-0.289983
CCG002474	jasmonate O-methyltransferase	1.52624	2.04037	-0.0458626	1.32271
CCG002476	---NA---	-1.01869	-2.43217	-2.13648	-1.68854
CCG002477	GPI ethanolamine phosphate transferase 2	-0.602025	-1.0744	-0.434404	-0.150777
CCG002482	mechanosensitive ion channel chloroplastic [Fragaria vesca vesca]	1.25496	1.5236	1.32246	1.6198
CCG002484	bHLH family [Populus trichocarpa]	-0.115838	-0.294352	-0.493727	-2.08089
CCG002485	PREDICTED: uncharacterized protein LOC101301139	0.371256	1.45353	2.26525	1.78017
CCG002487	Nicotinamidase 1 isoform 1 [Theobroma cacao]	0.202269	0.601137	0.987466	1.1865
CCG002490	probably inactive leucine-rich repeat receptor kinase At5g48380	3.20416	-0.389941	-2.21038	0.274996
CCG002491	nucleobase-ascorbate transporter 11	-0.442998	-0.743836	-1.91458	-2.56583
CCG002492	U-box domain-containing 50	2.23743	1.44685	1.63258	0.774336
CCG002493	AP2-like ethylene-responsive transcription factor AIL6	0.721133	2.24045	2.19134	0.52572
CCG002495	receptor-like cytosolic serine threonine- kinase RBK1	0.241092	0.495802	-0.093395	1.02418
CCG002497	UDP-rhamnose:rhamnosyltransferase 1	-0.220462	-0.0457386	-0.501861	-1.29966
CCG002498	UDP-glycosyltransferase 91A1-like	0.61461	-1.76206	-1.31911	-0.623944
CCG002505	RNA methyltransferase 1B	-0.0805325	-0.180252	-0.968205	-1.01964
CCG002507	Di-glucose binding with Kinesin motor domain isoform 1 [Theobroma cacao]	-0.436642	-2.87442	-4.30159	-3.65847
CCG002509	probable mannitol dehydrogenase	-2.23923	6.44444	7.19149	5.91438
CCG002514	probable mannitol dehydrogenase	1.63918	4.48591	3.23606	2.42935
CCG002516	8-hydroxygeraniol dehydrogenase-like	1.02632	-0.264061	-0.751386	-1.29281
CCG002517	8-hydroxygeraniol dehydrogenase-like	0.619422	-1.13711	-2.60214	-1.93219
CCG002520	8-hydroxygeraniol dehydrogenase-like	NA	4.24128	6.2342	6.54658
CCG002521	8-hydroxygeraniol dehydrogenase-like	0.0140437	1.53882	1.04028	0.510064
CCG002522	8-hydroxygeraniol dehydrogenase-like	-0.341975	1.26148	0.79378	0.0178896
CCG002524	8-hydroxygeraniol dehydrogenase-like	-1.67185	-2.28951	-1.21322	-1.28379
CCG002527	probable rhamnogalacturonate lyase B	-0.647645	-1.15681	0.832517	0.0943137
CCG002536	laccase-14-like	-1.21349	-5.31189	-8.37283	-5.51049
CCG002537	laccase-9	-0.916117	-3.6184	-4.51201	-3.20831
CCG002538	laccase-15-like isoform X1	1.08596	9.08156	9.53026	7.29019
CCG002539	cytochrome P450 78A7-like	-0.564438	0.136763	0.188532	-2.76838
CCG002544	uncharacterized aarF domain-containing kinase chloroplastic	-0.36745	-1.26923	-1.34579	0.173437
CCG002545	shikimate kinase chloroplastic-like	-0.210748	0.291958	0.845015	1.11413
CCG002547	no apical meristem family [Populus trichocarpa]	0.655242	1.08821	1.21481	1.08569
CCG002548	sphinganine C(4)-monooxygenase 1-like	-0.171719	-0.871911	-1.80098	-0.552077
CCG002549	HSP20-like chaperones superfamily [Theobroma cacao]	0.157324	0.614826	0.504507	1.16512
CCG002553	cleavage stimulation factor subunit 77 isoform X1	-0.223411	-0.355279	0.404549	1.07392
CCG002554	ras-related Rab7	-0.0684467	-0.4611	-1.03966	-0.813694
CCG002555	[Ricinus communis]	-0.811388	-4.16048	-8.14406	-5.11164
CCG002556	polyadenylate-binding 3-like	0.0658866	0.0391708	-0.532227	1.24848
CCG002557	UPF0544 C5orf45 homolog	0.224274	-0.714308	-2.02659	-2.51369
CCG002559	DEAD-box ATP-dependent RNA helicase 39-like	0.0148002	-0.244602	-1.2162	-0.0279594
CCG002562	Nucleolar [Theobroma cacao]	0.224969	-0.110928	-1.75089	-4.11014
CCG002564	probable LRR receptor-like serine threonine- kinase At1g34110	-0.574909	-0.66207	-1.96516	-1.97142
CCG002567	dehydrogenase reductase SDR family member 12	-0.328534	-1.04609	-0.334097	-0.108275
CCG002568	probable choline kinase 1 isoform X1	1.17978	1.94246	2.05258	1.03889
CCG002569	carboxypeptidase D	0.259659	0.734435	1.02084	0.195914
CCG002570	GIGANTEA [Jatropha curcas]	0.622201	1.39076	0.47511	-0.997474
CCG002571	40S ribosomal S18 [Nelumbo nucifera]	-0.0752616	-0.858819	-1.32816	-0.138862
CCG002574	ONE-HELIX 2 [Populus trichocarpa]	0.0324361	0.749314	1.30031	0.317202
CCG002575	hypothetical protein PRUPE_ppa022080mg [Prunus persica]	0.41401	0.493262	1.25562	0.32976
CCG002579	Encodes a root meristem growth Belongs to a family of functionally redundant ous peptides that are [Theobroma cacao]	1.49316	0.974613	-2.68484	-5.7917
CCG002580	peroxidase 12-like	0.144668	1.99306	2.60202	2.62234
CCG002592	glutamine synthetase leaf chloroplastic	0.242202	-0.829034	-1.25122	-2.37531
CCG002593	AWPM-19 [Arabidopsis thaliana]	0.0272605	-0.212518	-1.62276	-3.68091
CCG002596	BSD domain-containing 1-like	0.264503	1.87889	2.07704	1.55871
CCG002601	probable phosphatase 2C 35	0.139301	0.120266	-0.829309	-2.0127
CCG002610	DNAse I-like superfamily [Theobroma cacao]	0.309255	-0.196303	0.249273	1.30621
CCG002611	---NA---	-1.5436	-2.77549	-4.10876	-4.2832
CCG002612	transmembrane [Medicago truncatula]	0.0618922	1.76536	0.445778	0.33379
CCG002614	hypothetical protein L484_011288 [Morus notabilis]	0.213664	0.497306	1.0708	-0.0414783
CCG002616	glyoxylate hydroxypyruvate reductase HPR3-like [Populus euphratica]	-0.367559	-1.45099	-2.08808	-1.96139
CCG002617	probable carboxylesterase 8	-0.990239	-2.53287	-2.34077	-1.80907
CCG002618	probable carboxylesterase 9	-1.10722	-2.27314	-2.24946	-2.72602
CCG002623	geraniol 8-hydroxylase-like	0.333621	3.8681	1.94254	-0.514965
CCG002625	geraniol 8-hydroxylase-like	0.313993	1.53109	3.86577	3.85566
CCG002628	cytochrome P450 704C1-like	-0.251914	0.259252	1.23638	0.290183
CCG002629	cytochrome P450 family [Populus trichocarpa]	-0.846921	-0.61911	1.16838	-0.314997
CCG002636	high mobility group B 3-like	-0.787573	-0.366576	-0.0262804	-1.09876
CCG002637	Transducin WD40 repeat-like superfamily isoform 1 [Theobroma cacao]	1.85551	3.02461	2.17805	0.840815
CCG002638	RB1-inducible coiled-coil isoform 1 [Theobroma cacao]	-0.14588	-0.830995	-1.55361	-1.51387
CCG002640	WUSCHEL-related homeobox 13-like	-0.127725	1.00415	0.840222	0.240103
CCG002644	DNA mismatch repair MLH3 isoform X1 [Vitis vinifera]	-0.135011	0.625315	1.11326	1.09867
CCG002645	transcriptional regulator ATRX homolog isoform X1 [Cicer arietinum]	0.172973	0.761709	1.08517	0.896398
CCG002646	---NA---	2.69902	1.0276	0.534208	1.28363
CCG002648	proton-coupled amino acid transporter 3-like	0.331715	1.20219	1.04527	1.09272
CCG002657	auxin efflux carrier family [Populus trichocarpa]	-0.44016	2.15497	1.69164	1.3658
CCG002660	MLO 8	0.28152	1.28644	1.5847	0.351036
CCG002661	RING-H2 finger ATL80-like	-0.457875	1.50037	1.47532	0.0638514
CCG002665	mitochondrial phosphate carrier mitochondrial-like	-0.458636	-1.46865	-1.72439	0.33428
CCG002666	plant intracellular Ras-group-related LRR 4-like [Nelumbo nucifera]	-0.270402	-0.966501	-0.795305	-1.04606
CCG002669	3-hydroxy-3-methylglutaryl coenzyme A reductase	-0.504703	-1.02967	-1.20922	-1.98224
CCG002671	conserved hypothetical protein [Ricinus communis]	0.884327	1.45918	1.11299	1.77345
CCG002675	Myb domain 42 [Theobroma cacao]	-0.442383	0.798399	1.00701	-1.85532
CCG002676	HSP70-interacting 1 isoform 1 [Theobroma cacao]	-0.0687863	-0.338286	-0.108751	-1.53672
CCG002677	lipid transfer VAS	1.20713	2.68685	1.95873	2.82802
CCG002679	PREDICTED: uncharacterized protein LOC104825734	-2.13195	1.03194	2.36019	1.35818
CCG002680	pentatricopeptide repeat-containing mitochondrial [Populus euphratica]	-0.692585	-1.08297	-0.400702	-1.13665
CCG002686	probable aldo-keto reductase 2	-0.586032	0.717331	1.72726	0.90104
CCG002694	probable UDP-N-acetylglucosamine--peptide N-acetylglucosaminyltransferase SEC	0.726562	1.1849	0.228376	0.777219
CCG002695	40S ribosomal S8-like	-0.113722	-0.470077	-1.33007	-0.19981
CCG002699	Nucleic acid-binding s isoform 2 [Theobroma cacao]	-0.5432	-0.869998	-2.02591	-1.09924
CCG002702	dentin sialophospho	-0.785393	-0.820346	-1.30757	-1.57422
CCG002704	vacuolar sorting-associated 13A isoform X15 [Nelumbo nucifera]	-0.0995964	1.32308	0.825377	0.847288
CCG002707	brassinosteroid-regulated family [Populus trichocarpa]	-0.521607	-4.94843	-5.0745	-8.28402
CCG002709	PREDICTED: uncharacterized protein LOC103411565 isoform X1	-0.0219945	-1.65725	-3.27106	-3.08918
CCG002711	crocetin chloroplastic-like	0.306662	2.7832	-0.675192	-3.97952
CCG002713	ENHANCED DISEASE RESISTANCE 2 [Fragaria vesca vesca]	-0.073705	-1.17948	-2.91773	-2.69726
CCG002715	transmembrane 230-like	0.179748	1.13276	0.702369	0.601359
CCG002717	SNF1-related kinase catalytic subunit alpha KIN10 isoform X1 [Malus domestica]	-0.044732	0.49204	1.02235	0.126666
CCG002721	hypothetical protein L484_009139 [Morus notabilis]	-0.61681	-0.130525	-1.42589	-4.44304
CCG002728	benzyl alcohol O-benzoyltransferase-like	-1.00263	-4.6592	-4.01991	-3.02191
CCG002729	benzyl alcohol O-benzoyltransferase-like	-2.18049	5.19487	1.03756	-0.611427
CCG002730	benzyl alcohol O-benzoyltransferase	-1.78702	-0.677377	0.433342	-0.0635471
CCG002731	Benzoyl coenzyme A: Benzyl alcohol benzoyl transferase [Theobroma cacao]	-1.68449	-0.761215	-1.9357	-3.67715
CCG002733	RNA polymerase sigma factor [Ricinus communis]	-0.838583	-2.25389	-1.18356	-2.1025
CCG002735	maltose excess chloroplastic-like	0.190616	-0.611359	-2.28243	-1.26458
CCG002736	maltose excess chloroplastic-like	0.129082	-0.768108	-1.95686	-1.18993
CCG002739	probable folate-biopterin transporter 7	0.23473	-1.38234	-2.3986	-1.22298
CCG002740	probable folate-biopterin transporter 7 [Eucalyptus grandis]	0.32672	-1.32745	-2.08035	-0.96661
CCG002742	cytochrome [Ricinus communis]	-0.488512	-0.886774	0.384694	1.91194
CCG002743	ankyrin repeat-containing At3g12360-like [Vitis vinifera]	-0.362455	-1.18837	-1.00254	-0.733376
CCG002751	[Theobroma cacao]	0.135944	-0.796593	-2.0962	-0.847652
CCG002752	Expression of the gene is downregulated in the presence of [Theobroma cacao]	1.21977	0.870582	0.774556	2.72894
CCG002753	hypothetical protein CICLE_v10008166mg [Citrus clementina]	0.337299	0.986824	0.936103	1.29015
CCG002757	NEP1-interacting -like 1	-1.43296	1.88577	1.50595	-2.91889
CCG002759	translation factor SUI1 [Aeschynomene evenia]	2.85962	2.41565	1.24038	0.843784
CCG002762	[Ricinus communis]	-0.0606075	0.162778	-0.573004	-1.5898
CCG002763	NADH:ubiquinone subunit isoform 1 [Theobroma cacao]	-0.58243	-0.827774	-1.08098	-0.212159
CCG002766	---NA---	0.860443	1.24247	1.23214	2.09488
CCG002767	nucleolin-like [Malus domestica]	-0.012242	2.58111	2.98458	4.10958
CCG002768	heterodimeric geranylgeranyl pyrophosphate synthase small chloroplastic-like	0.272044	-0.265188	-1.13271	-0.900103
CCG002771	polyadenylate-binding RBP45C-like	3.18769	0.107081	-0.127638	0.922878
CCG002774	hypothetical protein L484_017832 [Morus notabilis]	-0.419829	-1.08277	-0.521465	1.01795
CCG002783	---NA---	3.37998	0.599918	1.06377	0.608831
CCG002784	TMV resistance N-like	2.39032	0.686126	0.502846	0.753287
CCG002788	serine threonine- kinase PBS1-like	1.32853	0.0480785	0.748377	0.864112
CCG002790	microtubule-associated TORTIFOLIA1	0.0843781	-1.10793	-3.3555	-1.46594
CCG002793	Apolipo D	-0.406374	-0.8665	-0.971665	-1.26134
CCG002794	probable metal-nicotianamine transporter YSL7	8.0508	5.76168	2.89441	4.90277
CCG002796	septum-promoting GTP-binding 1-like	0.828537	2.94481	3.26049	1.78889
CCG002797	F-box At3g62230-like	2.69051	5.26027	5.52013	3.28942
CCG002804	CTD small phosphatase [Theobroma cacao]	-1.68384	-2.35043	-4.28111	-7.09888
CCG002805	electron transfer flavo subunit mitochondrial	-0.118749	1.63614	1.78558	0.595433
CCG002806	disulfide-isomerase 5-3	-0.017411	0.0451097	-1.06741	-0.849564
CCG002807	early nodulin 1	0.0802948	-0.136275	-1.51636	-2.8085
CCG002816	LRR receptor-like serine threonine- kinase FEI 1 [Populus euphratica]	-0.168776	-0.901622	-1.02593	-0.489972
CCG002819	probable calcium-binding CML23	1.15027	1.17503	0.438544	0.826863
CCG002820	probable fructokinase-4	0.203759	0.390514	0.23745	-1.01733
CCG002821	proline-rich receptor kinase PERK13-like	0.0643987	-0.305867	-0.706987	-1.43379
CCG002823	benzyl alcohol O-benzoyltransferase	3.08385	2.09146	-0.184545	0.241621
CCG002824	transcription factor bHLH086	-0.477214	-0.21401	-1.53338	-2.77206
CCG002825	U-box domain-containing 4-like	-0.152925	1.36751	2.1376	0.644281
CCG002829	protease Do-like mitochondrial	0.143528	-0.426196	-2.10253	-0.287326
CCG002830	nutrient [Ricinus communis]	-1.61914	-4.79999	-4.81774	-4.90382
CCG002833	Plastid movement impaired 2 [Theobroma cacao]	0.243297	2.08097	2.20998	4.34982
CCG002834	transcription repressor MYB6-like	-1.15143	-0.541394	0.0507497	-0.527247
CCG002841	heavy metal-associated isoprenylated plant 26	-0.617973	-2.86826	-2.97776	-3.68006
CCG002842	isoform 2 [Theobroma cacao]	-0.161316	-0.63869	-1.1117	-0.621675
CCG002849	PREDICTED: uncharacterized protein LOC101208221 [Cucumis sativus]	0.0834508	-0.249133	-0.488722	-1.6938
CCG002850	hypothetical protein CICLE_v10013026mg [Citrus clementina]	2.76919	2.13958	2.5278	2.03052
CCG002851	hypothetical protein VITISV_024715	1.2965	1.46239	0.629321	-0.0374787
CCG002853	Auxin efflux carrier family isoform 1 [Theobroma cacao]	-1.34941	-2.49774	-3.07126	-3.22046
CCG002855	E3 ubiquitin- ligase MARCH2-like [Malus domestica]	0.115147	-0.439935	-2.16279	-2.23561
CCG002859	elongation factor mitochondrial	-0.25368	-1.00223	-1.32708	-0.114501
CCG002864	2-hydroxyacyl- lyase	0.0516583	2.19525	0.767464	1.25948
CCG002865	2-hydroxyacyl- lyase	0.175391	2.24849	0.953009	1.51255
CCG002866	2-hydroxyacyl- lyase	-0.0688659	2.24591	0.950393	1.89515
CCG002867	2-hydroxyacyl- lyase	0.118054	2.17198	0.735741	1.26407
CCG002871	zinc finger CCCH domain-containing 14	0.273286	-0.651114	-3.74576	-7.5383
CCG002872	PREDICTED: uncharacterized protein LOC104881559	1.3466	1.35288	1.23062	2.43517
CCG002874	MADS-box family [Populus trichocarpa]	-0.0912651	-1.49402	-1.93399	-0.298626
CCG002876	leucine-rich repeat receptor kinase EXS-like isoform X2	0.49557	0.825145	0.714787	2.05533
CCG002877	lipid phosphate phosphatase chloroplastic isoform X2 [Jatropha curcas]	0.655689	1.99863	1.8925	1.98526
CCG002884	peroxidase 5-like	1.93665	0.701945	0.280707	-0.195161
CCG002887	peroxidase 5-like	1.35785	0.56467	0.416305	0.205889
CCG002890	peroxidase 5-like	1.33899	0.895102	0.524286	0.141357
CCG002892	peroxidase 5-like	1.47219	0.975777	0.407221	0.288104
CCG002894	peroxidase 5-like	1.71862	6.40003	6.46745	7.64954
CCG002895	peroxidase 5-like	0.70945	5.37311	6.0938	7.18867
CCG002896	peroxidase 5-like	1.56162	5.90373	6.00698	7.12773
CCG002897	peroxidase 5-like	2.3445	6.54681	6.49413	7.95969
CCG002898	ATP-citrate synthase alpha chain 2	1.54627	5.61747	5.43622	6.62818
CCG002899	peroxidase 5-like	2.42634	5.34052	5.09633	6.23495
CCG002900	ATP-citrate synthase alpha chain 2	-0.0825487	-0.917715	-1.34587	-1.25186
CCG002904	shaggy-related kinase alpha [Populus euphratica]	0.173212	0.703007	1.01078	0.990219
CCG002905	ATP-binding cassette transporter [Selaginella moellendorffii]	-0.88715	-0.814202	-1.40481	-1.12019
CCG002907	polygalacturonase At1g48100-like	-0.544029	0.183132	1.54071	0.346062
CCG002908	Peptidase pyroglutamyl peptidase I-like isoform 1 [Theobroma cacao]	-0.082313	1.45019	1.38894	-0.721195
CCG002909	glucose-6-phosphate 1-dehydrogenase chloroplastic	0.626432	0.578063	1.73373	0.167592
CCG002913	GDSL esterase lipase At1g09390-like	0.0108633	-1.4388	-2.26851	-2.70891
CCG002914	WAT1-related At1g09380	-0.299402	0.169007	3.66248	-0.511285
CCG002918	nitrogen regulatory P-II homolog	-0.179712	-0.947661	-1.23907	-0.862059
CCG002922	probable cinnamyl alcohol dehydrogenase 1	-0.273813	3.26595	2.67688	1.54535
CCG002923	Cinnamyl-alcohol dehydrogenase isoform 1 [Theobroma cacao]	0.0331234	2.74705	2.39255	1.69287
CCG002925	boron transporter 1-like	-1.59417	-2.35164	-3.26471	-1.98928
CCG002927	carboxylic ester hydrolase [Arabidopsis lyrata lyrata]	0.0670325	-0.226976	-0.695095	-1.48786
CCG002928	boron transporter 2	-0.124385	-2.97402	-3.64277	-2.496
CCG002929	NIM1-INTERACTING 1-like [Populus euphratica]	-0.561562	-0.449538	-2.05836	-1.36403
CCG002931	NIM1-INTERACTING 1	-1.7329	-1.44529	-4.05366	-4.15912
CCG002934	polygalacturonase At1g48100-like	2.36634	-0.774192	-2.97941	-1.47448
CCG002935	Shaggy-related kinase 11 isoform 1 [Theobroma cacao]	0.92313	1.86238	1.71863	3.26793
CCG002936	probable phosphatase 2C 49	1.53033	1.17404	1.08348	0.348935
CCG002937	Polyketide cyclase dehydrase and lipid transport superfamily [Theobroma cacao]	-0.496277	-1.46962	-1.46896	-1.45587
CCG002939	Desmoglein-1-beta [Gossypium arboreum]	-0.144109	-0.709404	-0.279149	-1.15649
CCG002940	rolling stone-like isoform X2	0.26451	0.53946	1.08321	0.922249
CCG002942	---NA---	-0.116218	1.421	2.24387	0.0296984
CCG002944	Adipose-regulatory [Theobroma cacao]	-1.07129	2.64987	2.65673	-1.25307
CCG002946	probable WRKY transcription factor 2	-0.939143	1.04878	2.24757	1.15792
CCG002949	probable tyrosine- phosphatase At1g05000	1.44226	1.83744	0.834243	1.56159
CCG002950	photosystem I reaction center subunit chloroplastic	-0.300411	-0.218255	0.272984	-2.10256
CCG002951	CRIB domain-containing RIC4	-0.152894	-0.355356	-3.50837	-5.3552
CCG002954	---NA---	0.0393334	0.153647	1.15664	1.43783
CCG002955	zinc finger CCCH domain-containing ZFN-like	-0.0678454	0.148518	0.961691	1.15712
CCG002956	lysine ketoglutarate reductase trans-splicing	-0.534477	-1.18145	-1.30321	-1.75713
CCG002963	Transcription factor isoform 1 [Theobroma cacao]	-1.67319	1.54207	3.53038	2.48496
CCG002972	probable receptor kinase At1g67000	1.03674	-0.345519	0.103841	0.423846
CCG002980	aminotransferase ALD1-like	0.0905823	3.19608	2.8986	1.25884
CCG002981	hypothetical protein POPTR_0005s16430g [Populus trichocarpa]	2.28784	3.28818	3.16669	2.33202
CCG002982	hypothetical protein POPTR_0005s16430g [Populus trichocarpa]	3.36907	4.8644	4.45089	4.83586
CCG002983	golgin subfamily B member 1-like [Populus euphratica]	-0.13126	-0.880015	-1.5558	-1.08641
CCG002987	membrane-anchored ubiquitin-fold 3-like	-0.505419	-0.678076	-0.914188	-1.24329
CCG002988	F-box kelch-repeat At1g22040-like [Malus domestica]	0.701447	1.15152	0.872935	1.04279
CCG002989	Structural constituent of [Theobroma cacao]	-0.292529	-0.013197	-3.39573	-6.6303
CCG002990	60S ribosomal L30 [Populus trichocarpa]	-0.000464031	-0.723291	-1.82787	-0.163474
CCG002991	aspartic ase 1 isoform X2	0.666636	0.544662	-2.271	-2.58242
CCG002992	heavy metal-associated isoprenylated plant 26-like	1.48279	2.05626	-0.0546235	-1.29282
CCG002994	hypothetical protein L484_021529 [Morus notabilis]	2.78412	NA	1.91157	6.1212
CCG002999	cullin 1 [Populus trichocarpa]	-1.2118	-0.325489	1.0421	0.274967
CCG003001	sulfate transporter -like [Prunus mume]	-0.540332	-0.187371	0.855212	1.26444
CCG003006	senescence-associated family [Populus trichocarpa]	-1.54504	-3.48179	-3.33201	-2.49237
CCG003007	glucan 1,3-beta-glucosidase A-like	0.29123	3.94896	5.38903	3.48037
CCG003008	glucan 1,3-beta-glucosidase A-like	1.71808	3.94522	5.15359	4.01555
CCG003009	pollen-specific C13-like [Malus domestica]	0.460712	-1.42695	-3.34903	-2.8524
CCG003010	phosphoglycerate mutase-like	0.375091	0.994407	0.683496	2.76213
CCG003013	metallophosphoesterase 1-like	-0.0498366	0.762413	1.17476	-0.313774
CCG003014	probable beta-D-xylosidase 7	0.0485611	-0.950328	-2.75788	-3.42923
CCG003017	ethylene-responsive transcription factor RAP2-4	1.39383	0.689067	0.411533	0.521132
CCG003027	transmembrane protein, putative	NA	2.89575	6.23159	6.49297
CCG003028	PREDICTED: uncharacterized protein LOC104450287 isoform X1 [Eucalyptus grandis]	-1.37075	-2.21039	0.508489	0.927993
CCG003033	cell division cycle cofactor of APC complex-like	-0.553461	-3.02652	-5.04712	-4.09669
CCG003036	pathogenesis-related PRB1-3-like	1.34205	-0.875476	-3.87795	-4.57006
CCG003038	dynein heavy chain PF11_0240	-0.376743	-3.12961	-5.9816	-3.29356
CCG003041	(-)-alpha-terpineol synthase	1.72539	1.022	1.04414	2.28527
CCG003042	terpene synthase cyclase family [Populus trichocarpa]	1.52611	2.18165	1.65437	2.57014
CCG003044	gibberellin 20-oxidase family [Populus trichocarpa]	-2.20811	-1.97745	-0.895531	-2.34943
CCG003045	Copine family isoform 1 [Theobroma cacao]	0.421148	1.18388	0.956909	1.49672
CCG003046	DNA polymerase delta catalytic subunit	0.204047	-1.22732	-2.15553	-0.203019
CCG003047	---NA---	-0.22535	0.795195	1.68364	-0.0968312
CCG003049	Membrane [Theobroma cacao]	-1.01458	-4.32905	-4.93174	-3.21556
CCG003051	polypeptide with a gag-like domain	-0.142474	-0.885698	-1.5567	0.24682
CCG003055	DNA topoisomerase 3-alpha isoform X2	0.0577235	-0.632743	-1.49937	-1.61087
CCG003057	farnesylcysteine lyase	-0.453758	0.956491	1.16814	-1.30493
CCG003058	Farnesylcysteine lyase	-0.453312	0.927145	1.17586	-0.987743
CCG003064	amino-acid permease BAT1 homolog	1.42908	0.826245	1.50897	2.27886
CCG003065	lipase-like PAD4	0.749698	1.40648	1.86002	1.74036
CCG003066	lipase-like PAD4 [Eucalyptus grandis]	0.756383	1.57626	2.07078	1.98936
CCG003067	ultraviolet-B receptor UVR8	-0.0904154	-0.470884	-1.47613	-1.07333
CCG003069	Amino acid permease 2 isoform 1 [Theobroma cacao]	-1.5807	2.06954	-0.991755	-4.40102
CCG003072	beta-galactosidase 10	0.677382	-1.06277	-3.27739	-2.09796
CCG003073	---NA---	0.462414	-1.21116	-3.73905	-2.02853
CCG003074	beta-galactosidase 6 isoform X1	0.00492906	-0.53123	-1.72157	-0.857425
CCG003077	NAC domain-containing 2-like	2.79114	3.83398	3.66011	3.46103
CCG003078	aspartic ase Asp1-like	0.256378	0.362815	-0.620755	-3.98917
CCG003080	probable GPI-anchored adhesin PGA55	2.3563	1.76161	1.29603	0.606634
CCG003082	filament-like plant isoform X1 [Nelumbo nucifera]	-0.115541	0.0322193	-0.341207	-1.08204
CCG003085	cyclin-dependent kinase E-1-like [Pyrus x bretschneideri]	-0.324348	0.533869	1.05298	0.661949
CCG003089	sphingosine kinase B	-0.112435	-1.44742	-2.05493	-0.985708
CCG003096	peroxisome biogenesis 1 isoform X1	0.0120845	0.550329	1.02705	0.270031
CCG003097	60S ribosomal L23 [Camelina sativa]	0.0959527	-0.283008	-1.13461	0.0331447
CCG003098	Homeodomain-like superfamily isoform 1 [Theobroma cacao]	0.3558	1.65264	2.09202	1.044
CCG003101	Ankyrin repeat and kinase domain-containing 1 [Gossypium arboreum]	-1.00645	-3.08645	-6.38464	-3.62507
CCG003114	gibberellin receptor GID1B-like [Prunus mume]	0.0839607	2.12504	2.61819	1.90748
CCG003118	probably inactive leucine-rich repeat receptor kinase IMK2	-1.11296	-1.33204	-2.17612	-0.722695
CCG003119	histidine-containing phosphotransfer 1-like	-0.131331	1.06723	1.68881	0.12866
CCG003121	receptor-like cytosolic serine threonine- kinase RBK2	0.937184	4.01846	3.702	5.02648
CCG003125	pentatricopeptide repeat-containing mitochondrial-like	-0.443227	-0.460524	-1.49023	-0.118924
CCG003126	U3 small nucleolar RNA-associated 15 homolog	-0.777588	-1.85428	-1.69313	0.913465
CCG003129	peroxidase 3-like	-0.155625	-2.09669	-4.82257	-6.74107
CCG003130	rho GTPase-activating 2-like	-0.00499386	-1.48412	-2.84278	-1.54446
CCG003131	nucleosome assembly 1 1	-0.229608	2.30995	3.70173	3.5108
CCG003136	secoisolariciresinol dehydrogenase isoform X1	-0.623352	-0.94704	-0.445681	-1.27139
CCG003141	probable indole-3-pyruvate monooxygenase YUCCA10	-0.290465	-1.67708	-1.23241	-0.609634
CCG003142	conserved hypothetical protein [Ricinus communis]	-2.59082	-6.02557	-6.30431	-5.51229
CCG003143	Kinase interacting family isoform 1 [Theobroma cacao]	0.353406	-0.92652	-2.70305	-1.68385
CCG003145	sodium hydrogen exchanger 1-like [Eucalyptus grandis]	0.185189	0.955194	0.518962	1.06648
CCG003148	TRANSPORT INHIBITOR RESPONSE 1-like	0.688964	1.30131	0.934596	-0.0375506
CCG003149	---NA---	3.53775	2.76311	2.04772	2.05169
CCG003150	---NA---	0.84094	0.546427	2.29879	1.26564
CCG003157	pentatricopeptide repeat-containing mitochondrial	-0.170032	-0.769847	-1.60811	0.0729922
CCG003158	---NA---	-3.21105	-2.82478	-1.3214	-1.02391
CCG003159	Alpha-soluble NSF attachment [Medicago truncatula]	0.159796	0.726584	1.19668	0.449913
CCG003160	D-alanine--D-alanine ligase family isoform 1 [Theobroma cacao]	-0.395939	-1.64339	-1.58951	-1.35176
CCG003163	short-chain dehydrogenase reductase 2a-like	0.646196	0.902003	0.341051	1.41287
CCG003169	probable WRKY transcription factor 33	2.60437	2.79176	2.99933	3.95818
CCG003171	CASP 4B1	0.00465367	-0.0107608	0.275574	-1.20896
CCG003173	probable phosphatase 2C 65	4.17969	3.04145	2.63182	1.82288
CCG003174	aldose reductase-like	0.140644	2.57886	3.05711	0.19146
CCG003175	patellin-6 [Vitis vinifera]	-0.52029	-0.49094	-0.446915	-1.17176
CCG003177	Kelch diablo [Morus notabilis]	-0.179253	-0.138676	-0.896832	-1.36312
CCG003179	macrophage migration inhibitory factor homolog	3.22822	1.03971	0.894107	-1.1585
CCG003180	tRNA (guanine(10)-N2)-methyltransferase homolog	-0.514572	-0.909978	-0.65691	1.19288
CCG003181	tRNA (guanine(10)-N2)-methyltransferase homolog	-0.232492	-0.883296	-0.500801	1.10985
CCG003182	Zinc finger ZAT2 [Morus notabilis]	2.46928	-0.421957	-0.40707	0.985437
CCG003188	protease Do-like chloroplastic	-0.347025	-0.723166	-1.12129	-0.35756
CCG003192	NAP1-related 2	-0.111932	-1.2441	-3.22396	-0.483159
CCG003196	40S ribosomal [Ricinus communis]	0.126893	-0.400004	-1.87895	-0.863315
CCG003197	Autophagy-related 18	3.4865	5.01853	2.61654	1.95828
CCG003198	transcription factor ILI5-like	1.75634	2.41349	1.52355	-0.0912747
CCG003199	tubulin alpha chain	-0.151199	-1.92509	-3.92409	-4.25229
CCG003201	60S ribosomal L26-1 [Malus domestica]	-0.167716	-0.943478	-1.85567	-0.503251
CCG003203	hypothetical protein EUGRSUZ_H05083	-1.35385	-1.13329	-0.285812	0.534917
CCG003204	ABC transporter B family member 19	-0.0765025	-2.3951	-5.1586	-3.06751
CCG003205	ABC transporter B family member 19-like	-0.119593	-2.14342	-4.86838	-2.9398
CCG003206	elongation factor 1-gamma-like	-0.227773	-0.995438	-1.59604	-0.538529
CCG003207	transmembrane [Medicago truncatula]	0.578877	0.822315	0.278663	1.11938
CCG003211	methylesterase chloroplastic	-0.246365	-0.696784	-1.44961	-1.08051
CCG003213	HD domain-containing 2-like	-0.0592861	-0.881147	-1.67584	-1.18155
CCG003215	DEAD DEAH box RNA helicase family isoform 1 [Theobroma cacao]	0.228834	-0.716548	-1.5848	-0.356347
CCG003217	transcription repressor MYB6-like	0.820717	1.36444	2.34106	2.01843
CCG003224	ribonucleases P MRP subunit POP1 [Nelumbo nucifera]	-0.604699	-0.00302182	0.810211	1.09268
CCG003227	leucine-rich repeat receptor kinase TDR	-0.240437	-1.71376	-3.01815	-1.70994
CCG003231	F-box At5g07670-like	0.584874	-0.360107	-1.8306	-1.48914
CCG003241	pentatricopeptide repeat-containing At5g56310-like	2.84575	1.80981	0.142065	0.145762
CCG003242	sulfite oxidase	-0.360834	0.591387	1.13929	-1.46448
CCG003243	cytochrome P450 94B3-like	1.32599	0.898049	-0.262794	0.559135
CCG003244	fidgetin 1	0.034296	-0.569729	-0.7526	-1.00236
CCG003246	60S ribosomal L17-2	-0.0114484	-0.701413	-1.31741	-0.615144
CCG003247	F-box kelch-repeat At3g27150 [Eucalyptus grandis]	-0.445778	-1.10819	-1.51191	-1.97203
CCG003248	Ribosomal S21 family isoform 1 [Theobroma cacao]	-0.650397	1.14997	1.62638	-0.468217
CCG003249	Chloride channel CLC-b	-0.478755	-1.37695	-1.27074	-1.88039
CCG003252	Blue copper [Ricinus communis]	0.182906	0.29744	-1.70387	-3.51571
CCG003254	triacylglycerol lipase 2	1.97037	1.77727	-0.877633	0.565639
CCG003255	Uncharacterized protein isoform 1 [Theobroma cacao]	1.26118	1.02908	0.905102	-0.263774
CCG003257	LYK2 [Vitis vinifera]	0.0992609	0.19316	-1.99995	-1.63586
CCG003258	calcium-binding CML19	3.68317	3.77336	4.43914	5.99991
CCG003260	UPF0481 At3g47200-like [Populus euphratica]	-0.260467	-0.65156	-0.683275	-1.07732
CCG003261	UPF0481 At3g47200-like [Populus euphratica]	1.07004	1.3279	1.10741	0.134425
CCG003265	probable adenylate kinase mitochondrial	-0.218772	-1.46894	-1.08823	0.4017
CCG003266	Myosin-H heavy chain	-0.0346875	-0.57019	-2.30865	-2.33216
CCG003267	probable inactive leucine-rich repeat receptor kinase At3g03770	-0.276498	0.0841747	-1.21832	-1.76544
CCG003269	Ankyrin repeat [Theobroma cacao]	1.33835	0.685268	-2.75915	-1.64627
CCG003270	Ankyrin repeat [Theobroma cacao]	1.60794	0.811827	-2.14429	-1.41
CCG003271	ribosome-recycling chloroplastic	0.114122	-0.834248	-2.05241	0.244533
CCG003272	Mitochondrial transcription termination factor family isoform 1 [Theobroma cacao]	1.00031	0.362613	-0.642451	0.468289
CCG003288	ras-related Rab7	-1.31435	0.0764	0.154778	-0.866946
CCG003289	ras-related Rab7	-0.220461	0.957956	1.36728	-0.00626641
CCG003290	probable WRKY transcription factor 51	-0.441303	1.26867	0.0600007	-1.60823
CCG003298	---NA---	0.418548	1.56274	1.32377	1.10107
CCG003300	pentatricopeptide repeat-containing At4g39530	0.263374	-0.416741	-1.06568	0.808039
CCG003301	Shikimate isoform 1 [Theobroma cacao]	1.14735	2.19753	1.85819	2.14829
CCG003304	4-alpha- chloroplastic amyloplastic	0.221749	0.0106006	-1.15408	-0.778287
CCG003305	stress enhanced chloroplastic	-1.09928	0.498608	0.113223	1.29866
CCG003307	hypothetical protein L484_020070 [Morus notabilis]	-0.0723068	0.37566	0.31299	1.10378
CCG003308	elicitor peptide 6-like	-0.303059	-0.978015	-2.77021	-2.51628
CCG003311	hypothetical protein PHAVU_001G104000g [Phaseolus vulgaris]	0.609789	1.3791	1.68311	1.68781
CCG003314	Myosin-H heavy chain isoform 1 [Theobroma cacao]	0.00348374	1.80678	1.05822	0.369209
CCG003315	E3 ubiquitin- ligase RKP	0.201274	0.740342	0.882446	1.54395
CCG003317	transmembrane [Medicago truncatula]	-0.333307	-1.11212	-2.05946	-3.29858
CCG003319	probable inactive receptor kinase At5g10020	-0.745683	-1.35716	-1.21734	-1.44003
CCG003320	probable inactive receptor kinase At5g10020	-0.727682	-1.44126	-1.2259	-1.39641
CCG003321	transmembrane [Medicago truncatula]	-0.360534	1.37987	0.814081	2.33723
CCG003324	Mitochondrial transcription termination factor family [Theobroma cacao]	-0.293467	-0.721702	-1.26662	-0.420626
CCG003332	Hydroxyproline-rich glyco family [Theobroma cacao]	-0.296269	0.716537	1.0476	0.931402
CCG003337	Hydroxyproline-rich glyco family [Theobroma cacao]	-0.352456	0.458389	0.978708	1.23445
CCG003343	40S ribosomal S4-1	0.0431913	-0.221633	-1.23732	0.0195559
CCG003344	glycosyltransferase family 92	0.133401	-1.40966	-1.98146	-1.56866
CCG003345	PREDICTED: uncharacterized protein LOC100242840	3.08006	-2.67394	-1.70945	0.175096
CCG003347	probable purine permease 4	-1.25704	-1.84742	-1.55718	-0.419754
CCG003348	DNA replication licensing factor MCM6	-0.0437973	-2.18378	-3.12992	-2.70408
CCG003349	DREPP plasma membrane polypeptide family [Populus trichocarpa]	-1.14122	-2.30981	-3.19581	-3.48055
CCG003351	leucine-rich repeat receptor-like serine threonine- kinase BAM3	0.337314	-1.24278	-2.00233	-2.02419
CCG003357	CTP synthase family isoform 1 [Theobroma cacao]	1.35314	2.01083	0.182148	0.243369
CCG003359	aspartate mitochondrial	1.62376	2.31898	0.977959	1.01699
CCG003365	E3 ubiquitin- ligase MARCH8-like isoform X1 [Nicotiana sylvestris]	0.343256	1.38605	2.16863	-0.836271
CCG003366	E3 ubiquitin- ligase MARCH8-like isoform X1 [Nicotiana sylvestris]	-1.67919	1.57787	3.22191	1.402
CCG003367	probable E3 ubiquitin ligase SUD1 isoform X1 [Cucumis sativus]	-1.51918	0.431855	1.50077	0.260158
CCG003368	E3 ubiquitin- ligase MARCH8-like	-1.34108	0.800937	1.43423	0.387179
CCG003369	pentatricopeptide repeat-containing At4g17915 [Nicotiana tomentosiformis]	-0.36084	-0.766912	-0.991052	-1.00537
CCG003370	60S ribosomal L11	-0.0331172	-0.495327	-1.00627	0.0502525
CCG003371	circumsporozoite -like	-0.683269	-1.21397	-0.760391	-0.0751172
CCG003372	DNAJ heat shock N-terminal domain-containing isoform 2 [Theobroma cacao]	-1.14009	-1.05936	0.0405005	0.867593
CCG003375	ras-related Rab11D	-0.00922589	0.509148	1.28908	0.433752
CCG003378	---NA---	-0.629375	-0.751937	-0.407206	-2.18011
CCG003380	epoxide hydrolase 3-like	0.801133	-0.154329	1.48789	-0.0478547
CCG003382	heat stress transcription factor A-4b-like	2.2845	3.04632	4.27379	4.54833
CCG003383	Small heat shock C2	0.0110612	-0.330861	-1.31651	-1.86614
CCG003385	trichome birefringence-like 43	6.37204	NA	NA	1.82931
CCG003386	probable LRR receptor-like serine threonine- kinase At1g07650	1.57504	0.326774	0.109921	-0.606543
CCG003391	citrate glyoxysomal	0.342821	1.22984	1.92111	0.875036
CCG003394	TOO MANY MOUTHS	0.0171172	-1.89699	-0.818367	-1.75673
CCG003401	ATP-dependent DNA helicase PIF1-like	-0.797036	-0.858211	-1.04722	-0.57052
CCG003404	zinc finger BED domain-containing RICESLEEPER 1-like	-0.540829	-0.104704	0.133915	1.04939
CCG003405	zinc finger BED domain-containing RICESLEEPER 1-like	-0.166714	0.261785	0.1919	1.08244
CCG003414	Portal 56	-0.118631	-1.71468	-3.06949	-2.52059
CCG003418	DEAD-box ATP-dependent RNA helicase 53-like	-0.226864	-1.09299	-1.40176	0.741952
CCG003419	long-chain-alcohol oxidase FAO2-like	-0.486	1.50824	1.41931	0.0284956
CCG003433	pentatricopeptide repeat-containing mitochondrial	-0.441789	-1.00979	-1.76045	-0.38355
CCG003436	TMV resistance N-like	0.679321	-0.507303	0.0315423	-2.13088
CCG003440	LONGIFOLIA 1-like [Populus euphratica]	-0.582282	-0.574489	-0.968968	-1.70205
CCG003441	transcription factor TCP5-like	-0.58637	-1.05157	-1.08281	-1.48401
CCG003446	Emb: [Theobroma cacao]	5.64073	3.01091	2.94501	6.04878
CCG003447	RNA binding [Ricinus communis]	-0.549205	-1.11966	-4.40168	-4.16176
CCG003448	probable glycerophosphoryl diester phosphodiesterase 3	-0.572253	-0.526616	-0.710001	-1.21488
CCG003450	replication A 70 kDa DNA-binding subunit B	-0.0611554	-1.54048	-4.81544	-3.98628
CCG003453	exocyst complex component EXO70B1	2.36367	1.18298	1.12039	-1.73799
CCG003454	homeobox-leucine zipper ATHB-40-like	1.36939	3.96565	3.11035	1.30436
CCG003456	respiratory burst oxidase homolog A-like	-0.566876	-0.432428	-0.101605	-1.8255
CCG003458	S-adenosylmethionine carrier chloroplastic mitochondrial	-0.398639	-0.554421	-1.10294	1.32672
CCG003461	Sulfate thiosulfate import ATP-binding cysA [Theobroma cacao]	-3.17668	-3.35025	-3.13705	-2.93869
CCG003466	tRNA(adenine(34)) chloroplastic	0.528009	0.977857	1.25729	0.470236
CCG003467	mediator-associated 1-like	-2.12733	-2.04381	-2.8283	-3.5737
CCG003468	mediator-associated 1	-0.388082	0.269307	0.290931	1.05034
CCG003472	cysteine synthase-like [Fragaria vesca vesca]	0.855791	1.56634	2.00379	1.51986
CCG003474	cysteine synthase-like [Fragaria vesca vesca]	0.0785134	0.684359	1.23443	-0.0684994
CCG003475	DEAD-box ATP-dependent RNA helicase 35	0.502728	0.0217311	0.690544	1.65536
CCG003483	[Arabidopsis lyrata lyrata]	-1.76399	-4.61621	-1.5289	-4.70726
CCG003484	translocase subunit	0.184579	-0.576419	-1.11816	-0.0392242
CCG003485	Ribosomal RNA small subunit methyltransferase A [Gossypium arboreum]	-0.00639197	-0.75668	-1.21179	-1.00506
CCG003486	kinesin KIFC3	-0.164856	-1.32098	-1.36023	-1.02122
CCG003488	acyltransferase chloroplastic isoform X1 [Nelumbo nucifera]	-0.13157	0.11716	1.40417	2.00232
CCG003491	probable nucleolar 5-2	-0.272445	-1.41678	-1.67195	0.14999
CCG003497	sodium hydrogen exchanger 2-like	-0.143572	1.59526	1.6218	0.68004
CCG003500	transmembrane adipocyte-associated 1-like	-0.0190641	0.764033	1.10967	0.51263
CCG003504	---NA---	-0.644061	-0.122993	0.713757	-1.61097
CCG003506	heparanase 3	-0.0608047	0.486173	-0.569907	-3.05708
CCG003507	probable anion transporter chloroplastic isoform X2	-0.126413	0.394265	1.0057	0.851231
CCG003510	Arogenate dehydrogenase [Theobroma cacao]	0.239056	1.84149	1.14987	0.552283
CCG003511	pyrophosphate-energized vacuolar membrane proton pump-like	-0.205797	2.2597	2.50246	-0.575537
CCG003517	probable tyrosine--tRNA mitochondrial	0.119113	-0.214016	-1.26259	-0.625159
CCG003519	phosphatidylinositol 4-phosphate 5-kinase 1-like	-0.241805	-0.971083	-1.71491	-1.16416
CCG003520	translation factor GUF1 chloroplastic	-0.25018	-0.0576719	1.13878	1.02816
CCG003523	anthocyanidin 3-O-glucosyltransferase 5-like	-1.49101	-3.11915	-2.39778	-2.18475
CCG003539	vinorine synthase-like	1.31864	-1.44142	-5.71952	-5.78227
CCG003540	ent-kaurenoic acid oxidase 2-like	-0.216905	-2.94073	-4.18639	-6.16476
CCG003542	glycine cleavage system H mitochondrial	-0.323661	0.104732	1.33017	-0.264541
CCG003547	transcription [Ricinus communis]	1.73248	0.478844	1.19199	4.08128
CCG003552	plant intracellular Ras-group-related LRR 5-like	-1.38799	0.273582	1.14845	-0.763161
CCG003553	eyes absent homolog 2 isoform X1 [Vitis vinifera]	0.179543	0.92015	1.67781	0.693925
CCG003555	LOL1 [Vitis vinifera]	-1.37908	-1.38835	-0.601274	-4.38413
CCG003556	ferredoxin isoform X1 [Populus euphratica]	-0.425848	0.998836	1.8171	0.128594
CCG003570	ankyrin repeat-containing At3g12360-like isoform X3	0.216859	0.24727	-0.62386	-3.90055
CCG003571	PREDICTED: uncharacterized protein LOC103965855	0.378049	0.467235	-0.896243	-2.61491
CCG003590	60S ribosomal L7a	-0.0262311	-0.488615	-1.21106	-0.549514
CCG003592	ACT domain repeat 6 isoform 1 [Theobroma cacao]	0.959858	0.599979	-2.62505	-3.97393
CCG003593	recQ-mediated genome instability 1 isoform X1	-0.221826	-0.677368	-1.74254	-0.986835
CCG003596	histone chaperone RTT106-like	-0.563865	-1.01667	-1.47032	-2.46977
CCG003597	HVA22 e isoform X1	1.44243	1.82202	0.366079	-0.056932
CCG003599	superoxide dismutase 1 copper chaperone	-0.48135	-1.16661	-0.765793	-3.34675
CCG003600	UDP-arabinopyranose mutase 1-like	0.058981	-0.322231	-4.18126	-3.55754
CCG003601	probable WRKY transcription factor 75	-0.195699	2.34104	3.56586	3.25123
CCG003602	PREDICTED: uncharacterized protein LOC103338092	3.24288	2.44872	2.38059	2.82572
CCG003604	squamosa promoter-binding 13A [Populus euphratica]	-0.900774	-1.65667	-2.11754	-0.575243
CCG003616	Sulfate thiosulfate import ATP-binding [Theobroma cacao]	-1.71931	0.349675	0.499522	0.21136
CCG003618	transcription factor bHLH62	0.136351	-2.18378	-2.23943	-1.66753
CCG003620	probable xyloglucan glycosyltransferase 6	-0.665014	-1.43729	-1.85139	-0.622223
CCG003622	peptidyl-prolyl cis-trans isomerase FKBP62-like	0.107083	-0.549204	-1.27618	-0.222412
CCG003625	non-functional NADPH-dependent codeinone reductase 2-like	0.414361	2.64493	2.26073	2.97974
CCG003627	non-functional NADPH-dependent codeinone reductase 2-like	-0.354244	2.02828	1.81303	2.43829
CCG003629	probable glucan endo-1,3-beta-glucosidase A6	-0.290881	-2.56676	-3.07994	-1.96715
CCG003632	[Theobroma cacao]	-1.70961	1.51153	2.26887	0.553668
CCG003633	cytochrome P450 CYP82D47-like	-0.742751	-1.42227	1.54122	2.20141
CCG003641	quinone-oxidoreductase chloroplastic	0.00849581	-0.189699	-1.33712	-2.47176
CCG003642	quinone-oxidoreductase chloroplastic	2.22159	2.50093	2.78818	2.37517
CCG003643	quinone-oxidoreductase chloroplastic	1.8845	2.149	2.51767	0.810345
CCG003644	quinone-oxidoreductase chloroplastic	-0.33504	-1.86314	-3.31371	-3.30225
CCG003648	Ninja-family AFP3	1.27966	2.79378	1.26307	0.33769
CCG003650	galacturonosyltransferase 8	0.0553552	-0.769804	-0.978353	-1.12134
CCG003651	transmembrane [Medicago truncatula]	0.439074	-1.20925	-2.9962	-2.6471
CCG003653	Cysteine Histidine-rich C1 domain family [Theobroma cacao]	0.365695	-1.35995	-2.60291	-2.52292
CCG003656	probable carotenoid cleavage dioxygenase chloroplastic	4.06625	2.18991	-0.583483	-0.568119
CCG003662	ABC transporter G family member 14	-0.165021	-1.14934	-1.10272	0.3579
CCG003664	upstream activation factor subunit UAF30-like	-0.0111702	-1.19489	-1.89219	-0.523571
CCG003667	glycine-rich A3-like [Phoenix dactylifera]	1.97052	0.711956	0.979329	0.968059
CCG003668	LURP-one [Medicago truncatula]	8.19994	3.95429	5.82854	6.0295
CCG003671	ABC transporter E family member 2	0.151362	0.915869	1.08025	0.764145
CCG003676	pentatricopeptide repeat-containing mitochondrial	-0.315421	-0.698529	-1.05587	-0.16978
CCG003678	abscisic acid 8 -hydroxylase 1-like	-1.80206	0.109498	0.596709	-1.37701
CCG003682	PREDICTED: uncharacterized protein LOC100266552 isoform X1 [Vitis vinifera]	-1.56512	-1.39552	-3.00443	-3.97653
CCG003683	Long-chain-alcohol oxidase FAO4A	-0.798192	-1.76242	-0.745502	-0.384545
CCG003684	---NA---	-1.02159	-0.616554	0.334606	-1.44053
CCG003688	Ankyrin repeat-containing [Theobroma cacao]	-0.22493	-2.56846	-3.60383	-1.81677
CCG003697	F-box family isoform 1 [Theobroma cacao]	0.143866	1.32571	0.752538	1.09691
CCG003699	NC domain-containing family [Populus trichocarpa]	-0.30689	-0.88603	-0.932805	-1.84547
CCG003700	bifunctional fucokinase fucose pyrophosphorylase	0.00413772	-1.01127	-0.963455	-0.279924
CCG003703	yippee-like At4g27745 [Nelumbo nucifera]	-1.96776	-1.38833	-1.86604	-3.5782
CCG003704	calcium-binding KIC	-0.228735	0.28832	-1.39737	-2.75237
CCG003710	galactinol synthase family [Populus trichocarpa]	6.4765	3.90702	2.55353	3.06505
CCG003711	chloroplast stem-loop binding of 41 kDa chloroplastic	-0.507327	-1.55816	-1.48818	-0.882901
CCG003715	alkaline neutral invertase CINV2-like	0.609421	3.15626	2.69287	1.27858
CCG003716	PREDICTED: uncharacterized protein LOC100266586 isoform X3	-0.163295	0.193954	0.667619	1.71544
CCG003721	xaa-pro aminopeptidase p [Gossypium arboreum]	-0.0271497	-0.48433	-1.04445	-0.198419
CCG003724	transcription factor bHLH149-like	-0.449137	1.99	2.18733	0.67172
CCG003728	Galactose oxidase kelch repeat superfamily isoform 2 [Theobroma cacao]	-0.310551	-0.465859	-2.02155	-2.45471
CCG003731	polyubiquitin [Zea mays]	-0.167442	1.35771	0.885458	-0.0711176
CCG003733	EFR3 B	-0.11049	-0.617044	-2.17877	-1.54008
CCG003736	nicotianamine synthase	0.0952076	0.676807	-1.46987	-0.0964921
CCG003744	Octicosapeptide Phox Bem1p family [Theobroma cacao]	-1.06043	-1.35007	-0.968237	-0.302067
CCG003746	senescence-associated carboxylesterase 101-like	0.33694	-0.940039	-2.20879	-2.76481
CCG003754	long-chain-alcohol oxidase FAO2-like	0.728794	2.06284	3.72242	1.95287
CCG003755	long-chain-alcohol oxidase FAO2-like	0.821363	2.33958	3.90602	1.37087
CCG003761	---NA---	0.31583	-2.17966	-2.57084	-4.38568
CCG003762	---NA---	-0.0966605	-1.09336	-0.609084	3.51159
CCG003774	subtilisin-like protease	4.86938	6.4704	8.38727	8.84868
CCG003779	probable magnesium transporter NIPA8 isoform X1 [Eucalyptus grandis]	0.0775298	2.28708	0.675705	1.51894
CCG003780	disease resistance [Medicago truncatula]	0.037069	-0.843853	-1.57175	-4.41549
CCG003781	GRF1-INTERACTING FACTOR 1 family [Populus trichocarpa]	-0.162091	-0.485926	-6.90867	-2.09582
CCG003787	aspartyl protease family [Populus trichocarpa]	0.00428783	-0.379483	-2.03464	-2.54163
CCG003792	calmodulin-binding receptor-like cytoplasmic kinase 3 [Prunus mume]	0.231889	0.896769	1.05898	1.30219
CCG003793	Tetratricopeptide repeat (TPR)-like superfamily isoform 1 [Theobroma cacao]	-0.145924	-0.436065	-1.37886	-0.270154
CCG003794	uncharacterized vacuolar membrane YML018C-like	-0.330794	1.59799	2.01219	2.04467
CCG003798	monogalactosyldiacylglycerol synthase chloroplastic-like	-1.34979	-1.50721	-0.735017	-0.706199
CCG003807	glutathione S-transferase DHAR2-like	0.00974444	-0.838748	-3.5268	-3.35045
CCG003809	dirigent 25-like	0.193167	-2.42688	-3.84057	-6.30653
CCG003810	dirigent 24	0.0934157	-0.881876	-3.04787	-5.5086
CCG003811	dirigent 25-like	-0.097579	-0.151299	-1.92214	-5.60265
CCG003814	caffeoylshikimate esterase-like	0.817788	1.21685	1.43108	1.45582
CCG003815	60S ribosomal L35	-0.132297	-0.485488	-1.12972	0.108713
CCG003819	probable membrane-associated kinase regulator 4	-0.928906	-4.5376	-3.34769	-0.12847
CCG003821	chalcone isomerase	-0.502111	-1.70519	-3.00319	-0.803582
CCG003823	ABC transporter G family member 6-like	-0.449894	1.41424	1.84915	2.02046
CCG003830	golgin subfamily B member 1 isoform X1 [Populus euphratica]	0.282468	-0.927762	-1.24354	0.207333
CCG003831	hypothetical protein POPTR_0010s22150g [Populus trichocarpa]	-0.0451775	-2.18938	-7.656	-4.23837
CCG003836	TBC1 domain family member 8B	0.0108225	-0.454642	-1.40687	-1.26765
CCG003838	elongator complex 6-like	-0.475302	-1.31759	-0.923044	-0.569746
CCG003839	Pseudo response isoform partial [Theobroma cacao]	2.80441	0.693612	-0.13193	0.192362
CCG003845	probable LRR receptor-like serine threonine- kinase At1g56130	-1.18448	-2.20005	-0.8289	-2.692
CCG003847	probable LRR receptor-like serine threonine- kinase At1g56130	-0.370939	1.25701	1.72756	1.65161
CCG003851	PREDICTED: uncharacterized protein LOC101489878	-0.705936	0.787763	1.54381	1.83109
CCG003853	Myb domain 58 isoform 1 [Theobroma cacao]	0.736716	1.32586	2.11172	2.03881
CCG003857	[Theobroma cacao]	-0.783885	-1.06997	-1.25545	0.375208
CCG003860	TMV resistance N-like	1.14391	0.301216	0.717168	-0.354868
CCG003861	Mitochondrial transcription termination factor family [Theobroma cacao]	-0.294064	-1.11649	-1.62665	-0.0608783
CCG003863	Mitochondrial transcription termination factor family [Theobroma cacao]	0.176059	-0.221525	-1.17491	0.600845
CCG003866	basic helix-loop-helix family [Populus trichocarpa]	1.84686	0.676413	0.372633	1.45425
CCG003867	Sec14p-like phosphatidylinositol transfer family [Theobroma cacao]	8.53798	3.5975	NA	3.47306
CCG003873	Beta-galactosidase 8 isoform 1 [Theobroma cacao]	-0.323962	1.87361	3.94448	0.503034
CCG003875	WD repeat-containing 20-like	0.162281	1.0378	1.02105	1.32721
CCG003876	dystrophia myotonica WD repeat-containing -like	0.185242	1.00506	0.949701	1.3359
CCG003877	fasciclin-like arabinogalactan 11	0.0487266	-0.0581134	-2.83028	-8.00294
CCG003879	fasciclin-like arabinogalactan 12	-1.14514	-0.186974	-3.82166	-8.49855
CCG003881	fasciclin-like arabinogalactan 12	-0.648831	-2.06621	-8.5015	-8.56451
CCG003884	fasciclin-like arabinogalactan 11	0.0510139	-0.398588	-4.59302	-12.8766
CCG003885	zinc finger JACKDAW-like	-0.389412	-0.183558	-0.502214	-1.45712
CCG003888	transport Sec61 subunit beta	-0.910532	1.04269	1.76449	-0.413086
CCG003889	MLO 6	-0.272502	1.89697	2.7081	2.06975
CCG003890	MLO 6	2.06939	2.72173	2.74147	3.5458
CCG003891	MLO 3	-0.167824	0.769669	0.861954	1.53417
CCG003892	auxin response factor 4-like isoform X1	-0.302369	-2.12961	-2.45113	-1.52274
CCG003893	isovaleryl- mitochondrial	0.326124	2.78078	2.60123	0.475645
CCG003896	DNA-binding with MIZ SP-RING zinc finge isoform 1 [Theobroma cacao]	0.463649	0.867741	1.08988	1.03393
CCG003902	Elongation factor 1-alpha	0.0472203	-0.333926	-1.21435	-0.611747
CCG003906	vicilin-like antimicrobial peptides 2-2	0.535152	5.10938	3.41885	2.0964
CCG003907	exonuclease chloroplastic	-0.0384294	1.71474	1.50242	-0.17479
CCG003909	exonuclease chloroplastic	5.27602	4.28474	4.44453	4.4106
CCG003910	exonuclease chloroplastic	6.38929	5.39901	5.33643	5.84754
CCG003911	probable serine threonine- kinase WNK4	-1.32296	2.26871	3.04822	2.44815
CCG003912	Ovate family [Theobroma cacao]	-1.26907	-1.32591	-1.06178	-1.07304
CCG003913	Ribosomal L22p L17e family [Theobroma cacao]	-0.0723785	-0.423409	-1.18283	-0.417375
CCG003914	transcription repressor OFP17-like	-0.385843	-4.55179	-4.58441	-4.67962
CCG003915	hypothetical protein POPTR_0013s15140g [Populus trichocarpa]	-0.348352	-1.93371	-3.40892	-2.91368
CCG003916	EPIDERMAL PATTERNING FACTOR 6 [Glycine soja]	-0.705435	-2.65762	-2.27748	-3.06271
CCG003918	GTP-binding [Morus notabilis]	-0.475606	-2.06821	-1.57125	0.245737
CCG003919	Methyltransferase-related [Theobroma cacao]	-0.0804674	1.2368	1.32393	0.320899
CCG003923	YLP motif-containing 1-like	0.307428	1.99282	2.00179	0.699793
CCG003925	peroxidase 4-like	-0.661724	2.95973	3.29165	2.81877
CCG003926	peroxidase 4-like	-0.840912	-0.255751	-1.62492	-3.47657
CCG003929	peroxidase P7-like	-1.01024	-1.31055	-1.75568	-3.37008
CCG003932	Peroxidase [Medicago truncatula]	-0.353752	-1.96189	-4.17796	-4.17672
CCG003933	Peroxidase [Medicago truncatula]	0.0434771	-0.650305	-2.34379	-2.62998
CCG003934	cationic peroxidase 1-like	1.46561	4.79192	8.10111	7.05713
CCG003938	Transcription factor bHLH61 isoform 2 [Theobroma cacao]	-1.82091	-5.56515	-2.33985	-5.2463
CCG003939	nodulin-related family [Populus trichocarpa]	-1.60984	-3.75031	-0.776723	4.21381
CCG003940	alanine--glyoxylate aminotransferase 2 homolog mitochondrial-like	0.410666	1.23545	0.727016	-0.660874
CCG003942	cytochrome P450 89A2-like	1.02157	3.1887	1.79949	3.11854
CCG003944	cytochrome P450 89A2-like	0.636908	2.08051	1.88547	2.55459
CCG003945	cytochrome P450 89A2-like	0.132839	1.5232	1.6247	1.72345
CCG003946	cytochrome P450 89A2-like	-1.132	-0.755856	0.733037	2.28947
CCG003947	---NA---	-0.27212	-1.36973	-0.608109	-0.330121
CCG003948	ankyrin repeat-containing At3g12360-like	0.285317	-0.531849	-1.80022	-3.37199
CCG003950	UPF0187 chloroplastic	-1.2205	-1.60549	-1.26078	-0.968281
CCG003953	---NA---	0.186217	0.64219	1.41802	1.19866
CCG003955	kinase family [Populus trichocarpa]	0.512739	-1.13242	-2.64495	-2.63244
CCG003957	AT hook motif DNA-binding family isoform 1 [Theobroma cacao]	-0.0737715	-0.0135388	-1.0018	-4.04258
CCG003960	multiple C2 and transmembrane domain-containing 2 [Nelumbo nucifera]	0.406687	2.16145	2.26797	1.39465
CCG003963	cleavage and polyadenylation specificity factor subunit 3-II	-0.261801	-1.02785	-0.0558276	0.486266
CCG003965	O-glucosyltransferase rumi homolog	-0.47659	1.41224	1.92327	0.770682
CCG003967	O-glucosyltransferase rumi homolog	0.518347	1.17347	0.751481	0.355625
CCG003974	DNA-binding family [Populus trichocarpa]	2.19427	-0.388188	-0.870318	-0.884199
CCG003975	myb-related 308 [Vitis vinifera]	2.34153	3.4698	1.71411	3.24623
CCG003989	(+)-neomenthol dehydrogenase-like	0.0167458	3.37616	4.91849	5.33802
CCG003990	SPX domain-containing 3-like	-0.890255	-0.916127	-1.40299	0.703213
CCG003991	kinase chloroplastic-like	-0.401576	0.748166	1.61894	-0.580743
CCG003996	scarecrow 6	-0.879732	-0.65294	-0.295199	-1.12233
CCG003997	autophagy-related 8f-like [Eucalyptus grandis]	0.359531	2.39131	2.69389	1.35249
CCG003999	Uncharacterized protein TCM_036468 [Theobroma cacao]	-0.541112	-1.47185	-1.16039	0.664722
CCG004000	spindle and kinetochore-associated 1 homolog	0.211876	-1.20358	-3.04614	-2.20094
CCG004005	flavin-containing monooxygenase FMO GS-OX5-like isoform X1	-0.430688	1.0864	1.71088	1.76944
CCG004010	PREDICTED: uncharacterized protein LOC103321839	0.123533	0.100058	-1.14412	-0.600407
CCG004011	---NA---	0.244788	1.61784	-1.64582	-0.954705
CCG004012	Beta-1,4-mannosyl-glyco 4-beta-N-acetylglucosaminyltransferase	-0.553607	-0.411443	-0.917336	-1.02185
CCG004015	PGPS D10 [Medicago truncatula]	-1.47323	-1.18008	-1.18512	-2.96933
CCG004017	flavonol synthase flavanone 3-hydroxylase-like	0.0929093	-0.0420383	-1.09071	-0.905876
CCG004019	plant intracellular Ras-group-related LRR 3	-1.92812	0.486569	1.33865	-0.866285
CCG004021	vacuolar iron transporter homolog 1-like	0.884726	0.98344	1.46803	2.43261
CCG004022	vacuolar iron transporter homolog 1-like	4.23447	2.96717	4.42645	4.22028
CCG004023	vacuolar iron transporter homolog 1-like	1.31717	0.0252482	-1.0134	0.621486
CCG004029	NAC domain IPR003441 isoform 1 [Theobroma cacao]	1.3372	4.62721	4.60311	4.29851
CCG004031	clathrin assembly At1g03050	6.38446	5.53928	2.94501	NA
CCG004032	peroxidase 43	-0.590256	-2.00417	-4.60958	-4.64623
CCG004037	glutamate decarboxylase family [Populus trichocarpa]	2.56921	4.45016	3.59017	4.96744
CCG004038	glutamate decarboxylase family [Populus trichocarpa]	2.54171	4.93572	4.11983	5.29301
CCG004039	NRT1 PTR FAMILY -like [Fragaria vesca vesca]	0.151935	1.26617	1.74533	0.84983
CCG004042	PREDICTED: uncharacterized protein LOC101308960 isoform X1	-0.637466	-0.933621	-1.02866	0.116881
CCG004047	hypothetical protein MIMGU_mgv1a017312mg	1.86209	1.83953	0.983435	3.19121
CCG004051	probable LRR receptor-like serine threonine- kinase At4g08850	0.0334293	-0.170824	-1.31277	-3.52288
CCG004055	Phospholipid glycerol acyltransferase family isoform 1 [Theobroma cacao]	0.0478061	2.13904	2.27716	0.944399
CCG004057	cellulose synthase D3	1.31732	2.07301	2.33655	3.28039
CCG004058	probable xyloglucan endotransglucosylase hydrolase 30	-1.16561	-1.01722	-0.888867	-2.30641
CCG004060	probable calcium-binding CML18	-0.302316	-1.36928	-0.813967	-0.621957
CCG004065	PREDICTED: uncharacterized protein LOC105646143	0.00716743	0.194385	-1.19831	-0.966952
CCG004066	Ribosome maturation factor rimM	-0.704775	-2.89132	-3.59628	-4.59576
CCG004074	probable CCR4-associated factor 1 homolog 11	0.397133	0.923147	1.0505	0.990243
CCG004080	citrate-binding -like	-3.38359	-7.38185	-4.96582	-2.72257
CCG004083	Syntaxin-22 [Gossypium arboreum]	0.00249434	-0.696631	-2.14544	-1.05052
CCG004089	ABC transporter B family member 2-like	-0.453367	-0.651996	-4.59444	-1.3063
CCG004090	Myb domain [Theobroma cacao]	0.416598	2.65395	3.14429	4.47014
CCG004092	Myb domain [Theobroma cacao]	0.929831	2.35641	2.02509	2.29528
CCG004093	Myb domain [Theobroma cacao]	2.93551	2.93763	2.03847	3.85869
CCG004096	Cellulose synthase A catalytic subunit 3 [UDP-forming]	0.118717	-0.774985	-1.61347	-2.33836
CCG004097	cellulose synthase catalytic subunit	-0.213868	-1.63431	-1.94627	-2.20699
CCG004107	lysosomal beta glucosidase-like	0.311335	-0.494545	-2.6422	-2.45852
CCG004108	lysosomal beta glucosidase-like	3.42684	2.70583	1.30085	1.51724
CCG004115	UPF0603 chloroplastic	2.39119	0.452086	0.846025	0.597719
CCG004116	UPF0603 chloroplastic-like	2.06012	0.239792	0.132785	-0.253391
CCG004122	disulfide-isomerase LQY1-like [Pyrus x bretschneideri]	-0.800597	-1.16285	-4.27929	-1.64992
CCG004123	probable carboxylesterase 15	-1.74784	-3.85786	-2.84749	-1.20668
CCG004124	---NA---	2.27394	3.09549	2.91859	3.26259
CCG004125	TGF-beta-activated kinase 1 and MAP3K7-binding 3-like	1.57141	3.33708	3.63758	3.84016
CCG004126	---NA---	2.06623	3.04347	3.1041	3.2528
CCG004127	phragmoplast orienting kinesin 2	-0.0270545	-1.94325	-4.29555	-3.0079
CCG004128	Outer envelope chloroplastic	0.668531	1.00836	1.21544	1.39357
CCG004129	PREDICTED: uncharacterized protein LOC101264331	1.21415	1.54976	1.571	1.27104
CCG004131	fasciclin-like arabinogalactan 17	-0.246738	-1.32064	-2.62135	-4.13531
CCG004133	strictosidine synthase 3	-0.352678	-1.49945	-1.79024	-1.50258
CCG004136	ubiquitin carboxyl-terminal hydrolase 8 isoform X1	0.165255	-0.7926	-2.04804	-0.588759
CCG004139	9-cis-epoxycarotenoid dioxygenase chloroplastic-like	7.56697	5.85995	2.4322	2.51571
CCG004141	RING U-box superfamily isoform 1 [Theobroma cacao]	0.114434	0.73815	0.970659	1.29786
CCG004142	interactor of constitutive active ROPs 4-like [Populus euphratica]	-0.301384	-0.334868	-0.837512	-1.76858
CCG004147	receptor-like serine threonine- kinase SD1-8	1.85441	2.05489	2.23576	2.03274
CCG004150	S-locus-specific glyco S6 [Ricinus communis]	1.15545	1.99081	2.12933	1.9868
CCG004152	G-type lectin S-receptor-like serine threonine- kinase At2g19130	1.49888	2.0327	1.01671	2.1106
CCG004154	G-type lectin S-receptor-like serine threonine- kinase At2g19130	1.36819	2.09083	2.98947	3.00313
CCG004170	formin 6	-0.188426	-1.17485	-0.865949	0.0504337
CCG004171	BTB POZ and TAZ domain-containing 4	0.489254	1.68548	3.12873	1.6449
CCG004172	D5-type cyclin	-0.749701	-4.07009	-7.8083	-4.20291
CCG004174	ARM repeat superfamily isoform 1 [Theobroma cacao]	0.59796	-0.27696	-2.02769	-0.72748
CCG004176	Transcription factor [Theobroma cacao]	0.338823	-1.16806	-0.998429	-0.848879
CCG004177	calcium-transporting ATPase plasma membrane-type-like	2.95422	1.11868	0.93174	1.64611
CCG004178	mitochondrial outer membrane porin 2-like [Populus euphratica]	0.0680456	-0.635994	-1.25029	-0.888177
CCG004179	60S ribosomal L26-1 [Malus domestica]	-0.118187	-0.663879	-1.02579	0.137205
CCG004181	adenylyl-sulfate kinase chloroplastic isoform X5 [Malus domestica]	-0.521367	-0.372012	-0.508717	-1.27794
CCG004183	Ribose-5-phosphate isomerase A	-0.447537	-1.11477	-2.08354	-0.0744516
CCG004186	PREDICTED: uncharacterized protein LOC104416896	0.393092	0.299288	-0.967861	-3.33353
CCG004187	ADP-ribosylation factor 8A	-0.0790356	-0.990162	-1.38893	-0.963385
CCG004193	Cytosolic beta-glucosidase	0.945383	1.2022	4.80003	2.7834
CCG004197	hypothetical protein L484_009375 [Morus notabilis]	-0.352804	0.941576	0.95164	1.01557
CCG004199	adiponectin receptor 2-like isoform X1 [Cucumis melo]	-0.422317	-0.521881	-1.36204	-0.337037
CCG004201	Galactosyl transferase GMA12 MNN10 family isoform 1 [Theobroma cacao]	-0.127062	-0.61295	-1.05571	-0.182956
CCG004202	ruvB-like 2	-0.06923	-0.737459	-1.15818	0.426507
CCG004205	hypothetical protein PRUPE_ppa025319mg [Prunus persica]	-2.50148	-3.57681	-2.80449	-1.28838
CCG004206	U-box domain-containing 30-like	-0.367083	-1.09767	-1.31177	-0.68425
CCG004208	VQ motif-containing family [Populus trichocarpa]	2.64231	4.16248	4.08082	5.5696
CCG004211	amino acid binding [Ricinus communis]	-0.61046	1.048	1.32414	0.67165
CCG004214	Vacuolar iron transporter (VIT) family [Theobroma cacao]	0.696944	-1.69676	-5.11587	-1.44222
CCG004215	Uncharacterized protein TCM_002847 [Theobroma cacao]	0.0282052	-1.25227	-2.83741	-1.58628
CCG004220	L-ascorbate oxidase-like	1.11849	0.162594	-2.04317	-1.3518
CCG004224	probable phosphatase 2C 75	2.76758	5.88696	4.37659	2.46523
CCG004226	receptor-like serine threonine- kinase At4g25390	0.467083	1.7863	1.47609	2.50164
CCG004227	transcription factor bHLH36-like	-1.42537	-1.72593	-3.01043	-2.4718
CCG004236	sucrose phosphate synthase [Mangifera indica]	-0.391146	-1.04222	-0.234382	-0.532633
CCG004240	chloroplast-targeted copper [Ricinus communis]	-1.95557	-2.78864	-2.69287	-2.45216
CCG004242	probable serine incorporator isoform X1 [Vitis vinifera]	-0.197673	-1.38336	-2.36805	-2.04403
CCG004243	leucine-rich repeat extensin 4	0.0533105	-1.28376	-2.28198	-1.89516
CCG004245	probable sulfate transporter	4.07629	6.11976	6.23124	4.21362
CCG004247	ARF guanine-nucleotide exchange factor GNL2	1.52769	-0.504642	-0.338988	1.50138
CCG004248	DNA mismatch repair MSH7	-0.171899	-1.21615	-2.26841	0.107704
CCG004250	multi -bridging factor 1c	1.69576	3.8852	1.96142	1.48963
CCG004256	Arabinogalactan [Theobroma cacao]	3.01321	2.71832	1.93605	2.5219
CCG004259	Uncharacterized protein TCM_037897 [Theobroma cacao]	-1.76114	1.80537	2.70697	0.287834
CCG004260	ras-related RHN1-like [Prunus mume]	-0.176622	0.832862	1.51687	0.247414
CCG004265	anthocyanidin 3-O-glucosyltransferase 7-like	-1.27325	-2.79079	-2.69317	-1.8843
CCG004268	glutamine amidotransferase YLR126C	0.40589	1.1937	0.196289	-2.68012
CCG004270	probable pectinesterase pectinesterase inhibitor 7	-0.822957	0.666303	1.05452	-1.00206
CCG004275	costars family	-0.17658	-0.665604	-0.707484	-1.2515
CCG004276	KH domain-containing At4g18375-like	-0.399728	-0.70511	-1.55471	-1.03772
CCG004278	Nicotinamidase 1 isoform 1 [Theobroma cacao]	0.00985784	1.54411	2.48702	0.595589
CCG004280	Executer 1 isoform 1 [Theobroma cacao]	0.313701	1.62824	1.33366	0.793082
CCG004282	Vacuole [Theobroma cacao]	-0.0793309	-0.999324	-1.32794	-0.86519
CCG004284	phragmoplast orienting kinesin 2-like	-0.142812	-0.562035	-2.45807	-1.72726
CCG004286	guanosine nucleotide diphosphate dissociation inhibitor At5g09550	-0.486036	-1.75253	-3.40457	-2.53129
CCG004288	---NA---	-0.351316	-0.295915	-1.54799	-4.51461
CCG004295	Endochitinase 1 [Morus notabilis]	0.462513	3.45052	3.75645	2.61376
CCG004300	NAC domain-containing [Ricinus communis]	2.90162	1.02893	0.50208	1.12856
CCG004301	cytokinin riboside 5 -monophosphate phosphoribohydrolase LOG5-like	4.37492	7.91639	5.24024	5.18174
CCG004302	expansin-like family [Populus trichocarpa]	0.898702	0.274597	-0.765636	-1.51624
CCG004305	G2 mitotic-specific cyclin-2-like	0.19448	-0.627388	-2.87981	-5.15104
CCG004308	zinc finger ZAT3	3.25609	-2.93358	1.05398	3.9071
CCG004309	NLP2-like [Vitis vinifera]	-1.10871	-2.05792	-1.872	-3.36357
CCG004321	Zinc ion binding isoform 1 [Theobroma cacao]	0.0326886	0.493049	0.298419	1.23907
CCG004323	Phosphoglycerate mutase family [Theobroma cacao]	-0.0838216	0.769247	1.32068	0.595809
CCG004326	ethylene-responsive transcription factor ERF034	-0.0211629	-0.924299	-1.61022	-2.67742
CCG004331	pentatricopeptide repeat-containing chloroplastic	4.10274	2.30618	1.59122	2.82932
CCG004333	carotenoid cleavage dioxygenase 7	-0.916331	-7.79554	-3.37996	-0.452609
CCG004341	---NA---	-0.0588331	-0.0601582	-0.441254	-1.02672
CCG004342	5-methyltetrahydropteroyltriglutamate--homocysteine methyltransferase	0.169338	-0.584484	-2.04067	-0.653979
CCG004344	inactive RESTRICTED TEV MOVEMENT 2-like	0.323082	0.543834	-1.29579	-3.71198
CCG004345	inactive RESTRICTED TEV MOVEMENT 2-like	-0.224238	-0.0399565	-0.608609	-5.35306
CCG004346	transcription factor RAX3-like	2.54176	2.16437	1.94865	0.726019
CCG004356	hepatoma-derived growth factor-related 2-like isoform X1 [Vitis vinifera]	-0.240678	-1.475	-2.85332	-0.835051
CCG004357	transcription factor bHLH30-like	-0.165549	2.5095	3.05496	2.09274
CCG004358	beta carbonic anhydrase chloroplastic-like isoform X3	0.833259	5.48939	6.00398	4.24268
CCG004360	DNA-binding ESCAROLA	-0.794408	2.49013	2.51001	2.81534
CCG004361	---NA---	2.00887	3.8368	4.44542	5.16066
CCG004364	ASPARTIC PROTEASE IN GUARD CELL 2	-1.12452	-4.11052	-5.171	-6.66579
CCG004366	mitochondrial uncoupling 5-like	-0.442115	-1.9069	-3.23256	-0.347138
CCG004369	RING finger 214 isoform 1 [Theobroma cacao]	0.0385966	0.797736	1.21592	0.696973
CCG004370	Pesticidal crystal cry8Ba [Gossypium arboreum]	0.0803203	-0.234925	-1.55026	-1.76735
CCG004375	cyclin d2 family [Populus trichocarpa]	-0.551597	-2.55124	-5.43629	-3.34324
CCG004384	transport inhibitor response 1	0.0622571	-0.426855	-1.09813	-1.36869
CCG004385	---NA---	1.72132	-0.569183	-1.74203	-2.39556
CCG004388	probable phosphatase 2C 55	0.405709	1.30211	1.47264	1.34405
CCG004391	MLO 11 isoform X1 [Pyrus x bretschneideri]	-0.0155285	-1.90686	-2.94294	-1.36847
CCG004402	DNA replication complex GINS PSF3-like	-0.322504	-0.976037	-4.72458	-2.3782
CCG004406	phosphoinositide-specific phospholipase C family [Populus trichocarpa]	0.192285	0.274554	0.513925	-1.0776
CCG004407	auxin response factor 19-like	0.131662	-1.63688	-2.96253	-1.52509
CCG004408	CCAAT enhancer-binding zeta-like	-0.346255	-1.68865	-0.891372	-0.0302823
CCG004409	40S ribosomal SA-like	-0.0455626	-0.706843	-1.32629	-0.394879
CCG004412	chloroplast import receptor p36 family [Populus trichocarpa]	0.0361502	1.55105	3.21229	0.752987
CCG004414	unnamed protein product	-0.489811	-0.724366	-2.09016	-2.26945
CCG004417	transmembrane [Medicago truncatula]	-6.62618	-6.37802	-3.39791	-6.47463
CCG004421	receptor kinase HSL1	0.00244616	-0.0900707	-1.56612	-0.910134
CCG004427	notum homolog isoform X2 [Malus domestica]	-0.0597014	-0.865803	-1.14864	-1.70006
CCG004429	OTU domain-containing DDB_G0284757 isoform X1 [Cucumis melo]	-0.0267876	-1.18251	-0.480539	-0.892512
CCG004430	---NA---	0.230541	-0.832722	-1.43223	-2.5725
CCG004431	syntaxin-132-like	-0.0505677	-0.644136	-0.770098	-1.33487
CCG004434	zinc finger ZAT5-like	-0.882183	-0.059963	-1.29296	-2.25394
CCG004436	Aquaporin TIP1-1 [Gossypium arboreum]	0.0336141	0.176523	-0.572665	-2.49519
CCG004437	RING finger and CHY zinc finger domain-containing 1-like isoform X1 [Nicotiana sylvestris]	0.960127	3.24337	1.89317	0.426081
CCG004439	bifunctional monodehydroascorbate reductase and carbonic anhydrase nectarin-3-like	0.429638	1.39654	0.0524689	2.38998
CCG004441	probable pectate lyase 12	-0.117617	-2.32318	-4.15481	-5.42143
CCG004447	uncharacterized membrane YMR155W-like	-0.255869	0.677048	1.22231	3.99213
CCG004448	heparan-alpha-glucosaminide N-acetyltransferase-like	-1.28547	-0.81887	-2.89915	-3.00456
CCG004451	E3 ubiquitin- ligase RFWD3	-0.0342944	-1.2815	-2.29675	-1.08368
CCG004452	xyloglucan endotransglucosylase hydrolase 32 precursor [Populus trichocarpa]	-0.319851	0.217221	-0.799759	-3.38812
CCG004456	S-adenosylmethionine synthase 2 [Morus notabilis]	0.068263	-0.297377	-2.94108	-1.76643
CCG004457	translation initiation factor IF-2	0.331419	1.15781	-0.537342	-0.777743
CCG004458	B3 domain-containing At5g66980 isoform X1	-0.439739	-1.50157	-1.23376	-0.932196
CCG004460	aspartic ase CDR1-like	1.52734	-0.0177772	-1.26053	-1.60886
CCG004462	PREDICTED: uncharacterized protein LOC102666935 [Glycine max]	0.00943596	1.55178	1.85599	1.42369
CCG004464	glycosyl transferase family 1 family [Populus trichocarpa]	1.11422	1.34467	0.906604	2.04656
CCG004465	Major facilitator superfamily isoform 1 [Theobroma cacao]	-1.28757	3.64104	5.14628	2.57323
CCG004468	xylosyltransferase 2	1.18111	3.86788	3.39484	1.74385
CCG004472	isoflavone 2 -hydroxylase-like	2.708	7.85549	8.70095	7.72955
CCG004475	cytochrome P450 81D11-like	2.57864	5.75806	6.16903	4.92957
CCG004476	isoflavone 2 -hydroxylase-like	NA	6.02479	6.25473	4.47328
CCG004482	alpha-L-arabinofuranosidase 1-like	-0.131187	-0.357456	-0.459115	-1.90087
CCG004487	Transducin WD40 repeat-like superfamily isoform 3 [Theobroma cacao]	0.00110247	-0.46335	-1.10129	-0.0906278
CCG004494	VQ motif-containing family [Populus trichocarpa]	1.12765	1.39918	1.9588	1.48509
CCG004495	polyglutamine-binding 1-like isoform X1 [Citrus sinensis]	0.0712809	0.914141	1.11744	0.713042
CCG004499	Zinc finger family isoform 1 [Theobroma cacao]	0.152024	-0.780487	-1.21061	-1.48119
CCG004502	X-linked retinitis pigmentosa GTPase regulator-interacting 1-like	0.0894895	0.35268	-0.734138	-1.12973
CCG004503	Werner Syndrome-like exonuclease	-0.438216	0.0311402	-0.354069	1.646
CCG004505	kinase and PP2C-like domain-containing	0.061049	-0.431316	-1.16832	-0.257455
CCG004508	cytochrome P450 98A2	-0.367551	-0.217155	-0.687686	-1.36754
CCG004509	cytochrome P450 98A2	-0.298854	-0.0644299	-0.461832	-1.22641
CCG004510	70 kDa peptidyl-prolyl isomerase-like	0.109061	-1.6438	-1.20606	-2.4343
CCG004511	WAT1-related At5g07050-like	-0.557606	-3.0764	-6.93061	-5.88359
CCG004515	exocyst complex component SEC15A	-0.648044	0.859209	0.648325	1.54706
CCG004519	R3H domain-containing 2 [Vitis vinifera]	0.11031	0.561921	1.29146	0.595669
CCG004523	geraniol 8-hydroxylase-like	0.502272	-0.31556	-1.56954	-0.629343
CCG004524	G2 mitotic-specific cyclin S13-7-like	-0.776014	-3.28167	-4.96401	-4.62807
CCG004525	---NA---	0.307662	-0.769147	-1.34157	-2.07131
CCG004526	ABC transporter C family member 2-like isoform X1 [Beta vulgaris vulgaris]	1.81596	0.351953	-0.662445	0.603462
CCG004527	stomatal closure-related actin-binding 3 [Cucumis sativus]	-0.183112	-1.55676	-2.58266	-2.46653
CCG004528	---NA---	0.732326	-1.67789	-1.54107	-2.29089
CCG004529	Beta-6 tubulin [Theobroma cacao]	0.0868057	-0.851199	-2.98097	-2.42762
CCG004530	probable mediator of RNA polymerase II transcription subunit 26b	0.864492	2.0702	2.44192	1.48669
CCG004534	SWI SNF-related matrix-associated actin-dependent regulator of chromatin subfamily A member 3-like 1	1.34454	1.71131	1.76159	2.43451
CCG004535	BAHD acyltransferase At5g47980-like	2.2125	1.78029	0.473806	1.08983
CCG004538	serine carboxypeptidase-like 45	0.421256	0.442303	2.39361	1.87823
CCG004539	serine carboxypeptidase-like 45	0.947539	0.669309	2.79503	2.23127
CCG004540	serine carboxypeptidase-like 45	0.0767076	-0.368139	1.00129	0.915462
CCG004541	serine carboxypeptidase-like 45	0.239664	1.16174	2.18943	0.861005
CCG004542	10 kDa chaperonin-like	0.0883468	-0.775879	-2.87832	-0.946937
CCG004544	hydroxymethylglutaryl- mitochondrial isoform X2 [Vitis vinifera]	0.351737	0.837447	2.2557	0.608525
CCG004545	3-oxoacyl-[acyl-carrier- ] chloroplastic-like	1.53856	1.052	0.565108	0.595431
CCG004546	probable auxin efflux carrier component 1b	-0.306434	-1.35336	-0.879025	0.230471
CCG004547	transcription factor bHLH106-like	0.745541	1.29581	0.632272	1.19948
CCG004549	PREDICTED: uncharacterized protein LOC105127599 isoform X2	-0.103	-1.52905	-3.4462	-1.9831
CCG004553	F-box family isoform 1 [Theobroma cacao]	1.28944	0.187672	-0.383243	0.160668
CCG004555	pentatricopeptide repeat-containing mitochondrial-like	-0.0574655	-0.832435	-1.45033	0.581394
CCG004557	alpha-xylosidase 2	0.739348	0.889679	0.901403	2.48979
CCG004558	DNA gyrase subunit chloroplastic mitochondrial-like	0.0997869	-0.501686	-1.92403	0.0886895
CCG004559	microtubule-associated 70-2-like	0.582065	-0.0428612	-2.05279	-0.802031
CCG004560	TGACG motif-binding factor 6 isoform 1 [Theobroma cacao]	0.0679752	0.75155	1.281	1.55691
CCG004561	sigma factor binding chloroplastic-like	-1.38567	-0.748287	0.0870214	-0.896051
CCG004566	probable LRR receptor-like serine threonine- kinase At1g51880	0.868543	1.00928	1.58714	-0.271004
CCG004571	LRR receptor-like serine threonine- kinase [Morus notabilis]	-1.11613	-0.251611	-0.983334	-3.81319
CCG004574	LRR receptor-like serine threonine- kinase [Morus notabilis]	-1.66498	-2.45038	-2.56546	-2.79721
CCG004576	BRASSINOSTEROID INSENSITIVE 1-associated receptor kinase 1 [Ricinus communis]	0.5388	1.08157	1.48935	0.124561
CCG004578	LRR receptor-like kinase plant	-1.18029	-2.14034	-1.37856	-1.47376
CCG004579	BRASSINOSTEROID INSENSITIVE 1-associated receptor kinase 1 [Ricinus communis]	0.566664	1.06377	1.36045	0.133603
CCG004580	LRR receptor-like serine threonine- kinase [Morus notabilis]	0.764075	1.014	1.66673	0.484722
CCG004581	LRR receptor-like serine threonine- kinase [Morus notabilis]	-1.02673	-1.37702	-2.514	-4.02343
CCG004582	BRASSINOSTEROID INSENSITIVE 1-associated receptor kinase 1 [Ricinus communis]	-1.64506	-1.62726	-2.55635	-1.72748
CCG004583	LRR receptor-like serine threonine- kinase [Morus notabilis]	-1.3203	-1.44109	-1.98064	-2.53246
CCG004585	transcription factor bHLH87	0.697392	0.34923	-1.92425	-2.74664
CCG004587	EARLY FLOWERING 3	-0.707557	-0.317168	0.0212934	-1.50613
CCG004590	IAA-amino acid hydrolase ILR1-like 4	2.19189	2.73131	2.66332	2.90614
CCG004592	40S ribosomal S30 [Malus domestica]	-0.409952	-1.38101	-1.76978	-0.406629
CCG004594	PREDICTED: uncharacterized protein LOC104596511 isoform X3	2.31172	0.839472	0.756375	2.75209
CCG004596	mannose-binding lectin superfamily	-0.0169192	0.295922	-1.5351	-1.4797
CCG004598	anoctamin At1g73020 isoform X1	0.0937991	-0.291968	-1.25266	-0.553268
CCG004600	hypothetical protein JCGZ_24809	1.69662	1.77348	2.37337	2.83752
CCG004601	60S ribosomal L28-2	-0.0484804	-0.416784	-1.05628	0.0812325
CCG004611	ENHANCER OF AG-4 2	1.35612	2.35084	1.07703	1.41289
CCG004617	phospholipase D epsilon	-0.129725	1.22664	0.826443	-0.00562972
CCG004618	calcineurin B 10 isoform X2	0.213738	1.45918	1.45717	0.375629
CCG004620	3-epi-6-deoxocathasterone 23-monooxygenase-like isoform X1	-0.217705	-1.66412	-3.41638	-3.12199
CCG004623	beta-galactosidase 1	0.273965	-0.417345	-0.755115	-1.91981
CCG004624	[Theobroma cacao]	0.487656	1.22718	1.04167	1.26173
CCG004627	WD-40 repeat-containing MSI4-like	0.0833793	-0.304048	-1.33782	-0.886862
CCG004630	receptor-like serine threonine- kinase ALE2	-0.0469983	-0.954923	-1.35603	-0.760812
CCG004631	YLS9 [Malus domestica]	-0.349519	-1.30141	-2.81806	-3.6099
CCG004632	chaperonin CPN60-like mitochondrial	-0.0163286	-1.18939	-1.88992	-0.0907288
CCG004636	zinc finger NUTCRACKER [Prunus mume]	-1.25061	-1.71396	-1.11482	-0.949114
CCG004639	Glycosyl hydrolases family 32 isoform 1 [Theobroma cacao]	1.48663	2.71174	3.00697	2.44859
CCG004642	heterogeneous nuclear ribonucleo 1 [Jatropha curcas]	0.106637	0.0206655	0.0747096	1.10017
CCG004643	serine threonine- phosphatase 7 long form homolog isoform X1 [Malus domestica]	0.067287	1.17366	1.2092	1.52519
CCG004647	50S ribosomal L34 [Morus notabilis]	-0.0423638	-1.07938	-0.776851	-0.62232
CCG004650	IQ-DOMAIN 1-like	0.133551	-1.44428	-3.21321	-3.33648
CCG004652	plant F1L3-4 [Medicago truncatula]	-0.300645	-0.733849	-1.21299	-1.06228
CCG004653	EPIDERMAL PATTERNING FACTOR 3 [Cucumis melo]	2.95045	0.324732	-1.48953	-4.01373
CCG004655	phosphatase 2C 16-like [Pyrus x bretschneideri]	1.02053	1.54534	1.56517	0.847494
CCG004662	hypothetical protein L484_013472 [Morus notabilis]	0.655058	1.47712	1.31631	1.67469
CCG004664	phospholipid-transporting ATPase 4	0.982677	1.23508	1.33015	2.12574
CCG004665	coatomer subunit zeta-1-like	0.101982	-0.630578	-1.27677	-0.62888
CCG004667	probable terpene synthase 12	3.74165	2.61475	4.27445	1.59702
CCG004668	probable terpene synthase 12	5.24458	3.68981	5.48975	4.10965
CCG004670	60S ribosomal L18a	0.0124321	0.605903	1.03756	0.21279
CCG004673	threonine chloroplastic-like	-0.0780274	-0.227668	-1.13736	0.426155
CCG004677	solute carrier family 25 member 44-like	0.628224	1.35196	1.28304	0.522166
CCG004679	nuclear transcription factor Y subunit A-3-like isoform X1 [Prunus mume]	-0.451496	0.920617	1.77155	0.322199
CCG004689	NAD(P)-binding Rossmann-fold superfamily [Theobroma cacao]	-1.14854	1.29659	2.29675	0.669714
CCG004693	tannin-related R2R3 MYB transcription partial	0.399881	-1.39978	-0.716998	0.551554
CCG004694	transcription factor TT2-like	-0.852632	-3.21443	-3.5634	-0.704362
CCG004697	transcription factor WER-like	-0.409698	-2.63367	-2.80983	-0.768538
CCG004698	AP2-like ethylene-responsive transcription factor AIL1	-0.270017	-2.0093	-3.802	-2.24626
CCG004699	leucine-rich repeat extensin 3	-0.239417	-0.658037	-1.15347	-0.563919
CCG004701	TAZ zinc finger family [Populus trichocarpa]	0.291772	2.19895	1.58544	1.67699
CCG004703	Disease resistance RPM1 [Morus notabilis]	3.20591	0.889356	-0.26557	1.20092
CCG004704	nodulation-signaling pathway 1 -like	-1.14865	-1.80883	-1.98073	-0.95598
CCG004706	Serine rich [Medicago truncatula]	0.202767	1.08926	0.386103	1.04078
CCG004708	probable GTP diphosphokinase chloroplastic	0.36674	0.977697	1.20704	0.440466
CCG004710	receptor kinase At1g72540	-1.30616	0.627357	2.04709	1.73011
CCG004712	linoleate 13S-lipoxygenase 3- chloroplastic	3.5945	3.08363	3.64148	4.24903
CCG004713	conserved hypothetical protein [Ricinus communis]	-1.63526	-1.00799	-1.86899	-3.77097
CCG004715	subtilisin-like protease	-0.993346	-2.23746	-1.63427	-0.801246
CCG004716	DUF1677 family [Medicago truncatula]	-1.24368	0.210536	0.65589	-0.665885
CCG004720	transmembrane 87A	-0.0354464	-0.559605	-1.41026	-1.07226
CCG004723	TIFY 10A	2.43571	2.6435	3.62122	3.48801
CCG004727	DNA binding [Ricinus communis]	0.0222129	0.682561	1.19778	1.30334
CCG004730	zinc finger CCCH domain-containing 62-like [Pyrus x bretschneideri]	-0.173541	-2.0847	-4.03097	-2.89099
CCG004733	unnamed protein product	0.0373388	-0.0301512	-2.13345	-3.20524
CCG004737	probable methyltransferase PMT26-like isoform X1 [Glycine max]	0.253803	-0.842197	-1.66194	-1.01764
CCG004738	trichome birefringence-like 14 isoform X1 [Nelumbo nucifera]	-0.383688	-0.976425	-1.10443	-0.36334
CCG004740	PREDICTED: uncharacterized protein LOC101295653	-0.84	-0.401286	1.09656	1.48071
CCG004741	pentatricopeptide repeat-containing At2g21090-like	-0.0819775	-0.240053	-1.31557	-0.0348798
CCG004742	pentatricopeptide repeat-containing At2g13600	-0.607146	-1.056	-1.21915	0.364769
CCG004743	ABC transporter G family member 5-like	-1.49696	-4.23665	-3.50639	-2.84178
CCG004744	Histone deacetylase 14	-0.23872	-0.574375	-0.74301	-1.18099
CCG004745	NAC transcription factor 25-like	-0.572236	-2.79399	-6.28573	-3.33415
CCG004746	caffeic acid O-methyltransferase	-0.469222	-3.98215	-4.28049	-2.98821
CCG004748	2-oxoisovalerate dehydrogenase subunit alpha mitochondrial isoform X1 [Phoenix dactylifera]	0.123846	2.37631	3.08064	0.753896
CCG004749	SAL1 phosphatase-like	-0.0376171	-0.83222	-0.827675	-1.33525
CCG004751	U-box domain-containing 26-like	0.118212	2.68972	2.55866	3.19569
CCG004752	TPR repeat [Medicago truncatula]	-0.554005	-1.26399	-0.519182	0.130177
CCG004754	Uncharacterized protein TCM_001500 [Theobroma cacao]	0.258364	1.21961	1.39874	1.21669
CCG004755	hypothetical protein B456_012G035400	2.86984	2.10056	1.8067	2.44038
CCG004756	probable polygalacturonase	1.89114	0.558014	0.215424	0.516849
CCG004757	Photosystem I reaction center subunit chloroplastic	0.0146164	-0.650819	1.27782	-1.85026
CCG004758	SWIM zinc finger family [Populus trichocarpa]	-0.343096	-0.954152	-0.468199	1.09145
CCG004761	GDP-mannose transporter GONST1 isoform X1 [Jatropha curcas]	0.705671	0.97329	1.41827	1.44669
CCG004770	SENSITIVE TO PROTON RHIZOTOXICITY 1-like	0.768547	1.48289	0.569653	0.664582
CCG004774	Ankyrin repeat-containing [Theobroma cacao]	-2.32147	-4.93955	-8.01534	-5.62251
CCG004776	exocyst complex component EXO70A1-like	1.0089	3.41923	2.41738	4.23751
CCG004777	exocyst complex component EXO70A1-like	0.213745	2.20455	2.65335	3.28016
CCG004786	PREDICTED: uncharacterized protein LOC105113035	0.0686244	-1.04625	-1.87973	-0.756426
CCG004787	calcium-transporting ATPase endoplasmic reticulum-type-like	-0.536066	-2.67364	-2.67394	-1.01249
CCG004788	calcium-transporting ATPase endoplasmic reticulum-type-like	-0.218105	-1.92374	-2.06198	-0.889792
CCG004791	Retinoic acid-induced 3	1.18691	0.593288	0.645516	0.856623
CCG004797	probable receptor kinase At1g80640 isoform X2	-1.0337	-2.73122	-2.31605	-3.03498
CCG004801	ethylene-responsive transcription factor ERF003-like	-0.449346	3.49626	0.516901	0.892579
CCG004805	deSI At4g17486	-0.913763	-2.97887	-5.15807	-5.01604
CCG004808	histone-lysine N- H3 lysine-79 specific-like isoform X2	-0.0557869	-0.629379	-1.83213	-0.175436
CCG004809	Mitochondrial glyco family [Theobroma cacao]	0.0439806	-1.58631	-2.50089	-0.0927327
CCG004810	zinc finger 3-like	0.542269	-1.1578	-7.28734	-3.56273
CCG004818	Germin subfamily 3 member 2	-0.13932	-2.49496	-3.46907	-3.36626
CCG004819	XH XS domain-containing [Theobroma cacao]	-0.0995116	-0.675663	-1.25628	-0.712189
CCG004821	3-isopropylmalate dehydrogenase chloroplastic	-0.714853	-1.10826	-0.821088	-0.738487
CCG004823	40S ribosomal S12-1 [Populus trichocarpa]	-0.0163154	-0.664862	-1.62374	-0.283305
CCG004825	cinnamoyl- reductase 1-like	1.34763	0.311366	-0.626452	0.516781
CCG004826	metal transporter Nramp6-like [Prunus mume]	0.287008	1.19439	1.29925	1.80715
CCG004827	CBL-interacting kinase 25 [Theobroma cacao]	-0.766684	-1.19063	-0.178872	-1.82894
CCG004828	WRKY transcription factor 40 family [Populus trichocarpa]	4.4636	3.04473	3.73034	3.69977
CCG004830	phosphatidyl-N-methylethanolamine N-methyltransferase	-0.335706	-1.39594	-2.20332	-0.760459
CCG004831	probable N-acetyltransferase HLS1	0.441084	-1.13323	-4.67806	-3.36493
CCG004834	LOW PSII ACCUMULATION chloroplastic	0.115341	0.976886	1.17433	-0.054525
CCG004835	cyclic nucleotide-gated ion channel 8 isoform X1	2.67686	2.66211	1.25355	2.60785
CCG004836	receptor kinase At1g80870	-0.449539	-0.664272	-0.927223	-1.30978
CCG004837	Lamin [Morus notabilis]	-0.17937	-1.4535	-2.16949	-3.14146
CCG004840	chaperone dnaJ chloroplastic-like	1.40011	2.84448	3.35472	2.24168
CCG004841	Hydroxycinnamoyl- shikimate quinate hydroxycinnamoyl transferase isoform 1 [Theobroma cacao]	0.614719	1.10111	0.513698	-0.0334794
CCG004842	Hydroxycinnamoyl- shikimate quinate hydroxycinnamoyl transferase isoform 1 [Theobroma cacao]	0.713185	1.26665	0.83418	0.173784
CCG004843	---NA---	-1.57259	-3.84615	-2.09861	-2.02563
CCG004844	heat shock 70 cognate [Populus trichocarpa]	0.557969	2.07779	0.0959239	0.803547
CCG004848	UPF0481 At3g02645	1.55537	3.90564	4.81111	6.93454
CCG004860	Uncharacterized protein TCM_027550 [Theobroma cacao]	1.39241	2.91179	2.75822	1.39701
CCG004861	ASPARTIC PROTEASE IN GUARD CELL 2	0.0677408	-2.31502	-4.2166	-5.18127
CCG004862	probable folate-biopterin transporter 3	0.324824	0.932534	2.07898	1.85534
CCG004864	tubby 8	-0.707736	-2.67014	-5.98063	-2.21529
CCG004867	trimethylguanosine synthase	-0.161358	0.850697	2.2809	1.5821
CCG004868	peptidoglycan-binding domain-containing family [Populus trichocarpa]	1.04579	4.8352	5.13471	5.30699
CCG004869	SPX domain-containing membrane At4g22990 [Vitis vinifera]	0.271103	0.0649535	-2.03889	-0.868815
CCG004872	peroxisome biogenesis 16 isoform X1	0.0131506	0.570853	1.25787	-0.163818
CCG004873	transcription factor TCP9-like	-0.615382	-0.0216277	-0.0113521	-1.22119
CCG004874	phospholipase D gamma 1-like	-0.0260358	1.03211	1.78743	0.360154
CCG004875	phospholipase D gamma 1-like	0.121407	0.993929	1.18628	0.959667
CCG004876	subtilisin-like protease [Vitis vinifera]	-0.474876	-1.45853	-1.53355	-3.99521
CCG004877	xylem serine ase 1	0.361407	0.490109	-1.9205	-3.73821
CCG004882	probable fructokinase-7 isoform X1 [Vitis vinifera]	4.47971	3.6937	1.5878	3.30954
CCG004886	polygalacturonate 4-alpha-galacturonosyltransferase [Jatropha curcas]	-0.195046	-1.42578	-1.99031	-1.42054
CCG004892	Histidine-containing phosphotransfer 1 isoform 1 [Theobroma cacao]	-0.187598	-1.0484	-1.79743	-1.97696
CCG004896	Nitric oxide synthase-interacting [Theobroma cacao]	0.488926	1.37052	-0.160324	-0.69729
CCG004898	Nitric oxide synthase-interacting [Theobroma cacao]	-0.0629586	0.719365	-0.254953	-1.42236
CCG004899	ABC transporter D family member 1-like isoform X2	0.131522	0.847086	1.00393	0.599725
CCG004901	ARM-repeat Tetratricopeptide repeat (TPR) isoform 1 [Theobroma cacao]	-0.23106	-1.26604	-1.77585	-1.19583
CCG004902	Mediator of RNA polymerase II transcription subunit [Theobroma cacao]	-0.845309	-1.73272	-2.04699	-2.0094
CCG004904	spinster [Morus notabilis]	-0.102034	-0.909393	-1.00893	-1.12724
CCG004905	spinster [Morus notabilis]	-0.338042	-0.852688	-4.23231	-2.788
CCG004907	spinster [Morus notabilis]	-0.911809	0.570079	1.51637	-0.702909
CCG004908	spinster [Morus notabilis]	-0.864421	-1.45075	-1.13536	-1.35461
CCG004909	Lipase PLAT LH2 family [Theobroma cacao]	0.276965	-1.14242	-2.54518	-2.43943
CCG004910	inactive TPR repeat-containing thioredoxin TTL3-like	-1.54296	-0.288282	-0.28397	0.666826
CCG004914	VQ motif-containing family [Populus trichocarpa]	-0.661577	0.773368	0.407718	1.21274
CCG004917	U-box domain-containing 43	-0.435914	-1.89772	-2.33423	-1.07128
CCG004918	acyl-coenzyme A oxidase peroxisomal	-0.154153	1.68898	2.67043	1.2124
CCG004919	PREDICTED: uncharacterized protein LOC100853094	-0.36501	-0.694495	-2.89325	-1.55124
CCG004921	ethylene-responsive transcription factor RAP2-4-like	0.776563	0.425059	0.994789	1.22546
CCG004924	DOWNSTREAM OF FLC-like	-0.822889	-2.86673	-6.83989	-5.56816
CCG004925	UPSTREAM OF FLC-like	-0.459265	0.440339	-1.59386	-0.393161
CCG004928	Thioesterase superfamily isoform 1 [Theobroma cacao]	0.0553563	-0.694188	-2.00111	-0.98656
CCG004929	Thioesterase superfamily [Theobroma cacao]	-1.91928	-2.91234	-2.29697	-2.58736
CCG004930	inositol-3-phosphate synthase	1.35459	-0.117396	-2.00402	-0.587309
CCG004931	chaperone dnaJ chloroplastic-like	-1.01167	1.95086	2.54086	1.07951
CCG004933	sulfate transporter -like	0.0544323	-2.01322	-4.45254	-4.09844
CCG004934	sulfate transporter -like	-0.0109081	-2.01125	-3.95355	-3.43458
CCG004935	NEN4 isoform X1	0.455429	0.551951	-0.768489	-1.42323
CCG004936	trafficking particle complex subunit 12 [Pyrus x bretschneideri]	0.107769	0.296616	0.175443	1.04314
CCG004937	L-ascorbate oxidase-like	3.4083	4.10743	4.43419	5.87574
CCG004938	L-ascorbate oxidase-like	1.50929	1.64642	2.0175	3.22073
CCG004941	[Ricinus communis]	0.860797	0.588224	1.7348	1.65891
CCG004942	[Ricinus communis]	-1.08395	-3.40171	-3.42783	-5.51764
CCG004943	[Ricinus communis]	0.859511	3.09919	3.01958	5.21095
CCG004947	[Ricinus communis]	3.12353	-0.384839	-0.800223	-1.26005
CCG004952	[Ricinus communis]	1.77562	-0.805348	-6.63943	-6.70177
CCG004958	translation initiation factor IF- chloroplastic-like	1.47134	1.49501	2.27208	0.612611
CCG004960	kinesin motor family [Populus trichocarpa]	0.697566	-0.086111	-2.17215	-2.07075
CCG004967	Protoheme IX farnesyltransferase	0.118319	0.686831	1.3233	0.372409
CCG004969	DNA mismatch repair MSH6	-0.679448	-1.19001	-1.13867	-0.920346
CCG004973	eukaryotic translation initiation factor 3 subunit A-like	-0.37206	-1.00919	-1.66896	-2.46772
CCG004975	cinnamoyl- reductase 1-like	0.0540385	2.83656	2.85487	1.50267
CCG004976	cinnamoyl- reductase 1-like	0.241734	1.31659	1.35648	0.440431
CCG004986	uncharacterized LOC103453287 [Malus domestica]	0.0492192	-0.330259	-1.36021	-1.80516
CCG004991	auxin-responsive IAA14	0.055918	-0.69018	-2.99716	-4.37392
CCG004993	AUX IAA transcriptional regulator family [Theobroma cacao]	1.109	0.369471	-0.814254	-0.0858163
CCG004995	ion channel POLLUX-like 2	-0.28853	-1.17173	-1.39884	-1.23522
CCG004996	lysM domain receptor-like kinase 4	0.854219	0.969121	1.10476	1.40942
CCG004999	CBL-interacting serine threonine- kinase 4-like	-1.43817	-1.35832	-1.1201	-1.58161
CCG005001	U-box domain-containing 44-like [Populus euphratica]	1.34202	0.575723	0.673763	1.00903
CCG005002	3-ketoacyl- synthase 11-like	0.340731	0.899565	1.02581	1.29959
CCG005004	GDP-mannose 3,5-epimerase 2	0.0441886	-1.39197	-2.10984	-1.68324
CCG005008	pyruvate kinase isozyme chloroplastic	0.0235455	-0.53486	-1.01207	-0.753668
CCG005012	PREDICTED: uncharacterized protein LOC100256346 isoform X1	1.21528	2.37511	-0.221903	0.335442
CCG005013	2-methyl-6-phytyl-1,4-hydroquinone chloroplastic [Nelumbo nucifera]	0.117965	1.87584	2.71747	0.588985
CCG005014	calmodulin 11	2.32959	2.41833	1.65781	2.27837
CCG005015	probable GPI-anchored adhesin PGA55	-0.173422	-1.67575	-4.4651	-3.43498
CCG005016	calcium-transporting ATPase plasma membrane-type	1.91669	3.49015	4.12569	2.68678
CCG005018	calcium-transporting ATPase plasma membrane-type	3.39093	2.00724	1.37658	2.12225
CCG005023	argonaute 10 [Fragaria vesca vesca]	0.0184899	-0.636328	-1.21372	-1.44487
CCG005024	Serine threonine- kinase PAK 6 [Morus notabilis]	0.415486	0.275911	0.616406	1.05218
CCG005025	meiotic recombination DMC1 homolog	1.04085	0.313609	0.964364	1.085
CCG005026	stem-specific TSJT1	0.944073	1.7444	0.952665	0.199252
CCG005028	perakine reductase-like	0.0645113	0.100153	-0.135432	-1.55572
CCG005029	early light-induced chloroplastic-like [Eucalyptus grandis]	-0.180009	-0.525384	-2.65815	-2.7218
CCG005030	perakine reductase-like	-0.545546	-1.95498	-1.50465	-0.575041
CCG005031	early light-induced chloroplastic-like	-0.354779	-2.04653	-2.80555	-0.414465
CCG005032	aldo keto [Ricinus communis]	-0.31745	-0.816147	0.658605	1.47109
CCG005033	early light-induced chloroplastic-like	-0.24706	-1.6714	-1.9716	0.0408966
CCG005035	DNA binding isoform 3 [Theobroma cacao]	0.0036894	0.439253	-1.26123	-1.58683
CCG005036	heat stress transcription factor A-6b-like	1.01346	1.74395	-0.272827	-0.128801
CCG005037	1,2-dihydroxy-3-keto-5-methylthiopentene dioxygenase 2	0.511739	1.20075	1.33513	0.807248
CCG005040	chlorophyllase- chloroplastic [Fragaria vesca vesca]	-0.570371	-1.95186	-1.71744	-0.273518
CCG005043	Emb: isoform 1 [Theobroma cacao]	0.0932904	-0.0763722	-1.22997	-1.02761
CCG005044	lin-12-like isoform X1 [Populus euphratica]	-0.636912	-0.158326	-0.545706	-1.45325
CCG005045	IQ-DOMAIN 14-like	-0.878661	-2.11744	-3.3735	-5.43167
CCG005046	sulfate transporter -like	3.84961	6.66062	-0.396167	0.302769
CCG005047	sulfate transporter -like	-0.187092	-2.60471	-6.01268	-7.66884
CCG005051	transmembrane 56-B-like isoform X2 [Nelumbo nucifera]	-0.0748923	1.08109	1.14159	0.402736
CCG005052	Myb family transcription factor At1g14600-like	0.134563	7.03433	10.4668	8.98706
CCG005058	transcription factor JUNGBRUNNEN 1-like	5.05119	4.42652	4.49753	5.48252
CCG005063	Cytochrome P450 97B2 isoform 1 [Theobroma cacao]	0.526511	-1.02552	-0.903036	-0.9473
CCG005065	cytochrome P450 chloroplastic	-1.70899	-0.645764	-2.59272	-2.67031
CCG005067	VQ motif-containing family [Populus trichocarpa]	1.12749	0.97072	1.94295	2.31724
CCG005072	persulfide dioxygenase ETHE1 mitochondrial-like	-1.45106	-0.373	0.201962	-2.40298
CCG005073	aspartic ase nepenthesin-2-like	2.45623	2.93181	2.44239	2.34532
CCG005084	20S proteasome beta subunit B family [Populus trichocarpa]	0.0254223	-2.07653	-1.6166	-2.27248
CCG005087	Copine family isoform 1 [Theobroma cacao]	0.682879	1.96308	1.84386	1.3921
CCG005089	Cytochrome P450 [Morus notabilis]	0.446171	2.12053	4.31227	4.61196
CCG005090	petal differentiation and expansion group 2 [Theobroma cacao]	1.506	0.21	-0.718932	0.744275
CCG005091	Pentatricopeptide repeat superfamily isoform 1 [Theobroma cacao]	0.584454	0.00954493	-1.05354	0.515468
CCG005092		1.66539	1.77827	1.97884	1.88163
CCG005095	probable alpha-galactosidase B-like [Citrus sinensis]	0.00586505	0.444242	1.02616	-0.108131
CCG005096	sufE chloroplastic	-0.542187	2.51363	2.67638	2.85524
CCG005099	hypothetical protein POPTR_0010s06010g [Populus trichocarpa]	0.373014	-0.0393767	-1.63224	-1.33956
CCG005101	Transducin WD40 repeat-like superfamily [Theobroma cacao]	-0.0953395	0.770602	1.59807	0.330095
CCG005106	terminal ear1	-0.364604	-1.78079	-1.21664	-0.0870759
CCG005112	OSBP(oxysterol binding )-related 1D isoform 1 [Theobroma cacao]	-0.291269	-0.66463	-1.65354	-1.37639
CCG005116	T-complex 1 subunit epsilon	0.0197285	-0.578945	-1.27761	-0.227484
CCG005117	probable pectate lyase 5	1.27197	2.781	-2.24509	-1.47726
CCG005121	plastidic ATP ADP-transporter-like	0.0229885	1.4217	1.01277	1.47976
CCG005125	Alpha beta-hydrolase domain-containing isoform 1 [Theobroma cacao]	-0.194683	-1.63035	-2.77028	-1.29693
CCG005128	anion exchange family [Populus trichocarpa]	1.23621	3.8323	4.3605	4.20883
CCG005129	PREDICTED: uncharacterized protein LOC103940076	-0.297834	-0.116926	-0.524378	-1.37587
CCG005130	Agmatine deiminase	0.527362	-2.56847	-6.72053	-7.12127
CCG005133	acyl- thioesterase 2	-0.531518	-1.61781	-1.02955	-0.630785
CCG005135	periodic tryptophan 2 homolog	-0.382089	-1.55018	-1.10626	1.15388
CCG005139	late embryogenesis abundant D-7	0.658988	2.52015	1.0065	0.233975
CCG005141	zinc finger family [Populus trichocarpa]	-0.599714	-3.26528	-6.63705	-4.37277
CCG005142	aspartate-glutamate racemase family [Populus trichocarpa]	-0.450195	-1.09676	-0.789543	-0.752768
CCG005147	Galactose oxidase kelch repeat superfamily isoform partial [Theobroma cacao]	-0.531304	-1.73411	-0.852701	-1.31931
CCG005148	DNA replication complex GINS PSF1	-0.0672074	-0.496336	-1.35957	-0.988552
CCG005149	plant F18B13-26	0.246762	1.22004	1.52983	0.714332
CCG005151	peptide deformylase chloroplastic mitochondrial	0.0285684	-0.835784	-1.77868	-1.16137
CCG005152	DUF761 domain [Medicago truncatula]	-1.86444	-2.06633	-4.09187	-4.65508
CCG005153	lactoylglutathione [Ricinus communis]	0.520261	3.58064	3.65725	1.74342
CCG005154	lactoylglutathione [Ricinus communis]	0.372163	3.15844	2.96108	2.15029
CCG005157	lactoylglutathione [Ricinus communis]	-0.523087	4.36359	0.808812	-0.53889
CCG005159	cysteine-rich repeat secretory 60	-0.285823	-2.37916	-2.66408	-2.80246
CCG005160	kDa heat shock peroxisomal-like	0.31613	1.58388	1.62686	0.382981
CCG005161	probable inactive receptor kinase At1g48480	-0.167326	-0.791261	-1.2687	-0.909608
CCG005163	Myb domain 20 [Theobroma cacao]	1.22299	1.41699	2.11013	2.02797
CCG005166	glycosyl hydrolase family 17 family [Populus trichocarpa]	-0.678019	-3.18363	-5.67461	-4.20701
CCG005172	HMG-Y-related A-like	-0.120391	1.70827	1.41416	-0.780996
CCG005173	intracellular transport USO1-like	-0.0980249	-1.05618	-0.804513	-1.63883
CCG005175	RSI-1 [Glycine soja]	-0.242382	-1.05078	-2.78768	-2.14148
CCG005177	Geranylgeranyl pyrophosphate synthase 1 [Theobroma cacao]	-2.49556	-8.25555	-8.28896	-4.91084
CCG005178	glutathione S-transferase chloroplastic [Eucalyptus grandis]	0.413799	-0.542611	-2.17141	-0.854668
CCG005179	DELLA GAI-like	0.507796	0.251263	-0.52828	-1.31105
CCG005181	5 -AMP-activated kinase subunit beta-1 [Theobroma cacao]	0.0825149	1.09805	0.827248	-0.0118933
CCG005182	probable ADP-ribosylation factor GTPase-activating AGD11	1.74429	2.7265	2.6603	2.68299
CCG005194	3-isopropylmalate dehydratase large subunit	0.121237	1.52389	1.43176	0.484072
CCG005209	glucose-6-phosphate 1-epimerase	-1.58644	1.40592	2.09727	3.06931
CCG005218	DA1-related 1	-2.11973	2.97753	5.7991	3.35247
CCG005219	ABC transporter C family member 10-like [Vitis vinifera]	-0.634835	-2.14259	-1.70816	-1.40902
CCG005220	ABC transporter C family member 10-like [Vitis vinifera]	-0.180869	-1.94404	-2.84043	-2.51028
CCG005222	[Ricinus communis]	2.37537	-0.402572	-1.41928	-1.30215
CCG005226	Plasma [Theobroma cacao]	-0.408297	0.0978894	0.710608	1.04426
CCG005227	cation H(+) antiporter 18 [Pyrus x bretschneideri]	-2.47729	-1.99004	-2.0892	-1.44882
CCG005228	cation H(+) antiporter 18 [Pyrus x bretschneideri]	-0.729334	-2.78987	-4.5776	-2.63573
CCG005229	dirigent 5-like	-0.786697	-1.78509	-3.40548	-3.98613
CCG005230	disease resistance response 206-like	-1.07328	-3.07087	-6.90099	-9.4311
CCG005232	transcription [Ricinus communis]	-0.617019	1.62148	1.4442	0.713189
CCG005241	ATP binding [Ricinus communis]	0.511577	2.41005	2.49453	2.67629
CCG005243	probable LRR receptor-like serine threonine- kinase At4g36180	-0.511276	-2.67585	-3.87028	-1.88609
CCG005245	NAC domain-containing 7-like [Malus domestica]	0.0979577	-0.170788	-1.05989	-2.20817
CCG005258	hypothetical protein PRUPE_ppa009272mg [Prunus persica]	-0.84597	-0.916474	-0.936944	-1.3232
CCG005260	LMBR1 domain-containing 2 homolog A	0.952714	1.22335	0.618703	0.766206
CCG005262	pollen-specific SF21-like [Malus domestica]	-0.662207	-3.49811	-4.55065	-3.10999
CCG005263	multisubstrate pseudouridine synthase 7 isoform X1	0.0693481	-0.838	-1.48042	0.263635
CCG005265	40S ribosomal S3a	-0.00924446	-0.379084	-1.04663	-0.0678147
CCG005268	trihelix transcription factor GTL2	-0.326408	-1.19608	-1.91482	-2.73066
CCG005269	kinase family [Populus trichocarpa]	-0.142676	-0.428956	-2.97198	-2.32311
CCG005270	IQ-DOMAIN 14-like	-1.01834	-1.1128	0.937726	0.569894
CCG005274	probable ribose-5-phosphate isomerase chloroplastic	-0.303683	-0.69919	-1.07164	-0.0760274
CCG005276	ECERIFERUM 26-like	0.0660962	-0.355234	-4.34526	-1.58151
CCG005277	probable aldo-keto reductase 1	0.277082	0.878969	1.66859	1.0378
CCG005278	probable aldo-keto reductase 1	-0.213653	0.259205	1.04146	0.35145
CCG005280	probable aldo-keto reductase 1	-0.245703	0.908998	1.3629	0.604775
CCG005281	Auxin-induced PCNT115 [Medicago truncatula]	-0.120481	1.17768	0.0804728	0.183585
CCG005283	calmodulin 11	1.38419	2.083	2.40995	1.9801
CCG005285	Auxin-responsive IAA16	0.117139	0.309079	-0.434711	-1.1943
CCG005287	transcription factor UNE12-like isoform X2	-0.628992	-1.64312	-0.645102	-1.17735
CCG005290	light-inducible CPRF2	0.514344	2.23364	2.97276	1.70822
CCG005291	GDP-mannose 3,5-epimerase 1 [Theobroma cacao]	-0.11759	-0.784105	-1.56797	-0.605744
CCG005292	GDP-mannose 3,5-epimerase 2 [Musa acuminata malaccensis]	-0.303067	-1.90721	-2.19517	-0.735336
CCG005293	GDP-mannose 3,5-epimerase 2 [Musa acuminata malaccensis]	-0.629569	-1.45043	-3.67431	-1.90795
CCG005294	pathogenesis-related 4	0.939279	2.76627	4.32923	4.44543
CCG005295	hevein-like prepro -like	-0.0912429	2.392	3.45879	2.40797
CCG005296	E3 ubiquitin ligase DRIP2-like isoform X2	0.300421	0.822261	0.965782	1.16296
CCG005297	Retrovirus-related Pol poly from transposon TNT 1- partial	0.0377314	-0.787009	-1.10329	-0.281887
CCG005299	Ankyrin repeat family [Theobroma cacao]	0.181896	-0.34438	-2.54843	-0.30634
CCG005302	WRKY transcription factor 39 family [Populus trichocarpa]	0.624144	1.51933	2.96022	1.18852
CCG005304	histone H1-like	-0.85098	1.36898	1.55546	-0.445425
CCG005306	WVD2-like 1	0.00853012	0.638556	1.47794	1.24565
CCG005310	G-type lectin S-receptor-like serine threonine- kinase RLK1	0.0798105	-1.59185	-2.56819	-1.46044
CCG005315	TRANSPARENT TESTA 12-like	-0.356929	0.248453	1.62719	0.689806
CCG005320	serine carboxypeptidase-like 34-like	1.00167	3.11834	4.56022	3.94588
CCG005322	60S ribosomal L44 [Morus notabilis]	-0.0789151	1.01246	1.7356	1.88243
CCG005324	---NA---	1.06618	0.6717	1.62725	1.33852
CCG005339	pentatricopeptide repeat-containing mitochondrial	0.028656	-0.72068	-1.22895	-0.0322863
CCG005341	transcription factor TCP7-like	-0.101074	-2.74772	-2.33496	-2.35132
CCG005343	probable RNA helicase SDE3	0.0251357	0.330095	0.0312896	-1.74805
CCG005344	probable RNA helicase SDE3	-0.0236562	0.638737	0.0423085	-1.60382
CCG005347	probable RNA helicase SDE3	0.0204464	-0.0602493	0.107388	-1.01381
CCG005349	chloroplast iron superoxide dismutase [Dimocarpus longan]	-0.448187	-1.58944	-3.10941	-0.700185
CCG005351	conserved hypothetical protein [Ricinus communis]	0.305357	2.08052	0.635234	0.577475
CCG005355	Transmembrane 53	0.657229	0.585921	0.0911377	2.33352
CCG005357	GEM 4	-0.370065	0.228099	0.375213	1.79054
CCG005360	nudix hydrolase 1-like	0.520592	1.25008	0.772352	0.708735
CCG005361	phosphoenolpyruvate carboxylase 4-like	-0.0423664	1.59706	1.47087	-0.560939
CCG005362	ABC transporter G family member 21-like	0.688035	1.1968	0.0977522	-0.657305
CCG005365	probable isoprenylcysteine alpha-carbonyl methylesterase ICMEL1	0.640408	0.683154	0.428887	1.09395
CCG005366	phosphate transporter PHO1 homolog 1-like	-0.111147	-0.148223	-2.06606	-1.17227
CCG005368	lysine-rich arabinogalactan 19-like	0.0365361	-0.175205	-3.37206	-5.96305
CCG005370	HUA2 1 [Musa acuminata malaccensis]	-0.517412	0.564294	1.14244	0.620742
CCG005372	---NA---	-0.0776443	0.655143	0.688045	1.03081
[truncated: 8,740 more rows]

## Sheet: Table S3-2
Table S3-2. The differentially expressed genes (DEGs) of 1 hour vs Control
ID	baseMean	log2FoldChange	lfcSE	stat	pvalue	padj
CCG000015	4923.81	1.35621	0.164644	8.23721	1.76e-16	4.15e-15
CCG000019	23.3844	3.58166	0.86941	4.11965	3.79e-05	0.000275768
CCG000031	4844.77	1.26824	0.161223	7.86634	3.65e-15	7.85e-14
CCG000043	35.598	6.27593	1.1664	5.38062	7.42e-08	8.13e-07
CCG000065	55.6159	2.66889	0.49386	5.40415	6.51e-08	7.17e-07
CCG000071	73.8259	3.73414	0.733388	5.09163	3.55e-07	3.56e-06
CCG000082	863.552	1.35789	0.253366	5.35938	8.35e-08	9.07e-07
CCG000083	140.213	2.17061	0.306541	7.08096	1.43e-12	2.51e-11
CCG000087	763.183	-1.82563	0.244056	-7.48035	7.41e-14	1.44e-12
CCG000088	2257.48	-1.58993	0.219422	-7.246	4.29e-13	7.89e-12
CCG000096	601.2	-1.37288	0.2012	-6.82347	8.89e-12	1.46e-10
CCG000099	2369.38	2.68273	0.143755	18.6619	1.01e-77	2.33e-75
CCG000101	4173.43	1.39656	0.218614	6.38825	1.68e-10	2.45e-09
CCG000123	173.875	-1.27554	0.277863	-4.59055	4.42e-06	3.76e-05
CCG000124	149.403	-1.92462	0.331832	-5.79999	6.63e-09	8.23e-08
CCG000125	254.218	-2.15242	0.276094	-7.79596	6.39e-15	1.35e-13
CCG000130	3431.34	1.08947	0.150287	7.24926	4.19e-13	7.71e-12
CCG000137	57.0853	1.87054	0.577789	3.23742	0.00120618	0.00632029
CCG000167	269.574	1.28823	0.225213	5.72006	1.06e-08	1.29e-07
CCG000174	287.553	1.08837	0.225353	4.82962	1.37e-06	1.25e-05
CCG000199	101.345	1.80046	0.415711	4.33104	1.48e-05	0.000116663
CCG000215	7.13564	6.40853	1.91569	3.34529	0.000821953	0.00449725
CCG000218	2079.65	-1.07137	0.171847	-6.23444	4.53e-10	6.37e-09
CCG000232	220.951	3.36004	0.276091	12.1701	4.49e-34	2.67e-32
CCG000233	452.186	1.14827	0.292489	3.92585	8.64e-05	0.000586027
CCG000241	7967.96	-1.33177	0.160562	-8.29444	1.09e-16	2.61e-15
CCG000248	790.874	5.24797	0.224146	23.4132	3.14e-121	2.02e-118
CCG000258	73.2378	5.71566	0.715717	7.98592	1.39e-15	3.12e-14
CCG000276	205.993	1.07999	0.257405	4.19571	2.72e-05	0.000202956
CCG000281	1731.36	1.0587	0.1335	7.93032	2.19e-15	4.81e-14
CCG000282	11344	2.3335	0.125592	18.5801	4.66e-77	1.05e-74
CCG000293	276.538	-1.41413	0.230227	-6.14234	8.13e-10	1.12e-08
CCG000313	36.7293	3.13033	0.96047	3.25917	0.0011174	0.00590449
CCG000322	11.873	5.68102	1.70738	3.32733	0.000876832	0.00475407
CCG000334	16883.5	1.7874	0.207888	8.59789	8.12e-18	2.07e-16
CCG000337	1598.59	1.93822	0.166851	11.6165	3.4e-31	1.77e-29
CCG000340	1264.07	-1.12159	0.166529	-6.73508	1.64e-11	2.61e-10
CCG000355	328.194	-1.14605	0.207486	-5.52352	3.32e-08	3.78e-07
CCG000368	1428.65	1.50215	0.151024	9.9464	2.61e-23	9.34e-22
CCG000374	1461.01	-2.1096	0.179427	-11.7574	6.47e-32	3.48e-30
CCG000375	2611.62	-1.47056	0.136887	-10.7429	6.4e-27	2.7e-25
CCG000382	631.256	1.60455	0.168055	9.54779	1.32e-21	4.3e-20
CCG000385	511.019	3.42266	0.250296	13.6745	1.44e-42	1.21e-40
CCG000396	3415.87	-1.40594	0.131125	-10.7222	8.01e-27	3.36e-25
CCG000397	2028.82	-1.54762	0.197357	-7.84173	4.44e-15	9.49e-14
CCG000398	9857.14	-1.23576	0.117361	-10.5295	6.31e-26	2.55e-24
CCG000405	11.3987	7.08265	1.77309	3.99452	6.48e-05	0.000451617
CCG000410	3182.87	-1.01191	0.143787	-7.03756	1.96e-12	3.4e-11
CCG000418	197.924	-1.27685	0.28627	-4.4603	8.18e-06	6.68e-05
CCG000449	865.564	3.51803	0.613715	5.73236	9.9e-09	1.21e-07
CCG000460	2316.26	1.28396	0.14177	9.05661	1.35e-19	3.86e-18
CCG000470	36802.4	1.07131	0.130261	8.22433	1.96e-16	4.6e-15
CCG000487	25063.7	1.12386	0.139312	8.06726	7.19e-16	1.63e-14
CCG000507	31.8406	-2.16115	0.670737	-3.22205	0.00127277	0.00663581
CCG000516	170.477	-1.6814	0.347981	-4.83187	1.35e-06	1.24e-05
CCG000526	9961.8	-1.06653	0.182048	-5.85848	4.67e-09	5.9e-08
CCG000529	4050.78	1.56887	0.117038	13.4049	5.66e-41	4.45e-39
CCG000532	94.3197	4.1412	0.485587	8.52824	1.49e-17	3.73e-16
CCG000533	1045.01	4.29663	0.294766	14.5764	3.97e-48	3.87e-46
CCG000544	1181.74	1.02488	0.16085	6.37166	1.87e-10	2.71e-09
CCG000551	42.3781	-2.06768	0.565173	-3.6585	0.000253697	0.00157963
CCG000577	69.093	2.19007	0.46433	4.71663	2.4e-06	2.13e-05
CCG000594	131.593	6.15611	0.61048	10.0841	6.5e-24	2.38e-22
CCG000608	259.183	-1.59184	0.229236	-6.94411	3.81e-12	6.43e-11
CCG000638	634.913	-4.05826	0.23811	-17.0436	3.9e-65	6.41e-63
CCG000639	373.135	-2.45812	0.216767	-11.3399	8.32e-30	4.1e-28
CCG000653	257.254	1.40627	0.28504	4.93361	8.07e-07	7.65e-06
CCG000662	8163.09	2.76315	0.114983	24.0308	1.32e-127	9.99e-125
CCG000663	129.186	3.25732	0.390398	8.34357	7.21e-17	1.75e-15
CCG000664	1668.96	4.48101	0.59224	7.5662	3.84e-14	7.62e-13
CCG000665	1907.76	1.88118	0.146813	12.8134	1.38e-37	9.48e-36
CCG000671	46.4019	1.75995	0.529699	3.32255	0.000891978	0.00482423
CCG000679	94.2716	2.25363	0.433157	5.2028	1.96e-07	2.03e-06
CCG000721	22827	-1.02409	0.246498	-4.15455	3.26e-05	0.00023966
CCG000728	22959.5	1.84629	0.133076	13.874	9.11e-44	7.87e-42
CCG000732	4201.17	-1.2128	0.204156	-5.94057	2.84e-09	3.7e-08
CCG000746	30108.7	1.43032	0.117053	12.2195	2.45e-34	1.47e-32
CCG000768	45.3831	3.15894	0.575225	5.49167	3.98e-08	4.49e-07
CCG000780	2737.76	-1.5514	0.146343	-10.6011	2.94e-26	1.21e-24
CCG000814	80.6971	2.03231	0.441667	4.60146	4.2e-06	3.58e-05
CCG000828	1041.89	-1.09047	0.175786	-6.20337	5.53e-10	7.69e-09
CCG000837	18733.5	1.20049	0.199929	6.00459	1.92e-09	2.54e-08
CCG000838	609.552	7.40505	2.27807	3.25059	0.00115167	0.00606669
CCG000842	467.116	1.0926	0.190443	5.73713	9.63e-09	1.17e-07
CCG000898	21.8888	8.02767	1.62163	4.95036	7.41e-07	7.08e-06
CCG000919	357.913	1.13252	0.261152	4.33663	1.45e-05	0.000113898
CCG000942	396.983	3.16697	0.283018	11.19	4.56e-29	2.16e-27
CCG000983	8635.55	-1.5942	0.192911	-8.26392	1.41e-16	3.34e-15
CCG001006	575.018	1.6401	0.244456	6.70917	1.96e-11	3.11e-10
CCG001007	5841.59	1.51348	0.21031	7.19642	6.18e-13	1.12e-11
CCG001023	11.6148	5.64859	1.71107	3.3012	0.00096271	0.00516081
CCG001031	43.612	4.15926	0.719618	5.77982	7.48e-09	9.22e-08
CCG001051	113.795	1.19653	0.370685	3.22788	0.00124711	0.00651603
CCG001055	2745.34	-1.01734	0.148033	-6.87239	6.31e-12	1.05e-10
CCG001072	4726.9	1.54492	0.130386	11.8488	2.18e-32	1.21e-30
CCG001080	148.062	-1.72464	0.351292	-4.9094	9.14e-07	8.59e-06
CCG001084	85.3592	1.36207	0.403285	3.37744	0.000731647	0.00406159
CCG001087	251.834	-2.19471	0.416358	-5.27121	1.36e-07	1.44e-06
CCG001118	503.996	1.45483	0.176371	8.24871	1.6e-16	3.78e-15
CCG001120	1106.61	1.06213	0.180571	5.88205	4.05e-09	5.15e-08
CCG001156	1084.07	2.2836	0.161391	14.1495	1.88e-45	1.69e-43
CCG001157	994.943	2.47529	0.153007	16.1776	7.25e-59	1.04e-56
CCG001165	1226.84	-1.84463	0.143807	-12.8272	1.15e-37	7.96e-36
CCG001196	2237.6	1.21843	0.145472	8.37571	5.49e-17	1.34e-15
CCG001197	522.376	-1.22413	0.265707	-4.60705	4.08e-06	3.49e-05
CCG001199	12495.9	2.33661	0.165219	14.1425	2.08e-45	1.85e-43
CCG001232	502.686	-1.04371	0.222694	-4.68674	2.78e-06	2.43e-05
CCG001242	177.969	1.27035	0.285703	4.44642	8.73e-06	7.09e-05
CCG001277	19518.3	-1.07995	0.123806	-8.72287	2.71e-18	7.11e-17
CCG001286	1680.34	3.4935	0.185382	18.8449	3.24e-79	7.78e-77
CCG001304	2236.58	1.10061	0.126879	8.67453	4.15e-18	1.07e-16
CCG001307	1355.44	1.14022	0.174089	6.54967	5.77e-11	8.8e-10
CCG001327	3399.13	-2.08998	0.119001	-17.5627	4.76e-69	8.74e-67
CCG001330	127.442	2.11008	0.352338	5.9888	2.11e-09	2.8e-08
CCG001340	62.9215	6.07058	0.891012	6.81314	9.55e-12	1.56e-10
CCG001345	65.1601	1.52041	0.422592	3.59781	0.000320904	0.00195466
CCG001376	2532.44	5.13819	0.187399	27.4184	1.65e-165	3.62e-162
CCG001389	2348.55	1.01038	0.267253	3.78061	0.000156445	0.00101575
CCG001423	53.357	1.47937	0.469216	3.15284	0.00161689	0.0081935
CCG001426	153.121	1.60469	0.357952	4.48298	7.36e-06	6.06e-05
CCG001433	6776.78	-1.12611	0.147037	-7.65874	1.88e-14	3.81e-13
CCG001440	151.251	4.93395	0.439288	11.2317	2.85e-29	1.36e-27
CCG001458	57.3861	3.02919	0.610784	4.95951	7.07e-07	6.77e-06
CCG001493	4462	1.66752	0.235507	7.08055	1.44e-12	2.52e-11
CCG001503	581.488	-1.00494	0.168412	-5.96712	2.41e-09	3.18e-08
CCG001534	744.229	-1.53425	0.273922	-5.60105	2.13e-08	2.49e-07
CCG001545	419.399	5.25725	0.307061	17.1212	1.03e-65	1.72e-63
CCG001546	61.9081	4.86695	0.634706	7.66804	1.75e-14	3.56e-13
CCG001564	123.122	2.28063	0.445371	5.12073	3.04e-07	3.07e-06
CCG001566	528.925	1.77713	0.182639	9.7303	2.24e-22	7.65e-21
CCG001567	51.7484	1.86245	0.475031	3.9207	8.83e-05	0.000597013
CCG001568	17.2759	7.68239	1.68133	4.56925	4.89e-06	4.14e-05
CCG001570	27809.5	1.61138	0.193736	8.31742	8.99e-17	2.16e-15
CCG001571	10.1708	6.91963	1.78585	3.8747	0.000106755	0.000712818
CCG001604	3965.75	1.02179	0.136099	7.50765	6.02e-14	1.18e-12
CCG001633	10.3659	6.94487	1.82883	3.79743	0.000146202	0.000953779
CCG001636	59.4081	2.79949	0.506624	5.52578	3.28e-08	3.73e-07
CCG001651	108.143	1.1637	0.345203	3.37106	0.000748803	0.00414527
CCG001653	1358.23	-1.71556	0.23511	-7.29684	2.95e-13	5.48e-12
CCG001697	223.513	3.61692	0.405921	8.91038	5.09e-19	1.4e-17
CCG001698	490.224	3.97114	0.216085	18.3777	1.98e-75	4.25e-73
CCG001705	333.266	-1.37842	0.211618	-6.51371	7.33e-11	1.11e-09
CCG001721	145.629	1.75389	0.334673	5.2406	1.6e-07	1.68e-06
CCG001770	2225.76	1.97056	0.132387	14.8849	4.13e-50	4.3e-48
CCG001780	191.472	2.55841	0.54086	4.73027	2.24e-06	1.99e-05
CCG001816	12836	1.08295	0.126668	8.54951	1.24e-17	3.12e-16
CCG001823	4949.53	1.88645	0.135842	13.8871	7.59e-44	6.58e-42
CCG001825	1175.32	1.97332	0.155686	12.6751	8.13e-37	5.44e-35
CCG001838	3501.08	1.19796	0.125197	9.56858	1.08e-21	3.54e-20
CCG001846	406.722	2.49532	0.226511	11.0164	3.19e-28	1.45e-26
CCG001848	5266.95	1.66181	0.140093	11.8622	1.86e-32	1.04e-30
CCG001853	859.159	5.01039	0.229841	21.7994	2.35e-105	1.09e-102
CCG001859	97.3983	-1.44387	0.352155	-4.10009	4.13e-05	0.000298659
CCG001860	209.78	-1.02733	0.265505	-3.86935	0.000109128	0.000727332
CCG001869	5864.09	-1.16513	0.223248	-5.21901	1.8e-07	1.88e-06
CCG001870	378.405	-1.3961	0.431808	-3.23316	0.0012243	0.00640755
CCG001874	19.7004	3.72943	0.946509	3.94019	8.14e-05	0.000555674
CCG001895	179.414	4.17431	0.371519	11.2358	2.72e-29	1.3e-27
CCG001963	234.894	2.20432	0.265477	8.30324	1.01e-16	2.43e-15
CCG001971	187.365	-1.6562	0.335133	-4.94192	7.74e-07	7.36e-06
CCG002002	1067.06	-1.49346	0.190541	-7.83798	4.58e-15	9.76e-14
CCG002011	6346.93	1.40963	0.24043	5.86294	4.55e-09	5.75e-08
CCG002039	631.014	1.25031	0.212245	5.89089	3.84e-09	4.91e-08
CCG002047	90.7187	1.31283	0.411934	3.18699	0.00143764	0.00739313
CCG002048	4444.81	1.65745	0.23547	7.03891	1.94e-12	3.37e-11
CCG002071	270.979	2.03842	0.279819	7.28479	3.22e-13	5.99e-12
CCG002072	30.8356	1.99375	0.617131	3.23067	0.00123502	0.0064575
CCG002083	24.3788	4.35296	0.902154	4.82508	1.4e-06	1.28e-05
CCG002097	73.5804	1.72122	0.436985	3.93885	8.19e-05	0.0005581
CCG002110	1019.15	1.89933	0.204535	9.28606	1.6e-20	4.88e-19
CCG002117	15.8703	5.09475	1.32184	3.85428	0.000116073	0.000771266
CCG002122	3307.73	3.48696	0.169749	20.5419	9.1e-94	3.26e-91
CCG002129	929.239	2.97291	0.180878	16.436	1.06e-60	1.58e-58
CCG002153	31.5066	6.07813	1.17946	5.15331	2.56e-07	2.61e-06
CCG002165	12424.4	1.15062	0.104676	10.9922	4.17e-28	1.88e-26
CCG002171	62.2488	2.85739	0.493791	5.78664	7.18e-09	8.88e-08
CCG002182	2946.55	1.77418	0.16082	11.0321	2.68e-28	1.22e-26
CCG002199	52.8574	1.53332	0.494426	3.10121	0.00192733	0.00956925
CCG002269	3180.86	1.02717	0.183753	5.58994	2.27e-08	2.64e-07
CCG002280	262.59	2.17379	0.23587	9.21604	3.08e-20	9.19e-19
CCG002288	3011.27	-1.04963	0.13816	-7.59725	3.02e-14	6.03e-13
CCG002299	1676.12	-2.38944	0.260016	-9.1896	3.94e-20	1.17e-18
CCG002304	707.02	1.16026	0.185459	6.25612	3.95e-10	5.57e-09
CCG002305	1391.91	1.23882	0.190253	6.51143	7.44e-11	1.12e-09
CCG002318	83.7029	2.87351	0.414217	6.9372	4e-12	6.75e-11
CCG002319	3329.91	2.07323	0.180509	11.4855	1.56e-30	7.93e-29
CCG002339	2087.63	2.82464	0.15264	18.5053	1.87e-76	4.09e-74
CCG002353	1595.87	1.18237	0.134581	8.78559	1.56e-18	4.14e-17
CCG002354	311.069	3.66756	0.268146	13.6775	1.38e-42	1.16e-40
CCG002356	3433.41	1.70343	0.118406	14.3863	6.31e-47	5.87e-45
CCG002374	704.062	1.12912	0.171806	6.5721	4.96e-11	7.65e-10
CCG002376	702.94	-1.6218	0.314299	-5.16006	2.47e-07	2.52e-06
CCG002467	2534.52	-1.32324	0.129587	-10.2112	1.77e-24	6.68e-23
CCG002472	35.9814	3.47083	0.688387	5.04198	4.61e-07	4.54e-06
CCG002474	87.7164	1.52624	0.387013	3.94365	8.03e-05	0.000549096
CCG002482	3008.91	1.25496	0.114251	10.9842	4.55e-28	2.04e-26
CCG002490	60.282	3.20416	0.501433	6.39001	1.66e-10	2.42e-09
CCG002492	3556.69	2.23743	0.143919	15.5464	1.68e-54	2.03e-52
CCG002516	254.19	1.02632	0.238238	4.30796	1.65e-05	0.000128594
CCG002524	1019.61	-1.67185	0.221208	-7.55782	4.1e-14	8.12e-13
CCG002536	4466.37	-1.21349	0.132527	-9.15651	5.36e-20	1.58e-18
CCG002568	8185.36	1.17978	0.111617	10.57	4.11e-26	1.67e-24
CCG002611	110.512	-1.5436	0.365409	-4.22431	2.4e-05	0.000181546
CCG002637	6684.06	1.85551	0.113732	16.3147	7.76e-60	1.12e-57
CCG002646	55.7177	2.69902	0.618972	4.36049	1.3e-05	0.000102825
CCG002677	4811.84	1.20713	0.141922	8.5056	1.81e-17	4.51e-16
CCG002679	55.4545	-2.13195	0.498309	-4.27837	1.88e-05	0.000145685
CCG002730	3391.53	-1.78702	0.131342	-13.6058	3.7e-42	3.07e-40
CCG002731	105.511	-1.68449	0.419315	-4.01724	5.89e-05	0.000413778
CCG002752	2205.88	1.21977	0.208974	5.83696	5.32e-09	6.66e-08
CCG002759	7267.64	2.85962	0.110568	25.8631	1.73e-147	2e-144
CCG002771	20.9432	3.18769	0.84072	3.79162	0.000149667	0.000975224
CCG002783	741.201	3.37998	0.181934	18.578	4.84e-77	1.08e-74
CCG002784	247.393	2.39032	0.251356	9.50972	1.91e-21	6.19e-20
CCG002788	75.066	1.32853	0.391892	3.39004	0.000698821	0.00390216
CCG002794	22.279	8.0508	1.60828	5.00585	5.56e-07	5.41e-06
CCG002797	31.9694	2.69051	0.671679	4.00565	6.18e-05	0.000432508
CCG002804	227.51	-1.68384	0.323202	-5.20986	1.89e-07	1.96e-06
CCG002819	471.672	1.15027	0.227537	5.05533	4.3e-07	4.26e-06
CCG002823	74.7071	3.08385	0.549371	5.61343	1.98e-08	2.32e-07
CCG002834	4989.34	-1.15143	0.190208	-6.05353	1.42e-09	1.9e-08
CCG002850	677.019	2.76919	0.326047	8.49321	2.01e-17	5.01e-16
CCG002851	397.798	1.2965	0.237922	5.44927	5.06e-08	5.64e-07
CCG002853	1089.2	-1.34941	0.199635	-6.75938	1.39e-11	2.22e-10
CCG002872	1722.79	1.3466	0.202895	6.63692	3.2e-11	4.99e-10
CCG002884	1201.44	1.93665	0.24097	8.03692	9.21e-16	2.08e-14
CCG002887	77.611	1.35785	0.407133	3.33515	0.000852519	0.00463954
CCG002890	988.418	1.33899	0.168232	7.95921	1.73e-15	3.84e-14
CCG002892	3079.49	1.47219	0.136655	10.773	4.61e-27	1.97e-25
CCG002894	86.1258	1.71862	0.369709	4.64858	3.34e-06	2.89e-05
CCG002896	56.4782	1.56162	0.460649	3.39005	0.000698801	0.00390216
CCG002897	32.7711	2.3445	0.68603	3.41749	0.000632025	0.00358083
CCG002899	21.7028	2.42634	0.749082	3.23908	0.00119916	0.00629255
CCG002934	508.943	2.36634	0.367826	6.4333	1.25e-10	1.85e-09
CCG002936	7444.4	1.53033	0.151186	10.1222	4.4e-24	1.63e-22
CCG002949	977.967	1.44226	0.164258	8.78049	1.63e-18	4.32e-17
CCG002972	217.416	1.03674	0.246446	4.20678	2.59e-05	0.000194198
CCG002981	339.676	2.28784	0.221121	10.3466	4.34e-25	1.7e-23
CCG002982	463.869	3.36907	0.220692	15.2659	1.29e-52	1.45e-50
CCG002992	1097.56	1.48279	0.19116	7.75678	8.71e-15	1.82e-13
CCG002999	131.405	-1.2118	0.374144	-3.23885	0.00120013	0.00629615
CCG003006	3014.1	-1.54504	0.164767	-9.37711	6.78e-21	2.12e-19
CCG003008	5164.17	1.71808	0.16291	10.5462	5.29e-26	2.15e-24
CCG003017	10300.7	1.39383	0.103205	13.5055	1.45e-41	1.18e-39
CCG003028	260.841	-1.37075	0.277238	-4.9443	7.64e-07	7.28e-06
CCG003036	792.612	1.34205	0.168228	7.97756	1.49e-15	3.33e-14
CCG003044	226.001	-2.20811	0.444762	-4.9647	6.88e-07	6.6e-06
CCG003064	1532.89	1.42908	0.162963	8.76932	1.8e-18	4.76e-17
CCG003069	148.847	-1.5807	0.339001	-4.66282	3.12e-06	2.71e-05
CCG003077	3414.68	2.79114	0.118331	23.5875	5.18e-123	3.65e-120
CCG003080	158.122	2.3563	0.318268	7.40353	1.33e-13	2.54e-12
CCG003101	238.464	-1.00645	0.251392	-4.00351	6.24e-05	0.000435897
CCG003118	780.601	-1.11296	0.153628	-7.24448	4.34e-13	7.95e-12
CCG003142	1112.2	-2.59082	0.160567	-16.1355	1.44e-58	2.03e-56
CCG003149	175.777	3.53775	0.321941	10.9888	4.33e-28	1.95e-26
CCG003158	22.8453	-3.21105	0.86085	-3.73009	0.00019141	0.00122387
CCG003169	7333.19	2.60437	0.179632	14.4984	1.24e-47	1.19e-45
CCG003173	13.3393	4.17969	1.30249	3.20901	0.00133193	0.00690837
CCG003179	2776.02	3.22822	0.162584	19.8557	9.84e-88	3.07e-85
CCG003182	79.4366	2.46928	0.417809	5.91007	3.42e-09	4.4e-08
CCG003197	245.882	3.4865	0.281294	12.3945	2.8e-35	1.74e-33
CCG003198	304.966	1.75634	0.216795	8.10137	5.43e-16	1.24e-14
CCG003203	76.6209	-1.35385	0.389984	-3.47154	0.000517473	0.0029943
CCG003241	368.913	2.84575	0.218226	13.0403	7.21e-39	5.17e-37
CCG003243	704.373	1.32599	0.321241	4.12772	3.66e-05	0.000266895
CCG003254	57.0795	1.97037	0.584315	3.37211	0.000745954	0.00413366
CCG003255	6339.24	1.26118	0.13313	9.47329	2.71e-21	8.68e-20
CCG003258	90.6435	3.68317	0.513978	7.16601	7.72e-13	1.38e-11
CCG003261	293.465	1.07004	0.213891	5.00274	5.65e-07	5.49e-06
CCG003269	182.036	1.33835	0.302883	4.41869	9.93e-06	8.03e-05
CCG003270	1459.74	1.60794	0.186189	8.63608	5.82e-18	1.49e-16
CCG003272	144.79	1.00031	0.290829	3.4395	0.00058278	0.00332467
CCG003288	674.322	-1.31435	0.173954	-7.55577	4.16e-14	8.25e-13
CCG003301	2907.26	1.14735	0.116429	9.85447	6.56e-23	2.3e-21
CCG003345	19.7381	3.08006	0.90755	3.39381	0.000689264	0.00385568
CCG003349	11334	-1.14122	0.108408	-10.5271	6.48e-26	2.61e-24
CCG003357	6738.03	1.35314	0.147699	9.16148	5.12e-20	1.51e-18
CCG003368	293.515	-1.34108	0.329944	-4.06458	4.81e-05	0.000344103
CCG003372	161.259	-1.14009	0.328301	-3.4727	0.00051526	0.00298387
CCG003382	555.654	2.2845	0.242601	9.41668	4.66e-21	1.48e-19
CCG003385	6.94053	6.37204	1.97916	3.21957	0.00128381	0.0066854
CCG003386	8102	1.57504	0.118596	13.2807	3e-40	2.3e-38
CCG003453	474.59	2.36367	0.195059	12.1177	8.51e-34	4.97e-32
CCG003454	1376.58	1.36939	0.243591	5.62166	1.89e-08	2.22e-07
CCG003461	990.172	-3.17668	0.217153	-14.6287	1.84e-48	1.84e-46
CCG003467	132.065	-2.12733	0.545774	-3.89783	9.71e-05	0.000652263
CCG003483	62.5317	-1.76399	0.482731	-3.65418	0.000258003	0.00160324
CCG003547	195.403	1.73248	0.344122	5.03448	4.79e-07	4.71e-06
CCG003552	4104.67	-1.38799	0.270742	-5.12661	2.95e-07	2.98e-06
CCG003555	420.962	-1.37908	0.190449	-7.2412	4.45e-13	8.14e-12
CCG003597	1673.21	1.44243	0.158252	9.11474	7.89e-20	2.3e-18
CCG003602	23.8011	3.24288	0.790307	4.10331	4.07e-05	0.000294724
CCG003616	405.918	-1.71931	0.240369	-7.1528	8.5e-13	1.52e-11
CCG003632	995.827	-1.70961	0.327996	-5.21229	1.87e-07	1.94e-06
CCG003642	832.973	2.22159	0.199669	11.1264	9.33e-29	4.36e-27
CCG003643	3556.38	1.8845	0.119325	15.7931	3.47e-56	4.46e-54
CCG003648	238.24	1.27966	0.248069	5.15849	2.49e-07	2.54e-06
CCG003656	16.5503	4.06625	1.15189	3.53008	0.000415429	0.0024645
CCG003667	10340	1.97052	0.119291	16.5185	2.7e-61	4.1e-59
CCG003668	24.7003	8.19994	1.5912	5.1533	2.56e-07	2.61e-06
CCG003678	6632.37	-1.80206	0.188618	-9.55404	1.25e-21	4.06e-20
CCG003682	464.217	-1.56512	0.185359	-8.44375	3.07e-17	7.56e-16
CCG003684	4631.55	-1.02159	0.240554	-4.24681	2.17e-05	0.000165974
CCG003703	127.893	-1.96776	0.366454	-5.36974	7.89e-08	8.61e-07
CCG003710	5193.71	6.4765	0.766595	8.44839	2.95e-17	7.28e-16
CCG003744	758.167	-1.06043	0.225453	-4.70355	2.56e-06	2.26e-05
CCG003798	4798.4	-1.34979	0.175531	-7.68976	1.47e-14	3.03e-13
CCG003839	72.89	2.80441	0.454641	6.16839	6.9e-10	9.52e-09
CCG003845	1107.82	-1.18448	0.214285	-5.52759	3.25e-08	3.7e-07
CCG003860	2887.74	1.14391	0.12778	8.95216	3.49e-19	9.77e-18
CCG003866	50.916	1.84686	0.518975	3.55868	0.000372729	0.00224037
CCG003867	31.2584	8.53798	1.59773	5.34383	9.1e-08	9.84e-07
CCG003890	3068.14	2.06939	0.128511	16.1028	2.44e-58	3.37e-56
CCG003909	137.224	5.27602	0.508823	10.3691	3.43e-25	1.35e-23
CCG003910	19.4177	6.38929	1.60289	3.98611	6.72e-05	0.000466122
CCG003911	1797.28	-1.32296	0.213279	-6.20298	5.54e-10	7.7e-09
CCG003912	174.774	-1.26907	0.298609	-4.24994	2.14e-05	0.000163902
CCG003929	44856.4	-1.01024	0.102688	-9.83795	7.73e-23	2.7e-21
CCG003934	103.148	1.46561	0.380725	3.84951	0.000118354	0.00078547
CCG003938	1642.31	-1.82091	0.146854	-12.3995	2.63e-35	1.64e-33
CCG003950	79.4036	-1.2205	0.38089	-3.20435	0.00135369	0.00700428
CCG003974	12193.7	2.19427	0.140317	15.6379	4.02e-55	5.02e-53
CCG003975	22.1556	2.34153	0.734981	3.18584	0.00144335	0.00741551
CCG004015	476.563	-1.47323	0.237009	-6.21593	5.1e-10	7.13e-09
CCG004019	203.626	-1.92812	0.480653	-4.01147	6.03e-05	0.000422803
CCG004022	13.4928	4.23447	1.18254	3.58082	0.000342523	0.00207536
CCG004023	118.646	1.31717	0.377075	3.49311	0.000477425	0.00278989
CCG004029	156.298	1.3372	0.285404	4.68527	2.8e-06	2.45e-05
CCG004031	7.00556	6.38446	1.94201	3.28756	0.0010106	0.00538845
CCG004037	584.319	2.56921	0.221376	11.6057	3.86e-31	2.01e-29
CCG004038	2305.73	2.54171	0.212956	11.9354	7.74e-33	4.35e-31
CCG004057	1083.51	1.31732	0.165815	7.94451	1.95e-15	4.31e-14
CCG004058	24081	-1.16561	0.137804	-8.45845	2.71e-17	6.69e-16
CCG004080	21.8561	-3.38359	0.85655	-3.95025	7.81e-05	0.000536189
CCG004093	74.5399	2.93551	0.598982	4.90082	9.54e-07	8.94e-06
CCG004108	21.4925	3.42684	0.853492	4.01509	5.94e-05	0.000416902
CCG004115	31.0323	2.39119	0.661959	3.61229	0.000303505	0.00185791
CCG004116	195.109	2.06012	0.26852	7.67212	1.69e-14	3.45e-13
CCG004123	1339.24	-1.74784	0.180676	-9.67387	3.89e-22	1.31e-20
CCG004124	2303.75	2.27394	0.266777	8.52375	1.54e-17	3.88e-16
CCG004125	758.916	1.57141	0.34396	4.56859	4.91e-06	4.16e-05
CCG004126	78.6716	2.06623	0.421603	4.90088	9.54e-07	8.94e-06
CCG004129	458.892	1.21415	0.182711	6.64517	3.03e-11	4.73e-10
CCG004139	87.2702	7.56697	1.08958	6.94485	3.79e-12	6.4e-11
CCG004147	1011.54	1.85441	0.198491	9.3425	9.41e-21	2.91e-19
CCG004150	1177.47	1.15545	0.151342	7.63472	2.26e-14	4.56e-13
CCG004177	47072.1	2.95422	0.112517	26.2558	6.14e-152	8.96e-149
CCG004208	544.248	2.64231	0.196637	13.4375	3.64e-41	2.89e-39
CCG004220	1607.67	1.11849	0.174795	6.39887	1.57e-10	2.3e-09
CCG004224	44.341	2.76758	0.553063	5.00409	5.61e-07	5.45e-06
CCG004227	270.105	-1.42537	0.243265	-5.85936	4.65e-09	5.87e-08
CCG004240	277.205	-1.95557	0.251617	-7.77202	7.72e-15	1.62e-13
CCG004245	49.2789	4.07629	0.637422	6.39496	1.61e-10	2.36e-09
CCG004247	173.644	1.52769	0.322955	4.73034	2.24e-06	1.99e-05
CCG004250	39.3986	1.69576	0.546859	3.10092	0.00192923	0.00957433
CCG004256	2052.45	3.01321	0.184294	16.35	4.35e-60	6.34e-58
CCG004265	2417.25	-1.27325	0.254384	-5.00525	5.58e-07	5.43e-06
CCG004300	225.924	2.90162	0.325273	8.92057	4.64e-19	1.29e-17
CCG004301	14.6348	4.37492	1.22528	3.57055	0.000356235	0.0021501
CCG004331	25.0593	4.10274	0.870236	4.71451	2.42e-06	2.15e-05
CCG004346	136.938	2.54176	0.588758	4.31715	1.58e-05	0.000123801
CCG004364	8158.11	-1.12452	0.188655	-5.96071	2.51e-09	3.3e-08
CCG004385	68.6526	1.72132	0.515162	3.34132	0.000833799	0.00455237
CCG004417	9.94942	-6.62618	1.79744	-3.68645	0.000227407	0.00143349
CCG004448	120.645	-1.28547	0.336335	-3.82198	0.000132384	0.000870127
CCG004460	67.9323	1.52734	0.452594	3.37463	0.00073915	0.00410011
CCG004464	977.03	1.11422	0.154766	7.1994	6.05e-13	1.1e-11
CCG004494	2836.65	1.12765	0.175656	6.41965	1.37e-10	2.02e-09
CCG004526	43.0245	1.81596	0.554246	3.27645	0.00105123	0.00559418
CCG004534	4108.35	1.34454	0.117264	11.4659	1.96e-30	9.88e-29
CCG004535	222.742	2.2125	0.260551	8.49164	2.04e-17	5.07e-16
CCG004545	2589.94	1.53856	0.13259	11.6039	3.94e-31	2.05e-29
CCG004553	1501.61	1.28944	0.143405	8.99163	2.44e-19	6.89e-18
CCG004561	412.081	-1.38567	0.257488	-5.38148	7.39e-08	8.1e-07
CCG004571	125.616	-1.11613	0.325226	-3.43186	0.000599463	0.00341006
CCG004574	74.305	-1.66498	0.484511	-3.43642	0.000589454	0.00336187
CCG004581	392.456	-1.02673	0.226233	-4.53839	5.67e-06	4.75e-05
CCG004583	237.432	-1.3203	0.262685	-5.02617	5e-07	4.91e-06
CCG004590	6150.34	2.19189	0.142305	15.4028	1.57e-53	1.82e-51
CCG004594	33.6772	2.31172	0.63956	3.61455	0.000300864	0.00184442
CCG004600	145.157	1.69662	0.329179	5.15409	2.55e-07	2.6e-06
CCG004636	1059.26	-1.25061	0.162151	-7.71265	1.23e-14	2.55e-13
CCG004639	13947.8	1.48663	0.104506	14.2252	6.39e-46	5.84e-44
CCG004653	15.8527	2.95045	0.922067	3.19982	0.00137516	0.00709853
CCG004655	6119.33	1.02053	0.11409	8.94501	3.72e-19	1.04e-17
CCG004667	16.8217	3.74165	1.1421	3.27611	0.00105247	0.00559808
CCG004668	17.9449	5.24458	1.28302	4.0877	4.36e-05	0.000313405
CCG004703	336.448	3.20591	0.25736	12.4569	1.28e-35	8.1e-34
CCG004704	420.232	-1.14865	0.188896	-6.08085	1.2e-09	1.62e-08
CCG004712	10377	3.5945	0.179692	20.0036	5.12e-89	1.67e-86
CCG004713	297.459	-1.63526	0.218179	-7.49505	6.63e-14	1.3e-12
CCG004716	2898.74	-1.24368	0.131896	-9.42929	4.13e-21	1.31e-19
CCG004723	5128.27	2.43571	0.196662	12.3852	3.14e-35	1.95e-33
CCG004743	2502.77	-1.49696	0.135586	-11.0407	2.43e-28	1.11e-26
CCG004755	6104.3	2.86984	0.165836	17.3052	4.29e-67	7.39e-65
CCG004756	1264.06	1.89114	0.1556	12.1538	5.47e-34	3.23e-32
CCG004774	36.3139	-2.32147	0.602441	-3.85344	0.000116471	0.000773441
CCG004791	215.41	1.18691	0.270851	4.38213	1.18e-05	9.36e-05
CCG004797	1879.66	-1.0337	0.129619	-7.97497	1.52e-15	3.39e-14
CCG004825	8637.7	1.34763	0.188868	7.1353	9.66e-13	1.72e-11
CCG004828	9231.77	4.4636	0.119995	37.1982	7.31e-303	1.6e-298
CCG004835	16.7935	2.67686	0.864848	3.09518	0.00196695	0.00974384
CCG004840	4915.58	1.40011	0.17203	8.13872	3.99e-16	9.15e-15
CCG004843	155.573	-1.57259	0.310312	-5.06778	4.02e-07	4e-06
CCG004882	42.2094	4.47971	0.723415	6.19245	5.92e-10	8.22e-09
CCG004910	162.769	-1.54296	0.339648	-4.54282	5.55e-06	4.66e-05
CCG004929	521.94	-1.91928	0.256097	-7.49434	6.66e-14	1.3e-12
CCG004930	5815.93	1.35459	0.122579	11.0508	2.17e-28	9.98e-27
CCG004937	5243.94	3.4083	0.200472	17.0014	8.02e-65	1.3e-62
CCG004938	371.492	1.50929	0.263486	5.72815	1.02e-08	1.24e-07
CCG004947	167.503	3.12353	0.362896	8.60723	7.48e-18	1.91e-16
CCG004993	14895.8	1.109	0.112002	9.90166	4.09e-23	1.44e-21
CCG004999	4584.63	-1.43817	0.216801	-6.63356	3.28e-11	5.1e-10
CCG005001	2339.9	1.34202	0.138236	9.70813	2.78e-22	9.47e-21
CCG005012	840.34	1.21528	0.150671	8.06577	7.28e-16	1.65e-14
CCG005014	3713.62	2.32959	0.123264	18.8992	1.16e-79	2.81e-77
CCG005016	1081.36	1.91669	0.156046	12.2829	1.12e-34	6.85e-33
CCG005018	618.433	3.39093	0.187953	18.0413	9.23e-73	1.85e-70
CCG005036	147.581	1.01346	0.294183	3.44498	0.000571095	0.00326312
CCG005046	264.59	3.84961	0.417383	9.22321	2.88e-20	8.64e-19
CCG005058	31.2391	5.05119	1.07212	4.71142	2.46e-06	2.18e-05
CCG005067	201.17	1.12749	0.25984	4.33918	1.43e-05	0.000112663
CCG005073	272.422	2.45623	0.252284	9.73598	2.12e-22	7.24e-21
CCG005090	142.784	1.506	0.293915	5.12394	2.99e-07	3.02e-06
CCG005092	5973.84	1.66539	0.141408	11.7772	5.11e-32	2.79e-30
CCG005117	432.993	1.27197	0.237021	5.3665	8.03e-08	8.75e-07
CCG005152	489.617	-1.86444	0.264071	-7.06037	1.66e-12	2.9e-11
CCG005163	415.767	1.22299	0.196375	6.22784	4.73e-10	6.64e-09
CCG005177	42.9821	-2.49556	0.595918	-4.18775	2.82e-05	0.000209274
CCG005182	1022.23	1.74429	0.174844	9.97624	1.94e-23	6.97e-22
CCG005209	159.679	-1.58644	0.35224	-4.50386	6.67e-06	5.53e-05
CCG005222	823.506	2.37537	0.243533	9.7538	1.78e-22	6.12e-21
CCG005227	9930	-2.47729	0.137882	-17.9668	3.55e-72	6.98e-70
CCG005230	25175.7	-1.07328	0.17279	-6.21145	5.25e-10	7.32e-09
CCG005270	234.932	-1.01834	0.279174	-3.6477	0.000264596	0.00164121
CCG005320	305.739	1.00167	0.285158	3.51268	0.00044362	0.00261754
CCG005376	276.873	-1.87447	0.231403	-8.10045	5.48e-16	1.24e-14
CCG005392	88.7348	4.20994	0.4769	8.8277	1.07e-18	2.87e-17
CCG005395	23.0556	8.0991	1.6223	4.99236	5.96e-07	5.77e-06
CCG005403	180.273	2.57369	0.522401	4.92666	8.36e-07	7.91e-06
CCG005404	615.391	1.76553	0.209674	8.42034	3.75e-17	9.19e-16
CCG005405	549.934	2.45773	0.181776	13.5207	1.18e-41	9.6e-40
CCG005419	984.064	1.62762	0.162912	9.99076	1.67e-23	6.04e-22
CCG005468	4733.88	1.46864	0.159708	9.19579	3.72e-20	1.11e-18
CCG005480	2269.16	-2.11471	0.246651	-8.57368	1e-17	2.54e-16
CCG005487	25.6944	5.77746	1.21034	4.77341	1.81e-06	1.63e-05
CCG005502	36.6609	4.07601	0.731845	5.56949	2.55e-08	2.95e-07
CCG005521	232.694	2.65886	0.336028	7.91263	2.52e-15	5.51e-14
CCG005523	345.674	1.37884	0.216399	6.37177	1.87e-10	2.71e-09
CCG005529	2215.98	1.41828	0.210477	6.73841	1.6e-11	2.56e-10
CCG005536	80.042	1.97258	0.395022	4.9936	5.93e-07	5.74e-06
CCG005548	320.236	1.10853	0.227738	4.86758	1.13e-06	1.05e-05
CCG005549	1826.13	3.87331	0.222159	17.4349	4.49e-68	7.97e-66
CCG005560	269.45	-1.14749	0.231951	-4.94712	7.53e-07	7.19e-06
CCG005573	1899.67	-1.22494	0.125945	-9.72601	2.34e-22	7.97e-21
CCG005595	14824.9	3.13219	0.226285	13.8418	1.43e-43	1.22e-41
CCG005599	87.5622	1.34821	0.367256	3.67104	0.000241563	0.0015114
CCG005605	39.542	1.86504	0.581469	3.20746	0.00133914	0.00694072
CCG005611	2355.34	5.18687	0.20675	25.0877	6.77e-139	6.73e-136
CCG005612	221.015	2.2923	0.255385	8.97586	2.81e-19	7.92e-18
CCG005625	514.632	-1.03835	0.21296	-4.87579	1.08e-06	1.01e-05
CCG005637	135.827	-2.82151	0.361257	-7.81025	5.71e-15	1.21e-13
CCG005646	357.17	1.04779	0.219013	4.78413	1.72e-06	1.55e-05
CCG005650	6065.05	1.78405	0.122134	14.6073	2.52e-48	2.5e-46
CCG005659	384.906	3.58453	0.747526	4.79519	1.63e-06	1.47e-05
CCG005661	5826.72	1.52054	0.148747	10.2223	1.57e-24	5.99e-23
CCG005672	1126.76	-1.03713	0.141379	-7.33579	2.2e-13	4.15e-12
CCG005688	2992.89	2.17969	0.196809	11.0752	1.66e-28	7.67e-27
CCG005691	522.8	-1.32466	0.23035	-5.75066	8.89e-09	1.09e-07
CCG005692	924.564	-1.10183	0.250409	-4.40011	1.08e-05	8.68e-05
CCG005697	3313.35	1.25743	0.235008	5.3506	8.77e-08	9.5e-07
CCG005725	878.971	3.62239	0.173546	20.8728	9.46e-97	3.9e-94
CCG005740	444.055	3.01363	0.218711	13.779	3.41e-43	2.9e-41
CCG005758	1358.92	-1.64766	0.162965	-10.1105	4.96e-24	1.84e-22
CCG005761	400.761	1.49019	0.192844	7.72744	1.1e-14	2.28e-13
CCG005764	660.387	1.62449	0.204033	7.96193	1.69e-15	3.76e-14
CCG005771	15.7239	3.63545	1.16866	3.11078	0.00186594	0.00931945
CCG005772	8.26399	6.62392	1.9156	3.45788	0.000544453	0.0031256
CCG005776	1072.09	3.25241	0.684696	4.75015	2.03e-06	1.81e-05
CCG005778	31.1595	3.01049	0.682749	4.40937	1.04e-05	8.34e-05
CCG005780	423.258	3.11293	0.936457	3.32416	0.00088686	0.0048013
CCG005787	827.035	-1.63063	0.336623	-4.84409	1.27e-06	1.17e-05
CCG005799	12.454	4.69479	1.46291	3.20921	0.00133099	0.00690809
CCG005836	2018.38	2.14083	0.135954	15.7468	7.23e-56	9.13e-54
CCG005841	305.081	1.38536	0.259088	5.34705	8.94e-08	9.68e-07
CCG005843	195.084	1.81088	0.274776	6.59039	4.39e-11	6.79e-10
CCG005848	30150.2	1.03932	0.150584	6.90194	5.13e-12	8.59e-11
CCG005849	574.081	-1.02618	0.304673	-3.36815	0.000756756	0.00418503
CCG005865	4574.03	-1.18817	0.11831	-10.0428	9.88e-24	3.59e-22
CCG005866	4299.89	3.00198	0.14393	20.8573	1.31e-96	5.2e-94
CCG005869	1148.68	-1.16789	0.206921	-5.64414	1.66e-08	1.97e-07
CCG005870	142.807	-1.01049	0.296578	-3.40718	0.000656379	0.00369441
CCG005888	1310.89	1.88417	0.167805	11.2283	2.96e-29	1.41e-27
CCG005904	7482.78	1.04819	0.145511	7.20347	5.87e-13	1.07e-11
CCG005911	6256.59	3.59374	0.154751	23.2228	2.68e-119	1.67e-116
CCG005923	236.904	2.12316	0.315237	6.73511	1.64e-11	2.61e-10
CCG005928	16.415	6.1429	1.63194	3.76417	0.000167102	0.00108013
CCG005948	35.8471	-2.79054	0.829718	-3.36324	0.000770336	0.00424938
CCG005960	469.882	2.07917	0.189276	10.9849	4.52e-28	2.03e-26
CCG005973	406.976	1.17011	0.203692	5.74454	9.22e-09	1.13e-07
CCG006025	11.2016	3.94861	1.25079	3.1569	0.00159456	0.00809159
CCG006034	482.264	1.17234	0.192596	6.08703	1.15e-09	1.56e-08
CCG006035	472.655	1.31206	0.213525	6.14476	8.01e-10	1.1e-08
CCG006039	42.1656	4.68307	0.77065	6.07677	1.23e-09	1.66e-08
CCG006060	34.1092	2.04009	0.625666	3.26067	0.00111147	0.00587758
CCG006070	262.853	2.34323	0.30781	7.61259	2.69e-14	5.39e-13
CCG006081	2599.08	2.6793	0.155752	17.2024	2.55e-66	4.35e-64
CCG006091	84.4435	1.70161	0.450014	3.78123	0.000156052	0.00101394
CCG006097	2349.11	1.8852	0.177043	10.6483	1.78e-26	7.34e-25
CCG006106	165.092	1.32943	0.285742	4.65256	3.28e-06	2.84e-05
CCG006107	1908.66	1.0237	0.145993	7.01195	2.35e-12	4.06e-11
CCG006108	539.627	-1.88331	0.220045	-8.55875	1.14e-17	2.88e-16
CCG006126	2773.69	1.39295	0.171865	8.10491	5.28e-16	1.2e-14
CCG006166	455.16	5.94907	0.911031	6.53004	6.58e-11	9.99e-10
CCG006167	74.6063	4.97341	0.62232	7.99173	1.33e-15	2.98e-14
CCG006175	17.7454	2.92023	0.908308	3.21502	0.00130435	0.00678106
CCG006178	86.8342	2.7649	0.40508	6.82557	8.76e-12	1.44e-10
CCG006206	4945.56	-2.46843	0.239455	-10.3085	6.45e-25	2.5e-23
CCG006210	947.485	1.73447	0.177059	9.79602	1.17e-22	4.07e-21
CCG006244	17.151	4.56379	1.17909	3.87059	0.000108574	0.000724302
CCG006260	1739.37	-1.27524	0.153926	-8.28474	1.18e-16	2.82e-15
CCG006268	82.8255	6.48871	0.808842	8.02221	1.04e-15	2.34e-14
CCG006273	177.428	2.05169	0.27345	7.50297	6.24e-14	1.22e-12
CCG006274	6298.18	-1.65704	0.162074	-10.224	1.55e-24	5.9e-23
CCG006279	13.5654	4.84475	1.31926	3.67233	0.000240349	0.00150466
CCG006319	1715.41	-1.33829	0.14167	-9.44651	3.5e-21	1.12e-19
CCG006325	27.7543	3.2049	0.732899	4.37291	1.23e-05	9.74e-05
CCG006340	22.1197	3.91234	0.892887	4.38167	1.18e-05	9.38e-05
CCG006343	387.235	-2.55869	0.269897	-9.48024	2.54e-21	8.16e-20
CCG006346	66.3982	1.66864	0.425378	3.92271	8.76e-05	0.000592779
CCG006347	12623.2	1.33745	0.152047	8.79631	1.41e-18	3.77e-17
CCG006360	2409.87	2.66798	0.137885	19.3493	2.07e-83	5.51e-81
CCG006392	82.4272	-1.41167	0.395746	-3.5671	0.000360949	0.00217435
CCG006396	262.631	1.11079	0.262929	4.22466	2.39e-05	0.000181366
CCG006401	2363.41	-1.19274	0.169045	-7.05572	1.72e-12	2.99e-11
CCG006411	3742.12	1.4182	0.129406	10.9593	6e-28	2.67e-26
CCG006416	54.8399	1.49254	0.44999	3.31683	0.000910464	0.00491569
CCG006419	20.9779	4.42177	1.20072	3.6826	0.000230865	0.00145236
CCG006457	257.929	1.7728	0.249405	7.10813	1.18e-12	2.07e-11
CCG006458	403.723	1.98091	0.222431	8.9057	5.31e-19	1.46e-17
CCG006460	1795.16	1.30907	0.154717	8.46106	2.65e-17	6.55e-16
CCG006461	42.4385	3.4656	0.859447	4.03236	5.52e-05	0.000390292
CCG006485	9527.5	2.20864	0.153484	14.39	5.98e-47	5.58e-45
CCG006490	331.426	2.32275	0.269837	8.60798	7.44e-18	1.9e-16
CCG006505	402.056	1.91147	0.238368	8.01898	1.07e-15	2.4e-14
CCG006520	1925.58	1.15344	0.169539	6.80342	1.02e-11	1.66e-10
CCG006522	1126.16	1.02126	0.148797	6.86348	6.72e-12	1.11e-10
CCG006556	277.98	-1.38922	0.249652	-5.56462	2.63e-08	3.03e-07
CCG006557	21.9233	8.02808	1.60813	4.9922	5.97e-07	5.77e-06
CCG006564	2026.33	-1.29724	0.246852	-5.25514	1.48e-07	1.56e-06
CCG006565	324.908	-1.18559	0.302848	-3.91482	9.05e-05	0.00061061
CCG006589	402.301	1.41871	0.287416	4.93609	7.97e-07	7.57e-06
CCG006595	1116.54	-1.48612	0.170393	-8.72174	2.74e-18	7.17e-17
CCG006596	1531.12	-1.4196	0.20582	-6.89728	5.3e-12	8.86e-11
CCG006605	2841.75	-1.35432	0.149865	-9.03695	1.61e-19	4.6e-18
CCG006612	1655.29	1.54569	0.144797	10.6749	1.33e-26	5.54e-25
CCG006636	20.7318	-2.90579	0.896444	-3.24146	0.0011892	0.00624779
CCG006638	630.145	-2.26655	0.221949	-10.212	1.75e-24	6.64e-23
CCG006643	177.071	1.63316	0.292215	5.5889	2.29e-08	2.65e-07
CCG006645	3331.31	4.22081	0.179591	23.5023	3.86e-122	2.56e-119
CCG006648	509.486	-1.02731	0.317826	-3.23232	0.00122789	0.00642331
CCG006666	16288.9	1.95575	0.15284	12.796	1.73e-37	1.18e-35
CCG006696	68.5832	-1.72995	0.427261	-4.04895	5.14e-05	0.000366122
CCG006705	95.4899	-1.43004	0.38084	-3.75496	0.000173369	0.00111728
CCG006713	2161.25	2.43038	0.144582	16.8098	2.07e-63	3.26e-61
CCG006738	513.986	-1.03115	0.180523	-5.712	1.12e-08	1.35e-07
CCG006753	1751.41	1.17527	0.128524	9.14434	6e-20	1.77e-18
CCG006764	703.777	-1.53572	0.184489	-8.3242	8.49e-17	2.04e-15
CCG006769	513.682	1.18507	0.223974	5.29109	1.22e-07	1.3e-06
CCG006795	2701.66	1.09804	0.174639	6.28748	3.23e-10	4.58e-09
CCG006833	53.2632	5.00454	0.751056	6.66333	2.68e-11	4.21e-10
CCG006842	244.551	1.03834	0.270537	3.83806	0.000124009	0.000819519
CCG006845	8398.7	1.31612	0.109532	12.0159	2.93e-33	1.67e-31
CCG006846	37.3012	2.05462	0.605943	3.39078	0.000696937	0.00389362
CCG006868	221.321	2.66584	0.302849	8.80255	1.34e-18	3.58e-17
CCG006911	211.387	2.84209	0.285606	9.95109	2.49e-23	8.94e-22
CCG006916	130.384	2.89788	0.37646	7.6977	1.39e-14	2.86e-13
CCG006923	15975.7	2.96414	0.104389	28.3951	2.32e-177	1.02e-173
CCG006939	689.791	-1.32213	0.21021	-6.28956	3.18e-10	4.53e-09
CCG006950	2880.71	1.50868	0.160818	9.38128	6.52e-21	2.05e-19
CCG006957	93.1432	1.17354	0.356517	3.29169	0.000995859	0.00532155
CCG006974	94.7002	1.2695	0.355817	3.56785	0.000359928	0.00216879
CCG006983	752.918	-3.89761	0.648341	-6.01167	1.84e-09	2.44e-08
CCG006984	223.934	-2.81434	0.494705	-5.68892	1.28e-08	1.53e-07
CCG006985	182.108	-3.05288	0.441762	-6.91069	4.82e-12	8.1e-11
CCG006997	676.862	2.45439	0.323002	7.59869	2.99e-14	5.98e-13
CCG007010	1340.67	2.55218	0.210474	12.1259	7.7e-34	4.53e-32
CCG007013	8420.71	-1.33115	0.138235	-9.62958	6e-22	2.01e-20
CCG007014	198.718	-1.38199	0.32498	-4.25253	2.11e-05	0.000162303
CCG007017	168.608	1.95664	0.416729	4.69524	2.66e-06	2.34e-05
CCG007020	54.4264	1.58606	0.472815	3.3545	0.000795087	0.00437048
CCG007022	94.7154	4.10006	0.461613	8.88203	6.56e-19	1.8e-17
CCG007044	528.76	2.81149	0.197875	14.2084	8.12e-46	7.4e-44
CCG007046	7377.99	1.39985	0.127158	11.0087	3.47e-28	1.58e-26
CCG007057	110.647	5.02121	1.36918	3.66732	0.000245106	0.00153181
CCG007058	73.9674	-1.384	0.418365	-3.30811	0.000939271	0.00504258
CCG007110	1279.28	2.1049	0.195064	10.7909	3.8e-27	1.62e-25
CCG007148	180.205	-1.09854	0.26345	-4.16981	3.05e-05	0.000225225
CCG007157	34.7924	5.63429	0.998824	5.64092	1.69e-08	2e-07
CCG007183	93.0405	2.09545	0.404942	5.17468	2.28e-07	2.34e-06
CCG007185	159.52	2.24686	0.320095	7.01936	2.23e-12	3.85e-11
CCG007186	9553.42	2.07419	0.152494	13.6017	3.91e-42	3.24e-40
CCG007196	182.221	-1.65818	0.392402	-4.22572	2.38e-05	0.000180664
CCG007228	142.193	3.59451	0.379422	9.47364	2.7e-21	8.66e-20
CCG007241	14.9502	7.47445	1.6937	4.41309	1.02e-05	8.21e-05
CCG007242	192.558	1.93507	0.291848	6.6304	3.35e-11	5.21e-10
CCG007250	1545.13	1.01382	0.132105	7.67435	1.66e-14	3.4e-13
CCG007260	403.473	4.57902	0.263804	17.3577	1.73e-67	3.02e-65
CCG007262	112.805	2.47435	0.37541	6.59107	4.37e-11	6.77e-10
CCG007287	337.625	1.22903	0.219167	5.60774	2.05e-08	2.4e-07
CCG007293	114.633	1.42703	0.337203	4.23197	2.32e-05	0.000176144
CCG007297	5532.76	1.11798	0.1229	9.09669	9.31e-20	2.7e-18
CCG007300	10939.4	1.2181	0.131602	9.25598	2.12e-20	6.41e-19
CCG007301	61.0188	7.04612	1.11096	6.34239	2.26e-10	3.26e-09
CCG007308	2763.88	1.31478	0.14203	9.25705	2.1e-20	6.35e-19
CCG007319	55.8604	1.62864	0.474851	3.42979	0.000604038	0.00343519
CCG007320	27.4161	3.64466	0.816792	4.46217	8.11e-06	6.63e-05
CCG007392	589.518	-1.35386	0.363992	-3.71947	0.000199642	0.00127204
CCG007400	66.674	-1.59324	0.432469	-3.68405	0.000229556	0.0014462
CCG007401	414.196	-1.95075	0.234258	-8.32736	8.27e-17	1.99e-15
CCG007402	125.641	-2.77501	0.39805	-6.97151	3.14e-12	5.33e-11
CCG007412	2936.65	3.0849	0.253791	12.1553	5.38e-34	3.19e-32
CCG007421	7.55446	6.49312	1.90714	3.40463	0.000662526	0.00372709
CCG007486	7157.93	3.08925	0.222776	13.867	1e-43	8.64e-42
CCG007489	169.936	4.28539	0.405374	10.5714	4.04e-26	1.65e-24
CCG007492	691.137	1.30169	0.198347	6.5627	5.28e-11	8.13e-10
CCG007500	22.7336	3.32378	0.864744	3.84366	0.000121213	0.000802492
CCG007501	3471.3	1.53725	0.136564	11.2566	2.15e-29	1.04e-27
CCG007508	2508.69	-1.18648	0.246136	-4.82042	1.43e-06	1.3e-05
CCG007509	73.5383	-2.02943	0.417356	-4.86259	1.16e-06	1.07e-05
CCG007510	644.19	1.38311	0.286223	4.83229	1.35e-06	1.24e-05
CCG007527	6765.81	-1.09827	0.106184	-10.3431	4.5e-25	1.76e-23
CCG007529	275.833	-1.12017	0.223195	-5.01879	5.2e-07	5.09e-06
CCG007536	124.64	-1.84537	0.413829	-4.45926	8.22e-06	6.71e-05
CCG007550	6871.17	1.54287	0.110916	13.9103	5.48e-44	4.77e-42
CCG007560	25911.7	-1.14132	0.155196	-7.35407	1.92e-13	3.63e-12
CCG007578	2790.26	1.31757	0.171811	7.66871	1.74e-14	3.54e-13
CCG007590	1202.39	3.68331	0.242896	15.1641	6.11e-52	6.71e-50
CCG007605	6017.11	3.00187	0.177485	16.9134	3.58e-64	5.76e-62
CCG007607	120.971	1.64524	0.518228	3.17474	0.00149972	0.0076691
CCG007609	15.1607	5.02725	1.35408	3.71266	0.000205089	0.00130333
CCG007610	1427.34	-1.08327	0.169585	-6.38778	1.68e-10	2.45e-09
CCG007613	552.424	2.59825	0.231182	11.239	2.62e-29	1.26e-27
CCG007614	250.001	2.22409	0.241316	9.21652	3.07e-20	9.17e-19
CCG007641	134.323	-1.09296	0.303648	-3.59943	0.000318916	0.00194472
CCG007650	564.077	-1.78867	0.369697	-4.83822	1.31e-06	1.2e-05
CCG007651	2477.75	-1.12541	0.226828	-4.96151	6.99e-07	6.7e-06
CCG007694	1578.52	1.58836	0.156888	10.1242	4.32e-24	1.6e-22
CCG007698	1083.27	-2.57586	0.274611	-9.38003	6.6e-21	2.07e-19
CCG007702	788.977	-1.3211	0.224238	-5.8915	3.83e-09	4.9e-08
CCG007723	181.472	-1.27956	0.263983	-4.84715	1.25e-06	1.15e-05
CCG007730	1309.78	1.04426	0.165191	6.32156	2.59e-10	3.71e-09
CCG007753	5262.52	2.10021	0.130257	16.1236	1.74e-58	2.44e-56
CCG007762	28.2004	-3.79271	0.815165	-4.65269	3.28e-06	2.84e-05
CCG007763	4614	-2.54108	0.170227	-14.9276	2.18e-50	2.3e-48
CCG007787	348.833	-1.32982	0.270687	-4.91274	8.98e-07	8.45e-06
CCG007790	1940.34	-1.29161	0.172691	-7.47934	7.47e-14	1.45e-12
CCG007795	1539.38	1.11491	0.139837	7.97294	1.55e-15	3.45e-14
CCG007797	85.3119	-1.61276	0.438986	-3.67382	0.000238948	0.00149717
CCG007830	110.618	-1.25344	0.352606	-3.5548	0.000378274	0.00227058
CCG007841	1727.51	1.96895	0.157372	12.5114	6.46e-36	4.11e-34
CCG007854	79.821	2.2077	0.441147	5.00446	5.6e-07	5.45e-06
CCG007857	5333.1	2.06375	0.588218	3.50848	0.000450677	0.00265345
CCG007880	120.057	1.82787	0.324246	5.6373	1.73e-08	2.04e-07
CCG007885	723.435	-1.32039	0.196572	-6.71708	1.85e-11	2.95e-10
CCG007893	901.862	1.95133	0.178756	10.9162	9.65e-28	4.23e-26
CCG007895	1319.73	1.10684	0.174607	6.33908	2.31e-10	3.32e-09
CCG007896	1818.32	1.02736	0.126245	8.13785	4.02e-16	9.21e-15
CCG007909	44240.7	2.46357	0.204116	12.0695	1.53e-33	8.88e-32
CCG007930	16.5642	3.02034	0.945669	3.19387	0.0014038	0.00723617
CCG007935	69.8227	1.62657	0.411891	3.94904	7.85e-05	0.000538405
CCG007951	279.95	1.22219	0.253952	4.81266	1.49e-06	1.35e-05
CCG007955	30.3501	5.03176	0.969048	5.19247	2.08e-07	2.14e-06
CCG007956	7567.98	1.30659	0.111695	11.6978	1.31e-31	6.98e-30
CCG007961	16275.6	-1.10498	0.177831	-6.21369	5.18e-10	7.22e-09
CCG007992	22.8717	6.62943	1.57906	4.19835	2.69e-05	0.00020074
CCG007994	213.852	1.84411	0.259196	7.11472	1.12e-12	1.98e-11
CCG007996	3284.79	1.14992	0.188008	6.11633	9.58e-10	1.31e-08
CCG008006	384.107	1.12608	0.195089	5.7721	7.83e-09	9.63e-08
CCG008008	597.013	3.93144	0.198161	19.8396	1.35e-87	4.11e-85
CCG008009	3837.87	2.61272	0.134585	19.4131	5.98e-84	1.65e-81
CCG008018	3869.39	1.40447	0.113893	12.3315	6.13e-35	3.77e-33
CCG008048	251.62	2.85372	0.256704	11.1168	1.04e-28	4.85e-27
CCG008056	5902.08	2.49598	0.126709	19.6986	2.22e-86	6.46e-84
CCG008060	96.9606	1.47176	0.370562	3.97169	7.14e-05	0.000492762
CCG008091	1932.19	1.6557	0.129722	12.7635	2.62e-37	1.78e-35
CCG008100	76.5351	2.5373	0.488987	5.18889	2.12e-07	2.18e-06
CCG008131	138.806	1.73783	0.307398	5.65335	1.57e-08	1.87e-07
CCG008142	2165.68	1.2484	0.130224	9.58652	9.11e-22	3.02e-20
CCG008153	578.439	-1.79078	0.212111	-8.44264	3.1e-17	7.62e-16
CCG008154	12046.3	1.06732	0.207535	5.14285	2.71e-07	2.75e-06
CCG008160	920.959	2.31403	0.16134	14.3426	1.19e-46	1.1e-44
CCG008186	59.9303	3.29325	0.579155	5.68631	1.3e-08	1.56e-07
CCG008196	303.202	1.18069	0.246353	4.79268	1.65e-06	1.48e-05
CCG008209	2139.15	1.05441	0.18442	5.71744	1.08e-08	1.31e-07
CCG008227	140.709	3.27054	0.339568	9.63149	5.89e-22	1.98e-20
CCG008228	60.358	2.72198	0.476925	5.70736	1.15e-08	1.38e-07
CCG008229	644.749	1.73541	0.17753	9.77532	1.44e-22	4.98e-21
CCG008245	496.601	2.02744	0.196828	10.3006	7e-25	2.71e-23
CCG008254	3217.51	1.26255	0.164454	7.67722	1.63e-14	3.33e-13
CCG008266	1207.31	1.10307	0.150456	7.33153	2.28e-13	4.28e-12
CCG008272	2090.29	1.20921	0.13245	9.12955	6.88e-20	2.01e-18
CCG008285	10.9779	7.03002	1.76123	3.99154	6.56e-05	0.000456482
CCG008286	13.3669	3.80639	1.2249	3.10752	0.00188665	0.00939501
CCG008292	1978.63	-1.00863	0.150843	-6.68666	2.28e-11	3.61e-10
CCG008297	26.8482	5.86502	1.20986	4.8477	1.25e-06	1.15e-05
CCG008305	287.664	1.48778	0.272285	5.46404	4.65e-08	5.21e-07
CCG008311	6813.18	1.43297	0.119327	12.0088	3.2e-33	1.82e-31
CCG008317	73.7875	1.70653	0.415363	4.10852	3.98e-05	0.000288532
CCG008321	239.308	3.87569	0.402583	9.62704	6.15e-22	2.05e-20
CCG008322	83.6766	2.28227	0.623179	3.6623	0.000249961	0.00156036
CCG008325	70.9623	1.28135	0.409838	3.12647	0.00176916	0.00888573
CCG008345	1430.57	1.12043	0.196847	5.69187	1.26e-08	1.51e-07
CCG008371	3426.38	3.38334	0.194006	17.4393	4.15e-68	7.43e-66
CCG008372	1011.13	2.08134	0.183569	11.3382	8.49e-30	4.17e-28
CCG008376	109.036	-1.42742	0.360929	-3.95485	7.66e-05	0.000526801
CCG008380	878.497	-1.0273	0.148431	-6.92104	4.48e-12	7.54e-11
CCG008381	250.858	-1.05836	0.228642	-4.62887	3.68e-06	3.16e-05
CCG008386	173.87	2.14154	0.389278	5.50132	3.77e-08	4.26e-07
CCG008393	2143.64	-1.07815	0.182592	-5.90471	3.53e-09	4.54e-08
CCG008396	8.23343	6.61498	1.85807	3.56014	0.000370661	0.00222978
CCG008411	554.181	-1.01739	0.196297	-5.18292	2.18e-07	2.25e-06
CCG008414	5896.8	1.74586	0.256512	6.80616	1e-11	1.64e-10
CCG008430	474.984	1.5846	0.205727	7.70242	1.34e-14	2.76e-13
CCG008431	2386.6	2.84933	0.279293	10.202	1.94e-24	7.32e-23
CCG008432	13581.8	1.13475	0.16102	7.04725	1.82e-12	3.18e-11
CCG008438	373.633	2.22949	0.229284	9.72371	2.39e-22	8.14e-21
CCG008458	1221.04	-1.9816	0.180991	-10.9486	6.75e-28	2.99e-26
CCG008465	256.026	-1.63462	0.242305	-6.74611	1.52e-11	2.43e-10
CCG008479	2887.69	-1.23784	0.223858	-5.52958	3.21e-08	3.66e-07
CCG008497	1852.6	1.55202	0.137537	11.2844	1.57e-29	7.6e-28
CCG008523	2297.35	-1.67193	0.132702	-12.5992	2.13e-36	1.4e-34
CCG008532	1452.4	1.03451	0.135448	7.63772	2.21e-14	4.46e-13
CCG008538	105.28	1.34093	0.426669	3.14278	0.00167349	0.00845094
CCG008551	461.305	-1.146	0.197566	-5.80062	6.61e-09	8.2e-08
CCG008560	96.3987	4.77045	0.519088	9.19006	3.93e-20	1.17e-18
CCG008566	1503.49	-1.0859	0.223529	-4.85799	1.19e-06	1.1e-05
CCG008567	13534	1.56581	0.107672	14.5425	6.52e-48	6.3e-46
CCG008584	35.0228	3.82088	0.761882	5.01506	5.3e-07	5.18e-06
CCG008589	5988.27	1.38166	0.151749	9.10489	8.64e-20	2.51e-18
CCG008592	62.1749	3.50872	0.503138	6.97368	3.09e-12	5.27e-11
CCG008594	68.5947	2.54884	0.446683	5.70615	1.16e-08	1.39e-07
CCG008599	51.1762	2.09422	0.530599	3.94691	7.92e-05	0.000542357
CCG008606	31.8068	2.68331	0.693992	3.86648	0.000110418	0.000735256
CCG008608	23.4509	3.38635	0.805414	4.20448	2.62e-05	0.00019579
CCG008623	5437.3	-1.46191	0.191179	-7.64683	2.06e-14	4.17e-13
CCG008636	1736.07	2.35486	0.131859	17.859	2.46e-71	4.76e-69
CCG008653	1482.26	2.24061	0.196273	11.4158	3.49e-30	1.73e-28
CCG008662	215.025	-1.09795	0.243911	-4.50143	6.75e-06	5.59e-05
CCG008680	1277.29	-1.1783	0.181895	-6.47793	9.3e-11	1.4e-09
CCG008686	3600.2	4.52851	0.217352	20.835	2.09e-96	8.15e-94
CCG008687	4163.23	2.75731	0.134666	20.4751	3.59e-93	1.27e-90
CCG008694	111.046	1.22667	0.362846	3.38069	0.000723033	0.00402023
CCG008699	110.529	-1.6854	0.423184	-3.98266	6.81e-05	0.000472202
CCG008700	101.042	-2.14699	0.46694	-4.59801	4.27e-06	3.63e-05
CCG008708	431.2	2.25647	0.217942	10.3535	4.03e-25	1.59e-23
CCG008724	542.903	-1.67924	0.186969	-8.98142	2.67e-19	7.54e-18
CCG008732	789.989	-1.22848	0.208853	-5.88202	4.05e-09	5.15e-08
CCG008749	1542.17	1.62359	0.173662	9.34912	8.84e-21	2.74e-19
CCG008754	103.145	3.53045	0.527184	6.6968	2.13e-11	3.37e-10
CCG008800	246.096	-1.42396	0.291262	-4.88893	1.01e-06	9.47e-06
CCG008808	17816.2	-2.11971	0.677469	-3.12886	0.00175484	0.00882303
CCG008814	5339.5	-1.71895	0.176292	-9.75059	1.83e-22	6.3e-21
CCG008835	680.526	1.74458	0.160649	10.8596	1.8e-27	7.8e-26
CCG008836	2863.31	1.27468	0.124058	10.2749	9.15e-25	3.52e-23
CCG008841	7.0706	6.39659	1.92142	3.32909	0.000871292	0.00472873
CCG008854	1969.6	1.97386	0.145563	13.5601	6.9e-42	5.65e-40
CCG008859	1740.02	1.72033	0.150552	11.4268	3.07e-30	1.53e-28
CCG008860	34.6645	3.10828	0.689014	4.5112	6.45e-06	5.36e-05
CCG008863	1281.9	2.82627	0.169866	16.6383	3.68e-62	5.63e-60
CCG008866	1323.03	2.04292	0.194625	10.4967	8.94e-26	3.57e-24
CCG008889	692.165	-2.13556	0.306081	-6.97709	3.01e-12	5.15e-11
CCG008897	32.9462	3.74167	0.713022	5.24761	1.54e-07	1.62e-06
CCG008940	13.1848	3.74558	1.14225	3.27911	0.00104135	0.00554295
CCG008970	120.06	1.30977	0.362192	3.61624	0.000298915	0.00183504
CCG008974	94.6661	1.68598	0.463696	3.63596	0.000276953	0.00171127
CCG008984	1463.92	-1.52255	0.301876	-5.04362	4.57e-07	4.5e-06
CCG008987	5833.58	-1.29719	0.137962	-9.40252	5.33e-21	1.68e-19
CCG008997	6913.09	2.84265	0.132754	21.413	1.01e-101	4.34e-99
CCG008998	262.817	1.88404	0.268626	7.01362	2.32e-12	4.01e-11
CCG009000	36.1308	2.97287	0.628537	4.72983	2.25e-06	2e-05
CCG009019	593.788	-1.0915	0.187942	-5.80763	6.34e-09	7.89e-08
CCG009020	247.35	1.00144	0.24741	4.04768	5.17e-05	0.000367669
CCG009031	152.39	-2.84551	0.503475	-5.65174	1.59e-08	1.88e-07
CCG009036	1707.78	1.73346	0.16492	10.5109	7.7e-26	3.08e-24
CCG009055	1458.12	2.47682	0.163373	15.1606	6.45e-52	7.05e-50
CCG009064	3159.04	1.3557	0.153262	8.84564	9.1e-19	2.46e-17
CCG009065	2475.11	1.43342	0.13275	10.7979	3.52e-27	1.51e-25
CCG009110	1046.24	-1.15728	0.173979	-6.65187	2.89e-11	4.53e-10
CCG009115	1588.85	4.85133	0.248019	19.5603	3.37e-85	9.56e-83
CCG009116	393.546	2.48576	0.273626	9.08455	1.04e-19	3e-18
CCG009127	579.112	1.95715	0.202278	9.67556	3.83e-22	1.3e-20
CCG009135	558.053	1.38736	0.194415	7.13606	9.6e-13	1.71e-11
CCG009144	207.166	-1.08725	0.316649	-3.43362	0.000595586	0.00339065
CCG009145	662.642	-1.17529	0.223651	-5.25501	1.48e-07	1.56e-06
CCG009147	2905.95	-1.70294	0.125651	-13.5529	7.61e-42	6.21e-40
CCG009212	577.429	3.30384	0.212655	15.5361	1.98e-54	2.37e-52
CCG009213	58.2565	3.41392	0.526107	6.48902	8.64e-11	1.3e-09
CCG009214	52.1021	3.83355	0.598626	6.40391	1.51e-10	2.23e-09
CCG009215	7523.62	3.11628	0.163825	19.022	1.12e-80	2.78e-78
CCG009217	13079.7	3.06721	0.156531	19.5949	1.71e-85	4.92e-83
CCG009227	1546.26	-1.13142	0.184556	-6.1305	8.76e-10	1.2e-08
CCG009229	172.377	-1.09847	0.331268	-3.31594	0.000913344	0.00492638
CCG009234	227.447	6.09657	1.01398	6.01253	1.83e-09	2.43e-08
CCG009245	2762.81	1.19181	0.155276	7.6754	1.65e-14	3.37e-13
CCG009246	1981.15	4.12702	0.199265	20.7112	2.74e-95	1.03e-92
CCG009248	34.1516	6.19806	1.1725	5.28619	1.25e-07	1.33e-06
CCG009256	2771.8	-1.01541	0.124828	-8.13442	4.14e-16	9.46e-15
CCG009258	88.5904	3.20655	0.447981	7.15778	8.2e-13	1.47e-11
CCG009262	1825.8	-2.34252	0.131689	-17.7883	8.71e-71	1.67e-68
CCG009281	12529	1.84017	0.122528	15.0184	5.56e-51	5.96e-49
CCG009293	4004.08	1.69093	0.140476	12.0372	2.27e-33	1.3e-31
CCG009295	2210.23	2.57854	0.15262	16.8951	4.89e-64	7.8e-62
CCG009299	19.7927	7.88016	1.62707	4.84317	1.28e-06	1.18e-05
CCG009302	38.5835	5.38402	0.919975	5.85235	4.85e-09	6.1e-08
CCG009303	10.6222	6.98356	1.77164	3.94187	8.08e-05	0.000552677
CCG009304	11.238	7.06122	1.81773	3.88464	0.000102481	0.000686376
CCG009314	3640.94	1.03016	0.136447	7.5499	4.36e-14	8.61e-13
CCG009317	936.665	1.27875	0.275577	4.64027	3.48e-06	3e-05
CCG009336	2551.88	3.64331	0.141758	25.7009	1.14e-145	1.25e-142
CCG009361	4470.26	1.70284	0.110436	15.4193	1.21e-53	1.42e-51
CCG009363	159.414	-1.13957	0.331124	-3.44152	0.000578449	0.00330169
CCG009369	2801.5	4.51133	0.25653	17.586	3.15e-69	5.84e-67
CCG009378	247.332	3.51814	0.268846	13.0861	3.95e-39	2.88e-37
CCG009386	1631.96	-1.33519	0.146233	-9.13058	6.81e-20	2e-18
CCG009408	2365.36	1.09804	0.138908	7.90476	2.68e-15	5.85e-14
CCG009410	3791.61	2.56724	0.140083	18.3266	5.08e-75	1.07e-72
CCG009414	126.694	2.10563	0.46414	4.53662	5.72e-06	4.79e-05
CCG009436	484.061	1.49953	0.205473	7.29792	2.92e-13	5.45e-12
CCG009439	188.568	1.23394	0.274647	4.49282	7.03e-06	5.8e-05
CCG009446	1519.52	2.55048	0.155716	16.379	2.7e-60	3.96e-58
CCG009447	174.702	1.53796	0.276372	5.5648	2.62e-08	3.03e-07
CCG009471	146.885	2.5342	0.308276	8.22054	2.03e-16	4.75e-15
CCG009503	56.272	-2.98998	0.516178	-5.79253	6.93e-09	8.59e-08
CCG009521	70.7114	-3.7387	0.597772	-6.25439	3.99e-10	5.63e-09
CCG009554	451.453	-1.78154	0.210335	-8.47002	2.45e-17	6.08e-16
CCG009557	221.569	-1.19554	0.294269	-4.06276	4.85e-05	0.00034658
CCG009568	67.1318	2.91292	0.547908	5.31644	1.06e-07	1.14e-06
CCG009569	27.7292	4.0289	0.808238	4.98479	6.2e-07	5.98e-06
CCG009588	721.23	1.94812	0.188615	10.3285	5.23e-25	2.04e-23
CCG009614	3676.06	2.47203	0.135279	18.2736	1.34e-74	2.79e-72
CCG009619	261.45	1.04693	0.276335	3.78863	0.00015148	0.00098586
CCG009622	130.506	1.26897	0.300095	4.22855	2.35e-05	0.00017872
CCG009625	2771.83	1.08262	0.122764	8.81872	1.16e-18	3.11e-17
CCG009628	133.049	1.36361	0.339676	4.01444	5.96e-05	0.000417904
CCG009644	103.172	1.06461	0.339563	3.13525	0.0017171	0.00864523
CCG009661	3919.26	1.31955	0.148081	8.91096	5.06e-19	1.4e-17
CCG009664	78.7064	2.60104	0.540406	4.81313	1.49e-06	1.35e-05
CCG009671	227.702	-1.08858	0.278697	-3.90597	9.38e-05	0.00063107
CCG009676	3239.38	-1.67201	0.126827	-13.1834	1.09e-39	8.22e-38
CCG009677	119.303	-1.55269	0.319376	-4.86165	1.16e-06	1.08e-05
CCG009678	1066.55	-1.56205	0.25337	-6.16508	7.04e-10	9.7e-09
CCG009729	11713.8	1.69539	0.137232	12.3542	4.62e-35	2.85e-33
CCG009737	128.749	-2.68679	0.505808	-5.31187	1.09e-07	1.17e-06
CCG009738	2239.14	-3.84936	0.817724	-4.70741	2.51e-06	2.22e-05
CCG009739	225.57	-2.3239	0.445124	-5.22081	1.78e-07	1.86e-06
CCG009749	4935.87	1.17587	0.130464	9.01299	2.01e-19	5.7e-18
CCG009769	568.338	1.89941	0.22684	8.37336	5.6e-17	1.36e-15
CCG009772	5166.94	2.23162	0.145716	15.3148	6.09e-53	6.93e-51
CCG009774	4833.86	1.26625	0.115333	10.979	4.82e-28	2.16e-26
CCG009783	4931.01	3.5774	0.126919	28.1865	8.57e-175	2.67e-171
CCG009794	111.517	-1.13864	0.333983	-3.40929	0.000651328	0.00367166
CCG009798	1597.81	-1.01355	0.160955	-6.29711	3.03e-10	4.32e-09
CCG009813	483.509	4.61163	0.256168	18.0024	1.87e-72	3.71e-70
CCG009814	595.249	5.30909	1.25871	4.21789	2.47e-05	0.000185833
CCG009819	3161.78	1.45639	0.202341	7.19772	6.12e-13	1.11e-11
CCG009863	114.325	-1.05304	0.341073	-3.08742	0.00201899	0.00997
CCG009892	152.644	1.89776	0.2931	6.47477	9.5e-11	1.42e-09
CCG009897	396.155	1.08485	0.232141	4.67325	2.96e-06	2.59e-05
CCG009918	13296	-1.26759	0.125066	-10.1354	3.85e-24	1.43e-22
CCG009935	250.594	-1.16059	0.27444	-4.22894	2.35e-05	0.000178469
CCG009972	268.545	1.42648	0.242824	5.87456	4.24e-09	5.37e-08
CCG009992	4393.87	1.93439	0.215615	8.97151	2.92e-19	8.23e-18
CCG010004	96.151	1.5768	0.358962	4.39265	1.12e-05	8.95e-05
CCG010007	47.0931	3.39379	0.628457	5.40019	6.66e-08	7.32e-07
CCG010009	138.545	4.51252	0.579379	7.78855	6.78e-15	1.43e-13
CCG010010	691.751	1.23386	0.187629	6.57609	4.83e-11	7.46e-10
CCG010011	138.508	3.93909	0.402284	9.79183	1.22e-22	4.24e-21
CCG010012	1605.38	2.66943	0.165738	16.1063	2.3e-58	3.21e-56
CCG010014	1517.6	4.30971	0.188776	22.8297	2.32e-115	1.41e-112
CCG010016	4617.85	1.56223	0.118412	13.1932	9.6e-40	7.24e-38
CCG010018	289.72	3.74981	0.259466	14.452	2.43e-47	2.3e-45
CCG010019	76.6554	4.14802	0.511646	8.1072	5.18e-16	1.18e-14
CCG010029	52.015	1.5487	0.487623	3.17603	0.00149308	0.00764586
CCG010030	594.363	1.46418	0.268627	5.45063	5.02e-08	5.6e-07
CCG010036	163.741	-1.53358	0.303654	-5.05042	4.41e-07	4.35e-06
CCG010044	5407.15	1.24565	0.115224	10.8107	3.06e-27	1.32e-25
CCG010075	328.209	1.83599	0.325914	5.63335	1.77e-08	2.08e-07
CCG010076	175.056	2.92602	0.550533	5.31489	1.07e-07	1.15e-06
CCG010082	1102.51	1.71462	0.143261	11.9685	5.2e-33	2.94e-31
CCG010098	224.91	1.09093	0.302353	3.60814	0.000308401	0.0018848
CCG010123	85.6719	2.12913	0.378989	5.61793	1.93e-08	2.27e-07
CCG010134	3899.13	1.41781	0.123025	11.5245	9.93e-31	5.09e-29
CCG010139	30607.6	1.85261	0.118158	15.6791	2.1e-55	2.64e-53
CCG010161	2298.65	-1.14056	0.247261	-4.61277	3.97e-06	3.4e-05
CCG010189	59.6734	4.36946	0.601102	7.26908	3.62e-13	6.71e-12
CCG010203	257.053	2.10307	0.306071	6.87119	6.37e-12	1.06e-10
CCG010210	298.271	-1.27407	0.258556	-4.92762	8.32e-07	7.87e-06
CCG010213	39.2817	3.08899	0.617081	5.0058	5.56e-07	5.41e-06
CCG010214	81.9352	2.70758	0.504019	5.37198	7.79e-08	8.51e-07
CCG010215	142.708	4.35296	0.423062	10.2892	7.88e-25	3.05e-23
CCG010222	4551.94	1.39392	0.111868	12.4604	1.23e-35	7.78e-34
CCG010237	115.91	-1.10862	0.359166	-3.08666	0.00202417	0.00998877
CCG010249	2304.22	1.60348	0.14671	10.9295	8.33e-28	3.66e-26
CCG010251	233.597	-1.30207	0.339828	-3.83156	0.000127333	0.00083996
CCG010269	64.6921	1.97326	0.484064	4.07645	4.57e-05	0.000328191
CCG010270	345.124	1.88827	0.433567	4.35518	1.33e-05	0.000105119
CCG010275	156.748	-2.90747	0.378013	-7.69145	1.45e-14	2.99e-13
CCG010277	16313.6	3.17207	0.139037	22.8146	3.28e-115	1.94e-112
CCG010287	31.7604	2.49744	0.634603	3.93544	8.3e-05	0.000565375
CCG010290	1186.47	1.21499	0.138557	8.76887	1.8e-18	4.77e-17
CCG010307	4579.48	1.69423	0.117046	14.4749	1.75e-47	1.67e-45
CCG010344	10542.9	-1.94035	0.504425	-3.84666	0.00011974	0.000793947
CCG010369	1746.38	-1.18415	0.269493	-4.39399	1.11e-05	8.91e-05
CCG010395	1106.92	2.88636	0.169361	17.0427	3.96e-65	6.46e-63
CCG010408	746.488	1.36408	0.22967	5.93928	2.86e-09	3.73e-08
CCG010450	3172.19	1.33681	0.157729	8.47541	2.34e-17	5.81e-16
CCG010459	130.051	2.58439	0.356128	7.25692	3.96e-13	7.3e-12
CCG010466	7433.21	1.4039	0.115326	12.1734	4.31e-34	2.57e-32
CCG010478	379.092	-1.12656	0.27888	-4.0396	5.35e-05	0.000378928
CCG010481	237.857	3.35014	0.277867	12.0566	1.79e-33	1.03e-31
CCG010499	50.274	4.54982	0.668603	6.80496	1.01e-11	1.65e-10
CCG010507	4538.12	3.40693	0.249051	13.6796	1.34e-42	1.13e-40
CCG010536	282.964	1.27701	0.223536	5.71276	1.11e-08	1.34e-07
CCG010560	366.942	-1.17292	0.21299	-5.50691	3.65e-08	4.14e-07
CCG010577	917.984	1.43718	0.201699	7.12536	1.04e-12	1.83e-11
CCG010599	118.109	-1.70456	0.364011	-4.68273	2.83e-06	2.48e-05
CCG010609	433.808	4.14936	0.275643	15.0534	3.28e-51	3.55e-49
CCG010612	1193.12	-1.94141	0.589825	-3.2915	0.000996549	0.00532394
CCG010634	5094.5	-1.106	0.124946	-8.85185	8.61e-19	2.33e-17
CCG010651	2363.49	-1.04533	0.188537	-5.5444	2.95e-08	3.38e-07
CCG010666	123.911	2.5491	0.345594	7.37598	1.63e-13	3.1e-12
CCG010669	122.159	1.62991	0.371532	4.38699	1.15e-05	9.16e-05
CCG010686	3144.47	1.79051	0.147681	12.1242	7.86e-34	4.61e-32
CCG010690	1353.15	3.1104	0.151175	20.5749	4.61e-94	1.68e-91
CCG010691	1368.63	3.29525	0.164261	20.0611	1.61e-89	5.35e-87
CCG010697	5686.78	1.63679	0.111125	14.7293	4.18e-49	4.27e-47
CCG010700	95.8946	-1.63048	0.443139	-3.67938	0.000233802	0.00146851
CCG010705	192.217	1.36038	0.269293	5.05166	4.38e-07	4.33e-06
CCG010746	1364.84	3.34878	0.157054	21.3224	7.03e-101	2.96e-98
CCG010765	135.394	1.68512	0.333795	5.04836	4.46e-07	4.39e-06
CCG010772	2431.66	2.20389	0.120202	18.3349	4.36e-75	9.24e-73
CCG010775	4274.41	2.11535	0.131621	16.0715	4.04e-58	5.52e-56
CCG010777	1367.44	-1.27896	0.224974	-5.68491	1.31e-08	1.57e-07
CCG010779	995.356	-1.2009	0.238649	-5.03207	4.85e-07	4.77e-06
CCG010787	1243.41	-1.13349	0.236826	-4.78616	1.7e-06	1.53e-05
CCG010792	181.901	3.41702	0.316401	10.7997	3.45e-27	1.48e-25
CCG010802	375.863	1.52706	0.209203	7.2994	2.89e-13	5.4e-12
CCG010826	7.74957	6.52648	1.89264	3.44835	0.000564025	0.0032261
CCG010827	70.0609	4.00679	0.551859	7.26054	3.86e-13	7.11e-12
CCG010833	204.5	1.1193	0.339696	3.29499	0.00098424	0.0052659
CCG010834	83.2279	2.14004	0.414638	5.16123	2.45e-07	2.51e-06
CCG010836	101.063	4.07371	0.464037	8.77883	1.65e-18	4.38e-17
CCG010843	188.28	-1.1915	0.314995	-3.7826	0.000155196	0.00100915
CCG010846	1504.7	1.35038	0.140273	9.62674	6.17e-22	2.06e-20
CCG010873	966.863	-1.73005	0.207302	-8.34556	7.09e-17	1.72e-15
CCG010883	37.7738	3.23367	0.626211	5.16387	2.42e-07	2.48e-06
CCG010897	2510.87	1.42427	0.143343	9.93608	2.9e-23	1.03e-21
CCG010910	523.488	-1.1202	0.177347	-6.31641	2.68e-10	3.83e-09
CCG010914	245.606	-1.79651	0.294953	-6.09083	1.12e-09	1.52e-08
CCG010927	1056.7	1.55269	0.141726	10.9556	6.25e-28	2.78e-26
CCG010934	64.4597	-1.56686	0.465488	-3.36607	0.000762486	0.00421246
CCG010937	5474.71	1.42299	0.129669	10.974	5.09e-28	2.28e-26
CCG010942	140.334	-1.12093	0.340601	-3.29103	0.000998229	0.00532901
CCG010952	1121.84	1.59055	0.274921	5.7855	7.23e-09	8.93e-08
CCG010993	6783.31	4.7135	0.476993	9.88169	5e-23	1.75e-21
CCG010994	84.6479	3.71654	0.499159	7.44562	9.65e-14	1.86e-12
CCG011090	426.624	-1.8147	0.194061	-9.35121	8.67e-21	2.69e-19
CCG011094	16547.2	1.2111	0.103626	11.6872	1.48e-31	7.86e-30
CCG011110	3255.62	2.77138	0.175842	15.7607	5.8e-56	7.37e-54
CCG011111	12158.7	1.95715	0.1406	13.92	4.79e-44	4.19e-42
CCG011113	885.01	-1.98135	0.16732	-11.8417	2.38e-32	1.32e-30
CCG011141	116.553	1.07981	0.31642	3.4126	0.000643472	0.00363393
CCG011142	2607.47	1.49193	0.14468	10.3119	6.22e-25	2.42e-23
CCG011146	20622.2	1.44816	0.111326	13.0083	1.1e-38	7.79e-37
CCG011147	992.58	5.7854	0.675761	8.5613	1.12e-17	2.82e-16
CCG011181	6444.31	1.83124	0.160412	11.4158	3.49e-30	1.73e-28
CCG011195	398.981	1.08063	0.190748	5.66523	1.47e-08	1.75e-07
CCG011229	430.964	-1.09326	0.205393	-5.32279	1.02e-07	1.1e-06
CCG011231	1105.92	-1.31456	0.150259	-8.74861	2.16e-18	5.69e-17
CCG011234	102.122	2.69759	0.374865	7.19615	6.19e-13	1.12e-11
CCG011237	373.87	6.33285	0.397638	15.9262	4.17e-57	5.56e-55
CCG011258	574.037	1.38093	0.168349	8.20277	2.35e-16	5.47e-15
CCG011278	356.223	1.60733	0.231063	6.95623	3.49e-12	5.92e-11
CCG011279	101.062	2.24264	0.369286	6.07291	1.26e-09	1.7e-08
CCG011280	18.039	6.29296	1.63014	3.86037	0.000113216	0.000753198
CCG011281	13710.2	2.14975	0.196364	10.9478	6.81e-28	3.01e-26
CCG011290	1365.25	1.97052	0.230168	8.56122	1.12e-17	2.82e-16
CCG011312	165.623	2.28414	0.336245	6.79309	1.1e-11	1.78e-10
CCG011313	1287.76	1.20817	0.16412	7.36151	1.82e-13	3.44e-12
CCG011321	304.736	-2.77358	0.396644	-6.99263	2.7e-12	4.62e-11
CCG011344	130.666	2.29428	0.335853	6.8312	8.42e-12	1.38e-10
CCG011352	1288.55	1.3463	0.155433	8.66158	4.65e-18	1.2e-16
CCG011353	1760.95	1.84297	0.207345	8.88842	6.2e-19	1.7e-17
CCG011367	3230.08	-1.71545	0.129626	-13.2339	5.59e-40	4.23e-38
CCG011387	144.787	1.33103	0.340463	3.90946	9.25e-05	0.000622778
CCG011408	122.53	-1.74545	0.374046	-4.6664	3.07e-06	2.67e-05
CCG011420	10748.7	1.64751	0.104075	15.83	1.93e-56	2.53e-54
CCG011421	764.343	2.64428	0.165894	15.9396	3.36e-57	4.51e-55
CCG011453	1019.96	1.05174	0.1587	6.62719	3.42e-11	5.32e-10
CCG011455	92.6543	2.73017	0.392175	6.96161	3.36e-12	5.71e-11
CCG011461	956.387	2.89603	0.164376	17.6184	1.78e-69	3.33e-67
CCG011480	309.598	-1.18443	0.275698	-4.29612	1.74e-05	0.00013522
CCG011489	153.28	1.65898	0.313011	5.30007	1.16e-07	1.24e-06
CCG011506	26.2777	-2.80306	0.808939	-3.4651	0.000530027	0.00305643
CCG011525	446.748	1.11116	0.210681	5.27413	1.33e-07	1.42e-06
CCG011527	137.549	2.85521	0.386681	7.38387	1.54e-13	2.93e-12
CCG011536	378.802	2.75756	0.21015	13.1219	2.47e-39	1.8e-37
CCG011539	26.0822	2.72937	0.698709	3.90631	9.37e-05	0.00063039
CCG011577	288.815	1.21658	0.347575	3.50018	0.000464936	0.00272869
CCG011578	98.2174	-1.2118	0.345733	-3.505	0.000456603	0.00268617
CCG011593	5507.42	1.18669	0.120568	9.8425	7.38e-23	2.58e-21
CCG011597	17254.8	1.70509	0.155959	10.9329	8.02e-28	3.53e-26
CCG011603	1323.08	-1.11573	0.223703	-4.98755	6.11e-07	5.9e-06
CCG011726	659.608	-1.02664	0.160593	-6.39282	1.63e-10	2.38e-09
CCG011733	137.625	3.15997	0.34765	9.08953	9.95e-20	2.87e-18
CCG011743	807.16	1.57063	0.239731	6.55165	5.69e-11	8.69e-10
CCG011765	17300.2	-1.22331	0.233486	-5.23935	1.61e-07	1.69e-06
CCG011773	2095.83	1.04256	0.14129	7.3789	1.6e-13	3.04e-12
CCG011780	5595.09	1.07348	0.132299	8.11401	4.9e-16	1.12e-14
CCG011785	186.694	2.05778	0.277968	7.40293	1.33e-13	2.55e-12
CCG011791	1015.2	1.1188	0.230474	4.85436	1.21e-06	1.12e-05
CCG011793	48.9121	2.60427	0.549914	4.73578	2.18e-06	1.94e-05
CCG011804	420.3	1.33303	0.186498	7.14765	8.83e-13	1.57e-11
CCG011817	1326.04	1.1528	0.173541	6.64279	3.08e-11	4.8e-10
CCG011820	44.7275	1.664	0.500798	3.32269	0.000891555	0.00482313
CCG011836	30.6024	3.24085	0.767226	4.22411	2.4e-05	0.000181646
CCG011848	41.6075	1.81627	0.552975	3.28454	0.00102149	0.00544122
CCG011851	1334.34	1.26832	0.160667	7.89413	2.92e-15	6.35e-14
CCG011881	34.6484	3.67605	0.687718	5.34529	9.03e-08	9.76e-07
CCG011891	38.3422	2.50495	0.58974	4.24754	2.16e-05	0.000165492
CCG011893	1858.4	4.0685	0.143716	28.3092	2.66e-176	9.7e-173
CCG011906	6488.74	1.00449	0.10877	9.23502	2.58e-20	7.75e-19
CCG011910	312.196	3.6889	0.271961	13.5641	6.54e-42	5.38e-40
CCG011911	139.456	2.44288	0.313725	7.78668	6.88e-15	1.45e-13
CCG011914	514.993	1.54792	0.202573	7.64128	2.15e-14	4.35e-13
CCG011917	119.742	1.28104	0.369847	3.46372	0.00053277	0.00306739
CCG011929	1524.08	-1.26666	0.139173	-9.10131	8.93e-20	2.59e-18
CCG011941	767.525	-1.41313	0.193623	-7.2984	2.91e-13	5.43e-12
CCG011947	114.187	1.45077	0.321018	4.51929	6.2e-06	5.17e-05
CCG011971	718.877	1.47507	0.204923	7.19816	6.1e-13	1.11e-11
CCG011973	1276.62	1.77028	0.147434	12.0073	3.25e-33	1.85e-31
CCG011980	2738.2	-1.12153	0.137113	-8.17961	2.85e-16	6.59e-15
CCG011999	7889.31	1.55977	0.147942	10.5431	5.47e-26	2.21e-24
CCG012031	1585.72	1.08233	0.137392	7.87766	3.34e-15	7.2e-14
CCG012037	236.8	1.15051	0.245778	4.6811	2.85e-06	2.5e-05
CCG012052	1381.79	1.77	0.19614	9.0242	1.81e-19	5.15e-18
CCG012058	570.788	1.37864	0.211237	6.52649	6.73e-11	1.02e-09
CCG012062	138.054	-1.84028	0.305073	-6.03226	1.62e-09	2.16e-08
CCG012070	272.193	-1.7337	0.333596	-5.197	2.03e-07	2.09e-06
CCG012090	399.33	-1.035	0.264474	-3.9134	9.1e-05	0.000613647
CCG012103	5288.54	-1.0353	0.263804	-3.9245	8.69e-05	0.000589132
CCG012123	2011.41	2.11333	0.161034	13.1236	2.41e-39	1.78e-37
CCG012124	7623.13	2.27477	0.149481	15.2178	2.7e-52	2.99e-50
CCG012125	2094.23	2.13244	0.159516	13.3682	9.28e-41	7.19e-39
CCG012126	67.3247	1.63429	0.416591	3.92301	8.75e-05	0.000592245
CCG012128	20.1365	3.32345	0.87421	3.80166	0.000143727	0.000939318
CCG012130	122.235	-1.27738	0.34257	-3.72883	0.000192372	0.00122931
CCG012139	8721.7	1.20439	0.117453	10.2542	1.13e-24	4.35e-23
CCG012149	365.756	1.12826	0.236989	4.7608	1.93e-06	1.72e-05
CCG012171	3235.23	-1.8592	0.183192	-10.1489	3.35e-24	1.25e-22
CCG012219	34.7586	-2.04216	0.63094	-3.2367	0.0012092	0.00633307
CCG012224	2050.33	1.23836	0.149034	8.30926	9.63e-17	2.31e-15
CCG012226	966.776	1.70973	0.178358	9.58595	9.16e-22	3.03e-20
CCG012227	1525.69	1.59185	0.157529	10.1051	5.25e-24	1.93e-22
CCG012235	12665.4	3.19045	0.14329	22.2657	7.96e-110	4.24e-107
CCG012249	141.604	-1.21644	0.291866	-4.16782	3.08e-05	0.000226974
CCG012259	662.396	1.21854	0.236487	5.15265	2.57e-07	2.61e-06
CCG012268	3509.32	-1.53505	0.143056	-10.7304	7.33e-27	3.08e-25
CCG012289	445.665	-2.62094	0.222644	-11.7719	5.45e-32	2.96e-30
CCG012290	483.563	-3.0986	0.265818	-11.6568	2.12e-31	1.12e-29
CCG012291	162.265	-3.49669	0.430517	-8.12206	4.58e-16	1.05e-14
CCG012292	86.8698	2.28246	0.493968	4.62067	3.82e-06	3.28e-05
CCG012303	63.8165	1.63219	0.429634	3.79903	0.000145264	0.000948795
CCG012310	378.201	1.08175	0.256234	4.22173	2.42e-05	0.000183135
CCG012313	161.125	1.13929	0.2816	4.04578	5.21e-05	0.000370073
CCG012343	216.856	2.62323	0.467259	5.61409	1.98e-08	2.32e-07
CCG012345	3555.71	1.05728	0.118871	8.8943	5.88e-19	1.61e-17
CCG012346	1286.41	2.5092	0.682024	3.67905	0.000234101	0.00146976
CCG012356	9.752	6.8573	1.82746	3.75236	0.000175178	0.001128
CCG012386	106.399	2.23513	0.458052	4.87963	1.06e-06	9.91e-06
CCG012392	138.117	4.3105	0.409746	10.5199	6.99e-26	2.8e-24
CCG012406	1210.73	-1.1628	0.208769	-5.56979	2.55e-08	2.95e-07
CCG012420	364.374	3.53891	0.264205	13.3945	6.51e-41	5.08e-39
CCG012433	93.1754	1.53787	0.358485	4.28991	1.79e-05	0.00013886
CCG012438	185.455	2.95455	0.286636	10.3077	6.51e-25	2.52e-23
CCG012440	1009.09	2.88623	0.229841	12.5575	3.61e-36	2.32e-34
CCG012505	599.213	1.99213	0.242772	8.20576	2.29e-16	5.35e-15
CCG012518	200.77	-1.23443	0.262977	-4.69406	2.68e-06	2.35e-05
CCG012521	1743.3	1.16255	0.159926	7.26931	3.61e-13	6.71e-12
CCG012528	359.957	-1.97284	0.295503	-6.67621	2.45e-11	3.86e-10
CCG012589	2674.19	-2.13784	0.157474	-13.5759	5.57e-42	4.59e-40
CCG012593	53.517	3.67657	0.570801	6.44107	1.19e-10	1.76e-09
CCG012595	72.7899	-2.59439	0.527564	-4.91767	8.76e-07	8.26e-06
CCG012621	976.708	1.22864	0.16597	7.4028	1.33e-13	2.55e-12
CCG012623	909.359	-1.43381	0.157795	-9.08653	1.02e-19	2.95e-18
CCG012626	1213.57	-2.26962	0.322167	-7.04485	1.86e-12	3.23e-11
CCG012627	1225.18	-2.73017	0.289147	-9.44217	3.65e-21	1.16e-19
CCG012645	82.7255	-1.20964	0.374558	-3.22952	0.00123997	0.00648184
CCG012647	75.2333	-1.33709	0.393329	-3.39942	0.000675277	0.00379005
CCG012648	283.156	-1.19857	0.235917	-5.08048	3.76e-07	3.75e-06
CCG012649	622.861	1.07102	0.165403	6.47518	9.47e-11	1.42e-09
CCG012655	376.659	-4.32662	0.428078	-10.1071	5.14e-24	1.9e-22
CCG012678	1296.62	1.35593	0.144939	9.35519	8.34e-21	2.59e-19
CCG012681	402.151	-1.0755	0.261585	-4.11148	3.93e-05	0.000285046
CCG012691	2057.48	2.51744	0.191174	13.1683	1.34e-39	9.93e-38
CCG012694	1083.77	-1.85475	0.273577	-6.7796	1.21e-11	1.95e-10
CCG012706	1347.85	-1.18728	0.137334	-8.64522	5.37e-18	1.38e-16
CCG012711	417.71	-1.58618	0.273743	-5.79444	6.86e-09	8.5e-08
CCG012728	286.833	1.12154	0.222977	5.02985	4.91e-07	4.82e-06
CCG012734	149.919	1.5551	0.314332	4.94731	7.52e-07	7.19e-06
CCG012757	154.329	2.57531	0.320395	8.03792	9.14e-16	2.06e-14
CCG012783	2080.1	-2.2066	0.25174	-8.76537	1.86e-18	4.91e-17
CCG012793	49.3098	2.36369	0.526473	4.48966	7.13e-06	5.88e-05
CCG012804	90.7297	1.41787	0.402523	3.52246	0.000427569	0.00252966
CCG012806	96.2942	3.81726	0.430606	8.86486	7.66e-19	2.09e-17
CCG012815	246.471	3.22887	0.347287	9.29741	1.44e-20	4.4e-19
CCG012848	4037.93	1.52063	0.146946	10.3482	4.27e-25	1.68e-23
CCG012860	403.535	3.92632	0.26463	14.837	8.44e-50	8.71e-48
CCG012876	336.177	1.0805	0.209979	5.14574	2.66e-07	2.71e-06
CCG012887	108.609	4.10943	0.447017	9.19299	3.82e-20	1.14e-18
CCG012902	83.6496	3.08604	0.536198	5.75541	8.64e-09	1.06e-07
CCG012914	425.28	1.46499	0.27082	5.40945	6.32e-08	6.97e-07
CCG012917	344.25	1.00833	0.209267	4.81838	1.45e-06	1.32e-05
CCG012968	175.922	1.16334	0.31904	3.64637	0.000265974	0.00164856
CCG012982	250.33	1.36696	0.232365	5.88283	4.03e-09	5.13e-08
CCG012983	66.8121	2.50721	0.470988	5.3233	1.02e-07	1.1e-06
CCG012991	58.2491	1.60037	0.454505	3.52114	0.000429703	0.00254159
CCG013020	360.677	-1.08779	0.276736	-3.9308	8.47e-05	0.00057533
CCG013026	440.368	2.09796	0.211457	9.92149	3.36e-23	1.19e-21
CCG013042	117.572	1.36922	0.407011	3.36409	0.000767965	0.00424086
CCG013067	966.446	-1.69393	0.170064	-9.96052	2.27e-23	8.16e-22
CCG013081	80.1272	6.44393	0.814738	7.9092	2.59e-15	5.65e-14
CCG013091	22.3265	2.48345	0.775528	3.20228	0.00136345	0.00704478
CCG013092	109.772	1.74878	0.355039	4.9256	8.41e-07	7.95e-06
CCG013093	109.092	1.79813	0.350201	5.13456	2.83e-07	2.86e-06
CCG013094	8858.49	1.07569	0.127835	8.41469	3.94e-17	9.62e-16
CCG013103	41.502	2.02579	0.550328	3.68106	0.000232268	0.0014595
CCG013107	4490.05	1.77994	0.13921	12.786	1.96e-37	1.34e-35
CCG013112	7187	-2.0064	0.470061	-4.2684	1.97e-05	0.000151818
CCG013127	183.765	-1.02137	0.30655	-3.33182	0.000862787	0.00469072
CCG013132	65.5009	1.84454	0.467012	3.94967	7.83e-05	0.00053716
CCG013190	117.686	3.64502	0.403477	9.03402	1.65e-19	4.72e-18
CCG013191	37.8214	2.83261	0.727862	3.89169	9.96e-05	0.000667977
CCG013193	34.6362	2.88931	0.884229	3.2676	0.00108464	0.00574959
CCG013203	3862.02	-2.3564	0.234785	-10.0364	1.05e-23	3.82e-22
CCG013208	62713.5	1.21752	0.156053	7.80196	6.1e-15	1.29e-13
CCG013214	206.058	6.08723	0.496484	12.2607	1.47e-34	8.94e-33
CCG013215	8000.81	1.84072	0.158815	11.5904	4.61e-31	2.39e-29
CCG013241	36.0881	3.86763	0.753984	5.1296	2.9e-07	2.94e-06
CCG013258	789.7	1.15848	0.162264	7.13944	9.37e-13	1.67e-11
CCG013273	1720.36	1.82068	0.145317	12.529	5.18e-36	3.31e-34
CCG013274	1775.1	1.77545	0.15516	11.4427	2.56e-30	1.28e-28
CCG013282	162.453	1.36388	0.324611	4.20159	2.65e-05	0.00019816
CCG013283	240.947	1.11909	0.288077	3.88469	0.000102459	0.000686376
CCG013286	1056.18	1.48672	0.199557	7.4501	9.33e-14	1.8e-12
CCG013304	557.398	-1.25846	0.19619	-6.41452	1.41e-10	2.09e-09
CCG013315	860.06	-1.41451	0.188944	-7.48639	7.08e-14	1.38e-12
CCG013320	215.992	3.46955	0.444274	7.80947	5.74e-15	1.22e-13
CCG013321	36.0417	2.09182	0.569551	3.67276	0.000239949	0.00150259
CCG013325	2015.48	1.19559	0.155586	7.68443	1.54e-14	3.15e-13
CCG013328	9351.47	1.07382	0.153034	7.01691	2.27e-12	3.92e-11
CCG013329	347.192	1.52708	0.223104	6.84469	7.66e-12	1.26e-10
CCG013330	544.563	4.28276	0.251222	17.0477	3.63e-65	6.02e-63
CCG013331	226.944	2.34683	0.266582	8.8034	1.33e-18	3.56e-17
CCG013355	922.261	-1.47905	0.288284	-5.13055	2.89e-07	2.92e-06
CCG013356	2853.31	1.57903	0.158558	9.95871	2.31e-23	8.29e-22
CCG013361	256.207	1.91073	0.245996	7.76732	8.02e-15	1.68e-13
CCG013370	4545.44	-1.60029	0.119477	-13.3941	6.54e-41	5.09e-39
CCG013372	1476.65	-1.33602	0.175588	-7.60887	2.77e-14	5.54e-13
CCG013377	318.251	-1.20554	0.246356	-4.89349	9.91e-07	9.26e-06
CCG013379	1735	-1.51084	0.127475	-11.8521	2.1e-32	1.17e-30
CCG013383	2158.22	1.23228	0.142182	8.6669	4.44e-18	1.15e-16
CCG013388	32.4643	4.26145	0.792352	5.37823	7.52e-08	8.23e-07
CCG013411	183.946	-2.25745	0.306619	-7.36238	1.81e-13	3.43e-12
CCG013412	21.3206	4.48153	0.993553	4.51061	6.46e-06	5.37e-05
CCG013416	377.634	-1.32678	0.242639	-5.46812	4.55e-08	5.09e-07
CCG013418	80.6542	-1.7539	0.412285	-4.25409	2.1e-05	0.000161234
CCG013422	40819.9	1.229	0.112316	10.9423	7.23e-28	3.19e-26
CCG013423	124.229	-1.29414	0.3241	-3.99303	6.52e-05	0.000453871
CCG013438	93.7799	3.95794	0.4607	8.59113	8.61e-18	2.19e-16
CCG013446	4168.1	1.88824	0.190678	9.90276	4.05e-23	1.43e-21
CCG013475	263.632	1.06806	0.261256	4.08818	4.35e-05	0.000312961
CCG013497	85.6191	3.23186	0.482616	6.69655	2.13e-11	3.38e-10
CCG013505	248.974	2.92757	0.287882	10.1693	2.72e-24	1.02e-22
CCG013509	14219.9	2.40634	0.109777	21.9201	1.67e-106	8.11e-104
CCG013527	1502.34	1.06969	0.160581	6.6614	2.71e-11	4.26e-10
CCG013535	69.8852	2.93103	0.529484	5.53564	3.1e-08	3.55e-07
CCG013543	23.9602	8.15438	1.62575	5.01578	5.28e-07	5.16e-06
CCG013567	435.621	1.63031	0.378938	4.30232	1.69e-05	0.000131678
CCG013585	1205.01	-1.21336	0.158498	-7.65534	1.93e-14	3.91e-13
CCG013595	304.621	3.2605	0.249543	13.0659	5.16e-39	3.73e-37
CCG013743	869.722	-1.20888	0.192901	-6.26683	3.68e-10	5.21e-09
CCG013761	2251.42	-1.52604	0.164409	-9.28198	1.66e-20	5.06e-19
CCG013765	109.415	6.07624	0.63413	9.582	9.52e-22	3.14e-20
CCG013766	3041.81	5.0393	0.164313	30.6689	1.48e-206	1.62e-202
CCG013767	210.925	6.13425	0.547931	11.1953	4.3e-29	2.05e-27
CCG013768	2398.15	4.60329	0.253388	18.167	9.42e-74	1.94e-71
CCG013769	33.734	4.11357	0.799558	5.1448	2.68e-07	2.72e-06
CCG013770	282.505	-3.34919	0.284632	-11.7667	5.79e-32	3.13e-30
CCG013783	3885.67	1.33849	0.146671	9.12578	7.12e-20	2.08e-18
CCG013805	661.856	1.45507	0.164393	8.85116	8.66e-19	2.35e-17
CCG013806	3334.32	1.912	0.118371	16.1526	1.09e-58	1.55e-56
CCG013813	30.9698	1.94054	0.622073	3.11947	0.00181176	0.00907374
CCG013817	292.082	1.05204	0.270594	3.88789	0.000101119	0.000677879
CCG013822	494.316	1.3192	0.183275	7.19792	6.11e-13	1.11e-11
CCG013823	248.858	1.81379	0.319891	5.67002	1.43e-08	1.7e-07
CCG013824	3034.86	1.68465	0.141186	11.9321	8.05e-33	4.51e-31
CCG013831	1017.77	1.53472	0.171611	8.94305	3.79e-19	1.06e-17
CCG013842	1233.21	1.09001	0.155461	7.01145	2.36e-12	4.06e-11
CCG013848	161.177	4.26851	0.383565	11.1285	9.11e-29	4.27e-27
CCG013849	77.6451	2.05653	0.398846	5.15618	2.52e-07	2.57e-06
CCG013873	309.866	-1.90876	0.304441	-6.26972	3.62e-10	5.12e-09
CCG013878	161.608	-1.41527	0.330823	-4.27801	1.89e-05	0.00014587
CCG013901	116.473	-1.29036	0.371992	-3.46877	0.000522841	0.00302287
CCG013913	151.426	2.55851	0.409903	6.24176	4.33e-10	6.09e-09
CCG013925	202.967	1.19116	0.249027	4.78326	1.72e-06	1.55e-05
CCG013926	1250.86	1.02743	0.303698	3.38306	0.000716838	0.00398951
CCG013935	335.398	-1.29261	0.229441	-5.63373	1.76e-08	2.08e-07
CCG013936	1558.93	1.57519	0.247509	6.36416	1.96e-10	2.84e-09
CCG013940	238.835	1.52447	0.264667	5.75996	8.41e-09	1.03e-07
CCG013952	4870.55	1.27935	0.122381	10.4539	1.41e-25	5.59e-24
CCG013964	8519.38	1.44306	0.123006	11.7316	8.78e-32	4.72e-30
CCG013987	339.683	1.62919	0.232991	6.99249	2.7e-12	4.62e-11
CCG014032	147.65	1.37781	0.314693	4.37827	1.2e-05	9.52e-05
CCG014039	2031.44	2.15626	0.165618	13.0194	9.49e-39	6.76e-37
CCG014047	3266.82	-2.67389	0.753795	-3.54724	0.000389291	0.00232856
CCG014063	37.0412	-2.43804	0.614053	-3.97041	7.17e-05	0.000495262
CCG014069	671.233	-1.39119	0.173535	-8.01676	1.09e-15	2.44e-14
CCG014088	53.8732	5.84642	0.868852	6.72891	1.71e-11	2.73e-10
CCG014090	36.8026	4.70016	0.794959	5.91246	3.37e-09	4.34e-08
CCG014094	500.376	-3.54603	0.401026	-8.8424	9.37e-19	2.53e-17
CCG014105	273.021	1.74508	0.28108	6.20847	5.35e-10	7.45e-09
CCG014111	46.553	2.42778	0.518569	4.68171	2.84e-06	2.49e-05
CCG014112	3393.67	1.02597	0.160859	6.37807	1.79e-10	2.61e-09
CCG014128	1390.4	-1.35788	0.251118	-5.40734	6.4e-08	7.05e-07
CCG014133	1087.32	3.66316	0.299343	12.2373	1.96e-34	1.19e-32
CCG014135	60.913	3.79467	0.555185	6.83497	8.2e-12	1.35e-10
CCG014143	76.258	4.42391	0.549067	8.05713	7.81e-16	1.77e-14
CCG014154	100.39	3.19204	0.46449	6.87215	6.32e-12	1.05e-10
CCG014170	1218.89	-1.01489	0.192365	-5.27586	1.32e-07	1.4e-06
CCG014171	221.173	-1.44303	0.278345	-5.18432	2.17e-07	2.24e-06
CCG014175	309.244	2.01113	0.279837	7.18679	6.63e-13	1.19e-11
CCG014196	246.391	1.61357	0.294326	5.48224	4.2e-08	4.73e-07
CCG014199	804.594	2.4935	0.267423	9.32417	1.12e-20	3.44e-19
CCG014202	3439.34	-1.4797	0.202234	-7.31678	2.54e-13	4.76e-12
CCG014237	366.494	4.03728	0.276424	14.6054	2.59e-48	2.55e-46
CCG014244	20.4288	-2.89544	0.869737	-3.3291	0.000871282	0.00472873
CCG014251	28.8857	3.00261	0.717728	4.18349	2.87e-05	0.000213018
CCG014272	289.56	1.46799	0.222509	6.59742	4.18e-11	6.49e-10
CCG014274	214.672	2.6253	0.331333	7.92343	2.31e-15	5.08e-14
CCG014278	8005.99	2.43443	0.20104	12.1092	9.44e-34	5.5e-32
CCG014289	308.346	1.02873	0.280038	3.67353	0.00023922	0.00149845
CCG014291	168.896	1.78088	0.306878	5.8032	6.51e-09	8.09e-08
CCG014292	172.761	1.61403	0.322051	5.01171	5.39e-07	5.27e-06
CCG014293	67.8142	2.40168	0.497748	4.82508	1.4e-06	1.28e-05
CCG014305	1047.31	1.53419	0.204911	7.48713	7.04e-14	1.37e-12
CCG014312	3683.63	1.40987	0.156539	9.0065	2.13e-19	6.03e-18
CCG014314	631.677	-1.23781	0.189562	-6.52986	6.58e-11	9.99e-10
CCG014318	1349.47	-1.55201	0.232957	-6.66222	2.7e-11	4.24e-10
CCG014319	153.854	-1.17202	0.297185	-3.94374	8.02e-05	0.000549068
CCG014327	25.1319	4.37788	0.930231	4.70622	2.52e-06	2.23e-05
CCG014334	2126.08	1.0807	0.205593	5.25648	1.47e-07	1.55e-06
CCG014335	2435.1	1.14884	0.193529	5.93627	2.92e-09	3.79e-08
CCG014368	243.136	1.65177	0.299369	5.5175	3.44e-08	3.91e-07
CCG014385	1408.63	-1.13664	0.178987	-6.3504	2.15e-10	3.1e-09
CCG014413	51.1103	9.24961	1.51691	6.09768	1.08e-09	1.46e-08
CCG014414	1193.26	1.22762	0.189948	6.46295	1.03e-10	1.53e-09
CCG014416	31.7207	2.23922	0.670207	3.34109	0.000834514	0.00455286
CCG014421	2309.02	1.79636	0.243399	7.3803	1.58e-13	3.01e-12
CCG014425	369.75	1.77899	0.32465	5.47971	4.26e-08	4.79e-07
CCG014446	125.599	1.05021	0.310917	3.37779	0.000730703	0.00405833
CCG014467	5229.22	1.10969	0.142451	7.79002	6.7e-15	1.41e-13
CCG014484	625.386	1.64418	0.195814	8.39664	4.59e-17	1.12e-15
CCG014491	5754.35	2.38045	0.120061	19.8271	1.74e-87	5.21e-85
CCG014500	191.666	-1.67054	0.269425	-6.20041	5.63e-10	7.83e-09
CCG014538	1197.94	3.49757	0.280787	12.4563	1.29e-35	8.14e-34
CCG014555	55.6692	1.44252	0.457782	3.15111	0.00162649	0.00823643
CCG014575	313.03	2.50707	0.226854	11.0515	2.16e-28	9.93e-27
CCG014591	44.5599	3.56072	0.700397	5.08385	3.7e-07	3.69e-06
CCG014606	75.1941	-1.50885	0.420808	-3.5856	0.000336302	0.00204049
CCG014607	168.256	-1.24617	0.324054	-3.84555	0.000120282	0.000796816
CCG014620	123.803	6.25427	0.629931	9.9285	3.13e-23	1.11e-21
CCG014621	716.669	7.43683	0.385199	19.3065	4.74e-83	1.23e-80
CCG014624	2850.14	1.57273	0.14227	11.0546	2.08e-28	9.61e-27
CCG014625	171.797	1.11561	0.276398	4.03624	5.43e-05	0.000384135
CCG014626	1335.33	2.49693	0.156515	15.9533	2.7e-57	3.64e-55
CCG014634	299.655	1.37336	0.219679	6.25166	4.06e-10	5.72e-09
CCG014641	1015.9	1.43336	0.263678	5.43602	5.45e-08	6.05e-07
CCG014646	535.429	1.2256	0.316875	3.86776	0.000109839	0.00073185
CCG014654	87.5494	1.93732	0.393557	4.9226	8.54e-07	8.06e-06
CCG014656	14.1725	-4.05871	1.2664	-3.20491	0.00135104	0.00699221
CCG014668	13.8312	5.89232	1.6684	3.53172	0.00041287	0.00245065
CCG014670	2022.83	4.06216	0.834488	4.86784	1.13e-06	1.05e-05
CCG014679	210.808	1.05267	0.309574	3.4004	0.000672883	0.00377905
CCG014700	156.496	-1.46914	0.295218	-4.97645	6.48e-07	6.23e-06
CCG014719	511.185	-1.3424	0.183688	-7.30807	2.71e-13	5.07e-12
CCG014732	573.69	1.69857	0.226081	7.51312	5.77e-14	1.13e-12
CCG014735	1858.81	-1.50375	0.19626	-7.66201	1.83e-14	3.72e-13
CCG014770	4932.13	1.09931	0.177095	6.20747	5.38e-10	7.5e-09
CCG014777	65.349	-1.57872	0.474105	-3.32988	0.000868821	0.00471766
CCG014797	1638.4	1.911	0.171649	11.1331	8.65e-29	4.07e-27
CCG014823	305.878	-1.48014	0.334319	-4.42733	9.54e-06	7.72e-05
CCG014832	45.0036	1.82414	0.548807	3.32382	0.00088792	0.00480585
CCG014850	100.529	-1.94553	0.559401	-3.47788	0.000505394	0.00293217
CCG014856	66974.7	-1.04104	0.110086	-9.45654	3.18e-21	1.02e-19
CCG014860	177.892	2.79955	0.291252	9.61211	7.11e-22	2.36e-20
CCG014861	382.362	2.66423	0.227188	11.727	9.27e-32	4.95e-30
CCG014862	1281.52	3.82637	0.914269	4.18517	2.85e-05	0.000211595
CCG014874	1188.09	-1.26601	0.159637	-7.93058	2.18e-15	4.81e-14
CCG014878	553.943	-1.55704	0.187827	-8.28973	1.14e-16	2.7e-15
CCG014892	2055.77	-2.01887	0.214848	-9.39672	5.63e-21	1.77e-19
CCG014900	91.3674	1.55184	0.35982	4.31283	1.61e-05	0.000126064
CCG014913	228.802	7.32285	1.72446	4.24647	2.17e-05	0.000166109
CCG014921	543.134	1.01397	0.178194	5.69025	1.27e-08	1.52e-07
CCG014922	123.481	2.56851	0.351506	7.30717	2.73e-13	5.1e-12
CCG014923	104.668	3.89828	0.447951	8.70246	3.25e-18	8.49e-17
CCG014924	689.781	1.74174	0.182892	9.52331	1.68e-21	5.44e-20
CCG014926	5014.56	3.65922	0.207052	17.673	6.78e-70	1.28e-67
CCG014946	672.097	1.1225	0.163205	6.87782	6.08e-12	1.01e-10
CCG014948	4784.83	3.22661	0.117222	27.5255	8.69e-167	2.11e-163
CCG015012	3137.23	-1.55326	0.116332	-13.3519	1.15e-40	8.92e-39
CCG015022	2488.44	-1.2989	0.173579	-7.48304	7.26e-14	1.41e-12
CCG015035	346.504	2.49066	0.253533	9.82381	8.89e-23	3.1e-21
CCG015041	165.206	-1.00096	0.292898	-3.41745	0.000632103	0.00358083
CCG015045	81.2851	1.39429	0.408304	3.41483	0.000638217	0.00360798
CCG015059	283.175	-2.60518	0.247521	-10.5251	6.62e-26	2.66e-24
CCG015091	108.022	1.66784	0.524882	3.17756	0.00148522	0.00760919
CCG015102	234.333	-1.5857	0.248145	-6.39024	1.66e-10	2.42e-09
CCG015113	32.9805	4.49641	0.941957	4.77348	1.81e-06	1.63e-05
CCG015135	689.39	-2.35329	0.210546	-11.1771	5.28e-29	2.5e-27
CCG015166	841.478	-1.15699	0.165344	-6.99744	2.61e-12	4.48e-11
CCG015169	370.884	-1.63277	0.330898	-4.93436	8.04e-07	7.63e-06
CCG015201	200.899	-1.57919	0.4444	-3.55353	0.000380098	0.00227965
CCG015203	219.377	1.00899	0.316228	3.1907	0.00141928	0.00730561
CCG015289	2199.1	-2.22893	0.517533	-4.30684	1.66e-05	0.000129155
CCG015322	5230.04	1.29596	0.153811	8.42569	3.59e-17	8.79e-16
CCG015328	181.608	-1.89753	0.325579	-5.82816	5.6e-09	6.99e-08
CCG015332	136.647	1.36197	0.408533	3.33381	0.000856651	0.00465968
CCG015347	76.9964	1.40016	0.450254	3.10971	0.0018727	0.00934471
CCG015353	167.489	1.8851	0.287522	6.55637	5.51e-11	8.45e-10
CCG015368	1120.95	-1.9143	0.201713	-9.49024	2.31e-21	7.44e-20
CCG015378	1924.71	1.02997	0.12989	7.92955	2.2e-15	4.84e-14
CCG015406	3002.39	1.2703	0.163807	7.75485	8.84e-15	1.85e-13
CCG015414	188.614	3.29141	0.344423	9.55631	1.22e-21	3.98e-20
CCG015416	178.336	2.89156	0.377905	7.65155	1.99e-14	4.02e-13
CCG015436	21.6991	2.66722	0.778791	3.42482	0.000615196	0.0034941
CCG015439	156.135	-1.53594	0.363745	-4.22258	2.42e-05	0.000182826
CCG015449	352.399	-1.25942	0.269628	-4.67094	3e-06	2.61e-05
CCG015457	564.835	5.35745	1.21357	4.41462	1.01e-05	8.17e-05
CCG015461	1978.12	4.97593	0.631474	7.87986	3.28e-15	7.09e-14
CCG015462	1671.52	-1.89093	0.154192	-12.2635	1.42e-34	8.66e-33
CCG015469	190.078	-1.04623	0.256558	-4.07795	4.54e-05	0.000326365
CCG015479	519.412	1.1796	0.199005	5.92751	3.08e-09	3.99e-08
CCG015480	840.046	1.70652	0.15635	10.9147	9.8e-28	4.29e-26
CCG015481	1633.97	1.04156	0.141527	7.3594	1.85e-13	3.49e-12
CCG015488	790.292	1.07949	0.151316	7.134	9.75e-13	1.73e-11
CCG015515	87.605	-1.4321	0.381556	-3.75333	0.000174502	0.00112398
CCG015521	1524.33	-1.6988	0.215519	-7.88237	3.21e-15	6.96e-14
CCG015529	4154.28	1.3696	0.21589	6.34399	2.24e-10	3.23e-09
CCG015562	201.657	-1.49533	0.308752	-4.84313	1.28e-06	1.18e-05
CCG015567	901.404	1.3428	0.147122	9.12711	7.04e-20	2.06e-18
CCG015600	1171.36	-1.56953	0.213402	-7.35479	1.91e-13	3.61e-12
CCG015610	109.769	1.19205	0.332254	3.58775	0.000333541	0.00202599
CCG015668	112.008	1.94714	0.403571	4.82478	1.4e-06	1.28e-05
CCG015674	6080.67	1.65067	0.116327	14.1899	1.06e-45	9.59e-44
CCG015709	2693.01	-1.20515	0.167926	-7.17668	7.14e-13	1.28e-11
CCG015726	107.266	1.52509	0.334232	4.56298	5.04e-06	4.26e-05
CCG015727	1157.88	1.41269	0.257896	5.47775	4.31e-08	4.84e-07
CCG015730	3901.94	2.62912	0.13246	19.8484	1.14e-87	3.5e-85
CCG015742	6201.95	2.49696	0.21959	11.371	5.83e-30	2.88e-28
CCG015743	333.021	2.57396	0.242547	10.6122	2.62e-26	1.07e-24
CCG015752	115.162	3.61251	0.396097	9.12027	7.49e-20	2.18e-18
CCG015802	14.8791	4.961	1.34712	3.68266	0.000230813	0.00145236
CCG015820	461.112	1.82543	0.207569	8.79434	1.44e-18	3.84e-17
CCG015821	58.0634	4.21282	0.579577	7.26878	3.63e-13	6.72e-12
CCG015822	241.888	1.41598	0.245255	5.77352	7.76e-09	9.56e-08
CCG015831	19.7502	5.38705	1.31437	4.09856	4.16e-05	0.000300431
CCG015833	1273.61	1.22596	0.210152	5.83367	5.42e-09	6.78e-08
CCG015838	391.394	-1.60144	0.217574	-7.36046	1.83e-13	3.47e-12
CCG015842	1758.83	-2.32752	0.629439	-3.69776	0.000217507	0.00137505
CCG015905	65.3221	1.78072	0.442092	4.02794	5.63e-05	0.000397047
CCG015908	311.035	2.14398	0.331118	6.47498	9.48e-11	1.42e-09
CCG015909	702.808	1.99064	0.21459	9.27644	1.75e-20	5.33e-19
CCG015912	12025.5	1.25622	0.113202	11.0971	1.3e-28	6.02e-27
CCG015930	530.141	-3.01967	0.255122	-11.8362	2.54e-32	1.4e-30
CCG015953	3371.82	1.08549	0.123584	8.78345	1.59e-18	4.21e-17
CCG015960	451.163	1.16971	0.223423	5.23542	1.65e-07	1.73e-06
CCG015961	198.783	1.63265	0.267998	6.09203	1.11e-09	1.51e-08
CCG015972	3804.44	1.43337	0.122988	11.6545	2.18e-31	1.14e-29
CCG015981	541.24	1.28756	0.180523	7.13238	9.86e-13	1.75e-11
CCG015995	114.703	1.7379	0.323783	5.36749	7.98e-08	8.71e-07
CCG016001	816.63	1.49731	0.156232	9.58388	9.35e-22	3.09e-20
CCG016009	15117.4	-1.54997	0.214425	-7.22848	4.88e-13	8.93e-12
CCG016012	949.336	-1.66974	0.195491	-8.54131	1.33e-17	3.34e-16
CCG016044	482.584	1.33206	0.185223	7.19169	6.4e-13	1.16e-11
CCG016051	97.4896	1.92601	0.355591	5.41635	6.08e-08	6.72e-07
CCG016060	1907.92	2.03409	0.162284	12.5341	4.86e-36	3.11e-34
CCG016066	2322.15	1.03255	0.131061	7.87836	3.32e-15	7.17e-14
CCG016069	2810.19	-1.54567	0.130275	-11.8646	1.81e-32	1.01e-30
CCG016101	43.3984	-2.22836	0.537371	-4.14677	3.37e-05	0.000247114
CCG016102	1261.23	1.13284	0.138482	8.18039	2.83e-16	6.56e-15
CCG016116	123.506	1.11297	0.346827	3.209	0.001332	0.00690837
CCG016119	116.085	1.42512	0.324037	4.39801	1.09e-05	8.75e-05
CCG016167	3694.81	1.42352	0.133839	10.636	2.03e-26	8.34e-25
CCG016179	259.617	5.79004	0.458536	12.6272	1.49e-36	9.9e-35
CCG016181	572.013	4.49893	1.06239	4.23473	2.29e-05	0.00017436
CCG016211	65.7073	-2.80886	0.474906	-5.91456	3.33e-09	4.29e-08
CCG016229	3044.82	1.27095	0.11738	10.8276	2.55e-27	1.1e-25
CCG016234	516.066	-1.04719	0.331495	-3.15898	0.0015832	0.00803959
CCG016240	7081.3	1.52756	0.146201	10.4484	1.49e-25	5.91e-24
CCG016241	1078.83	-1.25487	0.182428	-6.87871	6.04e-12	1.01e-10
CCG016290	244.462	3.66966	0.2805	13.0825	4.14e-39	3.01e-37
CCG016291	99.914	-1.37833	0.36218	-3.80565	0.00014143	0.000925138
CCG016303	51.5152	-4.01128	0.641117	-6.25671	3.93e-10	5.55e-09
CCG016305	2518.35	2.86666	0.144708	19.81	2.44e-87	7.21e-85
CCG016326	1112.27	1.03805	0.185618	5.59239	2.24e-08	2.61e-07
CCG016378	3355.88	2.77771	0.117777	23.5844	5.57e-123	3.8e-120
CCG016385	197.407	2.32992	0.282391	8.25067	1.58e-16	3.72e-15
CCG016389	920.87	1.19734	0.14517	8.24785	1.61e-16	3.8e-15
CCG016402	304.786	-1.01829	0.212377	-4.7947	1.63e-06	1.47e-05
CCG016403	14.4737	5.95916	1.77848	3.3507	0.000806079	0.00442311
CCG016443	189.314	1.0529	0.25498	4.12935	3.64e-05	0.00026527
CCG016451	1034.54	1.36057	0.180244	7.54846	4.4e-14	8.7e-13
CCG016480	250.286	-2.53103	0.297161	-8.51736	1.63e-17	4.08e-16
CCG016481	558.669	1.7913	0.274618	6.5229	6.9e-11	1.04e-09
CCG016487	1238.56	-2.2169	0.301001	-7.36509	1.77e-13	3.36e-12
CCG016489	7617.23	1.76112	0.129187	13.6323	2.57e-42	2.15e-40
CCG016498	540.365	-1.19387	0.360863	-3.30836	0.000938441	0.00503936
CCG016508	10755.8	1.28939	0.118711	10.8616	1.76e-27	7.65e-26
CCG016512	906.048	1.21302	0.330333	3.67212	0.000240547	0.00150547
CCG016534	2534.96	-1.54331	0.171309	-9.00894	2.08e-19	5.91e-18
CCG016560	112.075	-2.74884	0.471726	-5.82719	5.64e-09	7.03e-08
CCG016578	41.81	2.59651	0.559515	4.64064	3.47e-06	3e-05
CCG016610	3049.09	7.02749	0.23703	29.6482	3.58e-193	2.61e-189
CCG016611	180.66	2.98446	0.298186	10.0087	1.4e-23	5.05e-22
CCG016618	3464.29	-1.12404	0.142689	-7.87752	3.34e-15	7.2e-14
CCG016624	940.958	1.11913	0.218381	5.12465	2.98e-07	3.01e-06
CCG016631	11.9151	7.14695	1.752	4.0793	4.52e-05	0.000324615
CCG016645	299.823	1.57333	0.245292	6.41413	1.42e-10	2.09e-09
CCG016647	743.501	-1.56566	0.262422	-5.96619	2.43e-09	3.19e-08
CCG016652	15.6361	2.9064	0.934455	3.11027	0.00186919	0.00933358
CCG016662	6.03785	6.16752	1.99186	3.09636	0.00195912	0.00970943
CCG016665	1944	-1.14287	0.222489	-5.13674	2.8e-07	2.83e-06
CCG016667	36368.6	1.58422	0.108174	14.6451	1.45e-48	1.45e-46
CCG016668	8179.44	1.01022	0.144893	6.97219	3.12e-12	5.31e-11
CCG016669	717.02	3.00881	0.192672	15.6162	5.64e-55	6.97e-53
CCG016670	2373.15	2.79907	0.144571	19.3612	1.64e-83	4.43e-81
CCG016677	2101.42	-1.53104	0.171628	-8.9207	4.63e-19	1.29e-17
CCG016682	1517.82	2.03592	0.257965	7.89222	2.97e-15	6.44e-14
CCG016692	3498.77	1.02147	0.112645	9.06802	1.21e-19	3.48e-18
CCG016718	33.6931	6.1959	1.17434	5.27606	1.32e-07	1.4e-06
CCG016724	3582.96	1.14529	0.172144	6.65311	2.87e-11	4.49e-10
CCG016734	332.822	1.00983	0.319948	3.15624	0.00159815	0.00810607
CCG016749	89.4293	4.44134	0.578127	7.6823	1.56e-14	3.2e-13
CCG016750	174.472	4.02478	0.365751	11.0041	3.65e-28	1.65e-26
CCG016751	25.1954	6.77132	1.5715	4.30882	1.64e-05	0.000128237
CCG016754	710.063	1.6593	0.184554	8.99085	2.45e-19	6.93e-18
CCG016755	3404.39	1.44305	0.119676	12.0579	1.76e-33	1.02e-31
CCG016756	180.345	-2.36025	0.368922	-6.39769	1.58e-10	2.32e-09
CCG016761	12325.3	1.41848	0.142593	9.94773	2.58e-23	9.23e-22
CCG016788	13.697	4.21821	1.26415	3.3368	0.000847476	0.00461666
CCG016792	41.5912	-3.43656	0.685696	-5.01178	5.39e-07	5.27e-06
CCG016799	284.894	2.00624	0.240637	8.33718	7.61e-17	1.84e-15
CCG016901	1090.6	1.50724	0.1986	7.5893	3.22e-14	6.4e-13
CCG016914	255.616	1.27059	0.228553	5.55928	2.71e-08	3.12e-07
CCG016930	40.4443	2.34853	0.585681	4.00991	6.07e-05	0.000425469
CCG016972	18440.4	2.37245	0.106592	22.2572	9.6e-110	5e-107
CCG016982	1397.93	1.04135	0.16444	6.33267	2.41e-10	3.46e-09
CCG017010	682.897	4.3922	0.261083	16.823	1.66e-63	2.62e-61
CCG017013	1711.7	1.10879	0.222566	4.98183	6.3e-07	6.07e-06
CCG017023	3866.79	1.76228	0.140246	12.5656	3.26e-36	2.12e-34
CCG017027	75.0254	1.46346	0.466261	3.13871	0.00169694	0.00855357
CCG017034	175.084	-1.35708	0.295984	-4.58496	4.54e-06	3.86e-05
CCG017039	2288.14	2.65327	0.213779	12.4113	2.27e-35	1.42e-33
CCG017040	463.622	-1.41314	0.233768	-6.04505	1.49e-09	2e-08
CCG017042	402.563	1.53411	0.226384	6.77656	1.23e-11	1.98e-10
CCG017043	230.501	1.09254	0.289529	3.7735	0.000160971	0.00104297
CCG017057	21.4975	3.59379	1.07985	3.32806	0.000874535	0.00474397
CCG017200	344.921	1.07999	0.287821	3.75228	0.000175234	0.00112803
CCG017296	862.122	3.59813	0.248669	14.4695	1.89e-47	1.79e-45
CCG017336	682.461	-1.51329	0.190755	-7.93314	2.14e-15	4.71e-14
CCG017341	113.103	1.09032	0.324136	3.36376	0.000768884	0.00424352
CCG017399	17.4597	3.87419	1.10835	3.49546	0.000473245	0.00276991
CCG017406	4538.47	1.60759	0.120664	13.3229	1.7e-40	1.31e-38
CCG017413	54.9285	4.67364	0.679661	6.87643	6.14e-12	1.02e-10
CCG017472	132.642	-1.03991	0.311555	-3.3378	0.000844432	0.00460123
CCG017482	7944.69	2.94313	0.129201	22.7795	7.32e-115	4.21e-112
CCG017485	846.629	1.37673	0.297376	4.6296	3.66e-06	3.15e-05
CCG017486	50.0981	5.42161	0.796014	6.81095	9.7e-12	1.58e-10
CCG017487	891.279	3.60753	0.193352	18.6578	1.09e-77	2.49e-75
CCG017493	1440.45	5.00812	0.178465	28.0622	2.84e-173	7.75e-170
CCG017495	38.9041	5.37253	0.891542	6.02611	1.68e-09	2.24e-08
CCG017531	960.001	1.40453	0.189117	7.42674	1.11e-13	2.14e-12
CCG017539	450.476	-1.27369	0.305331	-4.17152	3.03e-05	0.000223765
CCG017548	18.0674	4.65831	1.11865	4.16422	3.12e-05	0.000230191
CCG017550	19.2419	4.76566	1.11747	4.26467	2e-05	0.000154322
CCG017552	878.751	-1.85641	0.274138	-6.77182	1.27e-11	2.05e-10
CCG017555	2698.48	1.67138	0.480506	3.47838	0.000504455	0.00292828
CCG017562	480.325	1.77154	0.276218	6.41357	1.42e-10	2.1e-09
CCG017571	2995.07	-1.68923	0.167869	-10.0628	8.07e-24	2.94e-22
CCG017575	1511.83	1.63374	0.159729	10.2283	1.48e-24	5.65e-23
CCG017576	601.28	1.66816	0.182679	9.13166	6.75e-20	1.98e-18
CCG017597	6357.54	-1.39345	0.107917	-12.9123	3.84e-38	2.67e-36
CCG017604	1262.39	2.1763	0.184204	11.8146	3.28e-32	1.8e-30
CCG017605	2870.62	2.07421	0.124639	16.6417	3.48e-62	5.35e-60
CCG017617	114.252	-1.99176	0.388023	-5.13311	2.85e-07	2.89e-06
CCG017633	201.143	2.05856	0.263075	7.825	5.08e-15	1.08e-13
CCG017649	451.301	1.02396	0.189759	5.3961	6.81e-08	7.48e-07
CCG017656	15053.4	1.43639	0.116258	12.3552	4.57e-35	2.82e-33
CCG017677	198.871	1.34158	0.285792	4.69424	2.68e-06	2.35e-05
CCG017680	10406.1	3.10374	0.638604	4.8602	1.17e-06	1.09e-05
CCG017687	114.498	3.48617	0.392751	8.87627	6.91e-19	1.89e-17
CCG017690	2444.83	1.15807	0.118517	9.77131	1.5e-22	5.17e-21
CCG017691	271.212	1.13367	0.233011	4.86529	1.14e-06	1.06e-05
CCG017708	1448.57	-1.99861	0.159726	-12.5128	6.36e-36	4.05e-34
CCG017712	58.3561	4.21957	0.589749	7.15485	8.38e-13	1.49e-11
CCG017727	1106.86	1.96841	0.151495	12.9932	1.34e-38	9.46e-37
CCG017733	1779.33	1.14205	0.16331	6.99311	2.69e-12	4.61e-11
CCG017738	226.145	5.55309	1.28377	4.32561	1.52e-05	0.000119315
CCG017747	221.482	1.33612	0.32386	4.1256	3.7e-05	0.000269096
CCG017748	5112.56	3.72466	0.142709	26.0997	3.68e-150	4.46e-147
CCG017764	100.617	1.59701	0.350882	4.5514	5.33e-06	4.49e-05
CCG017880	1437.76	2.04226	0.218766	9.33536	1.01e-20	3.11e-19
CCG017882	29.3132	4.35794	0.853267	5.10735	3.27e-07	3.29e-06
CCG017883	19457.3	3.14291	0.118554	26.5104	7.36e-155	1.15e-151
CCG017904	1790.95	-1.35891	0.274817	-4.94478	7.62e-07	7.27e-06
CCG017906	1270.62	-1.50071	0.14187	-10.5781	3.77e-26	1.54e-24
CCG017912	6522.67	-1.6607	0.155861	-10.655	1.65e-26	6.84e-25
CCG017920	3204.74	2.04379	0.178664	11.4393	2.66e-30	1.33e-28
CCG017921	362.667	-2.09433	0.208498	-10.0448	9.68e-24	3.53e-22
CCG017943	762.576	-1.58599	0.165551	-9.5801	9.69e-22	3.19e-20
CCG017945	259.736	-1.00419	0.285948	-3.51179	0.000445097	0.00262483
CCG017950	282.527	-1.4481	0.251038	-5.76844	8e-09	9.83e-08
CCG017952	26.1341	2.84975	0.708256	4.02361	5.73e-05	0.000403643
CCG017963	642.454	-2.83331	0.187975	-15.0728	2.45e-51	2.66e-49
CCG017968	111.375	1.2583	0.353711	3.55742	0.000374522	0.00224991
CCG018005	620.316	-1.00085	0.225539	-4.43759	9.1e-06	7.37e-05
CCG018034	456.294	1.32735	0.208053	6.37987	1.77e-10	2.58e-09
CCG018064	740.541	-1.13232	0.1717	-6.59474	4.26e-11	6.6e-10
CCG018070	74.6277	2.50528	0.420566	5.95694	2.57e-09	3.37e-08
CCG018160	109.937	3.01475	0.398315	7.56877	3.77e-14	7.48e-13
CCG018180	1014.93	2.34259	0.21767	10.7621	5.2e-27	2.21e-25
CCG018243	223.429	2.32376	0.25998	8.93822	3.96e-19	1.1e-17
CCG018245	44.5645	-3.52951	0.626797	-5.63103	1.79e-08	2.11e-07
CCG018257	1369.92	3.32367	0.242392	13.712	8.61e-43	7.29e-41
CCG018260	788.938	4.42462	0.299924	14.7525	2.97e-49	3.04e-47
CCG018261	1004.68	1.68774	0.189433	8.90938	5.13e-19	1.41e-17
CCG018266	768.625	1.67268	0.179552	9.31589	1.21e-20	3.72e-19
CCG018285	39.3344	2.06487	0.622589	3.31659	0.000911234	0.00491864
CCG018288	1018.13	-1.01544	0.184662	-5.49893	3.82e-08	4.32e-07
CCG018295	14296.1	-1.68487	0.132725	-12.6945	6.34e-37	4.25e-35
CCG018302	215.445	-2.42877	0.475678	-5.10591	3.29e-07	3.31e-06
CCG018307	58.8643	2.75008	0.541245	5.08102	3.75e-07	3.75e-06
CCG018308	1562.06	2.00894	0.134374	14.9504	1.55e-50	1.64e-48
CCG018319	151.184	2.61471	0.378701	6.90442	5.04e-12	8.45e-11
CCG018332	112.512	4.48587	0.460343	9.74462	1.95e-22	6.66e-21
CCG018337	26.6374	-3.5417	1.0856	-3.26244	0.00110456	0.0058467
CCG018348	146.969	4.45009	0.42538	10.4614	1.3e-25	5.17e-24
CCG018351	43.0935	-1.9809	0.591392	-3.34956	0.000809403	0.00444024
CCG018484	338.972	1.46281	0.226088	6.47007	9.8e-11	1.47e-09
CCG018485	161.178	1.58967	0.323548	4.91325	8.96e-07	8.43e-06
CCG018488	234.842	-1.20852	0.306806	-3.93905	8.18e-05	0.00055782
CCG018491	1507.79	1.49137	0.168419	8.85511	8.36e-19	2.27e-17
CCG018496	114.942	-1.15325	0.322117	-3.58021	0.000343321	0.00207962
CCG018498	144.652	1.5062	0.302213	4.9839	6.23e-07	6.01e-06
CCG018508	96.4238	-1.47842	0.420172	-3.5186	0.000433831	0.00256463
CCG018538	257.117	6.21172	0.435909	14.25	4.48e-46	4.12e-44
CCG018543	48.361	4.66121	0.713488	6.53299	6.45e-11	9.81e-10
CCG018544	3280.42	5.35054	0.258398	20.7066	3.02e-95	1.12e-92
CCG018559	85.3506	2.40546	0.60817	3.95525	7.65e-05	0.000526259
CCG018565	117.487	-1.43275	0.403761	-3.54852	0.000387404	0.00232028
CCG018575	433.448	-1.00793	0.191144	-5.27315	1.34e-07	1.42e-06
CCG018587	1166.24	-1.56004	0.245911	-6.34391	2.24e-10	3.23e-09
CCG018612	12361.6	1.12955	0.106172	10.6389	1.96e-26	8.1e-25
CCG018613	5103.76	1.14898	0.117854	9.74921	1.86e-22	6.38e-21
CCG018754	192.419	1.03479	0.29337	3.52724	0.000419909	0.00248838
CCG018765	1209.67	3.27713	1.04522	3.13536	0.00171644	0.00864387
CCG018821	515.983	1.92193	0.211435	9.08991	9.91e-20	2.86e-18
CCG018955	213.677	1.03456	0.243336	4.25156	2.12e-05	0.000162951
CCG018979	801.083	2.58339	0.169541	15.2375	1.99e-52	2.22e-50
CCG018980	469.037	5.01271	0.266613	18.8015	7.35e-79	1.75e-76
CCG018981	203.647	4.7943	0.357822	13.3985	6.17e-41	4.83e-39
CCG018982	108.249	2.029	0.36167	5.61008	2.02e-08	2.37e-07
CCG018987	39.764	-2.63311	0.655552	-4.01663	5.9e-05	0.000414686
CCG018988	231.716	-1.07229	0.26497	-4.04682	5.19e-05	0.000368741
CCG018991	41.406	7.49296	1.51578	4.94332	7.68e-07	7.32e-06
CCG019010	96.5459	1.50897	0.353915	4.26364	2.01e-05	0.000154867
CCG019029	1142.56	1.85275	0.196187	9.44382	3.59e-21	1.14e-19
CCG019038	1051.52	1.02818	0.147684	6.96204	3.35e-12	5.7e-11
CCG019041	42.2119	2.23216	0.622734	3.58445	0.000337792	0.00204887
CCG019047	668.668	1.1775	0.180866	6.51036	7.5e-11	1.13e-09
CCG019056	1212.6	-1.81742	0.179585	-10.1201	4.5e-24	1.67e-22
CCG019059	142.086	1.47735	0.311021	4.74999	2.03e-06	1.81e-05
CCG019063	71.0302	1.59968	0.417311	3.83329	0.000126439	0.000834314
CCG019102	120.16	1.48423	0.357569	4.15088	3.31e-05	0.000243125
CCG019217	2810.78	-2.13521	0.214006	-9.97735	1.92e-23	6.91e-22
CCG019230	453.391	1.45732	0.203057	7.17688	7.13e-13	1.28e-11
CCG019247	5323.77	-1.00609	0.108332	-9.28705	1.59e-20	4.84e-19
CCG019253	3446.13	-1.11002	0.129603	-8.56476	1.08e-17	2.74e-16
CCG019272	714.163	2.52401	0.23485	10.7473	6.1e-27	2.58e-25
CCG019286	317.702	1.53491	0.211871	7.24452	4.34e-13	7.95e-12
CCG019297	219.512	-2.68051	0.31116	-8.61458	7.02e-18	1.8e-16
CCG019329	65.7593	-2.11354	0.444343	-4.75654	1.97e-06	1.76e-05
CCG019330	64.4758	3.00253	0.525401	5.71474	1.1e-08	1.33e-07
CCG019397	10708.5	1.76199	0.153158	11.5044	1.25e-30	6.39e-29
CCG019398	9833.83	1.54956	0.134987	11.4794	1.68e-30	8.5e-29
CCG019399	32838.1	2.60142	0.129635	20.0673	1.43e-89	4.79e-87
CCG019400	13601.7	2.58415	0.168869	15.3027	7.33e-53	8.3e-51
CCG019401	897.319	2.66063	0.17061	15.5948	7.9e-55	9.64e-53
CCG019407	270.802	-2.04547	0.261307	-7.82785	4.96e-15	1.06e-13
CCG019423	1713.51	1.27168	0.137514	9.24763	2.3e-20	6.92e-19
CCG019425	17.8818	5.23706	1.29476	4.04481	5.24e-05	0.000371434
CCG019428	3904.14	2.45289	0.135463	18.1075	2.78e-73	5.68e-71
CCG019431	938.114	1.37233	0.147324	9.31506	1.22e-20	3.74e-19
CCG019455	394.155	2.01843	0.208518	9.67989	3.67e-22	1.24e-20
CCG019457	31.4121	2.91985	0.661039	4.41705	1e-05	8.08e-05
CCG019459	199.806	-2.21239	0.389375	-5.68191	1.33e-08	1.59e-07
CCG019496	420.979	2.83553	0.218337	12.9869	1.45e-38	1.02e-36
CCG019587	1924.6	1.84913	0.137448	13.4533	2.94e-41	2.35e-39
CCG019589	105.552	2.8548	0.465922	6.1272	8.94e-10	1.22e-08
CCG019601	1971.05	2.10765	0.131564	16.02	9.26e-58	1.26e-55
CCG019612	192.201	2.01125	0.271408	7.41043	1.26e-13	2.41e-12
CCG019619	1898.35	1.22526	0.231084	5.30224	1.14e-07	1.23e-06
CCG019638	11474.2	1.22155	0.109117	11.1949	4.32e-29	2.05e-27
CCG019644	5530.67	1.50393	0.115318	13.0416	7.1e-39	5.1e-37
CCG019645	701.89	-1.01315	0.232238	-4.36256	1.29e-05	0.000101929
CCG019646	2154.17	1.38452	0.168219	8.23043	1.87e-16	4.38e-15
CCG019663	40.285	6.44057	1.15798	5.56192	2.67e-08	3.07e-07
CCG019679	3142.57	1.6094	0.140362	11.4661	1.95e-30	9.88e-29
CCG019680	651.865	1.41165	0.171027	8.254	1.53e-16	3.62e-15
CCG019681	718.771	2.36891	0.197046	12.0221	2.72e-33	1.56e-31
CCG019682	231.163	3.34249	0.30207	11.0653	1.85e-28	8.55e-27
CCG019701	206.451	2.99092	0.358923	8.33303	7.88e-17	1.9e-15
CCG019703	1410.65	-1.3532	0.132254	-10.2319	1.43e-24	5.45e-23
CCG019706	10749.8	-1.63937	0.103557	-15.8305	1.92e-56	2.52e-54
CCG019721	4176.23	1.97042	0.151128	13.038	7.43e-39	5.31e-37
CCG019766	71.8831	1.70721	0.472753	3.61121	0.000304771	0.00186418
CCG019777	1932.48	1.82848	0.145341	12.5806	2.7e-36	1.77e-34
CCG019778	127.041	1.66698	0.326062	5.11246	3.18e-07	3.2e-06
CCG019781	9333.18	1.41656	0.113983	12.4278	1.85e-35	1.16e-33
CCG019784	3365.54	-1.02163	0.21992	-4.64548	3.39e-06	2.93e-05
CCG019786	10730.2	1.01855	0.11189	9.10311	8.78e-20	2.55e-18
CCG019811	29.4027	4.62753	0.875148	5.28771	1.24e-07	1.32e-06
CCG019812	1196.09	1.50776	0.15747	9.57489	1.02e-21	3.35e-20
CCG019817	91.9454	1.94388	0.36705	5.29596	1.18e-07	1.26e-06
CCG019820	4406.22	-1.08023	0.149645	-7.21862	5.25e-13	9.58e-12
CCG019826	957.975	2.8546	0.170208	16.7712	3.96e-63	6.15e-61
CCG019846	22.3421	4.9879	1.09638	4.54943	5.38e-06	4.53e-05
CCG019849	2172.71	1.65089	0.152912	10.7963	3.58e-27	1.53e-25
CCG019875	290.209	1.41393	0.22927	6.16708	6.96e-10	9.59e-09
CCG019881	321.404	1.30906	0.231039	5.66598	1.46e-08	1.74e-07
CCG019893	10059.7	1.132	0.126873	8.92228	4.57e-19	1.27e-17
CCG019939	670.303	1.38264	0.23494	5.8851	3.98e-09	5.07e-08
CCG019990	1525.67	-1.57655	0.237082	-6.6498	2.93e-11	4.59e-10
CCG020001	3016.56	1.08019	0.124465	8.67864	4.01e-18	1.04e-16
CCG020005	5137.29	2.23591	0.136102	16.4281	1.2e-60	1.79e-58
CCG020011	376.211	-1.15125	0.300177	-3.83524	0.000125443	0.000827992
CCG020019	226.216	1.20092	0.24355	4.93088	8.19e-07	7.75e-06
CCG020020	2594.86	1.39464	0.13264	10.5145	7.41e-26	2.97e-24
CCG020037	201.897	2.58264	0.31028	8.32359	8.53e-17	2.05e-15
CCG020044	1695.11	-1.70816	0.244888	-6.97527	3.05e-12	5.21e-11
CCG020046	1047.66	-1.33115	0.147951	-8.99724	2.31e-19	6.55e-18
CCG020069	40.7187	1.73798	0.53539	3.2462	0.00116956	0.00615497
CCG020070	24.9231	2.444	0.725893	3.36689	0.000760217	0.00420311
CCG020072	79.8151	1.7011	0.430431	3.95208	7.75e-05	0.000532596
CCG020074	8197.57	1.68214	0.118803	14.1591	1.64e-45	1.48e-43
CCG020075	1789.66	-1.12254	0.150679	-7.4499	9.34e-14	1.8e-12
CCG020198	647.303	-1.19264	0.173943	-6.8565	7.06e-12	1.17e-10
CCG020204	366.594	-1.57721	0.201595	-7.82367	5.13e-15	1.09e-13
CCG020220	104.626	1.66721	0.375384	4.44135	8.94e-06	7.25e-05
CCG020224	205.074	1.39809	0.25478	5.48745	4.08e-08	4.59e-07
CCG020243	8227.34	2.28618	0.138431	16.5149	2.87e-61	4.32e-59
CCG020248	93.2691	-1.66908	0.396978	-4.20447	2.62e-05	0.00019579
CCG020249	8998.35	-1.14738	0.129715	-8.8454	9.12e-19	2.46e-17
CCG020256	342.885	-1.97909	0.283408	-6.9832	2.89e-12	4.93e-11
CCG020257	1499.21	3.14797	0.187435	16.795	2.66e-63	4.15e-61
CCG020259	61.2905	-3.01555	0.53798	-5.60532	2.08e-08	2.43e-07
CCG020274	290.649	1.98526	0.260713	7.61473	2.64e-14	5.31e-13
CCG020304	5929.88	-1.09152	0.110193	-9.90553	3.94e-23	1.39e-21
CCG020310	147.177	-1.01106	0.315867	-3.2009	0.00136999	0.00707519
CCG020322	552.846	1.85622	0.196174	9.46214	3.02e-21	9.64e-20
CCG020350	50.0159	2.16158	0.490976	4.40262	1.07e-05	8.59e-05
CCG020383	544.979	1.88836	0.201049	9.39256	5.86e-21	1.84e-19
CCG020388	485.11	-1.17598	0.205179	-5.73151	9.95e-09	1.21e-07
CCG020398	1893.71	1.0275	0.151191	6.79603	1.08e-11	1.75e-10
CCG020405	97.4034	2.7643	0.491574	5.62337	1.87e-08	2.2e-07
CCG020424	1898.19	-1.06679	0.269691	-3.95559	7.63e-05	0.000525673
CCG020431	295.118	2.09297	0.243764	8.58605	9e-18	2.29e-16
CCG020438	4059.67	1.01699	0.12264	8.29245	1.11e-16	2.64e-15
CCG020455	18701.3	1.05104	0.110753	9.48994	2.31e-21	7.45e-20
CCG020478	2006.44	-1.5639	0.128645	-12.1566	5.29e-34	3.14e-32
CCG020490	1337.74	-1.40671	0.136747	-10.2869	8.07e-25	3.11e-23
CCG020495	5308.86	2.6554	0.144358	18.3946	1.45e-75	3.14e-73
CCG020504	229.459	3.23782	0.317239	10.2063	1.86e-24	7.02e-23
CCG020506	38.5874	3.24282	0.656017	4.94319	7.69e-07	7.32e-06
CCG020508	50.5947	1.70425	0.476627	3.57565	0.000349355	0.00211265
CCG020509	166.339	3.15582	0.363079	8.69185	3.57e-18	9.27e-17
CCG020511	335.042	6.3829	0.895028	7.13151	9.93e-13	1.76e-11
CCG020513	1134.95	1.82035	0.155685	11.6925	1.39e-31	7.41e-30
CCG020514	1738.71	-1.00733	0.143403	-7.02451	2.15e-12	3.72e-11
CCG020647	411.689	2.35435	0.254297	9.25828	2.08e-20	6.29e-19
CCG020659	3299.22	1.68722	0.144789	11.653	2.22e-31	1.16e-29
CCG020660	588.351	1.87773	0.272156	6.89947	5.22e-12	8.73e-11
CCG020665	418.205	1.68453	0.218979	7.69266	1.44e-14	2.97e-13
CCG020685	668.849	1.64964	0.222974	7.39833	1.38e-13	2.63e-12
CCG020710	2979.44	-1.23355	0.132148	-9.33466	1.01e-20	3.12e-19
CCG020722	93.0999	-1.34582	0.398076	-3.3808	0.00072274	0.00402023
CCG020723	178.716	1.58337	0.292441	5.41432	6.15e-08	6.79e-07
CCG020870	1718.84	1.44428	0.139245	10.3722	3.32e-25	1.31e-23
CCG020877	658.808	1.17745	0.174525	6.74658	1.51e-11	2.42e-10
CCG020878	9377.81	1.53024	0.175424	8.7231	2.71e-18	7.1e-17
CCG020890	143.342	3.80456	0.57886	6.5725	4.95e-11	7.63e-10
CCG020891	1668.32	2.66609	0.167566	15.9107	5.34e-57	7.08e-55
CCG020908	33.364	2.95175	0.713399	4.13759	3.51e-05	0.000256698
CCG020917	62.6117	-1.59058	0.470888	-3.37783	0.000730612	0.00405833
CCG020921	3366.37	-1.00526	0.114975	-8.74331	2.26e-18	5.96e-17
CCG020926	3572.32	1.14443	0.148162	7.72419	1.13e-14	2.33e-13
CCG020949	212.767	-1.14424	0.2599	-4.40262	1.07e-05	8.59e-05
CCG020955	1002.81	1.04189	0.145959	7.13823	9.45e-13	1.68e-11
CCG020965	70.955	2.57144	0.446187	5.76314	8.26e-09	1.01e-07
CCG020966	35.7232	2.17499	0.649863	3.34685	0.000817368	0.00447607
CCG020971	2089.72	3.19268	0.129825	24.5922	1.53e-133	1.29e-130
CCG020988	96.806	4.68201	0.503067	9.30692	1.32e-20	4.03e-19
CCG020989	1796.95	-1.02769	0.141502	-7.26273	3.79e-13	7.01e-12
CCG020996	5623.75	2.47886	0.112401	22.0536	8.82e-108	4.48e-105
CCG021033	277.715	1.19429	0.221245	5.39806	6.74e-08	7.41e-07
CCG021125	64.8766	1.50957	0.417505	3.6157	0.000299535	0.00183781
CCG021135	9814.09	1.2855	0.104954	12.2482	1.72e-34	1.04e-32
CCG021145	360.169	1.23763	0.221663	5.58339	2.36e-08	2.74e-07
CCG021166	68.7196	4.35067	0.559012	7.78277	7.1e-15	1.49e-13
CCG021168	2258.11	-2.32378	0.527373	-4.40634	1.05e-05	8.45e-05
CCG021170	5242.25	2.43453	0.138894	17.528	8.77e-69	1.6e-66
CCG021175	1399.73	1.56976	0.163537	9.5988	8.09e-22	2.68e-20
CCG021188	2386.89	2.34931	0.126479	18.5747	5.15e-77	1.14e-74
CCG021196	30.5125	8.5046	1.56573	5.43172	5.58e-08	6.19e-07
CCG021246	8357.96	2.65529	0.236122	11.2454	2.44e-29	1.17e-27
CCG021262	126.27	-1.6935	0.348045	-4.86575	1.14e-06	1.06e-05
CCG021263	151.002	-2.36821	0.33313	-7.10898	1.17e-12	2.06e-11
CCG021314	225.503	-1.21601	0.271913	-4.47204	7.75e-06	6.37e-05
CCG021315	1125.93	-1.07734	0.163296	-6.59749	4.18e-11	6.49e-10
CCG021323	136.666	2.9241	0.417048	7.01143	2.36e-12	4.06e-11
CCG021327	599.618	1.01948	0.182817	5.57647	2.45e-08	2.84e-07
CCG021350	2140.05	4.99647	0.207769	24.0482	8.72e-128	6.81e-125
CCG021358	119.556	1.89619	0.42433	4.46865	7.87e-06	6.46e-05
CCG021381	84.0694	1.66968	0.377282	4.42554	9.62e-06	7.78e-05
CCG021389	180.116	-3.1285	0.517037	-6.05082	1.44e-09	1.94e-08
CCG021391	614.628	1.33918	0.177525	7.54361	4.57e-14	9.01e-13
CCG021395	2579.27	2.31437	0.229219	10.0967	5.71e-24	2.1e-22
CCG021397	2401.24	1.53641	0.241445	6.36337	1.97e-10	2.85e-09
CCG021399	560.213	2.66378	0.188872	14.1036	3.61e-45	3.19e-43
CCG021400	144.54	2.81915	0.339065	8.31448	9.22e-17	2.21e-15
CCG021402	228.417	2.45708	0.312369	7.86598	3.66e-15	7.86e-14
CCG021404	286.802	2.85939	0.256492	11.1481	7.32e-29	3.45e-27
CCG021412	50.118	-2.54088	0.52025	-4.88396	1.04e-06	9.7e-06
CCG021415	54.1593	3.51654	0.546444	6.43531	1.23e-10	1.83e-09
CCG021440	57.4807	-2.51635	0.68736	-3.66089	0.000251343	0.0015672
CCG021470	102.985	2.13458	0.386415	5.52406	3.31e-08	3.77e-07
CCG021493	404.941	1.23027	0.213679	5.75756	8.53e-09	1.05e-07
CCG021630	2962.05	1.51605	0.16711	9.07216	1.17e-19	3.35e-18
CCG021637	181.135	3.20018	0.298655	10.7153	8.63e-27	3.61e-25
CCG021644	690.125	1.61628	0.308725	5.23535	1.65e-07	1.73e-06
CCG021646	420.515	1.4049	0.254952	5.51044	3.58e-08	4.06e-07
CCG021678	1890.79	-2.92655	0.229571	-12.7479	3.2e-37	2.16e-35
CCG021681	16.2737	7.59728	1.66841	4.55362	5.27e-06	4.45e-05
CCG021684	2052.4	-1.25973	0.160403	-7.85352	4.05e-15	8.65e-14
CCG021699	34.0309	-2.19586	0.693443	-3.16661	0.00154225	0.00785902
CCG021822	215.843	2.52227	0.263771	9.56236	1.15e-21	3.76e-20
CCG021825	258.799	3.02841	0.26203	11.5575	6.76e-31	3.5e-29
CCG021856	2626.77	1.06332	0.13532	7.8578	3.91e-15	8.38e-14
CCG021888	276.565	-3.20359	0.254376	-12.5939	2.28e-36	1.5e-34
CCG021901	1318.43	-1.07941	0.214252	-5.03805	4.7e-07	4.63e-06
CCG021953	788.38	1.35552	0.197224	6.87301	6.29e-12	1.05e-10
CCG022010	903.704	1.7497	0.168665	10.3738	3.26e-25	1.29e-23
CCG022022	9766.82	1.45825	0.200646	7.26778	3.65e-13	6.76e-12
CCG022025	143.823	1.85884	0.383815	4.84305	1.28e-06	1.18e-05
CCG022037	3673.29	1.19505	0.168575	7.08914	1.35e-12	2.37e-11
CCG022042	206.189	-1.0065	0.289512	-3.47653	0.000507952	0.00294466
CCG022154	40.5588	3.2567	0.689438	4.72369	2.32e-06	2.06e-05
CCG022168	272.497	3.15555	0.267988	11.775	5.25e-32	2.86e-30
CCG022169	698.059	3.29895	0.182213	18.105	2.91e-73	5.9e-71
CCG022212	520.324	1.46131	0.179001	8.16374	3.25e-16	7.49e-15
CCG022219	316.322	-1.08754	0.304473	-3.57187	0.000354441	0.00213986
CCG022220	415.884	-1.60523	0.289565	-5.54359	2.96e-08	3.4e-07
CCG022221	4440.6	-1.2346	0.262252	-4.70769	2.51e-06	2.21e-05
CCG022223	2493.3	1.20057	0.150423	7.9813	1.45e-15	3.23e-14
CCG022243	224.464	1.12024	0.25198	4.44573	8.76e-06	7.11e-05
CCG022246	2169.48	2.00939	0.138539	14.5042	1.14e-47	1.1e-45
CCG022340	5711.34	1.36857	0.12707	10.7702	4.76e-27	2.03e-25
CCG022343	224.28	1.1925	0.26893	4.43423	9.24e-06	7.48e-05
CCG022344	73.6567	2.09531	0.414297	5.05751	4.25e-07	4.21e-06
CCG022371	38.3877	2.13685	0.578312	3.69497	0.00021991	0.00138944
CCG022379	3417.99	2.31735	0.167885	13.8032	2.44e-43	2.08e-41
CCG022385	16.908	4.09372	1.21391	3.37234	0.000745335	0.00413128
CCG022386	10923.2	2.75853	0.171621	16.0733	3.92e-58	5.39e-56
CCG022398	9331.47	1.06426	0.113533	9.37408	6.98e-21	2.18e-19
CCG022399	768.765	-1.21994	0.153485	-7.94828	1.89e-15	4.19e-14
CCG022409	1001.34	2.08274	0.164984	12.6238	1.56e-36	1.03e-34
CCG022444	1346.11	1.36409	0.194971	6.99639	2.63e-12	4.51e-11
CCG022538	165.912	1.83176	0.350917	5.21991	1.79e-07	1.87e-06
CCG022539	1656.29	2.28396	0.153328	14.8959	3.5e-50	3.66e-48
CCG022541	355.996	2.6968	0.228752	11.7892	4.44e-32	2.43e-30
CCG022542	4587.59	3.0922	0.126387	24.466	3.4e-132	2.75e-129
CCG022560	231.814	3.29556	0.350377	9.40578	5.16e-21	1.63e-19
CCG022561	226.148	4.13459	0.371433	11.1314	8.82e-29	4.14e-27
CCG022562	183.257	4.10766	0.340595	12.0602	1.71e-33	9.91e-32
CCG022563	23.4724	8.12716	1.59776	5.08658	3.65e-07	3.65e-06
CCG022568	687.079	2.89351	0.197941	14.6181	2.15e-48	2.14e-46
CCG022569	2774.81	3.90655	0.154528	25.2805	5.24e-141	5.45e-138
CCG022572	539.537	2.73078	0.193299	14.1273	2.58e-45	2.29e-43
CCG022576	250.565	-1.59359	0.269544	-5.91217	3.38e-09	4.35e-08
CCG022610	46.7898	1.87416	0.52318	3.58225	0.000340643	0.00206454
CCG022630	228.791	1.18409	0.260061	4.55314	5.28e-06	4.45e-05
CCG022631	32662	1.68226	0.115476	14.5681	4.48e-48	4.35e-46
CCG022634	2516.82	-1.71253	0.173035	-9.89698	4.29e-23	1.51e-21
CCG022635	1293.13	-1.67244	0.196263	-8.52144	1.58e-17	3.95e-16
CCG022640	63.1527	1.348	0.42012	3.20861	0.00133379	0.00691605
CCG022654	414.571	-1.18784	0.190501	-6.23533	4.51e-10	6.34e-09
CCG022664	31.2091	2.16098	0.612366	3.5289	0.000417294	0.00247423
CCG022668	169.78	4.66658	0.407053	11.4643	1.99e-30	1e-28
CCG022689	172.837	5.73485	0.490983	11.6803	1.61e-31	8.5e-30
CCG022691	23.384	5.03014	1.11101	4.52752	5.97e-06	4.99e-05
CCG022698	474.608	-1.44245	0.334288	-4.315	1.6e-05	0.000124933
CCG022738	6416.83	-1.18005	0.207717	-5.68103	1.34e-08	1.6e-07
CCG022743	210.805	-1.52032	0.33007	-4.60607	4.1e-06	3.51e-05
CCG022748	4474.64	1.28825	0.222705	5.78456	7.27e-09	8.98e-08
CCG022752	32.9566	3.30434	0.889838	3.71342	0.000204476	0.00130019
CCG022791	7.03808	6.39055	1.92978	3.31154	0.000927823	0.00498725
CCG022798	175.608	1.75252	0.323021	5.4254	5.78e-08	6.4e-07
CCG022805	119.667	1.14298	0.323809	3.52979	0.000415885	0.00246654
CCG022839	547.848	1.92717	0.180433	10.6808	1.25e-26	5.21e-25
CCG022854	2002.13	2.67871	0.13946	19.2078	3.19e-82	8.1e-80
CCG022874	127.15	2.00357	0.392268	5.10765	3.26e-07	3.28e-06
CCG022911	487.789	2.72009	0.282505	9.62846	6.06e-22	2.03e-20
CCG022928	57.898	2.74213	0.477432	5.7435	9.27e-09	1.13e-07
CCG022957	7613.81	1.041	0.121903	8.53955	1.35e-17	3.39e-16
CCG022975	136.818	1.78864	0.303558	5.89224	3.81e-09	4.88e-08
CCG022991	490.443	-1.13145	0.196373	-5.76174	8.33e-09	1.02e-07
CCG022992	183.206	1.50691	0.336647	4.47623	7.6e-06	6.25e-05
CCG023083	318.765	1.15403	0.210671	5.4779	4.3e-08	4.84e-07
CCG023099	2348.37	1.56371	0.202218	7.73277	1.05e-14	2.19e-13
CCG023127	747.752	-1.47119	0.160781	-9.15022	5.68e-20	1.68e-18
CCG023133	722.907	5.86328	1.02397	5.72605	1.03e-08	1.25e-07
CCG023203	184.8	3.83258	0.3242	11.8216	3.02e-32	1.66e-30
CCG023204	62.0638	2.25155	0.456517	4.93202	8.14e-07	7.71e-06
CCG023208	600.73	5.41979	0.280189	19.3433	2.32e-83	6.11e-81
CCG023210	35.6244	2.41437	0.64473	3.74478	0.000180554	0.00115988
CCG023238	2923.65	3.29857	0.164027	20.11	6.04e-90	2.06e-87
CCG023252	34367.3	1.44783	0.115195	12.5685	3.15e-36	2.05e-34
CCG023277	2606.07	-2.7438	0.650363	-4.21887	2.46e-05	0.000185088
CCG023390	78.6767	-2.03076	0.435952	-4.65823	3.19e-06	2.77e-05
CCG023401	159.91	1.24597	0.273622	4.55362	5.27e-06	4.45e-05
CCG023405	3594.65	-1.68183	0.124861	-13.4697	2.36e-41	1.9e-39
CCG023406	230.188	-1.08593	0.25102	-4.32607	1.52e-05	0.000119151
CCG023408	7722.23	2.17802	0.141537	15.3883	1.96e-53	2.27e-51
CCG023409	12245.2	1.71705	0.142052	12.0875	1.23e-33	7.15e-32
CCG023415	235.532	1.59131	0.265378	5.99639	2.02e-09	2.67e-08
CCG023417	48.3852	2.13019	0.553854	3.84611	0.000120006	0.00079547
CCG023443	40.7862	4.61956	0.737628	6.26271	3.78e-10	5.35e-09
CCG023459	1665.65	4.10977	0.264652	15.529	2.21e-54	2.64e-52
CCG023462	3655.98	-2.07728	0.154173	-13.4737	2.23e-41	1.8e-39
CCG023474	7692.69	-1.75419	0.23467	-7.47515	7.71e-14	1.49e-12
CCG023477	20.0219	2.9666	0.817537	3.6287	0.000284849	0.00175608
CCG023482	3604.77	1.25453	0.113616	11.0419	2.4e-28	1.1e-26
CCG023484	609.774	-1.17813	0.225758	-5.21855	1.8e-07	1.88e-06
CCG023494	417.563	2.25866	0.290971	7.7625	8.33e-15	1.74e-13
CCG023508	4876.14	-1.59968	0.121584	-13.157	1.55e-39	1.15e-37
CCG023516	1219.34	-1.3489	0.144206	-9.35402	8.44e-21	2.62e-19
CCG023526	6721.31	2.27684	0.147478	15.4385	9.01e-54	1.06e-51
CCG023527	420.271	1.93077	0.205943	9.3753	6.9e-21	2.15e-19
CCG023647	7645.65	1.66741	0.177116	9.41422	4.77e-21	1.51e-19
CCG023657	11404.4	2.15056	0.110752	19.4178	5.46e-84	1.53e-81
CCG023689	372.207	-1.26834	0.215287	-5.89137	3.83e-09	4.9e-08
CCG023691	3266.43	-1.53357	0.130353	-11.7648	5.93e-32	3.2e-30
CCG023692	298.841	1.64389	0.240228	6.84304	7.75e-12	1.28e-10
CCG023717	8605.33	2.46767	0.164471	15.0037	6.95e-51	7.41e-49
CCG023718	511.986	2.28107	0.240478	9.48559	2.41e-21	7.76e-20
CCG023727	1730.2	1.35228	0.1384	9.77079	1.5e-22	5.19e-21
CCG023761	4875.5	1.18696	0.125032	9.49323	2.24e-21	7.24e-20
CCG023767	87.6142	5.55508	0.620029	8.95938	3.27e-19	9.17e-18
CCG023774	1919.51	-1.14304	0.156614	-7.29843	2.91e-13	5.43e-12
CCG023783	227.026	-2.39806	0.405497	-5.91389	3.34e-09	4.31e-08
CCG023786	1031.03	3.04324	0.161919	18.7948	8.33e-79	1.96e-76
CCG023789	70.2894	-1.79125	0.429034	-4.17507	2.98e-05	0.000220527
CCG023822	5979.8	1.32954	0.15373	8.64859	5.21e-18	1.34e-16
CCG023827	927.868	1.46527	0.314578	4.6579	3.19e-06	2.77e-05
CCG023832	2857.91	2.93835	0.230447	12.7507	3.09e-37	2.09e-35
CCG023838	17.3483	4.1702	1.03028	4.04765	5.17e-05	0.000367669
CCG023882	48.9405	2.49126	0.588131	4.2359	2.28e-05	0.000173578
CCG023894	4080.6	1.03287	0.118902	8.68671	3.73e-18	9.69e-17
CCG023896	79.0604	3.94865	0.49122	8.03846	9.1e-16	2.06e-14
CCG023900	8783.55	2.54064	0.197591	12.8581	7.75e-38	5.38e-36
CCG023903	308.079	3.13935	0.335421	9.35943	8.02e-21	2.5e-19
CCG023909	11623.7	1.0431	0.108892	9.57924	9.78e-22	3.21e-20
CCG023916	372.457	-1.11669	0.22106	-5.05154	4.38e-07	4.33e-06
CCG023924	452.652	1.28808	0.207277	6.21431	5.16e-10	7.2e-09
CCG023926	1970.61	-2.54551	0.22087	-11.5249	9.88e-31	5.08e-29
CCG023936	7863.75	-1.89587	0.186161	-10.184	2.34e-24	8.8e-23
CCG023944	6435.73	2.03191	0.128653	15.7938	3.43e-56	4.44e-54
CCG023946	7363.29	2.44139	0.188765	12.9335	2.91e-38	2.04e-36
CCG023947	385.542	1.61048	0.22456	7.17171	7.41e-13	1.33e-11
CCG023949	238.325	1.23039	0.290996	4.2282	2.36e-05	0.000178936
CCG023978	3507.61	1.23917	0.151535	8.17745	2.9e-16	6.7e-15
CCG023996	4208.73	3.84531	0.135148	28.4526	4.52e-178	2.47e-174
CCG024001	641.358	-1.32217	0.176873	-7.47522	7.71e-14	1.49e-12
CCG024008	8406.73	-1.2199	0.139764	-8.72832	2.58e-18	6.79e-17
CCG024009	7507.93	-1.27483	0.153561	-8.30178	1.03e-16	2.45e-15
CCG024014	969.989	-1.76492	0.220622	-7.99974	1.25e-15	2.8e-14
CCG024028	3629.03	1.26145	0.214621	5.87755	4.16e-09	5.28e-08
CCG024098	475.281	-1.65256	0.286478	-5.76855	8e-09	9.83e-08
CCG024119	1179.52	-2.24805	0.697385	-3.22354	0.00126615	0.00660606
CCG024122	1094.59	2.13263	0.24707	8.63169	6.05e-18	1.55e-16
CCG024129	115.028	1.2437	0.335045	3.71203	0.000205607	0.00130624
CCG024133	117.77	2.29155	0.34385	6.66441	2.66e-11	4.18e-10
CCG024135	24.4768	4.71401	1.05618	4.46329	8.07e-06	6.6e-05
CCG024148	479.766	-1.06185	0.211903	-5.01102	5.41e-07	5.28e-06
CCG024164	267.407	2.92586	0.316397	9.24744	2.3e-20	6.92e-19
CCG024170	35093.7	1.80518	0.143674	12.5644	3.32e-36	2.15e-34
CCG024174	25.4501	5.19532	1.07708	4.82352	1.41e-06	1.29e-05
CCG024184	5700.07	-2.61757	0.243578	-10.7464	6.17e-27	2.61e-25
CCG024192	3985.99	2.42049	0.189001	12.8068	1.5e-37	1.03e-35
CCG024261	39.9272	-2.83833	0.605555	-4.68716	2.77e-06	2.43e-05
CCG024277	56.7652	1.80441	0.475059	3.79828	0.000145706	0.000950831
CCG024279	525.11	2.29848	0.234341	9.80827	1.04e-22	3.61e-21
CCG024300	226.135	2.02748	0.347739	5.83048	5.53e-09	6.9e-08
CCG024346	65.3182	-2.81607	0.551969	-5.10187	3.36e-07	3.38e-06
CCG024348	2937.54	3.23242	0.123467	26.1804	4.44e-151	6.07e-148
CCG024349	441.634	8.54583	1.53252	5.57634	2.46e-08	2.84e-07
CCG024356	150.667	1.42446	0.293858	4.84743	1.25e-06	1.15e-05
CCG024360	6.81241	6.34264	1.93601	3.27613	0.00105239	0.00559808
CCG024363	1104.23	1.14594	0.192161	5.96342	2.47e-09	3.25e-08
CCG024372	228.993	1.42328	0.27225	5.22782	1.72e-07	1.8e-06
CCG024379	457.746	-1.30939	0.271795	-4.81759	1.45e-06	1.32e-05
CCG024409	44.1141	5.56528	0.868175	6.41032	1.45e-10	2.14e-09
CCG024410	183.139	3.02474	0.355017	8.51999	1.6e-17	3.99e-16
CCG024420	2210.17	2.56853	0.126503	20.3041	1.18e-91	4.1e-89
CCG024426	80.5692	3.42747	0.449833	7.61941	2.55e-14	5.13e-13
CCG024432	8.26594	6.62013	1.86025	3.55873	0.000372656	0.00224037
CCG024439	506.939	-1.46229	0.2004	-7.29684	2.95e-13	5.48e-12
CCG024455	2457.97	1.25956	0.261862	4.81002	1.51e-06	1.37e-05
CCG024458	3613.31	-1.07315	0.120467	-8.90827	5.18e-19	1.43e-17
CCG024463	505.054	-2.0948	0.338653	-6.18569	6.18e-10	8.55e-09
CCG024464	783.25	1.16469	0.170883	6.81573	9.38e-12	1.54e-10
CCG024491	670.535	3.27901	0.18738	17.4993	1.45e-68	2.62e-66
CCG024496	19.3089	7.844	1.63574	4.7954	1.62e-06	1.47e-05
CCG024510	1565.53	2.60279	0.166523	15.6302	4.54e-55	5.63e-53
CCG024517	732.03	1.99883	0.249185	8.02145	1.05e-15	2.35e-14
CCG024625	295.126	1.01392	0.222683	4.5532	5.28e-06	4.45e-05
CCG024630	932.166	-1.1119	0.321152	-3.46223	0.000535722	0.00308114
CCG024632	49.6864	1.99921	0.525003	3.808	0.000140094	0.00091722
CCG024643	1335.24	-1.34201	0.240109	-5.58917	2.28e-08	2.65e-07
CCG024649	120.908	4.12177	0.430671	9.57056	1.06e-21	3.48e-20
CCG024650	3945.49	1.64324	0.143533	11.4485	2.39e-30	1.2e-28
CCG024677	49.1771	5.73849	0.895426	6.40868	1.47e-10	2.16e-09
CCG024746	1768.32	-1.97533	0.280689	-7.03741	1.96e-12	3.4e-11
CCG024749	13522.3	1.92943	0.227975	8.46332	2.6e-17	6.43e-16
CCG024754	343.927	-1.16385	0.221783	-5.24767	1.54e-07	1.62e-06
CCG024755	3953.27	-1.09405	0.124034	-8.82057	1.14e-18	3.06e-17
CCG024757	616.436	-1.60548	0.340334	-4.71736	2.39e-06	2.12e-05
CCG024763	3730.4	-1.00692	0.130462	-7.71806	1.18e-14	2.45e-13
CCG024771	51.3411	-1.82075	0.505512	-3.6018	0.000316018	0.00192812
CCG024780	170.772	1.22005	0.284795	4.28397	1.84e-05	0.000142372
CCG024788	5013.73	1.35553	0.15252	8.88755	6.25e-19	1.71e-17
CCG024802	296.445	-1.60277	0.44308	-3.61735	0.000297638	0.00182937
CCG024812	398.831	2.09386	0.342429	6.11473	9.67e-10	1.32e-08
CCG024826	9539.31	1.09555	0.157649	6.94931	3.67e-12	6.21e-11
CCG024827	8074.87	1.52922	0.140938	10.8502	1.99e-27	8.63e-26
CCG024843	2291.59	-1.37794	0.15721	-8.76492	1.87e-18	4.93e-17
CCG024884	7632.69	-1.02714	0.145569	-7.05603	1.71e-12	2.99e-11
CCG024886	2083.39	-2.61193	0.181003	-14.4303	3.33e-47	3.14e-45
CCG024911	691.903	3.97578	0.304742	13.0464	6.66e-39	4.81e-37
CCG024912	1630.01	3.85001	0.147232	26.1494	1e-150	1.29e-147
CCG024916	142.942	3.24763	0.354372	9.16447	4.98e-20	1.47e-18
CCG024927	306.736	-1.21037	0.228684	-5.29277	1.2e-07	1.29e-06
CCG024929	7023.53	-1.84263	0.446508	-4.12675	3.68e-05	0.0002679
CCG024939	1462.66	1.4931	0.17721	8.42563	3.59e-17	8.79e-16
CCG024945	292.991	3.22848	0.295282	10.9336	7.97e-28	3.51e-26
CCG024946	701.493	3.19653	0.184714	17.3053	4.29e-67	7.39e-65
CCG024950	336.465	-1.62495	0.269138	-6.03761	1.56e-09	2.09e-08
CCG024959	113.695	5.60754	0.556442	10.0775	6.95e-24	2.54e-22
CCG024960	33.1518	7.17507	1.53646	4.66989	3.01e-06	2.62e-05
CCG024961	1001.5	2.12337	0.16767	12.664	9.36e-37	6.24e-35
CCG024966	2015.98	1.18024	0.15843	7.44957	9.36e-14	1.8e-12
CCG024975	92.3487	1.24414	0.352117	3.53331	0.00041039	0.00243858
CCG024977	10630.6	2.92839	0.128655	22.7616	1.1e-114	6.17e-112
CCG024978	7936.94	1.39106	0.150672	9.23239	2.65e-20	7.94e-19
CCG024984	3186.37	2.44781	0.166909	14.6655	1.07e-48	1.08e-46
CCG024985	561.775	1.11464	0.182324	6.11348	9.75e-10	1.33e-08
CCG024986	68.9635	3.09758	0.513726	6.02964	1.64e-09	2.19e-08
CCG024987	2252.36	1.12289	0.159011	7.06174	1.64e-12	2.87e-11
CCG024990	148.991	-1.50047	0.31039	-4.83415	1.34e-06	1.23e-05
CCG024995	488.598	1.04517	0.17589	5.94221	2.81e-09	3.67e-08
CCG025009	282.107	1.3696	0.257405	5.32081	1.03e-07	1.11e-06
CCG025011	1152.39	1.37303	0.138327	9.92599	3.21e-23	1.14e-21
CCG025019	1958.75	-1.33549	0.162318	-8.22762	1.91e-16	4.48e-15
CCG025024	1214.23	-1.62257	0.183008	-8.8661	7.58e-19	2.06e-17
CCG025025	1397.35	-1.16496	0.167335	-6.96185	3.36e-12	5.7e-11
CCG025037	1192.73	-1.11383	0.204455	-5.44779	5.1e-08	5.69e-07
[truncated: 401 more rows]

## Sheet: Table S3-3
Table S3-3. The differentially expressed genes (DEGs) of 6 hour vs Control
ID	baseMean	log2FoldChange	lfcSE	stat	pvalue	padj
CCG000005	1210.75	6.00936	0.270363	22.227	1.88e-109	3.37e-107
CCG000006	3606.14	2.51918	0.590482	4.26631	1.99e-05	7.23e-05
CCG000008	646.483	1.07405	0.29646	3.62292	0.000291301	0.000887437
CCG000009	6940.93	2.79784	0.22339	12.5245	5.49e-36	1.3e-34
CCG000019	20.4846	3.51562	0.923713	3.80597	0.000141249	0.00045402
CCG000031	5017.63	1.5158	0.180809	8.38346	5.14e-17	5.07e-16
CCG000035	6.7123	-5.93772	1.97456	-3.00712	0.00263739	0.00671876
CCG000038	4053.4	-1.67273	0.184105	-9.08574	1.03e-19	1.18e-18
CCG000039	2919.72	-1.16521	0.164512	-7.08282	1.41e-12	1.04e-11
CCG000050	12699.4	1.04961	0.18689	5.61619	1.95e-08	1.01e-07
CCG000065	103.774	3.80796	0.461391	8.25321	1.54e-16	1.48e-15
CCG000081	51.9659	2.46895	0.527734	4.6784	2.89e-06	1.18e-05
CCG000082	945.084	1.70681	0.260317	6.55667	5.5e-11	3.56e-10
CCG000083	129.146	2.18238	0.332082	6.57183	4.97e-11	3.23e-10
CCG000084	134.327	2.57942	0.37305	6.9144	4.7e-12	3.32e-11
CCG000086	83.9666	3.10568	0.530449	5.85482	4.78e-09	2.61e-08
CCG000087	802.638	-1.08202	0.260724	-4.15005	3.32e-05	0.00011694
CCG000088	1606.97	-4.80945	0.252401	-19.0548	6e-81	5.27e-79
CCG000090	29.1565	-1.97986	0.687906	-2.87809	0.00400085	0.00978186
CCG000094	32.0593	-4.70605	0.946256	-4.97333	6.58e-07	2.89e-06
CCG000096	432.366	-3.49713	0.267767	-13.0603	5.55e-39	1.49e-37
CCG000097	433.044	4.09501	0.246132	16.6374	3.73e-62	2.05e-60
CCG000099	1343.73	1.84665	0.196927	9.37737	6.76e-21	8.2e-20
CCG000101	7130.12	2.53285	0.227362	11.1402	8e-29	1.39e-27
CCG000107	82.9556	5.44465	0.70262	7.74906	9.26e-15	7.94e-14
CCG000112	1259.77	-1.0063	0.160161	-6.28305	3.32e-10	2.02e-09
CCG000118	61.698	4.14546	0.660943	6.27204	3.56e-10	2.16e-09
CCG000123	140.451	-2.00667	0.375095	-5.34976	8.81e-08	4.27e-07
CCG000125	194.144	-5.51014	0.478203	-11.5226	1.02e-30	1.92e-29
CCG000153	23821.8	-1.35251	0.159207	-8.4953	1.97e-17	2e-16
CCG000154	3467.53	1.25726	0.136153	9.23417	2.6e-20	3.05e-19
CCG000156	50.7448	-2.50062	0.660734	-3.78461	0.000153952	0.000491158
CCG000159	28.657	-2.81993	0.732657	-3.84891	0.000118644	0.000385709
CCG000165	11.8202	4.79499	1.4522	3.30187	0.000960412	0.00267039
CCG000167	364.52	2.03031	0.230989	8.78967	1.5e-18	1.62e-17
CCG000169	18391.1	2.14699	0.146331	14.6722	9.72e-49	3.64e-47
CCG000170	4452.02	1.55542	0.176255	8.82483	1.1e-18	1.19e-17
CCG000172	740.02	-1.5485	0.196408	-7.8841	3.17e-15	2.81e-14
CCG000177	645.275	1.72239	0.233333	7.38171	1.56e-13	1.23e-12
CCG000190	68.4286	-1.89492	0.551183	-3.43791	0.000586228	0.001692
CCG000193	139.889	-1.52881	0.327292	-4.67108	3e-06	1.22e-05
CCG000195	2995.07	2.12812	0.205864	10.3375	4.77e-25	6.99e-24
CCG000199	80.6383	1.53197	0.466901	3.28115	0.00103386	0.00285497
CCG000209	38.8341	-2.46975	0.610242	-4.04717	5.18e-05	0.000177543
CCG000211	522.682	1.17024	0.233241	5.01728	5.24e-07	2.33e-06
CCG000215	10.6438	7.11467	1.80259	3.94691	7.92e-05	0.000264053
CCG000218	1742.77	-1.51047	0.198096	-7.62494	2.44e-14	2.02e-13
CCG000221	1018.98	-1.34069	0.206528	-6.49154	8.5e-11	5.42e-10
CCG000222	490.428	-4.03993	0.304648	-13.261	3.9e-40	1.1e-38
CCG000224	586.037	-1.43493	0.209814	-6.83905	7.97e-12	5.53e-11
CCG000229	42.6094	9.11353	1.58297	5.75723	8.55e-09	4.57e-08
CCG000230	39.4845	5.95163	0.994218	5.98624	2.15e-09	1.22e-08
CCG000232	527.4	4.82704	0.347764	13.8802	8.35e-44	2.69e-42
CCG000233	1744.1	3.64903	0.326829	11.1649	6.05e-29	1.06e-27
CCG000234	699.881	4.00983	0.809632	4.95266	7.32e-07	3.2e-06
CCG000241	5806.89	-3.15503	0.192345	-16.403	1.82e-60	9.48e-59
CCG000242	637.009	-1.92728	0.186756	-10.3198	5.74e-25	8.37e-24
CCG000243	191.124	-1.24661	0.305034	-4.08679	4.37e-05	0.000151312
CCG000247	13.076	7.41328	1.82261	4.06739	4.75e-05	0.000163605
CCG000248	135.159	2.65262	0.335654	7.90285	2.73e-15	2.43e-14
CCG000258	19.4882	3.86221	0.93891	4.11351	3.9e-05	0.000135807
CCG000261	58.0509	-1.50279	0.494585	-3.03849	0.0023777	0.0061163
CCG000267	3607.24	-2.03116	0.153643	-13.22	6.72e-40	1.89e-38
CCG000276	506.763	2.88248	0.22065	13.0636	5.32e-39	1.43e-37
CCG000282	8042.02	1.87938	0.130018	14.4548	2.34e-47	8.27e-46
CCG000289	3544.41	3.72252	0.164585	22.6176	2.91e-113	5.62e-111
CCG000294	904.253	-1.02027	0.246343	-4.14165	3.45e-05	0.000121042
CCG000312	1071.76	1.64003	0.168317	9.74369	1.96e-22	2.54e-21
CCG000313	760.542	7.76834	1.45575	5.33633	9.48e-08	4.58e-07
CCG000320	2350.62	1.34263	0.160774	8.35099	6.77e-17	6.63e-16
CCG000333	15163.3	1.70672	0.149416	11.4226	3.23e-30	5.98e-29
CCG000334	18881.1	2.14941	0.232626	9.23974	2.47e-20	2.9e-19
CCG000337	5623.01	4.13502	0.197672	20.9186	3.62e-97	4.66e-95
CCG000338	184.983	2.18259	0.413666	5.27621	1.32e-07	6.27e-07
CCG000339	51635.2	1.21165	0.174338	6.95003	3.65e-12	2.6e-11
CCG000340	1127.08	-1.2422	0.187912	-6.61053	3.83e-11	2.51e-10
CCG000342	12968.6	1.04514	0.134799	7.75337	8.95e-15	7.69e-14
CCG000345	198.318	-2.18034	0.30777	-7.0843	1.4e-12	1.03e-11
CCG000351	1119.32	-2.45483	0.228559	-10.7405	6.57e-27	1.06e-25
CCG000352	5673.34	-1.80827	0.140408	-12.8787	5.93e-38	1.51e-36
CCG000355	222.687	-3.69888	0.362061	-10.2162	1.68e-24	2.39e-23
CCG000365	6827.25	1.06492	0.30234	3.52225	0.000427894	0.00126574
CCG000368	1157.68	1.25873	0.168754	7.45893	8.72e-14	6.97e-13
CCG000374	1155.39	-3.94423	0.228882	-17.2326	1.51e-66	9.21e-65
CCG000375	1801	-5.27632	0.216989	-24.3161	1.32e-130	3.73e-128
CCG000376	288.154	-1.85658	0.285343	-6.50647	7.69e-11	4.93e-10
CCG000380	847.011	1.002	0.192774	5.19777	2.02e-07	9.39e-07
CCG000381	1994.38	1.82692	0.173579	10.525	6.63e-26	1.01e-24
CCG000383	98.3824	3.99146	0.448552	8.89855	5.66e-19	6.24e-18
CCG000384	34.4323	5.32826	0.992695	5.36747	7.99e-08	3.88e-07
CCG000385	679.302	4.00161	0.251515	15.91	5.4e-57	2.58e-55
CCG000386	29.1096	3.29811	0.740974	4.45104	8.55e-06	3.28e-05
CCG000389	42.9359	-1.76306	0.561421	-3.14035	0.00168746	0.00447474
CCG000390	4960.76	1.52521	0.331207	4.60501	4.12e-06	1.65e-05
CCG000391	4086.94	2.71424	0.289644	9.37095	7.19e-21	8.69e-20
CCG000392	29171.1	1.25082	0.241075	5.18851	2.12e-07	9.84e-07
CCG000394	32321.9	1.838	0.250223	7.34545	2.05e-13	1.6e-12
CCG000396	2464.79	-3.54151	0.156775	-22.5898	5.46e-113	1.05e-110
CCG000397	1562	-2.96053	0.229856	-12.8799	5.84e-38	1.49e-36
CCG000398	6914.26	-3.44535	0.14693	-23.449	1.35e-121	3.3e-119
CCG000400	11434.9	-1.9452	0.141221	-13.7741	3.65e-43	1.15e-41
CCG000401	54386.5	-2.29946	0.157589	-14.5915	3.18e-48	1.17e-46
CCG000402	89384.5	-2.30815	0.149728	-15.4156	1.29e-53	5.59e-52
CCG000403	110318	-1.84075	0.168505	-10.924	8.85e-28	1.48e-26
CCG000404	10792	-1.88028	0.157645	-11.9273	8.53e-33	1.76e-31
CCG000406	3096.39	-1.03077	0.145311	-7.09355	1.31e-12	9.62e-12
CCG000418	192.267	-1.00461	0.279239	-3.59765	0.000321102	0.000970775
CCG000420	648.286	-1.14354	0.212699	-5.3763	7.6e-08	3.7e-07
CCG000429	1261.25	-2.12645	0.318118	-6.68448	2.32e-11	1.55e-10
CCG000431	8758.38	-2.16679	0.196419	-11.0315	2.69e-28	4.59e-27
CCG000443	11312.4	-1.60863	0.169523	-9.48914	2.33e-21	2.88e-20
CCG000456	3072.77	-1.43111	0.181126	-7.90115	2.76e-15	2.46e-14
CCG000460	2625.14	1.70223	0.143451	11.8663	1.77e-32	3.6e-31
CCG000474	360.892	-1.90735	0.234905	-8.11964	4.68e-16	4.36e-15
CCG000475	98.9836	-1.91596	0.437533	-4.37902	1.19e-05	4.48e-05
CCG000476	544.09	1.81204	0.299264	6.05499	1.4e-09	8.07e-09
CCG000485	99.6627	-1.23669	0.362092	-3.4154	0.00063689	0.00182684
CCG000507	24.7372	-4.71871	1.11899	-4.21695	2.48e-05	8.87e-05
CCG000508	15.4649	-4.62116	1.38078	-3.34678	0.000817569	0.0023064
CCG000510	7100.5	2.03097	0.169133	12.0081	3.22e-33	6.73e-32
CCG000511	2396.52	1.14792	0.143267	8.01241	1.12e-15	1.03e-14
CCG000515	112.718	-2.26483	0.379046	-5.97507	2.3e-09	1.3e-08
CCG000516	132.548	-3.11478	0.432067	-7.20903	5.64e-13	4.26e-12
CCG000518	1697.72	-1.48411	0.216119	-6.86709	6.55e-12	4.57e-11
CCG000524	2522.98	1.31668	0.167462	7.86257	3.76e-15	3.32e-14
CCG000528	594.831	-1.87157	0.235571	-7.94483	1.94e-15	1.75e-14
CCG000532	106.167	4.44916	0.589094	7.55255	4.27e-14	3.48e-13
CCG000533	1130.24	4.54345	0.692773	6.55836	5.44e-11	3.52e-10
CCG000537	51.0132	3.21282	0.58515	5.49059	4.01e-08	2e-07
CCG000547	10916.3	1.83195	0.12982	14.1115	3.23e-45	1.07e-43
CCG000550	650.086	-1.07874	0.206043	-5.23551	1.65e-07	7.73e-07
CCG000551	37.6994	-2.31246	0.668537	-3.45898	0.000542216	0.00157376
CCG000591	1612.24	-1.27136	0.161699	-7.86251	3.77e-15	3.32e-14
CCG000594	18.4332	3.33878	0.924275	3.61232	0.00030347	0.000920348
CCG000597	94.0503	-1.38072	0.446249	-3.09406	0.00197441	0.00515749
CCG000615	134.246	-1.71355	0.343539	-4.98793	6.1e-07	2.69e-06
CCG000638	620.927	-2.91582	0.303944	-9.59329	8.53e-22	1.08e-20
CCG000639	301.157	-4.53786	0.335965	-13.5069	1.42e-41	4.21e-40
CCG000650	4452.12	2.16408	0.209241	10.3425	4.53e-25	6.65e-24
CCG000653	254.916	1.56498	0.317067	4.93581	7.98e-07	3.48e-06
CCG000662	3437.3	1.36992	0.215633	6.35301	2.11e-10	1.3e-09
CCG000664	628.422	3.10358	0.375203	8.27173	1.32e-16	1.27e-15
CCG000665	1793.95	1.93001	0.205944	9.37154	7.15e-21	8.64e-20
CCG000671	1911.69	7.62653	0.279316	27.3043	3.77e-164	2.48e-161
CCG000672	62.0755	9.65865	1.51755	6.36462	1.96e-10	1.21e-09
CCG000679	92.5612	2.37351	0.437635	5.42349	5.84e-08	2.87e-07
CCG000683	654.807	-2.7022	0.268006	-10.0826	6.59e-24	9.15e-23
CCG000684	538.745	2.38332	0.257578	9.25281	2.19e-20	2.58e-19
CCG000693	166.269	-1.53995	0.296209	-5.19889	2e-07	9.33e-07
CCG000717	9061.94	1.05585	0.170222	6.20277	5.55e-10	3.31e-09
CCG000719	245.257	-1.47198	0.260095	-5.65941	1.52e-08	7.92e-08
CCG000721	55244.8	1.56019	0.25783	6.05121	1.44e-09	8.25e-09
CCG000723	27.2168	3.04576	0.74646	4.08027	4.5e-05	0.000155319
CCG000742	705.126	-1.06581	0.198499	-5.36936	7.9e-08	3.84e-07
CCG000746	78826.9	3.25858	0.127976	25.4624	5.14e-143	1.87e-140
CCG000755	473.272	-2.36972	0.229402	-10.33	5.16e-25	7.54e-24
CCG000756	352.564	-2.88556	0.328031	-8.7966	1.41e-18	1.52e-17
CCG000770	1139.74	-1.93136	0.199245	-9.69339	3.22e-22	4.14e-21
CCG000774	83.6374	-1.9456	0.451599	-4.30824	1.65e-05	6.06e-05
CCG000780	2240.12	-2.32806	0.146379	-15.9043	5.91e-57	2.81e-55
CCG000814	298.484	4.29108	0.356825	12.0257	2.6e-33	5.49e-32
CCG000815	3346.82	-1.26551	0.142941	-8.8534	8.49e-19	9.29e-18
CCG000816	1415.94	1.06796	0.15738	6.78586	1.15e-11	7.88e-11
CCG000818	515.978	-3.01832	0.253491	-11.907	1.09e-32	2.24e-31
CCG000819	18936.5	-1.07575	0.127356	-8.44677	2.99e-17	3e-16
CCG000821	1361.86	-2.02624	0.179662	-11.2781	1.68e-29	3.03e-28
CCG000822	2011.88	1.26445	0.224223	5.63923	1.71e-08	8.86e-08
CCG000828	751.91	-2.64758	0.218411	-12.122	8.07e-34	1.75e-32
CCG000829	931.775	1.10129	0.182618	6.03058	1.63e-09	9.35e-09
CCG000837	17514.1	1.24319	0.22096	5.6263	1.84e-08	9.53e-08
CCG000842	2195.93	3.91572	0.164425	23.8147	2.35e-125	6.16e-123
CCG000846	904.202	1.71196	0.172731	9.91115	3.72e-23	5.01e-22
CCG000847	3545.24	2.27334	0.184407	12.3278	6.42e-35	1.46e-33
CCG000850	256.993	6.92604	0.555175	12.4754	1.02e-35	2.38e-34
CCG000869	3611.34	-1.93407	0.149246	-12.9589	2.09e-38	5.43e-37
CCG000872	179.803	4.55631	0.374263	12.1741	4.27e-34	9.39e-33
CCG000873	56.072	-1.83574	0.623449	-2.94449	0.00323485	0.00806699
CCG000886	66844.8	2.35322	0.15848	14.8487	7.1e-50	2.76e-48
CCG000890	2063.82	-2.82121	0.18876	-14.946	1.65e-50	6.53e-49
CCG000895	224.167	1.0124	0.264898	3.82186	0.000132451	0.000427905
CCG000896	493.428	1.60939	0.219392	7.33566	2.21e-13	1.72e-12
CCG000903	68.105	-1.68318	0.475933	-3.5366	0.00040532	0.0012049
CCG000904	85.0516	-2.00267	0.426658	-4.69386	2.68e-06	1.1e-05
CCG000905	373.416	-1.7113	0.231871	-7.38041	1.58e-13	1.24e-12
CCG000906	52.2474	-1.78605	0.562989	-3.17245	0.0015116	0.00404119
CCG000917	5648.4	1.02712	0.133738	7.68008	1.59e-14	1.34e-13
CCG000918	3496.1	1.92484	0.154193	12.4833	9.21e-36	2.16e-34
CCG000919	959.041	3.06067	0.209921	14.5801	3.76e-48	1.37e-46
CCG000922	61239.1	1.5371	0.126695	12.1323	7.12e-34	1.56e-32
CCG000926	60.0037	9.60969	1.51977	6.3231	2.56e-10	1.57e-09
CCG000928	318.714	1.22905	0.307654	3.99491	6.47e-05	0.000218518
CCG000934	673.471	-2.55716	0.202976	-12.5983	2.16e-36	5.15e-35
CCG000935	40.2743	-3.37466	0.70209	-4.80659	1.54e-06	6.47e-06
CCG000943	342.333	2.11234	0.230141	9.17847	4.37e-20	5.09e-19
CCG000961	7.06913	-6.01333	1.94869	-3.08584	0.0020298	0.00528791
CCG000962	192.352	1.8688	0.340634	5.48623	4.11e-08	2.05e-07
CCG000983	20013.3	1.24702	0.209823	5.94321	2.79e-09	1.56e-08
CCG000994	4399.79	1.03568	0.179377	5.77374	7.75e-09	4.16e-08
CCG000996	715.253	-2.02179	0.183246	-11.0332	2.64e-28	4.5e-27
CCG001002	1029.84	1.64623	0.181044	9.093	9.63e-20	1.1e-18
CCG001003	2818.57	2.43746	0.152572	15.9758	1.88e-57	9.14e-56
CCG001004	7078.13	2.51712	0.142938	17.6099	2.07e-69	1.35e-67
CCG001005	1154.62	-1.79338	0.178161	-10.0661	7.8e-24	1.08e-22
CCG001023	18.7955	6.47986	1.6368	3.95887	7.53e-05	0.00025212
CCG001027	486.508	-1.65225	0.25001	-6.60873	3.88e-11	2.54e-10
CCG001044	26.7147	-2.69627	0.737425	-3.65633	0.000255851	0.000787101
CCG001045	849.803	1.34237	0.202811	6.61882	3.62e-11	2.38e-10
CCG001051	40.2784	-1.86505	0.617806	-3.01882	0.00253762	0.00648988
CCG001052	3152.05	-1.8495	0.153709	-12.0324	2.4e-33	5.08e-32
CCG001055	1833.66	-3.47208	0.195593	-17.7516	1.68e-70	1.13e-68
CCG001056	70.2401	-1.49019	0.426866	-3.49099	0.000481235	0.00141002
CCG001072	5893.69	2.11718	0.131698	16.076	3.76e-58	1.86e-56
CCG001073	553.966	1.46048	0.188934	7.73011	1.07e-14	9.17e-14
CCG001077	170.783	-1.5399	0.297097	-5.18315	2.18e-07	1.01e-06
CCG001080	126.805	-2.19915	0.499794	-4.40011	1.08e-05	4.09e-05
CCG001082	1771.78	-1.17663	0.232043	-5.07074	3.96e-07	1.78e-06
CCG001085	3160.24	1.29662	0.196553	6.59679	4.2e-11	2.75e-10
CCG001087	192.746	-5.62005	0.590209	-9.52213	1.7e-21	2.11e-20
CCG001088	505.28	-3.79256	0.400197	-9.47674	2.62e-21	3.24e-20
CCG001089	26.0123	-4.07427	1.02089	-3.99089	6.58e-05	0.000222184
CCG001090	1528.07	-3.10235	0.299412	-10.3615	3.71e-25	5.49e-24
CCG001091	657.788	-2.80854	0.339628	-8.26947	1.35e-16	1.3e-15
CCG001092	671.205	-3.08104	0.337602	-9.12623	7.09e-20	8.16e-19
CCG001095	516.714	2.36331	0.301789	7.83102	4.84e-15	4.23e-14
CCG001105	230.443	-1.28257	0.267786	-4.78954	1.67e-06	7.02e-06
CCG001106	241.129	-1.25057	0.251256	-4.97727	6.45e-07	2.84e-06
CCG001118	801.481	2.46008	0.175859	13.9889	1.82e-44	5.96e-43
CCG001127	15797	3.37035	0.173188	19.4607	2.37e-84	2.25e-82
CCG001156	747.979	1.77531	0.186608	9.5136	1.84e-21	2.29e-20
CCG001157	616.756	1.78453	0.186076	9.59031	8.78e-22	1.11e-20
CCG001159	2017.41	1.49742	0.200583	7.46533	8.31e-14	6.65e-13
CCG001160	10.6886	5.6557	1.76046	3.21263	0.00131527	0.0035552
CCG001165	1042.57	-2.41888	0.196697	-12.2975	9.35e-35	2.12e-33
CCG001167	4146.33	1.88777	0.191042	9.88144	5.01e-23	6.7e-22
CCG001171	1007.27	1.23728	0.176199	7.02209	2.19e-12	1.58e-11
CCG001174	894.016	-1.38653	0.186852	-7.42045	1.17e-13	9.27e-13
CCG001178	6333.14	-1.0942	0.153875	-7.11096	1.15e-12	8.54e-12
CCG001181	22831.9	1.44288	0.140081	10.3003	7.02e-25	1.02e-23
CCG001182	35.2486	-1.96154	0.637079	-3.07895	0.0020773	0.00540151
CCG001184	249.207	-4.51115	0.388125	-11.6229	3.15e-31	6.07e-30
CCG001194	16.4387	3.33679	0.988941	3.37411	0.00074055	0.0021022
CCG001197	480.307	-1.19721	0.35225	-3.39874	0.000676979	0.00193409
CCG001199	2726.22	-1.1787	0.239804	-4.91527	8.87e-07	3.84e-06
CCG001206	760.959	-2.76731	0.322484	-8.58124	9.39e-18	9.69e-17
CCG001207	3451.96	1.11209	0.13479	8.25055	1.58e-16	1.51e-15
CCG001208	3856.84	1.07418	0.206091	5.21216	1.87e-07	8.71e-07
CCG001209	3082.18	2.10988	0.173601	12.1537	5.49e-34	1.2e-32
CCG001234	833.044	-1.3597	0.175467	-7.74903	9.26e-15	7.94e-14
CCG001235	7591.8	1.18586	0.139056	8.52793	1.49e-17	1.51e-16
CCG001238	1468.64	3.00256	0.208051	14.4318	3.26e-47	1.14e-45
CCG001239	154.796	-1.30413	0.351663	-3.70848	0.000208506	0.000650816
CCG001241	488.314	3.37396	0.258393	13.0575	5.76e-39	1.54e-37
CCG001242	674.936	3.71525	0.250472	14.833	8.96e-50	3.47e-48
CCG001243	110.435	4.10106	0.43657	9.39383	5.79e-21	7.04e-20
CCG001245	731.932	3.4292	0.2798	12.2559	1.56e-34	3.5e-33
CCG001246	1026.91	3.29337	0.266871	12.3407	5.47e-35	1.25e-33
CCG001256	40.2265	-2.07886	0.591889	-3.51226	0.000444317	0.00130893
CCG001258	8055.43	1.56282	0.127673	12.2408	1.88e-34	4.19e-33
CCG001260	35419.1	-2.96891	0.186067	-15.9561	2.58e-57	1.24e-55
CCG001266	38.6533	3.701	0.837607	4.41854	9.94e-06	3.78e-05
CCG001269	8058.16	-1.97581	0.158974	-12.4285	1.83e-35	4.26e-34
CCG001274	407.707	-1.10943	0.222553	-4.98503	6.2e-07	2.73e-06
CCG001277	18166.3	-1.00578	0.154452	-6.51192	7.42e-11	4.76e-10
CCG001278	665.931	2.08111	0.184186	11.299	1.33e-29	2.39e-28
CCG001286	833.394	2.4976	0.22376	11.1619	6.26e-29	1.09e-27
CCG001296	847.117	-1.93322	0.260996	-7.40707	1.29e-13	1.02e-12
CCG001304	6322.1	3.12304	0.178296	17.5161	1.08e-68	6.98e-67
CCG001305	4298.24	-1.83971	0.180156	-10.2118	1.76e-24	2.5e-23
CCG001320	120.8	1.43166	0.350489	4.08475	4.41e-05	0.000152548
CCG001327	2557.46	-6.02516	0.258646	-23.295	4.98e-120	1.19e-117
CCG001328	11.4913	-6.71379	1.76711	-3.7993	0.000145104	0.000465066
CCG001330	109.657	1.99877	0.359782	5.55549	2.77e-08	1.41e-07
CCG001336	2310.48	1.81561	0.209978	8.64665	5.3e-18	5.55e-17
CCG001340	33.0728	5.24437	1.01709	5.15626	2.52e-07	1.16e-06
CCG001344	25.5121	-2.5959	0.845246	-3.07117	0.00213219	0.00553389
CCG001347	60.6717	4.19574	0.593642	7.0678	1.57e-12	1.15e-11
CCG001348	663.153	-2.10332	0.227688	-9.23773	2.52e-20	2.96e-19
CCG001349	2236.11	-1.18207	0.198114	-5.96662	2.42e-09	1.36e-08
CCG001355	33.7648	-1.96218	0.649261	-3.02218	0.00250964	0.00642573
CCG001357	10054.1	1.22677	0.183199	6.69639	2.14e-11	1.43e-10
CCG001359	113.736	-1.13684	0.355972	-3.19363	0.00140495	0.00377648
CCG001362	2898.92	1.03473	0.141931	7.29038	3.09e-13	2.38e-12
CCG001363	479.252	1.01573	0.195653	5.19147	2.09e-07	9.69e-07
CCG001364	10347.9	1.4533	0.151849	9.57074	1.06e-21	1.34e-20
CCG001367	169.885	-2.30989	0.325425	-7.09805	1.27e-12	9.33e-12
CCG001372	958.781	-4.76861	0.216395	-22.0366	1.28e-107	2.16e-105
CCG001376	824.319	3.57199	0.223923	15.9519	2.76e-57	1.33e-55
CCG001381	66.7738	-3.34668	0.559974	-5.97649	2.28e-09	1.29e-08
CCG001382	85.8224	-2.84746	0.467528	-6.09046	1.13e-09	6.55e-09
CCG001383	148.937	-3.09845	0.39309	-7.88231	3.21e-15	2.85e-14
CCG001416	930.78	-1.98142	0.176488	-11.227	3.01e-29	5.35e-28
CCG001419	1370.95	1.43126	0.208345	6.86964	6.44e-12	4.49e-11
CCG001420	84.7744	-1.64697	0.49768	-3.30929	0.000935325	0.00260618
CCG001421	11295.8	1.46033	0.189572	7.70331	1.33e-14	1.12e-13
CCG001423	186.926	3.7545	0.328251	11.4379	2.7e-30	5.03e-29
CCG001426	1135.12	4.98621	0.267434	18.6446	1.4e-77	1.14e-75
CCG001427	51.0795	9.37519	1.56851	5.97713	2.27e-09	1.28e-08
CCG001431	461.669	-1.34984	0.206427	-6.5391	6.19e-11	3.99e-10
CCG001439	5513.04	1.09352	0.131886	8.29135	1.12e-16	1.09e-15
CCG001440	40.9293	3.05834	0.677248	4.51584	6.31e-06	2.46e-05
CCG001442	1356.79	-3.04474	0.179731	-16.9406	2.26e-64	1.32e-62
CCG001444	2603.89	-1.00381	0.283061	-3.54627	0.000390729	0.00116527
CCG001450	1276.08	1.15558	0.174876	6.60802	3.89e-11	2.55e-10
CCG001451	514.278	1.30055	0.268914	4.83629	1.32e-06	5.61e-06
CCG001458	145.068	4.60861	0.490255	9.40045	5.43e-21	6.62e-20
CCG001459	16.9438	2.66608	0.880986	3.02624	0.00247612	0.00634649
CCG001469	1338.04	1.45435	0.17743	8.19672	2.47e-16	2.33e-15
CCG001484	121.488	-1.23127	0.337207	-3.65138	0.000260832	0.000800873
CCG001487	4163.91	-1.3754	0.135981	-10.1146	4.76e-24	6.65e-23
CCG001488	2708.45	-1.82491	0.162085	-11.259	2.09e-29	3.75e-28
CCG001501	14452.3	1.46498	0.161521	9.06992	1.19e-19	1.35e-18
CCG001505	71.6333	-2.37262	0.473758	-5.00809	5.5e-07	2.43e-06
CCG001514	678.938	-1.0333	0.198042	-5.21758	1.81e-07	8.47e-07
CCG001517	27.6154	-3.84672	0.885673	-4.34328	1.4e-05	5.21e-05
CCG001531	2544.02	1.46496	0.142021	10.3151	6.02e-25	8.78e-24
CCG001534	1626.3	1.1469	0.256685	4.4681	7.89e-06	3.04e-05
CCG001543	761.086	-2.53323	0.190779	-13.2784	3.09e-40	8.77e-39
CCG001545	164.263	3.98482	0.395927	10.0645	7.93e-24	1.09e-22
CCG001546	18.0596	3.10882	0.898973	3.4582	0.000543807	0.00157734
CCG001554	99.5572	1.75326	0.466407	3.75908	0.00017054	0.000539844
CCG001555	6080.84	1.2775	0.180984	7.05866	1.68e-12	1.23e-11
CCG001570	36836.1	2.2828	0.216838	10.5277	6.44e-26	9.87e-25
CCG001575	78.7961	-1.8683	0.415161	-4.50017	6.79e-06	2.64e-05
CCG001580	2177.28	-2.04452	0.162394	-12.5899	2.4e-36	5.71e-35
CCG001594	329.978	3.5059	0.297483	11.7852	4.65e-32	9.31e-31
CCG001595	259.48	-2.90923	0.322828	-9.01172	2.03e-19	2.27e-18
CCG001604	4958.65	1.65165	0.155101	10.6488	1.77e-26	2.79e-25
CCG001629	290.674	1.09113	0.274491	3.97512	7.03e-05	0.000236609
CCG001631	48.209	-2.4394	0.585884	-4.16363	3.13e-05	0.000110527
CCG001632	441.56	-1.74257	0.218832	-7.96305	1.68e-15	1.52e-14
CCG001634	2018.75	-3.39145	0.211622	-16.026	8.41e-58	4.11e-56
CCG001638	1610.74	-1.22025	0.164902	-7.39985	1.36e-13	1.08e-12
CCG001647	165.315	-1.8267	0.328153	-5.5666	2.6e-08	1.32e-07
CCG001651	100.891	1.2037	0.361311	3.33147	0.000863895	0.00242553
CCG001654	217.523	2.50826	0.304955	8.22502	1.95e-16	1.86e-15
CCG001655	61.802	-2.45822	0.557705	-4.40773	1.04e-05	3.96e-05
CCG001661	124.492	3.3642	0.448915	7.49407	6.68e-14	5.38e-13
CCG001662	15916.8	1.53818	0.134791	11.4116	3.66e-30	6.76e-29
CCG001665	159.812	-1.66551	0.314039	-5.30353	1.14e-07	5.44e-07
CCG001683	116.106	5.61466	0.634481	8.84921	8.81e-19	9.63e-18
CCG001689	884.776	-2.22523	0.18725	-11.8837	1.44e-32	2.94e-31
CCG001697	262.322	4.00301	0.404537	9.89529	4.36e-23	5.85e-22
CCG001698	348.679	3.5811	0.306412	11.6872	1.48e-31	2.89e-30
CCG001705	246.54	-3.06894	0.295684	-10.3791	3.09e-25	4.58e-24
CCG001719	2294.37	-1.09768	0.150595	-7.28894	3.12e-13	2.41e-12
CCG001723	5181.96	-1.28986	0.143873	-8.96527	3.1e-19	3.45e-18
CCG001725	3800.6	1.88237	0.155504	12.1049	9.94e-34	2.15e-32
CCG001729	7327.5	-1.06763	0.172197	-6.20003	5.65e-10	3.37e-09
CCG001745	1551.76	-1.59577	0.181085	-8.81227	1.23e-18	1.33e-17
CCG001746	106.232	1.43615	0.424781	3.38092	0.000722433	0.00205602
CCG001747	49.6206	2.58256	0.598703	4.3136	1.61e-05	5.92e-05
CCG001754	4448.08	2.40147	0.177042	13.5644	6.51e-42	1.96e-40
CCG001770	2674.53	2.44863	0.141301	17.3292	2.83e-67	1.77e-65
CCG001779	73.7184	2.41874	0.443632	5.45214	4.98e-08	2.46e-07
CCG001780	148.094	2.26982	0.681258	3.33181	0.000862826	0.00242361
CCG001782	63.9448	1.71919	0.453705	3.78922	0.000151119	0.000482742
CCG001787	33.8433	1.89374	0.649197	2.91704	0.00353367	0.00874157
CCG001789	156.141	1.62088	0.502954	3.22272	0.0012698	0.00344154
CCG001790	86.7822	2.63658	0.427978	6.16054	7.25e-10	4.29e-09
CCG001822	329.068	3.03602	0.27168	11.175	5.41e-29	9.49e-28
CCG001823	6172.74	2.43285	0.158306	15.368	2.68e-53	1.16e-51
CCG001830	33.2987	-2.12517	0.656514	-3.23706	0.00120769	0.00328922
CCG001831	172.912	-2.36943	0.368009	-6.43852	1.21e-10	7.62e-10
CCG001836	6744.6	1.47989	0.156318	9.46718	2.87e-21	3.54e-20
CCG001839	1730.17	-1.62992	0.16387	-9.9464	2.61e-23	3.53e-22
CCG001842	666.412	1.4168	0.205144	6.90634	4.97e-12	3.5e-11
CCG001844	4694	1.19876	0.153286	7.82041	5.26e-15	4.59e-14
CCG001846	223.455	1.57968	0.278789	5.66621	1.46e-08	7.63e-08
CCG001850	6.86334	6.48038	1.97321	3.28419	0.00102277	0.00282645
CCG001853	254.868	3.28489	0.314072	10.459	1.33e-25	2.01e-24
CCG001855	3047.44	1.46574	0.196986	7.44085	1e-13	7.98e-13
CCG001859	67.6394	-4.76775	0.673242	-7.08178	1.42e-12	1.04e-11
CCG001860	1492.74	3.40467	0.185897	18.3148	6.31e-75	4.78e-73
CCG001869	5318.58	-1.20356	0.24655	-4.88161	1.05e-06	4.52e-06
CCG001870	4008.3	3.90618	0.782745	4.99037	6.03e-07	2.66e-06
CCG001871	2325.19	1.29672	0.179911	7.20754	5.7e-13	4.31e-12
CCG001876	1316.07	1.12123	0.157798	7.10544	1.2e-12	8.87e-12
CCG001883	8.70115	-6.31336	1.86746	-3.38072	0.000722961	0.00205699
CCG001885	311.191	-1.12354	0.242743	-4.62853	3.68e-06	1.48e-05
CCG001893	1121.77	-2.78606	0.212714	-13.0977	3.4e-39	9.19e-38
CCG001894	1024.14	1.72342	0.246611	6.98842	2.78e-12	2e-11
CCG001895	243.86	4.77109	0.375331	12.7117	5.09e-37	1.25e-35
CCG001897	5067.65	-2.68447	0.20852	-12.8739	6.31e-38	1.61e-36
CCG001906	104.385	-2.15768	0.390933	-5.51932	3.4e-08	1.71e-07
CCG001916	9068.69	2.44567	0.156852	15.5922	8.23e-55	3.67e-53
CCG001917	368.842	1.68175	0.233047	7.21636	5.34e-13	4.05e-12
CCG001918	46.1764	1.61081	0.529262	3.0435	0.00233844	0.00601997
CCG001923	348.133	-1.91677	0.247215	-7.75347	8.94e-15	7.69e-14
CCG001932	2331.02	-1.57356	0.149011	-10.56	4.57e-26	7.08e-25
CCG001933	5985.5	1.25141	0.133452	9.37725	6.77e-21	8.2e-20
CCG001934	8244.25	1.86742	0.254794	7.32915	2.32e-13	1.8e-12
CCG001936	5773.54	1.83459	0.2911	6.30227	2.93e-10	1.79e-09
CCG001937	4944.87	1.88122	0.223172	8.42947	3.47e-17	3.46e-16
CCG001939	4953.15	1.74458	0.231925	7.52219	5.39e-14	4.37e-13
CCG001958	5194.92	-1.52145	0.134172	-11.3395	8.36e-30	1.52e-28
CCG001961	1039.04	-1.91616	0.205334	-9.33192	1.04e-20	1.25e-19
CCG001962	6862.41	1.06381	0.179413	5.92938	3.04e-09	1.7e-08
CCG001963	377.36	3.14605	0.255505	12.3131	7.7e-35	1.75e-33
CCG001971	433.261	1.22067	0.398199	3.06547	0.00217327	0.00562802
CCG001988	93.3467	3.23945	0.5703	5.68025	1.34e-08	7.06e-08
CCG001992	74.2319	-1.68659	0.426397	-3.95544	7.64e-05	0.000255493
CCG001993	67.324	-2.24979	0.501635	-4.48492	7.29e-06	2.82e-05
CCG001996	4525.21	1.5174	0.166585	9.10884	8.33e-20	9.55e-19
CCG001999	203.793	-1.37072	0.285572	-4.79991	1.59e-06	6.68e-06
CCG002002	998.066	-1.37343	0.238792	-5.75157	8.84e-09	4.72e-08
CCG002003	161.045	-1.60209	0.3129	-5.12012	3.05e-07	1.39e-06
CCG002009	49.127	2.01831	0.574749	3.51165	0.000445342	0.0013116
CCG002011	18662.9	3.4249	0.249252	13.7407	5.79e-43	1.81e-41
CCG002013	721.382	1.17907	0.236779	4.97961	6.37e-07	2.8e-06
CCG002017	218.821	4.0198	0.413986	9.71	2.73e-22	3.53e-21
CCG002019	7.45902	6.60047	1.93532	3.41054	0.000648342	0.00185729
CCG002023	5899.93	2.76915	0.133151	20.7971	4.59e-96	5.77e-94
CCG002039	614.684	1.37739	0.218638	6.29984	2.98e-10	1.82e-09
CCG002044	2394.45	1.57409	0.148926	10.5696	4.12e-26	6.41e-25
CCG002045	100.938	-1.32972	0.414812	-3.2056	0.00134783	0.00363614
CCG002047	86.691	1.39794	0.437055	3.19855	0.00138122	0.00371855
CCG002048	3617.74	1.42861	0.257542	5.54708	2.9e-08	1.47e-07
CCG002050	978.919	-1.04135	0.215521	-4.83176	1.35e-06	5.74e-06
CCG002064	49.0942	3.75911	0.636109	5.90955	3.43e-09	1.9e-08
CCG002071	318.65	2.47369	0.319869	7.73345	1.05e-14	8.94e-14
CCG002072	103.371	4.11063	0.456673	9.00125	2.23e-19	2.5e-18
CCG002076	4375.66	1.07442	0.150577	7.13537	9.65e-13	7.19e-12
CCG002110	638.885	1.16182	0.249792	4.65115	3.3e-06	1.34e-05
CCG002113	2126.17	-2.27215	0.155724	-14.5909	3.21e-48	1.17e-46
CCG002122	3053.1	3.50071	0.159061	22.0085	2.39e-107	3.99e-105
CCG002128	533.628	1.03521	0.199366	5.1925	2.07e-07	9.64e-07
CCG002129	787.534	2.84709	0.197868	14.3888	6.08e-47	2.12e-45
CCG002137	444.749	2.65475	0.289856	9.15883	5.25e-20	6.07e-19
CCG002154	59.579	-1.36174	0.462344	-2.9453	0.00322644	0.00804872
CCG002155	48.9596	-2.12955	0.596832	-3.56809	0.000359588	0.0010792
CCG002161	21.2286	-2.60737	0.830259	-3.14043	0.00168698	0.004474
CCG002171	754.339	6.76131	0.324365	20.8448	1.7e-96	2.16e-94
CCG002177	1430.82	1.14048	0.157589	7.23707	4.58e-13	3.49e-12
CCG002178	700.632	-1.29697	0.181037	-7.16412	7.83e-13	5.87e-12
CCG002182	2968.49	1.95067	0.151954	12.8372	1.01e-37	2.57e-36
CCG002185	13478	1.14736	0.223767	5.12745	2.94e-07	1.34e-06
CCG002191	331.841	1.47218	0.269817	5.45619	4.86e-08	2.41e-07
CCG002264	2736.24	-1.11563	0.141508	-7.88386	3.17e-15	2.82e-14
CCG002269	1372.95	-1.21075	0.215845	-5.60936	2.03e-08	1.05e-07
CCG002270	10.2668	-5.05851	1.75968	-2.87468	0.00404443	0.00988189
CCG002271	892.016	-1.24273	0.172586	-7.20065	5.99e-13	4.52e-12
CCG002277	7156.82	2.06028	0.260996	7.89391	2.93e-15	2.61e-14
CCG002279	3040.18	1.24006	0.161684	7.6697	1.72e-14	1.44e-13
CCG002280	149.737	1.2836	0.322657	3.97823	6.94e-05	0.000233611
CCG002281	8420.9	1.03482	0.143281	7.22234	5.11e-13	3.88e-12
CCG002284	27.8548	2.53213	0.751765	3.36825	0.000756458	0.00214489
CCG002285	103.03	4.00691	0.436764	9.17408	4.55e-20	5.29e-19
CCG002287	1592.39	1.10257	0.150457	7.32814	2.33e-13	1.81e-12
CCG002288	2492.18	-1.55218	0.161355	-9.61967	6.6e-22	8.41e-21
CCG002292	9289.39	-1.02219	0.131096	-7.79724	6.33e-15	5.5e-14
CCG002295	990.512	-1.78457	0.177143	-10.0742	7.18e-24	9.95e-23
CCG002299	1529.31	-2.40836	0.271887	-8.85795	8.15e-19	8.92e-18
CCG002318	38.2849	1.66163	0.557906	2.97833	0.00289821	0.00730286
CCG002319	2536.29	1.73662	0.205552	8.44855	2.95e-17	2.96e-16
CCG002320	2287.97	-1.13519	0.144304	-7.8667	3.64e-15	3.21e-14
CCG002321	1106.61	-1.68871	0.207282	-8.14695	3.73e-16	3.5e-15
CCG002329	114.241	2.67226	0.365246	7.31633	2.55e-13	1.97e-12
CCG002339	1118.25	1.90096	0.204996	9.27316	1.81e-20	2.14e-19
CCG002348	1000.63	-2.93595	0.185597	-15.819	2.3e-56	1.08e-54
CCG002349	3530.74	2.3402	0.197435	11.853	2.08e-32	4.2e-31
CCG002354	314.24	3.82203	0.287167	13.3094	2.04e-40	5.81e-39
CCG002357	34.9968	3.13109	0.685418	4.56814	4.92e-06	1.95e-05
CCG002361	2227.28	-1.01896	0.20154	-5.05584	4.29e-07	1.92e-06
CCG002364	1356.06	-1.4828	0.156312	-9.48616	2.4e-21	2.96e-20
CCG002365	683.564	1.19665	0.195133	6.13251	8.65e-10	5.08e-09
CCG002370	569.168	-1.27706	0.211403	-6.04087	1.53e-09	8.79e-09
CCG002396	6886.54	2.37366	0.130802	18.1469	1.36e-73	1e-71
CCG002404	4167.05	1.21454	0.166996	7.27286	3.52e-13	2.71e-12
CCG002406	1499.52	-1.27507	0.1652	-7.71834	1.18e-14	1e-13
CCG002421	22.4704	-3.49467	1.09853	-3.18124	0.00146648	0.00392954
CCG002423	44.4962	2.98674	0.594843	5.02106	5.14e-07	2.28e-06
CCG002427	689.096	-2.19855	0.186871	-11.7651	5.91e-32	1.18e-30
CCG002431	1647.62	-1.62651	0.18632	-8.72967	2.55e-18	2.72e-17
CCG002438	1202.54	1.13004	0.184633	6.12048	9.33e-10	5.47e-09
CCG002442	536.893	-1.45904	0.201144	-7.25367	4.06e-13	3.11e-12
CCG002443	58.9482	-4.39004	0.678217	-6.47291	9.61e-11	6.11e-10
CCG002455	3588.07	1.34059	0.169907	7.89016	3.02e-15	2.68e-14
CCG002474	105.789	2.04037	0.510281	3.99852	6.37e-05	0.000215438
CCG002476	28.5135	-2.43217	0.697881	-3.48508	0.000491981	0.00143782
CCG002477	712.527	-1.0744	0.18388	-5.84297	5.13e-09	2.8e-08
CCG002482	3150.68	1.5236	0.140018	10.8814	1.41e-27	2.35e-26
CCG002485	1582.71	1.45353	0.149129	9.74678	1.9e-22	2.47e-21
CCG002492	2122.71	1.44685	0.167521	8.63686	5.78e-18	6.04e-17
CCG002493	14255.4	2.24045	0.214433	10.4483	1.49e-25	2.25e-24
CCG002498	128.039	-1.76206	0.332204	-5.30413	1.13e-07	5.43e-07
CCG002507	646.078	-2.87442	0.245076	-11.7287	9.09e-32	1.78e-30
CCG002509	37.222	6.44444	1.2678	5.08315	3.71e-07	1.68e-06
CCG002514	14.5763	4.48591	1.18736	3.77805	0.000158059	0.000503176
CCG002517	540.16	-1.13711	0.242915	-4.68109	2.85e-06	1.17e-05
CCG002521	217.558	1.53882	0.305309	5.0402	4.65e-07	2.08e-06
CCG002522	479.628	1.26148	0.256846	4.91143	9.04e-07	3.91e-06
CCG002524	854.867	-2.28951	0.246296	-9.29575	1.46e-20	1.74e-19
CCG002527	616.844	-1.15681	0.257504	-4.4924	7.04e-06	2.73e-05
CCG002536	2927.94	-5.31189	0.178599	-29.742	2.2e-194	2.57e-191
CCG002537	264.63	-3.6184	0.321146	-11.2671	1.91e-29	3.42e-28
CCG002538	1247.6	9.08156	0.541949	16.7572	5.02e-63	2.82e-61
CCG002544	166.152	-1.26923	0.313143	-4.0532	5.05e-05	0.000173244
CCG002547	12716.4	1.08821	0.129266	8.41838	3.82e-17	3.79e-16
CCG002555	1405.73	-4.16048	0.216107	-19.252	1.36e-82	1.27e-80
CCG002567	594.462	-1.04609	0.188328	-5.55461	2.78e-08	1.41e-07
CCG002568	11111.7	1.94246	0.132028	14.7124	5.36e-49	2.02e-47
CCG002570	41495.4	1.39076	0.127964	10.8684	1.63e-27	2.69e-26
CCG002580	119243	1.99306	0.129255	15.4196	1.21e-53	5.27e-52
CCG002596	2216.65	1.87889	0.181469	10.3538	4.02e-25	5.94e-24
CCG002611	86.3136	-2.77549	0.442527	-6.27192	3.57e-10	2.16e-09
CCG002612	877.179	1.76536	0.296254	5.95896	2.54e-09	1.42e-08
CCG002616	158.676	-1.45099	0.300748	-4.82461	1.4e-06	5.94e-06
CCG002617	750.896	-2.53287	0.188706	-13.4223	4.47e-41	1.31e-39
CCG002618	48.1754	-2.27314	0.57825	-3.93107	8.46e-05	0.000280718
CCG002623	13.0348	3.8681	1.13197	3.41715	0.000632811	0.00181584
CCG002637	12101.7	3.02461	0.131783	22.9514	1.43e-116	3.05e-114
CCG002640	3924.99	1.00415	0.192604	5.21356	1.85e-07	8.65e-07
CCG002648	3100.62	1.20219	0.150522	7.9868	1.38e-15	1.26e-14
CCG002657	3732.73	2.15497	0.14303	15.0666	2.69e-51	1.09e-49
CCG002660	2026.02	1.28644	0.209792	6.132	8.68e-10	5.1e-09
CCG002661	1824.34	1.50037	0.219445	6.8371	8.08e-12	5.6e-11
CCG002665	136.489	-1.46865	0.332772	-4.41338	1.02e-05	3.86e-05
CCG002669	35014	-1.02967	0.161051	-6.39343	1.62e-10	1.01e-09
CCG002671	166.342	1.45918	0.315116	4.63063	3.65e-06	1.47e-05
CCG002677	9903.65	2.68685	0.20212	13.2934	2.53e-40	7.2e-39
CCG002679	125.867	1.03194	0.347494	2.96968	0.00298114	0.00748974
CCG002680	424.424	-1.08297	0.204472	-5.29642	1.18e-07	5.65e-07
CCG002694	568.273	1.1849	0.277118	4.2758	1.9e-05	6.94e-05
CCG002704	66.7874	1.32308	0.436772	3.02923	0.00245181	0.00628706
CCG002707	1250.47	-4.94843	0.348752	-14.189	1.07e-45	3.63e-44
CCG002709	485.396	-1.65725	0.208922	-7.93239	2.15e-15	1.93e-14
CCG002711	139.855	2.7832	0.331689	8.391	4.82e-17	4.77e-16
CCG002713	1532.58	-1.17948	0.153788	-7.66955	1.73e-14	1.45e-13
CCG002715	1420.73	1.13276	0.162372	6.97634	3.03e-12	2.17e-11
CCG002728	38.9802	-4.6592	0.83969	-5.54872	2.88e-08	1.46e-07
CCG002729	15.7256	5.19487	1.32357	3.92489	8.68e-05	0.000287385
CCG002733	2981.2	-2.25389	0.234468	-9.61277	7.06e-22	8.97e-21
CCG002739	76.259	-1.38234	0.41556	-3.32645	0.000879593	0.00246386
CCG002740	346.441	-1.32745	0.249954	-5.31081	1.09e-07	5.24e-07
CCG002743	215.063	-1.18837	0.282571	-4.20556	2.6e-05	9.3e-05
CCG002757	2097.49	1.88577	0.656475	2.87257	0.00407144	0.00994023
CCG002759	5101.64	2.41565	0.170915	14.1337	2.36e-45	7.91e-44
CCG002767	466.917	2.58111	0.259405	9.95012	2.52e-23	3.41e-22
CCG002774	1096.05	-1.08277	0.208413	-5.19533	2.04e-07	9.5e-07
CCG002790	2335.61	-1.10793	0.187754	-5.90099	3.61e-09	2e-08
CCG002796	5324.94	2.94481	0.192874	15.2681	1.25e-52	5.3e-51
CCG002797	154.986	5.26027	0.469653	11.2003	4.06e-29	7.2e-28
CCG002804	190.08	-2.35043	0.36585	-6.42455	1.32e-10	8.33e-10
CCG002805	2099.21	1.63614	0.156902	10.4278	1.85e-25	2.77e-24
CCG002819	437.025	1.17503	0.250732	4.6864	2.78e-06	1.14e-05
CCG002823	38.121	2.09146	0.705234	2.96563	0.00302064	0.00757956
CCG002825	3319.67	1.36751	0.200291	6.82763	8.63e-12	5.96e-11
CCG002830	16.957	-4.79999	1.32202	-3.63081	0.000282537	0.000862863
CCG002833	364.56	2.08097	0.226616	9.1828	4.2e-20	4.89e-19
CCG002841	431.989	-2.86826	0.253777	-11.3023	1.28e-29	2.31e-28
CCG002850	429.101	2.13958	0.360416	5.93644	2.91e-09	1.63e-08
CCG002851	395.846	1.46239	0.242874	6.02116	1.73e-09	9.89e-09
CCG002853	843.094	-2.49774	0.230564	-10.8332	2.4e-27	3.93e-26
CCG002859	1224.48	-1.00223	0.188608	-5.31383	1.07e-07	5.16e-07
CCG002864	9238.55	2.19525	0.13303	16.5019	3.55e-61	1.88e-59
CCG002865	1195.37	2.24849	0.161022	13.9639	2.59e-44	8.41e-43
CCG002866	119.543	2.24591	0.353927	6.34567	2.21e-10	1.36e-09
CCG002867	1363.12	2.17198	0.157369	13.8018	2.48e-43	7.85e-42
CCG002872	1582.48	1.35288	0.211385	6.40005	1.55e-10	9.72e-10
CCG002874	155.164	-1.49402	0.304005	-4.91447	8.9e-07	3.85e-06
CCG002877	4292.22	1.99863	0.172383	11.5941	4.41e-31	8.46e-30
CCG002894	1569.1	6.40003	0.333817	19.1723	6.31e-82	5.68e-80
CCG002895	759.541	5.37311	0.324144	16.5763	1.03e-61	5.59e-60
CCG002896	797.281	5.90373	0.353578	16.6971	1.38e-62	7.66e-61
CCG002897	464.698	6.54681	0.90699	7.21817	5.27e-13	4e-12
CCG002898	370.977	5.61747	0.459518	12.2247	2.29e-34	5.09e-33
CCG002899	129.636	5.34052	0.561016	9.51936	1.74e-21	2.17e-20
CCG002908	19250.9	1.45019	0.169423	8.55954	1.13e-17	1.16e-16
CCG002913	1192.56	-1.4388	0.204296	-7.04272	1.89e-12	1.37e-11
CCG002922	22.5858	3.26595	0.899151	3.63227	0.000280944	0.000858237
CCG002923	157.263	2.74705	0.349125	7.86839	3.59e-15	3.17e-14
CCG002925	23.4695	-2.35164	0.766446	-3.06824	0.00215323	0.00558327
CCG002928	1983.23	-2.97402	0.227127	-13.0941	3.56e-39	9.62e-38
CCG002935	438.139	1.86238	0.232768	8.00103	1.23e-15	1.12e-14
CCG002936	5702.88	1.17404	0.164358	7.14319	9.12e-13	6.82e-12
CCG002937	1084.68	-1.46962	0.262052	-5.60813	2.05e-08	1.06e-07
CCG002942	144.043	1.421	0.388261	3.6599	0.000252309	0.000777818
CCG002944	38.6985	2.64987	0.743785	3.56268	0.000367092	0.00110009
CCG002949	1100.72	1.83744	0.213043	8.62473	6.42e-18	6.7e-17
CCG002956	957.513	-1.18145	0.16533	-7.14602	8.93e-13	6.68e-12
CCG002980	1236.3	3.19608	0.215393	14.8384	8.27e-50	3.21e-48
CCG002981	568.895	3.28818	0.213417	15.4073	1.46e-53	6.34e-52
CCG002982	1129.22	4.8644	0.230345	21.1179	5.45e-99	7.39e-97
CCG002988	1716.01	1.15152	0.161961	7.10987	1.16e-12	8.6e-12
CCG002992	1364.6	2.05626	0.200384	10.2616	1.05e-24	1.51e-23
CCG003006	2237.19	-3.48179	0.196228	-17.7436	1.93e-70	1.29e-68
CCG003007	1466.08	3.94896	0.190703	20.7074	2.97e-95	3.57e-93
CCG003008	18075.2	3.94522	0.154421	25.5484	5.72e-144	2.23e-141
CCG003009	14699.7	-1.42695	0.168755	-8.45574	2.77e-17	2.79e-16
CCG003028	209.197	-2.21039	0.422365	-5.23338	1.66e-07	7.81e-07
CCG003033	3239.62	-3.02652	0.155006	-19.5252	6.71e-85	6.46e-83
CCG003038	1354.71	-3.12961	0.200303	-15.6244	4.97e-55	2.23e-53
CCG003044	212.84	-1.97745	0.503751	-3.92545	8.66e-05	0.000286804
CCG003045	3601.42	1.18388	0.169817	6.9715	3.14e-12	2.24e-11
CCG003046	644.287	-1.22732	0.1902	-6.45278	1.1e-10	6.95e-10
CCG003049	18.7535	-4.32905	1.18324	-3.65864	0.000253562	0.000781247
CCG003065	2226.24	1.40648	0.204166	6.88891	5.62e-12	3.94e-11
CCG003066	632.634	1.57626	0.184641	8.53689	1.38e-17	1.41e-16
CCG003069	530.766	2.06954	0.336614	6.14811	7.84e-10	4.63e-09
CCG003072	1183.25	-1.06277	0.208764	-5.09079	3.57e-07	1.61e-06
CCG003073	122.384	-1.21116	0.331284	-3.65597	0.000256211	0.000787989
CCG003077	6019.2	3.83398	0.155854	24.5997	1.27e-133	3.87e-131
CCG003080	103.708	1.76161	0.39966	4.40778	1.04e-05	3.96e-05
CCG003089	260.804	-1.44742	0.259498	-5.57778	2.44e-08	1.25e-07
CCG003098	6490.48	1.65264	0.163876	10.0847	6.46e-24	8.96e-23
CCG003101	162.683	-3.08645	0.360382	-8.56438	1.09e-17	1.12e-16
CCG003114	8975.63	2.12504	0.208034	10.2149	1.7e-24	2.42e-23
CCG003118	682.708	-1.33204	0.23768	-5.60436	2.09e-08	1.08e-07
CCG003119	3402.11	1.06723	0.188991	5.647	1.63e-08	8.48e-08
CCG003121	1009.88	4.01846	0.184827	21.7417	8.27e-105	1.27e-102
CCG003126	455.803	-1.85428	0.24349	-7.61543	2.63e-14	2.17e-13
CCG003129	15288.5	-2.09669	0.18628	-11.2556	2.17e-29	3.89e-28
CCG003130	532.358	-1.48412	0.231608	-6.40788	1.48e-10	9.25e-10
CCG003131	548.302	2.30995	0.2157	10.7091	9.23e-27	1.48e-25
CCG003141	80.6854	-1.67708	0.419909	-3.99392	6.5e-05	0.000219402
CCG003142	886.605	-6.02557	0.28623	-21.0515	2.22e-98	2.93e-96
CCG003148	4614.87	1.30131	0.165306	7.8721	3.49e-15	3.08e-14
CCG003149	99.3748	2.76311	0.398569	6.93257	4.13e-12	2.93e-11
CCG003158	21.4826	-2.82478	0.847217	-3.33419	0.00085549	0.00240452
CCG003160	2445.5	-1.64339	0.161263	-10.1907	2.18e-24	3.1e-23
CCG003169	7506.61	2.79176	0.183394	15.2228	2.5e-52	1.04e-50
CCG003174	197.758	2.57886	0.528571	4.87892	1.07e-06	4.57e-06
CCG003179	748.998	1.03971	0.224279	4.63579	3.56e-06	1.43e-05
CCG003192	498.807	-1.2441	0.239922	-5.18541	2.16e-07	9.99e-07
CCG003197	615.333	5.01853	0.251155	19.9818	7.93e-89	8.31e-87
CCG003198	403.2	2.41349	0.224643	10.7437	6.35e-27	1.02e-25
CCG003199	1002.81	-1.92509	0.181999	-10.5774	3.79e-26	5.91e-25
CCG003204	3707.35	-2.3951	0.164171	-14.5891	3.3e-48	1.2e-46
CCG003205	3614.82	-2.14342	0.158013	-13.5649	6.47e-42	1.95e-40
CCG003217	3206.95	1.36444	0.164858	8.27646	1.27e-16	1.22e-15
CCG003227	1036.72	-1.71376	0.200461	-8.54911	1.24e-17	1.27e-16
CCG003241	185.668	1.80981	0.282532	6.40569	1.5e-10	9.39e-10
CCG003247	1347.3	-1.10819	0.197305	-5.61663	1.95e-08	1.01e-07
CCG003248	2876.15	1.14997	0.265566	4.33027	1.49e-05	5.51e-05
CCG003249	1606.51	-1.37695	0.332142	-4.14567	3.39e-05	0.000119011
CCG003255	5191.23	1.02908	0.153265	6.71437	1.89e-11	1.27e-10
CCG003258	88.0011	3.77336	0.490098	7.69919	1.37e-14	1.16e-13
CCG003261	304.135	1.3279	0.238826	5.56012	2.7e-08	1.37e-07
CCG003265	866.751	-1.46894	0.190574	-7.708	1.28e-14	1.08e-13
CCG003290	118.577	1.26867	0.330443	3.83931	0.00012338	0.000400346
CCG003298	290.485	1.56274	0.240119	6.50819	7.61e-11	4.87e-10
CCG003301	4623.23	2.19753	0.140406	15.6513	3.26e-55	1.48e-53
CCG003311	340.27	1.3791	0.270378	5.10064	3.39e-07	1.54e-06
CCG003314	5187.77	1.80678	0.184117	9.81322	9.88e-23	1.3e-21
CCG003317	286.556	-1.11212	0.291812	-3.8111	0.000138351	0.000445542
CCG003319	2624.58	-1.35716	0.16534	-8.20829	2.24e-16	2.12e-15
CCG003320	555.12	-1.44126	0.192345	-7.49312	6.73e-14	5.41e-13
CCG003344	3014.89	-1.40966	0.17508	-8.05152	8.18e-16	7.52e-15
CCG003347	55.3983	-1.84742	0.567437	-3.25572	0.00113105	0.00309718
CCG003348	874.663	-2.18378	0.196663	-11.1042	1.2e-28	2.07e-27
CCG003349	8574.81	-2.30981	0.145529	-15.8718	9.94e-57	4.71e-55
CCG003351	974.625	-1.24278	0.185046	-6.71607	1.87e-11	1.26e-10
CCG003357	8726.83	2.01083	0.148547	13.5366	9.51e-42	2.84e-40
CCG003359	52.6223	2.31898	0.709267	3.26955	0.00107719	0.00296065
CCG003366	231.378	1.57787	0.48133	3.27815	0.00104491	0.00288224
CCG003371	260.202	-1.21397	0.250084	-4.85425	1.21e-06	5.14e-06
CCG003372	150.046	-1.05936	0.33973	-3.11824	0.00181935	0.00478734
CCG003382	801.824	3.04632	0.251288	12.1228	8e-34	1.74e-32
CCG003391	9335.84	1.22984	0.143503	8.57015	1.03e-17	1.06e-16
CCG003394	50.683	-1.89699	0.571189	-3.32112	0.000896565	0.00250792
CCG003414	567.184	-1.71468	0.207377	-8.26839	1.36e-16	1.31e-15
CCG003418	125.167	-1.09299	0.340959	-3.20563	0.00134767	0.00363614
CCG003419	1908.26	1.50824	0.145714	10.3507	4.16e-25	6.12e-24
CCG003450	1533.57	-1.54048	0.169522	-9.08722	1.02e-19	1.16e-18
CCG003454	5839.02	3.96565	0.242907	16.3258	6.47e-60	3.34e-58
CCG003461	896.134	-3.35025	0.212962	-15.7317	9.18e-56	4.2e-54
CCG003467	122.067	-2.04381	0.514909	-3.96925	7.21e-05	0.000241963
CCG003472	262.199	1.56634	0.294838	5.31255	1.08e-07	5.19e-07
CCG003483	45.9973	-4.61621	0.826203	-5.58725	2.31e-08	1.18e-07
CCG003486	1892.16	-1.32098	0.157674	-8.37792	5.39e-17	5.31e-16
CCG003491	6309.2	-1.41678	0.133027	-10.6503	1.74e-26	2.75e-25
CCG003497	6470.19	1.59526	0.150369	10.609	2.71e-26	4.25e-25
CCG003510	1981.22	1.84149	0.199154	9.2466	2.32e-20	2.73e-19
CCG003511	45143.1	2.2597	0.189164	11.9458	6.83e-33	1.42e-31
CCG003523	17.0312	-3.11915	1.02248	-3.05056	0.00228413	0.00589383
CCG003540	107.413	-2.94073	0.557691	-5.27305	1.34e-07	6.38e-07
CCG003555	384.504	-1.38835	0.215887	-6.4309	1.27e-10	8e-10
CCG003596	397.236	-1.01667	0.278178	-3.65475	0.000257437	0.000791324
CCG003597	1867.24	1.82202	0.198914	9.15988	5.2e-20	6.02e-19
CCG003599	2730.54	-1.16661	0.198519	-5.8766	4.19e-09	2.3e-08
CCG003601	85.709	2.34104	0.536831	4.36085	1.3e-05	4.85e-05
CCG003604	286.988	-1.65667	0.277333	-5.97359	2.32e-09	1.31e-08
CCG003618	3135.7	-2.18378	0.214488	-10.1813	2.4e-24	3.4e-23
CCG003620	1194.3	-1.43729	0.219296	-6.55412	5.6e-11	3.62e-10
CCG003625	908.263	2.64493	0.177024	14.9411	1.78e-50	7.02e-49
CCG003629	1343.99	-2.56676	0.200176	-12.8225	1.23e-37	3.1e-36
CCG003632	2684.71	1.51153	0.319781	4.72676	2.28e-06	9.43e-06
CCG003633	254.193	-1.42227	0.366553	-3.88012	0.000104403	0.000342317
CCG003642	896.893	2.50093	0.216818	11.5347	8.82e-31	1.67e-29
CCG003643	3769.04	2.149	0.20768	10.3476	4.29e-25	6.31e-24
CCG003644	20170.7	-1.86314	0.145661	-12.791	1.84e-37	4.62e-36
CCG003648	504.382	2.79378	0.209844	13.3136	1.93e-40	5.51e-39
CCG003651	112.67	-1.20925	0.382266	-3.16336	0.00155957	0.00416143
CCG003653	928.928	-1.35995	0.186228	-7.30262	2.82e-13	2.18e-12
CCG003662	870.957	-1.14934	0.270567	-4.24791	2.16e-05	7.8e-05
CCG003664	474.839	-1.19489	0.213675	-5.59207	2.24e-08	1.15e-07
CCG003682	438.209	-1.39552	0.211783	-6.58935	4.42e-11	2.89e-10
CCG003683	281.947	-1.76242	0.270438	-6.51692	7.18e-11	4.61e-10
CCG003688	32.8988	-2.56846	0.660138	-3.89079	9.99e-05	0.00032844
CCG003697	1643.01	1.32571	0.170077	7.79476	6.45e-15	5.6e-14
CCG003700	1626.67	-1.01127	0.159404	-6.34408	2.24e-10	1.38e-09
CCG003703	128.894	-1.38833	0.383443	-3.62071	0.000293799	0.000894191
CCG003710	846.121	3.90702	0.785593	4.97334	6.58e-07	2.89e-06
CCG003711	111.763	-1.55816	0.380614	-4.09381	4.24e-05	0.000147028
CCG003715	4803.87	3.15626	0.14287	22.0919	3.79e-108	6.47e-106
CCG003724	9683.6	1.99	0.220123	9.0404	1.56e-19	1.76e-18
CCG003731	16961.3	1.35771	0.26879	5.05119	4.39e-07	1.97e-06
CCG003744	652.266	-1.35007	0.274012	-4.92703	8.35e-07	3.63e-06
CCG003754	152.831	2.06284	0.347441	5.93723	2.9e-09	1.62e-08
CCG003755	32.815	2.33958	0.648115	3.60981	0.000306418	0.000928655
CCG003761	493.96	-2.17966	0.29197	-7.46536	8.31e-14	6.65e-13
CCG003762	2919.64	-1.09336	0.155558	-7.02861	2.09e-12	1.51e-11
CCG003774	6.81107	6.4704	1.97692	3.27297	0.00106424	0.00293012
CCG003794	335.926	1.59799	0.236003	6.77105	1.28e-11	8.69e-11
CCG003798	4260.74	-1.50721	0.195402	-7.71337	1.23e-14	1.04e-13
CCG003809	601.619	-2.42688	0.208771	-11.6246	3.09e-31	5.95e-30
CCG003814	9477.78	1.21685	0.143228	8.49586	1.96e-17	1.99e-16
CCG003819	21.5379	-4.5376	1.10826	-4.09435	4.23e-05	0.000146756
CCG003821	13174.1	-1.70519	0.263369	-6.47453	9.51e-11	6.05e-10
CCG003823	485.189	1.41424	0.300809	4.70147	2.58e-06	1.06e-05
CCG003838	465.876	-1.31759	0.233315	-5.64727	1.63e-08	8.47e-08
CCG003845	856.719	-2.20005	0.23969	-9.17874	4.36e-20	5.08e-19
CCG003847	1620.68	1.25701	0.177408	7.0854	1.39e-12	1.02e-11
CCG003853	270.997	1.32586	0.24378	5.43876	5.37e-08	2.65e-07
CCG003857	606.378	-1.06997	0.207313	-5.16112	2.45e-07	1.13e-06
CCG003875	2768.84	1.0378	0.145304	7.14224	9.18e-13	6.86e-12
CCG003876	1720.67	1.00506	0.148353	6.77479	1.25e-11	8.47e-11
CCG003881	47.9873	-2.06621	0.635798	-3.24979	0.0011549	0.003159
CCG003888	2195.28	1.04269	0.297494	3.50492	0.000456743	0.0013425
CCG003889	1348.78	1.89697	0.161375	11.7551	6.65e-32	1.32e-30
CCG003890	4103.93	2.72173	0.146038	18.6372	1.61e-77	1.3e-75
CCG003892	2384.79	-2.12961	0.150894	-14.1133	3.15e-45	1.05e-43
CCG003893	7185.87	2.78078	0.161056	17.2659	8.5e-67	5.23e-65
CCG003906	73.3623	5.10938	0.690886	7.3954	1.41e-13	1.11e-12
CCG003907	1974.46	1.71474	0.182753	9.38282	6.42e-21	7.79e-20
CCG003909	65.1792	4.28474	0.639198	6.7033	2.04e-11	1.37e-10
CCG003910	9.07609	5.39901	1.80543	2.99043	0.00278582	0.00705164
CCG003911	6833.13	2.26871	0.21676	10.4665	1.23e-25	1.87e-24
CCG003912	157.883	-1.32591	0.366747	-3.61532	0.000299979	0.000910631
CCG003914	29.1226	-4.55179	0.980265	-4.64343	3.43e-06	1.39e-05
CCG003915	205.851	-1.93371	0.321943	-6.00637	1.9e-09	1.08e-08
CCG003916	173.196	-2.65762	0.359651	-7.38944	1.47e-13	1.16e-12
CCG003918	616.178	-2.06821	0.198585	-10.4147	2.12e-25	3.17e-24
CCG003919	1954.39	1.2368	0.186457	6.63317	3.29e-11	2.17e-10
CCG003923	2266.6	1.99282	0.264266	7.54097	4.66e-14	3.8e-13
CCG003925	24137.5	2.95973	0.137535	21.5198	1.02e-102	1.47e-100
CCG003929	38486.2	-1.31055	0.128187	-10.2238	1.55e-24	2.21e-23
CCG003932	1793.84	-1.96189	0.150144	-13.0668	5.1e-39	1.37e-37
CCG003934	720.702	4.79192	0.276154	17.3524	1.89e-67	1.19e-65
CCG003938	1196.01	-5.56515	0.240991	-23.0927	5.48e-118	1.24e-115
CCG003940	6547.91	1.23545	0.136294	9.06461	1.25e-19	1.42e-18
CCG003942	42.2795	3.1887	0.593501	5.37269	7.76e-08	3.78e-07
CCG003944	4771.73	2.08051	0.178464	11.6579	2.09e-31	4.07e-30
CCG003945	51952.1	1.5232	0.155821	9.77531	1.44e-22	1.88e-21
CCG003947	159.179	-1.36973	0.313647	-4.36709	1.26e-05	4.72e-05
CCG003950	67.5517	-1.60549	0.445217	-3.60608	0.000310858	0.000941342
CCG003955	937.279	-1.13242	0.224119	-5.05278	4.35e-07	1.95e-06
CCG003960	20333.8	2.16145	0.17287	12.5033	7.16e-36	1.69e-34
CCG003963	179.886	-1.02785	0.279504	-3.6774	0.000235626	0.000729525
CCG003965	3291.04	1.41224	0.186694	7.56444	3.9e-14	3.18e-13
CCG003967	5324.27	1.17347	0.149546	7.84692	4.26e-15	3.74e-14
CCG003975	40.3535	3.4698	0.631012	5.49878	3.82e-08	1.91e-07
CCG003989	255.72	3.37616	0.283734	11.899	1.2e-32	2.46e-31
CCG003997	5849.7	2.39131	0.1898	12.5991	2.14e-36	5.11e-35
CCG003999	177.373	-1.47185	0.324071	-4.54175	5.58e-06	2.19e-05
CCG004000	169.749	-1.20358	0.333926	-3.60435	0.000312939	0.000947125
CCG004005	165.155	1.0864	0.327948	3.31271	0.000923982	0.0025777
CCG004011	1047.97	1.61784	0.207386	7.80109	6.14e-15	5.34e-14
CCG004015	461.88	-1.18008	0.271414	-4.3479	1.37e-05	5.11e-05
CCG004029	1043.51	4.62721	0.223343	20.7179	2.39e-95	2.88e-93
CCG004037	1763.35	4.45016	0.18055	24.6478	3.89e-134	1.2e-131
CCG004038	9769.96	4.93572	0.202165	24.4143	1.21e-131	3.62e-129
CCG004039	8936.79	1.26617	0.14949	8.46996	2.45e-17	2.47e-16
CCG004055	1485.57	2.13904	0.162854	13.1346	2.08e-39	5.69e-38
CCG004057	1479.43	2.07301	0.19601	10.576	3.85e-26	5.99e-25
CCG004058	22765.6	-1.01722	0.159439	-6.38002	1.77e-10	1.1e-09
CCG004060	634.002	-1.36928	0.295781	-4.62937	3.67e-06	1.48e-05
CCG004066	820.653	-2.89132	0.184385	-15.6809	2.04e-55	9.3e-54
CCG004080	18.2651	-7.38185	1.65853	-4.45084	8.55e-06	3.28e-05
CCG004090	31.7676	2.65395	0.659716	4.02286	5.75e-05	0.000195555
CCG004092	177.57	2.35641	0.291511	8.08343	6.3e-16	5.83e-15
CCG004093	68.4815	2.93763	0.647915	4.53397	5.79e-06	2.27e-05
CCG004097	2106.88	-1.63431	0.165746	-9.86034	6.18e-23	8.23e-22
CCG004123	1010.15	-3.85786	0.246576	-15.6457	3.55e-55	1.61e-53
CCG004124	3446.14	3.09549	0.253746	12.1992	3.14e-34	6.94e-33
CCG004125	1939.98	3.33708	0.323532	10.3145	6.06e-25	8.82e-24
CCG004126	128.361	3.04347	0.375805	8.09855	5.56e-16	5.17e-15
CCG004127	1074.56	-1.94325	0.189273	-10.2669	9.93e-25	1.43e-23
CCG004128	5647.86	1.00836	0.182867	5.51418	3.5e-08	1.76e-07
CCG004129	496.649	1.54976	0.198531	7.80615	5.9e-15	5.13e-14
CCG004131	13892.7	-1.32064	0.128462	-10.2804	8.64e-25	1.25e-23
CCG004133	2404.97	-1.49945	0.180974	-8.28545	1.18e-16	1.14e-15
CCG004139	24.9137	5.85995	1.23698	4.73731	2.17e-06	8.98e-06
CCG004147	1033.37	2.05489	0.204751	10.0361	1.06e-23	1.45e-22
CCG004150	1660.67	1.99081	0.159029	12.5185	5.91e-36	1.4e-34
CCG004152	38.1077	2.0327	0.612495	3.31873	0.000904279	0.00252848
CCG004170	942.98	-1.17485	0.240685	-4.88127	1.05e-06	4.52e-06
CCG004171	3348.36	1.68548	0.16592	10.1584	3.04e-24	4.28e-23
CCG004172	207.317	-4.07009	0.371047	-10.9692	5.37e-28	9.06e-27
CCG004176	125.975	-1.16806	0.336365	-3.4726	0.000515447	0.00150057
CCG004177	15615.8	1.11868	0.18169	6.1571	7.41e-10	4.38e-09
CCG004183	175.398	-1.11477	0.291487	-3.82441	0.000131083	0.000423671
CCG004193	210.016	1.2022	0.292458	4.11067	3.95e-05	0.000137464
CCG004205	15.391	-3.57681	1.07737	-3.31994	0.000900381	0.00251796
CCG004206	1524.34	-1.09767	0.161468	-6.79804	1.06e-11	7.26e-11
CCG004208	1300.27	4.16248	0.257452	16.168	8.48e-59	4.28e-57
CCG004211	1042.67	1.048	0.314671	3.33045	0.000867044	0.00243362
CCG004214	421.933	-1.69676	0.346581	-4.89572	9.79e-07	4.22e-06
CCG004215	648.146	-1.25227	0.194202	-6.44831	1.13e-10	7.15e-10
CCG004224	313.298	5.88696	0.374627	15.7142	1.21e-55	5.52e-54
CCG004226	775.247	1.7863	0.191654	9.32043	1.16e-20	1.39e-19
CCG004227	234.431	-1.72593	0.269173	-6.41195	1.44e-10	9.02e-10
CCG004236	7831.11	-1.04222	0.175135	-5.95094	2.67e-09	1.49e-08
CCG004240	230.92	-2.78864	0.300457	-9.28135	1.67e-20	1.99e-19
CCG004242	471.261	-1.38336	0.253298	-5.46142	4.72e-08	2.34e-07
CCG004243	8949.55	-1.28376	0.172106	-7.4591	8.71e-14	6.96e-13
CCG004245	177.722	6.11976	0.570802	10.7213	8.08e-27	1.3e-25
CCG004248	440.559	-1.21615	0.21007	-5.78925	7.07e-09	3.8e-08
CCG004250	134.292	3.8852	0.397869	9.76502	1.59e-22	2.08e-21
CCG004256	1570.54	2.71832	0.23326	11.6536	2.2e-31	4.27e-30
CCG004259	1563.22	1.80537	0.363285	4.96958	6.71e-07	2.94e-06
CCG004265	1792.45	-2.79079	0.276658	-10.0875	6.28e-24	8.73e-23
CCG004268	4563.98	1.1937	0.165081	7.23096	4.8e-13	3.65e-12
CCG004278	2207.13	1.54411	0.152838	10.103	5.36e-24	7.47e-23
CCG004280	3534.45	1.62824	0.134863	12.0733	1.46e-33	3.12e-32
CCG004286	55.9486	-1.75253	0.496587	-3.52915	0.000416897	0.00123585
CCG004295	27.4542	3.45052	0.829293	4.16079	3.17e-05	0.00011182
CCG004301	151.334	7.91639	0.901267	8.78362	1.58e-18	1.71e-17
CCG004333	24.3135	-7.79554	1.60574	-4.85481	1.21e-06	5.13e-06
CCG004346	100.731	2.16437	0.442086	4.89581	9.79e-07	4.22e-06
CCG004356	102.726	-1.475	0.390006	-3.78199	0.000155579	0.000496062
CCG004357	727.109	2.5095	0.220613	11.3751	5.56e-30	1.02e-28
CCG004358	3649.72	5.48939	0.170499	32.1961	2e-227	3.42e-224
CCG004360	1435.19	2.49013	0.217538	11.4469	2.44e-30	4.54e-29
CCG004361	70.2818	3.8368	0.512584	7.4852	7.14e-14	5.74e-13
CCG004364	5417.72	-4.11052	0.221106	-18.5907	3.82e-77	3.06e-75
CCG004366	447.781	-1.9069	0.290058	-6.5742	4.89e-11	3.18e-10
CCG004375	235.386	-2.55124	0.296204	-8.61311	7.11e-18	7.39e-17
CCG004388	395.737	1.30211	0.229697	5.66882	1.44e-08	7.52e-08
CCG004391	851.503	-1.90686	0.187704	-10.1589	3.03e-24	4.26e-23
CCG004407	113.703	-1.63688	0.369254	-4.43295	9.3e-06	3.55e-05
CCG004408	55.1778	-1.68865	0.490506	-3.44267	0.000576002	0.0016653
CCG004412	257.084	1.55105	0.276186	5.61595	1.95e-08	1.01e-07
CCG004417	9.09892	-6.37802	1.85457	-3.43908	0.000583694	0.00168578
CCG004429	297.588	-1.18251	0.321733	-3.67544	0.000237442	0.000734839
CCG004437	7471.06	3.24337	0.153652	21.1085	6.64e-99	8.95e-97
CCG004439	212.041	1.39654	0.423731	3.29582	0.000981342	0.00272517
CCG004441	142.526	-2.32318	0.335721	-6.91999	4.52e-12	3.19e-11
CCG004451	547.166	-1.2815	0.216548	-5.91785	3.26e-09	1.81e-08
CCG004457	178.62	1.15781	0.292845	3.95366	7.7e-05	0.000257204
CCG004458	131.165	-1.50157	0.373456	-4.02075	5.8e-05	0.000197138
CCG004462	596.545	1.55178	0.246784	6.28801	3.22e-10	1.95e-09
CCG004464	1000.19	1.34467	0.164409	8.17878	2.87e-16	2.69e-15
CCG004465	72.7367	3.64104	0.494164	7.36808	1.73e-13	1.36e-12
CCG004468	32.3952	3.86788	0.761137	5.08171	3.74e-07	1.69e-06
CCG004472	17.7919	7.85549	1.66401	4.72082	2.35e-06	9.7e-06
CCG004475	57.898	5.75806	0.798121	7.21452	5.41e-13	4.1e-12
CCG004494	2962.95	1.39918	0.196978	7.10322	1.22e-12	9e-12
CCG004511	2860.77	-3.0764	0.162119	-18.9762	2.68e-80	2.31e-78
CCG004524	1410.97	-3.28167	0.206834	-15.8662	1.09e-56	5.13e-55
CCG004527	3648.33	-1.55676	0.166707	-9.33827	9.79e-21	1.18e-19
CCG004528	173.711	-1.67789	0.29662	-5.65668	1.54e-08	8.04e-08
CCG004530	7982.35	2.0702	0.175674	11.7843	4.7e-32	9.4e-31
CCG004534	4540.95	1.71131	0.147279	11.6195	3.28e-31	6.31e-30
CCG004535	160.368	1.78029	0.30457	5.84526	5.06e-09	2.76e-08
CCG004541	10947	1.16174	0.161811	7.17963	6.99e-13	5.27e-12
CCG004545	1865.92	1.052	0.161569	6.51114	7.46e-11	4.78e-10
CCG004546	1716.64	-1.35336	0.165331	-8.18575	2.71e-16	2.55e-15
CCG004547	576.231	1.29581	0.218426	5.93248	2.98e-09	1.67e-08
CCG004549	605.339	-1.52905	0.214743	-7.12038	1.08e-12	7.99e-12
CCG004574	61.0162	-2.45038	0.516894	-4.74059	2.13e-06	8.85e-06
CCG004576	435.062	1.08157	0.263879	4.09873	4.15e-05	0.000144183
CCG004578	25.6717	-2.14034	0.71745	-2.98326	0.00285191	0.0071968
CCG004579	596.484	1.06377	0.193204	5.50593	3.67e-08	1.84e-07
CCG004581	333.678	-1.37702	0.262407	-5.24763	1.54e-07	7.26e-07
CCG004583	212.209	-1.44109	0.298878	-4.82167	1.42e-06	6.03e-06
CCG004590	7724.72	2.73131	0.176078	15.5119	2.88e-54	1.27e-52
CCG004592	1726.07	-1.38101	0.204774	-6.74409	1.54e-11	1.04e-10
CCG004600	138.511	1.77348	0.352337	5.03347	4.82e-07	2.14e-06
CCG004611	21.7203	2.35084	0.75928	3.09614	0.00196057	0.00512376
CCG004617	304.848	1.22664	0.239787	5.11554	3.13e-07	1.43e-06
CCG004618	1887.6	1.45918	0.17748	8.22168	2.01e-16	1.91e-15
CCG004620	699.083	-1.66412	0.193706	-8.59099	8.62e-18	8.92e-17
CCG004624	1960.2	1.22718	0.159583	7.68991	1.47e-14	1.24e-13
CCG004631	6195.92	-1.30141	0.129839	-10.0232	1.21e-23	1.66e-22
CCG004632	1313.85	-1.18939	0.15579	-7.63461	2.26e-14	1.88e-13
CCG004636	890.376	-1.71396	0.183246	-9.35332	8.49e-21	1.02e-19
CCG004639	25348	2.71174	0.127871	21.2068	8.26e-100	1.14e-97
CCG004643	849.709	1.17366	0.178691	6.5681	5.1e-11	3.31e-10
CCG004647	574.905	-1.07938	0.214879	-5.02321	5.08e-07	2.26e-06
CCG004650	173.113	-1.44428	0.30644	-4.7131	2.44e-06	1.01e-05
CCG004655	7244.19	1.54534	0.138385	11.167	5.91e-29	1.04e-27
CCG004662	5227.27	1.47712	0.154665	9.55044	1.29e-21	1.62e-20
CCG004664	9944.16	1.23508	0.153193	8.06225	7.49e-16	6.91e-15
CCG004677	1748.79	1.35196	0.217019	6.2297	4.67e-10	2.8e-09
CCG004693	471.954	-1.39978	0.254686	-5.4961	3.88e-08	1.94e-07
CCG004694	323.487	-3.21443	0.450128	-7.14114	9.26e-13	6.91e-12
CCG004697	219.031	-2.63367	0.288776	-9.12012	7.5e-20	8.62e-19
CCG004698	353.81	-2.0093	0.308291	-6.51755	7.15e-11	4.59e-10
CCG004701	92.8124	2.19895	0.398589	5.51684	3.45e-08	1.74e-07
CCG004704	340.639	-1.80883	0.230308	-7.85398	4.03e-15	3.54e-14
CCG004706	159.913	1.08926	0.30238	3.60229	0.000315422	0.000953992
CCG004712	6876.82	3.08363	0.207621	14.8522	6.73e-50	2.62e-48
CCG004713	308.377	-1.00799	0.230489	-4.37328	1.22e-05	4.59e-05
CCG004715	829.936	-2.23746	0.232223	-9.63496	5.69e-22	7.28e-21
CCG004723	5302.87	2.6435	0.215697	12.2556	1.57e-34	3.51e-33
CCG004730	194.046	-2.0847	0.304723	-6.8413	7.85e-12	5.44e-11
CCG004742	197.168	-1.056	0.287672	-3.67087	0.000241727	0.000747268
CCG004743	1781.32	-4.23665	0.1847	-22.938	1.94e-116	4.11e-114
CCG004746	174.528	-3.98215	0.371868	-10.7085	9.28e-27	1.49e-25
CCG004748	4897.65	2.37631	0.147705	16.0882	3.09e-58	1.53e-56
CCG004751	666.738	2.68972	0.223988	12.0083	3.21e-33	6.72e-32
CCG004752	646.075	-1.26399	0.203891	-6.19934	5.67e-10	3.38e-09
CCG004754	4444.64	1.21961	0.158116	7.71337	1.23e-14	1.04e-13
CCG004755	3556.9	2.10056	0.180598	11.6312	2.86e-31	5.52e-30
CCG004770	1115.98	1.48289	0.1778	8.3402	7.42e-17	7.26e-16
CCG004774	28.6184	-4.93955	1.07309	-4.6031	4.16e-06	1.66e-05
CCG004777	625.481	2.20455	0.211388	10.4289	1.83e-25	2.74e-24
CCG004787	950.897	-2.67364	0.19751	-13.5367	9.49e-42	2.84e-40
CCG004788	171.65	-1.92374	0.307865	-6.24865	4.14e-10	2.49e-09
CCG004797	1329.53	-2.73122	0.174858	-15.6196	5.35e-55	2.4e-53
CCG004801	67.1641	3.49626	0.518287	6.74581	1.52e-11	1.03e-10
CCG004805	524.663	-2.97887	0.219375	-13.5789	5.34e-42	1.61e-40
CCG004809	120.615	-1.58631	0.363267	-4.36679	1.26e-05	4.72e-05
CCG004818	190.751	-2.49496	0.36952	-6.75191	1.46e-11	9.87e-11
CCG004821	95.6167	-1.10826	0.369242	-3.00144	0.00268707	0.00683046
CCG004826	675.605	1.19439	0.217797	5.48397	4.16e-08	2.07e-07
CCG004827	5143.34	-1.19063	0.29698	-4.00912	6.09e-05	0.0002065
CCG004828	3390.16	3.04473	0.169482	17.9648	3.67e-72	2.59e-70
CCG004830	290.083	-1.39594	0.242768	-5.75012	8.92e-09	4.75e-08
CCG004837	255.855	-1.4535	0.301996	-4.81299	1.49e-06	6.28e-06
CCG004840	10108.6	2.84448	0.188714	15.073	2.44e-51	9.95e-50
CCG004841	237.303	1.10111	0.263669	4.17611	2.97e-05	0.000104935
CCG004842	14370.5	1.26665	0.127129	9.9635	2.2e-23	2.99e-22
CCG004843	113.932	-3.84615	0.447334	-8.59794	8.12e-18	8.41e-17
CCG004844	141.18	2.07779	0.324619	6.40071	1.55e-10	9.68e-10
CCG004860	16576	2.91179	0.305835	9.52077	1.72e-21	2.14e-20
CCG004861	2268.64	-2.31502	0.174796	-13.2441	4.88e-40	1.38e-38
CCG004864	212.162	-2.67014	0.355265	-7.51591	5.65e-14	4.57e-13
CCG004868	315.907	4.8352	0.330679	14.6221	2.03e-48	7.51e-47
CCG004874	1422.92	1.03211	0.204635	5.04366	4.57e-07	2.04e-06
CCG004882	22.998	3.6937	0.873053	4.23079	2.33e-05	8.37e-05
CCG004886	3552.27	-1.42578	0.170614	-8.35678	6.45e-17	6.32e-16
CCG004892	4172.78	-1.0484	0.138517	-7.56874	3.77e-14	3.08e-13
CCG004896	563.07	1.37052	0.211349	6.48462	8.9e-11	5.67e-10
CCG004901	2164.24	-1.26604	0.161832	-7.82317	5.15e-15	4.5e-14
CCG004902	2330.18	-1.73272	0.216259	-8.01226	1.13e-15	1.03e-14
CCG004908	324.404	-1.45075	0.270174	-5.36968	7.89e-08	3.84e-07
CCG004909	1013.35	-1.14242	0.183453	-6.22734	4.74e-10	2.85e-09
CCG004917	519.865	-1.89772	0.209452	-9.06038	1.3e-19	1.47e-18
CCG004918	9246.19	1.68898	0.139574	12.1009	1.04e-33	2.26e-32
CCG004924	870.073	-2.86673	0.19243	-14.8975	3.42e-50	1.34e-48
CCG004929	427.658	-2.91234	0.308676	-9.43495	3.91e-21	4.8e-20
CCG004931	1144.05	1.95086	0.344845	5.65721	1.54e-08	8.02e-08
CCG004933	493.902	-2.01322	0.230906	-8.71876	2.81e-18	2.99e-17
CCG004934	252.235	-2.01125	0.288626	-6.96836	3.21e-12	2.29e-11
CCG004937	7528.05	4.10743	0.237049	17.3273	2.93e-67	1.82e-65
CCG004938	364.942	1.64642	0.273382	6.02241	1.72e-09	9.82e-09
CCG004942	27.5647	-3.40171	0.838533	-4.05674	4.98e-05	0.000170848
CCG004943	70.4568	3.09919	0.499672	6.20244	5.56e-10	3.32e-09
CCG004958	172.263	1.49501	0.370888	4.0309	5.56e-05	0.000189448
CCG004969	345.586	-1.19001	0.236113	-5.04001	4.66e-07	2.08e-06
CCG004973	557.076	-1.00919	0.191762	-5.26269	1.42e-07	6.72e-07
CCG004975	2302.83	2.83656	0.15383	18.4396	6.32e-76	4.92e-74
CCG004976	1392.04	1.31659	0.151828	8.67159	4.26e-18	4.48e-17
CCG004995	1847.7	-1.17173	0.151508	-7.73381	1.04e-14	8.92e-14
CCG004999	4256.96	-1.35832	0.220446	-6.16166	7.2e-10	4.26e-09
CCG005004	4183.01	-1.39197	0.158566	-8.77846	1.66e-18	1.78e-17
CCG005012	1432.34	2.37511	0.164126	14.4712	1.84e-47	6.55e-46
CCG005013	763.726	1.87584	0.215093	8.72109	2.76e-18	2.93e-17
CCG005014	3579.03	2.41833	0.173215	13.9615	2.68e-44	8.69e-43
CCG005015	506.159	-1.67575	0.248382	-6.74667	1.51e-11	1.02e-10
CCG005016	2535.99	3.49015	0.161356	21.6301	9.36e-104	1.4e-101
CCG005018	247.189	2.00724	0.253598	7.91506	2.47e-15	2.21e-14
CCG005026	33271.9	1.7444	0.168152	10.374	3.26e-25	4.83e-24
CCG005030	629.64	-1.95498	0.199397	-9.80443	1.08e-22	1.42e-21
CCG005031	136.195	-2.04653	0.405742	-5.04393	4.56e-07	2.04e-06
CCG005033	1947.45	-1.6714	0.328538	-5.0874	3.63e-07	1.64e-06
CCG005036	194.559	1.74395	0.286811	6.08049	1.2e-09	6.94e-09
CCG005037	10558.1	1.20075	0.128345	9.35565	8.31e-21	1e-19
CCG005040	211.695	-1.95186	0.302239	-6.45798	1.06e-10	6.72e-10
CCG005045	4458.51	-2.11744	0.161001	-13.1517	1.66e-39	4.59e-38
CCG005046	1613.25	6.66062	0.780869	8.52975	1.47e-17	1.49e-16
CCG005047	131.317	-2.60471	0.372118	-6.99969	2.57e-12	1.85e-11
CCG005051	903.082	1.08109	0.250887	4.30908	1.64e-05	6.03e-05
CCG005052	55.395	7.03433	1.12465	6.25468	3.98e-10	2.4e-09
CCG005058	18.8113	4.42652	1.04756	4.22554	2.38e-05	8.56e-05
CCG005063	258.358	-1.02552	0.352979	-2.90534	0.00366858	0.00904308
CCG005073	331.582	2.93181	0.265837	11.0286	2.78e-28	4.73e-27
CCG005084	61.5711	-2.07653	0.5556	-3.73744	0.000185901	0.000585271
CCG005087	9811.7	1.96308	0.152483	12.8741	6.3e-38	1.61e-36
CCG005089	86.7424	2.12053	0.446222	4.75218	2.01e-06	8.37e-06
CCG005092	5802.89	1.77827	0.159116	11.1759	5.35e-29	9.4e-28
CCG005096	792.738	2.51363	0.207187	12.1321	7.14e-34	1.56e-32
CCG005106	233.595	-1.78079	0.263769	-6.75134	1.46e-11	9.91e-11
CCG005117	913.66	2.781	0.225268	12.3453	5.17e-35	1.18e-33
CCG005121	93.8613	1.4217	0.376798	3.77311	0.000161223	0.000512313
CCG005125	1112.19	-1.63035	0.185091	-8.80834	1.27e-18	1.38e-17
CCG005128	100.236	3.8323	0.527701	7.26225	3.81e-13	2.92e-12
CCG005130	1042.41	-2.56847	0.320821	-8.00594	1.19e-15	1.08e-14
CCG005133	569.093	-1.61781	0.29825	-5.42433	5.82e-08	2.86e-07
CCG005135	723.344	-1.55018	0.17864	-8.6777	4.04e-18	4.25e-17
CCG005139	603.194	2.52015	0.197258	12.7759	2.23e-37	5.58e-36
CCG005141	287.101	-3.26528	0.274106	-11.9125	1.02e-32	2.1e-31
CCG005142	1241.95	-1.09676	0.157408	-6.96764	3.22e-12	2.3e-11
CCG005147	86.9087	-1.73411	0.546038	-3.1758	0.00149425	0.0039996
CCG005149	2626.16	1.22004	0.174645	6.98585	2.83e-12	2.03e-11
CCG005152	435.77	-2.06633	0.289696	-7.13276	9.84e-13	7.32e-12
CCG005153	25646.4	3.58064	0.125495	28.5321	4.68e-179	3.85e-176
CCG005154	5030.21	3.15844	0.218121	14.4802	1.62e-47	5.76e-46
CCG005157	107.737	4.36359	0.471005	9.26443	1.96e-20	2.32e-19
CCG005159	368.843	-2.37916	0.234239	-10.157	3.09e-24	4.34e-23
CCG005160	450.753	1.58388	0.259699	6.09892	1.07e-09	6.23e-09
CCG005163	418.5	1.41699	0.231305	6.12607	9.01e-10	5.28e-09
CCG005166	541.982	-3.18363	0.234732	-13.5628	6.65e-42	1.99e-40
CCG005172	9299.55	1.70827	0.21524	7.93657	2.08e-15	1.87e-14
CCG005173	2747.8	-1.05618	0.155337	-6.79928	1.05e-11	7.2e-11
CCG005175	1798.1	-1.05078	0.160389	-6.55149	5.7e-11	3.68e-10
CCG005177	33.4591	-8.25555	1.56293	-5.28208	1.28e-07	6.09e-07
CCG005181	1543.82	1.09805	0.167179	6.56812	5.1e-11	3.31e-10
CCG005182	1638.24	2.7265	0.166964	16.3298	6.05e-60	3.13e-58
CCG005194	108.729	1.52389	0.356129	4.27904	1.88e-05	6.85e-05
CCG005209	400.123	1.40592	0.295761	4.75358	2e-06	8.32e-06
CCG005219	218.992	-2.14259	0.282356	-7.58826	3.24e-14	2.66e-13
CCG005220	1189.69	-1.94404	0.173912	-11.1783	5.21e-29	9.16e-28
CCG005227	9639.82	-1.99004	0.183586	-10.8399	2.23e-27	3.66e-26
CCG005228	1808.96	-2.78987	0.245466	-11.3656	6.2e-30	1.13e-28
CCG005229	788.761	-1.78509	0.243127	-7.34223	2.1e-13	1.64e-12
CCG005230	17484.7	-3.07087	0.213105	-14.4101	4.47e-47	1.56e-45
CCG005232	9233.63	1.62148	0.205263	7.89953	2.8e-15	2.5e-14
CCG005241	202.318	2.41005	0.338184	7.12645	1.03e-12	7.66e-12
CCG005243	1607.54	-2.67585	0.189465	-14.1232	2.73e-45	9.11e-44
CCG005260	113.594	1.22335	0.379838	3.22071	0.00127874	0.00346491
CCG005262	356.074	-3.49811	0.286123	-12.2259	2.26e-34	5.01e-33
CCG005268	1395.97	-1.19608	0.21883	-5.46581	4.61e-08	2.29e-07
CCG005270	210.236	-1.1128	0.363654	-3.06004	0.00221305	0.00572038
CCG005281	4437.29	1.17768	0.172268	6.83632	8.13e-12	5.63e-11
CCG005283	25.3725	2.083	0.715504	2.91123	0.00360006	0.00889292
CCG005287	1432.07	-1.64312	0.198708	-8.26901	1.35e-16	1.3e-15
CCG005290	4085.47	2.23364	0.163436	13.6667	1.61e-42	4.91e-41
CCG005292	431.533	-1.90721	0.347551	-5.48757	4.08e-08	2.03e-07
CCG005293	117.106	-1.45043	0.461104	-3.14557	0.00165764	0.00440404
CCG005294	18077.2	2.76627	0.172374	16.048	5.9e-58	2.89e-56
CCG005295	4430.34	2.392	0.191603	12.4841	9.11e-36	2.14e-34
CCG005304	6453.58	1.36898	0.244854	5.59101	2.26e-08	1.16e-07
CCG005310	301.08	-1.59185	0.301045	-5.28773	1.24e-07	5.91e-07
CCG005320	901.518	3.11834	0.334931	9.3104	1.27e-20	1.52e-19
CCG005322	409.746	1.01246	0.224685	4.50615	6.6e-06	2.57e-05
CCG005341	1224.51	-2.74772	0.192979	-14.2384	5.29e-46	1.81e-44
CCG005349	107.829	-1.58944	0.371648	-4.27675	1.9e-05	6.92e-05
CCG005351	291.077	2.08052	0.287137	7.24575	4.3e-13	3.28e-12
CCG005360	2416.01	1.25008	0.148484	8.41895	3.8e-17	3.77e-16
CCG005361	12678.7	1.59706	0.175582	9.09581	9.39e-20	1.07e-18
CCG005362	573.181	1.1968	0.209657	5.70837	1.14e-08	6.01e-08
CCG005376	219.172	-3.32067	0.438088	-7.57991	3.46e-14	2.84e-13
CCG005379	3718	-1.33837	0.18986	-7.04923	1.8e-12	1.31e-11
CCG005384	1548.28	-2.21439	0.168516	-13.1405	1.93e-39	5.29e-38
CCG005385	747.903	-1.28373	0.18094	-7.09477	1.3e-12	9.54e-12
CCG005392	469.435	6.80288	0.383333	17.7467	1.83e-70	1.23e-68
CCG005398	667.382	-1.76424	0.226947	-7.7738	7.62e-15	6.57e-14
CCG005404	777.484	2.34382	0.211762	11.0682	1.79e-28	3.08e-27
CCG005405	2170.48	4.75541	0.199933	23.7851	4.77e-125	1.23e-122
CCG005406	31.1214	1.828	0.633464	2.88573	0.00390508	0.00957192
CCG005411	72508.3	1.28264	0.182944	7.01109	2.36e-12	1.71e-11
CCG005413	8094.66	1.5083	0.134691	11.1983	4.16e-29	7.36e-28
CCG005419	1827.38	2.86847	0.164231	17.4661	2.6e-68	1.66e-66
CCG005423	9513.09	2.69982	0.311694	8.66176	4.65e-18	4.88e-17
CCG005424	589.398	1.26136	0.187315	6.7339	1.65e-11	1.11e-10
CCG005427	1235.29	2.16392	0.208149	10.396	2.59e-25	3.84e-24
CCG005433	816.666	-1.82583	0.215298	-8.48047	2.24e-17	2.26e-16
CCG005435	375.227	1.26961	0.2238	5.67297	1.4e-08	7.35e-08
CCG005438	326.502	-1.79472	0.317798	-5.64735	1.63e-08	8.47e-08
CCG005443	541.28	1.0728	0.228969	4.68534	2.8e-06	1.14e-05
CCG005446	327.946	-1.06517	0.282703	-3.7678	0.000164693	0.000522426
CCG005447	1251.32	-2.0141	0.260932	-7.71885	1.17e-14	9.99e-14
CCG005457	1447.9	-1.0706	0.203755	-5.25438	1.49e-07	7.02e-07
CCG005460	464.194	-1.13455	0.231336	-4.90435	9.37e-07	4.04e-06
CCG005467	832.621	-1.99313	0.175094	-11.3832	5.07e-30	9.3e-29
CCG005480	1709.36	-6.34179	0.322759	-19.6487	5.93e-86	5.83e-84
CCG005509	96.7504	-1.7665	0.384482	-4.59449	4.34e-06	1.73e-05
CCG005515	120.795	-1.79895	0.387737	-4.6396	3.49e-06	1.41e-05
CCG005517	114.763	-1.861	0.363148	-5.12464	2.98e-07	1.36e-06
CCG005521	1183.58	5.31005	0.291271	18.2306	2.95e-74	2.22e-72
CCG005523	860.77	3.13668	0.185255	16.9317	2.63e-64	1.52e-62
CCG005525	21269.4	1.0256	0.130389	7.86573	3.67e-15	3.24e-14
CCG005534	218.673	1.42835	0.273431	5.22382	1.75e-07	8.2e-07
CCG005538	1386.87	-1.93674	0.165	-11.7379	8.15e-32	1.6e-30
CCG005539	1300.38	1.32217	0.324082	4.07974	4.51e-05	0.000155588
CCG005541	7547.44	1.13391	0.137797	8.22884	1.89e-16	1.8e-15
CCG005542	17163.3	3.62845	0.15165	23.9265	1.62e-126	4.35e-124
CCG005546	489.056	-1.00295	0.217726	-4.60647	4.1e-06	1.64e-05
CCG005549	338.877	1.12061	0.298857	3.74965	0.000177084	0.000559495
CCG005556	1904.4	2.69528	0.290484	9.27859	1.72e-20	2.04e-19
CCG005561	873.107	-1.15328	0.1697	-6.79601	1.08e-11	7.35e-11
CCG005566	53.8692	-1.74252	0.545491	-3.1944	0.00140122	0.00376784
CCG005573	1316.76	-3.62134	0.211773	-17.1001	1.48e-65	8.81e-64
CCG005577	247.389	-1.4579	0.266011	-5.48061	4.24e-08	2.11e-07
CCG005578	748.346	-2.33667	0.207805	-11.2445	2.47e-29	4.4e-28
CCG005583	12.0733	-6.78383	1.78265	-3.80547	0.000141535	0.000454806
CCG005589	4833.74	-1.9434	0.133569	-14.5498	5.86e-48	2.11e-46
CCG005592	246.948	-1.03943	0.289155	-3.59472	0.00032474	0.000981106
CCG005594	196.411	-1.0883	0.325917	-3.33921	0.000840178	0.00236448
CCG005595	35716	4.62608	0.241067	19.19	4.49e-82	4.09e-80
CCG005611	2961.86	5.65474	0.227736	24.8303	4.22e-136	1.34e-133
CCG005612	223.245	2.4623	0.271509	9.06895	1.2e-19	1.37e-18
CCG005616	6875.37	1.49633	0.157578	9.4958	2.19e-21	2.71e-20
CCG005625	383.036	-2.24934	0.271153	-8.29547	1.08e-16	1.05e-15
CCG005626	496.512	-1.37681	0.239813	-5.74119	9.4e-09	5e-08
CCG005635	241.878	-1.35947	0.257367	-5.28224	1.28e-07	6.08e-07
CCG005636	5708.2	1.32528	0.222878	5.94623	2.74e-09	1.54e-08
CCG005637	114.88	-4.18297	0.489976	-8.53709	1.38e-17	1.4e-16
CCG005639	439.381	1.25561	0.221516	5.66825	1.44e-08	7.54e-08
CCG005641	693.109	2.21591	0.188176	11.7757	5.21e-32	1.04e-30
CCG005646	380.269	1.3622	0.235088	5.79441	6.86e-09	3.69e-08
CCG005647	284.356	1.2834	0.242286	5.29705	1.18e-07	5.63e-07
CCG005654	117.611	-2.02977	0.363774	-5.57977	2.41e-08	1.23e-07
CCG005657	32.399	8.71989	1.56847	5.55948	2.71e-08	1.38e-07
CCG005658	48.4222	5.49169	0.841539	6.52578	6.76e-11	4.35e-10
CCG005659	2160.69	6.29648	0.739127	8.51881	1.61e-17	1.64e-16
CCG005660	8796.13	1.1049	0.1661	6.65202	2.89e-11	1.91e-10
CCG005661	6535.84	1.90471	0.165826	11.4862	1.55e-30	2.9e-29
CCG005662	309.882	1.18727	0.250597	4.73778	2.16e-06	8.96e-06
CCG005664	1353.86	1.6575	0.218794	7.57562	3.57e-14	2.93e-13
CCG005665	241.646	-2.03867	0.308971	-6.59826	4.16e-11	2.72e-10
CCG005672	738.397	-3.94489	0.221108	-17.8415	3.36e-71	2.3e-69
CCG005674	25.5743	2.18278	0.712349	3.06419	0.00218258	0.00565082
CCG005684	174.085	-1.00325	0.304723	-3.29234	0.000993559	0.00275463
CCG005686	6075.05	-2.80831	0.671338	-4.18316	2.87e-05	0.000101927
CCG005688	3892.28	2.77703	0.221251	12.5515	3.9e-36	9.26e-35
CCG005691	487.748	-1.22595	0.254354	-4.81985	1.44e-06	6.08e-06
CCG005692	1766.94	1.04457	0.22704	4.60082	4.21e-06	1.68e-05
CCG005693	282.597	2.21663	0.259624	8.53785	1.37e-17	1.4e-16
CCG005695	140.427	1.30923	0.326531	4.00951	6.08e-05	0.000206222
CCG005697	10378.7	3.4082	0.244249	13.9538	2.98e-44	9.66e-43
CCG005701	29.2691	2.02456	0.68307	2.96391	0.00303761	0.00761956
CCG005721	8927.88	1.30001	0.176649	7.35925	1.85e-13	1.45e-12
CCG005722	21.2062	5.62083	1.31941	4.2601	2.04e-05	7.42e-05
CCG005725	1110.3	4.11884	0.190144	21.6616	4.72e-104	7.09e-102
CCG005731	164.535	-1.29469	0.337289	-3.83851	0.000123781	0.000401385
CCG005732	308.397	-1.10202	0.228665	-4.81935	1.44e-06	6.09e-06
CCG005733	436.35	-1.06142	0.226932	-4.67726	2.91e-06	1.19e-05
CCG005740	620.7	3.6847	0.227832	16.1729	7.83e-59	3.95e-57
CCG005745	941.473	-1.07504	0.170819	-6.29345	3.1e-10	1.89e-09
CCG005746	70.5184	3.61446	0.64576	5.59722	2.18e-08	1.12e-07
CCG005748	527.455	2.33319	0.260627	8.95219	3.48e-19	3.88e-18
CCG005757	20052.2	1.65404	0.172741	9.57526	1.02e-21	1.28e-20
CCG005758	1111.87	-2.47723	0.180582	-13.718	7.92e-43	2.45e-41
CCG005764	468.752	1.11431	0.238529	4.67156	2.99e-06	1.22e-05
CCG005766	22.4126	-3.54056	0.901984	-3.9253	8.66e-05	0.000286938
CCG005767	2071.46	1.14109	0.180286	6.32934	2.46e-10	1.51e-09
CCG005785	592.415	1.11038	0.188378	5.89444	3.76e-09	2.08e-08
CCG005787	813.554	-1.23965	0.323723	-3.82935	0.000128483	0.000415812
CCG005793	930.656	1.3985	0.373612	3.74318	0.000181707	0.000572717
CCG005794	2771.08	2.25515	0.149231	15.1117	1.36e-51	5.57e-50
CCG005795	289.252	3.35022	0.294136	11.39	4.69e-30	8.62e-29
CCG005797	552.47	-2.29387	0.225161	-10.1877	2.25e-24	3.19e-23
CCG005808	70.3495	-1.65831	0.439606	-3.77226	0.000161777	0.000513836
CCG005812	1767.63	-1.3956	0.149896	-9.31044	1.27e-20	1.52e-19
CCG005814	5079.05	2.05454	0.140945	14.5769	3.94e-48	1.43e-46
CCG005815	1332.61	-1.05962	0.166945	-6.34711	2.19e-10	1.35e-09
CCG005822	1506.15	-1.05109	0.185582	-5.66377	1.48e-08	7.73e-08
CCG005824	100.02	-1.94906	0.388842	-5.01248	5.37e-07	2.38e-06
CCG005831	2077.42	-2.6249	0.174163	-15.0715	2.49e-51	1.02e-49
CCG005836	1299.7	1.48871	0.161761	9.20316	3.48e-20	4.06e-19
CCG005843	142.095	1.37079	0.333037	4.11602	3.85e-05	0.000134397
CCG005848	31747.1	1.33004	0.180116	7.38437	1.53e-13	1.21e-12
CCG005856	3759.71	2.55607	0.198369	12.8854	5.44e-38	1.39e-36
CCG005864	4422.31	-1.02475	0.13469	-7.60817	2.78e-14	2.29e-13
CCG005865	3750.49	-1.78906	0.145829	-12.2682	1.34e-34	3.02e-33
CCG005866	3372.88	2.74949	0.147979	18.5803	4.64e-77	3.71e-75
CCG005867	953.738	-3.86514	0.193031	-20.0234	3.44e-89	3.7e-87
CCG005868	108.929	-1.57622	0.382902	-4.11652	3.85e-05	0.00013415
CCG005877	210.284	1.66963	0.305281	5.46917	4.52e-08	2.25e-07
CCG005878	348.241	2.79341	0.246583	11.3285	9.48e-30	1.72e-28
CCG005888	2196.62	2.92389	0.17683	16.535	2.05e-61	1.1e-59
CCG005904	7831.8	1.32635	0.171532	7.73237	1.06e-14	9.01e-14
CCG005909	276.263	-2.77428	0.279793	-9.91549	3.57e-23	4.8e-22
CCG005911	8720.89	4.24158	0.160423	26.4401	4.75e-154	2.34e-151
CCG005917	177.353	-1.49214	0.35895	-4.15696	3.23e-05	0.000113639
CCG005918	50.3824	-2.60933	0.554973	-4.70173	2.58e-06	1.06e-05
CCG005919	3179.97	1.34204	0.162146	8.2767	1.27e-16	1.22e-15
CCG005920	23473	1.27015	0.139837	9.0831	1.06e-19	1.2e-18
CCG005926	17949.2	-2.60537	0.189921	-13.7182	7.9e-43	2.45e-41
CCG005934	11789.2	2.04855	0.142199	14.4062	4.73e-47	1.65e-45
CCG005937	514.719	-1.60235	0.253006	-6.33324	2.4e-10	1.48e-09
CCG005939	5692.55	-2.42595	0.14476	-16.7584	4.91e-63	2.77e-61
CCG005948	28.5924	-8.02969	1.5877	-5.05742	4.25e-07	1.91e-06
CCG005953	18.8152	-2.60474	0.88905	-2.9298	0.00339183	0.00842254
CCG005960	2325.16	4.76896	0.164921	28.9167	7.37e-184	7.12e-181
CCG005961	22359.9	2.80673	0.157035	17.8733	1.9e-71	1.33e-69
CCG005963	760.886	-1.70433	0.217285	-7.84374	4.37e-15	3.83e-14
CCG005964	213.4	-1.14805	0.308811	-3.71766	0.000201079	0.000629668
CCG005973	1174	3.20875	0.185895	17.261	9.24e-67	5.67e-65
CCG005983	904.939	-2.04334	0.271511	-7.52579	5.24e-14	4.26e-13
CCG006013	65.9781	-1.72235	0.519034	-3.31838	0.000905409	0.00253075
CCG006019	6453.95	-1.14653	0.15421	-7.43486	1.05e-13	8.33e-13
CCG006023	751.567	2.48718	0.205612	12.0965	1.1e-33	2.38e-32
CCG006030	684.284	1.25898	0.197477	6.37532	1.83e-10	1.13e-09
CCG006031	101.252	2.37327	0.703516	3.37344	0.000742346	0.00210703
CCG006039	20.0327	3.69736	0.979411	3.77509	0.000159952	0.000508694
CCG006051	3282.87	4.534	0.239745	18.9117	9.13e-80	7.74e-78
CCG006059	25.8393	2.34712	0.781198	3.00452	0.00266003	0.00677025
CCG006070	183.18	1.85524	0.353571	5.24715	1.54e-07	7.28e-07
CCG006074	2540	1.30428	0.147765	8.8267	1.08e-18	1.17e-17
CCG006081	1796.95	2.19913	0.182817	12.0291	2.5e-33	5.27e-32
CCG006093	7261.37	1.52816	0.149287	10.2364	1.36e-24	1.95e-23
CCG006095	713.143	-2.63071	0.191301	-13.7517	4.98e-43	1.56e-41
CCG006097	3507.14	2.73423	0.19616	13.9388	3.68e-44	1.19e-42
CCG006098	801.773	-3.51016	0.259753	-13.5135	1.3e-41	3.86e-40
CCG006102	830.679	2.33067	0.257417	9.05409	1.38e-19	1.56e-18
CCG006107	1760.31	1.04129	0.163678	6.36181	1.99e-10	1.23e-09
CCG006108	458.139	-2.47658	0.258805	-9.56929	1.08e-21	1.35e-20
CCG006113	595.313	-1.16528	0.21373	-5.45212	4.98e-08	2.46e-07
CCG006114	146.218	-2.42098	0.3534	-6.85055	7.36e-12	5.12e-11
CCG006119	439.758	-1.35467	0.204093	-6.63752	3.19e-11	2.11e-10
CCG006125	3423.4	-1.17949	0.200905	-5.87086	4.34e-09	2.38e-08
CCG006126	3209.8	1.84158	0.161167	11.4265	3.08e-30	5.72e-29
CCG006129	202.372	-1.81774	0.325308	-5.58773	2.3e-08	1.18e-07
CCG006134	136.054	-1.62063	0.409668	-3.95596	7.62e-05	0.000254972
CCG006135	1142.06	-2.49634	0.167357	-14.9163	2.58e-50	1.02e-48
CCG006138	7709.74	1.1807	0.211726	5.57654	2.45e-08	1.25e-07
CCG006150	39.4415	-2.44217	0.713442	-3.42308	0.000619151	0.0017794
CCG006153	24.6525	8.32719	1.63223	5.10171	3.37e-07	1.53e-06
CCG006160	317.889	-2.73816	0.254698	-10.7506	5.89e-27	9.53e-26
CCG006164	7801.12	-2.11036	0.142051	-14.8564	6.32e-50	2.47e-48
CCG006171	112.255	-3.19645	0.450875	-7.08943	1.35e-12	9.9e-12
CCG006173	88.3284	-2.94956	0.457447	-6.44786	1.13e-10	7.17e-10
CCG006174	35.5498	-2.60415	0.656092	-3.96919	7.21e-05	0.000241992
CCG006180	498.851	-1.16939	0.205564	-5.6887	1.28e-08	6.72e-08
CCG006187	3803.26	1.04102	0.156772	6.64038	3.13e-11	2.07e-10
CCG006199	125.749	2.30885	0.375068	6.1558	7.47e-10	4.42e-09
CCG006201	1070.96	-1.03962	0.187684	-5.53919	3.04e-08	1.54e-07
CCG006202	877.353	-2.25667	0.177109	-12.7417	3.47e-37	8.59e-36
CCG006203	1785.52	-2.91279	0.232887	-12.5073	6.81e-36	1.61e-34
CCG006206	3860.22	-6.96975	0.321687	-21.6662	4.27e-104	6.46e-102
CCG006208	36.5074	-3.68572	0.809893	-4.55088	5.34e-06	2.11e-05
CCG006210	737.937	1.42412	0.18372	7.75158	9.08e-15	7.79e-14
CCG006214	2194.5	-1.77716	0.152547	-11.6499	2.3e-31	4.45e-30
CCG006215	37.0691	2.38802	0.700455	3.40925	0.000651426	0.00186564
CCG006216	7482.32	1.1825	0.285587	4.1406	3.46e-05	0.000121578
CCG006221	1817.33	2.356	0.148993	15.8128	2.54e-56	1.19e-54
CCG006227	258.65	1.07335	0.244833	4.38402	1.17e-05	4.39e-05
CCG006228	1601.22	1.19289	0.185739	6.42238	1.34e-10	8.44e-10
CCG006236	195.154	-1.01224	0.310694	-3.258	0.00112201	0.00307508
CCG006237	361.181	-1.01868	0.217023	-4.69385	2.68e-06	1.1e-05
CCG006239	342.607	-2.33915	0.283908	-8.23912	1.73e-16	1.66e-15
CCG006256	17.5807	-7.32822	1.67106	-4.38537	1.16e-05	4.36e-05
CCG006259	251.604	-2.09339	0.33427	-6.26256	3.79e-10	2.29e-09
CCG006271	946.796	1.20355	0.167358	7.19148	6.41e-13	4.84e-12
CCG006273	738.26	4.48602	0.21156	21.2044	8.69e-100	1.19e-97
CCG006274	4790.75	-3.40637	0.240098	-14.1874	1.1e-45	3.71e-44
CCG006304	136.701	-1.11404	0.319371	-3.48824	0.000486203	0.00142251
CCG006305	229.525	-1.06312	0.297552	-3.57288	0.000353077	0.00106138
CCG006317	172.186	-2.44604	0.360975	-6.77621	1.23e-11	8.4e-11
CCG006319	1300.41	-2.68443	0.280579	-9.56747	1.1e-21	1.37e-20
CCG006320	1402.42	-1.44985	0.17095	-8.48112	2.23e-17	2.25e-16
CCG006329	446.798	-2.99324	0.262379	-11.4081	3.81e-30	7.03e-29
CCG006332	214.151	1.47	0.262292	5.60446	2.09e-08	1.08e-07
CCG006334	2162.8	1.01781	0.147411	6.9046	5.03e-12	3.54e-11
CCG006336	793.802	-1.11937	0.284674	-3.93211	8.42e-05	0.000279676
CCG006340	72.7797	5.83113	0.720571	8.09238	5.85e-16	5.44e-15
CCG006343	305.412	-6.81862	0.564279	-12.0838	1.29e-33	2.76e-32
CCG006348	362.513	-1.16725	0.25609	-4.55797	5.16e-06	2.04e-05
CCG006356	73.9396	4.47308	0.670893	6.66735	2.6e-11	1.73e-10
CCG006357	397.368	7.01493	1.03487	6.77856	1.21e-11	8.27e-11
CCG006358	17.2121	6.35506	1.668	3.81	0.000138969	0.000447467
CCG006359	2977.69	1.83238	0.142149	12.8905	5.09e-38	1.31e-36
CCG006360	1208.21	1.59853	0.172339	9.27548	1.77e-20	2.09e-19
CCG006362	2890.09	-1.52981	0.187993	-8.1376	4.03e-16	3.77e-15
CCG006377	1582.15	1.24424	0.260292	4.78018	1.75e-06	7.34e-06
CCG006379	1165.47	-1.40596	0.159804	-8.79799	1.39e-18	1.51e-17
CCG006394	812.909	-1.87041	0.19569	-9.55799	1.2e-21	1.5e-20
CCG006396	3883.78	5.64528	0.173702	32.4997	1.08e-231	1.99e-228
CCG006402	563.022	4.18704	0.306715	13.6512	1.98e-42	6.05e-41
CCG006406	2488.08	-1.09809	0.148195	-7.40974	1.27e-13	1e-12
CCG006413	560.959	-1.3616	0.233195	-5.8389	5.25e-09	2.86e-08
CCG006420	9656.9	1.53082	0.261976	5.84336	5.12e-09	2.79e-08
CCG006431	1128.72	-1.3919	0.173858	-8.00597	1.19e-15	1.08e-14
CCG006432	48.6151	-3.01198	0.6507	-4.62883	3.68e-06	1.48e-05
CCG006436	20.9778	-3.20871	0.951903	-3.37084	0.000749399	0.00212569
CCG006439	1887.82	1.41135	0.172888	8.16339	3.26e-16	3.06e-15
CCG006442	36.3243	-1.97707	0.634444	-3.11622	0.00183185	0.00481625
CCG006443	1085.89	1.97042	0.19057	10.3396	4.66e-25	6.84e-24
CCG006446	250.143	-1.49648	0.339258	-4.41102	1.03e-05	3.9e-05
CCG006447	128.344	1.88188	0.363257	5.18057	2.21e-07	1.02e-06
CCG006450	1039.91	-1.60526	0.185977	-8.63147	6.06e-18	6.32e-17
CCG006455	9019.54	1.60073	0.154612	10.3532	4.05e-25	5.97e-24
CCG006458	256.771	1.28748	0.254745	5.05401	4.33e-07	1.94e-06
CCG006460	1933.26	1.62824	0.174316	9.34071	9.57e-21	1.15e-19
CCG006461	28.5757	2.96584	1.0158	2.91972	0.00350344	0.00867064
CCG006470	99.2969	1.19035	0.354908	3.35397	0.000796607	0.00225184
CCG006485	6795.17	1.75723	0.170394	10.3127	6.17e-25	8.99e-24
CCG006490	368.63	2.65584	0.274456	9.67672	3.79e-22	4.85e-21
CCG006509	14.9188	2.78884	0.944854	2.95161	0.00316123	0.00790111
CCG006510	31734	1.47071	0.190971	7.70122	1.35e-14	1.14e-13
CCG006513	954.781	-1.40972	0.182728	-7.71483	1.21e-14	1.03e-13
CCG006515	390.562	-2.57428	0.267611	-9.61948	6.62e-22	8.42e-21
CCG006520	3378.39	2.3729	0.208922	11.3578	6.78e-30	1.24e-28
CCG006521	676.598	2.57878	0.211725	12.1799	3.98e-34	8.76e-33
CCG006522	1230.47	1.38768	0.171553	8.08894	6.02e-16	5.58e-15
CCG006524	910.494	-1.1611	0.169998	-6.83012	8.48e-12	5.86e-11
CCG006526	1309.55	-2.43117	0.173956	-13.9758	2.19e-44	7.14e-43
CCG006527	193.783	-1.31634	0.315975	-4.16595	3.1e-05	0.000109494
CCG006545	18021	-1.19092	0.158566	-7.51054	5.89e-14	4.76e-13
CCG006550	3671.15	-1.42841	0.156595	-9.12173	7.39e-20	8.5e-19
CCG006561	1865.57	-1.31016	0.159055	-8.23716	1.76e-16	1.69e-15
CCG006564	1507.77	-2.80554	0.340325	-8.24371	1.67e-16	1.6e-15
CCG006574	359.342	-1.07365	0.309334	-3.47083	0.000518846	0.00150967
CCG006583	315.578	-1.37581	0.27091	-5.07848	3.8e-07	1.72e-06
CCG006584	576.671	1.45437	0.22973	6.33077	2.44e-10	1.5e-09
CCG006589	1074.61	3.28052	0.267834	12.2483	1.71e-34	3.83e-33
CCG006591	153.099	-1.40392	0.360312	-3.8964	9.76e-05	0.000321209
CCG006592	1496.3	-2.13303	0.216076	-9.87165	5.52e-23	7.37e-22
CCG006596	1162.52	-2.84693	0.249263	-11.4214	3.27e-30	6.05e-29
CCG006602	10563.3	1.63627	0.157207	10.4084	2.27e-25	3.38e-24
CCG006604	1261.51	-2.02902	0.174401	-11.6342	2.76e-31	5.34e-30
CCG006605	2401.49	-1.81018	0.170709	-10.6039	2.86e-26	4.48e-25
CCG006612	1198.59	1.07097	0.160488	6.6732	2.5e-11	1.67e-10
CCG006634	325.445	1.66612	0.228744	7.28375	3.25e-13	2.5e-12
CCG006636	19.4438	-2.64892	0.919252	-2.8816	0.00395657	0.00968318
CCG006638	531.37	-3.15613	0.291076	-10.843	2.15e-27	3.54e-26
CCG006643	124.864	1.10981	0.324799	3.41691	0.000633353	0.00181716
CCG006644	374.66	1.06039	0.252432	4.20069	2.66e-05	9.49e-05
CCG006645	909.452	2.28206	0.196015	11.6422	2.51e-31	4.86e-30
CCG006648	380.894	-2.19004	0.352454	-6.2137	5.18e-10	3.1e-09
CCG006650	711.237	1.5514	0.293176	5.29172	1.21e-07	5.79e-07
CCG006654	329.556	1.09901	0.273911	4.01229	6.01e-05	0.000203869
CCG006658	27863.6	1.35693	0.185281	7.32365	2.41e-13	1.87e-12
CCG006659	1693.24	-2.95657	0.193973	-15.2422	1.86e-52	7.81e-51
CCG006660	600.514	-2.90409	0.234556	-12.3812	3.3e-35	7.59e-34
CCG006673	960.443	1.29697	0.197998	6.55043	5.74e-11	3.7e-10
CCG006681	50.5778	-3.37127	0.590597	-5.70823	1.14e-08	6.02e-08
CCG006682	36.3707	-2.93253	0.702991	-4.17151	3.03e-05	0.000106994
CCG006683	3004.5	-2.1334	0.168595	-12.654	1.06e-36	2.58e-35
CCG006685	7.34409	-6.07001	1.99647	-3.04037	0.00236291	0.00608017
CCG006696	58.8584	-2.17881	0.507943	-4.28948	1.79e-05	6.55e-05
CCG006703	9808.99	-2.54107	0.128657	-19.7507	7.92e-87	7.96e-85
CCG006704	16161.5	-2.60887	0.141239	-18.4712	3.52e-76	2.76e-74
CCG006713	2985.02	3.11132	0.163353	19.0467	7e-81	6.13e-79
CCG006714	1878.8	-2.13142	0.181356	-11.7527	6.84e-32	1.35e-30
CCG006715	768.354	-1.38939	0.263493	-5.27297	1.34e-07	6.38e-07
CCG006728	7790.56	-1.11838	0.146232	-7.64794	2.04e-14	1.7e-13
CCG006732	154.348	-1.95512	0.336381	-5.81223	6.16e-09	3.33e-08
CCG006738	345.732	-3.40436	0.270176	-12.6006	2.1e-36	5.02e-35
CCG006740	1195.06	-1.53742	0.172493	-8.91299	4.97e-19	5.49e-18
CCG006743	76.2634	-2.92122	0.479085	-6.09751	1.08e-09	6.28e-09
CCG006744	104.803	1.39717	0.483231	2.89131	0.00383641	0.00941919
CCG006746	7637.91	2.25691	0.303377	7.43929	1.01e-13	8.07e-13
CCG006747	33062.4	3.34884	0.170193	19.6767	3.41e-86	3.39e-84
CCG006748	88.628	-2.06071	0.470966	-4.3755	1.21e-05	4.55e-05
CCG006757	135.691	2.53561	0.430482	5.89017	3.86e-09	2.13e-08
CCG006760	2039.51	-2.08965	0.146224	-14.2907	2.5e-46	8.6e-45
CCG006762	850.904	1.23197	0.178245	6.91167	4.79e-12	3.38e-11
CCG006764	545.71	-2.84745	0.282938	-10.0639	7.98e-24	1.1e-22
CCG006768	416.812	1.03	0.224058	4.597	4.29e-06	1.71e-05
CCG006769	833.478	2.26509	0.232362	9.74809	1.88e-22	2.44e-21
CCG006787	35.4242	8.85025	1.5968	5.5425	2.98e-08	1.51e-07
CCG006792	221.112	-1.03011	0.263194	-3.91388	9.08e-05	0.000300048
CCG006839	2806.61	1.67807	0.139549	12.0249	2.63e-33	5.54e-32
CCG006845	17233.2	2.77107	0.132097	20.9775	1.05e-97	1.38e-95
CCG006856	50.6335	-1.96897	0.597482	-3.29544	0.00098266	0.00272815
CCG006862	5029.16	-1.262	0.149895	-8.41922	3.79e-17	3.77e-16
CCG006866	2287.58	-2.28969	0.176646	-12.9621	2.01e-38	5.23e-37
CCG006869	5473.62	1.42277	0.158446	8.97951	2.72e-19	3.04e-18
CCG006870	99.1565	1.19558	0.373221	3.20342	0.00135807	0.00366288
CCG006878	55.1688	-1.89392	0.522988	-3.62135	0.000293073	0.000892226
CCG006881	5228.35	-1.35953	0.196854	-6.90629	4.98e-12	3.5e-11
CCG006882	477.539	-2.32526	0.242614	-9.58418	9.32e-22	1.17e-20
CCG006886	287.372	-1.50125	0.241473	-6.21704	5.07e-10	3.04e-09
CCG006889	5556.56	2.41407	0.183546	13.1524	1.65e-39	4.56e-38
CCG006890	5272.08	1.40991	0.164476	8.57214	1.02e-17	1.05e-16
CCG006911	100.792	1.70062	0.376116	4.52153	6.14e-06	2.4e-05
CCG006912	9.33875	-6.41521	1.83863	-3.48913	0.00048459	0.00141891
CCG006919	137.763	-2.85546	0.385979	-7.39795	1.38e-13	1.09e-12
CCG006922	995.829	-2.50012	0.174158	-14.3554	9.85e-47	3.4e-45
CCG006923	14219.6	2.91899	0.125844	23.1953	5.08e-119	1.18e-116
CCG006924	2376.98	3.42102	0.683771	5.00316	5.64e-07	2.49e-06
CCG006932	1679.96	-2.14607	0.15638	-13.7234	7.35e-43	2.28e-41
CCG006933	2911.65	-1.52101	0.146038	-10.4152	2.11e-25	3.16e-24
CCG006936	90.8286	-1.62687	0.456514	-3.56368	0.000365688	0.00109618
CCG006937	366.967	-1.58912	0.234535	-6.77562	1.24e-11	8.43e-11
CCG006945	4039.98	1.25775	0.190095	6.61642	3.68e-11	2.42e-10
CCG006950	2592.28	1.47486	0.190875	7.72686	1.1e-14	9.39e-14
CCG006952	9330.01	2.3308	0.154225	15.113	1.33e-51	5.48e-50
CCG006956	11886.1	1.51047	0.162612	9.28881	1.56e-20	1.85e-19
CCG006958	530.784	-1.16427	0.198297	-5.87134	4.32e-09	2.37e-08
CCG006959	495.909	-1.82549	0.225711	-8.08776	6.08e-16	5.63e-15
CCG006960	1194.37	-2.17562	0.219258	-9.92268	3.32e-23	4.47e-22
CCG006964	4795.29	-2.02915	0.174814	-11.6075	3.78e-31	7.25e-30
CCG006966	67.3398	-1.79413	0.531129	-3.37796	0.000730254	0.00207509
CCG006970	976.163	-1.22427	0.172804	-7.08475	1.39e-12	1.02e-11
CCG006974	148.538	2.27523	0.332167	6.84965	7.4e-12	5.15e-11
CCG006977	201.377	2.2955	0.28017	8.19322	2.54e-16	2.4e-15
CCG006985	192.835	-1.74559	0.43602	-4.00346	6.24e-05	0.000211245
CCG006986	718.647	-2.92405	0.278118	-10.5137	7.47e-26	1.14e-24
CCG006994	323.52	-1.46671	0.262426	-5.58902	2.28e-08	1.17e-07
CCG006997	1115.82	3.41549	0.290613	11.7527	6.84e-32	1.35e-30
CCG006998	1396.22	1.28337	0.291518	4.40236	1.07e-05	4.05e-05
CCG007006	93.0731	-1.35629	0.418621	-3.2399	0.0011957	0.00326055
CCG007007	14.2838	-4.54826	1.42204	-3.1984	0.00138192	0.00371998
CCG007010	1580.38	2.97245	0.219854	13.5201	1.19e-41	3.54e-40
CCG007018	2699.84	-1.72999	0.152478	-11.3458	7.78e-30	1.42e-28
CCG007021	12.274	7.32158	1.80144	4.0643	4.82e-05	0.000165662
CCG007022	479.212	6.63167	0.373862	17.7383	2.12e-70	1.42e-68
CCG007043	52.8954	-2.423	0.53255	-4.5498	5.37e-06	2.12e-05
CCG007044	768.072	3.55248	0.230047	15.4424	8.49e-54	3.71e-52
CCG007046	8448.66	1.82972	0.151029	12.1151	8.79e-34	1.9e-32
CCG007047	281.005	1.50313	0.262224	5.73226	9.91e-09	5.26e-08
CCG007048	27.9947	4.17723	0.824955	5.06358	4.11e-07	1.85e-06
CCG007049	16.3397	2.92413	0.964977	3.03025	0.00244348	0.00626643
CCG007051	321.65	-2.05601	0.299775	-6.8585	6.96e-12	4.85e-11
CCG007054	10950.8	1.33299	0.173201	7.6962	1.4e-14	1.18e-13
CCG007057	35.6063	3.43419	0.909256	3.77693	0.000158776	0.000505242
CCG007058	51.9591	-4.04061	0.66364	-6.08856	1.14e-09	6.62e-09
CCG007060	628.956	-2.46798	0.27152	-9.08948	9.95e-20	1.14e-18
CCG007079	1170.69	-1.22549	0.237489	-5.16017	2.47e-07	1.14e-06
CCG007084	2736.95	-1.10412	0.200058	-5.519	3.41e-08	1.72e-07
CCG007085	3362.87	-1.7574	0.159139	-11.0432	2.37e-28	4.04e-27
CCG007103	341.286	-1.23384	0.251101	-4.91371	8.94e-07	3.87e-06
CCG007107	657.352	2.53953	0.248285	10.2283	1.48e-24	2.12e-23
CCG007108	227.293	-2.09064	0.372472	-5.61289	1.99e-08	1.03e-07
CCG007109	1226.62	-2.50997	0.16983	-14.7793	1.99e-49	7.59e-48
CCG007110	896.738	1.61293	0.196783	8.1965	2.47e-16	2.33e-15
CCG007118	1012.61	-1.00546	0.258663	-3.88717	0.000101421	0.000332884
CCG007128	1848.01	1.36843	0.260586	5.25134	1.51e-07	7.13e-07
CCG007130	162.5	2.87259	0.334503	8.58763	8.88e-18	9.17e-17
CCG007141	13095.2	-1.04016	0.148046	-7.02596	2.13e-12	1.54e-11
CCG007142	2584.61	-1.55781	0.174103	-8.94763	3.63e-19	4.03e-18
CCG007148	140.753	-1.99093	0.327483	-6.07948	1.21e-09	6.98e-09
CCG007149	172.547	-1.94919	0.30494	-6.39203	1.64e-10	1.02e-09
CCG007157	21.3556	5.04252	1.10058	4.58169	4.61e-06	1.83e-05
CCG007163	814.58	1.32833	0.19965	6.65327	2.87e-11	1.9e-10
CCG007175	52.0151	4.57485	0.671555	6.81232	9.6e-12	6.59e-11
CCG007180	175.749	-2.53395	0.414214	-6.11748	9.51e-10	5.56e-09
CCG007183	68.3056	1.68753	0.469462	3.59461	0.000324879	0.000981394
CCG007184	349.226	1.30505	0.236987	5.50685	3.65e-08	1.83e-07
CCG007185	128.639	2.01927	0.398024	5.07325	3.91e-07	1.76e-06
CCG007186	13249.3	2.7867	0.163076	17.0883	1.81e-65	1.07e-63
CCG007190	234.905	-1.53157	0.436544	-3.50839	0.000450826	0.00132634
CCG007199	185.751	2.97986	0.362735	8.21498	2.12e-16	2.01e-15
CCG007200	376.897	-1.38995	0.270943	-5.13005	2.9e-07	1.33e-06
CCG007204	134.1	-1.18202	0.351396	-3.36379	0.000768795	0.00217765
CCG007210	6490.67	1.11135	0.133955	8.29645	1.07e-16	1.04e-15
CCG007211	1644.81	1.02651	0.14718	6.97453	3.07e-12	2.2e-11
CCG007218	254.536	-1.54349	0.259389	-5.9505	2.67e-09	1.5e-08
CCG007224	328.331	-1.09826	0.265048	-4.14361	3.42e-05	0.000120049
CCG007228	505.773	5.63869	0.379543	14.8565	6.31e-50	2.47e-48
CCG007233	1013.98	-1.54352	0.185187	-8.33492	7.76e-17	7.58e-16
CCG007245	190.108	1.23815	0.350865	3.52884	0.000417392	0.00123698
CCG007246	362.106	-1.27022	0.226764	-5.60149	2.13e-08	1.09e-07
CCG007247	2323.14	1.10352	0.171682	6.42773	1.3e-10	8.16e-10
CCG007249	1897.57	1.49745	0.172154	8.69829	3.37e-18	3.56e-17
CCG007252	1727.59	4.42601	0.197653	22.3928	4.62e-111	8.42e-109
CCG007256	19677.5	-2.41372	0.167187	-14.4373	3.02e-47	1.06e-45
CCG007257	553.378	-1.85256	0.250318	-7.40083	1.35e-13	1.07e-12
CCG007260	540.095	5.14603	0.268625	19.1569	8.47e-82	7.56e-80
CCG007262	73.2485	1.86691	0.457346	4.08205	4.46e-05	0.000154236
CCG007265	171.648	5.00292	0.469295	10.6605	1.56e-26	2.48e-25
CCG007270	8852.97	1.56584	0.281896	5.55468	2.78e-08	1.41e-07
CCG007276	25.5312	-4.36496	1.02401	-4.26263	2.02e-05	7.34e-05
CCG007280	153.444	2.51361	0.321399	7.82084	5.25e-15	4.58e-14
CCG007284	2982.68	-1.39588	0.176581	-7.90507	2.68e-15	2.39e-14
CCG007287	341.227	1.42902	0.224921	6.35344	2.11e-10	1.3e-09
CCG007290	2114.66	-1.34165	0.195993	-6.84541	7.63e-12	5.29e-11
CCG007298	403.621	1.35142	0.229591	5.88624	3.95e-09	2.18e-08
CCG007307	9239.86	1.35601	0.161171	8.41348	3.98e-17	3.95e-16
CCG007308	3424.52	1.89659	0.170636	11.1148	1.06e-28	1.84e-27
CCG007324	2293.93	2.2521	0.289259	7.78576	6.93e-15	6e-14
CCG007330	70.8796	-1.88873	0.461108	-4.09606	4.2e-05	0.000145786
CCG007331	516.54	-1.13754	0.196682	-5.78363	7.31e-09	3.93e-08
CCG007338	607.407	-1.02586	0.201527	-5.09044	3.57e-07	1.62e-06
CCG007354	914.863	-1.54243	0.16847	-9.15553	5.41e-20	6.26e-19
CCG007373	2373.96	-1.72255	0.14307	-12.0399	2.19e-33	4.65e-32
CCG007377	3969.15	-1.87977	0.16797	-11.1911	4.51e-29	7.97e-28
CCG007389	1802.17	1.10315	0.156113	7.06634	1.59e-12	1.16e-11
CCG007395	83.7993	-2.15655	0.444477	-4.85188	1.22e-06	5.2e-06
CCG007396	268.833	-1.22498	0.267531	-4.57884	4.68e-06	1.86e-05
CCG007400	53.4063	-2.61348	0.565281	-4.62334	3.78e-06	1.52e-05
CCG007401	337.443	-3.05693	0.286841	-10.6573	1.61e-26	2.56e-25
CCG007402	108.161	-3.68651	0.489481	-7.53146	5.02e-14	4.09e-13
CCG007403	592.06	-2.50716	0.279665	-8.96487	3.11e-19	3.46e-18
CCG007412	2038.72	2.63306	0.282725	9.31312	1.24e-20	1.48e-19
CCG007419	939.769	-1.23029	0.172405	-7.13605	9.6e-13	7.16e-12
CCG007424	573.248	-1.40417	0.267139	-5.25632	1.47e-07	6.95e-07
CCG007431	993.15	2.0176	0.171382	11.7726	5.4e-32	1.08e-30
CCG007432	119.257	-1.47049	0.408036	-3.60383	0.000313567	0.00094864
CCG007455	6110.93	1.3971	0.150697	9.27094	1.85e-20	2.18e-19
CCG007457	7817.54	1.84627	0.209712	8.8038	1.32e-18	1.43e-17
CCG007460	17942.4	2.21055	0.141975	15.5701	1.16e-54	5.17e-53
CCG007478	21488.7	-1.0112	0.166917	-6.05811	1.38e-09	7.93e-09
CCG007480	1049.09	-1.0305	0.173034	-5.95546	2.59e-09	1.45e-08
CCG007486	5954.24	2.93306	0.267162	10.9786	4.84e-28	8.17e-27
CCG007488	1853.58	-1.94879	0.148254	-13.145	1.82e-39	5e-38
CCG007492	853.3	1.87654	0.221161	8.48495	2.16e-17	2.18e-16
CCG007493	6786.21	1.16268	0.145764	7.97647	1.51e-15	1.36e-14
CCG007494	326.145	2.23909	0.248772	9.00058	2.25e-19	2.51e-18
CCG007495	14.5021	-3.50186	1.16316	-3.01064	0.002607	0.00664668
CCG007496	618.257	-1.99541	0.259087	-7.70171	1.34e-14	1.14e-13
CCG007497	2345.55	1.26716	0.140428	9.02353	1.82e-19	2.05e-18
CCG007500	29.3457	3.86458	0.772938	4.99985	5.74e-07	2.54e-06
CCG007501	3793.69	1.87228	0.150648	12.4281	1.84e-35	4.28e-34
CCG007503	1018	-4.02156	0.223206	-18.0173	1.43e-72	1.02e-70
CCG007504	889.149	-2.34836	0.183185	-12.8196	1.27e-37	3.21e-36
CCG007513	2787.13	1.55987	0.151814	10.2749	9.15e-25	1.32e-23
CCG007516	437.816	-1.42506	0.208654	-6.82975	8.51e-12	5.87e-11
CCG007517	900.633	4.48736	1.34734	3.33053	0.000866805	0.00243325
CCG007518	103.575	3.69406	0.524973	7.03666	1.97e-12	1.43e-11
CCG007519	2562.93	-2.0224	0.169369	-11.9408	7.25e-33	1.5e-31
CCG007526	1220.95	-2.81834	0.231898	-12.1533	5.51e-34	1.21e-32
CCG007527	5262.46	-2.01796	0.13353	-15.1124	1.34e-51	5.52e-50
CCG007529	206.467	-2.36181	0.330983	-7.13576	9.63e-13	7.17e-12
CCG007536	111.594	-1.99284	0.447616	-4.45211	8.5e-06	3.26e-05
CCG007560	20598.2	-1.93255	0.184586	-10.4696	1.19e-25	1.81e-24
CCG007564	2005.18	-2.23386	0.158163	-14.1238	2.71e-45	9.05e-44
CCG007575	154.755	-1.03202	0.300154	-3.43831	0.000585354	0.00168992
CCG007577	1148.48	1.92081	0.183414	10.4725	1.15e-25	1.76e-24
CCG007578	3831.16	2.08499	0.184814	11.2816	1.62e-29	2.91e-28
CCG007583	56.1561	-1.96914	0.601232	-3.27518	0.00105596	0.00291021
CCG007590	514.667	2.45058	0.29651	8.26475	1.4e-16	1.35e-15
CCG007591	556.343	1.85734	0.201737	9.20676	3.36e-20	3.92e-19
CCG007593	6119.65	-2.29425	0.154822	-14.8187	1.11e-49	4.29e-48
CCG007597	15174.6	-1.35683	0.155063	-8.7502	2.13e-18	2.28e-17
CCG007603	175.598	-1.6159	0.305687	-5.28612	1.25e-07	5.96e-07
CCG007605	2116.13	1.29887	0.213353	6.08789	1.14e-09	6.65e-09
CCG007610	989.804	-3.11026	0.227293	-13.6839	1.27e-42	3.89e-41
CCG007611	269.483	3.07742	0.270734	11.367	6.11e-30	1.12e-28
CCG007612	279.806	2.9722	0.289366	10.2714	9.48e-25	1.37e-23
CCG007613	699.818	3.13118	0.23991	13.0515	6.23e-39	1.66e-37
CCG007614	329.916	2.84367	0.239755	11.8607	1.89e-32	3.84e-31
CCG007633	128.636	-3.15989	0.454014	-6.95989	3.41e-12	2.43e-11
CCG007639	73.0542	-2.47495	0.524441	-4.71922	2.37e-06	9.77e-06
CCG007643	655.708	-4.17555	0.245848	-16.9843	1.07e-64	6.3e-63
CCG007646	179.372	2.1765	0.382337	5.69262	1.25e-08	6.57e-08
CCG007648	707.886	1.57644	0.226316	6.96567	3.27e-12	2.33e-11
CCG007651	2140.12	-1.40537	0.256642	-5.476	4.35e-08	2.16e-07
CCG007654	326.754	-3.25315	0.374513	-8.68636	3.74e-18	3.95e-17
CCG007662	1823.98	-1.58622	0.18584	-8.53537	1.4e-17	1.42e-16
CCG007665	761.788	-1.10231	0.191006	-5.77105	7.88e-09	4.22e-08
CCG007669	1205.19	-1.74898	0.210386	-8.31317	9.32e-17	9.08e-16
CCG007674	1097.23	1.28568	0.171562	7.494	6.68e-14	5.38e-13
CCG007678	1622.44	-1.68236	0.159237	-10.5651	4.32e-26	6.71e-25
CCG007687	53.8351	1.70565	0.509952	3.34473	0.000823639	0.00232255
CCG007688	75.1546	-1.24375	0.4131	-3.01076	0.00260591	0.00664468
CCG007691	630.831	5.21799	0.37629	13.8669	1e-43	3.22e-42
CCG007692	22.6932	3.63117	0.904498	4.01457	5.96e-05	0.000202032
CCG007694	6870.91	4.17435	0.158277	26.3738	2.74e-153	1.32e-150
CCG007697	96.5281	1.31648	0.415536	3.16815	0.00153413	0.00409746
CCG007698	1269.65	-1.00913	0.279398	-3.6118	0.000304078	0.000922064
CCG007726	18770.3	-2.66294	0.196883	-13.5255	1.11e-41	3.29e-40
CCG007744	9010.33	1.20847	0.277761	4.35074	1.36e-05	5.05e-05
CCG007753	6518.21	2.62196	0.138605	18.9168	8.29e-80	7.09e-78
CCG007759	2442.16	-1.86257	0.173854	-10.7134	8.81e-27	1.41e-25
CCG007760	41.2917	-4.47524	0.863996	-5.1797	2.22e-07	1.03e-06
CCG007761	6893.23	1.11309	0.133297	8.35041	6.8e-17	6.66e-16
CCG007762	24.6956	-5.34015	1.21817	-4.38373	1.17e-05	4.39e-05
CCG007763	4356.62	-2.25474	0.176192	-12.7971	1.7e-37	4.28e-36
CCG007768	7520.49	-3.96555	0.180587	-21.9592	7.07e-107	1.16e-104
CCG007777	4764.5	1.7579	0.144992	12.1241	7.87e-34	1.71e-32
CCG007781	34.9533	-4.51715	0.936	-4.82602	1.39e-06	5.9e-06
CCG007782	3121.13	1.25991	0.157666	7.99102	1.34e-15	1.21e-14
CCG007783	4730.15	-1.76538	0.138868	-12.7126	5.03e-37	1.24e-35
CCG007785	40.9549	2.18169	0.62841	3.47176	0.000517056	0.00150486
CCG007787	319.261	-1.32584	0.298842	-4.4366	9.14e-06	3.49e-05
CCG007790	1834.09	-1.13406	0.190085	-5.96605	2.43e-09	1.37e-08
CCG007791	52.0568	-2.07004	0.619191	-3.34313	0.000828381	0.00233423
CCG007795	1873.48	1.68268	0.157974	10.6516	1.71e-26	2.71e-25
CCG007797	72.0412	-2.16567	0.451665	-4.79486	1.63e-06	6.84e-06
CCG007806	5330.43	1.45957	0.148285	9.84301	7.35e-23	9.76e-22
CCG007813	105.398	1.42413	0.376577	3.78178	0.000155712	0.000496416
CCG007821	2516.61	1.33739	0.21757	6.14697	7.9e-10	4.66e-09
CCG007840	177.476	-1.32484	0.286503	-4.62419	3.76e-06	1.51e-05
CCG007841	1447.83	1.80726	0.172598	10.471	1.17e-25	1.78e-24
CCG007843	540.695	3.59611	0.366515	9.81164	1e-22	1.32e-21
CCG007847	1751.07	1.01081	0.270322	3.73929	0.000184541	0.000581238
CCG007848	745.917	2.25675	0.338218	6.67247	2.52e-11	1.68e-10
CCG007849	1525.95	1.69088	0.24628	6.86571	6.62e-12	4.61e-11
CCG007851	842.449	1.6381	0.286928	5.7091	1.14e-08	5.99e-08
CCG007868	17.974	-2.96074	1.00565	-2.9441	0.00323896	0.00807633
CCG007869	149.48	-1.12336	0.305392	-3.67842	0.000234681	0.000727005
CCG007873	320.425	-1.66398	0.235912	-7.05337	1.75e-12	1.27e-11
CCG007874	2426.69	2.43145	0.267418	9.09231	9.7e-20	1.11e-18
CCG007875	1289.31	2.07615	0.26988	7.69287	1.44e-14	1.21e-13
CCG007888	180.118	-1.78431	0.369713	-4.82619	1.39e-06	5.9e-06
CCG007893	1601.55	3.07755	0.185475	16.5928	7.85e-62	4.27e-60
CCG007895	1192.13	1.08048	0.191118	5.65347	1.57e-08	8.18e-08
CCG007896	2339.09	1.70992	0.145594	11.7445	7.54e-32	1.49e-30
CCG007909	44901.5	2.63723	0.227208	11.6071	3.79e-31	7.27e-30
CCG007930	14.9142	2.99606	1.00404	2.98399	0.00284512	0.00718047
CCG007933	734.658	-1.11148	0.237466	-4.68058	2.86e-06	1.17e-05
CCG007938	2264.3	2.47262	0.157685	15.6808	2.05e-55	9.31e-54
CCG007941	816.023	-1.0124	0.193966	-5.21948	1.79e-07	8.39e-07
CCG007946	1669.04	1.80135	0.22917	7.86033	3.83e-15	3.37e-14
CCG007948	302.042	1.67714	0.365675	4.58643	4.51e-06	1.79e-05
CCG007949	637.844	1.51079	0.294432	5.13121	2.88e-07	1.32e-06
CCG007951	2518.18	4.98902	0.249619	19.9865	7.21e-89	7.6e-87
CCG007956	9793.87	1.96823	0.13358	14.7344	3.87e-49	1.47e-47
CCG007961	13057.4	-1.81088	0.19437	-9.31667	1.2e-20	1.44e-19
CCG007966	4888.25	1.47131	0.175508	8.38316	5.15e-17	5.09e-16
CCG007971	4606.91	-2.21804	0.166217	-13.3443	1.28e-40	3.68e-39
CCG007987	14244.9	1.36972	0.160115	8.55461	1.18e-17	1.21e-16
CCG007988	7248.29	2.7438	0.140403	19.5424	4.79e-85	4.63e-83
CCG007989	6046.07	1.04792	0.151138	6.93358	4.1e-12	2.91e-11
CCG007991	5332.63	1.26887	0.211159	6.00907	1.87e-09	1.06e-08
CCG007992	21.3762	6.66001	1.62295	4.10366	4.07e-05	0.000141323
CCG007994	2105.82	5.59592	0.19272	29.0365	2.28e-185	2.3e-182
CCG007996	3917.35	1.67494	0.201849	8.29798	1.06e-16	1.03e-15
CCG007997	580.349	1.24798	0.222734	5.60301	2.11e-08	1.09e-07
CCG007999	680.688	1.17165	0.178146	6.57693	4.8e-11	3.13e-10
CCG008007	748.797	2.93346	0.225735	12.9952	1.3e-38	3.44e-37
CCG008008	478.975	3.72757	0.278848	13.3678	9.33e-41	2.7e-39
CCG008009	4433.09	2.99667	0.159736	18.7601	1.6e-78	1.33e-76
CCG008013	612.663	-1.0921	0.186977	-5.84084	5.19e-09	2.83e-08
CCG008014	215.196	-1.02666	0.269549	-3.80879	0.000139648	0.000449458
CCG008017	1205.99	-1.31559	0.168558	-7.80498	5.95e-15	5.18e-14
CCG008018	5474.26	2.21364	0.134169	16.4989	3.74e-61	1.98e-59
CCG008022	93.3465	-1.52661	0.459594	-3.32165	0.000894883	0.00250353
CCG008027	90.081	-1.99979	0.459529	-4.35183	1.35e-05	5.03e-05
CCG008042	3991.92	-2.02517	0.15435	-13.1206	2.51e-39	6.82e-38
CCG008043	49.7957	-3.82652	0.643983	-5.94196	2.82e-09	1.58e-08
CCG008048	232.361	2.8683	0.317804	9.0254	1.79e-19	2.01e-18
CCG008056	2958.66	1.39955	0.141524	9.88917	4.64e-23	6.21e-22
CCG008060	238.915	3.19604	0.300577	10.633	2.09e-26	3.3e-25
CCG008063	842.656	-2.06608	0.207789	-9.94316	2.7e-23	3.65e-22
CCG008066	1671.68	1.51061	0.202191	7.47118	7.95e-14	6.37e-13
CCG008067	4718.66	2.52813	0.15964	15.8365	1.74e-56	8.19e-55
CCG008068	4294.46	1.8698	0.254206	7.35546	1.9e-13	1.49e-12
CCG008076	217.55	-1.817	0.27165	-6.68876	2.25e-11	1.5e-10
CCG008077	1230.16	-1.11621	0.199368	-5.59871	2.16e-08	1.11e-07
CCG008087	74.0894	4.39675	0.547227	8.03461	9.39e-16	8.6e-15
CCG008088	8018.73	1.23964	0.21484	5.77005	7.92e-09	4.24e-08
CCG008089	1648.28	-1.54766	0.166153	-9.31463	1.22e-20	1.47e-19
CCG008094	9295.95	-1.30904	0.157009	-8.3374	7.59e-17	7.43e-16
CCG008103	421.513	-1.32027	0.254536	-5.18697	2.14e-07	9.91e-07
CCG008109	1323.07	-1.1411	0.194721	-5.86018	4.62e-09	2.53e-08
CCG008128	182.486	3.50879	0.335931	10.445	1.54e-25	2.32e-24
CCG008129	68.6585	-2.81197	0.504142	-5.57773	2.44e-08	1.25e-07
CCG008130	23026	-1.67113	0.177702	-9.40411	5.25e-21	6.41e-20
CCG008141	3145.94	2.54343	0.172948	14.7063	5.87e-49	2.21e-47
CCG008145	12289.9	-2.25904	0.137578	-16.4201	1.37e-60	7.2e-59
CCG008149	6300.25	1.69313	0.146743	11.5381	8.48e-31	1.61e-29
CCG008150	231.983	-1.30495	0.271409	-4.80806	1.52e-06	6.43e-06
CCG008153	522.105	-1.87905	0.233844	-8.03551	9.32e-16	8.54e-15
CCG008154	10974.7	1.05624	0.243202	4.34306	1.41e-05	5.22e-05
CCG008160	6851.67	5.57146	0.151413	36.7964	2.11e-296	1.56e-292
CCG008182	489.889	-1.24118	0.285784	-4.34305	1.41e-05	5.22e-05
CCG008183	1631.61	-3.46061	0.167879	-20.6137	2.07e-94	2.46e-92
CCG008196	535.024	2.40614	0.257625	9.33969	9.66e-21	1.16e-19
CCG008208	34.2973	2.52841	0.701537	3.60409	0.000313243	0.000947788
CCG008209	4179.63	2.4769	0.169578	14.6063	2.56e-48	9.43e-47
CCG008227	79.7942	2.48377	0.483183	5.14043	2.74e-07	1.26e-06
CCG008229	935.272	2.55239	0.209956	12.1568	5.28e-34	1.16e-32
CCG008241	57.6472	-3.58523	0.611123	-5.86663	4.45e-09	2.44e-08
CCG008245	286.158	1.1333	0.259616	4.36529	1.27e-05	4.75e-05
CCG008249	86.2698	1.8702	0.388496	4.81396	1.48e-06	6.25e-06
CCG008250	13.6939	3.32353	1.14167	2.91111	0.00360148	0.00889545
CCG008258	50.919	4.2771	0.626723	6.82455	8.82e-12	6.08e-11
CCG008260	20.5944	3.66035	1.165	3.14193	0.00167837	0.00445329
CCG008261	1775.94	2.06692	0.15145	13.6475	2.09e-42	6.36e-41
CCG008266	1257.78	1.37027	0.169748	8.0724	6.89e-16	6.37e-15
CCG008272	2551.75	1.77372	0.156321	11.3466	7.71e-30	1.4e-28
CCG008277	135.872	2.41791	0.347801	6.952	3.6e-12	2.56e-11
CCG008288	57.7653	-2.40256	0.508648	-4.72342	2.32e-06	9.58e-06
CCG008290	1061.23	1.1605	0.202321	5.73593	9.7e-09	5.15e-08
CCG008292	1252.67	-4.79692	0.211817	-22.6465	1.51e-113	2.97e-111
CCG008294	375.726	1.8958	0.256921	7.37893	1.6e-13	1.25e-12
CCG008298	159.211	-1.62682	0.3234	-5.03036	4.9e-07	2.18e-06
[truncated: 4,002 more rows]

## Sheet: Table S3-4
Table S3-4. The differentially expressed genes (DEGs) of 24 hour vs Control
[truncated: 7,661 more rows]

[truncated: 7 more sheets: Table S3-5, Table S3-6, Table S3-7, Table S3-8, Table S3-9, Table S3-10, Table S3-11]
