# Supplementary material for: Transcriptome and structure analysis in root of Casuarina equisetifolia under NaCl treatment
Source: PeerJ. 2021 Sep 22;9:e12133. doi: 10.7717/peerj.12133 (PMC8464194; doi:10.7717/peerj.12133)
Supplement: Supplemental Information 6 — Gene ontology of total DEGs in Table S4 −1. Gene ontology analysis at each of the time points are detailed in Table S4 −2 to Table S4 −5. [file peerj-09-12133-s006.xlsx]

## Sheet: Table S4-1
Table S4-1. Gene ontology of the differentially expressed genes (DEGs)
GO_acc	term_type	Term	queryitem	querytotal	refitem	reftotal	pvalue	FDR	entries
GO:0071554	P	cell wall organization or biogenesis	279	9153	470	23397	1.5e-18	2.2e-14	// CCG013954 // CCG025717 // CCG023899 // CCG011068 // CCG027642 // CCG029179 // CCG029274 // CCG007062 // CCG023731 // CCG003884 // CCG002907 // CCG010968 // CCG014370 // CCG018269 // CCG002871 // CCG023728 // CCG006660 // CCG021387 // CCG004057 // CCG027824 // CCG014980 // CCG012871 // CCG016391 // CCG027822 // CCG016792 // CCG026766 // CCG027829 // CCG004886 // CCG004058 // CCG004452 // CCG000…
GO:0042744	P	hydrogen peroxide catabolic process	93	9153	130	23397	8.4e-14	6.1e-10	// CCG027642 // CCG000922 // CCG014370 // CCG000125 // CCG000124 // CCG010374 // CCG005419 // CCG014175 // CCG020952 // CCG020955 // CCG010578 // CCG010314 // CCG000339 // CCG023924 // CCG024749 // CCG024748 // CCG012178 // CCG012177 // CCG012175 // CCG029398 // CCG016481 // CCG009430 // CCG014691 // CCG002890 // CCG002892 // CCG002895 // CCG002894 // CCG002897 // CCG002896 // CCG002899 // CCG009…
GO:0042743	P	hydrogen peroxide metabolic process	96	9153	139	23397	1e-12	5.1e-09	// CCG027642 // CCG000922 // CCG014370 // CCG000125 // CCG000124 // CCG010374 // CCG005419 // CCG014175 // CCG020952 // CCG020955 // CCG010578 // CCG010314 // CCG000339 // CCG023924 // CCG014454 // CCG014452 // CCG024749 // CCG024748 // CCG012178 // CCG012177 // CCG012175 // CCG029398 // CCG014250 // CCG016481 // CCG009430 // CCG014691 // CCG002890 // CCG002892 // CCG002895 // CCG002894 // CCG002…
GO:0071555	P	cell wall organization	186	9153	319	23397	4.9e-12	1.8e-08	// CCG013954 // CCG025717 // CCG023899 // CCG027642 // CCG029179 // CCG029274 // CCG023731 // CCG002907 // CCG010968 // CCG014370 // CCG018269 // CCG016441 // CCG006660 // CCG004057 // CCG027824 // CCG025716 // CCG012871 // CCG016391 // CCG027822 // CCG016792 // CCG026766 // CCG027829 // CCG004886 // CCG004058 // CCG004452 // CCG000994 // CCG010767 // CCG011361 // CCG029580 // CCG009293 // CCG013…
GO:0071669	P	plant-type cell wall organization or biogenesis	114	9153	176	23397	6.7e-12	2e-08	// CCG013954 // CCG027642 // CCG029274 // CCG014370 // CCG018269 // CCG002871 // CCG004057 // CCG025716 // CCG012871 // CCG009913 // CCG027822 // CCG009696 // CCG010767 // CCG027635 // CCG020893 // CCG029580 // CCG009293 // CCG008811 // CCG000339 // CCG023924 // CCG019670 // CCG007059 // CCG027521 // CCG006342 // CCG014691 // CCG010085 // CCG020922 // CCG026727 // CCG011370 // CCG015901 // CCG020…
GO:0042546	P	cell wall biogenesis	109	9153	167	23397	9.3e-12	2.3e-08	// CCG013954 // CCG025717 // CCG016624 // CCG029274 // CCG018269 // CCG002871 // CCG021387 // CCG025716 // CCG016391 // CCG027822 // CCG016792 // CCG009696 // CCG004058 // CCG010767 // CCG027635 // CCG020893 // CCG029580 // CCG008811 // CCG007059 // CCG027521 // CCG000241 // CCG020294 // CCG017554 // CCG017555 // CCG017552 // CCG020922 // CCG026727 // CCG011370 // CCG015901 // CCG023899 // CCG006…
GO:0045229	P	external encapsulating structure organization	193	9153	341	23397	7.3e-11	1.5e-07	// CCG013954 // CCG007320 // CCG025717 // CCG023899 // CCG027642 // CCG029179 // CCG029274 // CCG023731 // CCG002907 // CCG010968 // CCG014370 // CCG018269 // CCG016441 // CCG006660 // CCG004057 // CCG027824 // CCG025716 // CCG012871 // CCG016391 // CCG027822 // CCG016792 // CCG026766 // CCG027829 // CCG004886 // CCG004058 // CCG004452 // CCG000994 // CCG010767 // CCG011361 // CCG029580 // CCG009…
GO:0098754	P	detoxification	149	9153	253	23397	2.1e-10	3.9e-07	// CCG020651 // CCG004818 // CCG008824 // CCG027642 // CCG013813 // CCG000922 // CCG014370 // CCG018479 // CCG024438 // CCG000125 // CCG000124 // CCG005349 // CCG010374 // CCG005419 // CCG014175 // CCG026105 // CCG020952 // CCG020955 // CCG010578 // CCG009291 // CCG026388 // CCG000339 // CCG023924 // CCG024749 // CCG024748 // CCG001843 // CCG012178 // CCG012177 // CCG012175 // CCG017983 // CCG029…
GO:1990748	P	cellular detoxification	144	9153	244	23397	3.4e-10	5e-07	// CCG020651 // CCG004818 // CCG008824 // CCG027642 // CCG013813 // CCG000922 // CCG014370 // CCG018479 // CCG000125 // CCG000124 // CCG005349 // CCG010374 // CCG005419 // CCG014175 // CCG026105 // CCG020952 // CCG020955 // CCG010578 // CCG009291 // CCG026388 // CCG000339 // CCG023924 // CCG024749 // CCG024748 // CCG001843 // CCG012178 // CCG012177 // CCG012175 // CCG017983 // CCG029399 // CCG029…
GO:0098869	P	cellular oxidant detoxification	144	9153	244	23397	3.4e-10	5e-07	// CCG020651 // CCG004818 // CCG008824 // CCG027642 // CCG013813 // CCG000922 // CCG014370 // CCG018479 // CCG000125 // CCG000124 // CCG005349 // CCG010374 // CCG005419 // CCG014175 // CCG026105 // CCG020952 // CCG020955 // CCG010578 // CCG009291 // CCG026388 // CCG000339 // CCG023924 // CCG024749 // CCG024748 // CCG001843 // CCG012178 // CCG012177 // CCG012175 // CCG017983 // CCG029399 // CCG029…
GO:0044036	P	cell wall macromolecule metabolic process	79	9153	119	23397	1.9e-09	2.5e-06	// CCG023899 // CCG020294 // CCG021387 // CCG018228 // CCG003650 // CCG029138 // CCG027829 // CCG014736 // CCG029274 // CCG008744 // CCG009217 // CCG025020 // CCG017884 // CCG016441 // CCG016959 // CCG023728 // CCG022173 // CCG017311 // CCG004452 // CCG016391 // CCG004201 // CCG017963 // CCG024804 // CCG009696 // CCG014649 // CCG004058 // CCG002011 // CCG007840 // CCG021847 // CCG017555 // CCG002…
GO:0009636	P	response to toxic substance	154	9153	271	23397	3.6e-09	4.4e-06	// CCG020651 // CCG004818 // CCG008824 // CCG027642 // CCG013813 // CCG000922 // CCG014370 // CCG018479 // CCG024438 // CCG000125 // CCG000124 // CCG022152 // CCG005349 // CCG010374 // CCG005419 // CCG014175 // CCG026105 // CCG020952 // CCG020955 // CCG010578 // CCG009291 // CCG026388 // CCG000339 // CCG023924 // CCG003456 // CCG024749 // CCG024748 // CCG011099 // CCG012178 // CCG012177 // CCG012…
GO:0019748	P	secondary metabolic process	191	9153	353	23397	1.1e-08	1.3e-05	// CCG009757 // CCG010482 // CCG013817 // CCG013816 // CCG013815 // CCG013813 // CCG013812 // CCG010481 // CCG005947 // CCG007320 // CCG004842 // CCG015201 // CCG010478 // CCG011603 // CCG010470 // CCG005419 // CCG006940 // CCG012061 // CCG020955 // CCG005229 // CCG012062 // CCG013096 // CCG013095 // CCG013094 // CCG029773 // CCG006039 // CCG028444 // CCG015547 // CCG008814 // CCG023634 // CCG023…
GO:0072593	P	reactive oxygen species metabolic process	112	9153	189	23397	2e-08	2.1e-05	// CCG004818 // CCG027642 // CCG000922 // CCG014370 // CCG000125 // CCG000124 // CCG005349 // CCG010374 // CCG005419 // CCG014175 // CCG020952 // CCG020955 // CCG010578 // CCG010314 // CCG026388 // CCG000339 // CCG023924 // CCG014454 // CCG014452 // CCG024749 // CCG024748 // CCG012178 // CCG012177 // CCG012175 // CCG029398 // CCG014250 // CCG016481 // CCG009430 // CCG014691 // CCG002890 // CCG002…
GO:0010410	P	hemicellulose metabolic process	59	9153	86	23397	3.2e-08	3.1e-05	// CCG023899 // CCG020294 // CCG021387 // CCG018228 // CCG029138 // CCG027829 // CCG014736 // CCG029274 // CCG008744 // CCG025020 // CCG016441 // CCG017963 // CCG015021 // CCG017311 // CCG022154 // CCG016391 // CCG004201 // CCG016792 // CCG009696 // CCG014649 // CCG004058 // CCG021847 // CCG004452 // CCG020921 // CCG029580 // CCG026804 // CCG022444 // CCG006329 // CCG006328 // CCG004108 // CCG026…
GO:0010383	P	cell wall polysaccharide metabolic process	63	9153	94	23397	4.5e-08	4.1e-05	// CCG023899 // CCG020294 // CCG021387 // CCG018228 // CCG003650 // CCG029138 // CCG027829 // CCG014736 // CCG029274 // CCG008744 // CCG025020 // CCG016441 // CCG016959 // CCG022173 // CCG017311 // CCG022154 // CCG016391 // CCG004201 // CCG017963 // CCG009696 // CCG014649 // CCG004058 // CCG021847 // CCG004452 // CCG015021 // CCG020921 // CCG029580 // CCG026804 // CCG016792 // CCG022444 // CCG006…
GO:0009664	P	plant-type cell wall organization	57	9153	84	23397	9.9e-08	8.6e-05	// CCG009659 // CCG027642 // CCG029274 // CCG009431 // CCG020301 // CCG014370 // CCG018269 // CCG015551 // CCG015552 // CCG015553 // CCG016959 // CCG022173 // CCG012871 // CCG006196 // CCG027822 // CCG017963 // CCG003650 // CCG027840 // CCG014853 // CCG005686 // CCG010314 // CCG020408 // CCG005840 // CCG011361 // CCG018486 // CCG009293 // CCG028384 // CCG001855 // CCG003129 // CCG026301 // CCG008…
GO:0005976	P	polysaccharide metabolic process	197	9153	376	23397	1.6e-07	0.00013	// CCG029177 // CCG025717 // CCG023899 // CCG025716 // CCG029179 // CCG013954 // CCG029274 // CCG007501 // CCG006666 // CCG016441 // CCG013411 // CCG021387 // CCG004057 // CCG027824 // CCG022154 // CCG016391 // CCG016792 // CCG000550 // CCG027829 // CCG004886 // CCG004058 // CCG004452 // CCG000994 // CCG010767 // CCG009115 // CCG009116 // CCG029580 // CCG013412 // CCG022404 // CCG003304 // CCG022…
GO:0009832	P	plant-type cell wall biogenesis	67	9153	105	23397	2.9e-07	0.00023	// CCG013954 // CCG020294 // CCG021387 // CCG003650 // CCG004097 // CCG000903 // CCG006513 // CCG021360 // CCG000904 // CCG024452 // CCG020301 // CCG016616 // CCG003884 // CCG013409 // CCG005163 // CCG018269 // CCG015551 // CCG002871 // CCG015553 // CCG016959 // CCG015552 // CCG022173 // CCG007062 // CCG014980 // CCG027822 // CCG006254 // CCG009696 // CCG004096 // CCG005245 // CCG010767 // CCG027…
GO:0055114	P	oxidation-reduction process	1255	9153	2859	23397	5.2e-07	0.00038	// CCG013868 // CCG007465 // CCG027491 // CCG010161 // CCG013585 // CCG027642 // CCG000650 // CCG016711 // CCG022649 // CCG007199 // CCG018479 // CCG017622 // CCG014777 // CCG002876 // CCG023247 // CCG015531 // CCG012290 // CCG000125 // CCG000124 // CCG004051 // CCG005419 // CCG006434 // CCG014175 // CCG008034 // CCG008997 // CCG002509 // CCG011363 // CCG028692 // CCG013095 // CCG013094 // CCG010…
GO:0018108	P	peptidyl-tyrosine phosphorylation	164	9153	310	23397	7.3e-07	0.00047	// CCG027727 // CCG027844 // CCG018773 // CCG010249 // CCG005493 // CCG010690 // CCG025046 // CCG004952 // CCG002816 // CCG014831 // CCG007966 // CCG016319 // CCG016317 // CCG006869 // CCG022793 // CCG007496 // CCG003991 // CCG007495 // CCG023400 // CCG022567 // CCG005865 // CCG022562 // CCG023880 // CCG008719 // CCG022569 // CCG022568 // CCG012982 // CCG012983 // CCG025450 // CCG005543 // CCG022…
GO:0018212	P	peptidyl-tyrosine modification	164	9153	310	23397	7.3e-07	0.00047	// CCG027727 // CCG027844 // CCG018773 // CCG010249 // CCG005493 // CCG010690 // CCG025046 // CCG004952 // CCG002816 // CCG014831 // CCG007966 // CCG016319 // CCG016317 // CCG006869 // CCG022793 // CCG007496 // CCG003991 // CCG007495 // CCG023400 // CCG022567 // CCG005865 // CCG022562 // CCG023880 // CCG008719 // CCG022569 // CCG022568 // CCG012982 // CCG012983 // CCG025450 // CCG005543 // CCG022…
GO:0033692	P	cellular polysaccharide biosynthetic process	88	9153	149	23397	7.5e-07	0.00047	// CCG013954 // CCG029274 // CCG021387 // CCG004057 // CCG000550 // CCG009696 // CCG010767 // CCG029580 // CCG020194 // CCG020195 // CCG020196 // CCG019675 // CCG019674 // CCG007059 // CCG013512 // CCG027521 // CCG020298 // CCG020294 // CCG017418 // CCG026727 // CCG011370 // CCG015901 // CCG006342 // CCG021360 // CCG020206 // CCG020679 // CCG020678 // CCG022173 // CCG016504 // CCG016501 // CCG007…
GO:0000271	P	polysaccharide biosynthetic process	96	9153	166	23397	9.2e-07	0.00056	// CCG013954 // CCG029274 // CCG021387 // CCG004057 // CCG000550 // CCG009696 // CCG000994 // CCG010767 // CCG029580 // CCG017912 // CCG020194 // CCG020195 // CCG020196 // CCG019675 // CCG019674 // CCG007059 // CCG013512 // CCG027521 // CCG020298 // CCG020294 // CCG028760 // CCG026727 // CCG011370 // CCG015901 // CCG006342 // CCG021360 // CCG020206 // CCG020679 // CCG020678 // CCG010780 // CCG022…
GO:0006979	P	response to oxidative stress	160	9153	303	23397	1.1e-06	0.00067	// CCG020651 // CCG008821 // CCG027642 // CCG000922 // CCG004818 // CCG028897 // CCG014370 // CCG011993 // CCG000125 // CCG000124 // CCG005349 // CCG019804 // CCG010374 // CCG005419 // CCG014175 // CCG020952 // CCG020955 // CCG010578 // CCG009291 // CCG026915 // CCG026388 // CCG023642 // CCG015503 // CCG000339 // CCG023924 // CCG017919 // CCG027522 // CCG028494 // CCG011733 // CCG024749 // CCG024…
GO:0044264	P	cellular polysaccharide metabolic process	137	9153	254	23397	1.4e-06	0.0008	// CCG029177 // CCG025717 // CCG025716 // CCG013954 // CCG029274 // CCG013412 // CCG006666 // CCG016441 // CCG013411 // CCG021387 // CCG004057 // CCG022154 // CCG016391 // CCG016792 // CCG000550 // CCG009696 // CCG004058 // CCG004452 // CCG010767 // CCG029580 // CCG010951 // CCG021264 // CCG020194 // CCG020195 // CCG020196 // CCG019675 // CCG019674 // CCG007059 // CCG013512 // CCG027521 // CCG000…
GO:0007167	P	enzyme linked receptor protein signaling pathway	93	9153	162	23397	2.1e-06	0.0011	// CCG022417 // CCG022416 // CCG010249 // CCG009614 // CCG024788 // CCG018773 // CCG018772 // CCG007244 // CCG014174 // CCG009055 // CCG001500 // CCG010572 // CCG007966 // CCG003991 // CCG009987 // CCG010498 // CCG010499 // CCG005865 // CCG015748 // CCG019779 // CCG029372 // CCG011772 // CCG012308 // CCG007610 // CCG001654 // CCG001655 // CCG012443 // CCG004996 // CCG019666 // CCG022987 // CCG016…
GO:0007178	P	transmembrane receptor protein serine/threonine kinase signaling pathway	93	9153	162	23397	2.1e-06	0.0011	// CCG022417 // CCG022416 // CCG010249 // CCG009614 // CCG024788 // CCG018773 // CCG018772 // CCG007244 // CCG014174 // CCG009055 // CCG001500 // CCG010572 // CCG007966 // CCG003991 // CCG009987 // CCG010498 // CCG010499 // CCG005865 // CCG015748 // CCG019779 // CCG029372 // CCG011772 // CCG012308 // CCG007610 // CCG001654 // CCG001655 // CCG012443 // CCG004996 // CCG019666 // CCG022987 // CCG016…
GO:0009407	P	toxin catabolic process	29	9153	38	23397	3.6e-06	0.0017	// CCG013817 // CCG013816 // CCG013815 // CCG013813 // CCG013812 // CCG015480 // CCG015481 // CCG005641 // CCG008015 // CCG016371 // CCG011570 // CCG011571 // CCG022875 // CCG022877 // CCG022858 // CCG007318 // CCG013822 // CCG013823 // CCG013821 // CCG013824 // CCG015479 // CCG022752 // CCG026248 // CCG022876 // CCG012058 // CCG012056 // CCG027996 // CCG026251 // CCG026250
GO:0090487	P	secondary metabolite catabolic process	29	9153	38	23397	3.6e-06	0.0017	// CCG013817 // CCG013816 // CCG013815 // CCG013813 // CCG013812 // CCG015480 // CCG015481 // CCG005641 // CCG008015 // CCG016371 // CCG011570 // CCG011571 // CCG022875 // CCG022877 // CCG022858 // CCG007318 // CCG013822 // CCG013823 // CCG013821 // CCG013824 // CCG015479 // CCG022752 // CCG026248 // CCG022876 // CCG012058 // CCG012056 // CCG027996 // CCG026251 // CCG026250
GO:0034637	P	cellular carbohydrate biosynthetic process	103	9153	186	23397	5.8e-06	0.0027	// CCG013954 // CCG029274 // CCG021387 // CCG004057 // CCG000550 // CCG009696 // CCG007046 // CCG010767 // CCG029580 // CCG020194 // CCG020195 // CCG020196 // CCG019675 // CCG019674 // CCG007059 // CCG013512 // CCG027521 // CCG020298 // CCG016784 // CCG020294 // CCG017418 // CCG026727 // CCG011370 // CCG015901 // CCG006342 // CCG021360 // CCG014736 // CCG020206 // CCG020679 // CCG020678 // CCG019…
GO:0016051	P	carbohydrate biosynthetic process	131	9153	250	23397	1.6e-05	0.0073	// CCG013954 // CCG003114 // CCG029274 // CCG007062 // CCG027600 // CCG004057 // CCG000550 // CCG009696 // CCG007046 // CCG000994 // CCG010767 // CCG029580 // CCG004882 // CCG012476 // CCG007059 // CCG017912 // CCG020194 // CCG020195 // CCG020196 // CCG019675 // CCG019674 // CCG028808 // CCG028809 // CCG013512 // CCG027521 // CCG000241 // CCG016784 // CCG006342 // CCG017418 // CCG026727 // CCG011…
GO:0046916	P	cellular transition metal ion homeostasis	58	9153	96	23397	2.1e-05	0.0092	// CCG012766 // CCG027604 // CCG027606 // CCG029233 // CCG027603 // CCG025127 // CCG026615 // CCG025109 // CCG012768 // CCG025480 // CCG012830 // CCG009369 // CCG002992 // CCG013313 // CCG006740 // CCG029036 // CCG006271 // CCG020915 // CCG004240 // CCG023831 // CCG015520 // CCG022974 // CCG023390 // CCG029148 // CCG019418 // CCG026477 // CCG020405 // CCG024098 // CCG012208 // CCG014321 // CCG019…
GO:0007018	P	microtubule-based movement	51	9153	83	23397	3.4e-05	0.014	// CCG000755 // CCG002427 // CCG026522 // CCG023890 // CCG001961 // CCG027761 // CCG000869 // CCG020301 // CCG018269 // CCG023528 // CCG019847 // CCG006603 // CCG019826 // CCG001305 // CCG013015 // CCG017645 // CCG008073 // CCG001549 // CCG027206 // CCG023793 // CCG027014 // CCG007519 // CCG027866 // CCG013150 // CCG028291 // CCG029460 // CCG002507 // CCG001745 // CCG021822 // CCG015033 // CCG003…
GO:0009404	P	toxin metabolic process	29	9153	41	23397	4.2e-05	0.018	// CCG013817 // CCG013816 // CCG013815 // CCG013813 // CCG013812 // CCG015480 // CCG015481 // CCG005641 // CCG008015 // CCG016371 // CCG011570 // CCG011571 // CCG022875 // CCG022877 // CCG022858 // CCG007318 // CCG013822 // CCG013823 // CCG013821 // CCG013824 // CCG015479 // CCG022752 // CCG026248 // CCG022876 // CCG012058 // CCG012056 // CCG027996 // CCG026251 // CCG026250
GO:0030244	P	cellulose biosynthetic process	33	9153	49	23397	6.1e-05	0.024	// CCG013954 // CCG029132 // CCG021360 // CCG029274 // CCG007062 // CCG013409 // CCG016616 // CCG016959 // CCG022173 // CCG004057 // CCG025716 // CCG004097 // CCG004096 // CCG002816 // CCG010767 // CCG010740 // CCG012924 // CCG001918 // CCG001917 // CCG001916 // CCG025717 // CCG008205 // CCG013412 // CCG013411 // CCG027589 // CCG007059 // CCG007526 // CCG028622 // CCG023280 // CCG013189 // CCG015…
GO:0000186	P	activation of MAPKK activity	90	9153	166	23397	6.2e-05	0.024	// CCG010162 // CCG020347 // CCG010690 // CCG021468 // CCG011808 // CCG008335 // CCG014831 // CCG014832 // CCG029182 // CCG011804 // CCG002492 // CCG022797 // CCG005973 // CCG010498 // CCG010499 // CCG009622 // CCG022561 // CCG022560 // CCG019779 // CCG022569 // CCG022568 // CCG006710 // CCG015270 // CCG003351 // CCG011461 // CCG022800 // CCG026782 // CCG022572 // CCG016585 // CCG025966 // CCG028…
GO:0010411	P	xyloglucan metabolic process	35	9153	53	23397	6.8e-05	0.026	// CCG023899 // CCG025020 // CCG029138 // CCG016441 // CCG017963 // CCG022154 // CCG016391 // CCG004201 // CCG016792 // CCG027829 // CCG014649 // CCG004058 // CCG021847 // CCG013978 // CCG026804 // CCG022444 // CCG006329 // CCG006328 // CCG004108 // CCG026961 // CCG019675 // CCG019674 // CCG026490 // CCG023904 // CCG023902 // CCG012993 // CCG023900 // CCG002707 // CCG006342 // CCG017884 // CCG017…
GO:0045492	P	xylan biosynthetic process	19	9153	24	23397	7.6e-05	0.029	// CCG014126 // CCG006447 // CCG020294 // CCG018228 // CCG000241 // CCG022149 // CCG020298 // CCG009696 // CCG014736 // CCG029274 // CCG001552 // CCG000351 // CCG007588 // CCG016073 // CCG028866 // CCG008744 // CCG029580 // CCG026727 // CCG021387
GO:0044262	P	cellular carbohydrate metabolic process	191	9153	392	23397	8.1e-05	0.03	// CCG029177 // CCG025717 // CCG016792 // CCG025716 // CCG013954 // CCG029274 // CCG013412 // CCG006666 // CCG016441 // CCG013411 // CCG000322 // CCG004057 // CCG022154 // CCG016391 // CCG010791 // CCG000550 // CCG009696 // CCG004058 // CCG004452 // CCG010767 // CCG028033 // CCG029580 // CCG004882 // CCG010951 // CCG014768 // CCG021264 // CCG020194 // CCG020195 // CCG020196 // CCG019675 // CCG019…
GO:0005975	P	carbohydrate metabolic process	536	9153	1201	23397	8.6e-05	0.031	// CCG025717 // CCG016940 // CCG025716 // CCG000652 // CCG015335 // CCG004057 // CCG015337 // CCG008619 // CCG007505 // CCG010767 // CCG009742 // CCG001874 // CCG020047 // CCG017912 // CCG021264 // CCG006550 // CCG006659 // CCG022167 // CCG007059 // CCG013512 // CCG020298 // CCG016784 // CCG020294 // CCG020921 // CCG013891 // CCG020922 // CCG026422 // CCG025773 // CCG026936 // CCG008397 // CCG008…
GO:0045491	P	xylan metabolic process	24	9153	33	23397	9.5e-05	0.033	// CCG021387 // CCG029274 // CCG008744 // CCG018228 // CCG017311 // CCG014736 // CCG009696 // CCG015021 // CCG016073 // CCG029580 // CCG017384 // CCG000351 // CCG028866 // CCG020298 // CCG014126 // CCG006447 // CCG000241 // CCG020294 // CCG022149 // CCG001552 // CCG020921 // CCG020922 // CCG007588 // CCG026727
GO:0009833	P	plant-type primary cell wall biogenesis	17	9153	21	23397	0.00011	0.038	// CCG007062 // CCG013954 // CCG025716 // CCG021360 // CCG001917 // CCG001916 // CCG004097 // CCG004096 // CCG010754 // CCG013409 // CCG025717 // CCG010767 // CCG013412 // CCG013411 // CCG027589 // CCG015969 // CCG023280
GO:0044042	P	glucan metabolic process	115	9153	224	23397	0.00015	0.05	// CCG029177 // CCG025717 // CCG025716 // CCG013954 // CCG029274 // CCG013412 // CCG006666 // CCG016441 // CCG004057 // CCG022154 // CCG016391 // CCG016792 // CCG000550 // CCG027829 // CCG004058 // CCG010767 // CCG010951 // CCG021264 // CCG020194 // CCG020195 // CCG020196 // CCG019675 // CCG019674 // CCG007059 // CCG013512 // CCG006342 // CCG006951 // CCG017554 // CCG017555 // CCG017552 // CCG017…
GO:0010200	P	response to chitin	22	9153	30	23397	0.00015	0.05	// CCG025009 // CCG007308 // CCG010222 // CCG002301 // CCG004171 // CCG004300 // CCG025505 // CCG000383 // CCG000384 // CCG005245 // CCG017548 // CCG008832 // CCG029041 // CCG024768 // CCG007795 // CCG008991 // CCG010790 // CCG004828 // CCG007648 // CCG015908 // CCG015907 // CCG010775
GO:0006928	P	movement of cell or subcellular component	54	9153	93	23397	0.00017	0.055	// CCG000755 // CCG002427 // CCG026522 // CCG023890 // CCG001961 // CCG027761 // CCG000869 // CCG020301 // CCG018269 // CCG023528 // CCG019847 // CCG006603 // CCG019826 // CCG001305 // CCG013015 // CCG017645 // CCG008073 // CCG001549 // CCG027206 // CCG023793 // CCG027014 // CCG007519 // CCG027866 // CCG013150 // CCG028291 // CCG029460 // CCG002507 // CCG001745 // CCG021822 // CCG015033 // CCG003…
GO:0070592	P	cell wall polysaccharide biosynthetic process	23	9153	32	23397	0.00018	0.056	// CCG021387 // CCG009696 // CCG029274 // CCG008744 // CCG016959 // CCG018228 // CCG014736 // CCG003650 // CCG016073 // CCG022173 // CCG029580 // CCG000351 // CCG028866 // CCG020298 // CCG014126 // CCG006447 // CCG027521 // CCG000241 // CCG020294 // CCG022149 // CCG001552 // CCG007588 // CCG026727
GO:0043410	P	positive regulation of MAPK cascade	90	9153	170	23397	0.00019	0.057	// CCG010162 // CCG020347 // CCG010690 // CCG021468 // CCG011808 // CCG008335 // CCG014831 // CCG014832 // CCG029182 // CCG011804 // CCG002492 // CCG022797 // CCG005973 // CCG010498 // CCG010499 // CCG009622 // CCG022561 // CCG022560 // CCG019779 // CCG022569 // CCG022568 // CCG006710 // CCG015270 // CCG003351 // CCG011461 // CCG022800 // CCG026782 // CCG022572 // CCG016585 // CCG025966 // CCG028…
GO:0055076	P	transition metal ion homeostasis	63	9153	112	23397	0.00019	0.057	// CCG012766 // CCG027604 // CCG027606 // CCG029233 // CCG027603 // CCG027602 // CCG025127 // CCG026615 // CCG025109 // CCG012768 // CCG025480 // CCG012830 // CCG009369 // CCG002992 // CCG028897 // CCG013313 // CCG006740 // CCG029036 // CCG006271 // CCG020915 // CCG004240 // CCG023831 // CCG004023 // CCG022974 // CCG023390 // CCG029148 // CCG019418 // CCG026477 // CCG020405 // CCG024098 // CCG012…
GO:0006749	P	glutathione metabolic process	46	9153	77	23397	0.00021	0.06	// CCG013817 // CCG013816 // CCG013815 // CCG013813 // CCG013812 // CCG013810 // CCG020327 // CCG020326 // CCG015480 // CCG019045 // CCG005641 // CCG008015 // CCG020330 // CCG016371 // CCG022971 // CCG011570 // CCG011571 // CCG022875 // CCG022877 // CCG022876 // CCG003206 // CCG018038 // CCG002137 // CCG027672 // CCG007318 // CCG013822 // CCG013823 // CCG013821 // CCG013824 // CCG015479 // CCG022…
GO:0009250	P	glucan biosynthetic process	65	9153	117	23397	0.00024	0.069	// CCG013954 // CCG007526 // CCG010754 // CCG029132 // CCG021360 // CCG016501 // CCG029274 // CCG007062 // CCG020679 // CCG020678 // CCG020196 // CCG015103 // CCG013409 // CCG013412 // CCG016616 // CCG025891 // CCG016959 // CCG018332 // CCG022173 // CCG004057 // CCG016504 // CCG004201 // CCG000550 // CCG004097 // CCG004096 // CCG002816 // CCG016373 // CCG010767 // CCG010740 // CCG012924 // CCG001…
GO:0043405	P	regulation of MAP kinase activity	90	9153	171	23397	0.00025	0.07	// CCG010162 // CCG020347 // CCG010690 // CCG021468 // CCG011808 // CCG008335 // CCG014831 // CCG014832 // CCG029182 // CCG011804 // CCG002492 // CCG022797 // CCG005973 // CCG010498 // CCG010499 // CCG009622 // CCG022561 // CCG022560 // CCG019779 // CCG022569 // CCG022568 // CCG006710 // CCG015270 // CCG003351 // CCG011461 // CCG022800 // CCG026782 // CCG022572 // CCG016585 // CCG025966 // CCG028…
GO:0006468	P	protein phosphorylation	746	9153	1720	23397	0.00029	0.08	// CCG010162 // CCG010249 // CCG020347 // CCG006513 // CCG019272 // CCG015955 // CCG023938 // CCG020226 // CCG018773 // CCG017622 // CCG018772 // CCG011808 // CCG022731 // CCG004051 // CCG003320 // CCG014174 // CCG011804 // CCG022798 // CCG007492 // CCG007493 // CCG022793 // CCG007496 // CCG003991 // CCG007495 // CCG008811 // CCG029158 // CCG024425 // CCG003267 // CCG010015 // CCG008250 // CCG013…
GO:0006073	P	cellular glucan metabolic process	110	9153	216	23397	0.0003	0.082	// CCG029177 // CCG025717 // CCG025716 // CCG013954 // CCG029274 // CCG013412 // CCG006666 // CCG016441 // CCG004057 // CCG022154 // CCG016391 // CCG016792 // CCG000550 // CCG027829 // CCG004058 // CCG010767 // CCG010951 // CCG021264 // CCG020194 // CCG020195 // CCG020196 // CCG019675 // CCG019674 // CCG007059 // CCG013512 // CCG006342 // CCG006951 // CCG017554 // CCG017555 // CCG017552 // CCG017…
GO:0016310	P	phosphorylation	997	9153	2333	23397	0.00037	0.099	// CCG016409 // CCG010162 // CCG021211 // CCG010249 // CCG013585 // CCG020347 // CCG006513 // CCG010243 // CCG015955 // CCG023938 // CCG020226 // CCG018773 // CCG017622 // CCG007060 // CCG002876 // CCG018772 // CCG011808 // CCG022731 // CCG004051 // CCG003320 // CCG012319 // CCG014174 // CCG011804 // CCG022798 // CCG007492 // CCG007493 // CCG022793 // CCG007496 // CCG003991 // CCG007495 // CCG014…
GO:0044038	P	cell wall macromolecule biosynthetic process	24	9153	35	23397	0.00041	0.1	// CCG021387 // CCG003650 // CCG029274 // CCG008744 // CCG016959 // CCG018228 // CCG014736 // CCG009696 // CCG016073 // CCG022173 // CCG029580 // CCG000351 // CCG028866 // CCG020298 // CCG014126 // CCG006447 // CCG027521 // CCG000241 // CCG020294 // CCG022149 // CCG001552 // CCG007588 // CCG026727 // CCG024939
GO:0070589	P	cellular component macromolecule biosynthetic process	24	9153	35	23397	0.00041	0.1	// CCG021387 // CCG003650 // CCG029274 // CCG008744 // CCG016959 // CCG018228 // CCG014736 // CCG009696 // CCG016073 // CCG022173 // CCG029580 // CCG000351 // CCG028866 // CCG020298 // CCG014126 // CCG006447 // CCG027521 // CCG000241 // CCG020294 // CCG022149 // CCG001552 // CCG007588 // CCG026727 // CCG024939
GO:0015893	P	drug transport	50	9153	87	23397	0.00042	0.1	// CCG028344 // CCG026524 // CCG014881 // CCG008451 // CCG014882 // CCG028145 // CCG009733 // CCG001822 // CCG024778 // CCG009734 // CCG006505 // CCG008450 // CCG008889 // CCG023810 // CCG006605 // CCG024008 // CCG014880 // CCG001564 // CCG009914 // CCG016291 // CCG008290 // CCG008293 // CCG015144 // CCG008295 // CCG008294 // CCG015461 // CCG010599 // CCG028394 // CCG007593 // CCG009915 // CCG000…
GO:0006855	P	drug transmembrane transport	50	9153	87	23397	0.00042	0.1	// CCG028344 // CCG026524 // CCG014881 // CCG008451 // CCG014882 // CCG028145 // CCG009733 // CCG001822 // CCG024778 // CCG009734 // CCG006505 // CCG008450 // CCG008889 // CCG023810 // CCG006605 // CCG024008 // CCG014880 // CCG001564 // CCG009914 // CCG016291 // CCG008290 // CCG008293 // CCG015144 // CCG008295 // CCG008294 // CCG015461 // CCG010599 // CCG028394 // CCG007593 // CCG009915 // CCG000…
GO:0055065	P	metal ion homeostasis	77	9153	145	23397	0.00046	0.11	// CCG012766 // CCG027604 // CCG027606 // CCG029233 // CCG027603 // CCG027602 // CCG025127 // CCG026615 // CCG025109 // CCG012768 // CCG025480 // CCG012830 // CCG009369 // CCG002992 // CCG028897 // CCG013313 // CCG028870 // CCG028877 // CCG006740 // CCG028406 // CCG022974 // CCG028584 // CCG028583 // CCG029036 // CCG028581 // CCG006271 // CCG020915 // CCG004240 // CCG023831 // CCG003497 // CCG004…
GO:0051274	P	beta-glucan biosynthetic process	44	9153	75	23397	0.00049	0.12	// CCG013954 // CCG007526 // CCG029132 // CCG021360 // CCG029274 // CCG007062 // CCG020679 // CCG020678 // CCG013409 // CCG013412 // CCG016616 // CCG016959 // CCG020196 // CCG022173 // CCG004057 // CCG016504 // CCG016501 // CCG004097 // CCG004096 // CCG002816 // CCG016373 // CCG010767 // CCG010740 // CCG012924 // CCG001918 // CCG001917 // CCG001916 // CCG022818 // CCG020206 // CCG025717 // CCG008…
GO:0042493	P	response to drug	55	9153	98	23397	0.0005	0.12	// CCG028344 // CCG026524 // CCG014881 // CCG008451 // CCG014882 // CCG028145 // CCG011716 // CCG010448 // CCG009733 // CCG001822 // CCG024778 // CCG009734 // CCG006505 // CCG008450 // CCG008889 // CCG023810 // CCG006605 // CCG024008 // CCG014880 // CCG001564 // CCG009914 // CCG016291 // CCG008290 // CCG008293 // CCG015144 // CCG008295 // CCG008294 // CCG015461 // CCG010599 // CCG020651 // CCG028…
GO:0043408	P	regulation of MAPK cascade	95	9153	185	23397	0.00052	0.12	// CCG010162 // CCG020347 // CCG020647 // CCG010690 // CCG021468 // CCG011808 // CCG008335 // CCG014831 // CCG014832 // CCG029182 // CCG011804 // CCG002492 // CCG022797 // CCG005973 // CCG010498 // CCG010499 // CCG009622 // CCG022561 // CCG022560 // CCG019779 // CCG022569 // CCG022568 // CCG006710 // CCG015270 // CCG003351 // CCG011461 // CCG022800 // CCG026782 // CCG022572 // CCG016585 // CCG025…
GO:0009834	P	plant-type secondary cell wall biogenesis	30	9153	47	23397	0.00054	0.12	// CCG021387 // CCG000903 // CCG000904 // CCG024452 // CCG005163 // CCG002871 // CCG009696 // CCG007062 // CCG005245 // CCG027635 // CCG017763 // CCG029580 // CCG017764 // CCG001269 // CCG020278 // CCG008811 // CCG026603 // CCG006513 // CCG000351 // CCG028866 // CCG007059 // CCG020294 // CCG028622 // CCG020921 // CCG020922 // CCG003881 // CCG026727 // CCG015969 // CCG003884 // CCG015901
GO:0071900	P	regulation of protein serine/threonine kinase activity	99	9153	195	23397	0.00067	0.15	// CCG010162 // CCG020347 // CCG010690 // CCG021468 // CCG011808 // CCG008335 // CCG014831 // CCG014832 // CCG029182 // CCG011804 // CCG002492 // CCG022797 // CCG005973 // CCG023641 // CCG010498 // CCG010499 // CCG009334 // CCG009622 // CCG022561 // CCG022560 // CCG019779 // CCG022569 // CCG022568 // CCG006710 // CCG015270 // CCG003351 // CCG011461 // CCG022800 // CCG026782 // CCG022572 // CCG016…
GO:0009733	P	response to auxin	103	9153	204	23397	0.00068	0.15	// CCG001638 // CCG013815 // CCG013813 // CCG013812 // CCG004384 // CCG005948 // CCG027532 // CCG024826 // CCG010765 // CCG005978 // CCG008812 // CCG010095 // CCG011143 // CCG019601 // CCG012823 // CCG027933 // CCG024346 // CCG018565 // CCG007753 // CCG029470 // CCG024912 // CCG013214 // CCG016669 // CCG026440 // CCG026441 // CCG008942 // CCG009486 // CCG012282 // CCG016678 // CCG003877 // CCG011…
GO:0000165	P	MAPK cascade	102	9153	202	23397	0.00071	0.16	// CCG010162 // CCG020347 // CCG020647 // CCG010690 // CCG021468 // CCG029210 // CCG011808 // CCG008335 // CCG014831 // CCG014832 // CCG029182 // CCG011804 // CCG002492 // CCG022797 // CCG005973 // CCG010498 // CCG010499 // CCG009622 // CCG022561 // CCG022560 // CCG019779 // CCG022569 // CCG022568 // CCG006710 // CCG015270 // CCG003351 // CCG011461 // CCG022800 // CCG026782 // CCG022572 // CCG016…
GO:0019932	P	second-messenger-mediated signaling	13	9153	16	23397	0.00073	0.16	// CCG000718 // CCG018258 // CCG010510 // CCG015567 // CCG010502 // CCG010534 // CCG002431 // CCG010509 // CCG016495 // CCG025304 // CCG021168 // CCG026487 // CCG016497
GO:0032147	P	activation of protein kinase activity	102	9153	203	23397	0.00088	0.19	// CCG010162 // CCG020347 // CCG010690 // CCG021468 // CCG011808 // CCG008335 // CCG014831 // CCG014832 // CCG029182 // CCG011804 // CCG020425 // CCG002492 // CCG022797 // CCG002356 // CCG005973 // CCG010498 // CCG010499 // CCG009622 // CCG022561 // CCG022560 // CCG019779 // CCG022569 // CCG022568 // CCG006710 // CCG015270 // CCG003351 // CCG011461 // CCG022800 // CCG026782 // CCG022572 // CCG016…
GO:0044710	P	single-organism metabolic process	2197	9153	5299	23397	0.00089	0.19	// CCG028938 // CCG010245 // CCG018470 // CCG018471 // CCG018479 // CCG014777 // CCG004038 // CCG005411 // CCG000125 // CCG000124 // CCG014171 // CCG005419 // CCG014175 // CCG010644 // CCG010884 // CCG022169 // CCG022168 // CCG022160 // CCG022167 // CCG005733 // CCG022368 // CCG013514 // CCG013512 // CCG001232 // CCG001239 // CCG013978 // CCG010086 // CCG017986 // CCG023142 // CCG026392 // CCG016…
GO:0016998	P	cell wall macromolecule catabolic process	14	9153	18	23397	0.00099	0.2	// CCG013189 // CCG016815 // CCG004295 // CCG016491 // CCG024804 // CCG028622 // CCG007840 // CCG002011 // CCG009217 // CCG009215 // CCG009216 // CCG002014 // CCG002017 // CCG027278
GO:0009698	P	phenylpropanoid metabolic process	54	9153	98	23397	0.001	0.2	// CCG009757 // CCG000675 // CCG010482 // CCG026178 // CCG023634 // CCG023635 // CCG010481 // CCG017302 // CCG025277 // CCG009715 // CCG007320 // CCG009719 // CCG011597 // CCG010478 // CCG012235 // CCG010470 // CCG005419 // CCG006940 // CCG009716 // CCG020955 // CCG005229 // CCG005993 // CCG026285 // CCG026210 // CCG020278 // CCG018238 // CCG018237 // CCG009703 // CCG026288 // CCG011166 // CCG025…
GO:0009808	P	lignin metabolic process	40	9153	69	23397	0.0012	0.24	// CCG010481 // CCG010482 // CCG026178 // CCG017302 // CCG025277 // CCG000675 // CCG010478 // CCG010470 // CCG005419 // CCG006940 // CCG020955 // CCG026285 // CCG026210 // CCG020278 // CCG018238 // CCG018237 // CCG009703 // CCG026288 // CCG011166 // CCG004841 // CCG004842 // CCG016085 // CCG006513 // CCG007548 // CCG001313 // CCG001310 // CCG003682 // CCG002555 // CCG017304 // CCG014476 // CCG000…
GO:0001934	P	positive regulation of protein phosphorylation	107	9153	217	23397	0.0015	0.3	// CCG010162 // CCG020347 // CCG010690 // CCG021468 // CCG011808 // CCG008335 // CCG014831 // CCG014832 // CCG029182 // CCG011804 // CCG020425 // CCG002492 // CCG022797 // CCG002356 // CCG005973 // CCG023641 // CCG010498 // CCG010499 // CCG009622 // CCG022561 // CCG022560 // CCG019779 // CCG022569 // CCG022568 // CCG006710 // CCG015270 // CCG003351 // CCG011461 // CCG021832 // CCG022800 // CCG026…
GO:0006875	P	cellular metal ion homeostasis	60	9153	113	23397	0.0018	0.36	// CCG012766 // CCG027604 // CCG027606 // CCG029233 // CCG027603 // CCG027602 // CCG025127 // CCG026615 // CCG025109 // CCG012768 // CCG025480 // CCG012830 // CCG009369 // CCG002992 // CCG013313 // CCG006740 // CCG029036 // CCG006271 // CCG020915 // CCG004240 // CCG023831 // CCG015520 // CCG022974 // CCG023390 // CCG029148 // CCG019418 // CCG026477 // CCG020405 // CCG024098 // CCG012208 // CCG014…
GO:0045860	P	positive regulation of protein kinase activity	106	9153	216	23397	0.002	0.38	// CCG010162 // CCG020347 // CCG010690 // CCG021468 // CCG011808 // CCG008335 // CCG014831 // CCG014832 // CCG029182 // CCG011804 // CCG020425 // CCG002492 // CCG022797 // CCG002356 // CCG005973 // CCG023641 // CCG010498 // CCG010499 // CCG009622 // CCG022561 // CCG022560 // CCG019779 // CCG022569 // CCG022568 // CCG006710 // CCG015270 // CCG003351 // CCG011461 // CCG021832 // CCG022800 // CCG026…
GO:1902533	P	positive regulation of intracellular signal transduction	90	9153	180	23397	0.002	0.39	// CCG010162 // CCG020347 // CCG010690 // CCG021468 // CCG011808 // CCG008335 // CCG014831 // CCG014832 // CCG029182 // CCG011804 // CCG002492 // CCG022797 // CCG005973 // CCG010498 // CCG010499 // CCG009622 // CCG022561 // CCG022560 // CCG019779 // CCG022569 // CCG022568 // CCG006710 // CCG015270 // CCG003351 // CCG011461 // CCG022800 // CCG026782 // CCG022572 // CCG016585 // CCG025966 // CCG028…
GO:0010243	P	response to organonitrogen compound	33	9153	56	23397	0.0021	0.4	// CCG025009 // CCG007308 // CCG010222 // CCG002301 // CCG004171 // CCG004300 // CCG020651 // CCG024675 // CCG011722 // CCG025505 // CCG000383 // CCG018950 // CCG000384 // CCG005245 // CCG012377 // CCG017548 // CCG008832 // CCG029041 // CCG024768 // CCG007795 // CCG020647 // CCG008991 // CCG010790 // CCG004828 // CCG000370 // CCG011716 // CCG024912 // CCG007648 // CCG015908 // CCG015907 // CCG010…
GO:0009813	P	flavonoid biosynthetic process	43	9153	77	23397	0.0022	0.4	// CCG012130 // CCG019068 // CCG015146 // CCG019066 // CCG006513 // CCG023634 // CCG023635 // CCG023716 // CCG025275 // CCG026875 // CCG009345 // CCG027277 // CCG000218 // CCG012128 // CCG012129 // CCG011840 // CCG012125 // CCG012126 // CCG012127 // CCG020979 // CCG014856 // CCG009010 // CCG023409 // CCG024429 // CCG023407 // CCG011329 // CCG023571 // CCG023408 // CCG004841 // CCG004842 // CCG018…
GO:0045937	P	positive regulation of phosphate metabolic process	107	9153	219	23397	0.0022	0.4	// CCG010162 // CCG020347 // CCG010690 // CCG021468 // CCG011808 // CCG008335 // CCG014831 // CCG014832 // CCG029182 // CCG011804 // CCG020425 // CCG002492 // CCG022797 // CCG002356 // CCG005973 // CCG023641 // CCG010498 // CCG010499 // CCG009622 // CCG022561 // CCG022560 // CCG019779 // CCG022569 // CCG022568 // CCG006710 // CCG015270 // CCG003351 // CCG011461 // CCG021832 // CCG022800 // CCG026…
GO:0042327	P	positive regulation of phosphorylation	107	9153	219	23397	0.0022	0.4	// CCG010162 // CCG020347 // CCG010690 // CCG021468 // CCG011808 // CCG008335 // CCG014831 // CCG014832 // CCG029182 // CCG011804 // CCG020425 // CCG002492 // CCG022797 // CCG002356 // CCG005973 // CCG023641 // CCG010498 // CCG010499 // CCG009622 // CCG022561 // CCG022560 // CCG019779 // CCG022569 // CCG022568 // CCG006710 // CCG015270 // CCG003351 // CCG011461 // CCG021832 // CCG022800 // CCG026…
GO:0098771	P	inorganic ion homeostasis	100	9153	203	23397	0.0022	0.4	// CCG024184 // CCG003497 // CCG025127 // CCG026632 // CCG023733 // CCG028897 // CCG013313 // CCG029036 // CCG010808 // CCG023831 // CCG005228 // CCG005227 // CCG009112 // CCG008067 // CCG020045 // CCG001971 // CCG020404 // CCG006348 // CCG022009 // CCG028785 // CCG028283 // CCG002992 // CCG003599 // CCG008100 // CCG017414 // CCG012766 // CCG025109 // CCG012768 // CCG005128 // CCG012830 // CCG004…
GO:0010562	P	positive regulation of phosphorus metabolic process	107	9153	219	23397	0.0022	0.4	// CCG010162 // CCG020347 // CCG010690 // CCG021468 // CCG011808 // CCG008335 // CCG014831 // CCG014832 // CCG029182 // CCG011804 // CCG020425 // CCG002492 // CCG022797 // CCG002356 // CCG005973 // CCG023641 // CCG010498 // CCG010499 // CCG009622 // CCG022561 // CCG022560 // CCG019779 // CCG022569 // CCG022568 // CCG006710 // CCG015270 // CCG003351 // CCG011461 // CCG021832 // CCG022800 // CCG026…
GO:0003333	P	amino acid transmembrane transport	61	9153	116	23397	0.0023	0.4	// CCG002127 // CCG027109 // CCG026815 // CCG012792 // CCG014464 // CCG002128 // CCG019046 // CCG009522 // CCG001194 // CCG019849 // CCG007650 // CCG007651 // CCG006565 // CCG027698 // CCG016567 // CCG007728 // CCG007729 // CCG021654 // CCG009234 // CCG003069 // CCG009593 // CCG019072 // CCG024421 // CCG002117 // CCG009070 // CCG003064 // CCG010139 // CCG028178 // CCG028179 // CCG026602 // CCG009…
GO:0044550	P	secondary metabolite biosynthetic process	111	9153	229	23397	0.0026	0.45	// CCG009757 // CCG006039 // CCG023634 // CCG023635 // CCG005947 // CCG007320 // CCG015201 // CCG011603 // CCG005419 // CCG012061 // CCG020955 // CCG005229 // CCG012062 // CCG013096 // CCG013095 // CCG013094 // CCG029773 // CCG028444 // CCG015547 // CCG008814 // CCG028164 // CCG025597 // CCG023091 // CCG023092 // CCG023093 // CCG008893 // CCG002625 // CCG008662 // CCG024853 // CCG002742 // CCG004…
GO:0050801	P	ion homeostasis	103	9153	211	23397	0.0028	0.47	// CCG024184 // CCG003497 // CCG025127 // CCG026632 // CCG023733 // CCG028897 // CCG013313 // CCG029036 // CCG010808 // CCG023831 // CCG005228 // CCG005227 // CCG009112 // CCG008067 // CCG020045 // CCG001971 // CCG020404 // CCG006348 // CCG022009 // CCG028785 // CCG001336 // CCG002992 // CCG003599 // CCG008100 // CCG017414 // CCG012766 // CCG028283 // CCG025109 // CCG012768 // CCG005128 // CCG012…
GO:0033674	P	positive regulation of kinase activity	106	9153	218	23397	0.0028	0.48	// CCG010162 // CCG020347 // CCG010690 // CCG021468 // CCG011808 // CCG008335 // CCG014831 // CCG014832 // CCG029182 // CCG011804 // CCG020425 // CCG002492 // CCG022797 // CCG002356 // CCG005973 // CCG023641 // CCG010498 // CCG010499 // CCG009622 // CCG022561 // CCG022560 // CCG019779 // CCG022569 // CCG022568 // CCG006710 // CCG015270 // CCG003351 // CCG011461 // CCG021832 // CCG022800 // CCG026…
GO:0015689	P	molybdate ion transport	11	9153	14	23397	0.0032	0.53	// CCG001931 // CCG020455 // CCG013873 // CCG013369 // CCG013878 // CCG022635 // CCG022634 // CCG018288 // CCG027266 // CCG008983 // CCG027939
GO:0031401	P	positive regulation of protein modification process	126	9153	265	23397	0.0034	0.56	// CCG010162 // CCG020347 // CCG010690 // CCG021468 // CCG011808 // CCG008335 // CCG014831 // CCG014832 // CCG025442 // CCG029182 // CCG011804 // CCG020425 // CCG002492 // CCG022797 // CCG002356 // CCG005973 // CCG023641 // CCG010498 // CCG014367 // CCG009622 // CCG022561 // CCG022560 // CCG019779 // CCG022569 // CCG022568 // CCG006710 // CCG015270 // CCG003351 // CCG011461 // CCG021832 // CCG022…
GO:0008300	P	isoprenoid catabolic process	6	9153	6	23397	0.0036	0.57	// CCG022911 // CCG004333 // CCG023716 // CCG011539 // CCG012927 // CCG017478
GO:1905039	P	carboxylic acid transmembrane transport	62	9153	120	23397	0.0036	0.57	// CCG002127 // CCG027109 // CCG026815 // CCG012792 // CCG014464 // CCG002128 // CCG019046 // CCG009522 // CCG001194 // CCG019849 // CCG007650 // CCG007651 // CCG006544 // CCG006565 // CCG027698 // CCG016567 // CCG007728 // CCG007729 // CCG021654 // CCG009234 // CCG003069 // CCG009593 // CCG019072 // CCG024421 // CCG002117 // CCG009070 // CCG003064 // CCG010139 // CCG028178 // CCG028179 // CCG026…
GO:1903825	P	organic acid transmembrane transport	62	9153	120	23397	0.0036	0.57	// CCG002127 // CCG027109 // CCG026815 // CCG012792 // CCG014464 // CCG002128 // CCG019046 // CCG009522 // CCG001194 // CCG019849 // CCG007650 // CCG007651 // CCG006544 // CCG006565 // CCG027698 // CCG016567 // CCG007728 // CCG007729 // CCG021654 // CCG009234 // CCG003069 // CCG009593 // CCG019072 // CCG024421 // CCG002117 // CCG009070 // CCG003064 // CCG010139 // CCG028178 // CCG028179 // CCG026…
GO:0042221	P	response to chemical	601	9153	1405	23397	0.0036	0.57	// CCG027642 // CCG000717 // CCG020220 // CCG018479 // CCG000125 // CCG000124 // CCG006437 // CCG005419 // CCG014175 // CCG026105 // CCG010765 // CCG010883 // CCG003991 // CCG011825 // CCG028271 // CCG012377 // CCG010916 // CCG010095 // CCG001049 // CCG000922 // CCG012823 // CCG013292 // CCG021264 // CCG024346 // CCG002918 // CCG007753 // CCG029470 // CCG017716 // CCG001336 // CCG016669 // CCG029…
GO:0045859	P	regulation of protein kinase activity	117	9153	245	23397	0.0038	0.6	// CCG010162 // CCG020347 // CCG010690 // CCG009616 // CCG021468 // CCG011808 // CCG008335 // CCG014831 // CCG014832 // CCG029182 // CCG011804 // CCG020425 // CCG002492 // CCG022797 // CCG002356 // CCG005973 // CCG023641 // CCG024425 // CCG010498 // CCG010499 // CCG009334 // CCG009622 // CCG022561 // CCG022560 // CCG019779 // CCG022569 // CCG022568 // CCG006710 // CCG015270 // CCG003351 // CCG011…
GO:0008202	P	steroid metabolic process	73	9153	145	23397	0.0041	0.62	// CCG015343 // CCG024890 // CCG025129 // CCG005836 // CCG013545 // CCG008828 // CCG020248 // CCG006644 // CCG004620 // CCG009938 // CCG025310 // CCG016618 // CCG006643 // CCG019743 // CCG002669 // CCG027283 // CCG019744 // CCG000671 // CCG010800 // CCG015268 // CCG017606 // CCG010807 // CCG027059 // CCG025067 // CCG000928 // CCG007922 // CCG013544 // CCG006251 // CCG013546 // CCG002396 // CCG018…
GO:0042325	P	regulation of phosphorylation	125	9153	264	23397	0.0042	0.64	// CCG010162 // CCG020347 // CCG006513 // CCG010690 // CCG009616 // CCG021468 // CCG011808 // CCG008335 // CCG014831 // CCG014832 // CCG029182 // CCG011043 // CCG011804 // CCG020425 // CCG002492 // CCG022797 // CCG002356 // CCG005973 // CCG023641 // CCG024425 // CCG010498 // CCG010499 // CCG009334 // CCG009622 // CCG022561 // CCG022560 // CCG019779 // CCG002918 // CCG022569 // CCG022568 // CCG006…
GO:0001932	P	regulation of protein phosphorylation	124	9153	262	23397	0.0044	0.66	// CCG010162 // CCG020347 // CCG006513 // CCG010690 // CCG009616 // CCG021468 // CCG011808 // CCG008335 // CCG014831 // CCG014832 // CCG029182 // CCG011043 // CCG011804 // CCG020425 // CCG002492 // CCG022797 // CCG002356 // CCG005973 // CCG023641 // CCG024425 // CCG010498 // CCG010499 // CCG009334 // CCG009622 // CCG022561 // CCG022560 // CCG019779 // CCG022569 // CCG022568 // CCG006710 // CCG015…
GO:0043549	P	regulation of kinase activity	117	9153	246	23397	0.0045	0.67	// CCG010162 // CCG020347 // CCG010690 // CCG009616 // CCG021468 // CCG011808 // CCG008335 // CCG014831 // CCG014832 // CCG029182 // CCG011804 // CCG020425 // CCG002492 // CCG022797 // CCG002356 // CCG005973 // CCG023641 // CCG024425 // CCG010498 // CCG010499 // CCG009334 // CCG009622 // CCG022561 // CCG022560 // CCG019779 // CCG022569 // CCG022568 // CCG006710 // CCG015270 // CCG003351 // CCG011…
GO:0010215	P	cellulose microfibril organization	13	9153	18	23397	0.0046	0.67	// CCG016623 // CCG027008 // CCG027822 // CCG014980 // CCG020301 // CCG016624 // CCG018269 // CCG015551 // CCG015552 // CCG015553 // CCG016959 // CCG023280 // CCG022173
GO:0071668	P	plant-type cell wall assembly	13	9153	18	23397	0.0046	0.67	// CCG016623 // CCG027008 // CCG027822 // CCG014980 // CCG020301 // CCG016624 // CCG018269 // CCG015551 // CCG015552 // CCG015553 // CCG016959 // CCG023280 // CCG022173
GO:0070726	P	cell wall assembly	13	9153	18	23397	0.0046	0.67	// CCG016623 // CCG027008 // CCG027822 // CCG014980 // CCG020301 // CCG016624 // CCG018269 // CCG015551 // CCG015552 // CCG015553 // CCG016959 // CCG023280 // CCG022173
GO:0055080	P	cation homeostasis	95	9153	196	23397	0.005	0.71	// CCG003497 // CCG025127 // CCG026632 // CCG023733 // CCG028897 // CCG013313 // CCG029036 // CCG010808 // CCG023831 // CCG005228 // CCG005227 // CCG009112 // CCG008067 // CCG020045 // CCG001971 // CCG020404 // CCG006348 // CCG022009 // CCG028785 // CCG028283 // CCG002992 // CCG003599 // CCG017414 // CCG012766 // CCG025109 // CCG012768 // CCG005128 // CCG012830 // CCG004240 // CCG022974 // CCG020…
GO:0006873	P	cellular ion homeostasis	77	9153	155	23397	0.005	0.71	// CCG012766 // CCG027604 // CCG027606 // CCG029233 // CCG027603 // CCG027602 // CCG025127 // CCG006394 // CCG026615 // CCG025109 // CCG012768 // CCG005128 // CCG025480 // CCG023733 // CCG009369 // CCG002928 // CCG023474 // CCG013313 // CCG002925 // CCG006740 // CCG008100 // CCG028406 // CCG008592 // CCG029036 // CCG006271 // CCG020915 // CCG004240 // CCG023831 // CCG015520 // CCG022974 // CCG023…
GO:0000910	P	cytokinesis	31	9153	54	23397	0.005	0.71	// CCG015025 // CCG013954 // CCG026788 // CCG004096 // CCG022434 // CCG020730 // CCG027589 // CCG025481 // CCG015041 // CCG011499 // CCG013409 // CCG001829 // CCG011558 // CCG011729 // CCG004097 // CCG007062 // CCG006431 // CCG010767 // CCG021360 // CCG001917 // CCG001916 // CCG025717 // CCG025716 // CCG013412 // CCG013411 // CCG007526 // CCG023280 // CCG026408 // CCG028001 // CCG015969 // CCG010…
GO:0009812	P	flavonoid metabolic process	44	9153	82	23397	0.0054	0.75	// CCG012130 // CCG019068 // CCG015146 // CCG019066 // CCG006513 // CCG023634 // CCG023635 // CCG023716 // CCG025275 // CCG026875 // CCG009345 // CCG027277 // CCG023810 // CCG000218 // CCG012128 // CCG012129 // CCG011840 // CCG012125 // CCG012126 // CCG012127 // CCG020979 // CCG014856 // CCG009010 // CCG023409 // CCG024429 // CCG023407 // CCG011329 // CCG023571 // CCG023408 // CCG004841 // CCG004…
GO:0001906	P	cell killing	15	9153	22	23397	0.0055	0.75	// CCG007912 // CCG013802 // CCG013804 // CCG003483 // CCG006153 // CCG008754 // CCG014814 // CCG014816 // CCG015501 // CCG015497 // CCG006147 // CCG015498 // CCG016745 // CCG010582 // CCG010583
GO:0044364	P	disruption of cells of other organism	15	9153	22	23397	0.0055	0.75	// CCG007912 // CCG013802 // CCG013804 // CCG003483 // CCG006153 // CCG008754 // CCG014814 // CCG014816 // CCG015501 // CCG015497 // CCG006147 // CCG015498 // CCG016745 // CCG010582 // CCG010583
GO:0031640	P	killing of cells of other organism	15	9153	22	23397	0.0055	0.75	// CCG007912 // CCG013802 // CCG013804 // CCG003483 // CCG006153 // CCG008754 // CCG014814 // CCG014816 // CCG015501 // CCG015497 // CCG006147 // CCG015498 // CCG016745 // CCG010582 // CCG010583
GO:0009734	P	auxin-activated signaling pathway	48	9153	91	23397	0.0058	0.78	// CCG023998 // CCG007085 // CCG013815 // CCG013813 // CCG013812 // CCG016678 // CCG004384 // CCG011499 // CCG005536 // CCG005285 // CCG011825 // CCG002853 // CCG026349 // CCG026348 // CCG018307 // CCG003148 // CCG021843 // CCG029565 // CCG003892 // CCG000903 // CCG001269 // CCG008260 // CCG000904 // CCG015017 // CCG011143 // CCG026820 // CCG019601 // CCG018308 // CCG025303 // CCG005937 // CCG001…
GO:0051347	P	positive regulation of transferase activity	121	9153	257	23397	0.0059	0.79	// CCG010162 // CCG020347 // CCG015334 // CCG021468 // CCG011808 // CCG008335 // CCG014831 // CCG014832 // CCG025442 // CCG029182 // CCG011804 // CCG020425 // CCG002492 // CCG022797 // CCG002356 // CCG005973 // CCG023641 // CCG010498 // CCG014367 // CCG009622 // CCG022561 // CCG022560 // CCG019779 // CCG022569 // CCG022568 // CCG006710 // CCG015270 // CCG003351 // CCG011461 // CCG021832 // CCG022…
GO:0002239	P	response to oomycetes	17	9153	26	23397	0.0061	0.8	// CCG014291 // CCG014292 // CCG001905 // CCG014295 // CCG014289 // CCG001906 // CCG009892 // CCG012343 // CCG012344 // CCG012345 // CCG007685 // CCG014293 // CCG026273 // CCG012346 // CCG014087 // CCG009889 // CCG014088
GO:0009816	P	defense response to bacterium, incompatible interaction	10	9153	13	23397	0.0065	0.83	// CCG019398 // CCG019399 // CCG003926 // CCG009405 // CCG010379 // CCG019397 // CCG005581 // CCG004874 // CCG019400 // CCG019401
GO:0019722	P	calcium-mediated signaling	10	9153	13	23397	0.0065	0.83	// CCG000718 // CCG018258 // CCG010510 // CCG021168 // CCG010502 // CCG010509 // CCG016495 // CCG025304 // CCG026487 // CCG016497
GO:0071365	P	cellular response to auxin stimulus	51	9153	98	23397	0.0065	0.83	// CCG023998 // CCG007085 // CCG013815 // CCG013813 // CCG013812 // CCG016678 // CCG004384 // CCG011499 // CCG005536 // CCG017311 // CCG004991 // CCG005285 // CCG011825 // CCG002853 // CCG026349 // CCG026348 // CCG018307 // CCG003148 // CCG021843 // CCG029565 // CCG003892 // CCG000903 // CCG001269 // CCG008260 // CCG027532 // CCG000904 // CCG015017 // CCG011143 // CCG026820 // CCG019601 // CCG018…
GO:0007166	P	cell surface receptor signaling pathway	134	9153	288	23397	0.0066	0.84	// CCG027648 // CCG022417 // CCG022416 // CCG010249 // CCG026633 // CCG014271 // CCG009614 // CCG021468 // CCG018773 // CCG027655 // CCG018772 // CCG010801 // CCG010802 // CCG007244 // CCG014174 // CCG009055 // CCG001500 // CCG010572 // CCG007966 // CCG003991 // CCG027659 // CCG013598 // CCG027653 // CCG013595 // CCG027656 // CCG027657 // CCG010498 // CCG010499 // CCG005865 // CCG015748 // CCG019…
GO:0008037	P	cell recognition	63	9153	125	23397	0.0069	0.87	// CCG000945 // CCG022535 // CCG009891 // CCG021402 // CCG019061 // CCG019063 // CCG021404 // CCG021400 // CCG016093 // CCG014625 // CCG014624 // CCG014626 // CCG010907 // CCG014135 // CCG004147 // CCG004150 // CCG023839 // CCG014133 // CCG014640 // CCG001340 // CCG014154 // CCG001344 // CCG001345 // CCG010690 // CCG000817 // CCG000082 // CCG000083 // CCG026245 // CCG018979 // CCG004515 // CCG004…
GO:0048544	P	recognition of pollen	63	9153	125	23397	0.0069	0.87	// CCG000945 // CCG022535 // CCG009891 // CCG021402 // CCG019061 // CCG019063 // CCG021404 // CCG021400 // CCG016093 // CCG014625 // CCG014624 // CCG014626 // CCG010907 // CCG014135 // CCG004147 // CCG004150 // CCG023839 // CCG014133 // CCG014640 // CCG001340 // CCG014154 // CCG001344 // CCG001345 // CCG010690 // CCG000817 // CCG000082 // CCG000083 // CCG026245 // CCG018979 // CCG004515 // CCG004…
GO:0051338	P	regulation of transferase activity	135	9153	291	23397	0.0072	0.89	// CCG010162 // CCG020347 // CCG010690 // CCG009616 // CCG021468 // CCG011604 // CCG011808 // CCG008335 // CCG014831 // CCG014832 // CCG025442 // CCG029182 // CCG011804 // CCG020425 // CCG010697 // CCG029469 // CCG022797 // CCG002356 // CCG005973 // CCG023641 // CCG024425 // CCG010498 // CCG014367 // CCG009334 // CCG009622 // CCG022561 // CCG022560 // CCG019779 // CCG022569 // CCG022568 // CCG006…
GO:0090376	P	seed trichome differentiation	38	9153	70	23397	0.0073	0.89	// CCG029398 // CCG007768 // CCG003114 // CCG024452 // CCG003877 // CCG003957 // CCG000067 // CCG015554 // CCG012180 // CCG017583 // CCG019297 // CCG005002 // CCG007828 // CCG007062 // CCG027635 // CCG017728 // CCG020278 // CCG021168 // CCG026603 // CCG022203 // CCG022206 // CCG028938 // CCG022205 // CCG015525 // CCG000351 // CCG003902 // CCG000153 // CCG009448 // CCG007400 // CCG007059 // CCG001…
GO:0015698	P	inorganic anion transport	66	9153	132	23397	0.0073	0.89	// CCG020455 // CCG010029 // CCG004934 // CCG006394 // CCG022740 // CCG013878 // CCG004933 // CCG005128 // CCG023733 // CCG018288 // CCG024253 // CCG002928 // CCG002925 // CCG006524 // CCG008983 // CCG024501 // CCG024008 // CCG004366 // CCG008592 // CCG013873 // CCG002665 // CCG004245 // CCG023450 // CCG015912 // CCG027266 // CCG005047 // CCG005046 // CCG022691 // CCG022741 // CCG010030 // CCG022…
GO:0090151	P	establishment of protein localization to mitochondrial membrane	7	9153	8	23397	0.0074	0.89	// CCG006433 // CCG013316 // CCG022235 // CCG019658 // CCG008931 // CCG006968 // CCG023517
GO:0048878	P	chemical homeostasis	142	9153	308	23397	0.0078	0.94	// CCG024184 // CCG025129 // CCG025127 // CCG026632 // CCG019046 // CCG023733 // CCG028897 // CCG013313 // CCG007650 // CCG007651 // CCG029036 // CCG010808 // CCG023831 // CCG005228 // CCG005227 // CCG009112 // CCG008067 // CCG020045 // CCG001971 // CCG015473 // CCG020404 // CCG006348 // CCG022009 // CCG028785 // CCG001336 // CCG002992 // CCG003599 // CCG008100 // CCG017414 // CCG012766 // CCG028…
GO:0015849	P	organic acid transport	63	9153	126	23397	0.0086	1	// CCG002127 // CCG027109 // CCG026815 // CCG012792 // CCG024142 // CCG014464 // CCG002128 // CCG019046 // CCG009522 // CCG001194 // CCG019849 // CCG007650 // CCG007651 // CCG006544 // CCG006565 // CCG027698 // CCG016567 // CCG007728 // CCG007729 // CCG021654 // CCG009234 // CCG003069 // CCG009593 // CCG019072 // CCG024421 // CCG002117 // CCG009070 // CCG003064 // CCG010139 // CCG028178 // CCG028…
GO:0009768	P	photosynthesis, light harvesting in photosystem I	12	9153	17	23397	0.0087	1	// CCG006082 // CCG022028 // CCG022029 // CCG006442 // CCG022027 // CCG001076 // CCG029303 // CCG025834 // CCG020036 // CCG028864 // CCG011362 // CCG005916
GO:0080144	P	amino acid homeostasis	5	9153	5	23397	0.0092	1	// CCG019046 // CCG007650 // CCG014202 // CCG026815 // CCG007651
GO:0016115	P	terpenoid catabolic process	5	9153	5	23397	0.0092	1	// CCG011539 // CCG023716 // CCG022911 // CCG017478 // CCG012927
GO:0032973	P	amino acid export	5	9153	5	23397	0.0092	1	// CCG019046 // CCG007650 // CCG014202 // CCG026815 // CCG007651
GO:0030001	P	metal ion transport	179	9153	397	23397	0.0094	1	// CCG022414 // CCG025127 // CCG026914 // CCG026632 // CCG024434 // CCG024433 // CCG009345 // CCG007200 // CCG009619 // CCG024438 // CCG012311 // CCG029036 // CCG023832 // CCG010808 // CCG007043 // CCG023831 // CCG029676 // CCG012253 // CCG010078 // CCG010079 // CCG012254 // CCG010075 // CCG010076 // CCG011198 // CCG001644 // CCG012208 // CCG007196 // CCG004214 // CCG007199 // CCG020045 // CCG001…
GO:0010026	P	trichome differentiation	53	9153	104	23397	0.0095	1	// CCG029398 // CCG021380 // CCG029034 // CCG007768 // CCG003114 // CCG024452 // CCG015525 // CCG003877 // CCG003957 // CCG000067 // CCG015554 // CCG003902 // CCG012180 // CCG011604 // CCG017583 // CCG024827 // CCG019297 // CCG005002 // CCG007828 // CCG007062 // CCG027933 // CCG010333 // CCG012459 // CCG027635 // CCG017728 // CCG021379 // CCG020278 // CCG021168 // CCG026603 // CCG020350 // CCG022…
GO:0009739	P	response to gibberellin	31	9153	56	23397	0.01	1	// CCG028264 // CCG003114 // CCG003877 // CCG015510 // CCG020992 // CCG023855 // CCG016670 // CCG004171 // CCG016441 // CCG016614 // CCG028734 // CCG022074 // CCG016391 // CCG016778 // CCG000551 // CCG006912 // CCG011327 // CCG025015 // CCG027933 // CCG018302 // CCG005179 // CCG000153 // CCG001049 // CCG001895 // CCG015567 // CCG016669 // CCG026446 // CCG002368 // CCG003881 // CCG007768 // CCG003…
GO:0030003	P	cellular cation homeostasis	71	9153	146	23397	0.012	1	// CCG012766 // CCG027604 // CCG027606 // CCG029233 // CCG027603 // CCG027602 // CCG025127 // CCG006394 // CCG026615 // CCG025109 // CCG012768 // CCG005128 // CCG025480 // CCG023733 // CCG009369 // CCG002928 // CCG013313 // CCG002925 // CCG006740 // CCG028406 // CCG029036 // CCG006271 // CCG020915 // CCG004240 // CCG023831 // CCG015520 // CCG022974 // CCG023390 // CCG029148 // CCG019418 // CCG003…
GO:0009414	P	response to water deprivation	64	9153	130	23397	0.012	1	// CCG014885 // CCG001843 // CCG018950 // CCG008827 // CCG019604 // CCG000926 // CCG025256 // CCG005624 // CCG000717 // CCG022193 // CCG029046 // CCG007347 // CCG008091 // CCG018266 // CCG027382 // CCG028271 // CCG016441 // CCG001196 // CCG028734 // CCG013208 // CCG008592 // CCG016391 // CCG006437 // CCG015261 // CCG014488 // CCG012103 // CCG029617 // CCG029448 // CCG010883 // CCG011536 // CCG029…
GO:0009415	P	response to water	65	9153	132	23397	0.012	1	// CCG014885 // CCG001843 // CCG018950 // CCG008827 // CCG019604 // CCG000926 // CCG025256 // CCG005624 // CCG000717 // CCG022193 // CCG029046 // CCG007347 // CCG008091 // CCG018266 // CCG027382 // CCG028271 // CCG016441 // CCG001196 // CCG028734 // CCG013208 // CCG008592 // CCG016391 // CCG006437 // CCG015261 // CCG014488 // CCG012103 // CCG029617 // CCG029448 // CCG010883 // CCG011536 // CCG029…
GO:0080167	P	response to karrikin	26	9153	46	23397	0.013	1	// CCG013810 // CCG008470 // CCG009345 // CCG008485 // CCG018587 // CCG008150 // CCG020979 // CCG022971 // CCG012377 // CCG029635 // CCG028132 // CCG011342 // CCG025954 // CCG021692 // CCG024170 // CCG028494 // CCG012987 // CCG000370 // CCG013362 // CCG009964 // CCG002570 // CCG010632 // CCG010633 // CCG010631 // CCG010634 // CCG012383
GO:0023014	P	signal transduction by protein phosphorylation	117	9153	253	23397	0.013	1	// CCG010162 // CCG020347 // CCG006513 // CCG010690 // CCG021468 // CCG029210 // CCG011808 // CCG008335 // CCG014831 // CCG014832 // CCG029182 // CCG011804 // CCG002492 // CCG022797 // CCG002356 // CCG005973 // CCG010498 // CCG010499 // CCG009622 // CCG022561 // CCG022560 // CCG019779 // CCG022569 // CCG022568 // CCG025457 // CCG006710 // CCG015270 // CCG003351 // CCG011461 // CCG022800 // CCG027…
GO:0046274	P	lignin catabolic process	24	9153	42	23397	0.014	1	// CCG010481 // CCG010482 // CCG026178 // CCG000675 // CCG010478 // CCG010470 // CCG010471 // CCG006940 // CCG026285 // CCG018238 // CCG018237 // CCG009703 // CCG026288 // CCG014476 // CCG016085 // CCG007548 // CCG001313 // CCG001310 // CCG002555 // CCG026210 // CCG002538 // CCG002536 // CCG002537 // CCG017514
GO:0006880	P	intracellular sequestering of iron ion	10	9153	14	23397	0.015	1	// CCG004214 // CCG025432 // CCG025434 // CCG029233 // CCG020915 // CCG025109 // CCG025127 // CCG004022 // CCG004023 // CCG004021
GO:0097577	P	sequestering of iron ion	10	9153	14	23397	0.015	1	// CCG004214 // CCG025432 // CCG025434 // CCG029233 // CCG020915 // CCG025109 // CCG025127 // CCG004022 // CCG004023 // CCG004021
GO:0022412	P	cellular process involved in reproduction in multicellular organism	39	9153	75	23397	0.016	1	// CCG029398 // CCG024592 // CCG007768 // CCG003114 // CCG024452 // CCG003877 // CCG003957 // CCG000067 // CCG015554 // CCG012180 // CCG017583 // CCG019297 // CCG005002 // CCG007828 // CCG007062 // CCG027635 // CCG017728 // CCG020278 // CCG021168 // CCG026603 // CCG022203 // CCG022206 // CCG028938 // CCG022205 // CCG015525 // CCG000351 // CCG003902 // CCG000153 // CCG009448 // CCG007400 // CCG007…
GO:0030243	P	cellulose metabolic process	44	9153	86	23397	0.016	1	// CCG000828 // CCG025748 // CCG000285 // CCG021360 // CCG029177 // CCG029274 // CCG007062 // CCG016616 // CCG013409 // CCG015758 // CCG015759 // CCG006666 // CCG016959 // CCG022173 // CCG004057 // CCG025716 // CCG029132 // CCG004097 // CCG004096 // CCG002816 // CCG010767 // CCG010740 // CCG012924 // CCG012453 // CCG001918 // CCG001917 // CCG001916 // CCG025717 // CCG008205 // CCG013412 // CCG013…
GO:0009699	P	phenylpropanoid biosynthetic process	28	9153	51	23397	0.016	1	// CCG009757 // CCG023634 // CCG023635 // CCG009716 // CCG009715 // CCG007320 // CCG009719 // CCG011597 // CCG012235 // CCG005419 // CCG020955 // CCG005229 // CCG005993 // CCG020278 // CCG011166 // CCG025597 // CCG004841 // CCG004842 // CCG006513 // CCG003823 // CCG005947 // CCG017304 // CCG017302 // CCG000886 // CCG004509 // CCG004508 // CCG015966 // CCG004746
GO:0055085	P	transmembrane transport	682	9153	1630	23397	0.016	1	// CCG024993 // CCG018326 // CCG000650 // CCG016711 // CCG016710 // CCG007199 // CCG027905 // CCG004245 // CCG012311 // CCG005413 // CCG010093 // CCG006433 // CCG028052 // CCG010764 // CCG005228 // CCG005227 // CCG005220 // CCG028178 // CCG028179 // CCG029481 // CCG004412 // CCG029482 // CCG001877 // CCG009427 // CCG009749 // CCG002914 // CCG012823 // CCG015074 // CCG020043 // CCG014613 // CCG024…
GO:0043473	P	pigmentation	11	9153	16	23397	0.016	1	// CCG012128 // CCG012129 // CCG029514 // CCG012124 // CCG012125 // CCG012126 // CCG012137 // CCG012123 // CCG027872 // CCG005370 // CCG012134
GO:0044712	P	single-organism catabolic process	211	9153	479	23397	0.017	1	// CCG009757 // CCG012706 // CCG008825 // CCG013817 // CCG013584 // CCG013815 // CCG013813 // CCG013812 // CCG013583 // CCG018470 // CCG005947 // CCG028893 // CCG028892 // CCG028894 // CCG028897 // CCG016155 // CCG010481 // CCG023931 // CCG013267 // CCG022769 // CCG003542 // CCG010478 // CCG001349 // CCG004617 // CCG010470 // CCG010471 // CCG010379 // CCG006940 // CCG010644 // CCG011570 // CCG013…
GO:0009827	P	plant-type cell wall modification	6	9153	7	23397	0.017	1	// CCG012119 // CCG017963 // CCG029274 // CCG016959 // CCG012118 // CCG022173
GO:0016101	P	diterpenoid metabolic process	14	9153	22	23397	0.017	1	// CCG022911 // CCG007206 // CCG023463 // CCG000551 // CCG003488 // CCG023716 // CCG026446 // CCG011539 // CCG015510 // CCG002368 // CCG023466 // CCG018302 // CCG023465 // CCG017478
GO:0006694	P	steroid biosynthetic process	58	9153	118	23397	0.017	1	// CCG015343 // CCG024890 // CCG025129 // CCG005836 // CCG013545 // CCG008828 // CCG025315 // CCG015473 // CCG025310 // CCG016618 // CCG006643 // CCG019743 // CCG027283 // CCG009360 // CCG010800 // CCG015268 // CCG010807 // CCG025067 // CCG000928 // CCG007922 // CCG013544 // CCG006251 // CCG013546 // CCG018973 // CCG009297 // CCG008043 // CCG010245 // CCG003678 // CCG029583 // CCG023208 // CCG000…
GO:0002229	P	defense response to oomycetes	13	9153	20	23397	0.017	1	// CCG014291 // CCG014292 // CCG014293 // CCG014295 // CCG014289 // CCG001906 // CCG009892 // CCG001905 // CCG007685 // CCG026273 // CCG014087 // CCG009889 // CCG014088
GO:0032504	P	multicellular organism reproduction	54	9153	109	23397	0.018	1	// CCG024473 // CCG029398 // CCG003881 // CCG024592 // CCG013938 // CCG007768 // CCG003114 // CCG008744 // CCG003877 // CCG003957 // CCG020992 // CCG023855 // CCG000067 // CCG000960 // CCG015554 // CCG003902 // CCG012180 // CCG023810 // CCG001349 // CCG017583 // CCG019297 // CCG005002 // CCG007828 // CCG007062 // CCG020890 // CCG017728 // CCG020278 // CCG021168 // CCG026603 // CCG020272 // CCG022…
GO:0030154	P	cell differentiation	194	9153	439	23397	0.018	1	// CCG020651 // CCG001488 // CCG005939 // CCG025866 // CCG003114 // CCG007062 // CCG012589 // CCG014771 // CCG003853 // CCG011604 // CCG003916 // CCG024827 // CCG019297 // CCG019293 // CCG007963 // CCG012793 // CCG027635 // CCG004693 // CCG021824 // CCG004694 // CCG004697 // CCG004515 // CCG021379 // CCG009031 // CCG027151 // CCG002353 // CCG020350 // CCG013290 // CCG028607 // CCG027933 // CCG025…
GO:0009875	P	pollen-pistil interaction	63	9153	130	23397	0.019	1	// CCG000945 // CCG022535 // CCG009891 // CCG021402 // CCG019061 // CCG019063 // CCG021404 // CCG021400 // CCG016093 // CCG014625 // CCG014624 // CCG014626 // CCG010907 // CCG014135 // CCG004147 // CCG004150 // CCG023839 // CCG014133 // CCG014640 // CCG001340 // CCG014154 // CCG001344 // CCG001345 // CCG010690 // CCG000817 // CCG000082 // CCG000083 // CCG026245 // CCG018979 // CCG004515 // CCG004…
GO:0051273	P	beta-glucan metabolic process	55	9153	112	23397	0.02	1	// CCG000828 // CCG007526 // CCG025748 // CCG000285 // CCG021360 // CCG029177 // CCG029274 // CCG007062 // CCG020679 // CCG020678 // CCG013409 // CCG015758 // CCG015759 // CCG006666 // CCG016959 // CCG020196 // CCG022173 // CCG004057 // CCG016504 // CCG016501 // CCG029132 // CCG004097 // CCG004096 // CCG002816 // CCG016373 // CCG010767 // CCG010740 // CCG013412 // CCG012924 // CCG012453 // CCG001…
GO:0046271	P	phenylpropanoid catabolic process	24	9153	43	23397	0.02	1	// CCG010481 // CCG010482 // CCG026178 // CCG000675 // CCG010478 // CCG010470 // CCG010471 // CCG006940 // CCG026285 // CCG018238 // CCG018237 // CCG009703 // CCG026288 // CCG014476 // CCG016085 // CCG007548 // CCG001313 // CCG001310 // CCG002555 // CCG026210 // CCG002538 // CCG002536 // CCG002537 // CCG017514
GO:0009611	P	response to wounding	35	9153	67	23397	0.02	1	// CCG027448 // CCG009654 // CCG020248 // CCG009938 // CCG004171 // CCG027294 // CCG006522 // CCG029549 // CCG027450 // CCG027451 // CCG028838 // CCG018950 // CCG005245 // CCG003305 // CCG011597 // CCG000594 // CCG001588 // CCG024912 // CCG005411 // CCG026384 // CCG008227 // CCG009217 // CCG024133 // CCG004668 // CCG027284 // CCG004828 // CCG027447 // CCG009942 // CCG017716 // CCG005659 // CCG013…
GO:1902584	P	positive regulation of response to water deprivation	7	9153	9	23397	0.022	1	// CCG024088 // CCG006437 // CCG015261 // CCG000717 // CCG007347 // CCG008091 // CCG007448
GO:0010417	P	glucuronoxylan biosynthetic process	7	9153	9	23397	0.022	1	// CCG020294 // CCG008744 // CCG007588 // CCG000351 // CCG026727 // CCG001552 // CCG029580
GO:0010413	P	glucuronoxylan metabolic process	7	9153	9	23397	0.022	1	// CCG020294 // CCG008744 // CCG007588 // CCG000351 // CCG026727 // CCG001552 // CCG029580
GO:0006334	P	nucleosome assembly	22	9153	39	23397	0.022	1	// CCG011330 // CCG021380 // CCG019604 // CCG025256 // CCG015669 // CCG015676 // CCG029181 // CCG005304 // CCG012103 // CCG021379 // CCG012459 // CCG010059 // CCG005172 // CCG017675 // CCG025301 // CCG024281 // CCG025574 // CCG007665 // CCG007669 // CCG000983 // CCG003192 // CCG010060
GO:0009967	P	positive regulation of signal transduction	93	9153	201	23397	0.024	1	// CCG010162 // CCG020347 // CCG003114 // CCG010690 // CCG021468 // CCG011808 // CCG008335 // CCG014831 // CCG014832 // CCG029182 // CCG011804 // CCG002492 // CCG022797 // CCG005973 // CCG010498 // CCG010499 // CCG009622 // CCG022561 // CCG022560 // CCG019779 // CCG022569 // CCG022568 // CCG006710 // CCG015270 // CCG003351 // CCG011461 // CCG022800 // CCG026782 // CCG022572 // CCG016585 // CCG025…
GO:0023056	P	positive regulation of signaling	93	9153	201	23397	0.024	1	// CCG010162 // CCG020347 // CCG003114 // CCG010690 // CCG021468 // CCG011808 // CCG008335 // CCG014831 // CCG014832 // CCG029182 // CCG011804 // CCG002492 // CCG022797 // CCG005973 // CCG010498 // CCG010499 // CCG009622 // CCG022561 // CCG022560 // CCG019779 // CCG022569 // CCG022568 // CCG006710 // CCG015270 // CCG003351 // CCG011461 // CCG022800 // CCG026782 // CCG022572 // CCG016585 // CCG025…
GO:0010089	P	xylem development	8	9153	11	23397	0.025	1	// CCG017311 // CCG023661 // CCG014700 // CCG026238 // CCG005245 // CCG028903 // CCG020955 // CCG021445
GO:1903338	P	regulation of cell wall organization or biogenesis	8	9153	11	23397	0.025	1	// CCG006513 // CCG005245 // CCG028511 // CCG005163 // CCG019847 // CCG002871 // CCG016959 // CCG022173
GO:0019217	P	regulation of fatty acid metabolic process	8	9153	11	23397	0.025	1	// CCG001903 // CCG016495 // CCG009971 // CCG016497 // CCG001830 // CCG001831 // CCG014236 // CCG002918
GO:0042304	P	regulation of fatty acid biosynthetic process	8	9153	11	23397	0.025	1	// CCG001903 // CCG016495 // CCG009971 // CCG016497 // CCG001830 // CCG001831 // CCG014236 // CCG002918
GO:0044092	P	negative regulation of molecular function	67	9153	141	23397	0.026	1	// CCG022404 // CCG027448 // CCG026394 // CCG015406 // CCG029179 // CCG029178 // CCG005341 // CCG019828 // CCG019829 // CCG009184 // CCG021378 // CCG003957 // CCG015488 // CCG015489 // CCG021682 // CCG000006 // CCG021680 // CCG011604 // CCG027824 // CCG025087 // CCG024409 // CCG027450 // CCG000513 // CCG014406 // CCG008880 // CCG003401 // CCG026203 // CCG012089 // CCG024198 // CCG019833 // CCG017…
GO:0006820	P	anion transport	112	9153	247	23397	0.028	1	// CCG024183 // CCG015289 // CCG023733 // CCG007650 // CCG007651 // CCG006949 // CCG006544 // CCG012068 // CCG020443 // CCG009234 // CCG019070 // CCG020044 // CCG013292 // CCG020043 // CCG024501 // CCG027939 // CCG008141 // CCG007295 // CCG007296 // CCG008142 // CCG022361 // CCG006340 // CCG001336 // CCG013369 // CCG001535 // CCG027034 // CCG028780 // CCG013873 // CCG020073 // CCG022741 // CCG022…
GO:0015706	P	nitrate transport	10	9153	15	23397	0.029	1	// CCG000507 // CCG003249 // CCG000508 // CCG024253 // CCG016631 // CCG006513 // CCG006206 // CCG029157 // CCG012068 // CCG016184
GO:0009685	P	gibberellin metabolic process	10	9153	15	23397	0.029	1	// CCG022911 // CCG007206 // CCG000551 // CCG023716 // CCG026446 // CCG011539 // CCG015510 // CCG018302 // CCG002368 // CCG017478
GO:0009969	P	xyloglucan biosynthetic process	11	9153	17	23397	0.029	1	// CCG004201 // CCG019675 // CCG006342 // CCG022444 // CCG006329 // CCG006328 // CCG013978 // CCG004108 // CCG011370 // CCG019674 // CCG026490
GO:0007017	P	microtubule-based process	105	9153	231	23397	0.03	1	// CCG026522 // CCG015041 // CCG023528 // CCG013150 // CCG019218 // CCG006545 // CCG016565 // CCG028241 // CCG002427 // CCG026202 // CCG014839 // CCG006431 // CCG016398 // CCG011577 // CCG028291 // CCG029460 // CCG002507 // CCG001745 // CCG004960 // CCG018588 // CCG021822 // CCG004127 // CCG018561 // CCG011582 // CCG025481 // CCG024629 // CCG009902 // CCG015376 // CCG001335 // CCG013086 // CCG016…
GO:0006811	P	ion transport	407	9153	965	23397	0.031	1	// CCG027648 // CCG012311 // CCG028197 // CCG025684 // CCG005228 // CCG005227 // CCG009427 // CCG020044 // CCG013292 // CCG020043 // CCG001971 // CCG024349 // CCG022165 // CCG022368 // CCG022361 // CCG014997 // CCG001336 // CCG017712 // CCG010082 // CCG021666 // CCG012766 // CCG029253 // CCG029254 // CCG012768 // CCG005128 // CCG008885 // CCG011490 // CCG026737 // CCG028376 // CCG003064 // CCG011…
GO:0010647	P	positive regulation of cell communication	93	9153	203	23397	0.031	1	// CCG010162 // CCG020347 // CCG003114 // CCG010690 // CCG021468 // CCG011808 // CCG008335 // CCG014831 // CCG014832 // CCG029182 // CCG011804 // CCG002492 // CCG022797 // CCG005973 // CCG010498 // CCG010499 // CCG009622 // CCG022561 // CCG022560 // CCG019779 // CCG022569 // CCG022568 // CCG006710 // CCG015270 // CCG003351 // CCG011461 // CCG022800 // CCG026782 // CCG022572 // CCG016585 // CCG025…
GO:0072348	P	sulfur compound transport	21	9153	38	23397	0.032	1	// CCG027670 // CCG009640 // CCG004366 // CCG004934 // CCG006403 // CCG003001 // CCG005539 // CCG004245 // CCG019873 // CCG006402 // CCG020044 // CCG019713 // CCG020043 // CCG013172 // CCG024142 // CCG005047 // CCG005046 // CCG004933 // CCG029206 // CCG012596 // CCG007857
GO:0009719	P	response to endogenous stimulus	285	9153	667	23397	0.033	1	// CCG005814 // CCG024805 // CCG008827 // CCG003119 // CCG008825 // CCG001638 // CCG000926 // CCG013815 // CCG003114 // CCG013813 // CCG013812 // CCG010790 // CCG002199 // CCG020220 // CCG004384 // CCG023089 // CCG005624 // CCG004224 // CCG016441 // CCG005948 // CCG020257 // CCG006701 // CCG027532 // CCG024826 // CCG005178 // CCG016391 // CCG000551 // CCG019601 // CCG004300 // CCG002301 // CCG010…
GO:0090378	P	seed trichome elongation	25	9153	47	23397	0.035	1	// CCG029398 // CCG003114 // CCG003877 // CCG007768 // CCG000067 // CCG012180 // CCG017583 // CCG019297 // CCG005002 // CCG007828 // CCG017728 // CCG021168 // CCG022203 // CCG022206 // CCG022205 // CCG015525 // CCG003902 // CCG000153 // CCG009448 // CCG007400 // CCG010526 // CCG003881 // CCG003217 // CCG019428 // CCG003884
GO:0006559	P	L-phenylalanine catabolic process	5	9153	6	23397	0.037	1	// CCG025597 // CCG005947 // CCG026636 // CCG009757 // CCG012235
GO:0060236	P	regulation of mitotic spindle organization	5	9153	6	23397	0.037	1	// CCG006594 // CCG021259 // CCG005853 // CCG006922 // CCG022438
GO:0006355	P	regulation of transcription, DNA-templated	716	9153	1734	23397	0.039	1	// CCG010166 // CCG024994 // CCG020343 // CCG000659 // CCG002871 // CCG002874 // CCG029506 // CCG012310 // CCG003324 // CCG003441 // CCG027638 // CCG011363 // CCG003996 // CCG027637 // CCG011367 // CCG024908 // CCG006025 // CCG023961 // CCG009425 // CCG004801 // CCG013290 // CCG012824 // CCG021266 // CCG012227 // CCG002918 // CCG011946 // CCG023809 // CCG027831 // CCG020295 // CCG026238 // CCG016…
GO:0006833	P	water transport	17	9153	30	23397	0.039	1	// CCG016641 // CCG024664 // CCG028197 // CCG025684 // CCG009427 // CCG007828 // CCG014488 // CCG016734 // CCG008651 // CCG012408 // CCG006749 // CCG001260 // CCG024349 // CCG026737 // CCG021666 // CCG016098 // CCG013292
GO:0042044	P	fluid transport	17	9153	30	23397	0.039	1	// CCG016641 // CCG024664 // CCG028197 // CCG025684 // CCG009427 // CCG007828 // CCG014488 // CCG016734 // CCG008651 // CCG012408 // CCG006749 // CCG001260 // CCG024349 // CCG026737 // CCG021666 // CCG016098 // CCG013292
GO:0000281	P	mitotic cytokinesis	23	9153	43	23397	0.04	1	// CCG013954 // CCG021360 // CCG004096 // CCG011499 // CCG013409 // CCG001829 // CCG011729 // CCG004097 // CCG007062 // CCG010767 // CCG001917 // CCG001916 // CCG025717 // CCG025716 // CCG013412 // CCG013411 // CCG027589 // CCG007526 // CCG023280 // CCG026408 // CCG028001 // CCG015969 // CCG010754
GO:0006004	P	fucose metabolic process	23	9153	43	23397	0.04	1	// CCG022413 // CCG008397 // CCG009931 // CCG012623 // CCG022451 // CCG006336 // CCG008647 // CCG016588 // CCG002377 // CCG025875 // CCG026198 // CCG016590 // CCG019075 // CCG027915 // CCG027914 // CCG006550 // CCG019675 // CCG019674 // CCG012990 // CCG014906 // CCG026351 // CCG007076 // CCG004549
GO:0008272	P	sulfate transport	15	9153	26	23397	0.043	1	// CCG004366 // CCG004934 // CCG006403 // CCG003001 // CCG005539 // CCG004245 // CCG019873 // CCG006402 // CCG020044 // CCG020043 // CCG005047 // CCG005046 // CCG004933 // CCG029206 // CCG007857
GO:1903506	P	regulation of nucleic acid-templated transcription	726	9153	1761	23397	0.043	1	// CCG010166 // CCG024994 // CCG020343 // CCG000659 // CCG002871 // CCG014165 // CCG002874 // CCG029506 // CCG012310 // CCG003324 // CCG003441 // CCG027638 // CCG011363 // CCG003996 // CCG027637 // CCG011367 // CCG024908 // CCG006025 // CCG023961 // CCG009425 // CCG004801 // CCG013290 // CCG012824 // CCG021266 // CCG012227 // CCG002918 // CCG011946 // CCG023809 // CCG027831 // CCG020295 // CCG026…
GO:0043086	P	negative regulation of catalytic activity	64	9153	137	23397	0.043	1	// CCG022404 // CCG027448 // CCG026394 // CCG015406 // CCG029179 // CCG029178 // CCG019828 // CCG019829 // CCG009184 // CCG021378 // CCG007470 // CCG015488 // CCG015489 // CCG021682 // CCG000006 // CCG021680 // CCG011604 // CCG027824 // CCG025087 // CCG024409 // CCG027450 // CCG000513 // CCG014406 // CCG008880 // CCG003401 // CCG026203 // CCG012089 // CCG024198 // CCG019833 // CCG017462 // CCG021…
GO:2001141	P	regulation of RNA biosynthetic process	726	9153	1761	23397	0.043	1	// CCG010166 // CCG024994 // CCG020343 // CCG000659 // CCG002871 // CCG014165 // CCG002874 // CCG029506 // CCG012310 // CCG003324 // CCG003441 // CCG027638 // CCG011363 // CCG003996 // CCG027637 // CCG011367 // CCG024908 // CCG006025 // CCG023961 // CCG009425 // CCG004801 // CCG013290 // CCG012824 // CCG021266 // CCG012227 // CCG002918 // CCG011946 // CCG023809 // CCG027831 // CCG020295 // CCG026…
GO:1902358	P	sulfate transmembrane transport	15	9153	26	23397	0.043	1	// CCG004366 // CCG004934 // CCG006403 // CCG003001 // CCG005539 // CCG004245 // CCG019873 // CCG006402 // CCG020044 // CCG020043 // CCG005047 // CCG005046 // CCG004933 // CCG029206 // CCG007857
GO:0000272	P	polysaccharide catabolic process	72	9153	156	23397	0.044	1	// CCG022404 // CCG000828 // CCG017322 // CCG015021 // CCG024592 // CCG005489 // CCG029179 // CCG029177 // CCG006013 // CCG004441 // CCG008880 // CCG015105 // CCG018002 // CCG015103 // CCG015758 // CCG015759 // CCG006666 // CCG004270 // CCG002421 // CCG027824 // CCG025748 // CCG006951 // CCG024804 // CCG027986 // CCG028713 // CCG002011 // CCG007840 // CCG028675 // CCG028032 // CCG002017 // CCG009…
GO:1902047	P	polyamine transmembrane transport	6	9153	8	23397	0.045	1	// CCG006565 // CCG011310 // CCG009519 // CCG009522 // CCG022666 // CCG022667
GO:1903533	P	regulation of protein targeting	6	9153	8	23397	0.045	1	// CCG013927 // CCG013926 // CCG000460 // CCG013600 // CCG003453 // CCG028115
GO:0042362	P	fat-soluble vitamin biosynthetic process	6	9153	8	23397	0.045	1	// CCG013111 // CCG001860 // CCG008510 // CCG020062 // CCG008694 // CCG026663
GO:0009903	P	chloroplast avoidance movement	6	9153	8	23397	0.045	1	// CCG015711 // CCG024975 // CCG012120 // CCG027588 // CCG020959 // CCG024760
GO:0009696	P	salicylic acid metabolic process	6	9153	8	23397	0.045	1	// CCG016755 // CCG016754 // CCG028622 // CCG013189 // CCG001830 // CCG001831
GO:0009435	P	NAD biosynthetic process	6	9153	8	23397	0.045	1	// CCG014309 // CCG012067 // CCG013392 // CCG013391 // CCG005096 // CCG025056
GO:0010337	P	regulation of salicylic acid metabolic process	6	9153	8	23397	0.045	1	// CCG016755 // CCG016754 // CCG028622 // CCG013189 // CCG001830 // CCG001831
GO:0006775	P	fat-soluble vitamin metabolic process	6	9153	8	23397	0.045	1	// CCG013111 // CCG001860 // CCG008510 // CCG020062 // CCG008694 // CCG026663
GO:0009650	P	UV protection	6	9153	8	23397	0.045	1	// CCG014168 // CCG014171 // CCG014170 // CCG014166 // CCG014167 // CCG021495
GO:0072488	P	ammonium transmembrane transport	11	9153	18	23397	0.049	1	// CCG012528 // CCG005517 // CCG027981 // CCG029254 // CCG009941 // CCG005518 // CCG012438 // CCG008460 // CCG029253 // CCG014860 // CCG008458
GO:2000070	P	regulation of response to water deprivation	7	9153	10	23397	0.049	1	// CCG024088 // CCG006437 // CCG015261 // CCG000717 // CCG007347 // CCG008091 // CCG007448
GO:0007052	P	mitotic spindle organization	7	9153	10	23397	0.049	1	// CCG021259 // CCG026788 // CCG022438 // CCG015025 // CCG006594 // CCG005853 // CCG006922
GO:0015696	P	ammonium transport	11	9153	18	23397	0.049	1	// CCG012528 // CCG005517 // CCG027981 // CCG029254 // CCG009941 // CCG005518 // CCG012438 // CCG008460 // CCG029253 // CCG014860 // CCG008458
GO:0051017	P	actin filament bundle assembly	10	9153	16	23397	0.05	1	// CCG003008 // CCG006359 // CCG009742 // CCG025802 // CCG007284 // CCG003007 // CCG024417 // CCG019461 // CCG006893 // CCG008458
GO:0019363	P	pyridine nucleotide biosynthetic process	8	9153	12	23397	0.05	1	// CCG014309 // CCG027666 // CCG013391 // CCG013392 // CCG012067 // CCG025056 // CCG023135 // CCG005096
GO:0032386	P	regulation of intracellular transport	10	9153	16	23397	0.05	1	// CCG007747 // CCG011838 // CCG013901 // CCG013926 // CCG000460 // CCG013835 // CCG013600 // CCG013927 // CCG003453 // CCG028115
GO:0019359	P	nicotinamide nucleotide biosynthetic process	8	9153	12	23397	0.05	1	// CCG014309 // CCG027666 // CCG013391 // CCG013392 // CCG012067 // CCG025056 // CCG023135 // CCG005096
GO:0006558	P	L-phenylalanine metabolic process	8	9153	12	23397	0.05	1	// CCG012235 // CCG008154 // CCG009757 // CCG026636 // CCG008622 // CCG025597 // CCG005947 // CCG011476
GO:0030026	P	cellular manganese ion homeostasis	8	9153	12	23397	0.05	1	// CCG004214 // CCG025432 // CCG025434 // CCG025127 // CCG025109 // CCG004022 // CCG004023 // CCG004021
GO:0010469	P	regulation of receptor activity	8	9153	12	23397	0.05	1	// CCG011989 // CCG008835 // CCG008153 // CCG007265 // CCG000507 // CCG000508 // CCG017538 // CCG027371
GO:0061572	P	actin filament bundle organization	10	9153	16	23397	0.05	1	// CCG003008 // CCG006359 // CCG009742 // CCG025802 // CCG007284 // CCG003007 // CCG024417 // CCG019461 // CCG006893 // CCG008458
GO:0008194	F	UDP-glycosyltransferase activity	231	9153	398	23397	3.3e-14	1.1e-10	// CCG005794 // CCG010485 // CCG013954 // CCG015169 // CCG010483 // CCG018955 // CCG025716 // CCG006357 // CCG014717 // CCG019769 // CCG012023 // CCG024399 // CCG013411 // CCG019760 // CCG004057 // CCG021880 // CCG017374 // CCG011971 // CCG002498 // CCG008035 // CCG003523 // CCG025268 // CCG023133 // CCG021360 // CCG009377 // CCG018835 // CCG000994 // CCG010767 // CCG018838 // CCG029580 // CCG021…
GO:0035251	F	UDP-glucosyltransferase activity	177	9153	289	23397	3.8e-14	1.1e-10	// CCG010485 // CCG013954 // CCG015169 // CCG010483 // CCG006357 // CCG014717 // CCG019769 // CCG012023 // CCG008704 // CCG008700 // CCG004057 // CCG021880 // CCG017374 // CCG011971 // CCG008035 // CCG003523 // CCG007046 // CCG010767 // CCG018838 // CCG008145 // CCG005406 // CCG015178 // CCG022246 // CCG022245 // CCG020194 // CCG020195 // CCG020196 // CCG006840 // CCG010792 // CCG006349 // CCG007…
GO:0016684	F	oxidoreductase activity, acting on peroxide as acceptor	115	9153	171	23397	1.2e-13	1.7e-10	// CCG008824 // CCG027642 // CCG013813 // CCG000922 // CCG014370 // CCG018479 // CCG000125 // CCG000124 // CCG010374 // CCG005419 // CCG014175 // CCG020952 // CCG020955 // CCG010578 // CCG010314 // CCG000339 // CCG023924 // CCG024749 // CCG024748 // CCG021834 // CCG012178 // CCG012177 // CCG012175 // CCG029399 // CCG029398 // CCG014250 // CCG016481 // CCG009430 // CCG014691 // CCG002890 // CCG002…
GO:0004601	F	peroxidase activity	115	9153	171	23397	1.2e-13	1.7e-10	// CCG008824 // CCG027642 // CCG013813 // CCG000922 // CCG014370 // CCG018479 // CCG000125 // CCG000124 // CCG010374 // CCG005419 // CCG014175 // CCG020952 // CCG020955 // CCG010578 // CCG010314 // CCG000339 // CCG023924 // CCG024749 // CCG024748 // CCG021834 // CCG012178 // CCG012177 // CCG012175 // CCG029399 // CCG029398 // CCG014250 // CCG016481 // CCG009430 // CCG014691 // CCG002890 // CCG002…
GO:0046527	F	glucosyltransferase activity	180	9153	305	23397	2.5e-12	2.9e-09	// CCG010485 // CCG013954 // CCG015169 // CCG010483 // CCG006357 // CCG014717 // CCG019769 // CCG012023 // CCG008704 // CCG008700 // CCG004057 // CCG021880 // CCG017374 // CCG011971 // CCG008035 // CCG003523 // CCG007046 // CCG010767 // CCG018838 // CCG008145 // CCG005406 // CCG015178 // CCG022246 // CCG022245 // CCG020194 // CCG020195 // CCG020196 // CCG006840 // CCG010792 // CCG006349 // CCG007…
GO:0003700	F	transcription factor activity, sequence-specific DNA binding	419	9153	825	23397	1.7e-11	1.4e-08	// CCG000659 // CCG014771 // CCG002874 // CCG029506 // CCG012310 // CCG011593 // CCG027638 // CCG011363 // CCG027637 // CCG024908 // CCG006025 // CCG009425 // CCG004801 // CCG013290 // CCG012824 // CCG012227 // CCG011941 // CCG027831 // CCG020295 // CCG007054 // CCG029573 // CCG020926 // CCG003217 // CCG023415 // CCG014256 // CCG000943 // CCG028301 // CCG014314 // CCG006114 // CCG008884 // CCG010…
GO:0001071	F	nucleic acid binding transcription factor activity	419	9153	825	23397	1.7e-11	1.4e-08	// CCG000659 // CCG014771 // CCG002874 // CCG029506 // CCG012310 // CCG011593 // CCG027638 // CCG011363 // CCG027637 // CCG024908 // CCG006025 // CCG009425 // CCG004801 // CCG013290 // CCG012824 // CCG012227 // CCG011941 // CCG027831 // CCG020295 // CCG007054 // CCG029573 // CCG020926 // CCG003217 // CCG023415 // CCG014256 // CCG000943 // CCG028301 // CCG014314 // CCG006114 // CCG008884 // CCG010…
GO:0016758	F	transferase activity, transferring hexosyl groups	303	9153	573	23397	3.2e-11	2.3e-08	// CCG022413 // CCG010485 // CCG013954 // CCG005794 // CCG015169 // CCG004452 // CCG013745 // CCG029138 // CCG025716 // CCG014717 // CCG007062 // CCG014456 // CCG014448 // CCG019769 // CCG013412 // CCG012023 // CCG016441 // CCG015180 // CCG013411 // CCG018955 // CCG019760 // CCG004057 // CCG021880 // CCG017374 // CCG011971 // CCG010483 // CCG016391 // CCG019296 // CCG009696 // CCG004886 // CCG004…
GO:0016209	F	antioxidant activity	144	9153	244	23397	3.4e-10	2e-07	// CCG020651 // CCG004818 // CCG008824 // CCG027642 // CCG013813 // CCG000922 // CCG014370 // CCG018479 // CCG000125 // CCG000124 // CCG005349 // CCG010374 // CCG005419 // CCG014175 // CCG026105 // CCG020952 // CCG020955 // CCG010578 // CCG009291 // CCG000339 // CCG023924 // CCG024749 // CCG024748 // CCG001843 // CCG012178 // CCG012177 // CCG012175 // CCG017983 // CCG029399 // CCG029398 // CCG014…
GO:0080044	F	quercetin 7-O-glucosyltransferase activity	112	9153	180	23397	3.8e-10	2e-07	// CCG010485 // CCG010483 // CCG014717 // CCG019769 // CCG002711 // CCG008700 // CCG017374 // CCG011971 // CCG008035 // CCG003523 // CCG018838 // CCG022246 // CCG022245 // CCG010792 // CCG006349 // CCG025588 // CCG025589 // CCG028021 // CCG025580 // CCG026007 // CCG025584 // CCG008765 // CCG025277 // CCG025275 // CCG008761 // CCG008768 // CCG014719 // CCG006358 // CCG008704 // CCG026220 // CCG028…
GO:0080043	F	quercetin 3-O-glucosyltransferase activity	112	9153	180	23397	3.8e-10	2e-07	// CCG010485 // CCG010483 // CCG014717 // CCG019769 // CCG002711 // CCG008700 // CCG017374 // CCG011971 // CCG008035 // CCG003523 // CCG018838 // CCG022246 // CCG022245 // CCG010792 // CCG006349 // CCG025588 // CCG025589 // CCG028021 // CCG025580 // CCG026007 // CCG025584 // CCG008765 // CCG025277 // CCG025275 // CCG008761 // CCG008768 // CCG014719 // CCG006358 // CCG008704 // CCG026220 // CCG028…
GO:0020037	F	heme binding	292	9153	560	23397	4.9e-10	2.3e-07	// CCG007612 // CCG025129 // CCG025722 // CCG027642 // CCG000922 // CCG006687 // CCG023924 // CCG006251 // CCG028897 // CCG014370 // CCG014777 // CCG015201 // CCG013505 // CCG013504 // CCG000125 // CCG000124 // CCG010374 // CCG005419 // CCG006434 // CCG014175 // CCG020952 // CCG012061 // CCG020955 // CCG012062 // CCG013096 // CCG013095 // CCG013094 // CCG028446 // CCG028447 // CCG028444 // CCG029…
GO:0046906	F	tetrapyrrole binding	304	9153	589	23397	9.1e-10	4e-07	// CCG007612 // CCG025129 // CCG025722 // CCG027642 // CCG000922 // CCG006687 // CCG023924 // CCG006251 // CCG028897 // CCG014370 // CCG014777 // CCG015201 // CCG013505 // CCG013504 // CCG000125 // CCG000124 // CCG010374 // CCG005419 // CCG006434 // CCG014175 // CCG020952 // CCG012061 // CCG020955 // CCG012062 // CCG013096 // CCG013095 // CCG013094 // CCG028446 // CCG028447 // CCG028444 // CCG029…
GO:0016757	F	transferase activity, transferring glycosyl groups	395	9153	792	23397	1.1e-09	4.3e-07	// CCG025717 // CCG010854 // CCG004057 // CCG009927 // CCG012319 // CCG008035 // CCG004058 // CCG019329 // CCG010767 // CCG015178 // CCG017912 // CCG021264 // CCG006550 // CCG017495 // CCG007059 // CCG013512 // CCG016784 // CCG020294 // CCG028309 // CCG008397 // CCG016588 // CCG021360 // CCG017561 // CCG017560 // CCG018350 // CCG003967 // CCG003965 // CCG026490 // CCG007526 // CCG007527 // CCG004…
GO:0019199	F	transmembrane receptor protein kinase activity	136	9153	234	23397	4e-09	1.5e-06	// CCG022417 // CCG022416 // CCG010249 // CCG005493 // CCG009614 // CCG019779 // CCG018773 // CCG018772 // CCG007244 // CCG014174 // CCG009055 // CCG001500 // CCG010572 // CCG007966 // CCG016319 // CCG016317 // CCG003991 // CCG009987 // CCG010498 // CCG010499 // CCG005865 // CCG015748 // CCG008719 // CCG029372 // CCG025450 // CCG011772 // CCG012308 // CCG007610 // CCG016472 // CCG000945 // CCG001…
GO:0008422	F	beta-glucosidase activity	56	9153	78	23397	5.4e-09	1.9e-06	// CCG026422 // CCG008394 // CCG008390 // CCG008391 // CCG008395 // CCG006113 // CCG005961 // CCG003014 // CCG005705 // CCG005166 // CCG023714 // CCG023713 // CCG027874 // CCG016939 // CCG016935 // CCG016934 // CCG019660 // CCG010431 // CCG028619 // CCG008393 // CCG028713 // CCG028633 // CCG011453 // CCG028040 // CCG012630 // CCG012631 // CCG026433 // CCG012453 // CCG024460 // CCG022386 // CCG022…
GO:0016628	F	oxidoreductase activity, acting on the CH-CH group of donors, NAD or NADP as acceptor	211	9153	397	23397	1.4e-08	4.7e-06	// CCG028202 // CCG018772 // CCG003119 // CCG003118 // CCG013585 // CCG008828 // CCG005493 // CCG021443 // CCG028166 // CCG000650 // CCG016711 // CCG007200 // CCG017622 // CCG002877 // CCG002876 // CCG009916 // CCG027872 // CCG004051 // CCG015366 // CCG007043 // CCG010161 // CCG013393 // CCG004698 // CCG011363 // CCG012416 // CCG010884 // CCG029692 // CCG023400 // CCG011780 // CCG026925 // CCG005…
GO:0015926	F	glucosidase activity	65	9153	97	23397	2.8e-08	8.7e-06	// CCG026422 // CCG008394 // CCG006019 // CCG008391 // CCG008395 // CCG006113 // CCG005961 // CCG003014 // CCG023717 // CCG005705 // CCG005166 // CCG023714 // CCG023713 // CCG027874 // CCG016939 // CCG008390 // CCG016935 // CCG016934 // CCG019660 // CCG010431 // CCG028619 // CCG008393 // CCG028713 // CCG028633 // CCG004557 // CCG011453 // CCG024193 // CCG028040 // CCG018559 // CCG015718 // CCG012…
GO:0016491	F	oxidoreductase activity	1197	9153	2698	23397	8.6e-08	2.4e-05	// CCG007465 // CCG027491 // CCG010161 // CCG013585 // CCG027642 // CCG000650 // CCG016711 // CCG022649 // CCG007199 // CCG018479 // CCG017622 // CCG014777 // CCG002876 // CCG023247 // CCG015531 // CCG012290 // CCG000125 // CCG000124 // CCG004051 // CCG005419 // CCG006434 // CCG014175 // CCG008034 // CCG008997 // CCG002509 // CCG011363 // CCG028692 // CCG013095 // CCG013094 // CCG010884 // CCG014…
GO:0004871	F	signal transducer activity	289	9153	577	23397	8.7e-08	2.4e-05	// CCG000718 // CCG027648 // CCG022417 // CCG022416 // CCG003119 // CCG020347 // CCG010002 // CCG019272 // CCG001588 // CCG010690 // CCG009614 // CCG021468 // CCG018773 // CCG027655 // CCG005517 // CCG018772 // CCG011808 // CCG008335 // CCG014831 // CCG014832 // CCG001340 // CCG029182 // CCG007244 // CCG014174 // CCG011804 // CCG009055 // CCG001500 // CCG010572 // CCG007966 // CCG016319 // CCG016…
GO:0099600	F	transmembrane receptor activity	159	9153	292	23397	1e-07	2.7e-05	// CCG027648 // CCG022417 // CCG022416 // CCG010249 // CCG005493 // CCG026633 // CCG009614 // CCG019779 // CCG018773 // CCG027655 // CCG018772 // CCG007244 // CCG014174 // CCG009055 // CCG001500 // CCG010572 // CCG007966 // CCG016319 // CCG016317 // CCG003991 // CCG027659 // CCG027653 // CCG027656 // CCG027657 // CCG010498 // CCG010499 // CCG005865 // CCG015748 // CCG008719 // CCG029372 // CCG025…
GO:0004888	F	transmembrane signaling receptor activity	157	9153	289	23397	1.5e-07	3.7e-05	// CCG027648 // CCG022417 // CCG022416 // CCG010249 // CCG005493 // CCG026633 // CCG009614 // CCG019779 // CCG018773 // CCG027655 // CCG018772 // CCG007244 // CCG014174 // CCG009055 // CCG001500 // CCG010572 // CCG007966 // CCG016319 // CCG016317 // CCG003991 // CCG027659 // CCG027653 // CCG027656 // CCG027657 // CCG010498 // CCG010499 // CCG005865 // CCG015748 // CCG008719 // CCG029372 // CCG025…
GO:0032440	F	2-alkenal reductase [NAD(P)] activity	180	9153	340	23397	2.1e-07	5.2e-05	// CCG028202 // CCG018772 // CCG003119 // CCG003118 // CCG013585 // CCG005493 // CCG028166 // CCG000650 // CCG016711 // CCG007200 // CCG017622 // CCG002877 // CCG002876 // CCG009916 // CCG004051 // CCG007043 // CCG010161 // CCG013393 // CCG004698 // CCG011363 // CCG012416 // CCG028111 // CCG023400 // CCG011780 // CCG026925 // CCG005973 // CCG001723 // CCG023647 // CCG017407 // CCG003511 // CCG003…
GO:0001135	F	transcription factor activity, RNA polymerase II transcription factor recruiting	81	9153	134	23397	5.3e-07	0.00012	// CCG019253 // CCG014609 // CCG022748 // CCG009881 // CCG021447 // CCG028301 // CCG011090 // CCG024276 // CCG001779 // CCG028917 // CCG024452 // CCG012589 // CCG011910 // CCG005163 // CCG003975 // CCG025233 // CCG014771 // CCG021684 // CCG014621 // CCG004346 // CCG016610 // CCG023718 // CCG020280 // CCG027532 // CCG026711 // CCG008071 // CCG015247 // CCG004093 // CCG009794 // CCG002834 // CCG019…
GO:0004553	F	hydrolase activity, hydrolyzing O-glycosyl compounds	242	9153	481	23397	5.5e-07	0.00012	// CCG029177 // CCG008530 // CCG026961 // CCG001719 // CCG001431 // CCG000285 // CCG025101 // CCG023731 // CCG007204 // CCG002907 // CCG010968 // CCG015335 // CCG006666 // CCG016441 // CCG019764 // CCG019763 // CCG014984 // CCG006660 // CCG022154 // CCG015337 // CCG012317 // CCG016391 // CCG007504 // CCG028619 // CCG027829 // CCG004058 // CCG004452 // CCG004756 // CCG009115 // CCG012391 // CCG009…
GO:0004713	F	protein tyrosine kinase activity	164	9153	309	23397	5.6e-07	0.00012	// CCG027727 // CCG027844 // CCG018773 // CCG010249 // CCG005493 // CCG010690 // CCG025046 // CCG004952 // CCG002816 // CCG014831 // CCG007966 // CCG016319 // CCG016317 // CCG006869 // CCG022793 // CCG007496 // CCG003991 // CCG007495 // CCG023400 // CCG022567 // CCG005865 // CCG022562 // CCG023880 // CCG008719 // CCG022569 // CCG022568 // CCG012982 // CCG012983 // CCG025450 // CCG005543 // CCG022…
GO:0016798	F	hydrolase activity, acting on glycosyl bonds	259	9153	521	23397	8e-07	0.00017	// CCG029177 // CCG008530 // CCG009587 // CCG001719 // CCG001431 // CCG000285 // CCG025101 // CCG023731 // CCG007204 // CCG002907 // CCG010968 // CCG015335 // CCG006666 // CCG016441 // CCG019764 // CCG019763 // CCG014984 // CCG006660 // CCG022154 // CCG015337 // CCG012317 // CCG016391 // CCG007504 // CCG028619 // CCG026205 // CCG027829 // CCG004058 // CCG004452 // CCG004756 // CCG009115 // CCG012…
GO:0001134	F	transcription factor activity, transcription factor recruiting	82	9153	138	23397	1.2e-06	0.00025	// CCG019253 // CCG014609 // CCG022748 // CCG009881 // CCG021447 // CCG028301 // CCG011090 // CCG024276 // CCG001779 // CCG028917 // CCG024452 // CCG012589 // CCG011910 // CCG005163 // CCG003975 // CCG025233 // CCG014771 // CCG021684 // CCG014621 // CCG004346 // CCG016610 // CCG023718 // CCG020280 // CCG027532 // CCG026711 // CCG008071 // CCG005647 // CCG015247 // CCG004093 // CCG009794 // CCG002…
GO:0004872	F	receptor activity	174	9153	336	23397	2e-06	0.00037	// CCG027648 // CCG022417 // CCG022416 // CCG010249 // CCG003114 // CCG026633 // CCG009614 // CCG019779 // CCG018773 // CCG027655 // CCG018772 // CCG007244 // CCG014174 // CCG009055 // CCG001500 // CCG010572 // CCG007966 // CCG016319 // CCG016317 // CCG003991 // CCG004199 // CCG005493 // CCG025457 // CCG027653 // CCG027656 // CCG027657 // CCG010498 // CCG010499 // CCG005865 // CCG015748 // CCG008…
GO:0060089	F	molecular transducer activity	174	9153	336	23397	2e-06	0.00037	// CCG027648 // CCG022417 // CCG022416 // CCG010249 // CCG003114 // CCG026633 // CCG009614 // CCG019779 // CCG018773 // CCG027655 // CCG018772 // CCG007244 // CCG014174 // CCG009055 // CCG001500 // CCG010572 // CCG007966 // CCG016319 // CCG016317 // CCG003991 // CCG004199 // CCG005493 // CCG025457 // CCG027653 // CCG027656 // CCG027657 // CCG010498 // CCG010499 // CCG005865 // CCG015748 // CCG008…
GO:0043565	F	sequence-specific DNA binding	358	9153	752	23397	2e-06	0.00037	// CCG025717 // CCG000659 // CCG014771 // CCG002874 // CCG004057 // CCG029506 // CCG012310 // CCG010767 // CCG011363 // CCG013290 // CCG012824 // CCG027831 // CCG020295 // CCG026238 // CCG007054 // CCG017989 // CCG003217 // CCG014256 // CCG028301 // CCG014314 // CCG021360 // CCG008556 // CCG010942 // CCG019820 // CCG005647 // CCG001488 // CCG029711 // CCG029712 // CCG027065 // CCG009881 // CCG007…
GO:0004675	F	transmembrane receptor protein serine/threonine kinase activity	93	9153	162	23397	2.1e-06	0.00037	// CCG022417 // CCG022416 // CCG010249 // CCG009614 // CCG024788 // CCG018773 // CCG018772 // CCG007244 // CCG014174 // CCG009055 // CCG001500 // CCG010572 // CCG007966 // CCG003991 // CCG009987 // CCG010498 // CCG010499 // CCG005865 // CCG015748 // CCG019779 // CCG029372 // CCG011772 // CCG012308 // CCG007610 // CCG001654 // CCG001655 // CCG012443 // CCG004996 // CCG019666 // CCG022987 // CCG016…
GO:0016627	F	oxidoreductase activity, acting on the CH-CH group of donors	254	9153	517	23397	3.1e-06	0.00054	// CCG016990 // CCG028202 // CCG018772 // CCG003119 // CCG003118 // CCG013585 // CCG006509 // CCG005493 // CCG021443 // CCG028166 // CCG000650 // CCG016711 // CCG007199 // CCG007200 // CCG017622 // CCG013267 // CCG002877 // CCG002876 // CCG013505 // CCG013504 // CCG013506 // CCG027872 // CCG004051 // CCG015366 // CCG007043 // CCG010161 // CCG010884 // CCG013393 // CCG004698 // CCG028448 // CCG012…
GO:0004715	F	non-membrane spanning protein tyrosine kinase activity	96	9153	170	23397	3.9e-06	0.00064	// CCG027727 // CCG024805 // CCG010249 // CCG010690 // CCG025046 // CCG004952 // CCG007966 // CCG007492 // CCG007493 // CCG022793 // CCG007496 // CCG003991 // CCG007495 // CCG005865 // CCG023880 // CCG022569 // CCG012982 // CCG012983 // CCG005543 // CCG022800 // CCG007610 // CCG012443 // CCG008250 // CCG023266 // CCG023265 // CCG023264 // CCG016677 // CCG004630 // CCG000476 // CCG024840 // CCG005…
GO:0038023	F	signaling receptor activity	168	9153	328	23397	6.9e-06	0.0011	// CCG027648 // CCG022417 // CCG022416 // CCG010249 // CCG005493 // CCG026633 // CCG009614 // CCG019779 // CCG018773 // CCG027655 // CCG018772 // CCG007244 // CCG014174 // CCG009055 // CCG001500 // CCG010572 // CCG007966 // CCG016319 // CCG016317 // CCG003991 // CCG027659 // CCG025457 // CCG027653 // CCG027656 // CCG027657 // CCG010498 // CCG010499 // CCG005865 // CCG015748 // CCG008719 // CCG029…
GO:0016760	F	cellulose synthase (UDP-forming) activity	28	9153	37	23397	7e-06	0.0011	// CCG013954 // CCG029132 // CCG021360 // CCG007062 // CCG013409 // CCG011938 // CCG004057 // CCG025716 // CCG004097 // CCG004096 // CCG010767 // CCG010740 // CCG012924 // CCG001918 // CCG025019 // CCG001917 // CCG001916 // CCG025717 // CCG008205 // CCG013412 // CCG013411 // CCG027589 // CCG008145 // CCG007059 // CCG007526 // CCG015969 // CCG010754 // CCG015901
GO:0016759	F	cellulose synthase activity	28	9153	37	23397	7e-06	0.0011	// CCG013954 // CCG029132 // CCG021360 // CCG007062 // CCG013409 // CCG011938 // CCG004057 // CCG025716 // CCG004097 // CCG004096 // CCG010767 // CCG010740 // CCG012924 // CCG001918 // CCG025019 // CCG001917 // CCG001916 // CCG025717 // CCG008205 // CCG013412 // CCG013411 // CCG027589 // CCG008145 // CCG007059 // CCG007526 // CCG015969 // CCG010754 // CCG015901
GO:0016705	F	oxidoreductase activity, acting on paired donors, with incorporation or reduction of molecular oxygen	275	9153	571	23397	9.1e-06	0.0014	// CCG014539 // CCG025129 // CCG001423 // CCG025722 // CCG002629 // CCG028164 // CCG002625 // CCG016902 // CCG009345 // CCG028897 // CCG014777 // CCG015201 // CCG008276 // CCG013505 // CCG013504 // CCG013506 // CCG008043 // CCG011603 // CCG000551 // CCG008997 // CCG028448 // CCG012061 // CCG012060 // CCG012062 // CCG028692 // CCG013095 // CCG013094 // CCG028446 // CCG010884 // CCG028444 // CCG029…
GO:0000981	F	RNA polymerase II transcription factor activity, sequence-specific DNA binding	118	9153	220	23397	1e-05	0.0015	// CCG009227 // CCG024148 // CCG018266 // CCG014609 // CCG003853 // CCG002874 // CCG027532 // CCG011606 // CCG016014 // CCG019293 // CCG007963 // CCG012793 // CCG011363 // CCG004693 // CCG021824 // CCG004694 // CCG004697 // CCG000934 // CCG002353 // CCG013290 // CCG003866 // CCG016450 // CCG028607 // CCG027831 // CCG014696 // CCG024621 // CCG026338 // CCG003217 // CCG022748 // CCG008414 // CCG028…
GO:0004180	F	carboxypeptidase activity	45	9153	70	23397	1.9e-05	0.0026	// CCG000215 // CCG004936 // CCG017523 // CCG008539 // CCG026977 // CCG007343 // CCG005908 // CCG005909 // CCG025166 // CCG002569 // CCG006768 // CCG022725 // CCG021197 // CCG017567 // CCG002050 // CCG029561 // CCG018819 // CCG004538 // CCG004539 // CCG005320 // CCG017524 // CCG029140 // CCG017522 // CCG015978 // CCG002179 // CCG017521 // CCG015394 // CCG015393 // CCG021891 // CCG006770 // CCG018…
GO:0003777	F	microtubule motor activity	50	9153	80	23397	2.1e-05	0.0028	// CCG000755 // CCG002427 // CCG026522 // CCG023890 // CCG001961 // CCG027761 // CCG000869 // CCG020301 // CCG018269 // CCG023528 // CCG019847 // CCG006603 // CCG019826 // CCG001305 // CCG013015 // CCG017645 // CCG008073 // CCG001549 // CCG027206 // CCG023793 // CCG027014 // CCG007519 // CCG027866 // CCG013150 // CCG028291 // CCG029460 // CCG002507 // CCG001745 // CCG021822 // CCG015033 // CCG003…
GO:0102483	F	scopolin beta-glucosidase activity	23	9153	30	23397	3.3e-05	0.0044	// CCG008394 // CCG008395 // CCG008390 // CCG008391 // CCG008393 // CCG003014 // CCG027874 // CCG028619 // CCG028040 // CCG012630 // CCG012631 // CCG012453 // CCG024460 // CCG008389 // CCG020047 // CCG004107 // CCG024859 // CCG028042 // CCG028620 // CCG010208 // CCG013978 // CCG006932 // CCG006937
GO:0004497	F	monooxygenase activity	225	9153	466	23397	4.3e-05	0.0057	// CCG002742 // CCG009750 // CCG014539 // CCG025129 // CCG001423 // CCG025722 // CCG028164 // CCG002625 // CCG020054 // CCG017654 // CCG014777 // CCG015201 // CCG013505 // CCG013504 // CCG013506 // CCG011603 // CCG010379 // CCG006434 // CCG028448 // CCG012061 // CCG012060 // CCG012062 // CCG028692 // CCG013095 // CCG013094 // CCG028446 // CCG028447 // CCG028444 // CCG029583 // CCG015547 // CCG008…
GO:0016301	F	kinase activity	961	9153	2216	23397	5.5e-05	0.007	// CCG016409 // CCG010162 // CCG021211 // CCG010249 // CCG013585 // CCG020347 // CCG010243 // CCG023938 // CCG020226 // CCG018773 // CCG017622 // CCG007060 // CCG002876 // CCG018772 // CCG011808 // CCG022731 // CCG004051 // CCG003320 // CCG012319 // CCG014174 // CCG011804 // CCG022798 // CCG007492 // CCG007493 // CCG022793 // CCG007496 // CCG003991 // CCG007495 // CCG014049 // CCG019475 // CCG008…
GO:0033764	F	steroid dehydrogenase activity, acting on the CH-OH group of donors, NAD or NADP as acceptor	32	9153	47	23397	5.6e-05	0.0071	// CCG024890 // CCG008009 // CCG006644 // CCG004975 // CCG006643 // CCG016936 // CCG010807 // CCG013545 // CCG013544 // CCG013546 // CCG018973 // CCG009297 // CCG018508 // CCG018509 // CCG007252 // CCG008007 // CCG023447 // CCG010957 // CCG010959 // CCG010958 // CCG000247 // CCG028559 // CCG006636 // CCG009942 // CCG015436 // CCG015272 // CCG015274 // CCG008008 // CCG029661 // CCG006638 // CCG017…
GO:0004709	F	MAP kinase kinase kinase activity	90	9153	166	23397	6.2e-05	0.0076	// CCG010162 // CCG020347 // CCG010690 // CCG021468 // CCG011808 // CCG008335 // CCG014831 // CCG014832 // CCG029182 // CCG011804 // CCG002492 // CCG022797 // CCG005973 // CCG010498 // CCG010499 // CCG009622 // CCG022561 // CCG022560 // CCG019779 // CCG022569 // CCG022568 // CCG006710 // CCG015270 // CCG003351 // CCG011461 // CCG022800 // CCG026782 // CCG022572 // CCG016585 // CCG025966 // CCG028…
GO:0008017	F	microtubule binding	68	9153	120	23397	7.9e-05	0.0094	// CCG000755 // CCG019434 // CCG014631 // CCG025103 // CCG001961 // CCG027761 // CCG020730 // CCG000869 // CCG020301 // CCG022236 // CCG017907 // CCG015041 // CCG017645 // CCG006431 // CCG018269 // CCG019847 // CCG006603 // CCG013150 // CCG001305 // CCG013015 // CCG020283 // CCG011558 // CCG008073 // CCG001549 // CCG002427 // CCG023793 // CCG027014 // CCG007519 // CCG027866 // CCG028291 // CCG029…
GO:0003854	F	3-beta-hydroxy-delta5-steroid dehydrogenase activity	20	9153	26	23397	0.0001	0.012	// CCG024890 // CCG007252 // CCG006636 // CCG009942 // CCG006638 // CCG010807 // CCG013545 // CCG013544 // CCG013546 // CCG006644 // CCG029661 // CCG004975 // CCG018973 // CCG006643 // CCG017431 // CCG010957 // CCG010959 // CCG010958 // CCG009297 // CCG028559
GO:0008374	F	O-acyltransferase activity	83	9153	153	23397	0.00011	0.013	// CCG021150 // CCG009779 // CCG018228 // CCG009027 // CCG000639 // CCG000638 // CCG014092 // CCG029274 // CCG005592 // CCG011914 // CCG022668 // CCG026810 // CCG016483 // CCG016482 // CCG002728 // CCG027292 // CCG007269 // CCG025168 // CCG011867 // CCG010904 // CCG008496 // CCG004055 // CCG002730 // CCG002731 // CCG013568 // CCG023463 // CCG013229 // CCG012318 // CCG000475 // CCG000474 // CCG001…
GO:0016413	F	O-acetyltransferase activity	55	9153	94	23397	0.00011	0.013	// CCG026810 // CCG024477 // CCG018228 // CCG009027 // CCG000639 // CCG000638 // CCG029274 // CCG005592 // CCG011914 // CCG025020 // CCG027292 // CCG009025 // CCG025168 // CCG010904 // CCG008496 // CCG002730 // CCG002731 // CCG013229 // CCG000475 // CCG000474 // CCG001869 // CCG011381 // CCG011382 // CCG011411 // CCG011413 // CCG010742 // CCG010741 // CCG006787 // CCG024886 // CCG009590 // CCG024…
GO:0004185	F	serine-type carboxypeptidase activity	34	9153	52	23397	0.00012	0.013	// CCG000215 // CCG017523 // CCG018819 // CCG026977 // CCG005908 // CCG005909 // CCG025166 // CCG006768 // CCG021197 // CCG017567 // CCG002050 // CCG029561 // CCG004538 // CCG004539 // CCG005320 // CCG017524 // CCG029140 // CCG017522 // CCG017521 // CCG002179 // CCG006770 // CCG022577 // CCG015978 // CCG002569 // CCG010651 // CCG009168 // CCG017519 // CCG004541 // CCG004540 // CCG017513 // CCG001…
GO:0070008	F	serine-type exopeptidase activity	36	9153	56	23397	0.00012	0.014	// CCG000215 // CCG017523 // CCG026977 // CCG005908 // CCG005909 // CCG025166 // CCG014037 // CCG006768 // CCG021197 // CCG017567 // CCG002050 // CCG018819 // CCG004538 // CCG004539 // CCG005320 // CCG017524 // CCG029140 // CCG017522 // CCG015978 // CCG002179 // CCG017521 // CCG006770 // CCG029561 // CCG009467 // CCG022577 // CCG002569 // CCG010651 // CCG009168 // CCG017519 // CCG004541 // CCG004…
GO:0005057	F	receptor signaling protein activity	97	9153	184	23397	0.00014	0.014	// CCG010162 // CCG020347 // CCG010690 // CCG021468 // CCG029210 // CCG011808 // CCG008335 // CCG014831 // CCG014832 // CCG029182 // CCG011804 // CCG002492 // CCG022797 // CCG005973 // CCG010498 // CCG010499 // CCG009622 // CCG022561 // CCG022560 // CCG019779 // CCG022569 // CCG022568 // CCG006710 // CCG015270 // CCG003351 // CCG011461 // CCG022800 // CCG026782 // CCG022572 // CCG016585 // CCG025…
GO:0004702	F	receptor signaling protein serine/threonine kinase activity	97	9153	184	23397	0.00014	0.014	// CCG010162 // CCG020347 // CCG010690 // CCG021468 // CCG029210 // CCG011808 // CCG008335 // CCG014831 // CCG014832 // CCG029182 // CCG011804 // CCG002492 // CCG022797 // CCG005973 // CCG010498 // CCG010499 // CCG009622 // CCG022561 // CCG022560 // CCG019779 // CCG022569 // CCG022568 // CCG006710 // CCG015270 // CCG003351 // CCG011461 // CCG022800 // CCG026782 // CCG022572 // CCG016585 // CCG025…
GO:0015291	F	secondary active transmembrane transporter activity	158	9153	321	23397	0.00017	0.017	// CCG026524 // CCG008438 // CCG001636 // CCG025423 // CCG026914 // CCG026632 // CCG023733 // CCG009619 // CCG009915 // CCG009914 // CCG006949 // CCG006544 // CCG005228 // CCG008889 // CCG012415 // CCG008437 // CCG009112 // CCG023648 // CCG009988 // CCG023647 // CCG011749 // CCG020044 // CCG020043 // CCG003145 // CCG017655 // CCG010817 // CCG006187 // CCG024623 // CCG000849 // CCG022009 // CCG016…
GO:0015238	F	drug transmembrane transporter activity	52	9153	89	23397	0.00018	0.018	// CCG028344 // CCG026524 // CCG014881 // CCG008451 // CCG014882 // CCG028145 // CCG008450 // CCG009733 // CCG001822 // CCG024778 // CCG009734 // CCG006505 // CCG019849 // CCG008889 // CCG023810 // CCG006605 // CCG024008 // CCG014880 // CCG001564 // CCG009914 // CCG016291 // CCG008290 // CCG008293 // CCG015144 // CCG008295 // CCG008294 // CCG015461 // CCG010599 // CCG028394 // CCG007593 // CCG027…
GO:0015297	F	antiporter activity	91	9153	172	23397	0.00018	0.018	// CCG026524 // CCG008438 // CCG001636 // CCG008437 // CCG026632 // CCG009619 // CCG009915 // CCG009914 // CCG006544 // CCG005228 // CCG005227 // CCG026914 // CCG009112 // CCG017655 // CCG006187 // CCG022009 // CCG000849 // CCG015144 // CCG028145 // CCG009733 // CCG008885 // CCG008889 // CCG015461 // CCG023810 // CCG004366 // CCG020937 // CCG016379 // CCG003064 // CCG002273 // CCG000818 // CCG027…
GO:0090484	F	drug transporter activity	52	9153	89	23397	0.00018	0.018	// CCG028344 // CCG026524 // CCG014881 // CCG008451 // CCG014882 // CCG028145 // CCG008450 // CCG009733 // CCG001822 // CCG024778 // CCG009734 // CCG006505 // CCG019849 // CCG008889 // CCG023810 // CCG006605 // CCG024008 // CCG014880 // CCG001564 // CCG009914 // CCG016291 // CCG008290 // CCG008293 // CCG015144 // CCG008295 // CCG008294 // CCG015461 // CCG010599 // CCG028394 // CCG007593 // CCG027…
GO:0004364	F	glutathione transferase activity	44	9153	73	23397	0.00021	0.02	// CCG013817 // CCG013816 // CCG013815 // CCG013813 // CCG013812 // CCG013810 // CCG020327 // CCG020326 // CCG015480 // CCG015481 // CCG011862 // CCG005641 // CCG008015 // CCG020330 // CCG016371 // CCG022971 // CCG011570 // CCG011571 // CCG022875 // CCG022877 // CCG022876 // CCG003206 // CCG028658 // CCG002137 // CCG027672 // CCG007318 // CCG013822 // CCG013823 // CCG013821 // CCG013824 // CCG015…
GO:0042973	F	glucan endo-1,3-beta-D-glucosidase activity	25	9153	36	23397	0.00023	0.021	// CCG026422 // CCG006113 // CCG005961 // CCG005705 // CCG005166 // CCG016939 // CCG019660 // CCG016934 // CCG016935 // CCG010431 // CCG028633 // CCG011453 // CCG026433 // CCG022386 // CCG022385 // CCG025755 // CCG017349 // CCG016942 // CCG016940 // CCG016941 // CCG008619 // CCG021897 // CCG011770 // CCG023121 // CCG017412
GO:0005199	F	structural constituent of cell wall	16	9153	20	23397	0.00024	0.022	// CCG007256 // CCG022784 // CCG022783 // CCG009556 // CCG027040 // CCG000394 // CCG001547 // CCG000390 // CCG000391 // CCG000392 // CCG024889 // CCG026898 // CCG010085 // CCG027689 // CCG025132 // CCG007451
GO:0004672	F	protein kinase activity	720	9153	1657	23397	0.00029	0.026	// CCG010162 // CCG010249 // CCG020347 // CCG019272 // CCG023938 // CCG020226 // CCG018773 // CCG017622 // CCG018772 // CCG011808 // CCG022731 // CCG004051 // CCG003320 // CCG014174 // CCG011804 // CCG022798 // CCG007492 // CCG007493 // CCG022793 // CCG007496 // CCG003991 // CCG007495 // CCG008811 // CCG003267 // CCG010015 // CCG008250 // CCG013293 // CCG014610 // CCG015748 // CCG023964 // CCG015…
GO:0004714	F	transmembrane receptor protein tyrosine kinase activity	54	9153	95	23397	0.00036	0.033	// CCG000945 // CCG001654 // CCG014154 // CCG018773 // CCG002122 // CCG025029 // CCG005493 // CCG001616 // CCG006059 // CCG004836 // CCG014625 // CCG014624 // CCG006509 // CCG002816 // CCG015325 // CCG016488 // CCG014135 // CCG004150 // CCG014626 // CCG014133 // CCG009256 // CCG003257 // CCG011027 // CCG022987 // CCG001364 // CCG017999 // CCG016317 // CCG027362 // CCG001697 // CCG004152 // CCG029…
GO:0001076	F	transcription factor activity, RNA polymerase II transcription factor binding	89	9153	171	23397	0.00043	0.038	// CCG020343 // CCG024148 // CCG014609 // CCG003853 // CCG027532 // CCG019293 // CCG007963 // CCG012793 // CCG004693 // CCG021824 // CCG004694 // CCG004697 // CCG004090 // CCG018070 // CCG002353 // CCG016450 // CCG027831 // CCG014696 // CCG026338 // CCG026339 // CCG022748 // CCG028301 // CCG011090 // CCG024452 // CCG003975 // CCG013728 // CCG014771 // CCG023718 // CCG020280 // CCG005004 // CCG010…
GO:0047213	F	anthocyanidin 3-O-glucosyltransferase activity	19	9153	26	23397	0.00047	0.041	// CCG014069 // CCG006977 // CCG006982 // CCG011840 // CCG014068 // CCG008035 // CCG021252 // CCG021221 // CCG025039 // CCG005795 // CCG005794 // CCG006976 // CCG021246 // CCG025275 // CCG006972 // CCG002498 // CCG013853 // CCG014063 // CCG018349
GO:0015631	F	tubulin binding	70	9153	130	23397	0.00049	0.042	// CCG000755 // CCG019434 // CCG014631 // CCG025103 // CCG001961 // CCG027761 // CCG020730 // CCG000869 // CCG020301 // CCG022236 // CCG017907 // CCG015041 // CCG017645 // CCG006431 // CCG018269 // CCG019847 // CCG006603 // CCG013150 // CCG001305 // CCG013015 // CCG020283 // CCG011558 // CCG008073 // CCG001549 // CCG002427 // CCG023793 // CCG027014 // CCG007519 // CCG027866 // CCG028291 // CCG029…
GO:0016682	F	oxidoreductase activity, acting on diphenols and related substances as donors, oxygen as acceptor	42	9153	71	23397	0.00051	0.043	// CCG007548 // CCG004938 // CCG025686 // CCG025685 // CCG010482 // CCG026178 // CCG025688 // CCG010481 // CCG016918 // CCG000675 // CCG001199 // CCG015101 // CCG016829 // CCG010478 // CCG000431 // CCG010470 // CCG010471 // CCG006940 // CCG024194 // CCG026285 // CCG018238 // CCG018237 // CCG009703 // CCG026288 // CCG014476 // CCG001310 // CCG016085 // CCG004937 // CCG020005 // CCG001313 // CCG024…
GO:0030246	F	carbohydrate binding	232	9153	500	23397	0.00063	0.052	// CCG008530 // CCG001431 // CCG024961 // CCG008012 // CCG007204 // CCG015347 // CCG021468 // CCG006666 // CCG016913 // CCG015346 // CCG010801 // CCG023839 // CCG012317 // CCG001340 // CCG010694 // CCG026203 // CCG004154 // CCG029462 // CCG012391 // CCG012390 // CCG005961 // CCG010497 // CCG026433 // CCG014088 // CCG013598 // CCG025755 // CCG029246 // CCG014087 // CCG013595 // CCG008250 // CCG021…
GO:0003774	F	motor activity	55	9153	99	23397	0.0007	0.057	// CCG000755 // CCG002427 // CCG026522 // CCG023890 // CCG001961 // CCG027761 // CCG000869 // CCG020301 // CCG018269 // CCG019212 // CCG019211 // CCG023528 // CCG019847 // CCG006603 // CCG019826 // CCG001305 // CCG013015 // CCG017645 // CCG008073 // CCG001549 // CCG027206 // CCG023793 // CCG027014 // CCG007519 // CCG027866 // CCG013150 // CCG028291 // CCG029460 // CCG002507 // CCG001745 // CCG021…
GO:0016762	F	xyloglucan:xyloglucosyl transferase activity	23	9153	34	23397	0.00072	0.058	// CCG023899 // CCG029138 // CCG016441 // CCG017963 // CCG022154 // CCG016391 // CCG016792 // CCG027829 // CCG014649 // CCG004058 // CCG021847 // CCG026804 // CCG026961 // CCG023904 // CCG023902 // CCG012993 // CCG023900 // CCG002707 // CCG017884 // CCG017554 // CCG017555 // CCG017552 // CCG004452
GO:0016706	F	oxidoreductase activity, acting on paired donors, with incorporation or reduction of molecular oxygen, 2-oxoglutarate as one donor, and incorporation of one atom each of oxygen into both donors	52	9153	93	23397	0.00078	0.062	// CCG012127 // CCG019068 // CCG015146 // CCG009439 // CCG019066 // CCG023716 // CCG026872 // CCG026875 // CCG009345 // CCG007247 // CCG006769 // CCG018552 // CCG018551 // CCG026084 // CCG012128 // CCG012129 // CCG012124 // CCG012125 // CCG012126 // CCG000551 // CCG001568 // CCG023791 // CCG012123 // CCG011539 // CCG014856 // CCG009010 // CCG018293 // CCG018366 // CCG003044 // CCG022911 // CCG008…
GO:0051213	F	dioxygenase activity	100	9153	198	23397	0.00079	0.062	// CCG026636 // CCG020054 // CCG025608 // CCG009345 // CCG012123 // CCG025606 // CCG025605 // CCG025604 // CCG000551 // CCG013320 // CCG026750 // CCG026751 // CCG026754 // CCG026755 // CCG024429 // CCG027496 // CCG018366 // CCG018367 // CCG016902 // CCG016901 // CCG027837 // CCG017493 // CCG029286 // CCG007392 // CCG013081 // CCG026446 // CCG015906 // CCG019068 // CCG024591 // CCG009439 // CCG019…
GO:0016740	F	transferase activity	2224	9153	5369	23397	0.001	0.077	// CCG010249 // CCG010245 // CCG010243 // CCG022760 // CCG018180 // CCG005411 // CCG005417 // CCG014174 // CCG010888 // CCG007492 // CCG007493 // CCG007496 // CCG007495 // CCG012821 // CCG014610 // CCG015748 // CCG015740 // CCG005733 // CCG013512 // CCG020921 // CCG020922 // CCG017986 // CCG020929 // CCG017983 // CCG000945 // CCG026423 // CCG026392 // CCG026937 // CCG016588 // CCG016586 // CCG016…
GO:0016298	F	lipase activity	62	9153	116	23397	0.0013	0.096	// CCG023142 // CCG012728 // CCG029378 // CCG007269 // CCG013944 // CCG009678 // CCG009676 // CCG022576 // CCG018470 // CCG018471 // CCG014779 // CCG009677 // CCG005924 // CCG008477 // CCG023931 // CCG004875 // CCG015670 // CCG019841 // CCG029421 // CCG013270 // CCG008127 // CCG000510 // CCG009042 // CCG014171 // CCG014170 // CCG003288 // CCG028815 // CCG007691 // CCG007692 // CCG004874 // CCG010…
GO:0004645	F	phosphorylase activity	7	9153	7	23397	0.0014	0.1	// CCG020718 // CCG013913 // CCG006951 // CCG028033 // CCG021264 // CCG009261 // CCG028032
GO:0047215	F	indole-3-acetate beta-glucosyltransferase activity	9	9153	10	23397	0.0014	0.1	// CCG024397 // CCG024399 // CCG024402 // CCG024403 // CCG024400 // CCG024401 // CCG024404 // CCG024405 // CCG019329
GO:0016229	F	steroid dehydrogenase activity	32	9153	53	23397	0.0014	0.1	// CCG024890 // CCG008009 // CCG006644 // CCG004975 // CCG006643 // CCG016936 // CCG010807 // CCG013545 // CCG013544 // CCG013546 // CCG018973 // CCG009297 // CCG018508 // CCG018509 // CCG007252 // CCG008007 // CCG023447 // CCG010957 // CCG010959 // CCG010958 // CCG000247 // CCG028559 // CCG006636 // CCG009942 // CCG015436 // CCG015272 // CCG015274 // CCG008008 // CCG029661 // CCG006638 // CCG017…
GO:0005506	F	iron ion binding	216	9153	469	23397	0.0015	0.11	// CCG025129 // CCG001423 // CCG025722 // CCG028164 // CCG018478 // CCG014777 // CCG015201 // CCG008276 // CCG013505 // CCG013504 // CCG013506 // CCG027010 // CCG011603 // CCG006434 // CCG027828 // CCG028448 // CCG012061 // CCG012060 // CCG012062 // CCG013096 // CCG013095 // CCG013094 // CCG028446 // CCG028447 // CCG028444 // CCG029583 // CCG015547 // CCG008814 // CCG024958 // CCG006687 // CCG002…
GO:0008092	F	cytoskeletal protein binding	113	9153	231	23397	0.0016	0.12	// CCG026522 // CCG017907 // CCG015041 // CCG019212 // CCG019211 // CCG022733 // CCG023528 // CCG013150 // CCG013015 // CCG027989 // CCG015365 // CCG007284 // CCG006431 // CCG028291 // CCG029460 // CCG002507 // CCG001745 // CCG021822 // CCG009742 // CCG029617 // CCG004127 // CCG018561 // CCG006893 // CCG004960 // CCG025481 // CCG005541 // CCG013086 // CCG016307 // CCG004527 // CCG028473 // CCG006…
GO:0016773	F	phosphotransferase activity, alcohol group as acceptor	774	9153	1815	23397	0.0017	0.12	// CCG010162 // CCG010249 // CCG020347 // CCG019272 // CCG023938 // CCG020226 // CCG018773 // CCG017622 // CCG018772 // CCG011808 // CCG022731 // CCG004051 // CCG003320 // CCG014174 // CCG011804 // CCG022798 // CCG004710 // CCG007492 // CCG007493 // CCG022793 // CCG007496 // CCG003991 // CCG007495 // CCG014049 // CCG008811 // CCG003267 // CCG010015 // CCG008250 // CCG013293 // CCG014610 // CCG015…
GO:0004620	F	phospholipase activity	42	9153	75	23397	0.0023	0.16	// CCG023142 // CCG012728 // CCG007269 // CCG013944 // CCG018470 // CCG018471 // CCG014779 // CCG028892 // CCG008477 // CCG023931 // CCG004875 // CCG015670 // CCG019841 // CCG029421 // CCG013270 // CCG004617 // CCG009042 // CCG014171 // CCG014170 // CCG003288 // CCG004874 // CCG027635 // CCG020443 // CCG026609 // CCG028893 // CCG025734 // CCG000172 // CCG023077 // CCG022160 // CCG022066 // CCG028…
GO:0016722	F	oxidoreductase activity, oxidizing metal ions	38	9153	67	23397	0.0027	0.18	// CCG027144 // CCG004938 // CCG029233 // CCG025685 // CCG010482 // CCG026178 // CCG025688 // CCG026210 // CCG000675 // CCG001199 // CCG015101 // CCG016829 // CCG004220 // CCG025686 // CCG000431 // CCG010470 // CCG020915 // CCG006940 // CCG001313 // CCG014319 // CCG026285 // CCG014320 // CCG018238 // CCG018237 // CCG009703 // CCG015761 // CCG008616 // CCG016085 // CCG004937 // CCG028597 // CCG014…
GO:0016709	F	oxidoreductase activity, acting on paired donors, with incorporation or reduction of molecular oxygen, NAD(P)H as one donor, and incorporation of one atom of oxygen	126	9153	264	23397	0.0029	0.2	// CCG025129 // CCG006039 // CCG028164 // CCG015201 // CCG011603 // CCG006434 // CCG012061 // CCG012060 // CCG012062 // CCG028692 // CCG013095 // CCG013094 // CCG029773 // CCG028444 // CCG029583 // CCG015547 // CCG008814 // CCG006687 // CCG023091 // CCG023092 // CCG023093 // CCG017654 // CCG008893 // CCG017653 // CCG002625 // CCG008662 // CCG024853 // CCG016303 // CCG004523 // CCG014039 // CCG008…
GO:0015098	F	molybdate ion transmembrane transporter activity	11	9153	14	23397	0.0032	0.21	// CCG001931 // CCG020455 // CCG013873 // CCG013369 // CCG013878 // CCG022635 // CCG022634 // CCG018288 // CCG027266 // CCG008983 // CCG027939
GO:0050505	F	hydroquinone glucosyltransferase activity	8	9153	9	23397	0.0032	0.21	// CCG010485 // CCG010483 // CCG018863 // CCG018862 // CCG018861 // CCG018864 // CCG018643 // CCG018642
GO:0022857	F	transmembrane transporter activity	654	9153	1535	23397	0.0038	0.25	// CCG027648 // CCG024993 // CCG018326 // CCG000650 // CCG016711 // CCG016710 // CCG004245 // CCG012311 // CCG005413 // CCG010093 // CCG013952 // CCG028052 // CCG005228 // CCG005227 // CCG005220 // CCG028178 // CCG028179 // CCG029481 // CCG004412 // CCG029482 // CCG024421 // CCG009427 // CCG028177 // CCG002914 // CCG020044 // CCG015074 // CCG020043 // CCG014613 // CCG024349 // CCG022165 // CCG004…
GO:0004674	F	protein serine/threonine kinase activity	551	9153	1288	23397	0.005	0.32	// CCG010162 // CCG010249 // CCG020347 // CCG019272 // CCG023938 // CCG020226 // CCG018773 // CCG017622 // CCG018772 // CCG011808 // CCG022731 // CCG004051 // CCG014174 // CCG011804 // CCG022798 // CCG022793 // CCG003991 // CCG022797 // CCG010015 // CCG013293 // CCG014610 // CCG015748 // CCG023964 // CCG029372 // CCG012982 // CCG027906 // CCG016472 // CCG018924 // CCG000945 // CCG026788 // CCG027…
GO:0042285	F	xylosyltransferase activity	14	9153	20	23397	0.0051	0.33	// CCG029057 // CCG006286 // CCG020294 // CCG018955 // CCG006328 // CCG001836 // CCG001837 // CCG000351 // CCG026727 // CCG026490 // CCG029580 // CCG025268 // CCG004468 // CCG019760
GO:0008574	F	ATP-dependent microtubule motor activity, plus-end-directed	16	9153	24	23397	0.0059	0.37	// CCG001305 // CCG013015 // CCG017645 // CCG027205 // CCG026522 // CCG001853 // CCG023890 // CCG014198 // CCG020301 // CCG023528 // CCG019434 // CCG018269 // CCG018561 // CCG002427 // CCG021822 // CCG019826
GO:0016857	F	racemase and epimerase activity, acting on carbohydrates and derivatives	20	9153	32	23397	0.0063	0.39	// CCG005292 // CCG005293 // CCG029420 // CCG005209 // CCG015492 // CCG013446 // CCG010497 // CCG011313 // CCG006254 // CCG009634 // CCG009705 // CCG015066 // CCG005004 // CCG009635 // CCG015490 // CCG005291 // CCG000038 // CCG002389 // CCG017432 // CCG000219
GO:0001046	F	core promoter sequence-specific DNA binding	20	9153	32	23397	0.0063	0.39	// CCG011606 // CCG000934 // CCG005647 // CCG026110 // CCG008414 // CCG016014 // CCG002824 // CCG025561 // CCG009227 // CCG016634 // CCG003866 // CCG005608 // CCG005163 // CCG010214 // CCG010215 // CCG027290 // CCG011536 // CCG007026 // CCG005287 // CCG010213
GO:0005432	F	calcium:sodium antiporter activity	10	9153	13	23397	0.0065	0.4	// CCG028584 // CCG028583 // CCG028581 // CCG028877 // CCG026632 // CCG009018 // CCG028868 // CCG028870 // CCG016379 // CCG009016
GO:0008146	F	sulfotransferase activity	11	9153	15	23397	0.0077	0.47	// CCG020221 // CCG027399 // CCG010123 // CCG001488 // CCG012052 // CCG020220 // CCG027431 // CCG000099 // CCG027398 // CCG027397 // CCG027396
GO:0001067	F	regulatory region nucleic acid binding	178	9153	394	23397	0.0088	0.52	// CCG013954 // CCG013955 // CCG025717 // CCG001430 // CCG015283 // CCG026635 // CCG009227 // CCG013666 // CCG002199 // CCG012589 // CCG014609 // CCG004227 // CCG003853 // CCG002874 // CCG004057 // CCG027532 // CCG011606 // CCG011976 // CCG016014 // CCG019293 // CCG007047 // CCG007963 // CCG021360 // CCG012793 // CCG010767 // CCG011363 // CCG004693 // CCG021824 // CCG004694 // CCG004697 // CCG000…
GO:0000975	F	regulatory region DNA binding	178	9153	394	23397	0.0088	0.52	// CCG013954 // CCG013955 // CCG025717 // CCG001430 // CCG015283 // CCG026635 // CCG009227 // CCG013666 // CCG002199 // CCG012589 // CCG014609 // CCG004227 // CCG003853 // CCG002874 // CCG004057 // CCG027532 // CCG011606 // CCG011976 // CCG016014 // CCG019293 // CCG007047 // CCG007963 // CCG021360 // CCG012793 // CCG010767 // CCG011363 // CCG004693 // CCG021824 // CCG004694 // CCG004697 // CCG000…
GO:0044212	F	transcription regulatory region DNA binding	178	9153	394	23397	0.0088	0.52	// CCG013954 // CCG013955 // CCG025717 // CCG001430 // CCG015283 // CCG026635 // CCG009227 // CCG013666 // CCG002199 // CCG012589 // CCG014609 // CCG004227 // CCG003853 // CCG002874 // CCG004057 // CCG027532 // CCG011606 // CCG011976 // CCG016014 // CCG019293 // CCG007047 // CCG007963 // CCG021360 // CCG012793 // CCG010767 // CCG011363 // CCG004693 // CCG021824 // CCG004694 // CCG004697 // CCG000…
GO:0008083	F	growth factor activity	5	9153	5	23397	0.0092	0.53	// CCG017538 // CCG007265 // CCG008835 // CCG027371 // CCG008153
GO:0045552	F	dihydrokaempferol 4-reductase activity	13	9153	19	23397	0.0094	0.54	// CCG000218 // CCG016978 // CCG006636 // CCG006638 // CCG025334 // CCG006644 // CCG027277 // CCG010957 // CCG018973 // CCG006643 // CCG017431 // CCG010959 // CCG010958
GO:0003677	F	DNA binding	903	9153	2164	23397	0.0095	0.54	// CCG010166 // CCG025717 // CCG021211 // CCG015669 // CCG020343 // CCG002199 // CCG013955 // CCG000659 // CCG014771 // CCG002874 // CCG029504 // CCG029506 // CCG012310 // CCG012103 // CCG001158 // CCG019663 // CCG006436 // CCG003324 // CCG003441 // CCG010888 // CCG027638 // CCG001575 // CCG010767 // CCG011363 // CCG027637 // CCG011367 // CCG028694 // CCG024428 // CCG006025 // CCG009747 // CCG013…
GO:0015171	F	amino acid transmembrane transporter activity	65	9153	131	23397	0.0096	0.54	// CCG002127 // CCG027109 // CCG026815 // CCG012792 // CCG020073 // CCG024142 // CCG014464 // CCG002128 // CCG019046 // CCG009522 // CCG001194 // CCG019849 // CCG007650 // CCG007651 // CCG006565 // CCG027698 // CCG016567 // CCG004242 // CCG007729 // CCG021654 // CCG009234 // CCG003069 // CCG009593 // CCG019072 // CCG024421 // CCG002117 // CCG009070 // CCG003064 // CCG010139 // CCG028178 // CCG028…
GO:0016634	F	oxidoreductase activity, acting on the CH-CH group of donors, oxygen as acceptor	22	9153	37	23397	0.0098	0.54	// CCG014319 // CCG014318 // CCG013506 // CCG008319 // CCG000169 // CCG013267 // CCG004918 // CCG013505 // CCG013504 // CCG026340 // CCG028448 // CCG024927 // CCG028446 // CCG001426 // CCG014320 // CCG001423 // CCG018236 // CCG007723 // CCG021008 // CCG028918 // CCG010148 // CCG028450
GO:0016707	F	gibberellin 3-beta-dioxygenase activity	14	9153	21	23397	0.0099	0.54	// CCG026084 // CCG003044 // CCG002155 // CCG027837 // CCG018366 // CCG000551 // CCG001568 // CCG018294 // CCG026446 // CCG011539 // CCG018302 // CCG018293 // CCG017478 // CCG024643
GO:1901682	F	sulfur compound transmembrane transporter activity	21	9153	35	23397	0.01	0.54	// CCG027670 // CCG009640 // CCG004366 // CCG004934 // CCG006403 // CCG003001 // CCG005539 // CCG004245 // CCG019873 // CCG006402 // CCG020044 // CCG019713 // CCG020043 // CCG013172 // CCG024142 // CCG005047 // CCG005046 // CCG004933 // CCG029206 // CCG012596 // CCG007857
GO:0005372	F	water transmembrane transporter activity	17	9153	27	23397	0.01	0.54	// CCG016641 // CCG024664 // CCG028197 // CCG025684 // CCG009427 // CCG007828 // CCG014488 // CCG016734 // CCG008651 // CCG012408 // CCG006749 // CCG001260 // CCG024349 // CCG026737 // CCG021666 // CCG016098 // CCG013292
GO:0015250	F	water channel activity	17	9153	27	23397	0.01	0.54	// CCG016641 // CCG024664 // CCG028197 // CCG025684 // CCG009427 // CCG007828 // CCG014488 // CCG016734 // CCG008651 // CCG012408 // CCG006749 // CCG001260 // CCG024349 // CCG026737 // CCG021666 // CCG016098 // CCG013292
GO:0016679	F	oxidoreductase activity, acting on diphenols and related substances as donors	43	9153	82	23397	0.01	0.54	// CCG007548 // CCG004938 // CCG025686 // CCG025685 // CCG010482 // CCG026178 // CCG025688 // CCG010481 // CCG016918 // CCG000675 // CCG001199 // CCG015101 // CCG016829 // CCG010478 // CCG000431 // CCG010470 // CCG010471 // CCG006940 // CCG028671 // CCG024194 // CCG026285 // CCG018238 // CCG018237 // CCG009703 // CCG026288 // CCG014476 // CCG001310 // CCG016085 // CCG004937 // CCG020005 // CCG001…
GO:0001047	F	core promoter binding	20	9153	33	23397	0.01	0.54	// CCG011606 // CCG000934 // CCG005647 // CCG026110 // CCG008414 // CCG016014 // CCG002824 // CCG025561 // CCG009227 // CCG016634 // CCG003866 // CCG005608 // CCG005163 // CCG010214 // CCG010215 // CCG027290 // CCG011536 // CCG007026 // CCG005287 // CCG010213
GO:0016899	F	oxidoreductase activity, acting on the CH-OH group of donors, oxygen as acceptor	19	9153	31	23397	0.01	0.54	// CCG016990 // CCG003683 // CCG009418 // CCG012574 // CCG014452 // CCG012962 // CCG002430 // CCG007175 // CCG021733 // CCG027910 // CCG003419 // CCG014449 // CCG026724 // CCG013974 // CCG015674 // CCG013976 // CCG014455 // CCG003755 // CCG003754
GO:0003885	F	D-arabinono-1,4-lactone oxidase activity	8	9153	10	23397	0.011	0.54	// CCG016990 // CCG012574 // CCG007175 // CCG021733 // CCG027910 // CCG013974 // CCG026724 // CCG013976
GO:0004130	F	cytochrome-c peroxidase activity	8	9153	10	23397	0.011	0.54	// CCG029398 // CCG028828 // CCG013938 // CCG012178 // CCG012177 // CCG009931 // CCG012175 // CCG012180
GO:0016772	F	transferase activity, transferring phosphorus-containing groups	1040	9153	2508	23397	0.012	0.6	// CCG016409 // CCG010162 // CCG021211 // CCG010249 // CCG013585 // CCG020347 // CCG010243 // CCG023938 // CCG020226 // CCG018773 // CCG017622 // CCG007060 // CCG002876 // CCG018772 // CCG029504 // CCG011808 // CCG022731 // CCG004051 // CCG003320 // CCG012319 // CCG014174 // CCG011804 // CCG022798 // CCG010761 // CCG007492 // CCG007493 // CCG022793 // CCG007496 // CCG003991 // CCG007495 // CCG014…
GO:0022804	F	active transmembrane transporter activity	271	9153	620	23397	0.012	0.6	// CCG016710 // CCG026524 // CCG008438 // CCG001636 // CCG027939 // CCG008184 // CCG008437 // CCG026632 // CCG010448 // CCG000650 // CCG023733 // CCG024434 // CCG024433 // CCG002905 // CCG019768 // CCG009619 // CCG024438 // CCG009915 // CCG009914 // CCG006949 // CCG005413 // CCG011750 // CCG028133 // CCG029349 // CCG029676 // CCG029677 // CCG010078 // CCG010079 // CCG005228 // CCG005227 // CCG010…
GO:0016872	F	intramolecular lyase activity	9	9153	12	23397	0.013	0.65	// CCG001592 // CCG005566 // CCG003821 // CCG005567 // CCG013498 // CCG004930 // CCG020979 // CCG011506 // CCG028926
GO:0052716	F	hydroquinone:oxygen oxidoreductase activity	24	9153	42	23397	0.014	0.68	// CCG010481 // CCG010482 // CCG026178 // CCG000675 // CCG010478 // CCG010470 // CCG010471 // CCG006940 // CCG026285 // CCG018238 // CCG018237 // CCG009703 // CCG026288 // CCG014476 // CCG016085 // CCG007548 // CCG001313 // CCG001310 // CCG002555 // CCG026210 // CCG002538 // CCG002536 // CCG002537 // CCG017514
GO:0047044	F	androstan-3-alpha,17-beta-diol dehydrogenase activity	10	9153	14	23397	0.015	0.72	// CCG018508 // CCG018509 // CCG008007 // CCG008008 // CCG008009 // CCG015272 // CCG015274 // CCG023447 // CCG016936 // CCG018494
GO:0004697	F	protein kinase C activity	10	9153	14	23397	0.015	0.72	// CCG009964 // CCG028400 // CCG024802 // CCG006171 // CCG009772 // CCG017720 // CCG024980 // CCG006169 // CCG027034 // CCG028399
GO:0045486	F	naringenin 3-dioxygenase activity	11	9153	16	23397	0.016	0.77	// CCG012130 // CCG012128 // CCG012129 // CCG012124 // CCG012125 // CCG012126 // CCG012127 // CCG012123 // CCG012134 // CCG013321 // CCG013320
GO:0008081	F	phosphoric diester hydrolase activity	34	9153	64	23397	0.016	0.77	// CCG008477 // CCG011174 // CCG018247 // CCG018471 // CCG014779 // CCG000294 // CCG023474 // CCG023931 // CCG004875 // CCG004874 // CCG019841 // CCG029421 // CCG013270 // CCG004617 // CCG029541 // CCG003288 // CCG016012 // CCG003448 // CCG019451 // CCG013944 // CCG026609 // CCG015012 // CCG000172 // CCG027635 // CCG022160 // CCG022066 // CCG018470 // CCG002554 // CCG010344 // CCG029470 // CCG004…
GO:0016210	F	naringenin-chalcone synthase activity	6	9153	7	23397	0.017	0.77	// CCG023408 // CCG023407 // CCG023409 // CCG004331 // CCG018016 // CCG018015
GO:0016711	F	flavonoid 3'-monooxygenase activity	6	9153	7	23397	0.017	0.77	// CCG010919 // CCG004509 // CCG004508 // CCG002742 // CCG013355 // CCG007560
GO:0046577	F	long-chain-alcohol oxidase activity	6	9153	7	23397	0.017	0.77	// CCG003683 // CCG003419 // CCG012962 // CCG002430 // CCG003755 // CCG003754
GO:0050105	F	L-gulonolactone oxidase activity	6	9153	7	23397	0.017	0.77	// CCG016990 // CCG012574 // CCG007175 // CCG027910 // CCG013974 // CCG013976
GO:0016846	F	carbon-sulfur lyase activity	24	9153	43	23397	0.02	0.89	// CCG029037 // CCG013815 // CCG013813 // CCG012725 // CCG007108 // CCG005877 // CCG005875 // CCG005878 // CCG013356 // CCG007532 // CCG006199 // CCG019290 // CCG022877 // CCG022858 // CCG013823 // CCG013821 // CCG013824 // CCG025491 // CCG016451 // CCG008066 // CCG006595 // CCG012056 // CCG001045 // CCG029688
GO:0015103	F	inorganic anion transmembrane transporter activity	52	9153	105	23397	0.02	0.89	// CCG020455 // CCG010029 // CCG004934 // CCG006394 // CCG013878 // CCG004933 // CCG005128 // CCG023733 // CCG018288 // CCG024253 // CCG002928 // CCG002925 // CCG006524 // CCG008983 // CCG024501 // CCG024008 // CCG004366 // CCG013873 // CCG004245 // CCG023450 // CCG027266 // CCG005047 // CCG005046 // CCG022691 // CCG029206 // CCG010030 // CCG001931 // CCG003249 // CCG003001 // CCG019070 // CCG022…
GO:0016701	F	oxidoreductase activity, acting on single donors with incorporation of molecular oxygen	43	9153	85	23397	0.021	0.95	// CCG024591 // CCG026740 // CCG026636 // CCG023652 // CCG007367 // CCG020054 // CCG019023 // CCG006551 // CCG025606 // CCG025605 // CCG025604 // CCG025626 // CCG013081 // CCG010379 // CCG000214 // CCG004712 // CCG004139 // CCG026739 // CCG026750 // CCG026751 // CCG026754 // CCG026755 // CCG012927 // CCG000746 // CCG027496 // CCG024374 // CCG013825 // CCG009626 // CCG014768 // CCG019011 // CCG017…
GO:0000989	F	transcription factor activity, transcription factor binding	123	9153	271	23397	0.021	0.96	// CCG020343 // CCG024148 // CCG014609 // CCG003853 // CCG027532 // CCG019293 // CCG012552 // CCG007963 // CCG012793 // CCG004693 // CCG021824 // CCG004694 // CCG004697 // CCG018070 // CCG002353 // CCG019727 // CCG026384 // CCG008227 // CCG016450 // CCG027831 // CCG014163 // CCG017716 // CCG006346 // CCG004723 // CCG026338 // CCG026339 // CCG014696 // CCG022748 // CCG027140 // CCG028301 // CCG009…
GO:0030158	F	protein xylosyltransferase activity	7	9153	9	23397	0.022	0.98	// CCG006286 // CCG018955 // CCG001836 // CCG001837 // CCG025268 // CCG004468 // CCG019760
GO:0016688	F	L-ascorbate peroxidase activity	8	9153	11	23397	0.025	1	// CCG029399 // CCG029398 // CCG028828 // CCG013938 // CCG012178 // CCG012177 // CCG012175 // CCG012180
GO:0004767	F	sphingomyelin phosphodiesterase activity	8	9153	11	23397	0.025	1	// CCG026609 // CCG002554 // CCG003288 // CCG014779 // CCG000172 // CCG027635 // CCG021815 // CCG019841
GO:1990939	F	ATP-dependent microtubule motor activity	16	9153	27	23397	0.027	1	// CCG001305 // CCG013015 // CCG017645 // CCG027205 // CCG026522 // CCG001853 // CCG023890 // CCG014198 // CCG020301 // CCG023528 // CCG019434 // CCG018269 // CCG018561 // CCG002427 // CCG021822 // CCG019826
GO:0001228	F	transcriptional activator activity, RNA polymerase II transcription regulatory region sequence-specific binding	29	9153	55	23397	0.028	1	// CCG026767 // CCG008414 // CCG000822 // CCG006114 // CCG016634 // CCG005608 // CCG027290 // CCG013289 // CCG007026 // CCG011606 // CCG026110 // CCG005287 // CCG025561 // CCG016014 // CCG001488 // CCG010214 // CCG010215 // CCG011240 // CCG010213 // CCG000934 // CCG009227 // CCG013290 // CCG003866 // CCG005939 // CCG020003 // CCG028607 // CCG002824 // CCG024621 // CCG029454
GO:0050616	F	secologanin synthase activity	9	9153	13	23397	0.028	1	// CCG026340 // CCG028918 // CCG028448 // CCG007723 // CCG010148 // CCG024927 // CCG021008 // CCG028450 // CCG028446
GO:0035252	F	UDP-xylosyltransferase activity	9	9153	13	23397	0.028	1	// CCG029057 // CCG006286 // CCG018955 // CCG001836 // CCG001837 // CCG026490 // CCG025268 // CCG004468 // CCG019760
GO:0050321	F	tau-protein kinase activity	9	9153	13	23397	0.028	1	// CCG009319 // CCG013037 // CCG024809 // CCG009661 // CCG005161 // CCG017722 // CCG017622 // CCG002935 // CCG020998
GO:0050664	F	oxidoreductase activity, acting on NAD(P)H, oxygen as acceptor	12	9153	19	23397	0.029	1	// CCG009887 // CCG001307 // CCG014250 // CCG015761 // CCG000721 // CCG009716 // CCG009715 // CCG015760 // CCG003456 // CCG017883 // CCG026402 // CCG009719
GO:0031409	F	pigment binding	10	9153	15	23397	0.029	1	// CCG022028 // CCG022029 // CCG006442 // CCG022027 // CCG001076 // CCG029303 // CCG025834 // CCG020036 // CCG028864 // CCG011362
GO:0008447	F	L-ascorbate oxidase activity	13	9153	21	23397	0.029	1	// CCG024384 // CCG004937 // CCG016829 // CCG025686 // CCG025685 // CCG004938 // CCG025688 // CCG001199 // CCG016241 // CCG016240 // CCG015101 // CCG000431 // CCG024194
GO:0047911	F	galacturan 1,4-alpha-galacturonidase activity	12	9153	19	23397	0.029	1	// CCG011067 // CCG013202 // CCG013203 // CCG011068 // CCG023731 // CCG002907 // CCG010968 // CCG024001 // CCG006208 // CCG002934 // CCG013179 // CCG020329
GO:0005544	F	calcium-dependent phospholipid binding	10	9153	15	23397	0.029	1	// CCG022070 // CCG006707 // CCG029617 // CCG022202 // CCG022203 // CCG022201 // CCG022206 // CCG022204 // CCG022205 // CCG017747
GO:0000988	F	transcription factor activity, protein binding	126	9153	282	23397	0.034	1	// CCG020343 // CCG024148 // CCG014609 // CCG003853 // CCG027532 // CCG002733 // CCG019293 // CCG012552 // CCG007963 // CCG012793 // CCG004693 // CCG021824 // CCG004694 // CCG004697 // CCG018070 // CCG002353 // CCG019727 // CCG026384 // CCG008227 // CCG016450 // CCG027831 // CCG014163 // CCG017716 // CCG006346 // CCG004723 // CCG026338 // CCG026339 // CCG014696 // CCG022748 // CCG027140 // CCG028…
GO:0004650	F	polygalacturonase activity	25	9153	47	23397	0.035	1	// CCG024592 // CCG023731 // CCG007783 // CCG002907 // CCG010968 // CCG024001 // CCG002934 // CCG020329 // CCG007516 // CCG011067 // CCG013202 // CCG013203 // CCG011068 // CCG013179 // CCG006660 // CCG004756 // CCG026556 // CCG006208 // CCG008186 // CCG006659 // CCG011611 // CCG023823 // CCG005376 // CCG019784 // CCG019782
GO:0004351	F	glutamate decarboxylase activity	5	9153	6	23397	0.037	1	// CCG029628 // CCG004037 // CCG004038 // CCG011956 // CCG005848
GO:0047180	F	salutaridinol 7-O-acetyltransferase activity	15	9153	26	23397	0.043	1	// CCG011914 // CCG021229 // CCG013776 // CCG013229 // CCG000639 // CCG000638 // CCG013231 // CCG013230 // CCG011381 // CCG011382 // CCG011411 // CCG011413 // CCG010742 // CCG010741 // CCG006787
GO:0015116	F	sulfate transmembrane transporter activity	15	9153	26	23397	0.043	1	// CCG004366 // CCG004934 // CCG006403 // CCG003001 // CCG005539 // CCG004245 // CCG019873 // CCG006402 // CCG020044 // CCG020043 // CCG005047 // CCG005046 // CCG004933 // CCG029206 // CCG007857
GO:0005342	F	organic acid transmembrane transporter activity	72	9153	156	23397	0.044	1	// CCG002127 // CCG027109 // CCG026815 // CCG012792 // CCG020073 // CCG024142 // CCG014464 // CCG002128 // CCG019046 // CCG029795 // CCG009522 // CCG001194 // CCG019849 // CCG007650 // CCG007651 // CCG004366 // CCG006565 // CCG013377 // CCG027698 // CCG016567 // CCG004242 // CCG007729 // CCG021654 // CCG009234 // CCG003069 // CCG009593 // CCG019072 // CCG024421 // CCG002117 // CCG009070 // CCG007…
GO:0046943	F	carboxylic acid transmembrane transporter activity	72	9153	156	23397	0.044	1	// CCG002127 // CCG027109 // CCG026815 // CCG012792 // CCG020073 // CCG024142 // CCG014464 // CCG002128 // CCG019046 // CCG029795 // CCG009522 // CCG001194 // CCG019849 // CCG007650 // CCG007651 // CCG004366 // CCG006565 // CCG013377 // CCG027698 // CCG016567 // CCG004242 // CCG007729 // CCG021654 // CCG009234 // CCG003069 // CCG009593 // CCG019072 // CCG024421 // CCG002117 // CCG009070 // CCG007…
GO:0047938	F	glucose-6-phosphate 1-epimerase activity	6	9153	8	23397	0.045	1	// CCG010497 // CCG009634 // CCG009705 // CCG009635 // CCG005209 // CCG002389
GO:0004557	F	alpha-galactosidase activity	6	9153	8	23397	0.045	1	// CCG025101 // CCG005095 // CCG015335 // CCG028494 // CCG020970 // CCG015337
GO:0052692	F	raffinose alpha-galactosidase activity	6	9153	8	23397	0.045	1	// CCG025101 // CCG005095 // CCG015335 // CCG028494 // CCG020970 // CCG015337
GO:0015203	F	polyamine transmembrane transporter activity	6	9153	8	23397	0.045	1	// CCG006565 // CCG011310 // CCG009519 // CCG009522 // CCG022666 // CCG022667
GO:0008271	F	secondary active sulfate transmembrane transporter activity	13	9153	22	23397	0.046	1	// CCG004934 // CCG006403 // CCG003001 // CCG005539 // CCG004245 // CCG019873 // CCG006402 // CCG020044 // CCG020043 // CCG005047 // CCG005046 // CCG004933 // CCG029206
GO:0004857	F	enzyme inhibitor activity	62	9153	133	23397	0.048	1	// CCG022404 // CCG027448 // CCG026394 // CCG015406 // CCG029179 // CCG029178 // CCG019828 // CCG019829 // CCG009184 // CCG021378 // CCG007470 // CCG015488 // CCG015489 // CCG021682 // CCG000006 // CCG021680 // CCG027824 // CCG025087 // CCG024409 // CCG027450 // CCG000513 // CCG014406 // CCG008880 // CCG003401 // CCG026203 // CCG012089 // CCG024198 // CCG019833 // CCG017462 // CCG021681 // CCG021…
GO:0016157	F	sucrose synthase activity	7	9153	10	23397	0.049	1	// CCG005832 // CCG007505 // CCG000294 // CCG006496 // CCG000059 // CCG004236 // CCG026407
GO:0008519	F	ammonium transmembrane transporter activity	11	9153	18	23397	0.049	1	// CCG012528 // CCG005517 // CCG027981 // CCG029254 // CCG009941 // CCG005518 // CCG012438 // CCG008460 // CCG029253 // CCG014860 // CCG008458
GO:0008378	F	galactosyltransferase activity	24	9153	46	23397	0.05	1	// CCG005983 // CCG011817 // CCG010780 // CCG014425 // CCG005661 // CCG004201 // CCG000457 // CCG019296 // CCG008012 // CCG023133 // CCG027195 // CCG003710 // CCG011533 // CCG027111 // CCG022444 // CCG023722 // CCG028495 // CCG023728 // CCG012785 // CCG002286 // CCG024491 // CCG026672 // CCG010994 // CCG010993
GO:0015298	F	solute:cation antiporter activity	32	9153	64	23397	0.05	1	// CCG003497 // CCG001636 // CCG026914 // CCG026632 // CCG025252 // CCG025253 // CCG028870 // CCG028877 // CCG009018 // CCG028584 // CCG028583 // CCG028581 // CCG028406 // CCG020937 // CCG028394 // CCG005228 // CCG005227 // CCG003145 // CCG016379 // CCG028145 // CCG012001 // CCG009112 // CCG002273 // CCG027771 // CCG022442 // CCG012710 // CCG021415 // CCG028868 // CCG022009 // CCG029298 // CCG009…
GO:0015925	F	galactosidase activity	19	9153	35	23397	0.05	1	// CCG004636 // CCG015337 // CCG027312 // CCG001431 // CCG000913 // CCG015335 // CCG012695 // CCG026607 // CCG005095 // CCG012697 // CCG004623 // CCG003873 // CCG003074 // CCG028494 // CCG012391 // CCG012390 // CCG020970 // CCG003072 // CCG025101
GO:0071944	C	cell periphery	1106	9153	2316	23397	5.7e-16	1.1e-12	// CCG007828 // CCG010162 // CCG016476 // CCG010249 // CCG020344 // CCG027642 // CCG002349 // CCG014779 // CCG007199 // CCG007501 // CCG014773 // CCG018773 // CCG013411 // CCG025686 // CCG012311 // CCG005413 // CCG012317 // CCG010556 // CCG005419 // CCG012319 // CCG003288 // CCG014174 // CCG008141 // CCG004058 // CCG022798 // CCG010761 // CCG010767 // CCG027635 // CCG011361 // CCG005222 // CCG003…
GO:0005576	C	extracellular region	354	9153	670	23397	1e-12	9.5e-10	// CCG027642 // CCG000125 // CCG000124 // CCG014853 // CCG005419 // CCG014175 // CCG010555 // CCG004058 // CCG005229 // CCG011361 // CCG013802 // CCG009031 // CCG013804 // CCG007912 // CCG017913 // CCG006659 // CCG007751 // CCG026236 // CCG013891 // CCG026417 // CCG010940 // CCG009083 // CCG011067 // CCG013202 // CCG013203 // CCG011068 // CCG024198 // CCG026301 // CCG024197 // CCG011089 // CCG011…
GO:0005886	C	plasma membrane	902	9153	1915	23397	5.8e-12	3.6e-09	// CCG007828 // CCG010162 // CCG010249 // CCG020344 // CCG002349 // CCG014779 // CCG007199 // CCG013412 // CCG014773 // CCG018773 // CCG013411 // CCG018772 // CCG012311 // CCG005413 // CCG012317 // CCG002491 // CCG012319 // CCG007284 // CCG014174 // CCG008141 // CCG022798 // CCG010761 // CCG010767 // CCG027635 // CCG005222 // CCG003991 // CCG027633 // CCG010018 // CCG010019 // CCG029481 // CCG003…
GO:0031225	C	anchored component of membrane	93	9153	139	23397	3.8e-11	1.8e-08	// CCG008530 // CCG010002 // CCG009343 // CCG009344 // CCG028633 // CCG014773 // CCG016913 // CCG016652 // CCG012317 // CCG027822 // CCG015987 // CCG026433 // CCG010492 // CCG013751 // CCG025755 // CCG023646 // CCG017349 // CCG014611 // CCG017656 // CCG002183 // CCG028049 // CCG011770 // CCG004256 // CCG007204 // CCG017412 // CCG026422 // CCG025803 // CCG006113 // CCG005961 // CCG020075 // CCG018…
GO:0046658	C	anchored component of plasma membrane	73	9153	105	23397	3.1e-10	1.2e-07	// CCG026422 // CCG003252 // CCG009923 // CCG008530 // CCG025803 // CCG001823 // CCG010002 // CCG005961 // CCG018247 // CCG005705 // CCG005166 // CCG009343 // CCG009344 // CCG027841 // CCG020710 // CCG004837 // CCG016913 // CCG023945 // CCG017485 // CCG016652 // CCG013370 // CCG000431 // CCG003349 // CCG002183 // CCG021897 // CCG028633 // CCG009367 // CCG025828 // CCG011453 // CCG023116 // CCG028…
GO:0031226	C	intrinsic component of plasma membrane	179	9153	322	23397	2.2e-09	6.9e-07	// CCG008530 // CCG025684 // CCG021666 // CCG020458 // CCG010002 // CCG024349 // CCG023733 // CCG009343 // CCG009344 // CCG027841 // CCG019768 // CCG016913 // CCG020751 // CCG016098 // CCG016652 // CCG012311 // CCG028197 // CCG012317 // CCG027981 // CCG010761 // CCG010078 // CCG010079 // CCG012254 // CCG010075 // CCG010076 // CCG001644 // CCG026433 // CCG024384 // CCG025755 // CCG009427 // CCG023…
GO:0009505	C	plant-type cell wall	73	9153	113	23397	4.2e-08	1.1e-05	// CCG013533 // CCG016829 // CCG025686 // CCG025685 // CCG027642 // CCG009430 // CCG028700 // CCG015558 // CCG003129 // CCG001199 // CCG025101 // CCG014370 // CCG008680 // CCG016959 // CCG025688 // CCG022173 // CCG019398 // CCG019399 // CCG012871 // CCG006196 // CCG002580 // CCG005419 // CCG026367 // CCG019397 // CCG027840 // CCG009875 // CCG010314 // CCG020408 // CCG013963 // CCG028385 // CCG020…
GO:0031224	C	intrinsic component of membrane	3659	9153	8646	23397	1.2e-07	2.8e-05	// CCG028938 // CCG012914 // CCG010243 // CCG022760 // CCG014773 // CCG014771 // CCG004115 // CCG014777 // CCG008131 // CCG010649 // CCG000124 // CCG000123 // CCG005417 // CCG005419 // CCG014174 // CCG010644 // CCG022420 // CCG010884 // CCG003779 // CCG027442 // CCG009427 // CCG011268 // CCG009420 // CCG022169 // CCG022168 // CCG014610 // CCG014611 // CCG014613 // CCG022163 // CCG022162 // CCG022…
GO:0016021	C	integral component of membrane	3638	9153	8607	23397	1.9e-07	4e-05	// CCG028938 // CCG012914 // CCG010243 // CCG022760 // CCG014773 // CCG014771 // CCG004115 // CCG014777 // CCG008131 // CCG010649 // CCG000124 // CCG000123 // CCG005417 // CCG005419 // CCG014174 // CCG010644 // CCG022420 // CCG010884 // CCG003779 // CCG027442 // CCG009427 // CCG011268 // CCG009420 // CCG022169 // CCG022168 // CCG014610 // CCG014611 // CCG014613 // CCG022163 // CCG022162 // CCG022…
GO:0030312	C	external encapsulating structure	204	9153	393	23397	2.4e-07	4.1e-05	// CCG024805 // CCG025686 // CCG025685 // CCG001431 // CCG020344 // CCG027642 // CCG029179 // CCG004818 // CCG023985 // CCG015335 // CCG016441 // CCG010854 // CCG027824 // CCG022154 // CCG006544 // CCG012871 // CCG016391 // CCG010556 // CCG005419 // CCG027829 // CCG010555 // CCG004058 // CCG020955 // CCG012391 // CCG012390 // CCG009293 // CCG010552 // CCG022404 // CCG025688 // CCG022403 // CCG001…
GO:0005618	C	cell wall	204	9153	393	23397	2.4e-07	4.1e-05	// CCG024805 // CCG025686 // CCG025685 // CCG001431 // CCG020344 // CCG027642 // CCG029179 // CCG004818 // CCG023985 // CCG015335 // CCG016441 // CCG010854 // CCG027824 // CCG022154 // CCG006544 // CCG012871 // CCG016391 // CCG010556 // CCG005419 // CCG027829 // CCG010555 // CCG004058 // CCG020955 // CCG012391 // CCG012390 // CCG009293 // CCG010552 // CCG022404 // CCG025688 // CCG022403 // CCG001…
GO:0044459	C	plasma membrane part	204	9153	401	23397	1.5e-06	0.00023	// CCG008530 // CCG025684 // CCG020458 // CCG010002 // CCG007204 // CCG024349 // CCG023733 // CCG009343 // CCG009344 // CCG009345 // CCG019768 // CCG016913 // CCG020751 // CCG016098 // CCG016652 // CCG012311 // CCG028197 // CCG012317 // CCG020194 // CCG027981 // CCG010761 // CCG010078 // CCG010079 // CCG012254 // CCG010075 // CCG010076 // CCG001644 // CCG026433 // CCG024384 // CCG025755 // CCG009…
GO:0044425	C	membrane part	3705	9153	8928	23397	5e-05	0.0073	// CCG028938 // CCG012914 // CCG010243 // CCG022760 // CCG014773 // CCG014771 // CCG004115 // CCG014777 // CCG008131 // CCG010649 // CCG000124 // CCG000123 // CCG005417 // CCG005419 // CCG014174 // CCG010644 // CCG022420 // CCG010884 // CCG003779 // CCG027442 // CCG009427 // CCG011268 // CCG009420 // CCG022169 // CCG022168 // CCG014610 // CCG014611 // CCG014613 // CCG022163 // CCG022162 // CCG022…
GO:0005871	C	kinesin complex	34	9153	51	23397	6.5e-05	0.0087	// CCG000755 // CCG019434 // CCG001961 // CCG014198 // CCG000869 // CCG020301 // CCG022236 // CCG018269 // CCG017645 // CCG001305 // CCG013015 // CCG001549 // CCG002427 // CCG023793 // CCG027014 // CCG007519 // CCG027866 // CCG029460 // CCG002507 // CCG015033 // CCG003486 // CCG027205 // CCG005808 // CCG028314 // CCG004127 // CCG015668 // CCG022733 // CCG018561 // CCG004960 // CCG026408 // CCG013…
GO:0048046	C	apoplast	111	9153	214	23397	0.00011	0.014	// CCG018950 // CCG010481 // CCG004452 // CCG008825 // CCG016441 // CCG010478 // CCG022154 // CCG016391 // CCG010470 // CCG010471 // CCG000550 // CCG006940 // CCG027829 // CCG021847 // CCG004058 // CCG020955 // CCG005229 // CCG012147 // CCG013802 // CCG009031 // CCG013804 // CCG011735 // CCG007548 // CCG002183 // CCG010482 // CCG005230 // CCG017554 // CCG017555 // CCG017552 // CCG023899 // CCG012…
GO:0016020	C	membrane	4073	9153	9912	23397	0.00041	0.048	// CCG028938 // CCG010249 // CCG012914 // CCG010243 // CCG018470 // CCG018471 // CCG014779 // CCG022760 // CCG014773 // CCG014771 // CCG004115 // CCG014777 // CCG008131 // CCG010649 // CCG000124 // CCG000123 // CCG005417 // CCG005419 // CCG000396 // CCG014174 // CCG010644 // CCG028463 // CCG009377 // CCG022420 // CCG028931 // CCG010884 // CCG003779 // CCG027442 // CCG020965 // CCG009427 // CCG011…
GO:0005875	C	microtubule associated complex	44	9153	77	23397	0.0011	0.12	// CCG000755 // CCG026788 // CCG026522 // CCG015025 // CCG023890 // CCG001961 // CCG014198 // CCG000869 // CCG020301 // CCG018269 // CCG023528 // CCG017645 // CCG019826 // CCG001305 // CCG013015 // CCG001549 // CCG002427 // CCG023793 // CCG027014 // CCG007519 // CCG027866 // CCG029460 // CCG002507 // CCG025103 // CCG021822 // CCG015033 // CCG003486 // CCG027205 // CCG001853 // CCG005808 // CCG028…
GO:0009531	C	secondary cell wall	7	9153	7	23397	0.0014	0.13	// CCG019398 // CCG019399 // CCG003926 // CCG019397 // CCG019401 // CCG019400 // CCG004032
GO:0044420	C	extracellular matrix component	7	9153	7	23397	0.0014	0.13	// CCG019398 // CCG019399 // CCG003926 // CCG019397 // CCG019401 // CCG019400 // CCG004032
GO:0009519	C	middle lamella	7	9153	7	23397	0.0014	0.13	// CCG019398 // CCG019399 // CCG003926 // CCG019397 // CCG019401 // CCG019400 // CCG004032
GO:0099512	C	supramolecular fiber	64	9153	123	23397	0.0025	0.22	// CCG021259 // CCG026788 // CCG020738 // CCG022438 // CCG025802 // CCG005853 // CCG015025 // CCG000869 // CCG020301 // CCG022236 // CCG017907 // CCG007768 // CCG027866 // CCG024417 // CCG018269 // CCG019847 // CCG006603 // CCG026408 // CCG006545 // CCG020283 // CCG002790 // CCG001549 // CCG025103 // CCG026202 // CCG006431 // CCG016398 // CCG006964 // CCG028241 // CCG028291 // CCG029460 // CCG002…
GO:0099513	C	polymeric cytoskeletal fiber	64	9153	123	23397	0.0025	0.22	// CCG021259 // CCG026788 // CCG020738 // CCG022438 // CCG025802 // CCG005853 // CCG015025 // CCG000869 // CCG020301 // CCG022236 // CCG017907 // CCG007768 // CCG027866 // CCG024417 // CCG018269 // CCG019847 // CCG006603 // CCG026408 // CCG006545 // CCG020283 // CCG002790 // CCG001549 // CCG025103 // CCG026202 // CCG006431 // CCG016398 // CCG006964 // CCG028241 // CCG028291 // CCG029460 // CCG002…
GO:0005887	C	integral component of plasma membrane	105	9153	216	23397	0.003	0.24	// CCG025684 // CCG020458 // CCG024349 // CCG023733 // CCG019768 // CCG020751 // CCG016098 // CCG012311 // CCG028197 // CCG027981 // CCG010761 // CCG010078 // CCG010079 // CCG012254 // CCG010075 // CCG010076 // CCG001644 // CCG009427 // CCG019070 // CCG006106 // CCG020044 // CCG013292 // CCG020043 // CCG008651 // CCG022165 // CCG000035 // CCG001080 // CCG010082 // CCG021666 // CCG005869 // CCG022…
GO:0009522	C	photosystem I	21	9153	33	23397	0.0038	0.3	// CCG006082 // CCG022028 // CCG022029 // CCG006442 // CCG005510 // CCG008661 // CCG023656 // CCG012082 // CCG016714 // CCG022027 // CCG001076 // CCG028864 // CCG004757 // CCG025834 // CCG020036 // CCG002950 // CCG011362 // CCG019822 // CCG005916 // CCG029303 // CCG017199
GO:0031012	C	extracellular matrix	12	9153	16	23397	0.004	0.3	// CCG002183 // CCG019398 // CCG019399 // CCG003926 // CCG017920 // CCG019397 // CCG025003 // CCG011246 // CCG019401 // CCG008646 // CCG019400 // CCG004032
GO:0005874	C	microtubule	57	9153	111	23397	0.006	0.44	// CCG021259 // CCG026788 // CCG020738 // CCG022438 // CCG000755 // CCG005853 // CCG015025 // CCG000869 // CCG020301 // CCG022236 // CCG017907 // CCG007768 // CCG018269 // CCG019847 // CCG006603 // CCG026408 // CCG006545 // CCG020283 // CCG013399 // CCG001549 // CCG025103 // CCG026202 // CCG006431 // CCG016398 // CCG006964 // CCG028241 // CCG028291 // CCG027435 // CCG002507 // CCG017526 // CCG006…
GO:0015630	C	microtubule cytoskeleton	87	9153	181	23397	0.0091	0.62	// CCG026522 // CCG000755 // CCG017907 // CCG018269 // CCG006545 // CCG013399 // CCG002427 // CCG026202 // CCG006431 // CCG016398 // CCG028291 // CCG029460 // CCG002507 // CCG021822 // CCG027761 // CCG004127 // CCG018561 // CCG004960 // CCG015541 // CCG013086 // CCG016307 // CCG003199 // CCG026788 // CCG025103 // CCG023890 // CCG001961 // CCG015946 // CCG023528 // CCG017645 // CCG011954 // CCG019…
GO:0009538	C	photosystem I reaction center	5	9153	5	23397	0.0092	0.62	// CCG002950 // CCG023656 // CCG019822 // CCG005510 // CCG012082
GO:0019005	C	SCF ubiquitin ligase complex	17	9153	27	23397	0.01	0.68	// CCG011318 // CCG013245 // CCG003247 // CCG016989 // CCG002143 // CCG007230 // CCG006360 // CCG024176 // CCG007956 // CCG019888 // CCG010381 // CCG028674 // CCG020949 // CCG004171 // CCG000960 // CCG012397 // CCG020272
GO:0030054	C	cell junction	154	9153	340	23397	0.012	0.76	// CCG000718 // CCG015280 // CCG025686 // CCG026521 // CCG008825 // CCG019604 // CCG020344 // CCG010002 // CCG022251 // CCG027642 // CCG005624 // CCG019218 // CCG013507 // CCG006544 // CCG025685 // CCG002580 // CCG012319 // CCG017302 // CCG023132 // CCG025256 // CCG025688 // CCG023648 // CCG023647 // CCG021370 // CCG010498 // CCG010499 // CCG000339 // CCG023924 // CCG017656 // CCG008656 // CCG006…
GO:0009506	C	plasmodesma	153	9153	338	23397	0.013	0.76	// CCG000718 // CCG015280 // CCG025686 // CCG026521 // CCG008825 // CCG019604 // CCG020344 // CCG010002 // CCG022251 // CCG027642 // CCG005624 // CCG019218 // CCG013507 // CCG006544 // CCG025685 // CCG002580 // CCG012319 // CCG017302 // CCG023132 // CCG025256 // CCG025688 // CCG023648 // CCG023647 // CCG021370 // CCG010498 // CCG010499 // CCG000339 // CCG023924 // CCG017656 // CCG008656 // CCG006…
GO:0055044	C	symplast	153	9153	338	23397	0.013	0.76	// CCG000718 // CCG015280 // CCG025686 // CCG026521 // CCG008825 // CCG019604 // CCG020344 // CCG010002 // CCG022251 // CCG027642 // CCG005624 // CCG019218 // CCG013507 // CCG006544 // CCG025685 // CCG002580 // CCG012319 // CCG017302 // CCG023132 // CCG025256 // CCG025688 // CCG023648 // CCG023647 // CCG021370 // CCG010498 // CCG010499 // CCG000339 // CCG023924 // CCG017656 // CCG008656 // CCG006…
GO:0005911	C	cell-cell junction	153	9153	339	23397	0.015	0.83	// CCG000718 // CCG015280 // CCG025686 // CCG026521 // CCG008825 // CCG019604 // CCG020344 // CCG010002 // CCG022251 // CCG027642 // CCG005624 // CCG019218 // CCG013507 // CCG006544 // CCG025685 // CCG002580 // CCG012319 // CCG017302 // CCG023132 // CCG025256 // CCG025688 // CCG023648 // CCG023647 // CCG021370 // CCG010498 // CCG010499 // CCG000339 // CCG023924 // CCG017656 // CCG008656 // CCG006…
GO:0010287	C	plastoglobule	21	9153	39	23397	0.044	1	// CCG020036 // CCG001076 // CCG022028 // CCG022029 // CCG006442 // CCG022143 // CCG020995 // CCG005836 // CCG003656 // CCG003488 // CCG022027 // CCG008541 // CCG029303 // CCG023463 // CCG025834 // CCG027546 // CCG023466 // CCG028864 // CCG011362 // CCG023465 // CCG005916
GO:0009521	C	photosystem	34	9153	68	23397	0.045	1	// CCG023656 // CCG027760 // CCG002950 // CCG008661 // CCG016714 // CCG020036 // CCG019822 // CCG007635 // CCG022645 // CCG005510 // CCG015440 // CCG024863 // CCG027867 // CCG001076 // CCG029303 // CCG000995 // CCG025834 // CCG011362 // CCG012846 // CCG008441 // CCG004757 // CCG027775 // CCG009749 // CCG028864 // CCG006082 // CCG005916 // CCG022028 // CCG022029 // CCG006442 // CCG012082 // CCG022…

## Sheet: Table S4-2
Table S4-2. Hour 1 gene ontology of the differentially expressed genes (DEGs)
GO_acc	term_type	Term	queryitem	querytotal	refitem	reftotal	pvalue	FDR	entries
GO:0008037	P	cell recognition	36	2019	125	23397	7.6e-11	1.8e-07	// CCG019063 // CCG021404 // CCG021400 // CCG021402 // CCG014625 // CCG014624 // CCG014626 // CCG014135 // CCG016290 // CCG014133 // CCG001340 // CCG014154 // CCG001345 // CCG021399 // CCG000082 // CCG000083 // CCG026245 // CCG018979 // CCG019455 // CCG019457 // CCG008836 // CCG019459 // CCG000814 // CCG018980 // CCG004150 // CCG010450 // CCG010690 // CCG010691 // CCG010697 // CCG027442 // CCG008…
GO:0048544	P	recognition of pollen	36	2019	125	23397	7.6e-11	1.8e-07	// CCG019063 // CCG021404 // CCG021400 // CCG021402 // CCG014625 // CCG014624 // CCG014626 // CCG014135 // CCG016290 // CCG014133 // CCG001340 // CCG014154 // CCG001345 // CCG021399 // CCG000082 // CCG000083 // CCG026245 // CCG018979 // CCG019455 // CCG019457 // CCG008836 // CCG019459 // CCG000814 // CCG018980 // CCG004150 // CCG010450 // CCG010690 // CCG010691 // CCG010697 // CCG027442 // CCG008…
GO:0006468	P	protein phosphorylation	230	2019	1720	23397	2.2e-10	2.4e-07	// CCG022371 // CCG010249 // CCG027930 // CCG028164 // CCG019217 // CCG009614 // CCG024788 // CCG017027 // CCG023838 // CCG010802 // CCG014832 // CCG001340 // CCG029182 // CCG001345 // CCG011804 // CCG022798 // CCG009798 // CCG007492 // CCG028116 // CCG002492 // CCG002356 // CCG016102 // CCG011780 // CCG026925 // CCG005973 // CCG029246 // CCG013595 // CCG012139 // CCG010499 // CCG021470 // CCG022…
GO:0009875	P	pollen-pistil interaction	36	2019	130	23397	2.6e-10	2.4e-07	// CCG019063 // CCG021404 // CCG021400 // CCG021402 // CCG014625 // CCG014624 // CCG014626 // CCG014135 // CCG016290 // CCG014133 // CCG001340 // CCG014154 // CCG001345 // CCG021399 // CCG000082 // CCG000083 // CCG026245 // CCG018979 // CCG019455 // CCG019457 // CCG008836 // CCG019459 // CCG000814 // CCG018980 // CCG004150 // CCG010450 // CCG010690 // CCG010691 // CCG010697 // CCG027442 // CCG008…
GO:0042744	P	hydrogen peroxide catabolic process	36	2019	130	23397	2.6e-10	2.4e-07	// CCG016481 // CCG002896 // CCG027642 // CCG002890 // CCG023508 // CCG002892 // CCG002894 // CCG020659 // CCG016480 // CCG002899 // CCG024757 // CCG000125 // CCG000124 // CCG003934 // CCG005419 // CCG014175 // CCG019397 // CCG020955 // CCG002897 // CCG026105 // CCG026106 // CCG019398 // CCG024754 // CCG024755 // CCG002887 // CCG002884 // CCG020647 // CCG023924 // CCG020660 // CCG014413 // CCG019…
GO:0042743	P	hydrogen peroxide metabolic process	36	2019	139	23397	1.9e-09	1.4e-06	// CCG016481 // CCG002896 // CCG027642 // CCG002890 // CCG023508 // CCG002892 // CCG002894 // CCG020659 // CCG016480 // CCG002899 // CCG024757 // CCG000125 // CCG000124 // CCG003934 // CCG005419 // CCG014175 // CCG019397 // CCG020955 // CCG002897 // CCG026105 // CCG026106 // CCG019398 // CCG024754 // CCG024755 // CCG002887 // CCG002884 // CCG020647 // CCG023924 // CCG020660 // CCG014413 // CCG019…
GO:0098869	P	cellular oxidant detoxification	50	2019	244	23397	1.1e-08	6.2e-06	// CCG026105 // CCG016481 // CCG009436 // CCG002896 // CCG013813 // CCG027642 // CCG002890 // CCG023508 // CCG002892 // CCG002894 // CCG020659 // CCG016480 // CCG002899 // CCG024757 // CCG000125 // CCG000124 // CCG003934 // CCG005419 // CCG014175 // CCG019397 // CCG020955 // CCG020722 // CCG002897 // CCG016498 // CCG026106 // CCG009447 // CCG019398 // CCG013823 // CCG001307 // CCG024754 // CCG000…
GO:1990748	P	cellular detoxification	50	2019	244	23397	1.1e-08	6.2e-06	// CCG026105 // CCG016481 // CCG009436 // CCG002896 // CCG013813 // CCG027642 // CCG002890 // CCG023508 // CCG002892 // CCG002894 // CCG020659 // CCG016480 // CCG002899 // CCG024757 // CCG000125 // CCG000124 // CCG003934 // CCG005419 // CCG014175 // CCG019397 // CCG020955 // CCG020722 // CCG002897 // CCG016498 // CCG026106 // CCG009447 // CCG019398 // CCG013823 // CCG001307 // CCG024754 // CCG000…
GO:2001141	P	regulation of RNA biosynthetic process	225	2019	1761	23397	1.4e-08	6.2e-06	// CCG007895 // CCG001433 // CCG018064 // CCG026635 // CCG009227 // CCG019601 // CCG000130 // CCG012589 // CCG005625 // CCG018266 // CCG016443 // CCG004227 // CCG016560 // CCG029506 // CCG012310 // CCG008056 // CCG011593 // CCG000258 // CCG016012 // CCG004300 // CCG026452 // CCG007961 // CCG012793 // CCG006868 // CCG015930 // CCG027637 // CCG009248 // CCG018488 // CCG006025 // CCG018070 // CCG008…
GO:1903506	P	regulation of nucleic acid-templated transcription	225	2019	1761	23397	1.4e-08	6.2e-06	// CCG007895 // CCG001433 // CCG018064 // CCG026635 // CCG009227 // CCG019601 // CCG000130 // CCG012589 // CCG005625 // CCG018266 // CCG016443 // CCG004227 // CCG016560 // CCG029506 // CCG012310 // CCG008056 // CCG011593 // CCG000258 // CCG016012 // CCG004300 // CCG026452 // CCG007961 // CCG012793 // CCG006868 // CCG015930 // CCG027637 // CCG009248 // CCG018488 // CCG006025 // CCG018070 // CCG008…
GO:0006355	P	regulation of transcription, DNA-templated	221	2019	1734	23397	2.1e-08	8.9e-06	// CCG007895 // CCG001433 // CCG018064 // CCG026635 // CCG009227 // CCG019601 // CCG000130 // CCG012589 // CCG005625 // CCG018266 // CCG016443 // CCG004227 // CCG016560 // CCG029506 // CCG012310 // CCG008056 // CCG011593 // CCG000258 // CCG016012 // CCG004300 // CCG026452 // CCG007961 // CCG012793 // CCG006868 // CCG015930 // CCG027637 // CCG009248 // CCG018488 // CCG006025 // CCG018070 // CCG008…
GO:0000186	P	activation of MAPKK activity	38	2019	166	23397	2.7e-08	1e-05	// CCG001770 // CCG025332 // CCG022572 // CCG028304 // CCG019272 // CCG021404 // CCG023477 // CCG021402 // CCG005973 // CCG014832 // CCG029182 // CCG016402 // CCG011804 // CCG029122 // CCG026782 // CCG002492 // CCG018979 // CCG006060 // CCG022568 // CCG021399 // CCG010499 // CCG025711 // CCG018980 // CCG009622 // CCG022561 // CCG022560 // CCG010690 // CCG010691 // CCG018982 // CCG022569 // CCG010…
GO:0098754	P	detoxification	50	2019	253	23397	3.6e-08	1.3e-05	// CCG026105 // CCG016481 // CCG009436 // CCG002896 // CCG013813 // CCG027642 // CCG002890 // CCG023508 // CCG002892 // CCG002894 // CCG020659 // CCG016480 // CCG002899 // CCG024757 // CCG000125 // CCG000124 // CCG003934 // CCG005419 // CCG014175 // CCG019397 // CCG020955 // CCG020722 // CCG002897 // CCG016498 // CCG026106 // CCG009447 // CCG019398 // CCG013823 // CCG001307 // CCG024754 // CCG000…
GO:0043410	P	positive regulation of MAPK cascade	38	2019	170	23397	5.2e-08	1.7e-05	// CCG001770 // CCG025332 // CCG022572 // CCG028304 // CCG019272 // CCG021404 // CCG023477 // CCG021402 // CCG005973 // CCG014832 // CCG029182 // CCG016402 // CCG011804 // CCG029122 // CCG026782 // CCG002492 // CCG018979 // CCG006060 // CCG022568 // CCG021399 // CCG010499 // CCG025711 // CCG018980 // CCG009622 // CCG022561 // CCG022560 // CCG010690 // CCG010691 // CCG018982 // CCG022569 // CCG010…
GO:0043405	P	regulation of MAP kinase activity	38	2019	171	23397	6.2e-08	1.8e-05	// CCG001770 // CCG025332 // CCG022572 // CCG028304 // CCG019272 // CCG021404 // CCG023477 // CCG021402 // CCG005973 // CCG014832 // CCG029182 // CCG016402 // CCG011804 // CCG029122 // CCG026782 // CCG002492 // CCG018979 // CCG006060 // CCG022568 // CCG021399 // CCG010499 // CCG025711 // CCG018980 // CCG009622 // CCG022561 // CCG022560 // CCG010690 // CCG010691 // CCG018982 // CCG022569 // CCG010…
GO:0051252	P	regulation of RNA metabolic process	225	2019	1797	23397	6.4e-08	1.8e-05	// CCG007895 // CCG001433 // CCG018064 // CCG026635 // CCG009227 // CCG019601 // CCG000130 // CCG012589 // CCG005625 // CCG018266 // CCG016443 // CCG004227 // CCG016560 // CCG029506 // CCG012310 // CCG008056 // CCG011593 // CCG000258 // CCG016012 // CCG004300 // CCG026452 // CCG007961 // CCG012793 // CCG006868 // CCG015930 // CCG027637 // CCG009248 // CCG018488 // CCG006025 // CCG018070 // CCG008…
GO:0044706	P	multi-multicellular organism process	44	2019	216	23397	9.1e-08	2.3e-05	// CCG019063 // CCG004835 // CCG021404 // CCG000293 // CCG021400 // CCG021402 // CCG014625 // CCG014624 // CCG014626 // CCG014135 // CCG016290 // CCG014133 // CCG001340 // CCG014154 // CCG001345 // CCG021399 // CCG000082 // CCG000083 // CCG026245 // CCG018979 // CCG021493 // CCG013112 // CCG019455 // CCG019457 // CCG008836 // CCG019459 // CCG000814 // CCG018980 // CCG004150 // CCG010450 // CCG010…
GO:0009856	P	pollination	44	2019	216	23397	9.1e-08	2.3e-05	// CCG019063 // CCG004835 // CCG021404 // CCG000293 // CCG021400 // CCG021402 // CCG014625 // CCG014624 // CCG014626 // CCG014135 // CCG016290 // CCG014133 // CCG001340 // CCG014154 // CCG001345 // CCG021399 // CCG000082 // CCG000083 // CCG026245 // CCG018979 // CCG021493 // CCG013112 // CCG019455 // CCG019457 // CCG008836 // CCG019459 // CCG000814 // CCG018980 // CCG004150 // CCG010450 // CCG010…
GO:0044703	P	multi-organism reproductive process	47	2019	240	23397	1.2e-07	2.9e-05	// CCG011231 // CCG011234 // CCG019063 // CCG004835 // CCG021404 // CCG000293 // CCG013286 // CCG021400 // CCG021402 // CCG014625 // CCG014624 // CCG014626 // CCG014135 // CCG016290 // CCG014133 // CCG001340 // CCG014154 // CCG001345 // CCG021399 // CCG000082 // CCG000083 // CCG026245 // CCG018979 // CCG021493 // CCG013112 // CCG019455 // CCG019457 // CCG008836 // CCG019459 // CCG000814 // CCG018…
GO:0009636	P	response to toxic substance	51	2019	271	23397	1.4e-07	3.1e-05	// CCG026105 // CCG016481 // CCG009436 // CCG002896 // CCG013813 // CCG027642 // CCG002890 // CCG023508 // CCG002892 // CCG002894 // CCG020659 // CCG016480 // CCG002899 // CCG024757 // CCG000125 // CCG000124 // CCG003934 // CCG005419 // CCG014175 // CCG019397 // CCG020955 // CCG020722 // CCG002897 // CCG016498 // CCG026106 // CCG009447 // CCG019398 // CCG013823 // CCG001307 // CCG024754 // CCG000…
GO:0043408	P	regulation of MAPK cascade	39	2019	185	23397	1.8e-07	4e-05	// CCG001770 // CCG025332 // CCG022572 // CCG020647 // CCG028304 // CCG019272 // CCG021404 // CCG023477 // CCG021402 // CCG005973 // CCG014832 // CCG029182 // CCG016402 // CCG011804 // CCG029122 // CCG026782 // CCG002492 // CCG018979 // CCG006060 // CCG022568 // CCG021399 // CCG010499 // CCG025711 // CCG018980 // CCG009622 // CCG022561 // CCG022560 // CCG010690 // CCG010691 // CCG018982 // CCG022…
GO:0016310	P	phosphorylation	278	2019	2333	23397	2e-07	4.1e-05	// CCG022371 // CCG010249 // CCG003118 // CCG013585 // CCG022560 // CCG022398 // CCG028164 // CCG014272 // CCG019217 // CCG007550 // CCG009614 // CCG024788 // CCG017027 // CCG000322 // CCG023838 // CCG010802 // CCG014832 // CCG003910 // CCG001340 // CCG029182 // CCG001345 // CCG011804 // CCG026201 // CCG022798 // CCG009798 // CCG010666 // CCG003911 // CCG010577 // CCG007492 // CCG028116 // CCG010…
GO:1902533	P	positive regulation of intracellular signal transduction	38	2019	180	23397	2.5e-07	5e-05	// CCG001770 // CCG025332 // CCG022572 // CCG028304 // CCG019272 // CCG021404 // CCG023477 // CCG021402 // CCG005973 // CCG014832 // CCG029182 // CCG016402 // CCG011804 // CCG029122 // CCG026782 // CCG002492 // CCG018979 // CCG006060 // CCG022568 // CCG021399 // CCG010499 // CCG025711 // CCG018980 // CCG009622 // CCG022561 // CCG022560 // CCG010690 // CCG010691 // CCG018982 // CCG022569 // CCG010…
GO:0032147	P	activation of protein kinase activity	41	2019	203	23397	3.1e-07	5.8e-05	// CCG001770 // CCG025332 // CCG022572 // CCG028304 // CCG019272 // CCG021404 // CCG023477 // CCG021402 // CCG005973 // CCG014832 // CCG029182 // CCG016402 // CCG011804 // CCG029122 // CCG026782 // CCG002492 // CCG018979 // CCG002356 // CCG006060 // CCG022568 // CCG021399 // CCG010499 // CCG025711 // CCG018980 // CCG009622 // CCG022561 // CCG022560 // CCG010690 // CCG010691 // CCG018982 // CCG022…
GO:0080090	P	regulation of primary metabolic process	281	2019	2376	23397	3.2e-07	5.8e-05	// CCG007895 // CCG001433 // CCG018064 // CCG026635 // CCG009227 // CCG019601 // CCG009992 // CCG000130 // CCG012589 // CCG023477 // CCG005625 // CCG018266 // CCG005973 // CCG004227 // CCG016560 // CCG008131 // CCG029506 // CCG012310 // CCG014832 // CCG008056 // CCG000071 // CCG029182 // CCG011804 // CCG011593 // CCG000258 // CCG016012 // CCG004300 // CCG026452 // CCG007961 // CCG012793 // CCG006…
GO:0031323	P	regulation of cellular metabolic process	282	2019	2389	23397	3.5e-07	6.3e-05	// CCG007895 // CCG001433 // CCG018064 // CCG026635 // CCG009227 // CCG019601 // CCG009992 // CCG000130 // CCG012589 // CCG023477 // CCG005625 // CCG018266 // CCG005973 // CCG004227 // CCG016560 // CCG008131 // CCG029506 // CCG012310 // CCG014832 // CCG008056 // CCG000071 // CCG029182 // CCG011804 // CCG011593 // CCG000258 // CCG016012 // CCG004300 // CCG026452 // CCG007961 // CCG012793 // CCG020…
GO:0097659	P	nucleic acid-templated transcription	233	2019	1918	23397	3.8e-07	6.4e-05	// CCG029278 // CCG007895 // CCG001433 // CCG018064 // CCG026635 // CCG009227 // CCG019601 // CCG000130 // CCG012589 // CCG005625 // CCG018266 // CCG016443 // CCG004227 // CCG016560 // CCG029506 // CCG012310 // CCG008056 // CCG011593 // CCG000258 // CCG016012 // CCG026201 // CCG026452 // CCG007961 // CCG012793 // CCG006868 // CCG028116 // CCG027637 // CCG009248 // CCG018488 // CCG006025 // CCG018…
GO:0019219	P	regulation of nucleobase-containing compound metabolic process	225	2019	1848	23397	4.8e-07	7.9e-05	// CCG007895 // CCG001433 // CCG018064 // CCG026635 // CCG009227 // CCG019601 // CCG000130 // CCG012589 // CCG005625 // CCG018266 // CCG016443 // CCG004227 // CCG016560 // CCG029506 // CCG012310 // CCG008056 // CCG011593 // CCG000258 // CCG016012 // CCG004300 // CCG026452 // CCG007961 // CCG012793 // CCG006868 // CCG015930 // CCG027637 // CCG009248 // CCG018488 // CCG006025 // CCG018070 // CCG008…
GO:0000165	P	MAPK cascade	40	2019	202	23397	7.2e-07	0.00011	// CCG001770 // CCG025332 // CCG022572 // CCG020647 // CCG028304 // CCG019272 // CCG021404 // CCG023477 // CCG021402 // CCG005973 // CCG014832 // CCG029182 // CCG016402 // CCG011804 // CCG029122 // CCG026782 // CCG002492 // CCG018979 // CCG006060 // CCG022568 // CCG021399 // CCG010499 // CCG025711 // CCG018980 // CCG009622 // CCG022561 // CCG022560 // CCG010690 // CCG010691 // CCG018982 // CCG022…
GO:0010556	P	regulation of macromolecule biosynthetic process	229	2019	1900	23397	8e-07	0.00012	// CCG007895 // CCG001433 // CCG018064 // CCG026635 // CCG009227 // CCG019601 // CCG009992 // CCG000130 // CCG012589 // CCG005625 // CCG018266 // CCG016443 // CCG004227 // CCG016560 // CCG008131 // CCG029506 // CCG012310 // CCG008056 // CCG011593 // CCG000258 // CCG016012 // CCG004300 // CCG026452 // CCG007961 // CCG012793 // CCG006868 // CCG015930 // CCG027637 // CCG009248 // CCG018488 // CCG006…
GO:0006351	P	transcription, DNA-templated	228	2019	1891	23397	8.2e-07	0.00012	// CCG029278 // CCG007895 // CCG001433 // CCG018064 // CCG026635 // CCG009227 // CCG019601 // CCG000130 // CCG012589 // CCG005625 // CCG018266 // CCG016443 // CCG004227 // CCG016560 // CCG029506 // CCG012310 // CCG008056 // CCG011593 // CCG000258 // CCG016012 // CCG026201 // CCG026452 // CCG007961 // CCG012793 // CCG006868 // CCG028116 // CCG027637 // CCG009248 // CCG018488 // CCG006025 // CCG018…
GO:0032774	P	RNA biosynthetic process	233	2019	1940	23397	8.4e-07	0.00012	// CCG029278 // CCG007895 // CCG001433 // CCG018064 // CCG026635 // CCG009227 // CCG019601 // CCG000130 // CCG012589 // CCG005625 // CCG018266 // CCG016443 // CCG004227 // CCG016560 // CCG029506 // CCG012310 // CCG008056 // CCG011593 // CCG000258 // CCG016012 // CCG026201 // CCG026452 // CCG007961 // CCG012793 // CCG006868 // CCG028116 // CCG027637 // CCG009248 // CCG018488 // CCG006025 // CCG018…
GO:2000112	P	regulation of cellular macromolecule biosynthetic process	225	2019	1870	23397	1.1e-06	0.00015	// CCG007895 // CCG001433 // CCG018064 // CCG026635 // CCG009227 // CCG019601 // CCG009992 // CCG000130 // CCG012589 // CCG005625 // CCG018266 // CCG016443 // CCG004227 // CCG016560 // CCG008131 // CCG029506 // CCG012310 // CCG008056 // CCG011593 // CCG000258 // CCG016012 // CCG004300 // CCG026452 // CCG007961 // CCG012793 // CCG006868 // CCG015930 // CCG027637 // CCG009248 // CCG018488 // CCG006…
GO:0045860	P	positive regulation of protein kinase activity	41	2019	216	23397	1.6e-06	0.00022	// CCG001770 // CCG025332 // CCG022572 // CCG028304 // CCG019272 // CCG021404 // CCG023477 // CCG021402 // CCG005973 // CCG014832 // CCG029182 // CCG016402 // CCG011804 // CCG029122 // CCG026782 // CCG002492 // CCG018979 // CCG002356 // CCG006060 // CCG022568 // CCG021399 // CCG010499 // CCG025711 // CCG018980 // CCG009622 // CCG022561 // CCG022560 // CCG010690 // CCG010691 // CCG018982 // CCG022…
GO:0031326	P	regulation of cellular biosynthetic process	230	2019	1930	23397	1.7e-06	0.00022	// CCG007895 // CCG001433 // CCG018064 // CCG026635 // CCG009227 // CCG019601 // CCG009992 // CCG000130 // CCG012589 // CCG005625 // CCG018266 // CCG016443 // CCG004227 // CCG016560 // CCG008131 // CCG029506 // CCG012310 // CCG008056 // CCG011593 // CCG000258 // CCG016012 // CCG004300 // CCG026452 // CCG007961 // CCG012793 // CCG020955 // CCG006868 // CCG015930 // CCG027637 // CCG009248 // CCG018…
GO:0009889	P	regulation of biosynthetic process	230	2019	1933	23397	1.8e-06	0.00023	// CCG007895 // CCG001433 // CCG018064 // CCG026635 // CCG009227 // CCG019601 // CCG009992 // CCG000130 // CCG012589 // CCG005625 // CCG018266 // CCG016443 // CCG004227 // CCG016560 // CCG008131 // CCG029506 // CCG012310 // CCG008056 // CCG011593 // CCG000258 // CCG016012 // CCG004300 // CCG026452 // CCG007961 // CCG012793 // CCG020955 // CCG006868 // CCG015930 // CCG027637 // CCG009248 // CCG018…
GO:0042221	P	response to chemical	175	2019	1405	23397	1.8e-06	0.00023	// CCG028202 // CCG026524 // CCG024346 // CCG013813 // CCG019601 // CCG020220 // CCG018266 // CCG004224 // CCG005948 // CCG000125 // CCG000124 // CCG005419 // CCG000551 // CCG014175 // CCG007044 // CCG004300 // CCG026105 // CCG010765 // CCG020890 // CCG010883 // CCG017548 // CCG002897 // CCG027642 // CCG023647 // CCG026384 // CCG012139 // CCG020350 // CCG008227 // CCG010914 // CCG027930 // CCG023…
GO:0001934	P	positive regulation of protein phosphorylation	41	2019	217	23397	1.9e-06	0.00023	// CCG001770 // CCG025332 // CCG022572 // CCG028304 // CCG019272 // CCG021404 // CCG023477 // CCG021402 // CCG005973 // CCG014832 // CCG029182 // CCG016402 // CCG011804 // CCG029122 // CCG026782 // CCG002492 // CCG018979 // CCG002356 // CCG006060 // CCG022568 // CCG021399 // CCG010499 // CCG025711 // CCG018980 // CCG009622 // CCG022561 // CCG022560 // CCG010690 // CCG010691 // CCG018982 // CCG022…
GO:0071900	P	regulation of protein serine/threonine kinase activity	38	2019	195	23397	2e-06	0.00023	// CCG001770 // CCG025332 // CCG022572 // CCG028304 // CCG019272 // CCG021404 // CCG023477 // CCG021402 // CCG005973 // CCG014832 // CCG029182 // CCG016402 // CCG011804 // CCG029122 // CCG026782 // CCG002492 // CCG018979 // CCG006060 // CCG022568 // CCG021399 // CCG010499 // CCG025711 // CCG018980 // CCG009622 // CCG022561 // CCG022560 // CCG010690 // CCG010691 // CCG018982 // CCG022569 // CCG010…
GO:0033674	P	positive regulation of kinase activity	41	2019	218	23397	2.1e-06	0.00024	// CCG001770 // CCG025332 // CCG022572 // CCG028304 // CCG019272 // CCG021404 // CCG023477 // CCG021402 // CCG005973 // CCG014832 // CCG029182 // CCG016402 // CCG011804 // CCG029122 // CCG026782 // CCG002492 // CCG018979 // CCG002356 // CCG006060 // CCG022568 // CCG021399 // CCG010499 // CCG025711 // CCG018980 // CCG009622 // CCG022561 // CCG022560 // CCG010690 // CCG010691 // CCG018982 // CCG022…
GO:0051347	P	positive regulation of transferase activity	46	2019	257	23397	2.2e-06	0.00024	// CCG001770 // CCG025332 // CCG022572 // CCG028304 // CCG019272 // CCG021404 // CCG023477 // CCG021402 // CCG005973 // CCG010843 // CCG014832 // CCG029182 // CCG016402 // CCG011804 // CCG029122 // CCG014850 // CCG026782 // CCG002492 // CCG018979 // CCG002356 // CCG006060 // CCG022568 // CCG021399 // CCG020350 // CCG010499 // CCG025711 // CCG018980 // CCG009622 // CCG022561 // CCG022560 // CCG010…
GO:0042327	P	positive regulation of phosphorylation	41	2019	219	23397	2.4e-06	0.00024	// CCG001770 // CCG025332 // CCG022572 // CCG028304 // CCG019272 // CCG021404 // CCG023477 // CCG021402 // CCG005973 // CCG014832 // CCG029182 // CCG016402 // CCG011804 // CCG029122 // CCG026782 // CCG002492 // CCG018979 // CCG002356 // CCG006060 // CCG022568 // CCG021399 // CCG010499 // CCG025711 // CCG018980 // CCG009622 // CCG022561 // CCG022560 // CCG010690 // CCG010691 // CCG018982 // CCG022…
GO:0010562	P	positive regulation of phosphorus metabolic process	41	2019	219	23397	2.4e-06	0.00024	// CCG001770 // CCG025332 // CCG022572 // CCG028304 // CCG019272 // CCG021404 // CCG023477 // CCG021402 // CCG005973 // CCG014832 // CCG029182 // CCG016402 // CCG011804 // CCG029122 // CCG026782 // CCG002492 // CCG018979 // CCG002356 // CCG006060 // CCG022568 // CCG021399 // CCG010499 // CCG025711 // CCG018980 // CCG009622 // CCG022561 // CCG022560 // CCG010690 // CCG010691 // CCG018982 // CCG022…
GO:0045937	P	positive regulation of phosphate metabolic process	41	2019	219	23397	2.4e-06	0.00024	// CCG001770 // CCG025332 // CCG022572 // CCG028304 // CCG019272 // CCG021404 // CCG023477 // CCG021402 // CCG005973 // CCG014832 // CCG029182 // CCG016402 // CCG011804 // CCG029122 // CCG026782 // CCG002492 // CCG018979 // CCG002356 // CCG006060 // CCG022568 // CCG021399 // CCG010499 // CCG025711 // CCG018980 // CCG009622 // CCG022561 // CCG022560 // CCG010690 // CCG010691 // CCG018982 // CCG022…
GO:0072593	P	reactive oxygen species metabolic process	37	2019	189	23397	2.4e-06	0.00024	// CCG016481 // CCG002896 // CCG027642 // CCG002890 // CCG023508 // CCG002892 // CCG002894 // CCG020659 // CCG016480 // CCG002899 // CCG024757 // CCG000125 // CCG000124 // CCG003934 // CCG005419 // CCG014175 // CCG019397 // CCG020955 // CCG002897 // CCG026105 // CCG026106 // CCG019398 // CCG024754 // CCG024755 // CCG002887 // CCG002884 // CCG020647 // CCG023924 // CCG020660 // CCG014413 // CCG019…
GO:0018212	P	peptidyl-tyrosine modification	52	2019	310	23397	3.7e-06	0.00036	// CCG010249 // CCG002122 // CCG022572 // CCG007610 // CCG024277 // CCG017968 // CCG014625 // CCG014624 // CCG014626 // CCG009262 // CCG016677 // CCG014135 // CCG004150 // CCG008209 // CCG024946 // CCG014133 // CCG014154 // CCG019459 // CCG004947 // CCG007492 // CCG001157 // CCG001156 // CCG019102 // CCG000919 // CCG019455 // CCG019457 // CCG006060 // CCG012848 // CCG008245 // CCG028096 // CCG008…
GO:0018108	P	peptidyl-tyrosine phosphorylation	52	2019	310	23397	3.7e-06	0.00036	// CCG010249 // CCG002122 // CCG022572 // CCG007610 // CCG024277 // CCG017968 // CCG014625 // CCG014624 // CCG014626 // CCG009262 // CCG016677 // CCG014135 // CCG004150 // CCG008209 // CCG024946 // CCG014133 // CCG014154 // CCG019459 // CCG004947 // CCG007492 // CCG001157 // CCG001156 // CCG019102 // CCG000919 // CCG019455 // CCG019457 // CCG006060 // CCG012848 // CCG008245 // CCG028096 // CCG008…
GO:0060255	P	regulation of macromolecule metabolic process	285	2019	2494	23397	3.7e-06	0.00036	// CCG007895 // CCG001433 // CCG018064 // CCG026635 // CCG009227 // CCG019601 // CCG009992 // CCG000130 // CCG012589 // CCG023477 // CCG005625 // CCG018266 // CCG005973 // CCG004227 // CCG016560 // CCG008131 // CCG029506 // CCG012310 // CCG014832 // CCG008056 // CCG000071 // CCG029182 // CCG011804 // CCG011593 // CCG000258 // CCG016012 // CCG004300 // CCG026452 // CCG007961 // CCG012793 // CCG006…
GO:0023056	P	positive regulation of signaling	38	2019	201	23397	4.2e-06	0.00038	// CCG001770 // CCG025332 // CCG022572 // CCG028304 // CCG019272 // CCG021404 // CCG023477 // CCG021402 // CCG005973 // CCG014832 // CCG029182 // CCG016402 // CCG011804 // CCG029122 // CCG026782 // CCG002492 // CCG018979 // CCG006060 // CCG022568 // CCG021399 // CCG010499 // CCG025711 // CCG018980 // CCG009622 // CCG022561 // CCG022560 // CCG010690 // CCG010691 // CCG018982 // CCG022569 // CCG010…
GO:0006796	P	phosphate-containing compound metabolic process	347	2019	3115	23397	4.2e-06	0.00038	// CCG024990 // CCG010249 // CCG013585 // CCG011804 // CCG022798 // CCG007492 // CCG003101 // CCG005637 // CCG029372 // CCG012982 // CCG012983 // CCG029470 // CCG012386 // CCG025773 // CCG026782 // CCG028304 // CCG019272 // CCG021404 // CCG021400 // CCG021402 // CCG008497 // CCG000276 // CCG000577 // CCG017406 // CCG024192 // CCG000814 // CCG018257 // CCG009554 // CCG009557 // CCG024763 // CCG009…
GO:0009967	P	positive regulation of signal transduction	38	2019	201	23397	4.2e-06	0.00038	// CCG001770 // CCG025332 // CCG022572 // CCG028304 // CCG019272 // CCG021404 // CCG023477 // CCG021402 // CCG005973 // CCG014832 // CCG029182 // CCG016402 // CCG011804 // CCG029122 // CCG026782 // CCG002492 // CCG018979 // CCG006060 // CCG022568 // CCG021399 // CCG010499 // CCG025711 // CCG018980 // CCG009622 // CCG022561 // CCG022560 // CCG010690 // CCG010691 // CCG018982 // CCG022569 // CCG010…
GO:1902531	P	regulation of intracellular signal transduction	40	2019	218	23397	5.1e-06	0.00045	// CCG001770 // CCG025332 // CCG022572 // CCG020647 // CCG028304 // CCG019272 // CCG021404 // CCG023477 // CCG016402 // CCG021402 // CCG005973 // CCG014832 // CCG029182 // CCG004247 // CCG011804 // CCG029122 // CCG026782 // CCG002492 // CCG018979 // CCG006060 // CCG022568 // CCG021399 // CCG010499 // CCG025711 // CCG018980 // CCG009622 // CCG022561 // CCG022560 // CCG010690 // CCG010691 // CCG018…
GO:0031401	P	positive regulation of protein modification process	46	2019	265	23397	5.1e-06	0.00045	// CCG001770 // CCG025332 // CCG022572 // CCG028304 // CCG019272 // CCG021404 // CCG023477 // CCG021402 // CCG005973 // CCG010843 // CCG014832 // CCG029182 // CCG016402 // CCG011804 // CCG029122 // CCG014850 // CCG026782 // CCG002492 // CCG018979 // CCG002356 // CCG006060 // CCG022568 // CCG021399 // CCG020350 // CCG010499 // CCG025711 // CCG018980 // CCG009622 // CCG022561 // CCG022560 // CCG010…
GO:0010647	P	positive regulation of cell communication	38	2019	203	23397	5.4e-06	0.00046	// CCG001770 // CCG025332 // CCG022572 // CCG028304 // CCG019272 // CCG021404 // CCG023477 // CCG021402 // CCG005973 // CCG014832 // CCG029182 // CCG016402 // CCG011804 // CCG029122 // CCG026782 // CCG002492 // CCG018979 // CCG006060 // CCG022568 // CCG021399 // CCG010499 // CCG025711 // CCG018980 // CCG009622 // CCG022561 // CCG022560 // CCG010690 // CCG010691 // CCG018982 // CCG022569 // CCG010…
GO:0006793	P	phosphorus metabolic process	347	2019	3130	23397	6.1e-06	0.00051	// CCG024990 // CCG010249 // CCG013585 // CCG011804 // CCG022798 // CCG007492 // CCG003101 // CCG005637 // CCG029372 // CCG012982 // CCG012983 // CCG029470 // CCG012386 // CCG025773 // CCG026782 // CCG028304 // CCG019272 // CCG021404 // CCG021400 // CCG021402 // CCG008497 // CCG000276 // CCG000577 // CCG017406 // CCG024192 // CCG000814 // CCG018257 // CCG009554 // CCG009557 // CCG024763 // CCG009…
GO:0051171	P	regulation of nitrogen compound metabolic process	229	2019	1964	23397	7.3e-06	0.0006	// CCG007895 // CCG001433 // CCG018064 // CCG026635 // CCG009227 // CCG019601 // CCG009992 // CCG000130 // CCG012589 // CCG005625 // CCG018266 // CCG016443 // CCG004227 // CCG016560 // CCG008131 // CCG029506 // CCG012310 // CCG008056 // CCG011593 // CCG000258 // CCG016012 // CCG004300 // CCG026452 // CCG007961 // CCG012793 // CCG006868 // CCG015930 // CCG027637 // CCG009248 // CCG018488 // CCG006…
GO:0023014	P	signal transduction by protein phosphorylation	44	2019	253	23397	7.7e-06	0.00062	// CCG001770 // CCG025332 // CCG022572 // CCG020647 // CCG028304 // CCG019272 // CCG021404 // CCG023477 // CCG021402 // CCG005973 // CCG014832 // CCG029182 // CCG016402 // CCG011804 // CCG029122 // CCG026782 // CCG002492 // CCG018979 // CCG002356 // CCG006060 // CCG022568 // CCG021399 // CCG010499 // CCG025711 // CCG018980 // CCG009622 // CCG022561 // CCG022560 // CCG010690 // CCG010691 // CCG018…
GO:0019222	P	regulation of metabolic process	288	2019	2558	23397	9.9e-06	0.00078	// CCG007895 // CCG001433 // CCG018064 // CCG026635 // CCG009227 // CCG019601 // CCG009992 // CCG000130 // CCG012589 // CCG023477 // CCG005625 // CCG018266 // CCG005973 // CCG004227 // CCG016560 // CCG008131 // CCG029506 // CCG012310 // CCG014832 // CCG008056 // CCG000071 // CCG029182 // CCG011804 // CCG011593 // CCG000258 // CCG016012 // CCG004300 // CCG026452 // CCG007961 // CCG012793 // CCG020…
GO:0051704	P	multi-organism process	88	2019	634	23397	1.1e-05	0.00084	// CCG009619 // CCG014832 // CCG001340 // CCG001345 // CCG022798 // CCG000594 // CCG014088 // CCG020350 // CCG013112 // CCG022562 // CCG022561 // CCG025450 // CCG024912 // CCG029571 // CCG011461 // CCG006795 // CCG019063 // CCG021404 // CCG013286 // CCG021400 // CCG021402 // CCG014154 // CCG028797 // CCG027065 // CCG003483 // CCG021399 // CCG000814 // CCG004150 // CCG028798 // CCG005911 // CCG018…
GO:0007154	P	cell communication	217	2019	1871	23397	1.6e-05	0.0012	// CCG014154 // CCG007010 // CCG010249 // CCG015822 // CCG022560 // CCG013813 // CCG019601 // CCG002199 // CCG007550 // CCG009614 // CCG024788 // CCG017027 // CCG027655 // CCG017023 // CCG025578 // CCG010802 // CCG006035 // CCG014832 // CCG001340 // CCG029182 // CCG000551 // CCG001345 // CCG011804 // CCG020438 // CCG009055 // CCG009299 // CCG002492 // CCG013093 // CCG000594 // CCG011785 // CCG009…
GO:0010200	P	response to chitin	11	2019	30	23397	2.3e-05	0.0018	// CCG025009 // CCG025505 // CCG007308 // CCG010222 // CCG004300 // CCG007795 // CCG015908 // CCG029041 // CCG010775 // CCG017548 // CCG004828
GO:0010468	P	regulation of gene expression	229	2019	2012	23397	3.2e-05	0.0024	// CCG007895 // CCG001433 // CCG018064 // CCG026635 // CCG009227 // CCG019601 // CCG009992 // CCG000130 // CCG012589 // CCG005625 // CCG018266 // CCG016443 // CCG004227 // CCG016560 // CCG008131 // CCG029506 // CCG012310 // CCG008056 // CCG011593 // CCG000258 // CCG016012 // CCG004300 // CCG026452 // CCG007961 // CCG012793 // CCG006868 // CCG015930 // CCG027637 // CCG009248 // CCG018488 // CCG006…
GO:0045859	P	regulation of protein kinase activity	41	2019	245	23397	3.8e-05	0.0028	// CCG001770 // CCG025332 // CCG022572 // CCG028304 // CCG019272 // CCG021404 // CCG023477 // CCG021402 // CCG005973 // CCG014832 // CCG029182 // CCG016402 // CCG011804 // CCG029122 // CCG026782 // CCG002492 // CCG018979 // CCG002356 // CCG006060 // CCG022568 // CCG021399 // CCG010499 // CCG025711 // CCG018980 // CCG009622 // CCG022561 // CCG022560 // CCG010690 // CCG010691 // CCG018982 // CCG022…
GO:0043549	P	regulation of kinase activity	41	2019	246	23397	4.2e-05	0.003	// CCG001770 // CCG025332 // CCG022572 // CCG028304 // CCG019272 // CCG021404 // CCG023477 // CCG021402 // CCG005973 // CCG014832 // CCG029182 // CCG016402 // CCG011804 // CCG029122 // CCG026782 // CCG002492 // CCG018979 // CCG002356 // CCG006060 // CCG022568 // CCG021399 // CCG010499 // CCG025711 // CCG018980 // CCG009622 // CCG022561 // CCG022560 // CCG010690 // CCG010691 // CCG018982 // CCG022…
GO:0009611	P	response to wounding	17	2019	67	23397	4.2e-05	0.003	// CCG029549 // CCG026384 // CCG028838 // CCG013215 // CCG024912 // CCG005659 // CCG020248 // CCG008227 // CCG009217 // CCG004723 // CCG017883 // CCG024133 // CCG011597 // CCG004668 // CCG000594 // CCG004828 // CCG006522
GO:0048584	P	positive regulation of response to stimulus	46	2019	290	23397	5.3e-05	0.0037	// CCG001770 // CCG025332 // CCG022572 // CCG005163 // CCG028304 // CCG019272 // CCG021404 // CCG023477 // CCG008091 // CCG021402 // CCG005973 // CCG014832 // CCG029182 // CCG016402 // CCG011804 // CCG029122 // CCG026782 // CCG002492 // CCG018979 // CCG000594 // CCG021391 // CCG018981 // CCG006060 // CCG022568 // CCG021399 // CCG010499 // CCG025711 // CCG018980 // CCG009622 // CCG022561 // CCG022…
GO:0051338	P	regulation of transferase activity	46	2019	291	23397	5.7e-05	0.0039	// CCG001770 // CCG025332 // CCG022572 // CCG028304 // CCG019272 // CCG021404 // CCG023477 // CCG021402 // CCG005973 // CCG010843 // CCG014832 // CCG029182 // CCG016402 // CCG011804 // CCG029122 // CCG014850 // CCG026782 // CCG002492 // CCG018979 // CCG002356 // CCG006060 // CCG022568 // CCG021399 // CCG020350 // CCG010499 // CCG025711 // CCG018980 // CCG009622 // CCG022561 // CCG022560 // CCG010…
GO:0015698	P	inorganic anion transport	26	2019	132	23397	6.1e-05	0.0041	// CCG020455 // CCG010029 // CCG013878 // CCG018288 // CCG016631 // CCG024008 // CCG008592 // CCG013873 // CCG004245 // CCG015912 // CCG027266 // CCG005046 // CCG022691 // CCG029206 // CCG010030 // CCG022635 // CCG022634 // CCG022738 // CCG006206 // CCG000507 // CCG006340 // CCG020044 // CCG002002 // CCG007857 // CCG022689 // CCG029157
GO:0050794	P	regulation of cellular process	433	2019	4119	23397	7e-05	0.0047	// CCG010249 // CCG002199 // CCG018575 // CCG008131 // CCG029506 // CCG012310 // CCG011804 // CCG027637 // CCG011367 // CCG006025 // CCG013805 // CCG013806 // CCG024420 // CCG029372 // CCG011941 // CCG029470 // CCG012224 // CCG016669 // CCG029571 // CCG029535 // CCG020926 // CCG012386 // CCG003198 // CCG023415 // CCG028301 // CCG026782 // CCG028304 // CCG019272 // CCG021404 // CCG010942 // CCG021…
GO:0015689	P	molybdate ion transport	7	2019	14	23397	7.2e-05	0.0047	// CCG020455 // CCG013873 // CCG013878 // CCG022635 // CCG022634 // CCG018288 // CCG027266
GO:0006979	P	response to oxidative stress	47	2019	303	23397	7.7e-05	0.005	// CCG016481 // CCG028783 // CCG006950 // CCG002896 // CCG027642 // CCG002890 // CCG023508 // CCG002892 // CCG002894 // CCG020659 // CCG016480 // CCG002899 // CCG011733 // CCG024757 // CCG000125 // CCG000124 // CCG003934 // CCG005419 // CCG008371 // CCG014175 // CCG019397 // CCG020955 // CCG002897 // CCG026105 // CCG026106 // CCG019398 // CCG028092 // CCG024754 // CCG009447 // CCG024755 // CCG002…
GO:0001932	P	regulation of protein phosphorylation	42	2019	262	23397	8.4e-05	0.0054	// CCG001770 // CCG025332 // CCG022572 // CCG020647 // CCG028304 // CCG019272 // CCG021404 // CCG023477 // CCG021402 // CCG005973 // CCG014832 // CCG029182 // CCG016402 // CCG011804 // CCG029122 // CCG026782 // CCG002492 // CCG018979 // CCG002356 // CCG006060 // CCG022568 // CCG021399 // CCG010499 // CCG025711 // CCG018980 // CCG009622 // CCG022561 // CCG022560 // CCG010690 // CCG010691 // CCG018…
GO:0065007	P	biological regulation	516	2019	4998	23397	9.7e-05	0.0061	// CCG010249 // CCG002199 // CCG024788 // CCG018575 // CCG008131 // CCG029506 // CCG012310 // CCG011804 // CCG005227 // CCG027637 // CCG011367 // CCG006025 // CCG013805 // CCG013806 // CCG024420 // CCG022169 // CCG022168 // CCG001971 // CCG029372 // CCG011941 // CCG029470 // CCG012224 // CCG016669 // CCG029571 // CCG029535 // CCG020926 // CCG008100 // CCG012386 // CCG003198 // CCG023415 // CCG026…
GO:0042325	P	regulation of phosphorylation	42	2019	264	23397	0.0001	0.0062	// CCG001770 // CCG025332 // CCG022572 // CCG020647 // CCG028304 // CCG019272 // CCG021404 // CCG023477 // CCG021402 // CCG005973 // CCG014832 // CCG029182 // CCG016402 // CCG011804 // CCG029122 // CCG026782 // CCG002492 // CCG018979 // CCG002356 // CCG006060 // CCG022568 // CCG021399 // CCG010499 // CCG025711 // CCG018980 // CCG009622 // CCG022561 // CCG022560 // CCG010690 // CCG010691 // CCG018…
GO:0009966	P	regulation of signal transduction	51	2019	342	23397	0.00011	0.0068	// CCG001770 // CCG025332 // CCG022572 // CCG020647 // CCG028304 // CCG019272 // CCG021404 // CCG023477 // CCG016402 // CCG021402 // CCG005973 // CCG015488 // CCG028734 // CCG029549 // CCG008153 // CCG002853 // CCG028838 // CCG029182 // CCG004247 // CCG011804 // CCG029122 // CCG026782 // CCG002492 // CCG018979 // CCG008835 // CCG006060 // CCG022568 // CCG026384 // CCG021399 // CCG010499 // CCG025…
GO:0023051	P	regulation of signaling	51	2019	343	23397	0.00012	0.0072	// CCG001770 // CCG025332 // CCG022572 // CCG020647 // CCG028304 // CCG019272 // CCG021404 // CCG023477 // CCG016402 // CCG021402 // CCG005973 // CCG015488 // CCG028734 // CCG029549 // CCG008153 // CCG002853 // CCG028838 // CCG029182 // CCG004247 // CCG011804 // CCG029122 // CCG026782 // CCG002492 // CCG018979 // CCG008835 // CCG006060 // CCG022568 // CCG026384 // CCG021399 // CCG010499 // CCG025…
GO:0010646	P	regulation of cell communication	51	2019	344	23397	0.00013	0.0076	// CCG001770 // CCG025332 // CCG022572 // CCG020647 // CCG028304 // CCG019272 // CCG021404 // CCG023477 // CCG016402 // CCG021402 // CCG005973 // CCG015488 // CCG028734 // CCG029549 // CCG008153 // CCG002853 // CCG028838 // CCG029182 // CCG004247 // CCG011804 // CCG029122 // CCG026782 // CCG002492 // CCG018979 // CCG008835 // CCG006060 // CCG022568 // CCG026384 // CCG021399 // CCG010499 // CCG025…
GO:0050789	P	regulation of biological process	453	2019	4371	23397	0.00016	0.0092	// CCG010249 // CCG002199 // CCG018575 // CCG008131 // CCG029506 // CCG012310 // CCG011804 // CCG027637 // CCG011367 // CCG006025 // CCG013805 // CCG013806 // CCG024420 // CCG029372 // CCG011941 // CCG029470 // CCG012224 // CCG016669 // CCG029571 // CCG029535 // CCG020926 // CCG012386 // CCG003198 // CCG023415 // CCG028301 // CCG026782 // CCG028304 // CCG019272 // CCG021404 // CCG010942 // CCG021…
GO:0002239	P	response to oomycetes	9	2019	26	23397	0.00022	0.013	// CCG014291 // CCG014292 // CCG014293 // CCG014088 // CCG014289 // CCG009892 // CCG012343 // CCG012345 // CCG012346
GO:0019748	P	secondary metabolic process	51	2019	353	23397	0.00024	0.014	// CCG008411 // CCG010481 // CCG009000 // CCG013817 // CCG006039 // CCG013813 // CCG028164 // CCG007614 // CCG025277 // CCG015480 // CCG015481 // CCG014039 // CCG007613 // CCG007320 // CCG015201 // CCG011597 // CCG010478 // CCG012235 // CCG006589 // CCG012290 // CCG011603 // CCG005419 // CCG013355 // CCG001242 // CCG028653 // CCG020955 // CCG012062 // CCG013094 // CCG028734 // CCG012289 // CCG008…
GO:0044093	P	positive regulation of molecular function	52	2019	363	23397	0.00026	0.015	// CCG001770 // CCG025332 // CCG022572 // CCG028304 // CCG019272 // CCG021404 // CCG022212 // CCG023477 // CCG021402 // CCG005973 // CCG019826 // CCG008592 // CCG014832 // CCG029182 // CCG016402 // CCG011804 // CCG029122 // CCG014850 // CCG010843 // CCG026782 // CCG002492 // CCG018979 // CCG021822 // CCG002356 // CCG001853 // CCG006060 // CCG022568 // CCG021399 // CCG020350 // CCG010499 // CCG025…
GO:0032270	P	positive regulation of cellular protein metabolic process	47	2019	323	23397	0.00035	0.019	// CCG001770 // CCG025332 // CCG022572 // CCG028304 // CCG019272 // CCG021404 // CCG023477 // CCG021402 // CCG005973 // CCG009628 // CCG010843 // CCG014832 // CCG029182 // CCG016402 // CCG011804 // CCG029122 // CCG014850 // CCG026782 // CCG002492 // CCG018979 // CCG002356 // CCG006060 // CCG022568 // CCG021399 // CCG020350 // CCG010499 // CCG025711 // CCG018980 // CCG009622 // CCG022561 // CCG022…
GO:0007165	P	signal transduction	187	2019	1675	23397	0.00035	0.02	// CCG025578 // CCG007010 // CCG010249 // CCG028456 // CCG022560 // CCG013813 // CCG019601 // CCG002199 // CCG007550 // CCG009614 // CCG024788 // CCG017027 // CCG027655 // CCG017023 // CCG010802 // CCG006035 // CCG014832 // CCG001340 // CCG029182 // CCG000551 // CCG011804 // CCG020438 // CCG009055 // CCG009299 // CCG002492 // CCG013093 // CCG011785 // CCG027659 // CCG013805 // CCG013806 // CCG005…
GO:0044700	P	single organism signaling	188	2019	1686	23397	0.00036	0.02	// CCG025578 // CCG007010 // CCG010249 // CCG028456 // CCG022560 // CCG013813 // CCG019601 // CCG002199 // CCG007550 // CCG009614 // CCG024788 // CCG017027 // CCG027655 // CCG017023 // CCG010802 // CCG006035 // CCG014832 // CCG001340 // CCG029182 // CCG000551 // CCG011804 // CCG020438 // CCG009055 // CCG009299 // CCG002492 // CCG013093 // CCG011785 // CCG009031 // CCG013805 // CCG013806 // CCG005…
GO:0051247	P	positive regulation of protein metabolic process	47	2019	324	23397	0.00037	0.02	// CCG001770 // CCG025332 // CCG022572 // CCG028304 // CCG019272 // CCG021404 // CCG023477 // CCG021402 // CCG005973 // CCG009628 // CCG010843 // CCG014832 // CCG029182 // CCG016402 // CCG011804 // CCG029122 // CCG014850 // CCG026782 // CCG002492 // CCG018979 // CCG002356 // CCG006060 // CCG022568 // CCG021399 // CCG020350 // CCG010499 // CCG025711 // CCG018980 // CCG009622 // CCG022561 // CCG022…
GO:0023052	P	signaling	188	2019	1688	23397	0.00038	0.021	// CCG025578 // CCG007010 // CCG010249 // CCG028456 // CCG022560 // CCG013813 // CCG019601 // CCG002199 // CCG007550 // CCG009614 // CCG024788 // CCG017027 // CCG027655 // CCG017023 // CCG010802 // CCG006035 // CCG014832 // CCG001340 // CCG029182 // CCG000551 // CCG011804 // CCG020438 // CCG009055 // CCG009299 // CCG002492 // CCG013093 // CCG011785 // CCG009031 // CCG013805 // CCG013806 // CCG005…
GO:0050896	P	response to stimulus	416	2019	4042	23397	0.00041	0.021	// CCG010249 // CCG027642 // CCG002199 // CCG020220 // CCG000125 // CCG000124 // CCG014171 // CCG005419 // CCG014175 // CCG011804 // CCG022798 // CCG010765 // CCG010883 // CCG013093 // CCG013805 // CCG013806 // CCG010994 // CCG024346 // CCG029372 // CCG007753 // CCG029470 // CCG016669 // CCG029571 // CCG012386 // CCG003198 // CCG026782 // CCG028304 // CCG019272 // CCG021404 // CCG021402 // CCG014…
GO:0043085	P	positive regulation of catalytic activity	51	2019	361	23397	0.00041	0.021	// CCG001770 // CCG025332 // CCG022572 // CCG028304 // CCG019272 // CCG021404 // CCG022212 // CCG023477 // CCG021402 // CCG005973 // CCG019826 // CCG014832 // CCG029182 // CCG016402 // CCG011804 // CCG029122 // CCG014850 // CCG010843 // CCG026782 // CCG002492 // CCG018979 // CCG021822 // CCG002356 // CCG001853 // CCG006060 // CCG022568 // CCG021399 // CCG020350 // CCG010499 // CCG025711 // CCG018…
GO:0048583	P	regulation of response to stimulus	68	2019	520	23397	0.00051	0.026	// CCG028202 // CCG005163 // CCG001770 // CCG025332 // CCG022572 // CCG020647 // CCG006392 // CCG028304 // CCG019272 // CCG021404 // CCG023477 // CCG008091 // CCG021402 // CCG005973 // CCG016402 // CCG015488 // CCG028734 // CCG029549 // CCG008153 // CCG002853 // CCG028838 // CCG029182 // CCG004247 // CCG011804 // CCG018981 // CCG029122 // CCG004828 // CCG026782 // CCG008694 // CCG010697 // CCG018…
GO:0034654	P	nucleobase-containing compound biosynthetic process	241	2019	2242	23397	0.00055	0.028	// CCG029278 // CCG007895 // CCG001433 // CCG018064 // CCG026635 // CCG009227 // CCG019601 // CCG000130 // CCG012589 // CCG005625 // CCG018266 // CCG016443 // CCG004227 // CCG016560 // CCG029506 // CCG012310 // CCG008056 // CCG011593 // CCG000258 // CCG016012 // CCG026201 // CCG026452 // CCG007961 // CCG012793 // CCG010577 // CCG006868 // CCG028116 // CCG027637 // CCG009248 // CCG018488 // CCG006…
GO:0009719	P	response to endogenous stimulus	83	2019	667	23397	0.00066	0.033	// CCG019939 // CCG010044 // CCG012645 // CCG009262 // CCG018754 // CCG007308 // CCG010222 // CCG012648 // CCG006950 // CCG000594 // CCG027930 // CCG013813 // CCG019601 // CCG013214 // CCG029041 // CCG009248 // CCG020220 // CCG020257 // CCG005163 // CCG014500 // CCG026516 // CCG007020 // CCG005536 // CCG005948 // CCG028734 // CCG029549 // CCG013208 // CCG001196 // CCG007698 // CCG025505 // CCG002…
GO:0051174	P	regulation of phosphorus metabolic process	44	2019	306	23397	0.00067	0.033	// CCG001770 // CCG025332 // CCG022572 // CCG020647 // CCG028304 // CCG019272 // CCG021404 // CCG023477 // CCG021402 // CCG005973 // CCG015488 // CCG014832 // CCG029182 // CCG016402 // CCG011804 // CCG029122 // CCG026782 // CCG002492 // CCG018979 // CCG002356 // CCG006060 // CCG022568 // CCG021399 // CCG010499 // CCG025711 // CCG018980 // CCG009622 // CCG022561 // CCG022560 // CCG010690 // CCG010…
GO:0019220	P	regulation of phosphate metabolic process	44	2019	306	23397	0.00067	0.033	// CCG001770 // CCG025332 // CCG022572 // CCG020647 // CCG028304 // CCG019272 // CCG021404 // CCG023477 // CCG021402 // CCG005973 // CCG015488 // CCG014832 // CCG029182 // CCG016402 // CCG011804 // CCG029122 // CCG026782 // CCG002492 // CCG018979 // CCG002356 // CCG006060 // CCG022568 // CCG021399 // CCG010499 // CCG025711 // CCG018980 // CCG009622 // CCG022561 // CCG022560 // CCG010690 // CCG010…
GO:0006470	P	protein dephosphorylation	40	2019	273	23397	0.00078	0.038	// CCG012645 // CCG014278 // CCG020243 // CCG020072 // CCG020070 // CCG012648 // CCG004224 // CCG019644 // CCG004655 // CCG023238 // CCG004019 // CCG014446 // CCG008497 // CCG017023 // CCG011820 // CCG027528 // CCG003173 // CCG023978 // CCG002949 // CCG000276 // CCG017406 // CCG020891 // CCG006923 // CCG014922 // CCG007250 // CCG020069 // CCG009769 // CCG001604 // CCG001816 // CCG023727 // CCG005…
GO:0010243	P	response to organonitrogen compound	13	2019	56	23397	0.00081	0.039	// CCG025009 // CCG025505 // CCG007308 // CCG010222 // CCG024912 // CCG015908 // CCG004300 // CCG007795 // CCG020647 // CCG029041 // CCG010775 // CCG017548 // CCG004828
GO:0009415	P	response to water	23	2019	132	23397	0.00096	0.046	// CCG008091 // CCG018266 // CCG026516 // CCG001196 // CCG028734 // CCG013208 // CCG008592 // CCG012103 // CCG029617 // CCG010883 // CCG011536 // CCG029045 // CCG027065 // CCG023647 // CCG020350 // CCG001440 // CCG000529 // CCG014555 // CCG014654 // CCG014948 // CCG010994 // CCG010993 // CCG012171
GO:0006464	P	cellular protein modification process	339	2019	3291	23397	0.0011	0.049	// CCG009020 // CCG022371 // CCG009262 // CCG010249 // CCG022560 // CCG028164 // CCG011489 // CCG019217 // CCG010690 // CCG009614 // CCG024788 // CCG004224 // CCG017027 // CCG014446 // CCG017023 // CCG012313 // CCG001120 // CCG023838 // CCG010802 // CCG028965 // CCG014278 // CCG014832 // CCG028966 // CCG001340 // CCG000071 // CCG029182 // CCG024632 // CCG001345 // CCG011804 // CCG022798 // CCG009…
GO:0036211	P	protein modification process	339	2019	3291	23397	0.0011	0.049	// CCG009020 // CCG022371 // CCG009262 // CCG010249 // CCG022560 // CCG028164 // CCG011489 // CCG019217 // CCG010690 // CCG009614 // CCG024788 // CCG004224 // CCG017027 // CCG014446 // CCG017023 // CCG012313 // CCG001120 // CCG023838 // CCG010802 // CCG028965 // CCG014278 // CCG014832 // CCG028966 // CCG001340 // CCG000071 // CCG029182 // CCG024632 // CCG001345 // CCG011804 // CCG022798 // CCG009…
GO:0090487	P	secondary metabolite catabolic process	10	2019	38	23397	0.0011	0.052	// CCG012058 // CCG013822 // CCG013823 // CCG013813 // CCG015479 // CCG022752 // CCG013817 // CCG015480 // CCG015481 // CCG013824
GO:0009407	P	toxin catabolic process	10	2019	38	23397	0.0011	0.052	// CCG012058 // CCG013822 // CCG013823 // CCG013813 // CCG015479 // CCG022752 // CCG013817 // CCG015480 // CCG015481 // CCG013824
GO:0006855	P	drug transmembrane transport	17	2019	87	23397	0.0012	0.052	// CCG001564 // CCG028344 // CCG026524 // CCG021888 // CCG028145 // CCG008292 // CCG010599 // CCG015461 // CCG002002 // CCG001823 // CCG016291 // CCG006505 // CCG009064 // CCG008889 // CCG020965 // CCG006605 // CCG024008
GO:0015893	P	drug transport	17	2019	87	23397	0.0012	0.052	// CCG001564 // CCG028344 // CCG026524 // CCG021888 // CCG028145 // CCG008292 // CCG010599 // CCG015461 // CCG002002 // CCG001823 // CCG016291 // CCG006505 // CCG009064 // CCG008889 // CCG020965 // CCG006605 // CCG024008
GO:0031399	P	regulation of protein modification process	49	2019	362	23397	0.0013	0.059	// CCG001770 // CCG025332 // CCG022572 // CCG020647 // CCG028304 // CCG019272 // CCG021404 // CCG023477 // CCG021402 // CCG005973 // CCG015488 // CCG010843 // CCG014832 // CCG029182 // CCG016402 // CCG011804 // CCG029122 // CCG014850 // CCG026782 // CCG002492 // CCG018979 // CCG002356 // CCG006060 // CCG022568 // CCG021399 // CCG020350 // CCG010499 // CCG025711 // CCG018980 // CCG009622 // CCG022…
GO:0044550	P	secondary metabolite biosynthetic process	34	2019	229	23397	0.0015	0.064	// CCG008411 // CCG007320 // CCG009000 // CCG006039 // CCG012289 // CCG028164 // CCG007614 // CCG008662 // CCG014039 // CCG007613 // CCG015201 // CCG011597 // CCG012235 // CCG006589 // CCG012290 // CCG011603 // CCG005419 // CCG013355 // CCG001242 // CCG028653 // CCG020955 // CCG012062 // CCG013094 // CCG008814 // CCG010036 // CCG012291 // CCG025597 // CCG000529 // CCG006696 // CCG008997 // CCG007…
GO:0006820	P	anion transport	36	2019	247	23397	0.0015	0.066	// CCG012728 // CCG020455 // CCG013873 // CCG013878 // CCG018288 // CCG016631 // CCG019849 // CCG007650 // CCG007651 // CCG024008 // CCG008592 // CCG010029 // CCG004245 // CCG015912 // CCG027266 // CCG005046 // CCG022691 // CCG029206 // CCG003064 // CCG010030 // CCG009234 // CCG022635 // CCG015289 // CCG020044 // CCG024170 // CCG006206 // CCG022634 // CCG013377 // CCG000507 // CCG008142 // CCG006…
GO:0042493	P	response to drug	18	2019	98	23397	0.0018	0.077	// CCG001564 // CCG028344 // CCG026524 // CCG021888 // CCG028145 // CCG008292 // CCG010599 // CCG015461 // CCG002002 // CCG009064 // CCG001823 // CCG016291 // CCG006505 // CCG020647 // CCG008889 // CCG020965 // CCG006605 // CCG024008
GO:0009414	P	response to water deprivation	22	2019	130	23397	0.0018	0.077	// CCG008091 // CCG018266 // CCG026516 // CCG001196 // CCG028734 // CCG013208 // CCG008592 // CCG012103 // CCG029617 // CCG010883 // CCG011536 // CCG029045 // CCG027065 // CCG023647 // CCG020350 // CCG000529 // CCG014555 // CCG014654 // CCG014948 // CCG010994 // CCG010993 // CCG012171
GO:0009404	P	toxin metabolic process	10	2019	41	23397	0.0021	0.091	// CCG012058 // CCG013822 // CCG013823 // CCG013813 // CCG015479 // CCG022752 // CCG013817 // CCG015480 // CCG015481 // CCG013824
GO:0043090	P	amino acid import	5	2019	12	23397	0.0023	0.096	// CCG007650 // CCG007651 // CCG014202 // CCG024170 // CCG019849
GO:0009725	P	response to hormone	76	2019	634	23397	0.0028	0.12	// CCG012645 // CCG010044 // CCG025009 // CCG018754 // CCG019939 // CCG012648 // CCG006950 // CCG000594 // CCG027930 // CCG013813 // CCG019601 // CCG013214 // CCG009248 // CCG020220 // CCG020257 // CCG005163 // CCG014500 // CCG026516 // CCG007020 // CCG005536 // CCG005948 // CCG028734 // CCG029549 // CCG013208 // CCG001196 // CCG007698 // CCG025505 // CCG002853 // CCG028838 // CCG016670 // CCG000…
GO:0001101	P	response to acid chemical	57	2019	451	23397	0.0028	0.12	// CCG028493 // CCG025009 // CCG018754 // CCG000594 // CCG005163 // CCG024164 // CCG020220 // CCG008091 // CCG018266 // CCG004224 // CCG026516 // CCG001196 // CCG007402 // CCG028734 // CCG029549 // CCG013208 // CCG008592 // CCG028838 // CCG014654 // CCG016670 // CCG000551 // CCG002199 // CCG012103 // CCG010994 // CCG029617 // CCG020890 // CCG010883 // CCG011536 // CCG029045 // CCG002288 // CCG027…
GO:0055114	P	oxidation-reduction process	292	2019	2859	23397	0.0031	0.13	// CCG019230 // CCG028202 // CCG010481 // CCG010161 // CCG013585 // CCG000233 // CCG025722 // CCG027642 // CCG008538 // CCG028164 // CCG019217 // CCG019047 // CCG020005 // CCG007320 // CCG020248 // CCG014777 // CCG015201 // CCG010478 // CCG000125 // CCG000124 // CCG011603 // CCG005419 // CCG000551 // CCG014175 // CCG008997 // CCG026916 // CCG028448 // CCG020955 // CCG012062 // CCG026750 // CCG009…
GO:1901362	P	organic cyclic compound biosynthetic process	270	2019	2628	23397	0.0031	0.13	// CCG029278 // CCG007895 // CCG007320 // CCG001433 // CCG018064 // CCG025597 // CCG026635 // CCG009227 // CCG019601 // CCG000130 // CCG012589 // CCG005625 // CCG018266 // CCG016443 // CCG004227 // CCG016560 // CCG029506 // CCG012310 // CCG008056 // CCG005419 // CCG025129 // CCG011593 // CCG000258 // CCG016012 // CCG026201 // CCG026452 // CCG007961 // CCG012793 // CCG022042 // CCG010577 // CCG006…
GO:0019438	P	aromatic compound biosynthetic process	256	2019	2484	23397	0.0033	0.13	// CCG029278 // CCG007895 // CCG007320 // CCG001433 // CCG018064 // CCG025597 // CCG026635 // CCG009227 // CCG019601 // CCG000130 // CCG012589 // CCG005625 // CCG018266 // CCG016443 // CCG004227 // CCG015203 // CCG016560 // CCG029506 // CCG012310 // CCG008056 // CCG005419 // CCG011593 // CCG000258 // CCG016012 // CCG026201 // CCG026452 // CCG007961 // CCG012793 // CCG022042 // CCG010577 // CCG006…
GO:0018130	P	heterocycle biosynthetic process	249	2019	2413	23397	0.0034	0.14	// CCG029278 // CCG007895 // CCG001433 // CCG018064 // CCG026916 // CCG026635 // CCG009227 // CCG019601 // CCG000130 // CCG012589 // CCG005625 // CCG018266 // CCG016443 // CCG004227 // CCG016560 // CCG029506 // CCG012310 // CCG008056 // CCG011593 // CCG000258 // CCG016012 // CCG026201 // CCG026452 // CCG007961 // CCG012793 // CCG022042 // CCG010577 // CCG006868 // CCG028116 // CCG027637 // CCG009…
GO:0009816	P	defense response to bacterium, incompatible interaction	5	2019	13	23397	0.0034	0.14	// CCG019398 // CCG019399 // CCG019397 // CCG019400 // CCG019401
GO:0046916	P	cellular transition metal ion homeostasis	17	2019	96	23397	0.0035	0.14	// CCG023390 // CCG004023 // CCG025888 // CCG008100 // CCG025887 // CCG025886 // CCG026615 // CCG002992 // CCG000780 // CCG009369 // CCG029148 // CCG024098 // CCG001971 // CCG023277 // CCG020405 // CCG004022 // CCG004240
GO:0016311	P	dephosphorylation	58	2019	466	23397	0.0036	0.14	// CCG024990 // CCG012645 // CCG027769 // CCG014278 // CCG020243 // CCG020072 // CCG020070 // CCG012648 // CCG000276 // CCG004224 // CCG008497 // CCG019644 // CCG024192 // CCG004655 // CCG023238 // CCG004019 // CCG014446 // CCG013527 // CCG017023 // CCG011820 // CCG027528 // CCG024812 // CCG003173 // CCG023978 // CCG009819 // CCG007841 // CCG006274 // CCG002949 // CCG007046 // CCG008974 // CCG001…
GO:0035556	P	intracellular signal transduction	76	2019	642	23397	0.0038	0.15	// CCG002356 // CCG001770 // CCG019939 // CCG009436 // CCG025332 // CCG022572 // CCG017968 // CCG028304 // CCG019272 // CCG003839 // CCG007550 // CCG023477 // CCG016402 // CCG021402 // CCG005973 // CCG014832 // CCG009798 // CCG001340 // CCG029182 // CCG024802 // CCG004247 // CCG011804 // CCG010690 // CCG022743 // CCG028493 // CCG003911 // CCG026782 // CCG010697 // CCG018979 // CCG016498 // CCG018…
GO:1901700	P	response to oxygen-containing compound	76	2019	644	23397	0.0041	0.16	// CCG028493 // CCG012645 // CCG005163 // CCG018754 // CCG007308 // CCG010222 // CCG000594 // CCG020647 // CCG012648 // CCG002199 // CCG009248 // CCG020220 // CCG008091 // CCG018266 // CCG014500 // CCG026516 // CCG001196 // CCG009262 // CCG007402 // CCG028734 // CCG029549 // CCG013208 // CCG008592 // CCG025505 // CCG028838 // CCG014654 // CCG016670 // CCG000551 // CCG007044 // CCG004300 // CCG012…
GO:0033993	P	response to lipid	42	2019	318	23397	0.0043	0.16	// CCG012645 // CCG025009 // CCG018754 // CCG027930 // CCG012648 // CCG009248 // CCG005163 // CCG004224 // CCG026516 // CCG001196 // CCG009262 // CCG028734 // CCG013208 // CCG025505 // CCG028838 // CCG016670 // CCG000551 // CCG002199 // CCG020890 // CCG011536 // CCG002288 // CCG027065 // CCG023647 // CCG010994 // CCG025304 // CCG007402 // CCG007795 // CCG014555 // CCG020647 // CCG018302 // CCG028…
GO:0002229	P	defense response to oomycetes	6	2019	20	23397	0.0056	0.21	// CCG014291 // CCG014292 // CCG014293 // CCG014088 // CCG014289 // CCG009892
GO:0006811	P	ion transport	107	2019	965	23397	0.0059	0.22	// CCG020455 // CCG001636 // CCG025684 // CCG015289 // CCG005869 // CCG007650 // CCG007651 // CCG009619 // CCG023832 // CCG005227 // CCG010075 // CCG010076 // CCG027659 // CCG007196 // CCG009234 // CCG023647 // CCG027656 // CCG027654 // CCG027655 // CCG020044 // CCG001971 // CCG025835 // CCG024349 // CCG008142 // CCG006340 // CCG001080 // CCG002992 // CCG010082 // CCG008100 // CCG020513 // CCG025…
GO:0005992	P	trehalose biosynthetic process	6	2019	21	23397	0.0072	0.27	// CCG009819 // CCG007046 // CCG008974 // CCG001389 // CCG024192 // CCG027554
GO:0009694	P	jasmonic acid metabolic process	6	2019	22	23397	0.0092	0.34	// CCG026346 // CCG024912 // CCG013215 // CCG004712 // CCG020220 // CCG007605
GO:0005991	P	trehalose metabolic process	6	2019	22	23397	0.0092	0.34	// CCG009819 // CCG007046 // CCG008974 // CCG001389 // CCG024192 // CCG027554
GO:0043473	P	pigmentation	5	2019	16	23397	0.0093	0.34	// CCG012124 // CCG012125 // CCG012126 // CCG012128 // CCG012123
GO:0010411	P	xyloglucan metabolic process	10	2019	53	23397	0.014	0.52	// CCG022154 // CCG023900 // CCG016792 // CCG027829 // CCG004058 // CCG017555 // CCG017552 // CCG004108 // CCG022444 // CCG017963
GO:0015696	P	ammonium transport	5	2019	18	23397	0.016	0.56	// CCG014860 // CCG012528 // CCG029253 // CCG012438 // CCG008458
GO:0072488	P	ammonium transmembrane transport	5	2019	18	23397	0.016	0.56	// CCG014860 // CCG012528 // CCG029253 // CCG012438 // CCG008458
GO:0055076	P	transition metal ion homeostasis	17	2019	112	23397	0.016	0.56	// CCG023390 // CCG004023 // CCG025888 // CCG008100 // CCG025887 // CCG025886 // CCG026615 // CCG002992 // CCG000780 // CCG009369 // CCG029148 // CCG024098 // CCG001971 // CCG023277 // CCG020405 // CCG004022 // CCG004240
GO:0006875	P	cellular metal ion homeostasis	17	2019	113	23397	0.017	0.61	// CCG023390 // CCG004023 // CCG025888 // CCG008100 // CCG025887 // CCG025886 // CCG026615 // CCG002992 // CCG000780 // CCG009369 // CCG029148 // CCG024098 // CCG001971 // CCG023277 // CCG020405 // CCG004022 // CCG004240
GO:0009695	P	jasmonic acid biosynthetic process	5	2019	19	23397	0.02	0.69	// CCG024912 // CCG004712 // CCG013215 // CCG026346 // CCG007605
GO:0009737	P	response to abscisic acid	30	2019	236	23397	0.022	0.76	// CCG025009 // CCG018754 // CCG024164 // CCG005163 // CCG004224 // CCG026516 // CCG001196 // CCG028734 // CCG013208 // CCG028838 // CCG002199 // CCG020438 // CCG020890 // CCG011536 // CCG002288 // CCG027065 // CCG023647 // CCG025304 // CCG007402 // CCG014555 // CCG027930 // CCG028493 // CCG014948 // CCG012139 // CCG010914 // CCG001895 // CCG024912 // CCG006950 // CCG010994 // CCG010993
GO:0097305	P	response to alcohol	30	2019	237	23397	0.023	0.79	// CCG025009 // CCG018754 // CCG024164 // CCG005163 // CCG004224 // CCG026516 // CCG001196 // CCG028734 // CCG013208 // CCG028838 // CCG002199 // CCG020438 // CCG020890 // CCG011536 // CCG002288 // CCG027065 // CCG023647 // CCG025304 // CCG007402 // CCG014555 // CCG027930 // CCG028493 // CCG014948 // CCG012139 // CCG010914 // CCG001895 // CCG024912 // CCG006950 // CCG010994 // CCG010993
GO:0070588	P	calcium ion transmembrane transport	10	2019	57	23397	0.023	0.79	// CCG005018 // CCG005016 // CCG007300 // CCG010082 // CCG025835 // CCG010075 // CCG010076 // CCG005523 // CCG025836 // CCG004177
GO:0006955	P	immune response	19	2019	135	23397	0.024	0.8	// CCG021391 // CCG028797 // CCG016755 // CCG016754 // CCG001080 // CCG024912 // CCG006392 // CCG019398 // CCG006347 // CCG019397 // CCG029571 // CCG003555 // CCG019399 // CCG028798 // CCG005911 // CCG010775 // CCG000594 // CCG019400 // CCG019401
GO:0031325	P	positive regulation of cellular metabolic process	70	2019	636	23397	0.024	0.8	// CCG026747 // CCG001770 // CCG026110 // CCG008414 // CCG025332 // CCG022572 // CCG009227 // CCG028304 // CCG019272 // CCG021404 // CCG023477 // CCG021402 // CCG005973 // CCG027290 // CCG010843 // CCG028734 // CCG014832 // CCG029182 // CCG029122 // CCG016402 // CCG011804 // CCG010690 // CCG011577 // CCG014850 // CCG020955 // CCG026782 // CCG010214 // CCG010215 // CCG010697 // CCG011536 // CCG026…
GO:0006873	P	cellular ion homeostasis	21	2019	155	23397	0.027	0.88	// CCG023390 // CCG004023 // CCG008592 // CCG025888 // CCG004022 // CCG025887 // CCG025886 // CCG026615 // CCG023277 // CCG000780 // CCG002992 // CCG023474 // CCG009369 // CCG029148 // CCG024098 // CCG001971 // CCG022689 // CCG020405 // CCG022691 // CCG004240 // CCG008100
GO:0007166	P	cell surface receptor signaling pathway	35	2019	288	23397	0.027	0.88	// CCG001770 // CCG010249 // CCG001651 // CCG000594 // CCG002788 // CCG007610 // CCG009614 // CCG017027 // CCG016677 // CCG010802 // CCG024945 // CCG009055 // CCG017748 // CCG001157 // CCG007590 // CCG027659 // CCG013595 // CCG027656 // CCG008245 // CCG027654 // CCG010499 // CCG008566 // CCG025304 // CCG005865 // CCG025730 // CCG024788 // CCG027655 // CCG029372 // CCG016761 // CCG012224 // CCG017…
GO:0006952	P	defense response	81	2019	753	23397	0.027	0.88	// CCG022561 // CCG006035 // CCG019939 // CCG014922 // CCG009892 // CCG001080 // CCG006392 // CCG014293 // CCG014923 // CCG005911 // CCG019589 // CCG022219 // CCG029549 // CCG017023 // CCG013805 // CCG011820 // CCG022798 // CCG016755 // CCG016754 // CCG003483 // CCG014832 // CCG016116 // CCG019397 // CCG014289 // CCG002011 // CCG010705 // CCG024912 // CCG009299 // CCG008694 // CCG003890 // CCG009…
GO:0006816	P	calcium ion transport	10	2019	59	23397	0.029	0.94	// CCG005018 // CCG005016 // CCG007300 // CCG010082 // CCG025835 // CCG010075 // CCG010076 // CCG005523 // CCG025836 // CCG004177
GO:0010604	P	positive regulation of macromolecule metabolic process	69	2019	633	23397	0.03	0.96	// CCG026747 // CCG001770 // CCG026110 // CCG008414 // CCG025332 // CCG022572 // CCG009227 // CCG028304 // CCG019272 // CCG021404 // CCG023477 // CCG021402 // CCG005973 // CCG027290 // CCG010843 // CCG028734 // CCG014832 // CCG029182 // CCG029122 // CCG016402 // CCG011804 // CCG010690 // CCG011577 // CCG014850 // CCG026782 // CCG010214 // CCG010215 // CCG010697 // CCG011536 // CCG026635 // CCG009…
GO:0065009	P	regulation of molecular function	69	2019	635	23397	0.031	1	// CCG002356 // CCG026394 // CCG001770 // CCG025332 // CCG022572 // CCG028304 // CCG019272 // CCG021404 // CCG022212 // CCG023477 // CCG016402 // CCG021402 // CCG005973 // CCG010843 // CCG015488 // CCG022568 // CCG019826 // CCG008592 // CCG008153 // CCG014832 // CCG029182 // CCG015406 // CCG004247 // CCG011804 // CCG029122 // CCG014850 // CCG021681 // CCG021678 // CCG026782 // CCG021825 // CCG010…
GO:0006817	P	phosphate ion transport	8	2019	44	23397	0.033	1	// CCG010030 // CCG010029 // CCG006340 // CCG015912 // CCG002002 // CCG022738 // CCG007857 // CCG024008
GO:0009617	P	response to bacterium	25	2019	196	23397	0.033	1	// CCG016972 // CCG009892 // CCG014291 // CCG019398 // CCG019399 // CCG014832 // CCG019397 // CCG022798 // CCG000594 // CCG014088 // CCG014292 // CCG009217 // CCG014293 // CCG022562 // CCG022561 // CCG020647 // CCG004828 // CCG020398 // CCG014289 // CCG015567 // CCG000460 // CCG029571 // CCG024912 // CCG019400 // CCG019401
GO:0009893	P	positive regulation of metabolic process	70	2019	648	23397	0.034	1	// CCG026747 // CCG001770 // CCG026110 // CCG008414 // CCG025332 // CCG022572 // CCG009227 // CCG028304 // CCG019272 // CCG021404 // CCG023477 // CCG021402 // CCG005973 // CCG027290 // CCG010843 // CCG028734 // CCG014832 // CCG029182 // CCG029122 // CCG016402 // CCG011804 // CCG010690 // CCG011577 // CCG014850 // CCG020955 // CCG026782 // CCG010214 // CCG010215 // CCG010697 // CCG011536 // CCG026…
GO:1901698	P	response to nitrogen compound	17	2019	122	23397	0.034	1	// CCG000507 // CCG025009 // CCG025505 // CCG007308 // CCG010222 // CCG024912 // CCG015908 // CCG017548 // CCG019893 // CCG007795 // CCG020647 // CCG029041 // CCG006206 // CCG004300 // CCG029157 // CCG010775 // CCG004828
GO:0045087	P	innate immune response	18	2019	132	23397	0.036	1	// CCG021391 // CCG028797 // CCG016755 // CCG016754 // CCG001080 // CCG024912 // CCG006392 // CCG019398 // CCG006347 // CCG019397 // CCG003555 // CCG019399 // CCG028798 // CCG005911 // CCG010775 // CCG000594 // CCG019400 // CCG019401
GO:0050790	P	regulation of catalytic activity	63	2019	578	23397	0.036	1	// CCG002356 // CCG026394 // CCG001770 // CCG025332 // CCG022572 // CCG028304 // CCG019272 // CCG021404 // CCG022212 // CCG023477 // CCG021402 // CCG005973 // CCG015488 // CCG022568 // CCG019826 // CCG014832 // CCG029182 // CCG015406 // CCG016402 // CCG011804 // CCG029122 // CCG014850 // CCG021681 // CCG021678 // CCG026782 // CCG010697 // CCG018979 // CCG021822 // CCG007500 // CCG026807 // CCG001…
GO:0010033	P	response to organic substance	88	2019	839	23397	0.037	1	// CCG024346 // CCG013813 // CCG019601 // CCG020220 // CCG004224 // CCG005948 // CCG024826 // CCG000551 // CCG007044 // CCG004300 // CCG010765 // CCG020890 // CCG017548 // CCG023647 // CCG026384 // CCG008227 // CCG001570 // CCG027930 // CCG018565 // CCG010408 // CCG007753 // CCG029470 // CCG024912 // CCG006950 // CCG013214 // CCG016669 // CCG029571 // CCG004723 // CCG015908 // CCG019939 // CCG010…
GO:0043207	P	response to external biotic stimulus	43	2019	378	23397	0.041	1	// CCG016972 // CCG009892 // CCG006392 // CCG009619 // CCG014291 // CCG019398 // CCG019399 // CCG014832 // CCG029529 // CCG013567 // CCG014654 // CCG019397 // CCG022798 // CCG000594 // CCG028797 // CCG027065 // CCG014088 // CCG003483 // CCG008754 // CCG014292 // CCG028798 // CCG009217 // CCG014293 // CCG022562 // CCG022561 // CCG020647 // CCG005911 // CCG004668 // CCG004828 // CCG020398 // CCG014…
GO:0007167	P	enzyme linked receptor protein signaling pathway	21	2019	162	23397	0.041	1	// CCG029372 // CCG001770 // CCG010249 // CCG012224 // CCG007590 // CCG017571 // CCG002788 // CCG008566 // CCG025304 // CCG001157 // CCG005865 // CCG009055 // CCG009614 // CCG025730 // CCG009065 // CCG007610 // CCG010775 // CCG010499 // CCG016677 // CCG024788 // CCG028456
GO:0007178	P	transmembrane receptor protein serine/threonine kinase signaling pathway	21	2019	162	23397	0.041	1	// CCG029372 // CCG001770 // CCG010249 // CCG012224 // CCG007590 // CCG017571 // CCG002788 // CCG008566 // CCG025304 // CCG001157 // CCG005865 // CCG009055 // CCG009614 // CCG025730 // CCG009065 // CCG007610 // CCG010775 // CCG010499 // CCG016677 // CCG024788 // CCG028456
GO:0030154	P	cell differentiation	49	2019	439	23397	0.041	1	// CCG019253 // CCG024148 // CCG028301 // CCG011090 // CCG004835 // CCG003975 // CCG000293 // CCG022748 // CCG011910 // CCG005163 // CCG014500 // CCG025233 // CCG021684 // CCG014621 // CCG014620 // CCG004653 // CCG023718 // CCG013112 // CCG024827 // CCG027975 // CCG004093 // CCG009794 // CCG002834 // CCG004346 // CCG012793 // CCG016610 // CCG014314 // CCG029145 // CCG016611 // CCG011536 // CCG021…
GO:0048878	P	chemical homeostasis	36	2019	308	23397	0.041	1	// CCG024184 // CCG000671 // CCG025129 // CCG026615 // CCG026632 // CCG016618 // CCG009369 // CCG023474 // CCG007650 // CCG007651 // CCG023208 // CCG008592 // CCG002853 // CCG004240 // CCG023390 // CCG029148 // CCG024098 // CCG005227 // CCG020405 // CCG022691 // CCG003678 // CCG017883 // CCG021415 // CCG014202 // CCG001971 // CCG023277 // CCG004022 // CCG004023 // CCG025888 // CCG021953 // CCG008…
GO:0003333	P	amino acid transmembrane transport	16	2019	116	23397	0.042	1	// CCG010139 // CCG006565 // CCG024170 // CCG008142 // CCG026602 // CCG019849 // CCG010277 // CCG001007 // CCG003069 // CCG014202 // CCG006106 // CCG009234 // CCG007650 // CCG007651 // CCG002117 // CCG003064
GO:0042391	P	regulation of membrane potential	8	2019	46	23397	0.042	1	// CCG010937 // CCG001080 // CCG004835 // CCG006842 // CCG012678 // CCG006485 // CCG005869 // CCG020513
GO:0008202	P	steroid metabolic process	19	2019	145	23397	0.045	1	// CCG021953 // CCG006636 // CCG005836 // CCG006638 // CCG025722 // CCG025129 // CCG020248 // CCG000671 // CCG027058 // CCG027059 // CCG016618 // CCG029661 // CCG003678 // CCG007605 // CCG006643 // CCG009521 // CCG024133 // CCG023208 // CCG027056
GO:0002376	P	immune system process	19	2019	146	23397	0.048	1	// CCG021391 // CCG028797 // CCG016755 // CCG016754 // CCG001080 // CCG024912 // CCG006392 // CCG019398 // CCG006347 // CCG019397 // CCG029571 // CCG003555 // CCG019399 // CCG028798 // CCG005911 // CCG010775 // CCG000594 // CCG019400 // CCG019401
GO:0030003	P	cellular cation homeostasis	19	2019	146	23397	0.048	1	// CCG023390 // CCG004023 // CCG025888 // CCG004022 // CCG025887 // CCG025886 // CCG026615 // CCG023277 // CCG000780 // CCG002992 // CCG009369 // CCG029148 // CCG024098 // CCG001971 // CCG022689 // CCG020405 // CCG022691 // CCG004240 // CCG008100
GO:0009733	P	response to auxin	25	2019	204	23397	0.049	1	// CCG010044 // CCG013813 // CCG019601 // CCG016670 // CCG007020 // CCG005536 // CCG005948 // CCG024826 // CCG007698 // CCG002853 // CCG010765 // CCG020257 // CCG018308 // CCG024346 // CCG018307 // CCG018565 // CCG000507 // CCG001895 // CCG007753 // CCG029470 // CCG024912 // CCG029531 // CCG013214 // CCG016669 // CCG004993
GO:0001071	F	nucleic acid binding transcription factor activity	154	2019	825	23397	7.4e-19	7.3e-16	// CCG018064 // CCG026635 // CCG009227 // CCG013315 // CCG012589 // CCG018266 // CCG016443 // CCG004227 // CCG016560 // CCG029506 // CCG012310 // CCG011593 // CCG000258 // CCG016012 // CCG007961 // CCG012793 // CCG006868 // CCG027637 // CCG006025 // CCG002353 // CCG029241 // CCG019679 // CCG016389 // CCG009625 // CCG003866 // CCG008897 // CCG000031 // CCG009863 // CCG011941 // CCG011836 // CCG000…
GO:0003700	F	transcription factor activity, sequence-specific DNA binding	154	2019	825	23397	7.4e-19	7.3e-16	// CCG018064 // CCG026635 // CCG009227 // CCG013315 // CCG012589 // CCG018266 // CCG016443 // CCG004227 // CCG016560 // CCG029506 // CCG012310 // CCG011593 // CCG000258 // CCG016012 // CCG007961 // CCG012793 // CCG006868 // CCG027637 // CCG006025 // CCG002353 // CCG029241 // CCG019679 // CCG016389 // CCG009625 // CCG003866 // CCG008897 // CCG000031 // CCG009863 // CCG011941 // CCG011836 // CCG000…
GO:0016684	F	oxidoreductase activity, acting on peroxide as acceptor	45	2019	171	23397	1.2e-11	4.9e-09	// CCG016481 // CCG002896 // CCG013813 // CCG027642 // CCG002890 // CCG023508 // CCG002892 // CCG002894 // CCG020659 // CCG016480 // CCG002899 // CCG024757 // CCG000125 // CCG000124 // CCG003934 // CCG005419 // CCG014175 // CCG019397 // CCG020955 // CCG020722 // CCG002897 // CCG026105 // CCG026106 // CCG013823 // CCG019398 // CCG024754 // CCG000721 // CCG024755 // CCG002887 // CCG002884 // CCG020…
GO:0004601	F	peroxidase activity	45	2019	171	23397	1.2e-11	4.9e-09	// CCG016481 // CCG002896 // CCG013813 // CCG027642 // CCG002890 // CCG023508 // CCG002892 // CCG002894 // CCG020659 // CCG016480 // CCG002899 // CCG024757 // CCG000125 // CCG000124 // CCG003934 // CCG005419 // CCG014175 // CCG019397 // CCG020955 // CCG020722 // CCG002897 // CCG026105 // CCG026106 // CCG013823 // CCG019398 // CCG024754 // CCG000721 // CCG024755 // CCG002887 // CCG002884 // CCG020…
GO:0004672	F	protein kinase activity	229	2019	1657	23397	1.2e-11	4.9e-09	// CCG022371 // CCG010249 // CCG027930 // CCG028164 // CCG019217 // CCG009614 // CCG024788 // CCG017027 // CCG023838 // CCG010802 // CCG014832 // CCG001340 // CCG029182 // CCG001345 // CCG011804 // CCG022798 // CCG009798 // CCG007492 // CCG028116 // CCG002492 // CCG002356 // CCG016102 // CCG011780 // CCG026925 // CCG005973 // CCG029246 // CCG013595 // CCG012139 // CCG010499 // CCG021470 // CCG022…
GO:0004674	F	protein serine/threonine kinase activity	185	2019	1288	23397	3.8e-11	1.3e-08	// CCG024945 // CCG010249 // CCG022560 // CCG019217 // CCG009614 // CCG024788 // CCG017027 // CCG023838 // CCG010802 // CCG014832 // CCG001340 // CCG029182 // CCG011804 // CCG022798 // CCG009055 // CCG002492 // CCG002356 // CCG016102 // CCG014088 // CCG026925 // CCG005973 // CCG013595 // CCG010499 // CCG021470 // CCG022563 // CCG022562 // CCG022561 // CCG027930 // CCG022569 // CCG022568 // CCG029…
GO:0020037	F	heme binding	96	2019	560	23397	1.9e-10	5.2e-08	// CCG025129 // CCG025722 // CCG027642 // CCG028164 // CCG014777 // CCG015201 // CCG007412 // CCG000125 // CCG000124 // CCG011603 // CCG005419 // CCG014175 // CCG028448 // CCG020955 // CCG012062 // CCG013094 // CCG028447 // CCG008814 // CCG023924 // CCG024749 // CCG027032 // CCG008411 // CCG016481 // CCG009000 // CCG016480 // CCG012289 // CCG018160 // CCG002890 // CCG016618 // CCG002892 // CCG002…
GO:0016773	F	phosphotransferase activity, alcohol group as acceptor	239	2019	1815	23397	4.2e-10	1e-07	// CCG022371 // CCG010249 // CCG027930 // CCG022398 // CCG028164 // CCG019217 // CCG007550 // CCG009614 // CCG024788 // CCG017027 // CCG000322 // CCG023838 // CCG010802 // CCG014832 // CCG001340 // CCG029182 // CCG001345 // CCG011804 // CCG026201 // CCG022798 // CCG009798 // CCG003911 // CCG007492 // CCG028116 // CCG002492 // CCG002356 // CCG016102 // CCG011780 // CCG026925 // CCG005973 // CCG029…
GO:0046906	F	tetrapyrrole binding	96	2019	589	23397	2.7e-09	5.9e-07	// CCG025129 // CCG025722 // CCG027642 // CCG028164 // CCG014777 // CCG015201 // CCG007412 // CCG000125 // CCG000124 // CCG011603 // CCG005419 // CCG014175 // CCG028448 // CCG020955 // CCG012062 // CCG013094 // CCG028447 // CCG008814 // CCG023924 // CCG024749 // CCG027032 // CCG008411 // CCG016481 // CCG009000 // CCG016480 // CCG012289 // CCG018160 // CCG002890 // CCG016618 // CCG002892 // CCG002…
GO:0016301	F	kinase activity	276	2019	2216	23397	5.2e-09	1e-06	// CCG022371 // CCG010249 // CCG003118 // CCG013585 // CCG022560 // CCG022398 // CCG028164 // CCG014272 // CCG019217 // CCG007550 // CCG009614 // CCG024788 // CCG017027 // CCG000322 // CCG023838 // CCG010802 // CCG014832 // CCG003910 // CCG001340 // CCG029182 // CCG001345 // CCG011804 // CCG026201 // CCG022798 // CCG009798 // CCG010666 // CCG003911 // CCG010577 // CCG007492 // CCG028116 // CCG010…
GO:0016209	F	antioxidant activity	50	2019	244	23397	1.1e-08	1.9e-06	// CCG026105 // CCG016481 // CCG009436 // CCG002896 // CCG013813 // CCG027642 // CCG002890 // CCG023508 // CCG002892 // CCG002894 // CCG020659 // CCG016480 // CCG002899 // CCG024757 // CCG000125 // CCG000124 // CCG003934 // CCG005419 // CCG014175 // CCG019397 // CCG020955 // CCG020722 // CCG002897 // CCG016498 // CCG026106 // CCG009447 // CCG019398 // CCG013823 // CCG001307 // CCG024754 // CCG000…
GO:0004709	F	MAP kinase kinase kinase activity	38	2019	166	23397	2.7e-08	4.4e-06	// CCG001770 // CCG025332 // CCG022572 // CCG028304 // CCG019272 // CCG021404 // CCG023477 // CCG021402 // CCG005973 // CCG014832 // CCG029182 // CCG016402 // CCG011804 // CCG029122 // CCG026782 // CCG002492 // CCG018979 // CCG006060 // CCG022568 // CCG021399 // CCG010499 // CCG025711 // CCG018980 // CCG009622 // CCG022561 // CCG022560 // CCG010690 // CCG010691 // CCG018982 // CCG022569 // CCG010…
GO:0016705	F	oxidoreductase activity, acting on paired donors, with incorporation or reduction of molecular oxygen	90	2019	571	23397	3.9e-08	5.8e-06	// CCG025129 // CCG025722 // CCG028164 // CCG014777 // CCG015201 // CCG007412 // CCG007723 // CCG011603 // CCG000551 // CCG008997 // CCG028448 // CCG012062 // CCG013094 // CCG028447 // CCG008814 // CCG016901 // CCG001232 // CCG016303 // CCG027032 // CCG008411 // CCG009439 // CCG026399 // CCG012289 // CCG018160 // CCG000671 // CCG017649 // CCG010036 // CCG008984 // CCG014856 // CCG003678 // CCG013…
GO:0043565	F	sequence-specific DNA binding	111	2019	752	23397	4.5e-08	6.4e-06	// CCG029278 // CCG026635 // CCG009227 // CCG012589 // CCG016443 // CCG004227 // CCG004057 // CCG029506 // CCG012310 // CCG007961 // CCG012793 // CCG006868 // CCG028116 // CCG002353 // CCG029241 // CCG019679 // CCG016389 // CCG003866 // CCG008897 // CCG000031 // CCG004250 // CCG005036 // CCG019680 // CCG019681 // CCG003454 // CCG022748 // CCG008414 // CCG028301 // CCG011090 // CCG021170 // CCG006…
GO:0004702	F	receptor signaling protein serine/threonine kinase activity	39	2019	184	23397	1.6e-07	1.9e-05	// CCG001770 // CCG025332 // CCG022572 // CCG028304 // CCG019272 // CCG021404 // CCG023477 // CCG021402 // CCG005973 // CCG014832 // CCG029182 // CCG016402 // CCG011804 // CCG029122 // CCG026782 // CCG002492 // CCG018979 // CCG006060 // CCG022568 // CCG021399 // CCG010499 // CCG025711 // CCG018980 // CCG009622 // CCG022561 // CCG022560 // CCG010690 // CCG010691 // CCG018982 // CCG022569 // CCG010…
GO:0005057	F	receptor signaling protein activity	39	2019	184	23397	1.6e-07	1.9e-05	// CCG001770 // CCG025332 // CCG022572 // CCG028304 // CCG019272 // CCG021404 // CCG023477 // CCG021402 // CCG005973 // CCG014832 // CCG029182 // CCG016402 // CCG011804 // CCG029122 // CCG026782 // CCG002492 // CCG018979 // CCG006060 // CCG022568 // CCG021399 // CCG010499 // CCG025711 // CCG018980 // CCG009622 // CCG022561 // CCG022560 // CCG010690 // CCG010691 // CCG018982 // CCG022569 // CCG010…
GO:0004871	F	signal transducer activity	87	2019	577	23397	4.4e-07	5.1e-05	// CCG010249 // CCG028456 // CCG009614 // CCG024788 // CCG003911 // CCG001340 // CCG029182 // CCG011804 // CCG009055 // CCG002492 // CCG027659 // CCG005973 // CCG027656 // CCG027654 // CCG027655 // CCG005865 // CCG022562 // CCG022561 // CCG022560 // CCG022569 // CCG022568 // CCG029372 // CCG025450 // CCG007421 // CCG011461 // CCG012171 // CCG001651 // CCG026782 // CCG022572 // CCG028304 // CCG019…
GO:0004713	F	protein tyrosine kinase activity	52	2019	309	23397	3.4e-06	0.00037	// CCG010249 // CCG002122 // CCG022572 // CCG007610 // CCG024277 // CCG017968 // CCG014625 // CCG014624 // CCG014626 // CCG009262 // CCG016677 // CCG014135 // CCG004150 // CCG008209 // CCG024946 // CCG014133 // CCG014154 // CCG019459 // CCG004947 // CCG007492 // CCG001157 // CCG001156 // CCG019102 // CCG000919 // CCG019455 // CCG019457 // CCG006060 // CCG012848 // CCG008245 // CCG028096 // CCG008…
GO:0004722	F	protein serine/threonine phosphatase activity	23	2019	95	23397	4.9e-06	0.00051	// CCG012645 // CCG014278 // CCG020243 // CCG012648 // CCG004224 // CCG019644 // CCG004655 // CCG023238 // CCG008497 // CCG000276 // CCG003173 // CCG017406 // CCG020891 // CCG006923 // CCG007250 // CCG009769 // CCG001816 // CCG023727 // CCG002936 // CCG020001 // CCG027528 // CCG020511 // CCG028361
GO:0030246	F	carbohydrate binding	74	2019	500	23397	5.5e-06	0.00054	// CCG024945 // CCG010934 // CCG020508 // CCG020506 // CCG011313 // CCG009892 // CCG019063 // CCG014625 // CCG020504 // CCG023944 // CCG020710 // CCG021402 // CCG006666 // CCG014624 // CCG014626 // CCG017485 // CCG022386 // CCG014135 // CCG014291 // CCG016290 // CCG010802 // CCG024946 // CCG005661 // CCG000340 // CCG001340 // CCG014154 // CCG024961 // CCG024960 // CCG015347 // CCG005209 // CCG010…
GO:0000981	F	RNA polymerase II transcription factor activity, sequence-specific DNA binding	40	2019	220	23397	6.5e-06	0.00061	// CCG019253 // CCG022748 // CCG026110 // CCG008414 // CCG028301 // CCG011090 // CCG005163 // CCG009227 // CCG024148 // CCG011910 // CCG018266 // CCG003975 // CCG025233 // CCG027290 // CCG021684 // CCG014621 // CCG014620 // CCG016610 // CCG023718 // CCG029284 // CCG004093 // CCG009794 // CCG002834 // CCG004346 // CCG012793 // CCG014314 // CCG010214 // CCG010215 // CCG016611 // CCG011536 // CCG010…
GO:0016772	F	transferase activity, transferring phosphorus-containing groups	284	2019	2508	23397	7.4e-06	0.00067	// CCG014154 // CCG010249 // CCG003118 // CCG013585 // CCG022560 // CCG022398 // CCG028164 // CCG014272 // CCG019217 // CCG007550 // CCG009614 // CCG024788 // CCG017027 // CCG000322 // CCG023838 // CCG010802 // CCG014832 // CCG003910 // CCG001340 // CCG029182 // CCG001345 // CCG011804 // CCG026201 // CCG022798 // CCG009798 // CCG010666 // CCG003911 // CCG010577 // CCG007492 // CCG028116 // CCG012…
GO:0001135	F	transcription factor activity, RNA polymerase II transcription factor recruiting	28	2019	134	23397	1.1e-05	0.0009	// CCG019253 // CCG022748 // CCG028301 // CCG011090 // CCG024148 // CCG011910 // CCG005163 // CCG003975 // CCG025233 // CCG021684 // CCG014621 // CCG004346 // CCG016610 // CCG023718 // CCG004093 // CCG009794 // CCG002834 // CCG014620 // CCG012793 // CCG014314 // CCG029145 // CCG016611 // CCG011536 // CCG002353 // CCG027975 // CCG012589 // CCG007401 // CCG007400
GO:0016706	F	oxidoreductase activity, acting on paired donors, with incorporation or reduction of molecular oxygen, 2-oxoglutarate as one donor, and incorporation of one atom each of oxygen into both donors	22	2019	93	23397	1.2e-05	0.00095	// CCG009439 // CCG013320 // CCG006769 // CCG008984 // CCG026084 // CCG012128 // CCG012124 // CCG012125 // CCG012126 // CCG000551 // CCG001568 // CCG012123 // CCG011539 // CCG014856 // CCG003044 // CCG022911 // CCG018302 // CCG016901 // CCG013321 // CCG008997 // CCG024643 // CCG012130
GO:0051213	F	dioxygenase activity	36	2019	198	23397	1.8e-05	0.0014	// CCG009439 // CCG015328 // CCG020877 // CCG006769 // CCG004139 // CCG026084 // CCG012128 // CCG012124 // CCG012125 // CCG012126 // CCG000551 // CCG001568 // CCG004712 // CCG012123 // CCG011539 // CCG014856 // CCG026739 // CCG026750 // CCG003044 // CCG022911 // CCG008984 // CCG000746 // CCG027496 // CCG008997 // CCG018302 // CCG018295 // CCG016901 // CCG013321 // CCG013320 // CCG024643 // CCG017…
GO:0001134	F	transcription factor activity, transcription factor recruiting	28	2019	138	23397	1.9e-05	0.0014	// CCG019253 // CCG022748 // CCG028301 // CCG011090 // CCG024148 // CCG011910 // CCG005163 // CCG003975 // CCG025233 // CCG021684 // CCG014621 // CCG004346 // CCG016610 // CCG023718 // CCG004093 // CCG009794 // CCG002834 // CCG014620 // CCG012793 // CCG014314 // CCG029145 // CCG016611 // CCG011536 // CCG002353 // CCG027975 // CCG012589 // CCG007401 // CCG007400
GO:0004497	F	monooxygenase activity	68	2019	466	23397	2e-05	0.0014	// CCG009127 // CCG008411 // CCG016618 // CCG009000 // CCG001458 // CCG026399 // CCG025722 // CCG000313 // CCG012289 // CCG028164 // CCG018160 // CCG009303 // CCG007614 // CCG008662 // CCG011917 // CCG014039 // CCG000671 // CCG007613 // CCG007228 // CCG014777 // CCG015201 // CCG007412 // CCG013215 // CCG006589 // CCG007723 // CCG028356 // CCG001423 // CCG013241 // CCG012290 // CCG025129 // CCG001…
GO:0045486	F	naringenin 3-dioxygenase activity	8	2019	16	23397	2.1e-05	0.0015	// CCG012128 // CCG012124 // CCG012125 // CCG012126 // CCG012130 // CCG012123 // CCG013321 // CCG013320
GO:0004715	F	non-membrane spanning protein tyrosine kinase activity	32	2019	170	23397	2.5e-05	0.0017	// CCG010249 // CCG007610 // CCG024277 // CCG017968 // CCG009262 // CCG016677 // CCG024946 // CCG014133 // CCG019459 // CCG004947 // CCG007492 // CCG001157 // CCG001156 // CCG019102 // CCG000919 // CCG019455 // CCG019457 // CCG006060 // CCG012848 // CCG008245 // CCG028096 // CCG008566 // CCG005865 // CCG025730 // CCG010690 // CCG010691 // CCG008209 // CCG022569 // CCG012982 // CCG012983 // CCG001…
GO:0001076	F	transcription factor activity, RNA polymerase II transcription factor binding	31	2019	171	23397	6.9e-05	0.0045	// CCG019253 // CCG022748 // CCG028301 // CCG011090 // CCG024148 // CCG011910 // CCG005163 // CCG003975 // CCG025233 // CCG021684 // CCG014621 // CCG014620 // CCG016610 // CCG023718 // CCG004093 // CCG009794 // CCG002834 // CCG004346 // CCG012793 // CCG014314 // CCG029145 // CCG016611 // CCG011536 // CCG018070 // CCG002353 // CCG027975 // CCG012589 // CCG000071 // CCG010836 // CCG007401 // CCG007…
GO:0015098	F	molybdate ion transmembrane transporter activity	7	2019	14	23397	7.2e-05	0.0045	// CCG020455 // CCG013873 // CCG013878 // CCG022635 // CCG022634 // CCG018288 // CCG027266
GO:0004888	F	transmembrane signaling receptor activity	45	2019	289	23397	9.8e-05	0.006	// CCG001770 // CCG010249 // CCG002122 // CCG000594 // CCG002788 // CCG007610 // CCG009614 // CCG014625 // CCG014624 // CCG027655 // CCG014626 // CCG016677 // CCG014135 // CCG004150 // CCG014133 // CCG014154 // CCG009055 // CCG001157 // CCG007590 // CCG027659 // CCG027656 // CCG012848 // CCG001651 // CCG027654 // CCG010499 // CCG008566 // CCG025304 // CCG005865 // CCG025730 // CCG010690 // CCG024…
GO:0099600	F	transmembrane receptor activity	45	2019	292	23397	0.00012	0.0075	// CCG001770 // CCG010249 // CCG002122 // CCG000594 // CCG002788 // CCG007610 // CCG009614 // CCG014625 // CCG014624 // CCG027655 // CCG014626 // CCG016677 // CCG014135 // CCG004150 // CCG014133 // CCG014154 // CCG009055 // CCG001157 // CCG007590 // CCG027659 // CCG027656 // CCG012848 // CCG001651 // CCG027654 // CCG010499 // CCG008566 // CCG025304 // CCG005865 // CCG025730 // CCG010690 // CCG024…
GO:0019199	F	transmembrane receptor protein kinase activity	38	2019	234	23397	0.00013	0.0076	// CCG001770 // CCG010249 // CCG002122 // CCG002788 // CCG007610 // CCG009614 // CCG014625 // CCG014624 // CCG014626 // CCG016677 // CCG014135 // CCG004150 // CCG014133 // CCG014154 // CCG009055 // CCG001157 // CCG007590 // CCG012848 // CCG010499 // CCG008566 // CCG025304 // CCG005865 // CCG025730 // CCG010690 // CCG024788 // CCG022991 // CCG009256 // CCG029372 // CCG008321 // CCG025450 // CCG008…
GO:0003677	F	DNA binding	239	2019	2164	23397	0.00014	0.0076	// CCG029278 // CCG007895 // CCG001433 // CCG018064 // CCG026635 // CCG009227 // CCG000130 // CCG012589 // CCG005625 // CCG018266 // CCG016443 // CCG004227 // CCG016560 // CCG029506 // CCG012310 // CCG003912 // CCG008056 // CCG024630 // CCG011593 // CCG000258 // CCG016012 // CCG004300 // CCG026452 // CCG007961 // CCG012793 // CCG006868 // CCG028116 // CCG027637 // CCG011367 // CCG019721 // CCG028…
GO:0015103	F	inorganic anion transmembrane transporter activity	21	2019	105	23397	0.00024	0.013	// CCG010030 // CCG007857 // CCG020455 // CCG010029 // CCG013873 // CCG029157 // CCG013878 // CCG022635 // CCG004245 // CCG002002 // CCG020044 // CCG018288 // CCG027266 // CCG022689 // CCG005046 // CCG006206 // CCG022634 // CCG022691 // CCG029206 // CCG024008 // CCG016631
GO:0001046	F	core promoter sequence-specific DNA binding	10	2019	32	23397	0.00025	0.013	// CCG026110 // CCG008414 // CCG009227 // CCG003866 // CCG005163 // CCG010214 // CCG010215 // CCG027290 // CCG011536 // CCG010213
GO:0004721	F	phosphoprotein phosphatase activity	38	2019	241	23397	0.00025	0.013	// CCG012645 // CCG014278 // CCG020243 // CCG020072 // CCG020070 // CCG012648 // CCG004224 // CCG019644 // CCG004655 // CCG023238 // CCG004019 // CCG014446 // CCG008497 // CCG017023 // CCG011820 // CCG027528 // CCG003173 // CCG023978 // CCG002949 // CCG000276 // CCG017406 // CCG020891 // CCG006923 // CCG014922 // CCG007250 // CCG020069 // CCG009769 // CCG001604 // CCG001816 // CCG023727 // CCG005…
GO:0016491	F	oxidoreductase activity	288	2019	2698	23397	0.00031	0.015	// CCG019230 // CCG028202 // CCG010481 // CCG010161 // CCG013585 // CCG000233 // CCG025722 // CCG027642 // CCG013813 // CCG028164 // CCG019217 // CCG023924 // CCG007320 // CCG020248 // CCG014777 // CCG015201 // CCG010478 // CCG000125 // CCG000124 // CCG011603 // CCG005419 // CCG000551 // CCG014175 // CCG008997 // CCG026916 // CCG028448 // CCG020955 // CCG012062 // CCG026750 // CCG009678 // CCG013…
GO:0001047	F	core promoter binding	10	2019	33	23397	0.00033	0.016	// CCG026110 // CCG008414 // CCG009227 // CCG003866 // CCG005163 // CCG010214 // CCG010215 // CCG027290 // CCG011536 // CCG010213
GO:0001067	F	regulatory region nucleic acid binding	55	2019	394	23397	0.00034	0.016	// CCG019253 // CCG022748 // CCG026110 // CCG008414 // CCG028301 // CCG011090 // CCG026635 // CCG009227 // CCG022928 // CCG024148 // CCG011910 // CCG005163 // CCG003975 // CCG025233 // CCG027290 // CCG021684 // CCG014621 // CCG014620 // CCG016610 // CCG023718 // CCG004057 // CCG004227 // CCG004093 // CCG009794 // CCG002834 // CCG002199 // CCG004346 // CCG012793 // CCG014314 // CCG010214 // CCG010…
GO:0044212	F	transcription regulatory region DNA binding	55	2019	394	23397	0.00034	0.016	// CCG019253 // CCG022748 // CCG026110 // CCG008414 // CCG028301 // CCG011090 // CCG026635 // CCG009227 // CCG022928 // CCG024148 // CCG011910 // CCG005163 // CCG003975 // CCG025233 // CCG027290 // CCG021684 // CCG014621 // CCG014620 // CCG016610 // CCG023718 // CCG004057 // CCG004227 // CCG004093 // CCG009794 // CCG002834 // CCG002199 // CCG004346 // CCG012793 // CCG014314 // CCG010214 // CCG010…
GO:0000975	F	regulatory region DNA binding	55	2019	394	23397	0.00034	0.016	// CCG019253 // CCG022748 // CCG026110 // CCG008414 // CCG028301 // CCG011090 // CCG026635 // CCG009227 // CCG022928 // CCG024148 // CCG011910 // CCG005163 // CCG003975 // CCG025233 // CCG027290 // CCG021684 // CCG014621 // CCG014620 // CCG016610 // CCG023718 // CCG004057 // CCG004227 // CCG004093 // CCG009794 // CCG002834 // CCG002199 // CCG004346 // CCG012793 // CCG014314 // CCG010214 // CCG010…
GO:0080044	F	quercetin 7-O-glucosyltransferase activity	30	2019	180	23397	0.0004	0.018	// CCG025588 // CCG005403 // CCG025277 // CCG025275 // CCG018351 // CCG008700 // CCG014719 // CCG006985 // CCG006984 // CCG004265 // CCG027515 // CCG027514 // CCG014735 // CCG014732 // CCG027513 // CCG008699 // CCG026007 // CCG021145 // CCG027220 // CCG022246 // CCG021246 // CCG011971 // CCG024360 // CCG019329 // CCG010792 // CCG015562 // CCG014069 // CCG014063 // CCG001277 // CCG006974
GO:0080043	F	quercetin 3-O-glucosyltransferase activity	30	2019	180	23397	0.0004	0.018	// CCG025588 // CCG005403 // CCG025277 // CCG025275 // CCG018351 // CCG008700 // CCG014719 // CCG006985 // CCG006984 // CCG004265 // CCG027515 // CCG027514 // CCG014735 // CCG014732 // CCG027513 // CCG008699 // CCG026007 // CCG021145 // CCG027220 // CCG022246 // CCG021246 // CCG011971 // CCG024360 // CCG019329 // CCG010792 // CCG015562 // CCG014069 // CCG014063 // CCG001277 // CCG006974
GO:0004714	F	transmembrane receptor protein tyrosine kinase activity	19	2019	95	23397	0.00046	0.02	// CCG014135 // CCG004150 // CCG012848 // CCG008321 // CCG025450 // CCG014133 // CCG002122 // CCG007157 // CCG014154 // CCG017571 // CCG014626 // CCG014625 // CCG001697 // CCG008322 // CCG010690 // CCG014624 // CCG010775 // CCG022991 // CCG009256
GO:0090484	F	drug transporter activity	18	2019	89	23397	0.00055	0.023	// CCG001564 // CCG028344 // CCG026524 // CCG021888 // CCG028145 // CCG008292 // CCG010599 // CCG015461 // CCG002002 // CCG019849 // CCG001823 // CCG016291 // CCG006505 // CCG009064 // CCG008889 // CCG020965 // CCG006605 // CCG024008
GO:0015238	F	drug transmembrane transporter activity	18	2019	89	23397	0.00055	0.023	// CCG001564 // CCG028344 // CCG026524 // CCG021888 // CCG028145 // CCG008292 // CCG010599 // CCG015461 // CCG002002 // CCG019849 // CCG001823 // CCG016291 // CCG006505 // CCG009064 // CCG008889 // CCG020965 // CCG006605 // CCG024008
GO:0005506	F	iron ion binding	62	2019	469	23397	0.00065	0.026	// CCG008411 // CCG013355 // CCG021953 // CCG009439 // CCG001458 // CCG025722 // CCG012289 // CCG028164 // CCG018160 // CCG009303 // CCG007614 // CCG008662 // CCG011917 // CCG014039 // CCG000671 // CCG007613 // CCG025129 // CCG007228 // CCG014777 // CCG008984 // CCG007412 // CCG006589 // CCG007723 // CCG001423 // CCG013241 // CCG012290 // CCG009000 // CCG001426 // CCG015201 // CCG016618 // CCG028…
GO:0016740	F	transferase activity	537	2019	5369	23397	0.0009	0.035	// CCG010249 // CCG013585 // CCG020220 // CCG013412 // CCG018180 // CCG011804 // CCG004058 // CCG022798 // CCG007492 // CCG006997 // CCG003101 // CCG010016 // CCG001870 // CCG005637 // CCG017912 // CCG021391 // CCG029372 // CCG017495 // CCG012982 // CCG012983 // CCG004574 // CCG020921 // CCG028309 // CCG026423 // CCG026782 // CCG028304 // CCG019272 // CCG021404 // CCG021400 // CCG009737 // CCG021…
GO:0005388	F	calcium-transporting ATPase activity	10	2019	37	23397	0.00091	0.035	// CCG005018 // CCG005016 // CCG007300 // CCG010082 // CCG025835 // CCG010075 // CCG010076 // CCG005523 // CCG025836 // CCG004177
GO:0032440	F	2-alkenal reductase [NAD(P)] activity	47	2019	340	23397	0.0011	0.04	// CCG028202 // CCG010161 // CCG013585 // CCG020072 // CCG020070 // CCG021493 // CCG026782 // CCG004031 // CCG000679 // CCG007196 // CCG023916 // CCG028943 // CCG028941 // CCG000577 // CCG003118 // CCG016402 // CCG008006 // CCG025332 // CCG005973 // CCG013190 // CCG028111 // CCG026770 // CCG029226 // CCG011780 // CCG026925 // CCG029122 // CCG023647 // CCG012627 // CCG028236 // CCG000282 // CCG025…
GO:0016791	F	phosphatase activity	56	2019	423	23397	0.0011	0.041	// CCG024990 // CCG012645 // CCG027769 // CCG014278 // CCG020243 // CCG020072 // CCG020070 // CCG012648 // CCG000276 // CCG004224 // CCG008497 // CCG019644 // CCG024192 // CCG004655 // CCG023238 // CCG004019 // CCG014446 // CCG013527 // CCG017023 // CCG011820 // CCG027528 // CCG024812 // CCG003173 // CCG023978 // CCG009819 // CCG007841 // CCG006274 // CCG002949 // CCG007046 // CCG008974 // CCG001…
GO:0000989	F	transcription factor activity, transcription factor binding	39	2019	271	23397	0.0013	0.046	// CCG019253 // CCG022748 // CCG028301 // CCG011090 // CCG024164 // CCG024148 // CCG011910 // CCG005163 // CCG003975 // CCG025233 // CCG021684 // CCG014621 // CCG014620 // CCG016610 // CCG023718 // CCG029549 // CCG004093 // CCG009794 // CCG002834 // CCG004346 // CCG012793 // CCG028674 // CCG014314 // CCG029145 // CCG016611 // CCG011536 // CCG018070 // CCG002353 // CCG027975 // CCG012589 // CCG026…
GO:0016709	F	oxidoreductase activity, acting on paired donors, with incorporation or reduction of molecular oxygen, NAD(P)H as one donor, and incorporation of one atom of oxygen	38	2019	264	23397	0.0014	0.05	// CCG008411 // CCG009000 // CCG001458 // CCG026399 // CCG006039 // CCG017649 // CCG012289 // CCG028164 // CCG009303 // CCG007614 // CCG008662 // CCG014039 // CCG000671 // CCG007613 // CCG015201 // CCG006589 // CCG012290 // CCG011603 // CCG025129 // CCG013355 // CCG028653 // CCG012062 // CCG013094 // CCG003678 // CCG028356 // CCG028354 // CCG008814 // CCG010036 // CCG012291 // CCG000529 // CCG006…
GO:0016707	F	gibberellin 3-beta-dioxygenase activity	7	2019	21	23397	0.0014	0.05	// CCG026084 // CCG003044 // CCG000551 // CCG001568 // CCG011539 // CCG018302 // CCG024643
GO:0000988	F	transcription factor activity, protein binding	40	2019	282	23397	0.0015	0.05	// CCG019253 // CCG022748 // CCG028301 // CCG011090 // CCG024164 // CCG024148 // CCG011910 // CCG005163 // CCG003975 // CCG025233 // CCG021684 // CCG014621 // CCG014620 // CCG016610 // CCG023718 // CCG029549 // CCG004093 // CCG009794 // CCG002834 // CCG004346 // CCG012793 // CCG028674 // CCG014314 // CCG029145 // CCG016611 // CCG011536 // CCG018070 // CCG002353 // CCG027975 // CCG012589 // CCG026…
GO:0008378	F	galactosyltransferase activity	11	2019	46	23397	0.0015	0.052	// CCG014425 // CCG005661 // CCG027111 // CCG022444 // CCG011817 // CCG023133 // CCG024491 // CCG003710 // CCG028495 // CCG010994 // CCG010993
GO:0038023	F	signaling receptor activity	45	2019	328	23397	0.0015	0.052	// CCG001770 // CCG010249 // CCG002122 // CCG000594 // CCG002788 // CCG007610 // CCG009614 // CCG014625 // CCG014624 // CCG027655 // CCG014626 // CCG016677 // CCG014135 // CCG004150 // CCG014133 // CCG014154 // CCG009055 // CCG001157 // CCG007590 // CCG027659 // CCG027656 // CCG012848 // CCG001651 // CCG027654 // CCG010499 // CCG008566 // CCG025304 // CCG005865 // CCG025730 // CCG010690 // CCG024…
GO:0016758	F	transferase activity, transferring hexosyl groups	71	2019	573	23397	0.0017	0.054	// CCG028309 // CCG025588 // CCG005404 // CCG015169 // CCG013913 // CCG005403 // CCG025277 // CCG025275 // CCG018351 // CCG003798 // CCG007046 // CCG017963 // CCG018332 // CCG008700 // CCG004057 // CCG014425 // CCG006984 // CCG006983 // CCG004265 // CCG005661 // CCG027513 // CCG027515 // CCG016792 // CCG014735 // CCG025019 // CCG027829 // CCG014732 // CCG018955 // CCG004058 // CCG023133 // CCG027…
GO:0042578	F	phosphoric ester hydrolase activity	63	2019	497	23397	0.0017	0.054	// CCG024990 // CCG012645 // CCG027769 // CCG014278 // CCG020243 // CCG020072 // CCG020070 // CCG012648 // CCG000276 // CCG004224 // CCG008497 // CCG019644 // CCG002949 // CCG023474 // CCG024192 // CCG004655 // CCG023238 // CCG004019 // CCG014446 // CCG013527 // CCG017023 // CCG011820 // CCG001120 // CCG029421 // CCG024812 // CCG003173 // CCG023978 // CCG007694 // CCG009819 // CCG007841 // CCG003…
GO:0016627	F	oxidoreductase activity, acting on the CH-CH group of donors	65	2019	517	23397	0.0018	0.056	// CCG028202 // CCG009677 // CCG014319 // CCG014318 // CCG010161 // CCG013585 // CCG020072 // CCG020070 // CCG020248 // CCG009676 // CCG016402 // CCG001426 // CCG021493 // CCG026782 // CCG019029 // CCG004031 // CCG000679 // CCG007196 // CCG013505 // CCG007723 // CCG028943 // CCG026346 // CCG028941 // CCG000577 // CCG003118 // CCG000232 // CCG008006 // CCG028448 // CCG024927 // CCG025332 // CCG005…
GO:0016628	F	oxidoreductase activity, acting on the CH-CH group of donors, NAD or NADP as acceptor	52	2019	397	23397	0.002	0.062	// CCG028202 // CCG010161 // CCG013585 // CCG020072 // CCG020070 // CCG020248 // CCG016402 // CCG021493 // CCG026782 // CCG004031 // CCG000679 // CCG007196 // CCG023916 // CCG028943 // CCG026346 // CCG028941 // CCG000577 // CCG003118 // CCG000232 // CCG008006 // CCG025332 // CCG005973 // CCG013190 // CCG028111 // CCG026770 // CCG029226 // CCG011780 // CCG026925 // CCG029122 // CCG023647 // CCG012…
GO:0060089	F	molecular transducer activity	45	2019	336	23397	0.0025	0.074	// CCG001770 // CCG010249 // CCG002122 // CCG000594 // CCG002788 // CCG007610 // CCG009614 // CCG014625 // CCG014624 // CCG027655 // CCG014626 // CCG016677 // CCG014135 // CCG004150 // CCG014133 // CCG014154 // CCG009055 // CCG001157 // CCG007590 // CCG027659 // CCG027656 // CCG012848 // CCG001651 // CCG027654 // CCG010499 // CCG008566 // CCG025304 // CCG005865 // CCG025730 // CCG010690 // CCG024…
GO:0043531	F	ADP binding	49	2019	373	23397	0.0025	0.074	// CCG002784 // CCG005599 // CCG006035 // CCG014922 // CCG013761 // CCG002083 // CCG014923 // CCG009471 // CCG019589 // CCG021327 // CCG022219 // CCG009503 // CCG017482 // CCG017023 // CCG011820 // CCG015820 // CCG016116 // CCG016119 // CCG014926 // CCG022371 // CCG020685 // CCG010705 // CCG013848 // CCG013849 // CCG009299 // CCG009295 // CCG013093 // CCG013132 // CCG011785 // CCG013805 // CCG013…
GO:0004872	F	receptor activity	45	2019	336	23397	0.0025	0.074	// CCG001770 // CCG010249 // CCG002122 // CCG000594 // CCG002788 // CCG007610 // CCG009614 // CCG014625 // CCG014624 // CCG027655 // CCG014626 // CCG016677 // CCG014135 // CCG004150 // CCG014133 // CCG014154 // CCG009055 // CCG001157 // CCG007590 // CCG027659 // CCG027656 // CCG012848 // CCG001651 // CCG027654 // CCG010499 // CCG008566 // CCG025304 // CCG005865 // CCG025730 // CCG010690 // CCG024…
GO:0004805	F	trehalose-phosphatase activity	6	2019	18	23397	0.0031	0.091	// CCG009819 // CCG007046 // CCG008974 // CCG001389 // CCG024192 // CCG027554
GO:0016634	F	oxidoreductase activity, acting on the CH-CH group of donors, oxygen as acceptor	9	2019	37	23397	0.0036	0.1	// CCG013505 // CCG007723 // CCG014319 // CCG014318 // CCG001423 // CCG028448 // CCG001426 // CCG024927 // CCG028918
GO:0032559	F	adenyl ribonucleotide binding	344	2019	3461	23397	0.0067	0.19	// CCG010249 // CCG011804 // CCG002490 // CCG022798 // CCG012678 // CCG013093 // CCG013805 // CCG013806 // CCG010016 // CCG016667 // CCG029372 // CCG012982 // CCG012983 // CCG017712 // CCG010082 // CCG012386 // CCG026427 // CCG026782 // CCG028304 // CCG019272 // CCG021404 // CCG021400 // CCG021402 // CCG000577 // CCG013964 // CCG000814 // CCG018257 // CCG024763 // CCG009256 // CCG005018 // CCG005…
GO:0035251	F	UDP-glucosyltransferase activity	38	2019	289	23397	0.0067	0.19	// CCG025588 // CCG015169 // CCG005403 // CCG025277 // CCG025275 // CCG018351 // CCG018332 // CCG008700 // CCG004057 // CCG006985 // CCG006984 // CCG004265 // CCG027515 // CCG027514 // CCG014735 // CCG025019 // CCG014732 // CCG027513 // CCG007046 // CCG008699 // CCG026007 // CCG021145 // CCG027220 // CCG022246 // CCG021246 // CCG011971 // CCG024360 // CCG013412 // CCG013411 // CCG014719 // CCG019…
GO:0008146	F	sulfotransferase activity	5	2019	15	23397	0.0069	0.19	// CCG027397 // CCG010123 // CCG020220 // CCG012052 // CCG000099
GO:0030554	F	adenyl nucleotide binding	344	2019	3465	23397	0.0071	0.19	// CCG010249 // CCG011804 // CCG002490 // CCG022798 // CCG012678 // CCG013093 // CCG013805 // CCG013806 // CCG010016 // CCG016667 // CCG029372 // CCG012982 // CCG012983 // CCG017712 // CCG010082 // CCG012386 // CCG026427 // CCG026782 // CCG028304 // CCG019272 // CCG021404 // CCG021400 // CCG021402 // CCG000577 // CCG013964 // CCG000814 // CCG018257 // CCG024763 // CCG009256 // CCG005018 // CCG005…
GO:0016762	F	xyloglucan:xyloglucosyl transferase activity	8	2019	34	23397	0.0073	0.2	// CCG022154 // CCG023900 // CCG016792 // CCG027829 // CCG004058 // CCG017555 // CCG017552 // CCG017963
GO:0016757	F	transferase activity, transferring glycosyl groups	89	2019	792	23397	0.0078	0.21	// CCG015169 // CCG017906 // CCG027513 // CCG008700 // CCG004057 // CCG022154 // CCG011971 // CCG016792 // CCG027829 // CCG007046 // CCG023133 // CCG010577 // CCG022246 // CCG017912 // CCG010792 // CCG017495 // CCG017555 // CCG017552 // CCG028760 // CCG028309 // CCG025277 // CCG025275 // CCG006520 // CCG014719 // CCG025773 // CCG021246 // CCG029738 // CCG024360 // CCG028495 // CCG015562 // CCG007…
GO:0046527	F	glucosyltransferase activity	39	2019	305	23397	0.0095	0.25	// CCG025588 // CCG015169 // CCG005403 // CCG025277 // CCG025275 // CCG018351 // CCG018332 // CCG008700 // CCG004057 // CCG006985 // CCG006984 // CCG004265 // CCG027515 // CCG027514 // CCG014735 // CCG025019 // CCG014732 // CCG027513 // CCG007046 // CCG008699 // CCG026007 // CCG021145 // CCG027220 // CCG022246 // CCG021246 // CCG011971 // CCG024360 // CCG013412 // CCG013411 // CCG014719 // CCG015…
GO:0008509	F	anion transmembrane transporter activity	26	2019	185	23397	0.0097	0.25	// CCG020455 // CCG010029 // CCG013878 // CCG018288 // CCG016631 // CCG024008 // CCG008592 // CCG013873 // CCG015610 // CCG004245 // CCG027266 // CCG005046 // CCG022691 // CCG029206 // CCG010030 // CCG022635 // CCG015289 // CCG020044 // CCG006206 // CCG022634 // CCG013377 // CCG004743 // CCG002002 // CCG007857 // CCG022689 // CCG029157
GO:0003714	F	transcription corepressor activity	6	2019	23	23397	0.012	0.3	// CCG029549 // CCG018070 // CCG026384 // CCG008227 // CCG004723 // CCG000071
GO:0008194	F	UDP-glycosyltransferase activity	48	2019	398	23397	0.013	0.32	// CCG028309 // CCG025588 // CCG015169 // CCG005403 // CCG025277 // CCG025275 // CCG018351 // CCG027513 // CCG018332 // CCG008700 // CCG004057 // CCG006985 // CCG006984 // CCG004265 // CCG005661 // CCG027515 // CCG027514 // CCG014735 // CCG025019 // CCG014732 // CCG018955 // CCG007046 // CCG023133 // CCG027111 // CCG008699 // CCG003710 // CCG026007 // CCG025773 // CCG021145 // CCG027220 // CCG022…
GO:0015291	F	secondary active transmembrane transporter activity	40	2019	321	23397	0.013	0.33	// CCG028344 // CCG026524 // CCG008438 // CCG001636 // CCG028145 // CCG026632 // CCG001823 // CCG014797 // CCG008889 // CCG009619 // CCG006605 // CCG015461 // CCG016291 // CCG006565 // CCG021888 // CCG008292 // CCG015912 // CCG004245 // CCG010599 // CCG005227 // CCG005046 // CCG022691 // CCG029206 // CCG003064 // CCG012968 // CCG023647 // CCG006106 // CCG020044 // CCG021415 // CCG014555 // CCG017…
GO:0008519	F	ammonium transmembrane transporter activity	5	2019	18	23397	0.016	0.39	// CCG014860 // CCG012528 // CCG029253 // CCG012438 // CCG008458
GO:0015662	F	ATPase activity, coupled to transmembrane movement of ions, phosphorylative mechanism	11	2019	63	23397	0.018	0.45	// CCG005018 // CCG005016 // CCG007300 // CCG016051 // CCG010082 // CCG025835 // CCG010075 // CCG010076 // CCG005523 // CCG025836 // CCG004177
GO:0005516	F	calmodulin binding	19	2019	135	23397	0.024	0.57	// CCG016982 // CCG020398 // CCG020513 // CCG022743 // CCG028310 // CCG006950 // CCG012139 // CCG007300 // CCG006360 // CCG004835 // CCG012678 // CCG027930 // CCG005911 // CCG000337 // CCG003890 // CCG020438 // CCG011536 // CCG028493 // CCG004177
GO:0015297	F	antiporter activity	23	2019	172	23397	0.024	0.58	// CCG028344 // CCG026524 // CCG008438 // CCG001636 // CCG028145 // CCG026632 // CCG001823 // CCG006505 // CCG008889 // CCG009619 // CCG015461 // CCG016291 // CCG006565 // CCG021888 // CCG008292 // CCG006605 // CCG010599 // CCG005227 // CCG003064 // CCG012968 // CCG021415 // CCG007857 // CCG020965
GO:0016702	F	oxidoreductase activity, acting on single donors with incorporation of molecular oxygen, incorporation of two atoms of oxygen	10	2019	58	23397	0.026	0.61	// CCG017493 // CCG000746 // CCG027496 // CCG003656 // CCG004712 // CCG025606 // CCG013081 // CCG026739 // CCG026750 // CCG004139
GO:0022857	F	transmembrane transporter activity	155	2019	1535	23397	0.029	0.67	// CCG009229 // CCG026524 // CCG020455 // CCG008438 // CCG001636 // CCG025684 // CCG015166 // CCG015289 // CCG005869 // CCG024184 // CCG007650 // CCG007651 // CCG009619 // CCG029349 // CCG015912 // CCG013952 // CCG012626 // CCG005227 // CCG010075 // CCG010076 // CCG013361 // CCG027659 // CCG007196 // CCG009234 // CCG023647 // CCG027656 // CCG027654 // CCG026632 // CCG006106 // CCG020044 // CCG025…
GO:0008447	F	L-ascorbate oxidase activity	5	2019	21	23397	0.03	0.69	// CCG016241 // CCG001199 // CCG004937 // CCG004938 // CCG016240
GO:0015085	F	calcium ion transmembrane transporter activity	11	2019	70	23397	0.037	0.85	// CCG005018 // CCG005016 // CCG026632 // CCG007300 // CCG010082 // CCG025835 // CCG010075 // CCG010076 // CCG005523 // CCG025836 // CCG004177
GO:0004675	F	transmembrane receptor protein serine/threonine kinase activity	21	2019	162	23397	0.041	0.91	// CCG029372 // CCG001770 // CCG010249 // CCG012224 // CCG007590 // CCG017571 // CCG002788 // CCG008566 // CCG025304 // CCG001157 // CCG005865 // CCG009055 // CCG009614 // CCG025730 // CCG009065 // CCG007610 // CCG010775 // CCG010499 // CCG016677 // CCG024788 // CCG028456
GO:0001228	F	transcriptional activator activity, RNA polymerase II transcription regulatory region sequence-specific binding	9	2019	55	23397	0.045	1	// CCG026110 // CCG008414 // CCG009227 // CCG003866 // CCG029454 // CCG010214 // CCG010215 // CCG027290 // CCG010213
GO:0004650	F	polygalacturonase activity	8	2019	47	23397	0.047	1	// CCG013203 // CCG024001 // CCG005376 // CCG004756 // CCG008186 // CCG026556 // CCG019784 // CCG002934
GO:0005102	F	receptor binding	7	2019	39	23397	0.047	1	// CCG000507 // CCG009031 // CCG008835 // CCG008153 // CCG022340 // CCG020647 // CCG027053
GO:0033764	F	steroid dehydrogenase activity, acting on the CH-OH group of donors, NAD or NADP as acceptor	8	2019	47	23397	0.047	1	// CCG018508 // CCG006638 // CCG006636 // CCG008008 // CCG015436 // CCG006643 // CCG029661 // CCG008009
GO:0004364	F	glutathione transferase activity	11	2019	73	23397	0.048	1	// CCG012058 // CCG013822 // CCG013823 // CCG013813 // CCG015479 // CCG022752 // CCG013817 // CCG015480 // CCG015481 // CCG013824 // CCG028658
GO:0022804	F	active transmembrane transporter activity	66	2019	620	23397	0.049	1	// CCG028344 // CCG026524 // CCG008438 // CCG001636 // CCG011312 // CCG024170 // CCG026632 // CCG007300 // CCG025835 // CCG001823 // CCG000019 // CCG014797 // CCG008889 // CCG009619 // CCG006605 // CCG024008 // CCG024009 // CCG001564 // CCG016291 // CCG006565 // CCG010075 // CCG029349 // CCG021888 // CCG008292 // CCG015912 // CCG004245 // CCG016051 // CCG010599 // CCG028145 // CCG027266 // CCG027…
GO:0005886	C	plasma membrane	252	2019	1915	23397	1.7e-10	1e-07	// CCG020455 // CCG010249 // CCG025684 // CCG024349 // CCG011881 // CCG009614 // CCG010691 // CCG007650 // CCG007651 // CCG009619 // CCG017023 // CCG016652 // CCG011973 // CCG023838 // CCG010802 // CCG006035 // CCG014832 // CCG001340 // CCG029182 // CCG003288 // CCG015912 // CCG020438 // CCG022798 // CCG009055 // CCG009299 // CCG022957 // CCG010076 // CCG009295 // CCG005222 // CCG013412 // CCG013…
GO:0071944	C	cell periphery	288	2019	2316	23397	3.1e-09	9.6e-07	// CCG020455 // CCG010249 // CCG025684 // CCG027642 // CCG024349 // CCG011881 // CCG009614 // CCG010691 // CCG007650 // CCG007651 // CCG009619 // CCG017023 // CCG016652 // CCG011973 // CCG022154 // CCG010802 // CCG006035 // CCG014832 // CCG001340 // CCG005419 // CCG029182 // CCG003288 // CCG027829 // CCG015912 // CCG004058 // CCG022798 // CCG009055 // CCG010705 // CCG007500 // CCG020955 // CCG009…
GO:0031226	C	intrinsic component of plasma membrane	53	2019	322	23397	5.4e-06	0.0011	// CCG025684 // CCG007300 // CCG004835 // CCG005869 // CCG001823 // CCG020710 // CCG016734 // CCG017963 // CCG017485 // CCG008458 // CCG016652 // CCG013370 // CCG006565 // CCG010075 // CCG005523 // CCG003349 // CCG004245 // CCG015912 // CCG012678 // CCG006842 // CCG005046 // CCG011453 // CCG004177 // CCG022691 // CCG029206 // CCG003064 // CCG013372 // CCG022386 // CCG022385 // CCG012438 // CCG025…
GO:0044420	C	extracellular matrix component	5	2019	7	23397	8.7e-05	0.0091	// CCG019398 // CCG019399 // CCG019397 // CCG019400 // CCG019401
GO:0009519	C	middle lamella	5	2019	7	23397	8.7e-05	0.0091	// CCG019398 // CCG019399 // CCG019397 // CCG019400 // CCG019401
GO:0009531	C	secondary cell wall	5	2019	7	23397	8.7e-05	0.0091	// CCG019398 // CCG019399 // CCG019397 // CCG019400 // CCG019401
GO:0005887	C	integral component of plasma membrane	36	2019	216	23397	0.00012	0.01	// CCG025684 // CCG007300 // CCG004835 // CCG005869 // CCG016734 // CCG017963 // CCG008458 // CCG013372 // CCG006565 // CCG010075 // CCG004245 // CCG015912 // CCG012678 // CCG006842 // CCG005046 // CCG010076 // CCG004177 // CCG022691 // CCG029206 // CCG003064 // CCG012438 // CCG006106 // CCG020044 // CCG006485 // CCG024349 // CCG025836 // CCG005523 // CCG005018 // CCG010937 // CCG001080 // CCG005…
GO:0044459	C	plasma membrane part	57	2019	401	23397	0.00017	0.013	// CCG025684 // CCG007300 // CCG004835 // CCG005869 // CCG001823 // CCG023944 // CCG020710 // CCG016734 // CCG017963 // CCG017485 // CCG008458 // CCG016652 // CCG013370 // CCG006565 // CCG010075 // CCG005523 // CCG003349 // CCG004245 // CCG015912 // CCG012678 // CCG006842 // CCG005046 // CCG011453 // CCG004177 // CCG022691 // CCG029206 // CCG003064 // CCG013372 // CCG020513 // CCG022386 // CCG022…
GO:0031012	C	extracellular matrix	6	2019	16	23397	0.0016	0.1	// CCG019398 // CCG019399 // CCG017920 // CCG019397 // CCG019400 // CCG019401
GO:0005576	C	extracellular region	81	2019	670	23397	0.0017	0.1	// CCG025728 // CCG012728 // CCG003929 // CCG004938 // CCG020659 // CCG003036 // CCG011231 // CCG027829 // CCG026106 // CCG004937 // CCG027642 // CCG002890 // CCG023508 // CCG002892 // CCG013286 // CCG002894 // CCG016481 // CCG016480 // CCG002899 // CCG010481 // CCG017963 // CCG020660 // CCG010478 // CCG024757 // CCG000125 // CCG000124 // CCG022154 // CCG008153 // CCG005419 // CCG014175 // CCG019…
GO:0031224	C	intrinsic component of membrane	837	2019	8646	23397	0.0019	0.1	// CCG013585 // CCG012914 // CCG020647 // CCG000653 // CCG023526 // CCG023527 // CCG004116 // CCG004115 // CCG014777 // CCG023936 // CCG004057 // CCG008131 // CCG000125 // CCG000124 // CCG000123 // CCG007287 // CCG005419 // CCG013952 // CCG008997 // CCG022798 // CCG005227 // CCG013094 // CCG013093 // CCG005222 // CCG010018 // CCG028276 // CCG009036 // CCG025115 // CCG027442 // CCG003261 // CCG001…
GO:0031225	C	anchored component of membrane	23	2019	139	23397	0.0019	0.1	// CCG020249 // CCG020075 // CCG001823 // CCG020710 // CCG017485 // CCG016652 // CCG013370 // CCG027822 // CCG011453 // CCG027008 // CCG021493 // CCG022386 // CCG022385 // CCG016624 // CCG017656 // CCG024135 // CCG023949 // CCG001895 // CCG003349 // CCG023946 // CCG023944 // CCG004256 // CCG028100
GO:0016021	C	integral component of membrane	831	2019	8607	23397	0.0024	0.12	// CCG013585 // CCG012914 // CCG020647 // CCG000653 // CCG023526 // CCG023527 // CCG004116 // CCG004115 // CCG014777 // CCG023936 // CCG004057 // CCG008131 // CCG000125 // CCG000124 // CCG000123 // CCG007287 // CCG005419 // CCG013952 // CCG008997 // CCG022798 // CCG005227 // CCG013094 // CCG013093 // CCG005222 // CCG010018 // CCG028276 // CCG009036 // CCG025115 // CCG027442 // CCG003261 // CCG001…
GO:0044425	C	membrane part	843	2019	8928	23397	0.012	0.52	// CCG013585 // CCG012914 // CCG020647 // CCG000653 // CCG023526 // CCG023527 // CCG004116 // CCG004115 // CCG014777 // CCG023936 // CCG004057 // CCG008131 // CCG000125 // CCG000124 // CCG000123 // CCG007287 // CCG005419 // CCG019849 // CCG013952 // CCG008997 // CCG022798 // CCG005227 // CCG013094 // CCG013093 // CCG005222 // CCG010018 // CCG028276 // CCG009036 // CCG025115 // CCG027442 // CCG003…
GO:0046658	C	anchored component of plasma membrane	16	2019	105	23397	0.018	0.77	// CCG016652 // CCG017656 // CCG023949 // CCG001895 // CCG022385 // CCG003349 // CCG022386 // CCG023946 // CCG013370 // CCG023944 // CCG001823 // CCG020710 // CCG011453 // CCG028100 // CCG017485 // CCG024135
GO:0016020	C	membrane	912	2019	9912	23397	0.049	1	// CCG010249 // CCG013585 // CCG012914 // CCG020647 // CCG000653 // CCG023526 // CCG023527 // CCG004116 // CCG004115 // CCG014777 // CCG023936 // CCG004057 // CCG008131 // CCG000125 // CCG000124 // CCG000123 // CCG007287 // CCG005419 // CCG019849 // CCG003288 // CCG015912 // CCG013952 // CCG008997 // CCG022798 // CCG005227 // CCG013094 // CCG013093 // CCG005222 // CCG010018 // CCG028276 // CCG009…

## Sheet: Table S4-3
Table S4-3. Hour 6 gene ontology of the differentially expressed genes (DEGs)
GO_acc	term_type	Term	queryitem	querytotal	refitem	reftotal	pvalue	FDR	entries
GO:0071554	P	cell wall organization or biogenesis	161	4834	470	23397	9.7e-12	9e-08	// CCG013954 // CCG000475 // CCG006513 // CCG029179 // CCG000474 // CCG023731 // CCG010968 // CCG014370 // CCG018269 // CCG016441 // CCG023728 // CCG006660 // CCG004057 // CCG025716 // CCG009913 // CCG002580 // CCG016792 // CCG027829 // CCG021847 // CCG004058 // CCG000994 // CCG010767 // CCG020893 // CCG029580 // CCG026804 // CCG027642 // CCG002017 // CCG008811 // CCG022403 // CCG017912 // CCG000…
GO:0055114	P	oxidation-reduction process	741	4834	2859	23397	1.2e-10	5.7e-07	// CCG010161 // CCG020647 // CCG023248 // CCG022649 // CCG023240 // CCG023243 // CCG023245 // CCG023247 // CCG015531 // CCG000125 // CCG005419 // CCG013320 // CCG002509 // CCG013096 // CCG013095 // CCG013094 // CCG024429 // CCG027642 // CCG021260 // CCG022169 // CCG022168 // CCG010959 // CCG022167 // CCG027837 // CCG017883 // CCG016788 // CCG026236 // CCG000650 // CCG029470 // CCG016787 // CCG001…
GO:0019748	P	secondary metabolic process	121	4834	353	23397	2.8e-09	8.6e-06	// CCG009757 // CCG010482 // CCG013817 // CCG013815 // CCG023635 // CCG010481 // CCG010478 // CCG011603 // CCG010470 // CCG010471 // CCG012061 // CCG012060 // CCG005229 // CCG012062 // CCG013096 // CCG013095 // CCG013094 // CCG029773 // CCG006039 // CCG028444 // CCG015547 // CCG008814 // CCG028164 // CCG025597 // CCG023092 // CCG023093 // CCG008893 // CCG022193 // CCG001239 // CCG024853 // CCG014…
GO:0018212	P	peptidyl-tyrosine modification	108	4834	310	23397	6.8e-09	1.3e-05	// CCG010249 // CCG014831 // CCG007966 // CCG007492 // CCG007493 // CCG022793 // CCG007496 // CCG007495 // CCG023400 // CCG005865 // CCG023880 // CCG008719 // CCG022569 // CCG022568 // CCG012982 // CCG012983 // CCG025450 // CCG022801 // CCG001654 // CCG001655 // CCG022572 // CCG012443 // CCG008250 // CCG006059 // CCG023266 // CCG023264 // CCG016677 // CCG014154 // CCG000476 // CCG005241 // CCG017…
GO:0018108	P	peptidyl-tyrosine phosphorylation	108	4834	310	23397	6.8e-09	1.3e-05	// CCG010249 // CCG014831 // CCG007966 // CCG007492 // CCG007493 // CCG022793 // CCG007496 // CCG007495 // CCG023400 // CCG005865 // CCG023880 // CCG008719 // CCG022569 // CCG022568 // CCG012982 // CCG012983 // CCG025450 // CCG022801 // CCG001654 // CCG001655 // CCG022572 // CCG012443 // CCG008250 // CCG006059 // CCG023266 // CCG023264 // CCG016677 // CCG014154 // CCG000476 // CCG005241 // CCG017…
GO:0071555	P	cell wall organization	108	4834	319	23397	3.8e-08	5.9e-05	// CCG013954 // CCG027642 // CCG029179 // CCG023731 // CCG010968 // CCG014370 // CCG018269 // CCG016441 // CCG006660 // CCG004057 // CCG025716 // CCG012993 // CCG002580 // CCG016792 // CCG027829 // CCG021847 // CCG004058 // CCG000994 // CCG010767 // CCG011361 // CCG029580 // CCG022403 // CCG017912 // CCG000339 // CCG023924 // CCG006659 // CCG008145 // CCG014691 // CCG017554 // CCG017552 // CCG013…
GO:0045229	P	external encapsulating structure organization	111	4834	341	23397	2.4e-07	0.00033	// CCG013954 // CCG027642 // CCG029179 // CCG023731 // CCG010968 // CCG014370 // CCG018269 // CCG016441 // CCG006660 // CCG004057 // CCG025716 // CCG012993 // CCG002580 // CCG016792 // CCG027829 // CCG021847 // CCG004058 // CCG000994 // CCG010767 // CCG011361 // CCG029580 // CCG022403 // CCG017912 // CCG000339 // CCG023924 // CCG006659 // CCG008145 // CCG014691 // CCG017554 // CCG017552 // CCG013…
GO:0042744	P	hydrogen peroxide catabolic process	51	4834	130	23397	1.1e-06	0.0013	// CCG020659 // CCG013938 // CCG000339 // CCG000922 // CCG009430 // CCG014691 // CCG027642 // CCG003129 // CCG002895 // CCG002894 // CCG002897 // CCG016480 // CCG002899 // CCG009931 // CCG000125 // CCG003932 // CCG024752 // CCG003934 // CCG002580 // CCG005419 // CCG020952 // CCG027840 // CCG014370 // CCG020955 // CCG020408 // CCG018486 // CCG026105 // CCG026106 // CCG008632 // CCG025012 // CCG007…
GO:0006468	P	protein phosphorylation	436	4834	1720	23397	3.6e-06	0.0038	// CCG010162 // CCG010249 // CCG020347 // CCG020647 // CCG023938 // CCG020226 // CCG017622 // CCG003320 // CCG022798 // CCG007492 // CCG007493 // CCG022793 // CCG007496 // CCG007495 // CCG008811 // CCG014610 // CCG015748 // CCG015740 // CCG029372 // CCG012982 // CCG012983 // CCG027906 // CCG020929 // CCG018924 // CCG026782 // CCG025966 // CCG008250 // CCG019272 // CCG021404 // CCG009324 // CCG009…
GO:0042743	P	hydrogen peroxide metabolic process	52	4834	139	23397	4.6e-06	0.0043	// CCG020659 // CCG013938 // CCG000339 // CCG000922 // CCG009430 // CCG014691 // CCG027642 // CCG003129 // CCG002895 // CCG002894 // CCG002897 // CCG016480 // CCG002899 // CCG009931 // CCG014454 // CCG000125 // CCG003932 // CCG024752 // CCG003934 // CCG002580 // CCG005419 // CCG020952 // CCG027840 // CCG014370 // CCG020955 // CCG020408 // CCG018486 // CCG026105 // CCG026106 // CCG008632 // CCG025…
GO:0044550	P	secondary metabolite biosynthetic process	76	4834	229	23397	7.6e-06	0.0064	// CCG008411 // CCG004746 // CCG009757 // CCG009000 // CCG025597 // CCG006039 // CCG012289 // CCG023635 // CCG017302 // CCG024352 // CCG009716 // CCG013095 // CCG007611 // CCG007613 // CCG004842 // CCG009719 // CCG011597 // CCG012235 // CCG006589 // CCG002623 // CCG010036 // CCG011603 // CCG006583 // CCG005419 // CCG012291 // CCG020955 // CCG006584 // CCG015547 // CCG001242 // CCG028653 // CCG012…
GO:0071669	P	plant-type cell wall organization or biogenesis	60	4834	176	23397	2.6e-05	0.017	// CCG013954 // CCG005163 // CCG000903 // CCG006513 // CCG000904 // CCG009430 // CCG027589 // CCG027642 // CCG013409 // CCG014370 // CCG018269 // CCG015551 // CCG015552 // CCG017963 // CCG000339 // CCG004057 // CCG025716 // CCG009913 // CCG002580 // CCG004097 // CCG027840 // CCG005686 // CCG020408 // CCG010767 // CCG020921 // CCG020893 // CCG018486 // CCG029580 // CCG001917 // CCG001269 // CCG001…
GO:0006855	P	drug transmembrane transport	35	4834	87	23397	2.6e-05	0.017	// CCG028344 // CCG008292 // CCG014881 // CCG014882 // CCG028145 // CCG001823 // CCG001822 // CCG024778 // CCG008451 // CCG006605 // CCG024008 // CCG009915 // CCG009914 // CCG016291 // CCG021888 // CCG028342 // CCG015144 // CCG008294 // CCG015461 // CCG010599 // CCG028394 // CCG007593 // CCG023810 // CCG000818 // CCG009064 // CCG017655 // CCG014709 // CCG012205 // CCG012228 // CCG001999 // CCG009…
GO:0015893	P	drug transport	35	4834	87	23397	2.6e-05	0.017	// CCG028344 // CCG008292 // CCG014881 // CCG014882 // CCG028145 // CCG001823 // CCG001822 // CCG024778 // CCG008451 // CCG006605 // CCG024008 // CCG009915 // CCG009914 // CCG016291 // CCG021888 // CCG028342 // CCG015144 // CCG008294 // CCG015461 // CCG010599 // CCG028394 // CCG007593 // CCG023810 // CCG000818 // CCG009064 // CCG017655 // CCG014709 // CCG012205 // CCG012228 // CCG001999 // CCG009…
GO:0009813	P	flavonoid biosynthetic process	32	4834	77	23397	2.7e-05	0.017	// CCG012130 // CCG018015 // CCG023635 // CCG023716 // CCG026875 // CCG009345 // CCG000218 // CCG012129 // CCG012125 // CCG012126 // CCG012127 // CCG027277 // CCG014856 // CCG024429 // CCG023407 // CCG011329 // CCG023409 // CCG023408 // CCG020979 // CCG004841 // CCG004842 // CCG018016 // CCG006513 // CCG008997 // CCG023922 // CCG008320 // CCG003821 // CCG027872 // CCG005659 // CCG017302 // CCG015…
GO:0006979	P	response to oxidative stress	93	4834	303	23397	2.9e-05	0.017	// CCG008821 // CCG026915 // CCG000922 // CCG004818 // CCG014370 // CCG027840 // CCG000125 // CCG005349 // CCG002580 // CCG005419 // CCG020952 // CCG020955 // CCG027642 // CCG023642 // CCG015503 // CCG000339 // CCG023924 // CCG017919 // CCG028494 // CCG006950 // CCG024748 // CCG026728 // CCG024912 // CCG029399 // CCG028783 // CCG009430 // CCG014691 // CCG002895 // CCG002894 // CCG002897 // CCG002…
GO:0008202	P	steroid metabolic process	51	4834	145	23397	4e-05	0.021	// CCG024890 // CCG000928 // CCG005836 // CCG025866 // CCG025722 // CCG020248 // CCG006644 // CCG015473 // CCG016618 // CCG009938 // CCG025310 // CCG000671 // CCG006643 // CCG009360 // CCG023208 // CCG015268 // CCG017606 // CCG028511 // CCG021953 // CCG025129 // CCG013545 // CCG013544 // CCG015448 // CCG002396 // CCG008043 // CCG029583 // CCG019743 // CCG010959 // CCG000819 // CCG009577 // CCG007…
GO:0044710	P	single-organism metabolic process	1226	4834	5299	23397	4.1e-05	0.021	// CCG016409 // CCG010162 // CCG028938 // CCG027491 // CCG010161 // CCG025597 // CCG013584 // CCG023220 // CCG020647 // CCG023248 // CCG022649 // CCG017622 // CCG023240 // CCG023243 // CCG023245 // CCG016241 // CCG023247 // CCG015531 // CCG012290 // CCG005411 // CCG000125 // CCG005419 // CCG027994 // CCG008997 // CCG009912 // CCG005229 // CCG010767 // CCG013096 // CCG013095 // CCG025309 // CCG020…
GO:0009812	P	flavonoid metabolic process	33	4834	82	23397	4.4e-05	0.021	// CCG012130 // CCG018015 // CCG023635 // CCG023716 // CCG026875 // CCG009345 // CCG023810 // CCG000218 // CCG012129 // CCG012125 // CCG012126 // CCG012127 // CCG027277 // CCG014856 // CCG024429 // CCG023407 // CCG011329 // CCG023409 // CCG023408 // CCG020979 // CCG004841 // CCG004842 // CCG018016 // CCG006513 // CCG008997 // CCG023922 // CCG008320 // CCG003821 // CCG027872 // CCG005659 // CCG017…
GO:0008037	P	cell recognition	45	4834	125	23397	5.7e-05	0.025	// CCG022535 // CCG016093 // CCG019061 // CCG019063 // CCG021404 // CCG021400 // CCG021402 // CCG014625 // CCG014626 // CCG010907 // CCG004152 // CCG016290 // CCG014133 // CCG014640 // CCG001340 // CCG000816 // CCG014154 // CCG001344 // CCG010450 // CCG019459 // CCG000082 // CCG000083 // CCG026245 // CCG018979 // CCG019455 // CCG021399 // CCG021398 // CCG000815 // CCG000814 // CCG018980 // CCG004…
GO:0048544	P	recognition of pollen	45	4834	125	23397	5.7e-05	0.025	// CCG022535 // CCG016093 // CCG019061 // CCG019063 // CCG021404 // CCG021400 // CCG021402 // CCG014625 // CCG014626 // CCG010907 // CCG004152 // CCG016290 // CCG014133 // CCG014640 // CCG001340 // CCG000816 // CCG014154 // CCG001344 // CCG010450 // CCG019459 // CCG000082 // CCG000083 // CCG026245 // CCG018979 // CCG019455 // CCG021399 // CCG021398 // CCG000815 // CCG000814 // CCG018980 // CCG004…
GO:0000186	P	activation of MAPKK activity	56	4834	166	23397	6.5e-05	0.028	// CCG010697 // CCG010162 // CCG001770 // CCG026782 // CCG022572 // CCG006513 // CCG025966 // CCG028304 // CCG022789 // CCG019272 // CCG021404 // CCG010691 // CCG005973 // CCG015764 // CCG014831 // CCG027849 // CCG027848 // CCG027861 // CCG027845 // CCG024864 // CCG016402 // CCG021399 // CCG002013 // CCG005241 // CCG007989 // CCG022568 // CCG018979 // CCG020347 // CCG022797 // CCG029122 // CCG025…
GO:0042546	P	cell wall biogenesis	56	4834	167	23397	7.9e-05	0.031	// CCG029138 // CCG013954 // CCG018228 // CCG029057 // CCG027829 // CCG000903 // CCG006513 // CCG000904 // CCG008744 // CCG013409 // CCG005163 // CCG018269 // CCG015551 // CCG015552 // CCG017963 // CCG016441 // CCG010780 // CCG025716 // CCG012993 // CCG016792 // CCG004097 // CCG014649 // CCG004058 // CCG021847 // CCG002396 // CCG010767 // CCG017552 // CCG020893 // CCG029580 // CCG001269 // CCG026…
GO:0010200	P	response to chitin	16	4834	30	23397	8e-05	0.031	// CCG008832 // CCG025009 // CCG025505 // CCG007308 // CCG010222 // CCG000383 // CCG000384 // CCG029041 // CCG024768 // CCG007795 // CCG015908 // CCG015907 // CCG004171 // CCG010775 // CCG007648 // CCG004828
GO:0043410	P	positive regulation of MAPK cascade	56	4834	170	23397	0.00013	0.048	// CCG010697 // CCG010162 // CCG001770 // CCG026782 // CCG022572 // CCG006513 // CCG025966 // CCG028304 // CCG022789 // CCG019272 // CCG021404 // CCG010691 // CCG005973 // CCG015764 // CCG014831 // CCG027849 // CCG027848 // CCG027861 // CCG027845 // CCG024864 // CCG016402 // CCG021399 // CCG002013 // CCG005241 // CCG007989 // CCG022568 // CCG018979 // CCG020347 // CCG022797 // CCG029122 // CCG025…
GO:0072593	P	reactive oxygen species metabolic process	61	4834	189	23397	0.00013	0.048	// CCG004818 // CCG020659 // CCG013938 // CCG000339 // CCG000922 // CCG009430 // CCG014691 // CCG027642 // CCG003129 // CCG002895 // CCG002894 // CCG002897 // CCG016480 // CCG002899 // CCG023855 // CCG009931 // CCG020660 // CCG000125 // CCG003932 // CCG024752 // CCG003934 // CCG002580 // CCG005419 // CCG020952 // CCG027840 // CCG014370 // CCG020955 // CCG020408 // CCG018486 // CCG026105 // CCG026…
GO:0044036	P	cell wall macromolecule metabolic process	42	4834	119	23397	0.00016	0.051	// CCG029138 // CCG015021 // CCG008744 // CCG016441 // CCG017963 // CCG023728 // CCG018228 // CCG017884 // CCG012993 // CCG016792 // CCG027829 // CCG014649 // CCG004058 // CCG002011 // CCG007840 // CCG021847 // CCG002017 // CCG020921 // CCG029580 // CCG026804 // CCG016815 // CCG004295 // CCG016491 // CCG009216 // CCG009217 // CCG006329 // CCG009215 // CCG000351 // CCG028866 // CCG019674 // CCG026…
GO:0043405	P	regulation of MAP kinase activity	56	4834	171	23397	0.00016	0.051	// CCG010697 // CCG010162 // CCG001770 // CCG026782 // CCG022572 // CCG006513 // CCG025966 // CCG028304 // CCG022789 // CCG019272 // CCG021404 // CCG010691 // CCG005973 // CCG015764 // CCG014831 // CCG027849 // CCG027848 // CCG027861 // CCG027845 // CCG024864 // CCG016402 // CCG021399 // CCG002013 // CCG005241 // CCG007989 // CCG022568 // CCG018979 // CCG020347 // CCG022797 // CCG029122 // CCG025…
GO:0048878	P	chemical homeostasis	91	4834	308	23397	0.00016	0.051	// CCG025129 // CCG025127 // CCG019046 // CCG023733 // CCG013313 // CCG007651 // CCG026815 // CCG023831 // CCG005228 // CCG005227 // CCG004214 // CCG001971 // CCG015473 // CCG020404 // CCG006348 // CCG022009 // CCG028283 // CCG002992 // CCG003599 // CCG012766 // CCG001336 // CCG016618 // CCG012768 // CCG005128 // CCG012830 // CCG000671 // CCG015268 // CCG004240 // CCG015670 // CCG022974 // CCG023…
GO:0009875	P	pollen-pistil interaction	45	4834	130	23397	0.00016	0.051	// CCG022535 // CCG016093 // CCG019061 // CCG019063 // CCG021404 // CCG021400 // CCG021402 // CCG014625 // CCG014626 // CCG010907 // CCG004152 // CCG016290 // CCG014133 // CCG014640 // CCG001340 // CCG000816 // CCG014154 // CCG001344 // CCG010450 // CCG019459 // CCG000082 // CCG000083 // CCG026245 // CCG018979 // CCG019455 // CCG021399 // CCG021398 // CCG000815 // CCG000814 // CCG018980 // CCG004…
GO:0042493	P	response to drug	36	4834	98	23397	0.00019	0.056	// CCG028344 // CCG008292 // CCG014881 // CCG014882 // CCG028145 // CCG001823 // CCG001822 // CCG024778 // CCG008451 // CCG006605 // CCG024008 // CCG009915 // CCG009914 // CCG016291 // CCG021888 // CCG028342 // CCG015144 // CCG008294 // CCG015461 // CCG010599 // CCG028394 // CCG007593 // CCG023810 // CCG000818 // CCG020647 // CCG017655 // CCG014709 // CCG012205 // CCG012228 // CCG001999 // CCG009…
GO:0016998	P	cell wall macromolecule catabolic process	11	4834	18	23397	0.00022	0.063	// CCG016815 // CCG009217 // CCG004295 // CCG016491 // CCG013189 // CCG002011 // CCG007840 // CCG009215 // CCG009216 // CCG002017 // CCG027278
GO:0098869	P	cellular oxidant detoxification	74	4834	244	23397	0.00026	0.069	// CCG029399 // CCG025022 // CCG004818 // CCG020659 // CCG008824 // CCG009436 // CCG000339 // CCG000922 // CCG009430 // CCG024748 // CCG027642 // CCG003129 // CCG002895 // CCG002894 // CCG002897 // CCG016480 // CCG002899 // CCG009931 // CCG020660 // CCG000125 // CCG003932 // CCG024752 // CCG003934 // CCG002580 // CCG024806 // CCG005419 // CCG027865 // CCG020952 // CCG027840 // CCG013938 // CCG014…
GO:1990748	P	cellular detoxification	74	4834	244	23397	0.00026	0.069	// CCG029399 // CCG025022 // CCG004818 // CCG020659 // CCG008824 // CCG009436 // CCG000339 // CCG000922 // CCG009430 // CCG024748 // CCG027642 // CCG003129 // CCG002895 // CCG002894 // CCG002897 // CCG016480 // CCG002899 // CCG009931 // CCG020660 // CCG000125 // CCG003932 // CCG024752 // CCG003934 // CCG002580 // CCG024806 // CCG005419 // CCG027865 // CCG020952 // CCG027840 // CCG013938 // CCG014…
GO:0016310	P	phosphorylation	555	4834	2333	23397	0.00026	0.069	// CCG010162 // CCG021211 // CCG010249 // CCG020347 // CCG020647 // CCG023938 // CCG020226 // CCG017622 // CCG007060 // CCG003320 // CCG022798 // CCG007492 // CCG007493 // CCG022793 // CCG007496 // CCG007495 // CCG003101 // CCG008811 // CCG003265 // CCG005637 // CCG014610 // CCG015748 // CCG015740 // CCG029372 // CCG012982 // CCG012983 // CCG004892 // CCG027906 // CCG017981 // CCG018924 // CCG016…
GO:0006928	P	movement of cell or subcellular component	34	4834	93	23397	0.00031	0.08	// CCG000755 // CCG001961 // CCG014198 // CCG000869 // CCG022236 // CCG018269 // CCG019826 // CCG027014 // CCG013015 // CCG029460 // CCG002427 // CCG023793 // CCG007519 // CCG028291 // CCG019434 // CCG002507 // CCG001745 // CCG021822 // CCG001853 // CCG003008 // CCG003486 // CCG027205 // CCG009742 // CCG001305 // CCG005808 // CCG028314 // CCG004127 // CCG003007 // CCG022733 // CCG025092 // CCG026…
GO:0071900	P	regulation of protein serine/threonine kinase activity	61	4834	195	23397	0.00034	0.086	// CCG010697 // CCG002045 // CCG010162 // CCG001770 // CCG026782 // CCG022572 // CCG006513 // CCG025966 // CCG028304 // CCG022789 // CCG019272 // CCG021404 // CCG010691 // CCG005973 // CCG015764 // CCG014831 // CCG027849 // CCG027848 // CCG027861 // CCG027845 // CCG024864 // CCG016402 // CCG021399 // CCG002013 // CCG005241 // CCG007989 // CCG022568 // CCG018979 // CCG020347 // CCG022797 // CCG010…
GO:0007018	P	microtubule-based movement	31	4834	83	23397	0.00036	0.089	// CCG000755 // CCG001961 // CCG014198 // CCG000869 // CCG022236 // CCG018269 // CCG019826 // CCG027014 // CCG013015 // CCG029460 // CCG002427 // CCG023793 // CCG007519 // CCG028291 // CCG019434 // CCG002507 // CCG001745 // CCG021822 // CCG001853 // CCG003486 // CCG027205 // CCG001305 // CCG005808 // CCG028314 // CCG004127 // CCG022733 // CCG025092 // CCG026408 // CCG028539 // CCG013086 // CCG028…
GO:0098754	P	detoxification	75	4834	253	23397	0.00049	0.12	// CCG029399 // CCG025022 // CCG004818 // CCG020659 // CCG008824 // CCG009436 // CCG000339 // CCG000922 // CCG009430 // CCG024748 // CCG027642 // CCG003129 // CCG002895 // CCG002894 // CCG002897 // CCG016480 // CCG002899 // CCG009931 // CCG020660 // CCG000125 // CCG003932 // CCG024752 // CCG003934 // CCG002580 // CCG024806 // CCG005419 // CCG027865 // CCG020952 // CCG027840 // CCG013938 // CCG014…
GO:0009611	P	response to wounding	26	4834	67	23397	0.00053	0.12	// CCG005659 // CCG009654 // CCG020248 // CCG009938 // CCG004171 // CCG027294 // CCG006522 // CCG005411 // CCG027450 // CCG027451 // CCG028838 // CCG011597 // CCG000594 // CCG029549 // CCG026384 // CCG008227 // CCG009217 // CCG024133 // CCG004828 // CCG027447 // CCG009942 // CCG024912 // CCG027448 // CCG013215 // CCG004723 // CCG017883
GO:0000165	P	MAPK cascade	62	4834	202	23397	0.00054	0.12	// CCG010697 // CCG010162 // CCG001770 // CCG026782 // CCG022572 // CCG006513 // CCG025966 // CCG028304 // CCG022789 // CCG019272 // CCG007782 // CCG021404 // CCG010691 // CCG005973 // CCG015764 // CCG027294 // CCG021402 // CCG014831 // CCG027849 // CCG027848 // CCG027861 // CCG027845 // CCG024864 // CCG016402 // CCG017674 // CCG021399 // CCG002013 // CCG005241 // CCG007989 // CCG022568 // CCG018…
GO:0032147	P	activation of protein kinase activity	62	4834	203	23397	0.00062	0.14	// CCG021259 // CCG010697 // CCG010162 // CCG001770 // CCG026782 // CCG022572 // CCG006513 // CCG025966 // CCG028304 // CCG022789 // CCG019272 // CCG021404 // CCG020425 // CCG010691 // CCG005973 // CCG015764 // CCG014831 // CCG027849 // CCG027848 // CCG027861 // CCG027845 // CCG024864 // CCG016402 // CCG021399 // CCG002013 // CCG005241 // CCG007989 // CCG006922 // CCG018979 // CCG020347 // CCG022…
GO:1902533	P	positive regulation of intracellular signal transduction	56	4834	180	23397	0.00067	0.15	// CCG010697 // CCG010162 // CCG001770 // CCG026782 // CCG022572 // CCG006513 // CCG025966 // CCG028304 // CCG022789 // CCG019272 // CCG021404 // CCG010691 // CCG005973 // CCG015764 // CCG014831 // CCG027849 // CCG027848 // CCG027861 // CCG027845 // CCG024864 // CCG016402 // CCG021399 // CCG002013 // CCG005241 // CCG007989 // CCG022568 // CCG018979 // CCG020347 // CCG022797 // CCG029122 // CCG025…
GO:0043408	P	regulation of MAPK cascade	57	4834	185	23397	0.00079	0.17	// CCG010697 // CCG010162 // CCG001770 // CCG026782 // CCG022572 // CCG006513 // CCG025966 // CCG028304 // CCG022789 // CCG019272 // CCG021404 // CCG010691 // CCG005973 // CCG015764 // CCG014831 // CCG027849 // CCG027848 // CCG027861 // CCG027845 // CCG024864 // CCG016402 // CCG021399 // CCG002013 // CCG005241 // CCG007989 // CCG022568 // CCG018979 // CCG020347 // CCG022797 // CCG020647 // CCG029…
GO:0001934	P	positive regulation of protein phosphorylation	65	4834	217	23397	0.00082	0.17	// CCG021259 // CCG010697 // CCG010162 // CCG001770 // CCG026782 // CCG022572 // CCG006513 // CCG025966 // CCG028304 // CCG022789 // CCG019272 // CCG021404 // CCG020425 // CCG010691 // CCG005973 // CCG015764 // CCG014831 // CCG027849 // CCG027848 // CCG027861 // CCG015955 // CCG027845 // CCG024864 // CCG016402 // CCG021399 // CCG002013 // CCG005241 // CCG007989 // CCG006922 // CCG018979 // CCG020…
GO:0009636	P	response to toxic substance	78	4834	271	23397	0.001	0.19	// CCG029399 // CCG025022 // CCG004818 // CCG020659 // CCG008824 // CCG009436 // CCG000339 // CCG000922 // CCG009430 // CCG024748 // CCG027642 // CCG003129 // CCG002895 // CCG002894 // CCG002897 // CCG016480 // CCG002899 // CCG009931 // CCG001277 // CCG020660 // CCG000125 // CCG003932 // CCG024752 // CCG003934 // CCG002580 // CCG024806 // CCG005419 // CCG027865 // CCG020952 // CCG027840 // CCG013…
GO:0015706	P	nitrate transport	9	4834	15	23397	0.001	0.19	// CCG000507 // CCG003249 // CCG000508 // CCG016631 // CCG006513 // CCG006206 // CCG029157 // CCG012068 // CCG016184
GO:0098771	P	inorganic ion homeostasis	61	4834	203	23397	0.0011	0.19	// CCG012766 // CCG003497 // CCG029233 // CCG027603 // CCG027602 // CCG025127 // CCG006394 // CCG012768 // CCG025253 // CCG005128 // CCG012830 // CCG009369 // CCG002928 // CCG023474 // CCG013313 // CCG002925 // CCG028870 // CCG028877 // CCG006740 // CCG028406 // CCG028584 // CCG029036 // CCG006271 // CCG029541 // CCG004240 // CCG023831 // CCG022974 // CCG023390 // CCG024098 // CCG005228 // CCG005…
GO:0042327	P	positive regulation of phosphorylation	65	4834	219	23397	0.0011	0.19	// CCG021259 // CCG010697 // CCG010162 // CCG001770 // CCG026782 // CCG022572 // CCG006513 // CCG025966 // CCG028304 // CCG022789 // CCG019272 // CCG021404 // CCG020425 // CCG010691 // CCG005973 // CCG015764 // CCG014831 // CCG027849 // CCG027848 // CCG027861 // CCG015955 // CCG027845 // CCG024864 // CCG016402 // CCG021399 // CCG002013 // CCG005241 // CCG007989 // CCG006922 // CCG018979 // CCG020…
GO:0010562	P	positive regulation of phosphorus metabolic process	65	4834	219	23397	0.0011	0.19	// CCG021259 // CCG010697 // CCG010162 // CCG001770 // CCG026782 // CCG022572 // CCG006513 // CCG025966 // CCG028304 // CCG022789 // CCG019272 // CCG021404 // CCG020425 // CCG010691 // CCG005973 // CCG015764 // CCG014831 // CCG027849 // CCG027848 // CCG027861 // CCG015955 // CCG027845 // CCG024864 // CCG016402 // CCG021399 // CCG002013 // CCG005241 // CCG007989 // CCG006922 // CCG018979 // CCG020…
GO:0045937	P	positive regulation of phosphate metabolic process	65	4834	219	23397	0.0011	0.19	// CCG021259 // CCG010697 // CCG010162 // CCG001770 // CCG026782 // CCG022572 // CCG006513 // CCG025966 // CCG028304 // CCG022789 // CCG019272 // CCG021404 // CCG020425 // CCG010691 // CCG005973 // CCG015764 // CCG014831 // CCG027849 // CCG027848 // CCG027861 // CCG015955 // CCG027845 // CCG024864 // CCG016402 // CCG021399 // CCG002013 // CCG005241 // CCG007989 // CCG006922 // CCG018979 // CCG020…
GO:0009739	P	response to gibberellin	22	4834	56	23397	0.0011	0.2	// CCG028264 // CCG003114 // CCG007768 // CCG020992 // CCG023855 // CCG016670 // CCG004171 // CCG016441 // CCG016614 // CCG016778 // CCG000551 // CCG006912 // CCG011327 // CCG025015 // CCG027933 // CCG018302 // CCG000153 // CCG001895 // CCG015567 // CCG016669 // CCG026446 // CCG003881
GO:0045860	P	positive regulation of protein kinase activity	64	4834	216	23397	0.0012	0.21	// CCG021259 // CCG010697 // CCG010162 // CCG001770 // CCG026782 // CCG022572 // CCG006513 // CCG025966 // CCG028304 // CCG022789 // CCG019272 // CCG021404 // CCG020425 // CCG010691 // CCG005973 // CCG015764 // CCG014831 // CCG027849 // CCG027848 // CCG027861 // CCG027845 // CCG024864 // CCG016402 // CCG021399 // CCG002013 // CCG005241 // CCG007989 // CCG006922 // CCG018979 // CCG020347 // CCG022…
GO:0023014	P	signal transduction by protein phosphorylation	73	4834	253	23397	0.0013	0.23	// CCG010697 // CCG010162 // CCG001770 // CCG026782 // CCG022572 // CCG006513 // CCG025966 // CCG028304 // CCG022789 // CCG019272 // CCG007782 // CCG021404 // CCG007513 // CCG005973 // CCG015764 // CCG027294 // CCG006455 // CCG021402 // CCG000365 // CCG014831 // CCG027849 // CCG027848 // CCG027861 // CCG027845 // CCG024864 // CCG016402 // CCG017674 // CCG021399 // CCG002013 // CCG005241 // CCG007…
GO:0042221	P	response to chemical	338	4834	1405	23397	0.0015	0.25	// CCG005814 // CCG025729 // CCG020257 // CCG004818 // CCG009262 // CCG005175 // CCG003119 // CCG001638 // CCG025127 // CCG013815 // CCG010914 // CCG000922 // CCG000717 // CCG027642 // CCG020054 // CCG009345 // CCG018266 // CCG006206 // CCG025009 // CCG016441 // CCG011993 // CCG005948 // CCG007402 // CCG009915 // CCG009914 // CCG000125 // CCG008824 // CCG002580 // CCG017655 // CCG005419 // CCG026…
GO:0033674	P	positive regulation of kinase activity	64	4834	218	23397	0.0016	0.26	// CCG021259 // CCG010697 // CCG010162 // CCG001770 // CCG026782 // CCG022572 // CCG006513 // CCG025966 // CCG028304 // CCG022789 // CCG019272 // CCG021404 // CCG020425 // CCG010691 // CCG005973 // CCG015764 // CCG014831 // CCG027849 // CCG027848 // CCG027861 // CCG027845 // CCG024864 // CCG016402 // CCG021399 // CCG002013 // CCG005241 // CCG007989 // CCG006922 // CCG018979 // CCG020347 // CCG022…
GO:0003333	P	amino acid transmembrane transport	38	4834	116	23397	0.0016	0.26	// CCG026815 // CCG019849 // CCG002128 // CCG019046 // CCG009522 // CCG014464 // CCG007651 // CCG016567 // CCG021654 // CCG009234 // CCG003069 // CCG006634 // CCG012792 // CCG009235 // CCG024421 // CCG009070 // CCG001194 // CCG010139 // CCG009593 // CCG026602 // CCG019072 // CCG015017 // CCG020694 // CCG010277 // CCG009519 // CCG008713 // CCG014202 // CCG024170 // CCG027811 // CCG023219 // CCG002…
GO:0010410	P	hemicellulose metabolic process	30	4834	86	23397	0.0016	0.26	// CCG029138 // CCG015021 // CCG008744 // CCG016441 // CCG017963 // CCG018228 // CCG012993 // CCG016792 // CCG027829 // CCG014649 // CCG004058 // CCG021847 // CCG020921 // CCG029580 // CCG026804 // CCG006329 // CCG000351 // CCG028866 // CCG019674 // CCG026490 // CCG006447 // CCG000241 // CCG002707 // CCG020298 // CCG017884 // CCG017554 // CCG017552 // CCG013978 // CCG026727 // CCG011370
GO:0015698	P	inorganic anion transport	42	4834	132	23397	0.0018	0.27	// CCG010029 // CCG004934 // CCG006394 // CCG022740 // CCG005539 // CCG004933 // CCG005128 // CCG023733 // CCG002928 // CCG002925 // CCG006524 // CCG024008 // CCG002665 // CCG004245 // CCG005047 // CCG005046 // CCG012068 // CCG010030 // CCG022816 // CCG003249 // CCG019070 // CCG020044 // CCG013292 // CCG004366 // CCG006513 // CCG006206 // CCG027939 // CCG000507 // CCG029728 // CCG006402 // CCG013…
GO:0050801	P	ion homeostasis	62	4834	211	23397	0.0018	0.27	// CCG012766 // CCG003497 // CCG028283 // CCG029233 // CCG027603 // CCG027602 // CCG025127 // CCG006394 // CCG012768 // CCG025253 // CCG005128 // CCG012830 // CCG009369 // CCG002928 // CCG023474 // CCG013313 // CCG002925 // CCG028870 // CCG028877 // CCG006740 // CCG028406 // CCG028584 // CCG029036 // CCG006271 // CCG029541 // CCG004240 // CCG023831 // CCG022974 // CCG023390 // CCG024098 // CCG005…
GO:0005976	P	polysaccharide metabolic process	102	4834	376	23397	0.0018	0.27	// CCG013954 // CCG029179 // CCG016441 // CCG004057 // CCG012993 // CCG016792 // CCG000550 // CCG027829 // CCG002421 // CCG004058 // CCG000994 // CCG010767 // CCG009115 // CCG029580 // CCG022403 // CCG017912 // CCG019674 // CCG013512 // CCG000241 // CCG020298 // CCG004441 // CCG017554 // CCG020921 // CCG013891 // CCG028760 // CCG024859 // CCG026727 // CCG011370 // CCG026417 // CCG000828 // CCG025…
GO:0009698	P	phenylpropanoid metabolic process	33	4834	98	23397	0.0019	0.27	// CCG010481 // CCG010482 // CCG023635 // CCG026210 // CCG025277 // CCG009757 // CCG009719 // CCG011597 // CCG010478 // CCG012235 // CCG010470 // CCG005419 // CCG020955 // CCG005229 // CCG026285 // CCG020278 // CCG025597 // CCG004841 // CCG004842 // CCG006513 // CCG003823 // CCG003682 // CCG009716 // CCG002555 // CCG017304 // CCG017302 // CCG000886 // CCG002538 // CCG015966 // CCG010471 // CCG004…
GO:0009699	P	phenylpropanoid biosynthetic process	20	4834	51	23397	0.0019	0.27	// CCG012235 // CCG004746 // CCG003823 // CCG020278 // CCG004841 // CCG005419 // CCG017304 // CCG017302 // CCG000886 // CCG023635 // CCG025597 // CCG009716 // CCG004842 // CCG015966 // CCG020955 // CCG005229 // CCG006513 // CCG009757 // CCG009719 // CCG011597
GO:0019932	P	second-messenger-mediated signaling	9	4834	16	23397	0.0019	0.27	// CCG021168 // CCG010502 // CCG015567 // CCG010534 // CCG002431 // CCG010509 // CCG016497 // CCG016495 // CCG026487
GO:0055085	P	transmembrane transport	387	4834	1630	23397	0.0019	0.27	// CCG024993 // CCG000650 // CCG012311 // CCG005413 // CCG028052 // CCG010764 // CCG005228 // CCG005227 // CCG005220 // CCG024421 // CCG009427 // CCG009749 // CCG012823 // CCG013292 // CCG014613 // CCG000404 // CCG022165 // CCG016667 // CCG029479 // CCG026235 // CCG022361 // CCG022009 // CCG001336 // CCG023801 // CCG009108 // CCG003662 // CCG009107 // CCG029253 // CCG029254 // CCG025747 // CCG014…
GO:0045859	P	regulation of protein kinase activity	70	4834	245	23397	0.0021	0.3	// CCG021259 // CCG010697 // CCG002045 // CCG010162 // CCG001770 // CCG026782 // CCG022572 // CCG006513 // CCG025966 // CCG028304 // CCG022789 // CCG019272 // CCG020425 // CCG021404 // CCG009616 // CCG006922 // CCG010691 // CCG005973 // CCG015764 // CCG014831 // CCG027849 // CCG027848 // CCG027861 // CCG027845 // CCG024864 // CCG016402 // CCG021399 // CCG002013 // CCG005241 // CCG007989 // CCG002…
GO:0072348	P	sulfur compound transport	16	4834	38	23397	0.0022	0.3	// CCG027670 // CCG004366 // CCG004934 // CCG024142 // CCG009640 // CCG005539 // CCG004245 // CCG006402 // CCG020044 // CCG019713 // CCG013172 // CCG005047 // CCG005046 // CCG004933 // CCG029206 // CCG012596
GO:0044092	P	negative regulation of molecular function	44	4834	141	23397	0.0022	0.3	// CCG027448 // CCG029179 // CCG029178 // CCG005341 // CCG019828 // CCG019829 // CCG009184 // CCG026807 // CCG015488 // CCG015489 // CCG021682 // CCG021681 // CCG019827 // CCG027450 // CCG027451 // CCG015406 // CCG026203 // CCG012089 // CCG019833 // CCG000006 // CCG021678 // CCG021679 // CCG029469 // CCG024197 // CCG026417 // CCG021378 // CCG022403 // CCG017461 // CCG011322 // CCG012821 // CCG009…
GO:0009664	P	plant-type cell wall organization	29	4834	84	23397	0.0023	0.3	// CCG016624 // CCG009430 // CCG027642 // CCG014370 // CCG018269 // CCG015551 // CCG015552 // CCG017963 // CCG002580 // CCG027840 // CCG005686 // CCG020408 // CCG028385 // CCG011361 // CCG018486 // CCG001855 // CCG003129 // CCG008632 // CCG001580 // CCG000339 // CCG023924 // CCG014103 // CCG014691 // CCG028511 // CCG010085 // CCG028389 // CCG028388 // CCG012119 // CCG023280
GO:0006694	P	steroid biosynthetic process	38	4834	118	23397	0.0023	0.3	// CCG024890 // CCG000928 // CCG005836 // CCG006644 // CCG015473 // CCG016618 // CCG025310 // CCG000671 // CCG006643 // CCG009360 // CCG023208 // CCG015268 // CCG015343 // CCG025129 // CCG013545 // CCG013544 // CCG015448 // CCG008043 // CCG029583 // CCG010959 // CCG000819 // CCG004620 // CCG027283 // CCG010958 // CCG009521 // CCG009448 // CCG025067 // CCG028559 // CCG013239 // CCG006636 // CCG021…
GO:0043549	P	regulation of kinase activity	70	4834	246	23397	0.0024	0.31	// CCG021259 // CCG010697 // CCG002045 // CCG010162 // CCG001770 // CCG026782 // CCG022572 // CCG006513 // CCG025966 // CCG028304 // CCG022789 // CCG019272 // CCG020425 // CCG021404 // CCG009616 // CCG006922 // CCG010691 // CCG005973 // CCG015764 // CCG014831 // CCG027849 // CCG027848 // CCG027861 // CCG027845 // CCG024864 // CCG016402 // CCG021399 // CCG002013 // CCG005241 // CCG007989 // CCG002…
GO:0009395	P	phospholipid catabolic process	7	4834	11	23397	0.0024	0.31	// CCG029470 // CCG029541 // CCG010344 // CCG023474 // CCG023074 // CCG022160 // CCG023073
GO:0007167	P	enzyme linked receptor protein signaling pathway	49	4834	162	23397	0.0026	0.33	// CCG001654 // CCG001655 // CCG010162 // CCG001770 // CCG010249 // CCG008516 // CCG012443 // CCG023750 // CCG007610 // CCG003955 // CCG017663 // CCG019666 // CCG014116 // CCG006214 // CCG024868 // CCG026365 // CCG009055 // CCG010572 // CCG007966 // CCG007989 // CCG016677 // CCG027362 // CCG001157 // CCG007590 // CCG009614 // CCG029372 // CCG009987 // CCG020332 // CCG003121 // CCG018254 // CCG010…
GO:0007178	P	transmembrane receptor protein serine/threonine kinase signaling pathway	49	4834	162	23397	0.0026	0.33	// CCG001654 // CCG001655 // CCG010162 // CCG001770 // CCG010249 // CCG008516 // CCG012443 // CCG023750 // CCG007610 // CCG003955 // CCG017663 // CCG019666 // CCG014116 // CCG006214 // CCG024868 // CCG026365 // CCG009055 // CCG010572 // CCG007966 // CCG007989 // CCG016677 // CCG027362 // CCG001157 // CCG007590 // CCG009614 // CCG029372 // CCG009987 // CCG020332 // CCG003121 // CCG018254 // CCG010…
GO:0046916	P	cellular transition metal ion homeostasis	32	4834	96	23397	0.0026	0.33	// CCG012766 // CCG029233 // CCG027603 // CCG025127 // CCG012768 // CCG012830 // CCG009369 // CCG002992 // CCG013313 // CCG006740 // CCG029036 // CCG006271 // CCG004240 // CCG023831 // CCG022974 // CCG023390 // CCG024098 // CCG020404 // CCG020405 // CCG014321 // CCG019242 // CCG008067 // CCG001971 // CCG023277 // CCG026477 // CCG004214 // CCG012208 // CCG002841 // CCG028283 // CCG008068 // CCG000…
GO:0008645	P	hexose transport	23	4834	63	23397	0.0028	0.33	// CCG011490 // CCG025423 // CCG025421 // CCG001178 // CCG011749 // CCG012415 // CCG028376 // CCG023648 // CCG023647 // CCG011903 // CCG014555 // CCG017035 // CCG017034 // CCG017036 // CCG017031 // CCG009399 // CCG010817 // CCG024623 // CCG000019 // CCG027542 // CCG011750 // CCG025296 // CCG025297
GO:1904659	P	glucose transmembrane transport	23	4834	63	23397	0.0028	0.33	// CCG011490 // CCG025423 // CCG025421 // CCG001178 // CCG011749 // CCG012415 // CCG028376 // CCG023648 // CCG023647 // CCG011903 // CCG014555 // CCG017035 // CCG017034 // CCG017036 // CCG017031 // CCG009399 // CCG010817 // CCG024623 // CCG000019 // CCG027542 // CCG011750 // CCG025296 // CCG025297
GO:0015758	P	glucose transport	23	4834	63	23397	0.0028	0.33	// CCG011490 // CCG025423 // CCG025421 // CCG001178 // CCG011749 // CCG012415 // CCG028376 // CCG023648 // CCG023647 // CCG011903 // CCG014555 // CCG017035 // CCG017034 // CCG017036 // CCG017031 // CCG009399 // CCG010817 // CCG024623 // CCG000019 // CCG027542 // CCG011750 // CCG025296 // CCG025297
GO:0035428	P	hexose transmembrane transport	23	4834	63	23397	0.0028	0.33	// CCG011490 // CCG025423 // CCG025421 // CCG001178 // CCG011749 // CCG012415 // CCG028376 // CCG023648 // CCG023647 // CCG011903 // CCG014555 // CCG017035 // CCG017034 // CCG017036 // CCG017031 // CCG009399 // CCG010817 // CCG024623 // CCG000019 // CCG027542 // CCG011750 // CCG025296 // CCG025297
GO:0006873	P	cellular ion homeostasis	47	4834	155	23397	0.003	0.34	// CCG012766 // CCG028283 // CCG029233 // CCG027603 // CCG027602 // CCG025127 // CCG006394 // CCG012768 // CCG005128 // CCG012830 // CCG009369 // CCG002928 // CCG023474 // CCG013313 // CCG002925 // CCG006740 // CCG022974 // CCG029036 // CCG006271 // CCG029541 // CCG004240 // CCG023831 // CCG028406 // CCG023390 // CCG024098 // CCG026477 // CCG020405 // CCG017743 // CCG008067 // CCG014321 // CCG019…
GO:0010315	P	auxin efflux	8	4834	14	23397	0.003	0.34	// CCG002853 // CCG000903 // CCG000904 // CCG026820 // CCG004546 // CCG002956 // CCG029217 // CCG001269
GO:0044699	P	single-organism process	2089	4834	9479	23397	0.003	0.34	// CCG003942 // CCG010249 // CCG014779 // CCG014771 // CCG014777 // CCG004038 // CCG005411 // CCG000125 // CCG005413 // CCG005419 // CCG010883 // CCG012291 // CCG009427 // CCG009420 // CCG012823 // CCG022168 // CCG012824 // CCG014613 // CCG022160 // CCG022167 // CCG014619 // CCG005733 // CCG022368 // CCG013512 // CCG001239 // CCG013978 // CCG010086 // CCG017983 // CCG025816 // CCG026420 // CCG015…
GO:1905039	P	carboxylic acid transmembrane transport	38	4834	120	23397	0.0032	0.35	// CCG026815 // CCG019849 // CCG002128 // CCG019046 // CCG009522 // CCG014464 // CCG007651 // CCG016567 // CCG021654 // CCG009234 // CCG003069 // CCG006634 // CCG012792 // CCG009235 // CCG024421 // CCG009070 // CCG001194 // CCG010139 // CCG009593 // CCG026602 // CCG019072 // CCG015017 // CCG020694 // CCG010277 // CCG009519 // CCG008713 // CCG014202 // CCG024170 // CCG027811 // CCG023219 // CCG002…
GO:0046323	P	glucose import	22	4834	60	23397	0.0032	0.35	// CCG011490 // CCG025423 // CCG025421 // CCG001178 // CCG011749 // CCG012415 // CCG028376 // CCG023647 // CCG011903 // CCG014555 // CCG017035 // CCG017034 // CCG017036 // CCG017031 // CCG009399 // CCG010817 // CCG024623 // CCG000019 // CCG027542 // CCG011750 // CCG025296 // CCG025297
GO:1903825	P	organic acid transmembrane transport	38	4834	120	23397	0.0032	0.35	// CCG026815 // CCG019849 // CCG002128 // CCG019046 // CCG009522 // CCG014464 // CCG007651 // CCG016567 // CCG021654 // CCG009234 // CCG003069 // CCG006634 // CCG012792 // CCG009235 // CCG024421 // CCG009070 // CCG001194 // CCG010139 // CCG009593 // CCG026602 // CCG019072 // CCG015017 // CCG020694 // CCG010277 // CCG009519 // CCG008713 // CCG014202 // CCG024170 // CCG027811 // CCG023219 // CCG002…
GO:0009733	P	response to auxin	59	4834	204	23397	0.0033	0.36	// CCG010044 // CCG028264 // CCG023998 // CCG001638 // CCG013815 // CCG026072 // CCG026075 // CCG000904 // CCG000508 // CCG016670 // CCG004171 // CCG005948 // CCG001487 // CCG008260 // CCG002853 // CCG026349 // CCG007085 // CCG003148 // CCG010095 // CCG015792 // CCG015692 // CCG001269 // CCG020257 // CCG008812 // CCG009405 // CCG015017 // CCG024445 // CCG026820 // CCG003892 // CCG012823 // CCG027…
GO:0002229	P	defense response to oomycetes	10	4834	20	23397	0.0034	0.36	// CCG014291 // CCG014292 // CCG014293 // CCG014088 // CCG001906 // CCG014087 // CCG026273 // CCG009892 // CCG009889 // CCG014295
GO:0055080	P	cation homeostasis	57	4834	196	23397	0.0034	0.36	// CCG012766 // CCG003497 // CCG029233 // CCG027603 // CCG027602 // CCG025127 // CCG006394 // CCG012768 // CCG025253 // CCG005128 // CCG012830 // CCG009369 // CCG002928 // CCG013313 // CCG002925 // CCG028870 // CCG028877 // CCG006740 // CCG028406 // CCG028584 // CCG029036 // CCG006271 // CCG004240 // CCG023831 // CCG022974 // CCG023390 // CCG024098 // CCG005228 // CCG005227 // CCG026477 // CCG020…
GO:0015749	P	monosaccharide transport	23	4834	64	23397	0.0035	0.36	// CCG011490 // CCG025423 // CCG025421 // CCG001178 // CCG011749 // CCG012415 // CCG028376 // CCG023648 // CCG023647 // CCG011903 // CCG014555 // CCG017035 // CCG017034 // CCG017036 // CCG017031 // CCG009399 // CCG010817 // CCG024623 // CCG000019 // CCG027542 // CCG011750 // CCG025296 // CCG025297
GO:0071705	P	nitrogen compound transport	97	4834	363	23397	0.0036	0.37	// CCG008438 // CCG015164 // CCG008437 // CCG019046 // CCG007651 // CCG016848 // CCG016567 // CCG027981 // CCG006945 // CCG028052 // CCG010764 // CCG012792 // CCG020458 // CCG012068 // CCG009234 // CCG024421 // CCG008713 // CCG013165 // CCG014613 // CCG000404 // CCG008141 // CCG026235 // CCG024620 // CCG020694 // CCG027670 // CCG029253 // CCG029254 // CCG011310 // CCG014259 // CCG009522 // CCG004…
GO:0009967	P	positive regulation of signal transduction	58	4834	201	23397	0.0038	0.38	// CCG010697 // CCG010162 // CCG001770 // CCG026782 // CCG022572 // CCG006513 // CCG025966 // CCG028304 // CCG022789 // CCG019272 // CCG021404 // CCG015468 // CCG010691 // CCG005973 // CCG015764 // CCG014831 // CCG027849 // CCG027848 // CCG027861 // CCG027845 // CCG024864 // CCG016402 // CCG021399 // CCG002013 // CCG005241 // CCG007989 // CCG022568 // CCG018979 // CCG020347 // CCG022797 // CCG003…
GO:0023056	P	positive regulation of signaling	58	4834	201	23397	0.0038	0.38	// CCG010697 // CCG010162 // CCG001770 // CCG026782 // CCG022572 // CCG006513 // CCG025966 // CCG028304 // CCG022789 // CCG019272 // CCG021404 // CCG015468 // CCG010691 // CCG005973 // CCG015764 // CCG014831 // CCG027849 // CCG027848 // CCG027861 // CCG027845 // CCG024864 // CCG016402 // CCG021399 // CCG002013 // CCG005241 // CCG007989 // CCG022568 // CCG018979 // CCG020347 // CCG022797 // CCG003…
GO:0043086	P	negative regulation of catalytic activity	42	4834	137	23397	0.0039	0.39	// CCG027448 // CCG029179 // CCG029178 // CCG019828 // CCG019829 // CCG009184 // CCG026807 // CCG015488 // CCG015489 // CCG021682 // CCG021681 // CCG019827 // CCG027450 // CCG027451 // CCG015406 // CCG026203 // CCG012089 // CCG019833 // CCG000006 // CCG021678 // CCG021679 // CCG029469 // CCG024197 // CCG026417 // CCG021378 // CCG022403 // CCG017461 // CCG011322 // CCG012821 // CCG009378 // CCG019…
GO:0055065	P	metal ion homeostasis	44	4834	145	23397	0.0039	0.39	// CCG012766 // CCG003497 // CCG029233 // CCG027603 // CCG027602 // CCG025127 // CCG012768 // CCG012830 // CCG009369 // CCG002992 // CCG013313 // CCG028870 // CCG028877 // CCG006740 // CCG028406 // CCG028584 // CCG029036 // CCG006271 // CCG004240 // CCG023831 // CCG022974 // CCG023390 // CCG024098 // CCG020404 // CCG020405 // CCG009016 // CCG008067 // CCG014321 // CCG019242 // CCG006348 // CCG022…
GO:0034219	P	carbohydrate transmembrane transport	30	4834	91	23397	0.0042	0.41	// CCG013400 // CCG011490 // CCG002191 // CCG025423 // CCG025421 // CCG001178 // CCG011749 // CCG012415 // CCG028376 // CCG001381 // CCG001382 // CCG001383 // CCG023648 // CCG023647 // CCG011903 // CCG020233 // CCG014555 // CCG017035 // CCG017034 // CCG017036 // CCG017031 // CCG009399 // CCG029479 // CCG010817 // CCG024623 // CCG000019 // CCG027542 // CCG011750 // CCG025296 // CCG025297
GO:0015849	P	organic acid transport	39	4834	126	23397	0.0044	0.42	// CCG026815 // CCG024142 // CCG019849 // CCG002128 // CCG019046 // CCG009522 // CCG014464 // CCG007651 // CCG016567 // CCG021654 // CCG009234 // CCG003069 // CCG006634 // CCG012792 // CCG009235 // CCG024421 // CCG009070 // CCG001194 // CCG010139 // CCG009593 // CCG026602 // CCG019072 // CCG015017 // CCG020694 // CCG010277 // CCG009519 // CCG008713 // CCG014202 // CCG024170 // CCG027811 // CCG023…
GO:0005975	P	carbohydrate metabolic process	287	4834	1201	23397	0.0044	0.42	// CCG013954 // CCG016409 // CCG008530 // CCG001719 // CCG005983 // CCG013481 // CCG003114 // CCG029179 // CCG023731 // CCG010968 // CCG015335 // CCG009854 // CCG016913 // CCG023728 // CCG006660 // CCG004057 // CCG001349 // CCG025716 // CCG012993 // CCG003629 // CCG016792 // CCG000550 // CCG001431 // CCG027986 // CCG002421 // CCG004058 // CCG023133 // CCG017885 // CCG000994 // CCG010767 // CCG009…
GO:0006558	P	L-phenylalanine metabolic process	7	4834	12	23397	0.0047	0.44	// CCG012235 // CCG008154 // CCG009757 // CCG026636 // CCG008622 // CCG025597 // CCG011476
GO:0009808	P	lignin metabolic process	24	4834	69	23397	0.0047	0.44	// CCG010481 // CCG010482 // CCG026210 // CCG025277 // CCG010478 // CCG010470 // CCG005419 // CCG020955 // CCG026285 // CCG020278 // CCG004841 // CCG004842 // CCG006513 // CCG003682 // CCG002555 // CCG017304 // CCG017302 // CCG000886 // CCG002538 // CCG015966 // CCG010471 // CCG004746 // CCG002536 // CCG002537
GO:0010469	P	regulation of receptor activity	7	4834	12	23397	0.0047	0.44	// CCG000507 // CCG008835 // CCG008153 // CCG007265 // CCG000508 // CCG017538 // CCG027371
GO:0010647	P	positive regulation of cell communication	58	4834	203	23397	0.0047	0.44	// CCG010697 // CCG010162 // CCG001770 // CCG026782 // CCG022572 // CCG006513 // CCG025966 // CCG028304 // CCG022789 // CCG019272 // CCG021404 // CCG015468 // CCG010691 // CCG005973 // CCG015764 // CCG014831 // CCG027849 // CCG027848 // CCG027861 // CCG027845 // CCG024864 // CCG016402 // CCG021399 // CCG002013 // CCG005241 // CCG007989 // CCG022568 // CCG018979 // CCG020347 // CCG022797 // CCG003…
GO:0009833	P	plant-type primary cell wall biogenesis	10	4834	21	23397	0.0052	0.48	// CCG013954 // CCG025716 // CCG001917 // CCG001916 // CCG004097 // CCG027589 // CCG013409 // CCG025717 // CCG010767 // CCG023280
GO:0001932	P	regulation of protein phosphorylation	72	4834	262	23397	0.0053	0.48	// CCG021259 // CCG010697 // CCG002045 // CCG010162 // CCG001770 // CCG026782 // CCG022572 // CCG006513 // CCG025966 // CCG028304 // CCG022789 // CCG019272 // CCG020425 // CCG021404 // CCG009616 // CCG006922 // CCG010691 // CCG005973 // CCG015764 // CCG014831 // CCG027849 // CCG027848 // CCG027861 // CCG015955 // CCG027845 // CCG024864 // CCG016402 // CCG021399 // CCG002013 // CCG005241 // CCG007…
GO:0055076	P	transition metal ion homeostasis	35	4834	112	23397	0.0056	0.5	// CCG012766 // CCG029233 // CCG027603 // CCG027602 // CCG025127 // CCG012768 // CCG012830 // CCG009369 // CCG002992 // CCG013313 // CCG006740 // CCG029036 // CCG006271 // CCG004240 // CCG023831 // CCG022974 // CCG023390 // CCG024098 // CCG020404 // CCG020405 // CCG014321 // CCG019242 // CCG008067 // CCG022443 // CCG028307 // CCG001971 // CCG023277 // CCG026477 // CCG004214 // CCG012208 // CCG002…
GO:0090487	P	secondary metabolite catabolic process	15	4834	38	23397	0.0063	0.55	// CCG005641 // CCG012058 // CCG026250 // CCG013822 // CCG013823 // CCG013815 // CCG015480 // CCG013824 // CCG027996 // CCG013817 // CCG015479 // CCG015481 // CCG022752 // CCG022858 // CCG012056
GO:0009407	P	toxin catabolic process	15	4834	38	23397	0.0063	0.55	// CCG005641 // CCG012058 // CCG026250 // CCG013822 // CCG013823 // CCG013815 // CCG015480 // CCG013824 // CCG027996 // CCG013817 // CCG015479 // CCG015481 // CCG022752 // CCG022858 // CCG012056
GO:0042325	P	regulation of phosphorylation	72	4834	264	23397	0.0064	0.55	// CCG021259 // CCG010697 // CCG002045 // CCG010162 // CCG001770 // CCG026782 // CCG022572 // CCG006513 // CCG025966 // CCG028304 // CCG022789 // CCG019272 // CCG020425 // CCG021404 // CCG009616 // CCG006922 // CCG010691 // CCG005973 // CCG015764 // CCG014831 // CCG027849 // CCG027848 // CCG027861 // CCG015955 // CCG027845 // CCG024864 // CCG016402 // CCG021399 // CCG002013 // CCG005241 // CCG007…
GO:0009832	P	plant-type cell wall biogenesis	33	4834	105	23397	0.0064	0.55	// CCG013954 // CCG000903 // CCG016624 // CCG000904 // CCG027589 // CCG013409 // CCG005163 // CCG018269 // CCG015551 // CCG015552 // CCG025716 // CCG004097 // CCG010767 // CCG020893 // CCG029580 // CCG001269 // CCG027612 // CCG020278 // CCG008811 // CCG026603 // CCG001917 // CCG001916 // CCG025717 // CCG006513 // CCG000351 // CCG028866 // CCG024452 // CCG027422 // CCG020921 // CCG003881 // CCG026…
GO:0052547	P	regulation of peptidase activity	12	4834	28	23397	0.0066	0.56	// CCG027450 // CCG027451 // CCG027448 // CCG015406 // CCG019497 // CCG000008 // CCG000009 // CCG012795 // CCG017461 // CCG027447 // CCG018798 // CCG000006
GO:0031401	P	positive regulation of protein modification process	72	4834	265	23397	0.007	0.59	// CCG021259 // CCG010697 // CCG003033 // CCG010162 // CCG001770 // CCG014099 // CCG026782 // CCG022572 // CCG006513 // CCG025966 // CCG028304 // CCG022789 // CCG019272 // CCG021404 // CCG025309 // CCG020425 // CCG010691 // CCG005973 // CCG015764 // CCG010843 // CCG014831 // CCG027849 // CCG027848 // CCG027861 // CCG015955 // CCG027845 // CCG024864 // CCG016402 // CCG021399 // CCG002013 // CCG005…
GO:0010383	P	cell wall polysaccharide metabolic process	30	4834	94	23397	0.0071	0.6	// CCG029138 // CCG015021 // CCG008744 // CCG016441 // CCG017963 // CCG018228 // CCG012993 // CCG016792 // CCG027829 // CCG014649 // CCG004058 // CCG021847 // CCG020921 // CCG029580 // CCG026804 // CCG006329 // CCG000351 // CCG028866 // CCG019674 // CCG026490 // CCG006447 // CCG000241 // CCG002707 // CCG020298 // CCG017884 // CCG017554 // CCG017552 // CCG013978 // CCG026727 // CCG011370
GO:0009809	P	lignin biosynthetic process	11	4834	25	23397	0.0072	0.6	// CCG020278 // CCG005419 // CCG017304 // CCG017302 // CCG000886 // CCG004841 // CCG004842 // CCG015966 // CCG020955 // CCG006513 // CCG004746
GO:0010411	P	xyloglucan metabolic process	19	4834	53	23397	0.0077	0.63	// CCG026804 // CCG029138 // CCG011370 // CCG012993 // CCG016792 // CCG002707 // CCG027829 // CCG006329 // CCG014649 // CCG004058 // CCG017884 // CCG017554 // CCG017552 // CCG021847 // CCG013978 // CCG016441 // CCG017963 // CCG019674 // CCG026490
GO:0030003	P	cellular cation homeostasis	43	4834	146	23397	0.0077	0.63	// CCG012766 // CCG029233 // CCG027603 // CCG027602 // CCG025127 // CCG006394 // CCG012768 // CCG005128 // CCG012830 // CCG009369 // CCG002928 // CCG013313 // CCG002925 // CCG006740 // CCG022974 // CCG029036 // CCG006271 // CCG004240 // CCG023831 // CCG028406 // CCG023390 // CCG024098 // CCG026477 // CCG020405 // CCG008067 // CCG014321 // CCG019242 // CCG006348 // CCG027771 // CCG001971 // CCG023…
GO:0007166	P	cell surface receptor signaling pathway	77	4834	288	23397	0.0083	0.67	// CCG001654 // CCG001655 // CCG010162 // CCG003955 // CCG010249 // CCG001651 // CCG008516 // CCG000594 // CCG012443 // CCG014271 // CCG023750 // CCG007610 // CCG017028 // CCG017663 // CCG017027 // CCG017024 // CCG019666 // CCG014116 // CCG006214 // CCG010801 // CCG016677 // CCG010802 // CCG024945 // CCG024965 // CCG009065 // CCG008245 // CCG009055 // CCG002013 // CCG010572 // CCG001770 // CCG007…
GO:0009695	P	jasmonic acid biosynthetic process	9	4834	19	23397	0.0083	0.67	// CCG026346 // CCG024912 // CCG013215 // CCG016495 // CCG004712 // CCG016497 // CCG001830 // CCG001831 // CCG007605
GO:0043473	P	pigmentation	8	4834	16	23397	0.0086	0.68	// CCG012129 // CCG012124 // CCG012125 // CCG012126 // CCG012137 // CCG012123 // CCG027872 // CCG012134
GO:0002239	P	response to oomycetes	11	4834	26	23397	0.01	0.8	// CCG014291 // CCG014292 // CCG014293 // CCG014088 // CCG001906 // CCG014087 // CCG012343 // CCG026273 // CCG009892 // CCG009889 // CCG014295
GO:0052548	P	regulation of endopeptidase activity	11	4834	26	23397	0.01	0.8	// CCG027450 // CCG027451 // CCG027448 // CCG015406 // CCG000008 // CCG000009 // CCG019497 // CCG017461 // CCG027447 // CCG018798 // CCG000006
GO:0051347	P	positive regulation of transferase activity	69	4834	257	23397	0.011	0.84	// CCG021259 // CCG010697 // CCG003033 // CCG010162 // CCG001770 // CCG014099 // CCG026782 // CCG022572 // CCG006513 // CCG025966 // CCG028304 // CCG022789 // CCG019272 // CCG021404 // CCG020425 // CCG010691 // CCG005973 // CCG015764 // CCG010843 // CCG014831 // CCG027849 // CCG027848 // CCG027861 // CCG027845 // CCG024864 // CCG016402 // CCG021399 // CCG002013 // CCG005241 // CCG007989 // CCG006…
GO:0006875	P	cellular metal ion homeostasis	34	4834	113	23397	0.012	0.9	// CCG012766 // CCG029233 // CCG027603 // CCG027602 // CCG025127 // CCG012768 // CCG012830 // CCG009369 // CCG002992 // CCG013313 // CCG006740 // CCG029036 // CCG006271 // CCG004240 // CCG023831 // CCG022974 // CCG023390 // CCG024098 // CCG020404 // CCG020405 // CCG008067 // CCG014321 // CCG019242 // CCG004214 // CCG001971 // CCG023277 // CCG026477 // CCG006348 // CCG012208 // CCG002841 // CCG028…
GO:0030154	P	cell differentiation	111	4834	439	23397	0.012	0.9	// CCG005939 // CCG025866 // CCG003114 // CCG012589 // CCG014771 // CCG003853 // CCG003916 // CCG024827 // CCG019297 // CCG012793 // CCG004693 // CCG021824 // CCG004694 // CCG004697 // CCG021379 // CCG013751 // CCG027933 // CCG025055 // CCG023728 // CCG016450 // CCG028607 // CCG027831 // CCG014696 // CCG024621 // CCG012661 // CCG026338 // CCG003217 // CCG022748 // CCG000822 // CCG011090 // CCG006…
GO:1902047	P	polyamine transmembrane transport	5	4834	8	23397	0.012	0.91	// CCG009519 // CCG011310 // CCG009522 // CCG022666 // CCG022667
GO:0009404	P	toxin metabolic process	15	4834	41	23397	0.014	1	// CCG005641 // CCG012058 // CCG026250 // CCG013822 // CCG013823 // CCG013815 // CCG015480 // CCG013824 // CCG027996 // CCG013817 // CCG015479 // CCG015481 // CCG022752 // CCG022858 // CCG012056
GO:0051338	P	regulation of transferase activity	76	4834	291	23397	0.015	1	// CCG021259 // CCG010697 // CCG003033 // CCG010162 // CCG001770 // CCG014099 // CCG002045 // CCG026782 // CCG022572 // CCG006513 // CCG025966 // CCG028304 // CCG022789 // CCG019272 // CCG020425 // CCG021404 // CCG009616 // CCG006922 // CCG010691 // CCG005973 // CCG015764 // CCG010843 // CCG014831 // CCG027849 // CCG027848 // CCG027861 // CCG027845 // CCG024864 // CCG016402 // CCG021399 // CCG002…
GO:0006811	P	ion transport	228	4834	965	23397	0.015	1	// CCG025684 // CCG025127 // CCG001883 // CCG015289 // CCG008651 // CCG023733 // CCG024434 // CCG009345 // CCG013313 // CCG007651 // CCG020751 // CCG012311 // CCG029036 // CCG028133 // CCG023832 // CCG007043 // CCG027981 // CCG000005 // CCG027939 // CCG005228 // CCG005227 // CCG012415 // CCG012068 // CCG020443 // CCG027659 // CCG028847 // CCG009234 // CCG027653 // CCG009427 // CCG019070 // CCG027…
GO:0018106	P	peptidyl-histidine phosphorylation	10	4834	24	23397	0.016	1	// CCG006561 // CCG025457 // CCG026433 // CCG007513 // CCG015396 // CCG013499 // CCG006455 // CCG009557 // CCG007204 // CCG000365
GO:0010951	P	negative regulation of endopeptidase activity	10	4834	24	23397	0.016	1	// CCG027450 // CCG027451 // CCG027448 // CCG015406 // CCG000008 // CCG000009 // CCG019497 // CCG017461 // CCG027447 // CCG000006
GO:0030244	P	cellulose biosynthetic process	17	4834	49	23397	0.016	1	// CCG012924 // CCG004057 // CCG013954 // CCG001916 // CCG007526 // CCG001918 // CCG025716 // CCG001917 // CCG029132 // CCG004097 // CCG027589 // CCG013189 // CCG013409 // CCG025717 // CCG010767 // CCG010740 // CCG023280
GO:0010466	P	negative regulation of peptidase activity	10	4834	24	23397	0.016	1	// CCG027450 // CCG027451 // CCG027448 // CCG015406 // CCG000008 // CCG000009 // CCG019497 // CCG017461 // CCG027447 // CCG000006
GO:0015748	P	organophosphate ester transport	24	4834	76	23397	0.017	1	// CCG012968 // CCG008438 // CCG008437 // CCG006762 // CCG022666 // CCG022667 // CCG005121 // CCG005413 // CCG015610 // CCG005362 // CCG013964 // CCG027670 // CCG012969 // CCG012717 // CCG009640 // CCG028237 // CCG012596 // CCG004664 // CCG018292 // CCG025554 // CCG003823 // CCG003662 // CCG011469 // CCG004743
GO:0030001	P	metal ion transport	100	4834	397	23397	0.018	1	// CCG025127 // CCG024434 // CCG009345 // CCG007200 // CCG020751 // CCG012311 // CCG029036 // CCG023832 // CCG007043 // CCG023831 // CCG010078 // CCG008067 // CCG007199 // CCG001971 // CCG020404 // CCG022165 // CCG000035 // CCG001080 // CCG028283 // CCG002992 // CCG003599 // CCG012766 // CCG001842 // CCG013313 // CCG012768 // CCG012830 // CCG008885 // CCG006527 // CCG006526 // CCG000679 // CCG006…
GO:0055082	P	cellular chemical homeostasis	48	4834	174	23397	0.018	1	// CCG012766 // CCG028283 // CCG029233 // CCG027603 // CCG027602 // CCG025127 // CCG006394 // CCG012768 // CCG005128 // CCG012830 // CCG009369 // CCG002928 // CCG023474 // CCG013313 // CCG002925 // CCG006740 // CCG022974 // CCG029036 // CCG006271 // CCG029541 // CCG004240 // CCG023831 // CCG028406 // CCG023390 // CCG024098 // CCG026477 // CCG020405 // CCG017743 // CCG008067 // CCG014321 // CCG019…
GO:0009690	P	cytokinin metabolic process	11	4834	28	23397	0.019	1	// CCG009173 // CCG012682 // CCG007276 // CCG027310 // CCG012683 // CCG004301 // CCG028915 // CCG022169 // CCG022168 // CCG028817 // CCG006732
GO:0015696	P	ammonium transport	8	4834	18	23397	0.02	1	// CCG005517 // CCG009941 // CCG029254 // CCG027981 // CCG008460 // CCG029253 // CCG014860 // CCG008458
GO:0032504	P	multicellular organism reproduction	32	4834	109	23397	0.02	1	// CCG013938 // CCG003114 // CCG008744 // CCG007768 // CCG020992 // CCG023855 // CCG023810 // CCG001349 // CCG017583 // CCG019297 // CCG020890 // CCG020278 // CCG021168 // CCG026603 // CCG020272 // CCG022203 // CCG027933 // CCG028938 // CCG022205 // CCG000351 // CCG024452 // CCG000153 // CCG009448 // CCG007400 // CCG029802 // CCG001895 // CCG010526 // CCG003881 // CCG022206 // CCG003217 // CCG023…
GO:0072488	P	ammonium transmembrane transport	8	4834	18	23397	0.02	1	// CCG005517 // CCG009941 // CCG029254 // CCG027981 // CCG008460 // CCG029253 // CCG014860 // CCG008458
GO:1902531	P	regulation of intracellular signal transduction	58	4834	218	23397	0.021	1	// CCG010697 // CCG010162 // CCG001770 // CCG026782 // CCG022572 // CCG006513 // CCG025966 // CCG028304 // CCG022789 // CCG019272 // CCG021404 // CCG010691 // CCG005973 // CCG015764 // CCG000365 // CCG014831 // CCG027849 // CCG027848 // CCG027861 // CCG027845 // CCG024864 // CCG016402 // CCG021399 // CCG002013 // CCG005241 // CCG007989 // CCG022568 // CCG018979 // CCG020347 // CCG022797 // CCG020…
GO:0015846	P	polyamine transport	5	4834	9	23397	0.022	1	// CCG009519 // CCG011310 // CCG009522 // CCG022666 // CCG022667
GO:0010346	P	shoot axis formation	5	4834	9	23397	0.022	1	// CCG007298 // CCG004333 // CCG026238 // CCG012824 // CCG004704
GO:0010223	P	secondary shoot formation	5	4834	9	23397	0.022	1	// CCG007298 // CCG004333 // CCG026238 // CCG012824 // CCG004704
GO:0001763	P	morphogenesis of a branching structure	5	4834	9	23397	0.022	1	// CCG007298 // CCG004333 // CCG026238 // CCG012824 // CCG004704
GO:0009719	P	response to endogenous stimulus	160	4834	667	23397	0.022	1	// CCG005814 // CCG003119 // CCG001638 // CCG000926 // CCG013815 // CCG024346 // CCG004224 // CCG016441 // CCG005948 // CCG026384 // CCG000551 // CCG010572 // CCG020890 // CCG020893 // CCG012147 // CCG013755 // CCG003114 // CCG028271 // CCG023648 // CCG023647 // CCG016989 // CCG008227 // CCG015503 // CCG012823 // CCG027933 // CCG027930 // CCG010408 // CCG007753 // CCG029470 // CCG024912 // CCG006…
GO:0044703	P	multi-organism reproductive process	63	4834	240	23397	0.023	1	// CCG022535 // CCG011231 // CCG025866 // CCG016093 // CCG019061 // CCG019063 // CCG021404 // CCG013286 // CCG021400 // CCG014639 // CCG021402 // CCG014625 // CCG014626 // CCG009081 // CCG010907 // CCG004152 // CCG016290 // CCG014133 // CCG014640 // CCG001340 // CCG017445 // CCG000816 // CCG014154 // CCG001344 // CCG010450 // CCG004908 // CCG019459 // CCG000082 // CCG000083 // CCG002396 // CCG015…
GO:0043090	P	amino acid import	6	4834	12	23397	0.023	1	// CCG026815 // CCG019046 // CCG014202 // CCG024170 // CCG019849 // CCG007651
GO:0006814	P	sodium ion transport	13	4834	36	23397	0.024	1	// CCG003497 // CCG028584 // CCG028998 // CCG027771 // CCG009018 // CCG028406 // CCG028868 // CCG006526 // CCG006527 // CCG028870 // CCG028877 // CCG000005 // CCG009016
GO:0009694	P	jasmonic acid metabolic process	9	4834	22	23397	0.025	1	// CCG026346 // CCG024912 // CCG013215 // CCG016495 // CCG004712 // CCG016497 // CCG001830 // CCG001831 // CCG007605
GO:0035725	P	sodium ion transmembrane transport	11	4834	29	23397	0.025	1	// CCG003497 // CCG028584 // CCG006526 // CCG027771 // CCG009018 // CCG028406 // CCG028868 // CCG006527 // CCG028870 // CCG028877 // CCG009016
GO:1901565	P	organonitrogen compound catabolic process	47	4834	173	23397	0.025	1	// CCG001296 // CCG027144 // CCG009757 // CCG029053 // CCG005360 // CCG013584 // CCG023220 // CCG001860 // CCG010980 // CCG027394 // CCG025319 // CCG001304 // CCG012235 // CCG025626 // CCG010379 // CCG006455 // CCG001988 // CCG002011 // CCG009216 // CCG002017 // CCG026636 // CCG003893 // CCG023923 // CCG026663 // CCG016815 // CCG008917 // CCG009405 // CCG004295 // CCG021148 // CCG025320 // CCG000…
GO:0010928	P	regulation of auxin mediated signaling pathway	9	4834	22	23397	0.025	1	// CCG001269 // CCG002853 // CCG000903 // CCG000904 // CCG026820 // CCG004546 // CCG025303 // CCG029217 // CCG002956
GO:0016125	P	sterol metabolic process	31	4834	107	23397	0.026	1	// CCG016618 // CCG000928 // CCG005836 // CCG025866 // CCG025722 // CCG025067 // CCG015473 // CCG025310 // CCG000671 // CCG019743 // CCG023208 // CCG015268 // CCG015343 // CCG025129 // CCG015448 // CCG002396 // CCG029583 // CCG000819 // CCG009577 // CCG009360 // CCG007605 // CCG004620 // CCG027283 // CCG008043 // CCG013239 // CCG009521 // CCG021953 // CCG027058 // CCG027059 // CCG002669 // CCG027…
GO:0009966	P	regulation of signal transduction	86	4834	342	23397	0.027	1	// CCG010162 // CCG020347 // CCG003114 // CCG014831 // CCG003911 // CCG029182 // CCG002492 // CCG022797 // CCG005973 // CCG026384 // CCG010498 // CCG008227 // CCG022560 // CCG008719 // CCG022569 // CCG022568 // CCG015270 // CCG003351 // CCG011461 // CCG004723 // CCG007265 // CCG026782 // CCG022572 // CCG025966 // CCG028304 // CCG015383 // CCG019272 // CCG021404 // CCG015468 // CCG021402 // CCG008…
GO:0098661	P	inorganic anion transmembrane transport	22	4834	71	23397	0.027	1	// CCG010029 // CCG004934 // CCG004933 // CCG005539 // CCG006524 // CCG024008 // CCG004366 // CCG004245 // CCG005047 // CCG005046 // CCG029206 // CCG010030 // CCG022816 // CCG003249 // CCG019070 // CCG020044 // CCG013292 // CCG022361 // CCG002431 // CCG002002 // CCG006402 // CCG002665
GO:0044765	P	single-organism transport	265	4834	1149	23397	0.028	1	// CCG008438 // CCG028145 // CCG025684 // CCG025423 // CCG008437 // CCG001883 // CCG008294 // CCG019046 // CCG008651 // CCG007651 // CCG020751 // CCG016848 // CCG009915 // CCG009914 // CCG012311 // CCG005413 // CCG016567 // CCG017655 // CCG014589 // CCG002637 // CCG014882 // CCG010764 // CCG012792 // CCG007084 // CCG005227 // CCG008931 // CCG012416 // CCG023219 // CCG021822 // CCG020443 // CCG023…
GO:0015858	P	nucleoside transport	12	4834	33	23397	0.028	1	// CCG012968 // CCG012969 // CCG008438 // CCG012717 // CCG008437 // CCG009640 // CCG012596 // CCG006762 // CCG014613 // CCG005121 // CCG016848 // CCG029745
GO:1902358	P	sulfate transmembrane transport	10	4834	26	23397	0.029	1	// CCG004366 // CCG004934 // CCG005539 // CCG004245 // CCG006402 // CCG020044 // CCG005047 // CCG005046 // CCG004933 // CCG029206
GO:0006796	P	phosphate-containing compound metabolic process	690	4834	3115	23397	0.029	1	// CCG016409 // CCG010162 // CCG021211 // CCG010249 // CCG020347 // CCG020647 // CCG021443 // CCG023938 // CCG020226 // CCG017622 // CCG007060 // CCG022769 // CCG004055 // CCG028059 // CCG016733 // CCG003320 // CCG028056 // CCG022798 // CCG007492 // CCG007493 // CCG023448 // CCG007496 // CCG007495 // CCG029484 // CCG008811 // CCG014272 // CCG003265 // CCG010914 // CCG014610 // CCG015748 // CCG022…
GO:0008272	P	sulfate transport	10	4834	26	23397	0.029	1	// CCG004366 // CCG004934 // CCG005539 // CCG004245 // CCG006402 // CCG020044 // CCG005047 // CCG005046 // CCG004933 // CCG029206
GO:0023051	P	regulation of signaling	86	4834	343	23397	0.029	1	// CCG010162 // CCG020347 // CCG003114 // CCG014831 // CCG003911 // CCG029182 // CCG002492 // CCG022797 // CCG005973 // CCG026384 // CCG010498 // CCG008227 // CCG022560 // CCG008719 // CCG022569 // CCG022568 // CCG015270 // CCG003351 // CCG011461 // CCG004723 // CCG007265 // CCG026782 // CCG022572 // CCG025966 // CCG028304 // CCG015383 // CCG019272 // CCG021404 // CCG015468 // CCG021402 // CCG008…
GO:0000271	P	polysaccharide biosynthetic process	45	4834	166	23397	0.029	1	// CCG013954 // CCG018228 // CCG029132 // CCG008744 // CCG013409 // CCG000351 // CCG010780 // CCG004057 // CCG016504 // CCG005661 // CCG025896 // CCG000550 // CCG004097 // CCG004886 // CCG000994 // CCG010767 // CCG010740 // CCG029580 // CCG012924 // CCG001918 // CCG019266 // CCG001917 // CCG001916 // CCG006329 // CCG015492 // CCG017912 // CCG025717 // CCG025716 // CCG007526 // CCG028866 // CCG027…
GO:0045861	P	negative regulation of proteolysis	10	4834	26	23397	0.029	1	// CCG027450 // CCG027451 // CCG027448 // CCG015406 // CCG000008 // CCG000009 // CCG019497 // CCG017461 // CCG027447 // CCG000006
GO:0006793	P	phosphorus metabolic process	693	4834	3130	23397	0.03	1	// CCG016409 // CCG010162 // CCG021211 // CCG010249 // CCG020347 // CCG020647 // CCG021443 // CCG023938 // CCG020226 // CCG017622 // CCG007060 // CCG022769 // CCG004055 // CCG028059 // CCG016733 // CCG003320 // CCG028056 // CCG022798 // CCG007492 // CCG007493 // CCG023448 // CCG007496 // CCG007495 // CCG029484 // CCG008811 // CCG014272 // CCG003265 // CCG010914 // CCG014610 // CCG015748 // CCG022…
GO:0010243	P	response to organonitrogen compound	18	4834	56	23397	0.03	1	// CCG008832 // CCG025009 // CCG025505 // CCG007308 // CCG010222 // CCG000383 // CCG024912 // CCG015908 // CCG000384 // CCG029041 // CCG024768 // CCG007795 // CCG020647 // CCG015907 // CCG004171 // CCG010775 // CCG007648 // CCG004828
GO:0010646	P	regulation of cell communication	86	4834	344	23397	0.03	1	// CCG010162 // CCG020347 // CCG003114 // CCG014831 // CCG003911 // CCG029182 // CCG002492 // CCG022797 // CCG005973 // CCG026384 // CCG010498 // CCG008227 // CCG022560 // CCG008719 // CCG022569 // CCG022568 // CCG015270 // CCG003351 // CCG011461 // CCG004723 // CCG007265 // CCG026782 // CCG022572 // CCG025966 // CCG028304 // CCG015383 // CCG019272 // CCG021404 // CCG015468 // CCG021402 // CCG008…
GO:0010252	P	auxin homeostasis	7	4834	16	23397	0.032	1	// CCG002853 // CCG026820 // CCG004841 // CCG004842 // CCG004546 // CCG029217 // CCG002956
GO:0034754	P	cellular hormone metabolic process	11	4834	30	23397	0.032	1	// CCG009173 // CCG012682 // CCG007276 // CCG027310 // CCG012683 // CCG004301 // CCG028915 // CCG022169 // CCG022168 // CCG028817 // CCG006732
GO:0015868	P	purine ribonucleotide transport	9	4834	23	23397	0.033	1	// CCG012968 // CCG012969 // CCG008438 // CCG012717 // CCG008437 // CCG009640 // CCG012596 // CCG006762 // CCG005121
GO:0015865	P	purine nucleotide transport	9	4834	23	23397	0.033	1	// CCG012968 // CCG012969 // CCG008438 // CCG012717 // CCG008437 // CCG009640 // CCG012596 // CCG006762 // CCG005121
GO:0006812	P	cation transport	149	4834	626	23397	0.033	1	// CCG025127 // CCG001883 // CCG024434 // CCG009345 // CCG013313 // CCG020751 // CCG012311 // CCG029036 // CCG028133 // CCG023832 // CCG007043 // CCG027981 // CCG010078 // CCG005228 // CCG005227 // CCG012415 // CCG007190 // CCG028847 // CCG007199 // CCG001971 // CCG020404 // CCG022165 // CCG010817 // CCG022368 // CCG003511 // CCG000035 // CCG006959 // CCG001080 // CCG022009 // CCG028283 // CCG002…
GO:0051503	P	adenine nucleotide transport	9	4834	23	23397	0.033	1	// CCG012968 // CCG012969 // CCG008438 // CCG012717 // CCG008437 // CCG009640 // CCG012596 // CCG006762 // CCG005121
GO:0065009	P	regulation of molecular function	151	4834	635	23397	0.033	1	// CCG010162 // CCG020347 // CCG009466 // CCG029179 // CCG029178 // CCG010690 // CCG009184 // CCG009616 // CCG007501 // CCG014831 // CCG003911 // CCG029182 // CCG026203 // CCG020425 // CCG006862 // CCG015079 // CCG005229 // CCG002492 // CCG021822 // CCG029469 // CCG022797 // CCG021378 // CCG022403 // CCG005973 // CCG020448 // CCG023641 // CCG010498 // CCG012821 // CCG009334 // CCG019773 // CCG022…
GO:0006570	P	tyrosine metabolic process	6	4834	13	23397	0.035	1	// CCG003510 // CCG025626 // CCG026636 // CCG001860 // CCG020935 // CCG026663
GO:0009816	P	defense response to bacterium, incompatible interaction	6	4834	13	23397	0.035	1	// CCG019399 // CCG009405 // CCG010379 // CCG004874 // CCG019400 // CCG019401
GO:0009074	P	aromatic amino acid family catabolic process	6	4834	13	23397	0.035	1	// CCG025626 // CCG013584 // CCG001860 // CCG001988 // CCG014491 // CCG026663
GO:0008643	P	carbohydrate transport	40	4834	147	23397	0.035	1	// CCG000019 // CCG023856 // CCG006882 // CCG011490 // CCG008312 // CCG002191 // CCG013400 // CCG025423 // CCG025421 // CCG001178 // CCG011749 // CCG008694 // CCG009399 // CCG001381 // CCG001382 // CCG001383 // CCG023648 // CCG023647 // CCG009640 // CCG012596 // CCG011903 // CCG020233 // CCG014555 // CCG012415 // CCG017035 // CCG017034 // CCG017036 // CCG017031 // CCG028376 // CCG029479 // CCG010…
GO:0019722	P	calcium-mediated signaling	6	4834	13	23397	0.035	1	// CCG010502 // CCG021168 // CCG010509 // CCG016497 // CCG016495 // CCG026487
GO:0000160	P	phosphorelay signal transduction system	24	4834	81	23397	0.036	1	// CCG003119 // CCG014313 // CCG006455 // CCG000365 // CCG015429 // CCG007946 // CCG008878 // CCG015396 // CCG022223 // CCG021149 // CCG018323 // CCG025593 // CCG007513 // CCG022990 // CCG027034 // CCG025457 // CCG028825 // CCG013189 // CCG004892 // CCG016027 // CCG015908 // CCG007991 // CCG012171 // CCG019939
GO:0009856	P	pollination	56	4834	216	23397	0.037	1	// CCG022535 // CCG025866 // CCG016093 // CCG019061 // CCG019063 // CCG021404 // CCG021400 // CCG014639 // CCG021402 // CCG014625 // CCG014626 // CCG009081 // CCG010907 // CCG004152 // CCG016290 // CCG014133 // CCG014640 // CCG001340 // CCG000816 // CCG014154 // CCG001344 // CCG010450 // CCG019459 // CCG000082 // CCG000083 // CCG002396 // CCG026245 // CCG001689 // CCG018979 // CCG021493 // CCG013…
GO:0044706	P	multi-multicellular organism process	56	4834	216	23397	0.037	1	// CCG022535 // CCG025866 // CCG016093 // CCG019061 // CCG019063 // CCG021404 // CCG021400 // CCG014639 // CCG021402 // CCG014625 // CCG014626 // CCG009081 // CCG010907 // CCG004152 // CCG016290 // CCG014133 // CCG014640 // CCG001340 // CCG000816 // CCG014154 // CCG001344 // CCG010450 // CCG019459 // CCG000082 // CCG000083 // CCG002396 // CCG026245 // CCG001689 // CCG018979 // CCG021493 // CCG013…
GO:0009308	P	amine metabolic process	27	4834	94	23397	0.04	1	// CCG005812 // CCG027310 // CCG013584 // CCG000903 // CCG000904 // CCG028903 // CCG028817 // CCG025319 // CCG004301 // CCG006683 // CCG001269 // CCG023661 // CCG009173 // CCG007276 // CCG025320 // CCG000837 // CCG028915 // CCG022169 // CCG022168 // CCG001988 // CCG027814 // CCG006732 // CCG002492 // CCG012683 // CCG012682 // CCG020512 // CCG014491
GO:0000910	P	cytokinesis	17	4834	54	23397	0.041	1	// CCG015025 // CCG013954 // CCG007526 // CCG025716 // CCG022434 // CCG001917 // CCG001916 // CCG004097 // CCG006431 // CCG027589 // CCG026408 // CCG015041 // CCG013409 // CCG025717 // CCG010767 // CCG011729 // CCG023280
GO:0042445	P	hormone metabolic process	31	4834	111	23397	0.042	1	// CCG016618 // CCG025129 // CCG000903 // CCG000904 // CCG015473 // CCG025310 // CCG000671 // CCG019743 // CCG023208 // CCG015268 // CCG015343 // CCG000928 // CCG004301 // CCG006732 // CCG001269 // CCG009173 // CCG007276 // CCG028817 // CCG027310 // CCG028915 // CCG022169 // CCG022168 // CCG020647 // CCG004620 // CCG027283 // CCG008043 // CCG013239 // CCG021953 // CCG004704 // CCG012683 // CCG012…
GO:0042592	P	homeostatic process	118	4834	492	23397	0.042	1	// CCG008824 // CCG000928 // CCG025127 // CCG019046 // CCG023733 // CCG013313 // CCG007651 // CCG018575 // CCG026815 // CCG023831 // CCG005228 // CCG005227 // CCG029469 // CCG013755 // CCG008067 // CCG006107 // CCG001971 // CCG015473 // CCG026477 // CCG014000 // CCG006348 // CCG000243 // CCG008022 // CCG022009 // CCG001336 // CCG002992 // CCG003599 // CCG017983 // CCG012766 // CCG028283 // CCG016…
GO:0090376	P	seed trichome differentiation	21	4834	70	23397	0.042	1	// CCG007400 // CCG017583 // CCG001895 // CCG021168 // CCG019297 // CCG010526 // CCG026603 // CCG007768 // CCG003114 // CCG020278 // CCG024452 // CCG022203 // CCG000351 // CCG022206 // CCG028938 // CCG022205 // CCG003881 // CCG027933 // CCG003217 // CCG000153 // CCG009448
GO:0045492	P	xylan biosynthetic process	9	4834	24	23397	0.044	1	// CCG006447 // CCG018228 // CCG000241 // CCG020298 // CCG008744 // CCG000351 // CCG028866 // CCG029580 // CCG026727
GO:0072530	P	purine-containing compound transmembrane transport	7	4834	17	23397	0.044	1	// CCG012717 // CCG009640 // CCG012596 // CCG010764 // CCG013165 // CCG006882 // CCG024766
GO:0009867	P	jasmonic acid mediated signaling pathway	13	4834	39	23397	0.045	1	// CCG013755 // CCG023661 // CCG026384 // CCG002329 // CCG029549 // CCG024912 // CCG016989 // CCG008227 // CCG001830 // CCG001831 // CCG004723 // CCG023855 // CCG000594
GO:0006334	P	nucleosome assembly	13	4834	39	23397	0.045	1	// CCG025574 // CCG021380 // CCG007665 // CCG007669 // CCG021379 // CCG010059 // CCG005172 // CCG000983 // CCG005304 // CCG003192 // CCG017675 // CCG015676 // CCG012103
GO:0051174	P	regulation of phosphorus metabolic process	76	4834	306	23397	0.045	1	// CCG021259 // CCG010697 // CCG002045 // CCG010162 // CCG001770 // CCG026782 // CCG022572 // CCG006513 // CCG025966 // CCG028304 // CCG022789 // CCG019272 // CCG020425 // CCG021404 // CCG009616 // CCG006922 // CCG010691 // CCG005973 // CCG015488 // CCG015489 // CCG015764 // CCG014831 // CCG027849 // CCG027848 // CCG027861 // CCG015955 // CCG027845 // CCG024864 // CCG016402 // CCG012089 // CCG021…
GO:0019220	P	regulation of phosphate metabolic process	76	4834	306	23397	0.045	1	// CCG021259 // CCG010697 // CCG002045 // CCG010162 // CCG001770 // CCG026782 // CCG022572 // CCG006513 // CCG025966 // CCG028304 // CCG022789 // CCG019272 // CCG020425 // CCG021404 // CCG009616 // CCG006922 // CCG010691 // CCG005973 // CCG015488 // CCG015489 // CCG015764 // CCG014831 // CCG027849 // CCG027848 // CCG027861 // CCG015955 // CCG027845 // CCG024864 // CCG016402 // CCG012089 // CCG021…
GO:0051346	P	negative regulation of hydrolase activity	13	4834	39	23397	0.045	1	// CCG027450 // CCG027451 // CCG027448 // CCG015406 // CCG012089 // CCG000008 // CCG000009 // CCG019497 // CCG017461 // CCG027447 // CCG015488 // CCG015489 // CCG000006
GO:0009734	P	auxin-activated signaling pathway	26	4834	91	23397	0.046	1	// CCG023998 // CCG007085 // CCG013815 // CCG000904 // CCG001487 // CCG002853 // CCG026349 // CCG003148 // CCG003892 // CCG000903 // CCG001269 // CCG008260 // CCG015017 // CCG026820 // CCG025303 // CCG005937 // CCG002956 // CCG009964 // CCG023788 // CCG024912 // CCG004546 // CCG026440 // CCG004407 // CCG000961 // CCG029217 // CCG027252
GO:0009725	P	response to hormone	149	4834	634	23397	0.047	1	// CCG005814 // CCG003119 // CCG001638 // CCG000926 // CCG013815 // CCG027930 // CCG004224 // CCG016441 // CCG005948 // CCG000551 // CCG010572 // CCG020890 // CCG020893 // CCG012147 // CCG013755 // CCG003114 // CCG028271 // CCG023648 // CCG023647 // CCG016989 // CCG008227 // CCG015503 // CCG012823 // CCG027933 // CCG024346 // CCG010408 // CCG007753 // CCG029470 // CCG024912 // CCG006950 // CCG013…
GO:0006004	P	fucose metabolic process	14	4834	43	23397	0.047	1	// CCG006336 // CCG025875 // CCG026198 // CCG016590 // CCG019075 // CCG008647 // CCG027915 // CCG027914 // CCG022451 // CCG006550 // CCG009931 // CCG004549 // CCG019674 // CCG026351
GO:0009834	P	plant-type secondary cell wall biogenesis	15	4834	47	23397	0.048	1	// CCG020278 // CCG008811 // CCG026603 // CCG000903 // CCG005163 // CCG000904 // CCG024452 // CCG020921 // CCG006513 // CCG003881 // CCG000351 // CCG028866 // CCG029580 // CCG026727 // CCG001269
GO:0016491	F	oxidoreductase activity	711	4834	2698	23397	1.3e-11	1.7e-08	// CCG010161 // CCG020647 // CCG023248 // CCG022649 // CCG023240 // CCG023243 // CCG023245 // CCG023247 // CCG015531 // CCG000125 // CCG005419 // CCG013320 // CCG002509 // CCG013096 // CCG013095 // CCG013094 // CCG024429 // CCG027642 // CCG021260 // CCG022169 // CCG022168 // CCG010959 // CCG022167 // CCG027837 // CCG017883 // CCG016788 // CCG026236 // CCG000650 // CCG029470 // CCG016787 // CCG001…
GO:0003700	F	transcription factor activity, sequence-specific DNA binding	254	4834	825	23397	1.3e-11	1.7e-08	// CCG009755 // CCG026635 // CCG013666 // CCG000222 // CCG025043 // CCG012589 // CCG018266 // CCG016443 // CCG014771 // CCG004227 // CCG003853 // CCG026711 // CCG002874 // CCG016560 // CCG007048 // CCG029506 // CCG012310 // CCG002733 // CCG016014 // CCG016658 // CCG000258 // CCG016012 // CCG004698 // CCG007961 // CCG027638 // CCG012793 // CCG004693 // CCG027637 // CCG004694 // CCG004697 // CCG024…
GO:0001071	F	nucleic acid binding transcription factor activity	254	4834	825	23397	1.3e-11	1.7e-08	// CCG009755 // CCG026635 // CCG013666 // CCG000222 // CCG025043 // CCG012589 // CCG018266 // CCG016443 // CCG014771 // CCG004227 // CCG003853 // CCG026711 // CCG002874 // CCG016560 // CCG007048 // CCG029506 // CCG012310 // CCG002733 // CCG016014 // CCG016658 // CCG000258 // CCG016012 // CCG004698 // CCG007961 // CCG027638 // CCG012793 // CCG004693 // CCG027637 // CCG004694 // CCG004697 // CCG024…
GO:0020037	F	heme binding	179	4834	560	23397	4.3e-10	4.2e-07	// CCG014539 // CCG000928 // CCG025722 // CCG020647 // CCG028164 // CCG025012 // CCG015473 // CCG014370 // CCG014777 // CCG018160 // CCG013505 // CCG000125 // CCG013506 // CCG002580 // CCG005419 // CCG025129 // CCG028448 // CCG012061 // CCG012060 // CCG012062 // CCG029776 // CCG013095 // CCG013094 // CCG028446 // CCG028447 // CCG028444 // CCG029583 // CCG015547 // CCG027642 // CCG020408 // CCG021…
GO:0008194	F	UDP-glycosyltransferase activity	135	4834	398	23397	8e-10	4.9e-07	// CCG013954 // CCG015169 // CCG027513 // CCG019769 // CCG002711 // CCG008700 // CCG004057 // CCG017374 // CCG011971 // CCG003523 // CCG007046 // CCG023133 // CCG000994 // CCG010767 // CCG029580 // CCG021252 // CCG005406 // CCG015178 // CCG022246 // CCG022245 // CCG023722 // CCG017912 // CCG025268 // CCG008145 // CCG013512 // CCG028975 // CCG016784 // CCG017418 // CCG026727 // CCG028309 // CCG012…
GO:0035251	F	UDP-glucosyltransferase activity	105	4834	289	23397	8.1e-10	4.9e-07	// CCG013954 // CCG015169 // CCG019769 // CCG002711 // CCG008700 // CCG004057 // CCG017374 // CCG011971 // CCG003523 // CCG007046 // CCG010767 // CCG005406 // CCG015178 // CCG022246 // CCG022245 // CCG008145 // CCG013512 // CCG016784 // CCG017418 // CCG025588 // CCG025277 // CCG008761 // CCG007107 // CCG008768 // CCG001918 // CCG014719 // CCG006358 // CCG028543 // CCG006356 // CCG006357 // CCG018…
GO:0001135	F	transcription factor activity, RNA polymerase II transcription factor recruiting	59	4834	134	23397	1.1e-09	4.9e-07	// CCG019253 // CCG014609 // CCG022748 // CCG028301 // CCG011090 // CCG001779 // CCG024452 // CCG003975 // CCG012589 // CCG011910 // CCG005163 // CCG013728 // CCG025233 // CCG014771 // CCG021684 // CCG014621 // CCG003853 // CCG016610 // CCG023718 // CCG020280 // CCG004093 // CCG004092 // CCG004090 // CCG009794 // CCG007389 // CCG010704 // CCG012793 // CCG026711 // CCG029145 // CCG004693 // CCG021…
GO:0080043	F	quercetin 3-O-glucosyltransferase activity	73	4834	180	23397	1.2e-09	4.9e-07	// CCG005794 // CCG025588 // CCG018862 // CCG014732 // CCG014733 // CCG028543 // CCG006357 // CCG025277 // CCG008761 // CCG005795 // CCG019769 // CCG018863 // CCG024399 // CCG008768 // CCG008700 // CCG014719 // CCG024397 // CCG017374 // CCG011971 // CCG004265 // CCG027515 // CCG027514 // CCG014735 // CCG014734 // CCG006356 // CCG003523 // CCG027513 // CCG002711 // CCG018643 // CCG018642 // CCG008…
GO:0080044	F	quercetin 7-O-glucosyltransferase activity	73	4834	180	23397	1.2e-09	4.9e-07	// CCG005794 // CCG025588 // CCG018862 // CCG014732 // CCG014733 // CCG028543 // CCG006357 // CCG025277 // CCG008761 // CCG005795 // CCG019769 // CCG018863 // CCG024399 // CCG008768 // CCG008700 // CCG014719 // CCG024397 // CCG017374 // CCG011971 // CCG004265 // CCG027515 // CCG027514 // CCG014735 // CCG014734 // CCG006356 // CCG003523 // CCG027513 // CCG002711 // CCG018643 // CCG018642 // CCG008…
GO:0016705	F	oxidoreductase activity, acting on paired donors, with incorporation or reduction of molecular oxygen	180	4834	571	23397	1.3e-09	4.9e-07	// CCG014539 // CCG000928 // CCG001423 // CCG006039 // CCG028164 // CCG016902 // CCG009345 // CCG014777 // CCG013505 // CCG013506 // CCG008043 // CCG011603 // CCG000551 // CCG008997 // CCG028448 // CCG012061 // CCG012060 // CCG012062 // CCG029776 // CCG013095 // CCG013094 // CCG028446 // CCG028447 // CCG028444 // CCG029583 // CCG024429 // CCG008814 // CCG023092 // CCG023093 // CCG015473 // CCG016…
GO:0001134	F	transcription factor activity, transcription factor recruiting	60	4834	138	23397	1.5e-09	5.1e-07	// CCG019253 // CCG014609 // CCG022748 // CCG028301 // CCG011090 // CCG001779 // CCG024452 // CCG003975 // CCG012589 // CCG011910 // CCG005163 // CCG013728 // CCG025233 // CCG014771 // CCG021684 // CCG014621 // CCG003853 // CCG016610 // CCG023718 // CCG020280 // CCG005647 // CCG004093 // CCG004092 // CCG004090 // CCG009794 // CCG007389 // CCG010704 // CCG012793 // CCG026711 // CCG029145 // CCG004…
GO:0046906	F	tetrapyrrole binding	183	4834	589	23397	3.2e-09	1e-06	// CCG014539 // CCG000928 // CCG025722 // CCG020647 // CCG028164 // CCG025012 // CCG015473 // CCG014370 // CCG014777 // CCG018160 // CCG013505 // CCG000125 // CCG013506 // CCG002580 // CCG005419 // CCG025129 // CCG028448 // CCG012061 // CCG012060 // CCG012062 // CCG029776 // CCG013095 // CCG013094 // CCG028446 // CCG028447 // CCG028444 // CCG029583 // CCG015547 // CCG027642 // CCG020408 // CCG021…
GO:0046527	F	glucosyltransferase activity	107	4834	305	23397	5.2e-09	1.5e-06	// CCG013954 // CCG015169 // CCG019769 // CCG002711 // CCG008700 // CCG004057 // CCG017374 // CCG011971 // CCG003523 // CCG007046 // CCG010767 // CCG005406 // CCG015178 // CCG022246 // CCG022245 // CCG008145 // CCG013512 // CCG016784 // CCG017418 // CCG025588 // CCG025277 // CCG008761 // CCG007107 // CCG008768 // CCG001918 // CCG014719 // CCG006358 // CCG028543 // CCG006356 // CCG006357 // CCG018…
GO:0004713	F	protein tyrosine kinase activity	108	4834	309	23397	5.6e-09	1.5e-06	// CCG010249 // CCG014831 // CCG007966 // CCG007492 // CCG007493 // CCG022793 // CCG007496 // CCG007495 // CCG023400 // CCG005865 // CCG023880 // CCG008719 // CCG022569 // CCG022568 // CCG012982 // CCG012983 // CCG025450 // CCG022801 // CCG001654 // CCG001655 // CCG022572 // CCG012443 // CCG008250 // CCG006059 // CCG023266 // CCG023264 // CCG016677 // CCG014154 // CCG000476 // CCG005241 // CCG017…
GO:0000981	F	RNA polymerase II transcription factor activity, sequence-specific DNA binding	82	4834	220	23397	1.4e-08	3.5e-06	// CCG019253 // CCG005684 // CCG014609 // CCG022748 // CCG005939 // CCG026110 // CCG008414 // CCG000822 // CCG011090 // CCG005163 // CCG001779 // CCG024452 // CCG016634 // CCG003975 // CCG012589 // CCG011910 // CCG001488 // CCG018266 // CCG013728 // CCG025233 // CCG014771 // CCG021684 // CCG014621 // CCG027290 // CCG016610 // CCG002874 // CCG020280 // CCG011606 // CCG005287 // CCG025561 // CCG016…
GO:0043565	F	sequence-specific DNA binding	221	4834	752	23397	1.7e-08	4e-06	// CCG029278 // CCG025717 // CCG005635 // CCG026635 // CCG025716 // CCG013954 // CCG013666 // CCG025043 // CCG012589 // CCG016443 // CCG014771 // CCG004227 // CCG003853 // CCG002874 // CCG004057 // CCG007048 // CCG029506 // CCG012310 // CCG005684 // CCG016014 // CCG016658 // CCG007047 // CCG007961 // CCG012793 // CCG016389 // CCG010767 // CCG004693 // CCG021824 // CCG004694 // CCG004697 // CCG000…
GO:0004497	F	monooxygenase activity	148	4834	466	23397	1.9e-08	4.3e-06	// CCG014539 // CCG000928 // CCG001423 // CCG006039 // CCG028164 // CCG020054 // CCG014777 // CCG013505 // CCG013506 // CCG011603 // CCG010379 // CCG025129 // CCG028448 // CCG012061 // CCG012060 // CCG012062 // CCG029776 // CCG013095 // CCG013094 // CCG028446 // CCG028447 // CCG028444 // CCG029583 // CCG015547 // CCG008814 // CCG009626 // CCG023092 // CCG023093 // CCG015473 // CCG008893 // CCG017…
GO:0004871	F	signal transducer activity	176	4834	577	23397	2.6e-08	5.5e-06	// CCG010162 // CCG010249 // CCG020347 // CCG015392 // CCG009614 // CCG024788 // CCG027654 // CCG003119 // CCG003911 // CCG001340 // CCG029182 // CCG009055 // CCG010572 // CCG007966 // CCG006869 // CCG002492 // CCG000594 // CCG022797 // CCG027659 // CCG025457 // CCG005973 // CCG009987 // CCG027656 // CCG027657 // CCG010498 // CCG027655 // CCG005865 // CCG015748 // CCG022560 // CCG008719 // CCG022…
GO:0016628	F	oxidoreductase activity, acting on the CH-CH group of donors, NAD or NADP as acceptor	129	4834	397	23397	3.3e-08	6.6e-06	// CCG003119 // CCG003118 // CCG006513 // CCG021443 // CCG028166 // CCG000650 // CCG007200 // CCG017622 // CCG002877 // CCG009916 // CCG027872 // CCG007043 // CCG010161 // CCG013393 // CCG004698 // CCG010579 // CCG012416 // CCG023400 // CCG026925 // CCG005973 // CCG001723 // CCG007199 // CCG017407 // CCG008541 // CCG003511 // CCG003510 // CCG010817 // CCG024623 // CCG003351 // CCG004892 // CCG025…
GO:0016758	F	transferase activity, transferring hexosyl groups	174	4834	573	23397	4.3e-08	8.2e-06	// CCG013954 // CCG015169 // CCG015180 // CCG005983 // CCG014448 // CCG019769 // CCG016441 // CCG002711 // CCG008700 // CCG004057 // CCG017374 // CCG011971 // CCG012993 // CCG027513 // CCG016792 // CCG027829 // CCG003523 // CCG004058 // CCG023133 // CCG000994 // CCG010767 // CCG008699 // CCG020893 // CCG029580 // CCG021252 // CCG005406 // CCG015178 // CCG022246 // CCG022245 // CCG023722 // CCG017…
GO:0032440	F	2-alkenal reductase [NAD(P)] activity	112	4834	340	23397	1.1e-07	1.9e-05	// CCG003119 // CCG003118 // CCG006513 // CCG028166 // CCG000650 // CCG007200 // CCG017622 // CCG002877 // CCG009916 // CCG007043 // CCG010161 // CCG013393 // CCG004698 // CCG010579 // CCG012416 // CCG023400 // CCG026925 // CCG005973 // CCG001723 // CCG023647 // CCG017999 // CCG008541 // CCG004844 // CCG003511 // CCG010817 // CCG024623 // CCG003351 // CCG004892 // CCG025296 // CCG025297 // CCG012…
GO:0016627	F	oxidoreductase activity, acting on the CH-CH group of donors	158	4834	517	23397	1.1e-07	1.9e-05	// CCG003119 // CCG010161 // CCG006509 // CCG025150 // CCG021443 // CCG028166 // CCG000650 // CCG007200 // CCG017622 // CCG013267 // CCG002877 // CCG013505 // CCG009916 // CCG007691 // CCG007043 // CCG003118 // CCG013393 // CCG004698 // CCG028448 // CCG010579 // CCG012416 // CCG028446 // CCG023400 // CCG026925 // CCG005973 // CCG001723 // CCG007199 // CCG017407 // CCG008541 // CCG003511 // CCG003…
GO:0004715	F	non-membrane spanning protein tyrosine kinase activity	63	4834	170	23397	7.3e-07	0.00012	// CCG005241 // CCG010249 // CCG020266 // CCG023880 // CCG020265 // CCG012443 // CCG006173 // CCG000919 // CCG007610 // CCG024779 // CCG017968 // CCG023266 // CCG023264 // CCG009262 // CCG016488 // CCG004942 // CCG024947 // CCG024946 // CCG014133 // CCG026365 // CCG027846 // CCG000476 // CCG007966 // CCG007493 // CCG007492 // CCG006869 // CCG008792 // CCG022793 // CCG007496 // CCG001157 // CCG007…
GO:0004553	F	hydrolase activity, hydrolyzing O-glycosyl compounds	145	4834	481	23397	7.8e-07	0.00013	// CCG008530 // CCG001719 // CCG001431 // CCG023731 // CCG007204 // CCG010968 // CCG009854 // CCG016913 // CCG006660 // CCG003629 // CCG000289 // CCG012317 // CCG012993 // CCG016792 // CCG028619 // CCG027829 // CCG004058 // CCG009115 // CCG012391 // CCG012390 // CCG008381 // CCG009742 // CCG025755 // CCG008389 // CCG020047 // CCG017349 // CCG006659 // CCG025617 // CCG017554 // CCG017552 // CCG023…
GO:0016706	F	oxidoreductase activity, acting on paired donors, with incorporation or reduction of molecular oxygen, 2-oxoglutarate as one donor, and incorporation of one atom each of oxygen into both donors	40	4834	93	23397	1e-06	0.00015	// CCG012127 // CCG007247 // CCG024429 // CCG018552 // CCG016902 // CCG026875 // CCG026874 // CCG006769 // CCG008984 // CCG018551 // CCG026084 // CCG012129 // CCG012124 // CCG012125 // CCG012126 // CCG000551 // CCG012123 // CCG014856 // CCG024643 // CCG018293 // CCG003044 // CCG022911 // CCG002155 // CCG011329 // CCG024981 // CCG018294 // CCG008997 // CCG018302 // CCG016901 // CCG013321 // CCG013…
GO:0019199	F	transmembrane receptor protein kinase activity	80	4834	234	23397	1.2e-06	0.00018	// CCG001654 // CCG001655 // CCG010162 // CCG001770 // CCG010249 // CCG002122 // CCG008516 // CCG012443 // CCG017999 // CCG024793 // CCG023750 // CCG007610 // CCG009614 // CCG003955 // CCG017663 // CCG006059 // CCG006509 // CCG014626 // CCG019666 // CCG014116 // CCG006214 // CCG004152 // CCG004150 // CCG014133 // CCG026365 // CCG012094 // CCG014154 // CCG011027 // CCG009055 // CCG010572 // CCG007…
GO:0016757	F	transferase activity, transferring glycosyl groups	220	4834	792	23397	1.7e-06	0.00023	// CCG013954 // CCG015169 // CCG015180 // CCG005983 // CCG017906 // CCG014448 // CCG019769 // CCG006336 // CCG002711 // CCG008700 // CCG004057 // CCG017374 // CCG011971 // CCG007726 // CCG027513 // CCG016792 // CCG027829 // CCG003523 // CCG004058 // CCG023133 // CCG027111 // CCG000994 // CCG010767 // CCG008699 // CCG020893 // CCG006997 // CCG029580 // CCG021252 // CCG005406 // CCG025875 // CCG015…
GO:0099600	F	transmembrane receptor activity	95	4834	292	23397	1.7e-06	0.00023	// CCG010162 // CCG010249 // CCG015392 // CCG009614 // CCG009055 // CCG010572 // CCG007966 // CCG027659 // CCG009987 // CCG027656 // CCG027657 // CCG027654 // CCG027655 // CCG005865 // CCG015748 // CCG008719 // CCG029372 // CCG025450 // CCG012171 // CCG001654 // CCG001655 // CCG001651 // CCG012443 // CCG006059 // CCG019666 // CCG006214 // CCG014154 // CCG017999 // CCG001157 // CCG024868 // CCG012…
GO:0004888	F	transmembrane signaling receptor activity	94	4834	289	23397	1.9e-06	0.00026	// CCG010162 // CCG010249 // CCG015392 // CCG009614 // CCG009055 // CCG010572 // CCG007966 // CCG027659 // CCG009987 // CCG027656 // CCG027657 // CCG027654 // CCG027655 // CCG005865 // CCG015748 // CCG008719 // CCG029372 // CCG025450 // CCG012171 // CCG001654 // CCG001655 // CCG001651 // CCG012443 // CCG006059 // CCG019666 // CCG006214 // CCG014154 // CCG017999 // CCG001157 // CCG024868 // CCG012…
GO:0001076	F	transcription factor activity, RNA polymerase II transcription factor binding	62	4834	171	23397	2.1e-06	0.00026	// CCG019253 // CCG014609 // CCG022748 // CCG028301 // CCG011090 // CCG001779 // CCG024452 // CCG003975 // CCG012589 // CCG011910 // CCG005163 // CCG013728 // CCG025233 // CCG014771 // CCG005004 // CCG014621 // CCG003853 // CCG016610 // CCG023718 // CCG020280 // CCG021684 // CCG004093 // CCG004092 // CCG004090 // CCG009794 // CCG007389 // CCG010704 // CCG003217 // CCG012793 // CCG026711 // CCG029…
GO:0004872	F	receptor activity	106	4834	336	23397	2.3e-06	0.00027	// CCG010162 // CCG010249 // CCG003114 // CCG009614 // CCG009055 // CCG010572 // CCG007966 // CCG027659 // CCG025457 // CCG009987 // CCG027656 // CCG027657 // CCG010498 // CCG027655 // CCG005865 // CCG015748 // CCG008719 // CCG029372 // CCG025450 // CCG015392 // CCG027034 // CCG012171 // CCG001654 // CCG001655 // CCG001651 // CCG012443 // CCG006059 // CCG019666 // CCG006214 // CCG006455 // CCG014…
GO:0060089	F	molecular transducer activity	106	4834	336	23397	2.3e-06	0.00027	// CCG010162 // CCG010249 // CCG003114 // CCG009614 // CCG009055 // CCG010572 // CCG007966 // CCG027659 // CCG025457 // CCG009987 // CCG027656 // CCG027657 // CCG010498 // CCG027655 // CCG005865 // CCG015748 // CCG008719 // CCG029372 // CCG025450 // CCG015392 // CCG027034 // CCG012171 // CCG001654 // CCG001655 // CCG001651 // CCG012443 // CCG006059 // CCG019666 // CCG006214 // CCG006455 // CCG014…
GO:0004672	F	protein kinase activity	423	4834	1657	23397	2.4e-06	0.00027	// CCG010162 // CCG010249 // CCG020347 // CCG023938 // CCG020226 // CCG017622 // CCG003320 // CCG022798 // CCG007492 // CCG007493 // CCG022793 // CCG007496 // CCG007495 // CCG008811 // CCG014610 // CCG015748 // CCG015740 // CCG029372 // CCG012982 // CCG012983 // CCG027906 // CCG020929 // CCG018924 // CCG026782 // CCG025966 // CCG008250 // CCG019272 // CCG021404 // CCG009324 // CCG009322 // CCG021…
GO:0015291	F	secondary active transmembrane transporter activity	102	4834	321	23397	2.4e-06	0.00027	// CCG008438 // CCG008437 // CCG023733 // CCG009915 // CCG009914 // CCG005228 // CCG005227 // CCG012415 // CCG023648 // CCG023647 // CCG011749 // CCG020044 // CCG017655 // CCG010817 // CCG006187 // CCG024623 // CCG022009 // CCG025296 // CCG025297 // CCG015144 // CCG028145 // CCG022740 // CCG005128 // CCG009733 // CCG008885 // CCG014797 // CCG006524 // CCG011490 // CCG008312 // CCG023810 // CCG004…
GO:0051213	F	dioxygenase activity	69	4834	198	23397	2.9e-06	0.00032	// CCG018296 // CCG025022 // CCG012127 // CCG007247 // CCG018552 // CCG024429 // CCG026636 // CCG004139 // CCG020054 // CCG025608 // CCG026875 // CCG026874 // CCG018295 // CCG006769 // CCG008984 // CCG025605 // CCG000746 // CCG026084 // CCG025626 // CCG026740 // CCG029286 // CCG022911 // CCG013081 // CCG012124 // CCG012125 // CCG012126 // CCG000551 // CCG004712 // CCG012123 // CCG014856 // CCG018…
GO:0016798	F	hydrolase activity, acting on glycosyl bonds	152	4834	521	23397	3.4e-06	0.00036	// CCG008530 // CCG001719 // CCG001431 // CCG023731 // CCG007204 // CCG010968 // CCG009854 // CCG016913 // CCG006660 // CCG003629 // CCG000289 // CCG012317 // CCG012993 // CCG016792 // CCG028619 // CCG027829 // CCG004058 // CCG009115 // CCG012391 // CCG012390 // CCG008381 // CCG009742 // CCG025755 // CCG008389 // CCG020047 // CCG017349 // CCG006659 // CCG025617 // CCG017554 // CCG017552 // CCG023…
GO:0038023	F	signaling receptor activity	103	4834	328	23397	3.9e-06	0.0004	// CCG010162 // CCG010249 // CCG015392 // CCG009614 // CCG009055 // CCG010572 // CCG007966 // CCG027659 // CCG025457 // CCG009987 // CCG027656 // CCG027657 // CCG010498 // CCG027655 // CCG005865 // CCG015748 // CCG008719 // CCG029372 // CCG025450 // CCG027034 // CCG012171 // CCG001654 // CCG001655 // CCG001651 // CCG012443 // CCG006059 // CCG019666 // CCG006214 // CCG006455 // CCG014154 // CCG017…
GO:0016684	F	oxidoreductase activity, acting on peroxide as acceptor	61	4834	171	23397	4.5e-06	0.00045	// CCG029399 // CCG025022 // CCG003929 // CCG020659 // CCG008824 // CCG013938 // CCG000339 // CCG000922 // CCG009430 // CCG014691 // CCG027642 // CCG003129 // CCG002895 // CCG002894 // CCG002897 // CCG016480 // CCG002899 // CCG009931 // CCG007761 // CCG000125 // CCG003932 // CCG024752 // CCG003934 // CCG002580 // CCG005419 // CCG020952 // CCG027840 // CCG014370 // CCG020955 // CCG020408 // CCG008…
GO:0004601	F	peroxidase activity	61	4834	171	23397	4.5e-06	0.00045	// CCG029399 // CCG025022 // CCG003929 // CCG020659 // CCG008824 // CCG013938 // CCG000339 // CCG000922 // CCG009430 // CCG014691 // CCG027642 // CCG003129 // CCG002895 // CCG002894 // CCG002897 // CCG016480 // CCG002899 // CCG009931 // CCG007761 // CCG000125 // CCG003932 // CCG024752 // CCG003934 // CCG002580 // CCG005419 // CCG020952 // CCG027840 // CCG014370 // CCG020955 // CCG020408 // CCG008…
GO:0015238	F	drug transmembrane transporter activity	37	4834	89	23397	6.5e-06	0.00061	// CCG028344 // CCG008292 // CCG014881 // CCG014882 // CCG028145 // CCG001823 // CCG001822 // CCG024778 // CCG008451 // CCG019849 // CCG006605 // CCG024008 // CCG009915 // CCG009914 // CCG016291 // CCG021888 // CCG028342 // CCG015144 // CCG008294 // CCG015461 // CCG010599 // CCG028394 // CCG007593 // CCG027670 // CCG023810 // CCG000818 // CCG009064 // CCG017655 // CCG014709 // CCG012205 // CCG012…
GO:0090484	F	drug transporter activity	37	4834	89	23397	6.5e-06	0.00061	// CCG028344 // CCG008292 // CCG014881 // CCG014882 // CCG028145 // CCG001823 // CCG001822 // CCG024778 // CCG008451 // CCG019849 // CCG006605 // CCG024008 // CCG009915 // CCG009914 // CCG016291 // CCG021888 // CCG028342 // CCG015144 // CCG008294 // CCG015461 // CCG010599 // CCG028394 // CCG007593 // CCG027670 // CCG023810 // CCG000818 // CCG009064 // CCG017655 // CCG014709 // CCG012205 // CCG012…
GO:0030246	F	carbohydrate binding	144	4834	500	23397	1.2e-05	0.0011	// CCG008530 // CCG001431 // CCG014271 // CCG007204 // CCG023842 // CCG009854 // CCG016913 // CCG010801 // CCG010802 // CCG012317 // CCG001340 // CCG026203 // CCG012391 // CCG022793 // CCG005961 // CCG010497 // CCG026433 // CCG014088 // CCG025755 // CCG029246 // CCG014087 // CCG008250 // CCG021470 // CCG008712 // CCG008713 // CCG014457 // CCG023728 // CCG024744 // CCG012982 // CCG012983 // CCG025…
GO:0008422	F	beta-glucosidase activity	33	4834	78	23397	1.3e-05	0.0012	// CCG008394 // CCG008395 // CCG008390 // CCG008391 // CCG008393 // CCG006113 // CCG005961 // CCG005166 // CCG019660 // CCG010431 // CCG028619 // CCG028713 // CCG028633 // CCG026433 // CCG024460 // CCG022386 // CCG025755 // CCG008389 // CCG020047 // CCG017349 // CCG016941 // CCG008619 // CCG021897 // CCG006574 // CCG024859 // CCG028620 // CCG006937 // CCG013978 // CCG023121 // CCG001531 // CCG006…
GO:0016301	F	kinase activity	544	4834	2216	23397	1.3e-05	0.0012	// CCG010162 // CCG021211 // CCG010249 // CCG020347 // CCG023938 // CCG020226 // CCG017622 // CCG007060 // CCG003320 // CCG022798 // CCG007492 // CCG007493 // CCG022793 // CCG007496 // CCG007495 // CCG003101 // CCG008811 // CCG003265 // CCG005637 // CCG014610 // CCG015748 // CCG015740 // CCG029372 // CCG012982 // CCG012983 // CCG004892 // CCG027906 // CCG017981 // CCG018924 // CCG016586 // CCG026…
GO:0005506	F	iron ion binding	136	4834	469	23397	1.4e-05	0.0012	// CCG014539 // CCG000928 // CCG001423 // CCG025722 // CCG028164 // CCG014777 // CCG013505 // CCG010372 // CCG013506 // CCG011603 // CCG025129 // CCG027828 // CCG028448 // CCG012061 // CCG012060 // CCG012062 // CCG029776 // CCG013095 // CCG013094 // CCG028446 // CCG028447 // CCG028444 // CCG029583 // CCG015547 // CCG008814 // CCG010148 // CCG005636 // CCG023093 // CCG015473 // CCG008893 // CCG013…
GO:0015926	F	glucosidase activity	38	4834	97	23397	2.5e-05	0.0021	// CCG008394 // CCG008395 // CCG008390 // CCG008391 // CCG008393 // CCG006113 // CCG005961 // CCG023717 // CCG005166 // CCG018559 // CCG006019 // CCG019660 // CCG010431 // CCG015718 // CCG028713 // CCG028633 // CCG026433 // CCG028619 // CCG024460 // CCG022386 // CCG025755 // CCG008389 // CCG020047 // CCG017349 // CCG016941 // CCG008619 // CCG017412 // CCG021897 // CCG006574 // CCG024859 // CCG028…
GO:0004185	F	serine-type carboxypeptidase activity	24	4834	52	23397	3.4e-05	0.0028	// CCG000215 // CCG018819 // CCG026977 // CCG005909 // CCG006768 // CCG021197 // CCG017567 // CCG002050 // CCG029561 // CCG005320 // CCG017524 // CCG017523 // CCG017522 // CCG015978 // CCG022577 // CCG010651 // CCG009168 // CCG017519 // CCG004541 // CCG017521 // CCG017513 // CCG001005 // CCG018824 // CCG009167
GO:0004714	F	transmembrane receptor protein tyrosine kinase activity	37	4834	95	23397	3.7e-05	0.0029	// CCG001654 // CCG001655 // CCG002122 // CCG024793 // CCG006059 // CCG006509 // CCG014626 // CCG016488 // CCG004152 // CCG004150 // CCG014133 // CCG012094 // CCG014154 // CCG011027 // CCG001364 // CCG017999 // CCG027362 // CCG001697 // CCG024868 // CCG029221 // CCG021398 // CCG012848 // CCG006510 // CCG010690 // CCG008719 // CCG003847 // CCG022991 // CCG009256 // CCG008321 // CCG025450 // CCG007…
GO:0003854	F	3-beta-hydroxy-delta5-steroid dehydrogenase activity	15	4834	26	23397	4e-05	0.0031	// CCG024890 // CCG007252 // CCG006636 // CCG009942 // CCG006638 // CCG013545 // CCG013544 // CCG006644 // CCG029661 // CCG004975 // CCG006643 // CCG017431 // CCG010959 // CCG010958 // CCG028559
GO:0008447	F	L-ascorbate oxidase activity	13	4834	21	23397	4.7e-05	0.0036	// CCG024384 // CCG004937 // CCG000431 // CCG025686 // CCG025685 // CCG004938 // CCG025688 // CCG001199 // CCG016240 // CCG015101 // CCG016829 // CCG024194 // CCG016241
GO:0070008	F	serine-type exopeptidase activity	25	4834	56	23397	4.7e-05	0.0036	// CCG000215 // CCG018819 // CCG026977 // CCG005909 // CCG006768 // CCG021197 // CCG017567 // CCG002050 // CCG029561 // CCG005320 // CCG017524 // CCG017523 // CCG017522 // CCG015978 // CCG009467 // CCG022577 // CCG010651 // CCG009168 // CCG017519 // CCG004541 // CCG017521 // CCG017513 // CCG001005 // CCG018824 // CCG009167
GO:0033764	F	steroid dehydrogenase activity, acting on the CH-OH group of donors, NAD or NADP as acceptor	22	4834	47	23397	5.5e-05	0.0041	// CCG024890 // CCG006644 // CCG004975 // CCG006643 // CCG013545 // CCG013544 // CCG018508 // CCG007252 // CCG010959 // CCG010958 // CCG000247 // CCG028559 // CCG008007 // CCG009942 // CCG008009 // CCG015272 // CCG015274 // CCG006636 // CCG008008 // CCG029661 // CCG006638 // CCG017431
GO:0005057	F	receptor signaling protein activity	61	4834	184	23397	5.7e-05	0.0041	// CCG010697 // CCG010162 // CCG001770 // CCG026782 // CCG022572 // CCG006513 // CCG025966 // CCG028304 // CCG022789 // CCG019272 // CCG007782 // CCG021404 // CCG010691 // CCG005973 // CCG015764 // CCG027294 // CCG021402 // CCG014831 // CCG027849 // CCG027848 // CCG027861 // CCG027845 // CCG024864 // CCG016402 // CCG017674 // CCG021399 // CCG002013 // CCG005241 // CCG007989 // CCG022568 // CCG018…
GO:0004702	F	receptor signaling protein serine/threonine kinase activity	61	4834	184	23397	5.7e-05	0.0041	// CCG010697 // CCG010162 // CCG001770 // CCG026782 // CCG022572 // CCG006513 // CCG025966 // CCG028304 // CCG022789 // CCG019272 // CCG007782 // CCG021404 // CCG010691 // CCG005973 // CCG015764 // CCG027294 // CCG021402 // CCG014831 // CCG027849 // CCG027848 // CCG027861 // CCG027845 // CCG024864 // CCG016402 // CCG017674 // CCG021399 // CCG002013 // CCG005241 // CCG007989 // CCG022568 // CCG018…
GO:0016773	F	phosphotransferase activity, alcohol group as acceptor	446	4834	1815	23397	5.9e-05	0.0041	// CCG010162 // CCG010249 // CCG020347 // CCG023938 // CCG020226 // CCG017622 // CCG003320 // CCG022798 // CCG007492 // CCG007493 // CCG022793 // CCG007496 // CCG007495 // CCG008811 // CCG014610 // CCG015748 // CCG015740 // CCG029372 // CCG012982 // CCG012983 // CCG027906 // CCG020929 // CCG018924 // CCG016586 // CCG026782 // CCG014311 // CCG028304 // CCG019272 // CCG021404 // CCG009324 // CCG009…
GO:0004709	F	MAP kinase kinase kinase activity	56	4834	166	23397	6.5e-05	0.0045	// CCG010697 // CCG010162 // CCG001770 // CCG026782 // CCG022572 // CCG006513 // CCG025966 // CCG028304 // CCG022789 // CCG019272 // CCG021404 // CCG010691 // CCG005973 // CCG015764 // CCG014831 // CCG027849 // CCG027848 // CCG027861 // CCG027845 // CCG024864 // CCG016402 // CCG021399 // CCG002013 // CCG005241 // CCG007989 // CCG022568 // CCG018979 // CCG020347 // CCG022797 // CCG029122 // CCG025…
GO:0016709	F	oxidoreductase activity, acting on paired donors, with incorporation or reduction of molecular oxygen, NAD(P)H as one donor, and incorporation of one atom of oxygen	81	4834	264	23397	9e-05	0.006	// CCG008411 // CCG029775 // CCG021953 // CCG000928 // CCG001458 // CCG026399 // CCG006039 // CCG007613 // CCG012289 // CCG028164 // CCG002623 // CCG024352 // CCG013095 // CCG000886 // CCG010036 // CCG017649 // CCG005089 // CCG012291 // CCG005515 // CCG006589 // CCG012290 // CCG015426 // CCG027991 // CCG006583 // CCG025129 // CCG006584 // CCG028653 // CCG028652 // CCG012062 // CCG012061 // CCG018…
GO:0016682	F	oxidoreductase activity, acting on diphenols and related substances as donors, oxygen as acceptor	29	4834	71	23397	9e-05	0.006	// CCG010481 // CCG025686 // CCG025685 // CCG010482 // CCG004938 // CCG025688 // CCG016918 // CCG026285 // CCG001199 // CCG015101 // CCG016829 // CCG010478 // CCG000431 // CCG010470 // CCG010471 // CCG024194 // CCG004937 // CCG020005 // CCG024384 // CCG022587 // CCG022586 // CCG002555 // CCG026210 // CCG010715 // CCG002538 // CCG016241 // CCG016240 // CCG002536 // CCG002537
GO:0000988	F	transcription factor activity, protein binding	85	4834	282	23397	0.00012	0.0079	// CCG019253 // CCG014609 // CCG022748 // CCG028301 // CCG011090 // CCG016614 // CCG001779 // CCG019727 // CCG018983 // CCG024452 // CCG024164 // CCG012589 // CCG011910 // CCG016325 // CCG005163 // CCG013728 // CCG025233 // CCG014771 // CCG005004 // CCG014621 // CCG003853 // CCG016610 // CCG023718 // CCG020280 // CCG029549 // CCG021684 // CCG005647 // CCG002733 // CCG004093 // CCG004092 // CCG004…
GO:0000989	F	transcription factor activity, transcription factor binding	82	4834	271	23397	0.00014	0.0087	// CCG019253 // CCG014609 // CCG022748 // CCG028301 // CCG011090 // CCG016614 // CCG001779 // CCG019727 // CCG018983 // CCG024452 // CCG024164 // CCG012589 // CCG011910 // CCG005163 // CCG013728 // CCG025233 // CCG014771 // CCG005004 // CCG014621 // CCG003853 // CCG016610 // CCG023718 // CCG020280 // CCG029549 // CCG021684 // CCG005647 // CCG005785 // CCG004093 // CCG004092 // CCG004090 // CCG009…
GO:0016634	F	oxidoreductase activity, acting on the CH-CH group of donors, oxygen as acceptor	18	4834	37	23397	0.00014	0.0088	// CCG013505 // CCG001426 // CCG014320 // CCG014318 // CCG001423 // CCG018236 // CCG028446 // CCG013506 // CCG028448 // CCG026340 // CCG010148 // CCG008319 // CCG024927 // CCG021008 // CCG000169 // CCG013267 // CCG028918 // CCG004918
GO:0004674	F	protein serine/threonine kinase activity	322	4834	1288	23397	0.00015	0.009	// CCG010162 // CCG010249 // CCG020347 // CCG027930 // CCG014639 // CCG014271 // CCG019217 // CCG023938 // CCG020226 // CCG017028 // CCG010691 // CCG017027 // CCG017622 // CCG000476 // CCG014293 // CCG001209 // CCG021460 // CCG010801 // CCG023838 // CCG001839 // CCG014831 // CCG025485 // CCG001340 // CCG029182 // CCG010802 // CCG023405 // CCG010450 // CCG017705 // CCG008245 // CCG022798 // CCG009…
GO:0022857	F	transmembrane transporter activity	378	4834	1535	23397	0.00016	0.0095	// CCG024993 // CCG000650 // CCG012311 // CCG005413 // CCG028052 // CCG005228 // CCG005227 // CCG005220 // CCG024421 // CCG009427 // CCG020044 // CCG013292 // CCG014613 // CCG000404 // CCG022165 // CCG016667 // CCG029479 // CCG026235 // CCG022361 // CCG022009 // CCG001336 // CCG003662 // CCG029253 // CCG029254 // CCG025747 // CCG014259 // CCG005128 // CCG009733 // CCG008885 // CCG014464 // CCG005…
GO:0022804	F	active transmembrane transporter activity	166	4834	620	23397	0.00019	0.012	// CCG024993 // CCG008438 // CCG008437 // CCG008294 // CCG000650 // CCG023733 // CCG024434 // CCG009915 // CCG009914 // CCG005413 // CCG029349 // CCG010078 // CCG027939 // CCG005228 // CCG005227 // CCG012415 // CCG003205 // CCG003204 // CCG023648 // CCG023647 // CCG011307 // CCG011749 // CCG020044 // CCG025252 // CCG025835 // CCG017655 // CCG029728 // CCG022165 // CCG016667 // CCG022368 // CCG003…
GO:0016209	F	antioxidant activity	74	4834	244	23397	0.00026	0.015	// CCG029399 // CCG025022 // CCG004818 // CCG020659 // CCG008824 // CCG009436 // CCG000339 // CCG000922 // CCG009430 // CCG024748 // CCG027642 // CCG003129 // CCG002895 // CCG002894 // CCG002897 // CCG016480 // CCG002899 // CCG009931 // CCG020660 // CCG000125 // CCG003932 // CCG024752 // CCG003934 // CCG002580 // CCG024806 // CCG005419 // CCG027865 // CCG020952 // CCG027840 // CCG013938 // CCG014…
GO:0045486	F	naringenin 3-dioxygenase activity	10	4834	16	23397	0.00033	0.019	// CCG012130 // CCG012129 // CCG012124 // CCG012125 // CCG012126 // CCG012127 // CCG012123 // CCG012134 // CCG013321 // CCG013320
GO:0008083	F	growth factor activity	5	4834	5	23397	0.00038	0.022	// CCG017538 // CCG027371 // CCG007265 // CCG008835 // CCG008153
GO:0003777	F	microtubule motor activity	30	4834	80	23397	0.00041	0.023	// CCG000755 // CCG001961 // CCG014198 // CCG000869 // CCG022236 // CCG018269 // CCG019826 // CCG027014 // CCG013015 // CCG029460 // CCG002427 // CCG023793 // CCG007519 // CCG028291 // CCG019434 // CCG002507 // CCG001745 // CCG021822 // CCG001853 // CCG003486 // CCG027205 // CCG001305 // CCG005808 // CCG028314 // CCG004127 // CCG022733 // CCG026408 // CCG028539 // CCG013086 // CCG028241
GO:0004180	F	carboxypeptidase activity	27	4834	70	23397	0.00047	0.026	// CCG000215 // CCG018819 // CCG026977 // CCG005909 // CCG006768 // CCG021197 // CCG017567 // CCG002050 // CCG029561 // CCG005320 // CCG017524 // CCG017523 // CCG017522 // CCG015978 // CCG015394 // CCG015393 // CCG022577 // CCG021891 // CCG010651 // CCG009168 // CCG017519 // CCG004541 // CCG017521 // CCG017513 // CCG001005 // CCG018824 // CCG009167
GO:0016229	F	steroid dehydrogenase activity	22	4834	53	23397	0.00047	0.026	// CCG024890 // CCG006644 // CCG004975 // CCG006643 // CCG013545 // CCG013544 // CCG018508 // CCG007252 // CCG010959 // CCG010958 // CCG000247 // CCG028559 // CCG008007 // CCG009942 // CCG008009 // CCG015272 // CCG015274 // CCG006636 // CCG008008 // CCG029661 // CCG006638 // CCG017431
GO:0016760	F	cellulose synthase (UDP-forming) activity	17	4834	37	23397	0.0005	0.027	// CCG008145 // CCG012924 // CCG013954 // CCG001916 // CCG007526 // CCG001918 // CCG004057 // CCG025716 // CCG001917 // CCG029132 // CCG004097 // CCG027589 // CCG025019 // CCG013409 // CCG025717 // CCG010767 // CCG010740
GO:0016759	F	cellulose synthase activity	17	4834	37	23397	0.0005	0.027	// CCG008145 // CCG012924 // CCG013954 // CCG001916 // CCG007526 // CCG001918 // CCG004057 // CCG025716 // CCG001917 // CCG029132 // CCG004097 // CCG027589 // CCG025019 // CCG013409 // CCG025717 // CCG010767 // CCG010740
GO:0001067	F	regulatory region nucleic acid binding	109	4834	394	23397	0.00061	0.031	// CCG013954 // CCG025717 // CCG015283 // CCG026635 // CCG013666 // CCG012589 // CCG014771 // CCG004227 // CCG003853 // CCG002874 // CCG004057 // CCG007048 // CCG011606 // CCG016014 // CCG007047 // CCG012793 // CCG010767 // CCG004693 // CCG021824 // CCG004694 // CCG004697 // CCG000934 // CCG016450 // CCG028607 // CCG027831 // CCG014696 // CCG024621 // CCG026338 // CCG003217 // CCG022748 // CCG008…
GO:0000975	F	regulatory region DNA binding	109	4834	394	23397	0.00061	0.031	// CCG013954 // CCG025717 // CCG015283 // CCG026635 // CCG013666 // CCG012589 // CCG014771 // CCG004227 // CCG003853 // CCG002874 // CCG004057 // CCG007048 // CCG011606 // CCG016014 // CCG007047 // CCG012793 // CCG010767 // CCG004693 // CCG021824 // CCG004694 // CCG004697 // CCG000934 // CCG016450 // CCG028607 // CCG027831 // CCG014696 // CCG024621 // CCG026338 // CCG003217 // CCG022748 // CCG008…
GO:0044212	F	transcription regulatory region DNA binding	109	4834	394	23397	0.00061	0.031	// CCG013954 // CCG025717 // CCG015283 // CCG026635 // CCG013666 // CCG012589 // CCG014771 // CCG004227 // CCG003853 // CCG002874 // CCG004057 // CCG007048 // CCG011606 // CCG016014 // CCG007047 // CCG012793 // CCG010767 // CCG004693 // CCG021824 // CCG004694 // CCG004697 // CCG000934 // CCG016450 // CCG028607 // CCG027831 // CCG014696 // CCG024621 // CCG026338 // CCG003217 // CCG022748 // CCG008…
GO:0015297	F	antiporter activity	54	4834	172	23397	0.00065	0.033	// CCG003497 // CCG008292 // CCG014881 // CCG008438 // CCG014882 // CCG008437 // CCG002128 // CCG025252 // CCG025253 // CCG001823 // CCG001822 // CCG024778 // CCG008885 // CCG008451 // CCG005121 // CCG028870 // CCG028877 // CCG006605 // CCG009915 // CCG009914 // CCG028584 // CCG021888 // CCG028342 // CCG015144 // CCG008294 // CCG015461 // CCG028406 // CCG010599 // CCG028394 // CCG005228 // CCG005…
GO:0016679	F	oxidoreductase activity, acting on diphenols and related substances as donors	30	4834	82	23397	0.00067	0.033	// CCG010481 // CCG025686 // CCG025685 // CCG010482 // CCG004938 // CCG025688 // CCG016918 // CCG026285 // CCG001199 // CCG015101 // CCG016829 // CCG010478 // CCG000431 // CCG010470 // CCG010471 // CCG028671 // CCG024194 // CCG004937 // CCG020005 // CCG024384 // CCG022587 // CCG022586 // CCG002555 // CCG026210 // CCG010715 // CCG002538 // CCG016241 // CCG016240 // CCG002536 // CCG002537
GO:1901682	F	sulfur compound transmembrane transporter activity	16	4834	35	23397	0.00077	0.038	// CCG027670 // CCG004366 // CCG004934 // CCG024142 // CCG009640 // CCG005539 // CCG004245 // CCG006402 // CCG020044 // CCG019713 // CCG013172 // CCG005047 // CCG005046 // CCG004933 // CCG029206 // CCG012596
GO:0016857	F	racemase and epimerase activity, acting on carbohydrates and derivatives	15	4834	32	23397	0.00081	0.04	// CCG005292 // CCG005293 // CCG005209 // CCG013446 // CCG010497 // CCG011313 // CCG009634 // CCG009705 // CCG015066 // CCG005004 // CCG009635 // CCG015490 // CCG015492 // CCG000038 // CCG017432
GO:0047215	F	indole-3-acetate beta-glucosyltransferase activity	7	4834	10	23397	0.0011	0.051	// CCG024397 // CCG024399 // CCG024402 // CCG024403 // CCG024400 // CCG024401 // CCG019329
GO:0008374	F	O-acyltransferase activity	48	4834	153	23397	0.0013	0.06	// CCG001869 // CCG018228 // CCG000639 // CCG000638 // CCG005592 // CCG011914 // CCG022668 // CCG016482 // CCG027292 // CCG009779 // CCG011867 // CCG008496 // CCG004055 // CCG020745 // CCG012318 // CCG000475 // CCG000474 // CCG011411 // CCG011413 // CCG010741 // CCG006787 // CCG024886 // CCG024885 // CCG020372 // CCG001870 // CCG001871 // CCG004841 // CCG004842 // CCG020480 // CCG023466 // CCG022…
GO:0016707	F	gibberellin 3-beta-dioxygenase activity	11	4834	21	23397	0.0013	0.06	// CCG026084 // CCG003044 // CCG002155 // CCG027837 // CCG000551 // CCG018294 // CCG026446 // CCG018302 // CCG024643 // CCG017478 // CCG018293
GO:0102483	F	scopolin beta-glucosidase activity	14	4834	30	23397	0.0013	0.06	// CCG008394 // CCG008395 // CCG028619 // CCG024460 // CCG008391 // CCG008393 // CCG024859 // CCG008389 // CCG028620 // CCG020047 // CCG013978 // CCG006932 // CCG008390 // CCG006937
GO:0016722	F	oxidoreductase activity, oxidizing metal ions	25	4834	67	23397	0.0013	0.06	// CCG027144 // CCG004938 // CCG014318 // CCG025685 // CCG010482 // CCG025688 // CCG026285 // CCG001199 // CCG015101 // CCG016829 // CCG029233 // CCG000431 // CCG010470 // CCG010471 // CCG025686 // CCG004937 // CCG014320 // CCG015761 // CCG008616 // CCG028597 // CCG024384 // CCG026210 // CCG002538 // CCG016241 // CCG016240
GO:0050321	F	tau-protein kinase activity	8	4834	13	23397	0.0016	0.071	// CCG009319 // CCG013037 // CCG024809 // CCG009661 // CCG017722 // CCG017622 // CCG002935 // CCG020998
GO:0016899	F	oxidoreductase activity, acting on the CH-OH group of donors, oxygen as acceptor	14	4834	31	23397	0.0019	0.084	// CCG003683 // CCG003419 // CCG007175 // CCG012962 // CCG012574 // CCG009418 // CCG021733 // CCG014449 // CCG026724 // CCG013974 // CCG015674 // CCG014455 // CCG003755 // CCG003754
GO:0045552	F	dihydrokaempferol 4-reductase activity	10	4834	19	23397	0.0021	0.091	// CCG000218 // CCG016978 // CCG006636 // CCG006638 // CCG006644 // CCG027277 // CCG006643 // CCG017431 // CCG010959 // CCG010958
GO:0004857	F	enzyme inhibitor activity	42	4834	133	23397	0.0021	0.093	// CCG027448 // CCG029179 // CCG029178 // CCG019828 // CCG019829 // CCG009184 // CCG026807 // CCG015488 // CCG015489 // CCG021682 // CCG021681 // CCG019827 // CCG027450 // CCG027451 // CCG015406 // CCG026203 // CCG012089 // CCG019833 // CCG000006 // CCG021678 // CCG021679 // CCG029469 // CCG024197 // CCG026417 // CCG021378 // CCG022403 // CCG017461 // CCG011322 // CCG012821 // CCG009378 // CCG019…
GO:0015149	F	hexose transmembrane transporter activity	23	4834	62	23397	0.0022	0.093	// CCG011490 // CCG025423 // CCG025421 // CCG001178 // CCG011749 // CCG012415 // CCG028376 // CCG023648 // CCG023647 // CCG011903 // CCG014555 // CCG017035 // CCG017034 // CCG017036 // CCG017031 // CCG009399 // CCG010817 // CCG024623 // CCG000019 // CCG027542 // CCG011750 // CCG025296 // CCG025297
GO:0005355	F	glucose transmembrane transporter activity	23	4834	62	23397	0.0022	0.093	// CCG011490 // CCG025423 // CCG025421 // CCG001178 // CCG011749 // CCG012415 // CCG028376 // CCG023648 // CCG023647 // CCG011903 // CCG014555 // CCG017035 // CCG017034 // CCG017036 // CCG017031 // CCG009399 // CCG010817 // CCG024623 // CCG000019 // CCG027542 // CCG011750 // CCG025296 // CCG025297
GO:0004675	F	transmembrane receptor protein serine/threonine kinase activity	49	4834	162	23397	0.0026	0.11	// CCG001654 // CCG001655 // CCG010162 // CCG001770 // CCG010249 // CCG008516 // CCG012443 // CCG023750 // CCG007610 // CCG003955 // CCG017663 // CCG019666 // CCG014116 // CCG006214 // CCG024868 // CCG026365 // CCG009055 // CCG010572 // CCG007966 // CCG007989 // CCG016677 // CCG027362 // CCG001157 // CCG007590 // CCG009614 // CCG029372 // CCG009987 // CCG020332 // CCG003121 // CCG018254 // CCG010…
GO:0015145	F	monosaccharide transmembrane transporter activity	23	4834	63	23397	0.0028	0.12	// CCG011490 // CCG025423 // CCG025421 // CCG001178 // CCG011749 // CCG012415 // CCG028376 // CCG023648 // CCG023647 // CCG011903 // CCG014555 // CCG017035 // CCG017034 // CCG017036 // CCG017031 // CCG009399 // CCG010817 // CCG024623 // CCG000019 // CCG027542 // CCG011750 // CCG025296 // CCG025297
GO:0022891	F	substrate-specific transmembrane transporter activity	257	4834	1059	23397	0.003	0.12	// CCG002287 // CCG008438 // CCG028145 // CCG025684 // CCG020458 // CCG008437 // CCG001883 // CCG015289 // CCG019046 // CCG008651 // CCG023733 // CCG024434 // CCG009345 // CCG007200 // CCG007651 // CCG027655 // CCG020751 // CCG016848 // CCG012311 // CCG005413 // CCG016567 // CCG007043 // CCG027981 // CCG010078 // CCG012792 // CCG025127 // CCG005227 // CCG008931 // CCG023219 // CCG027659 // CCG023…
GO:0008017	F	microtubule binding	38	4834	120	23397	0.0032	0.13	// CCG000755 // CCG001961 // CCG014198 // CCG000869 // CCG022434 // CCG022236 // CCG015041 // CCG006431 // CCG018269 // CCG027612 // CCG027014 // CCG013015 // CCG006359 // CCG002427 // CCG023793 // CCG007519 // CCG028291 // CCG019434 // CCG002507 // CCG001745 // CCG005808 // CCG027205 // CCG002790 // CCG001305 // CCG029460 // CCG028314 // CCG004127 // CCG003486 // CCG007480 // CCG022733 // CCG010…
GO:0042285	F	xylosyltransferase activity	10	4834	20	23397	0.0034	0.13	// CCG029057 // CCG018955 // CCG001836 // CCG000351 // CCG026727 // CCG026490 // CCG029580 // CCG025268 // CCG004468 // CCG019760
GO:0005199	F	structural constituent of cell wall	10	4834	20	23397	0.0034	0.13	// CCG007256 // CCG022784 // CCG022783 // CCG009556 // CCG000394 // CCG000390 // CCG000391 // CCG000392 // CCG026898 // CCG010085
GO:0042973	F	glucan endo-1,3-beta-D-glucosidase activity	15	4834	36	23397	0.0034	0.14	// CCG005166 // CCG026433 // CCG021897 // CCG025755 // CCG006113 // CCG005961 // CCG028633 // CCG022386 // CCG017349 // CCG023121 // CCG016941 // CCG019660 // CCG008619 // CCG017412 // CCG010431
GO:0016740	F	transferase activity	1199	4834	5369	23397	0.0037	0.14	// CCG016409 // CCG010162 // CCG021211 // CCG010249 // CCG020347 // CCG021443 // CCG023938 // CCG020226 // CCG020349 // CCG017622 // CCG007060 // CCG012313 // CCG005411 // CCG004055 // CCG005541 // CCG003320 // CCG012318 // CCG024650 // CCG004058 // CCG022798 // CCG010888 // CCG001844 // CCG008647 // CCG010767 // CCG007492 // CCG007493 // CCG025309 // CCG007496 // CCG007495 // CCG024428 // CCG003…
GO:0016413	F	O-acetyltransferase activity	31	4834	94	23397	0.0037	0.14	// CCG001869 // CCG018228 // CCG000639 // CCG000638 // CCG005592 // CCG011914 // CCG027292 // CCG024477 // CCG008496 // CCG013229 // CCG000475 // CCG000474 // CCG011411 // CCG011413 // CCG010741 // CCG006787 // CCG024886 // CCG024885 // CCG020372 // CCG001870 // CCG001871 // CCG022189 // CCG022188 // CCG021315 // CCG021314 // CCG002729 // CCG002728 // CCG013231 // CCG020888 // CCG020921 // CCG027…
GO:0050505	F	hydroquinone glucosyltransferase activity	6	4834	9	23397	0.0037	0.14	// CCG018863 // CCG018862 // CCG018861 // CCG018864 // CCG018643 // CCG018642
GO:0003677	F	DNA binding	501	4834	2164	23397	0.0038	0.14	// CCG021211 // CCG014771 // CCG002874 // CCG004057 // CCG029506 // CCG012310 // CCG006436 // CCG010888 // CCG027638 // CCG028757 // CCG010767 // CCG027637 // CCG024908 // CCG024428 // CCG013808 // CCG008424 // CCG008423 // CCG008818 // CCG005635 // CCG012824 // CCG022004 // CCG011941 // CCG027831 // CCG026238 // CCG016669 // CCG029573 // CCG020926 // CCG017989 // CCG003217 // CCG012269 // CCG006…
GO:0015294	F	solute:cation symporter activity	25	4834	72	23397	0.004	0.15	// CCG011490 // CCG008312 // CCG025423 // CCG025421 // CCG001178 // CCG011749 // CCG012415 // CCG028376 // CCG023648 // CCG003249 // CCG023647 // CCG011903 // CCG014555 // CCG017035 // CCG017034 // CCG017036 // CCG017031 // CCG009399 // CCG010817 // CCG024623 // CCG000019 // CCG027542 // CCG011750 // CCG025296 // CCG025297
GO:0004650	F	polygalacturonase activity	18	4834	47	23397	0.0043	0.16	// CCG007516 // CCG011067 // CCG013203 // CCG023823 // CCG011068 // CCG023731 // CCG007783 // CCG005376 // CCG006208 // CCG020329 // CCG010968 // CCG024001 // CCG026556 // CCG019784 // CCG006659 // CCG013179 // CCG006660 // CCG019782
GO:0051119	F	sugar transmembrane transporter activity	31	4834	95	23397	0.0044	0.16	// CCG013400 // CCG011490 // CCG002191 // CCG025423 // CCG025421 // CCG001178 // CCG011749 // CCG012415 // CCG028376 // CCG001381 // CCG001382 // CCG001383 // CCG023648 // CCG023647 // CCG011903 // CCG020233 // CCG014555 // CCG017035 // CCG017034 // CCG017036 // CCG017031 // CCG009399 // CCG029479 // CCG010817 // CCG024623 // CCG000019 // CCG027542 // CCG011750 // CCG029152 // CCG025296 // CCG025…
GO:0015295	F	solute:proton symporter activity	24	4834	69	23397	0.0047	0.17	// CCG011490 // CCG008312 // CCG025423 // CCG025421 // CCG001178 // CCG011749 // CCG012415 // CCG028376 // CCG023648 // CCG023647 // CCG011903 // CCG014555 // CCG017035 // CCG017034 // CCG017036 // CCG017031 // CCG009399 // CCG010817 // CCG024623 // CCG000019 // CCG027542 // CCG011750 // CCG025296 // CCG025297
GO:0016840	F	carbon-nitrogen lyase activity	11	4834	24	23397	0.005	0.18	// CCG012235 // CCG009757 // CCG008128 // CCG011983 // CCG026372 // CCG010264 // CCG025597 // CCG008474 // CCG004133 // CCG005934 // CCG008795
GO:0050660	F	flavin adenine dinucleotide binding	62	4834	220	23397	0.005	0.18	// CCG001242 // CCG027310 // CCG026399 // CCG006039 // CCG010963 // CCG022649 // CCG007175 // CCG017649 // CCG000169 // CCG013267 // CCG025319 // CCG005672 // CCG004918 // CCG005515 // CCG008853 // CCG005665 // CCG009479 // CCG017606 // CCG012574 // CCG006273 // CCG001241 // CCG017564 // CCG021733 // CCG012682 // CCG001245 // CCG001246 // CCG003893 // CCG003755 // CCG003141 // CCG028356 // CCG028…
GO:0015171	F	amino acid transmembrane transporter activity	40	4834	131	23397	0.0051	0.18	// CCG026815 // CCG024142 // CCG019849 // CCG002128 // CCG019046 // CCG009522 // CCG014464 // CCG007651 // CCG016567 // CCG004242 // CCG021654 // CCG009234 // CCG003069 // CCG006634 // CCG012792 // CCG009235 // CCG024421 // CCG009070 // CCG001194 // CCG010139 // CCG009593 // CCG026602 // CCG019072 // CCG015017 // CCG020694 // CCG010277 // CCG009519 // CCG008713 // CCG014202 // CCG024170 // CCG027…
GO:0015144	F	carbohydrate transmembrane transporter activity	31	4834	96	23397	0.0052	0.18	// CCG013400 // CCG011490 // CCG002191 // CCG025423 // CCG025421 // CCG001178 // CCG011749 // CCG012415 // CCG028376 // CCG001381 // CCG001382 // CCG001383 // CCG023648 // CCG023647 // CCG011903 // CCG020233 // CCG014555 // CCG017035 // CCG017034 // CCG017036 // CCG017031 // CCG009399 // CCG029479 // CCG010817 // CCG024623 // CCG000019 // CCG027542 // CCG011750 // CCG029152 // CCG025296 // CCG025…
GO:1901476	F	carbohydrate transporter activity	31	4834	96	23397	0.0052	0.18	// CCG013400 // CCG011490 // CCG002191 // CCG025423 // CCG025421 // CCG001178 // CCG011749 // CCG012415 // CCG028376 // CCG001381 // CCG001382 // CCG001383 // CCG023648 // CCG023647 // CCG011903 // CCG020233 // CCG014555 // CCG017035 // CCG017034 // CCG017036 // CCG017031 // CCG009399 // CCG029479 // CCG010817 // CCG024623 // CCG000019 // CCG027542 // CCG011750 // CCG029152 // CCG025296 // CCG025…
GO:0016762	F	xyloglucan:xyloglucosyl transferase activity	14	4834	34	23397	0.0053	0.18	// CCG026804 // CCG029138 // CCG012993 // CCG016792 // CCG002707 // CCG027829 // CCG021847 // CCG014649 // CCG004058 // CCG017884 // CCG017554 // CCG017552 // CCG016441 // CCG017963
GO:0003997	F	acyl-CoA oxidase activity	8	4834	15	23397	0.0053	0.18	// CCG013505 // CCG001426 // CCG001423 // CCG018236 // CCG013506 // CCG000169 // CCG013267 // CCG004918
GO:0016829	F	lyase activity	139	4834	549	23397	0.0053	0.18	// CCG009757 // CCG013815 // CCG018068 // CCG023635 // CCG008622 // CCG023731 // CCG002866 // CCG006660 // CCG002421 // CCG004301 // CCG018836 // CCG018837 // CCG011476 // CCG025722 // CCG009037 // CCG000837 // CCG012821 // CCG027367 // CCG002864 // CCG002865 // CCG006659 // CCG002867 // CCG006343 // CCG004441 // CCG027233 // CCG027234 // CCG008943 // CCG026372 // CCG001963 // CCG020205 // CCG020…
GO:0050590	F	desacetoxyvindoline 4-hydroxylase activity	5	4834	7	23397	0.0054	0.18	// CCG016902 // CCG006769 // CCG016901 // CCG018552 // CCG018551
GO:0016210	F	naringenin-chalcone synthase activity	5	4834	7	23397	0.0054	0.18	// CCG023407 // CCG023409 // CCG023408 // CCG018016 // CCG018015
GO:0046577	F	long-chain-alcohol oxidase activity	5	4834	7	23397	0.0054	0.18	// CCG003755 // CCG012962 // CCG003683 // CCG003754 // CCG003419
GO:0005215	F	transporter activity	393	4834	1685	23397	0.0055	0.18	// CCG024993 // CCG000650 // CCG012311 // CCG005413 // CCG028052 // CCG005228 // CCG005227 // CCG005220 // CCG024421 // CCG009427 // CCG020044 // CCG013292 // CCG014613 // CCG000404 // CCG022165 // CCG016667 // CCG029479 // CCG026235 // CCG022361 // CCG022009 // CCG001336 // CCG003662 // CCG029253 // CCG029254 // CCG025747 // CCG014259 // CCG005128 // CCG009733 // CCG008885 // CCG014464 // CCG005…
GO:0015103	F	inorganic anion transmembrane transporter activity	33	4834	105	23397	0.0064	0.21	// CCG010029 // CCG004934 // CCG006394 // CCG004933 // CCG005128 // CCG023733 // CCG002928 // CCG002925 // CCG006524 // CCG024008 // CCG002665 // CCG004245 // CCG005047 // CCG005046 // CCG029206 // CCG010030 // CCG003249 // CCG019070 // CCG020044 // CCG013292 // CCG004366 // CCG006206 // CCG027939 // CCG029728 // CCG006402 // CCG022361 // CCG002431 // CCG005539 // CCG002002 // CCG013369 // CCG022…
GO:0061134	F	peptidase regulator activity	12	4834	28	23397	0.0066	0.21	// CCG027450 // CCG027451 // CCG027448 // CCG015406 // CCG019497 // CCG000008 // CCG000009 // CCG012795 // CCG017461 // CCG027447 // CCG018798 // CCG000006
GO:0005402	F	cation:sugar symporter activity	23	4834	67	23397	0.0066	0.21	// CCG011490 // CCG025423 // CCG025421 // CCG001178 // CCG011749 // CCG012415 // CCG028376 // CCG023648 // CCG023647 // CCG011903 // CCG014555 // CCG017035 // CCG017034 // CCG017036 // CCG017031 // CCG009399 // CCG010817 // CCG024623 // CCG000019 // CCG027542 // CCG011750 // CCG025296 // CCG025297
GO:0005351	F	sugar:proton symporter activity	23	4834	67	23397	0.0066	0.21	// CCG011490 // CCG025423 // CCG025421 // CCG001178 // CCG011749 // CCG012415 // CCG028376 // CCG023648 // CCG023647 // CCG011903 // CCG014555 // CCG017035 // CCG017034 // CCG017036 // CCG017031 // CCG009399 // CCG010817 // CCG024623 // CCG000019 // CCG027542 // CCG011750 // CCG025296 // CCG025297
GO:0016772	F	transferase activity, transferring phosphorus-containing groups	572	4834	2508	23397	0.0068	0.21	// CCG010162 // CCG021211 // CCG010249 // CCG020347 // CCG023938 // CCG020226 // CCG017622 // CCG007060 // CCG029504 // CCG003320 // CCG022798 // CCG010888 // CCG007492 // CCG007493 // CCG022793 // CCG007496 // CCG007495 // CCG003101 // CCG008811 // CCG003265 // CCG005637 // CCG014610 // CCG015748 // CCG015740 // CCG029372 // CCG012982 // CCG012983 // CCG004892 // CCG027906 // CCG017981 // CCG018…
GO:0052747	F	sinapyl alcohol dehydrogenase activity	11	4834	25	23397	0.0072	0.23	// CCG020278 // CCG001266 // CCG015001 // CCG013303 // CCG000081 // CCG001243 // CCG002514 // CCG013304 // CCG015531 // CCG002923 // CCG002922
[truncated: 96 more rows]

## Sheet: Table S4-4
Table S4-4. Hour 24 gene ontology of the differentially expressed genes (DEGs)
[truncated: 359 more rows]

## Sheet: Table S4-5
Table S4-5. Hour 168 gene ontology of the differentially expressed genes (DEGs)
[truncated: 401 more rows]
