# Supplementary material for: Transcriptome and structure analysis in root of Casuarina equisetifolia under NaCl treatment
Source: PeerJ. 2021 Sep 22;9:e12133. doi: 10.7717/peerj.12133 (PMC8464194; doi:10.7717/peerj.12133)
Supplement: Supplemental Information 7 [file peerj-09-12133-s007.xlsx]

## Sheet: Sheet1
Table S4. The TPM of the total differentially expressed genes (DEGs)
ID	CK	Hour1	Hour6	Hour24	Hour168
CCG000005	0.614763	0.419746	33.5942	7.59484	1.8067
CCG000006	79.59	58.659	389.796	142.686	276.138
CCG000008	32.8724	31.2299	59.1043	24.0091	5.64287
CCG000009	65.0913	106.504	386.547	392.703	222.003
CCG000012	54.5847	59.2628	25.9364	12.3843	17.4376
CCG000015	48.6359	120.936	44.8092	41.1551	25.6976
CCG000019	0.0504957	0.593094	0.498986	0.105954	0.198068
CCG000031	13.6888	32.0148	33.502	30.6684	28.5715
CCG000035	0.190242	0.0738069	0	0	0
CCG000038	70.0422	107.088	18.7854	13.4687	13.9848
CCG000039	194.876	184.768	74.3852	28.7853	149.555
CCG000042	46.5051	46.6237	61.7768	91.2559	60.6418
CCG000043	0.0687025	5.41427	0.390633	0.117524	0.5571
CCG000050	187.302	155.561	331.918	124.835	76.7429
CCG000051	13.5641	16.1048	11.8116	3.78345	15.1016
CCG000059	0.329225	0.231764	0.0745763	0.0269051	0.147556
CCG000062	9.04838	8.90447	7.05948	4.96192	17.964
CCG000065	0.26114	1.60743	3.12693	3.91912	4.50714
CCG000067	922.417	896.279	549.49	358.806	637.187
CCG000071	0.237891	3.02232	0.41251	0.452773	1.2318
CCG000081	0.382397	0.17629	1.80417	0.913503	0.580507
CCG000082	5.5258	13.7601	15.4494	18.5878	19.2877
CCG000083	1.64556	7.19673	6.39983	4.44041	7.46707
CCG000084	1.24468	1.17835	6.38047	11.5581	2.33551
CCG000085	0.770558	0.509519	0.137977	0.0401866	0.194411
CCG000086	0.656441	0.651239	4.81852	7.40613	1.25484
CCG000087	46.4427	12.6911	18.7711	6.89349	10.5028
CCG000088	65.6185	21.1491	2.00235	1.11524	2.91839
CCG000090	4.32696	2.15865	0.933062	1.68212	3.25426
CCG000094	4.41364	1.72657	0.141759	0.162746	0.219624
CCG000096	70.9132	26.5138	5.38572	3.89884	6.3817
CCG000097	4.44159	2.96847	65.1212	84.7469	84.7921
CCG000099	12.5173	77.9402	38.5559	18.0113	25.3814
CCG000101	31.2942	80.0305	155.096	232.581	228.853
CCG000102	38.4473	47.6974	57.05	60.8138	49.2285
CCG000107	0.19304	0.28856	7.35615	30.392	64.0179
CCG000108	0.041872	0	0.581463	6.68175	11.0524
CCG000111	0	0.13517	0.195162	1.64217	3.72119
CCG000112	33.6073	39.2924	14.3279	6.76315	12.2741
CCG000113	0	0.103622	0.362372	1.84689	6.86012
CCG000117	0	0.0253404	0.371355	0.963307	7.70193
CCG000118	0.243054	0.278986	3.7405	9.71858	62.376
CCG000123	5.87285	2.36032	1.24373	2.58935	2.11185
CCG000124	5.77028	1.46647	3.54007	15.7623	2.60984
CCG000125	8.82687	1.91994	0.167219	0.560309	0.311557
CCG000129	0.0198897	0.0307933	0.190544	0.618342	0.0339911
CCG000130	45.2089	93.4322	65.7613	77.1551	111.077
CCG000137	0.411357	1.44524	0.319658	0.481132	1.94623
CCG000138	1.04357	1.51798	1.50615	2.16575	2.49863
CCG000145	9.35919	8.13037	5.50283	3.43019	12.5397
CCG000147	0.017109	0.210006	0.0144006	0.103816	0.485301
CCG000151	9.20592	8.08411	14.8065	16.6165	10.6314
CCG000153	853.74	472.366	286.153	114.032	26.7695
CCG000154	66.1357	62.4982	135.308	128.489	94.5402
CCG000156	1.80926	0.720727	0.27137	0.115027	0.261
CCG000159	1.24103	0.613708	0.149956	0.123766	0.050698
CCG000164	0.0121587	0.0299116	0.316186	0.651845	0.446698
CCG000165	0.0144121	0.0556082	0.356246	1.74999	0.894598
CCG000167	0.529361	1.25444	1.85338	1.10012	1.89534
CCG000169	89.2021	90.7643	337.905	540.977	294.849
CCG000170	55.9097	68.8054	140.553	180.895	328.215
CCG000171	52.3507	49.6575	33.7945	17.6748	50.5017
CCG000172	44.9421	39.3883	13.1388	4.93148	6.73669
CCG000174	2.13162	4.39063	1.57612	0.932299	2.1037
CCG000176	45.7483	37.4987	38.0931	16.0411	10.4881
CCG000177	2.03884	1.78665	5.7584	3.94429	3.22628
CCG000183	0.185983	0.265716	0.00486797	0.00451178	0
CCG000188	47.5385	46.6143	25.0711	17.5344	31.0709
CCG000190	1.39161	0.67505	0.323239	0.582479	0.560662
CCG000192	2.69632	1.87027	1.52263	0.698386	2.05329
CCG000193	5.28016	3.33488	1.56844	1.6494	3.18454
CCG000195	10.6022	10.1069	39.7313	34.5225	40.5154
CCG000198	19.0754	20.842	10.5807	5.34087	12.7268
CCG000199	1.34718	4.52858	3.3238	3.14275	1.41825
CCG000203	280.324	232.809	292.483	504.187	289.857
CCG000204	596.133	468.98	543.107	1006.62	342.063
CCG000205	218.12	207.815	125.872	55.7152	110.685
CCG000207	0	0.0717576	0.021947	0.0274114	0.290421
CCG000209	1.5379	0.760996	0.237038	0.170216	0.420006
CCG000211	5.6149	4.84466	10.8056	10.6245	8.1163
CCG000214	245.071	92.353	294.088	450.393	333.301
CCG000215	0	0.299354	0.429636	0.268423	0.445485
CCG000216	13.8964	16.1598	23.159	34.3682	17.5671
CCG000218	75.5311	34.849	22.6636	34.4231	52.9538
CCG000219	126.314	109.622	59.238	19.4781	20.0506
CCG000221	21.0807	17.8087	7.13879	4.54482	14.4668
CCG000222	32.6412	16.1993	1.68895	0.367982	0.643647
CCG000223	13.5551	22.294	12.246	8.62698	25.548
CCG000224	26.4164	16.5031	8.37791	15.2485	18.9394
CCG000225	2.55855	2.96286	1.88454	0.263152	1.31998
CCG000226	70.1532	61.7956	46.3403	27.2739	19.0292
CCG000229	0	0	2.04141	0.176268	0.015236
CCG000230	0.0328375	0.0116843	1.70927	0.709201	0.425623
CCG000232	0.863275	8.60181	21.0362	14.6682	53.4388
CCG000233	6.91347	14.8284	74.2782	56.0274	119.716
CCG000234	1.99691	2.95651	27.6374	6.5353	50.4188
CCG000235	109.06	102.113	54.1184	8.71531	12.7398
CCG000241	138.25	53.2503	13.2879	4.42545	10.2604
CCG000242	19.2777	9.48632	4.33875	5.46389	8.99327
CCG000243	6.58805	4.92309	2.38262	3.75049	3.13139
CCG000245	30.7135	34.6373	39.5195	50.3006	42.6506
CCG000246	3.01577	1.85972	1.8794	0.408366	0.924989
CCG000247	0	0	0.550525	0.477835	0.0371924
CCG000248	0.719846	26.557	3.87414	6.57537	3.73844
CCG000249	2.88681	2.51952	1.60723	0.996539	1.01934
CCG000258	0.0385307	1.95678	0.479719	0.0764226	0.0903195
CCG000261	1.39137	1.86428	0.419098	0.530007	0.867291
CCG000267	51.0115	38.4749	10.692	8.171	21.7419
CCG000276	1.89129	3.87397	11.9122	8.69622	9.71395
CCG000279	102.578	118.443	149.441	247.848	116.73
CCG000281	49.6725	100.351	62.5724	80.4233	41.6149
CCG000282	33.6381	164.396	105.939	106.795	139.97
CCG000285	11.9286	12.4119	18.279	12.5373	4.6322
CCG000289	6.4474	7.8494	72.9006	73.7666	118.045
CCG000292	0.196459	0.208328	0.352456	0.372605	1.23052
CCG000293	6.36156	2.32119	3.11881	4.50509	4.87233
CCG000294	7.56038	5.52727	3.19909	0.691092	2.01163
CCG000296	22.5011	15.5136	14.0027	11.8048	6.16016
CCG000299	15.8123	15.9313	8.70542	5.58588	10.0413
CCG000306	9.04738	13.7964	4.7118	1.40135	3.60138
CCG000312	12.0965	10.1852	32.2789	23.7424	10.3914
CCG000313	0.157333	1.31016	29.168	25.303	52.3051
CCG000320	52.4812	68.8353	113.932	98.869	93.6062
CCG000322	0.0106894	0.55729	0.170908	0.219426	0.329945
CCG000323	5.64518	5.51698	2.43246	0.652973	1.84227
CCG000329	7.01955	4.60283	4.18296	3.24124	2.21621
CCG000331	3.25178	2.00034	5.58643	7.42758	1.47511
CCG000333	114.543	166.361	319.905	283.984	235.549
CCG000334	115.314	385.564	437.802	316.523	720.506
CCG000335	14.4469	14.9436	17.8061	15.6867	29.4288
CCG000337	9.91805	36.8281	149.35	125.443	319.878
CCG000338	2.58564	2.84779	9.9901	22.021	15.3588
CCG000339	723.606	500.189	1433.19	2965.57	1106.37
CCG000340	15.4145	6.87976	5.57735	3.73955	3.94869
CCG000342	243.774	395.564	430.371	396.903	329.744
CCG000345	6.36362	5.50539	1.20513	2.01197	2.8654
CCG000346	12.9201	10.5805	8.75489	2.14276	1.43351
CCG000351	49.7145	25.7727	7.77099	1.32325	1.02474
CCG000352	124.836	86.2606	30.5243	22.4797	29.112
CCG000355	7.7906	3.41662	0.508278	0.386264	1.58071
CCG000365	48.3581	19.4659	86.7301	72.2149	53.4864
CCG000368	7.7387	21.242	15.8367	15.1304	14.6291
CCG000369	83.0401	76.3001	92.0798	166.841	126.599
CCG000370	24.962	22.7074	34.138	40.3114	21.3792
CCG000373	211.615	166.89	112.55	79.4499	133.792
CCG000374	53.1827	11.9624	2.95073	3.4759	2.09899
CCG000375	89.2703	31.2576	1.96259	8.22212	11.9351
CCG000376	10.2107	7.73147	2.40883	1.81256	2.6663
CCG000377	8.45832	6.63901	4.33792	2.26745	4.20527
CCG000378	36.4963	27.2492	18.4856	15.3452	12.2246
CCG000380	25.9658	31.6463	44.4976	31.5796	51.1351
CCG000381	19.2434	21.6161	58.3986	51.1327	32.9229
CCG000382	4.56659	13.4702	5.66009	1.96577	4.68741
CCG000383	0.712824	0.852732	9.75775	13.1564	47.5304
CCG000384	0.0754181	0.0879221	2.6022	1.46982	2.69082
CCG000385	1.7429	18.0839	23.917	32.1418	55.0408
CCG000386	0.0984606	0.207861	0.836212	1.33283	1.3503
CCG000389	4.77299	3.29738	1.20154	1.92123	3.5526
CCG000390	97.1511	176.6	238.949	189.469	98.1053
CCG000391	39.9678	77.1172	224.236	330.584	124.553
CCG000392	631.898	1032.14	1285.22	1272.02	655.25
CCG000393	43.1629	32.9126	21.3543	76.3817	58.423
CCG000394	261.675	222.741	799.279	2144.7	2585.76
CCG000396	297.946	108.986	21.8912	8.96256	2.83542
CCG000397	181.779	60.2231	19.9488	18.6669	5.41438
CCG000398	831.285	342.303	65.3309	13.1784	4.73324
CCG000399	1151.31	935.449	1434.2	2013.36	440.206
CCG000400	415.458	345.795	92.2739	66.1775	57.2176
CCG000401	3885.48	3208.05	676.156	62.6557	39.9435
CCG000402	9482.82	8294.48	1639.71	55.4443	12.2896
CCG000403	9503.52	8629.71	2272.83	86.114	15.7587
CCG000404	209.147	134.693	48.6649	44.7954	62.932
CCG000405	0	2.18213	0.271269	0.148884	0
CCG000406	48.4485	43.5202	20.2959	9.25107	10.7173
CCG000409	156.531	40.8587	185.488	483.503	29.5698
CCG000410	29.6264	14.2643	15.0057	29.3404	18.7444
CCG000418	5.3653	2.1396	2.28789	1.89416	4.3582
CCG000420	12.9791	8.60626	5.02611	2.66933	4.9167
CCG000423	0	0.0391916	0.102695	0.218191	0.0725604
CCG000424	0.830388	0.490447	0.913372	1.63197	1.53127
CCG000425	3.93374	3.03722	2.00795	1.04495	1.41408
CCG000426	90.4255	91.6766	59.5159	30.709	34.0076
CCG000427	62.9839	62.7901	44.3825	21.2442	44.7129
CCG000429	28.3716	24.333	5.57579	2.69541	12.6994
CCG000431	183.835	169.094	35.0829	7.23704	15.2687
CCG000443	393.878	242.406	110.426	203.992	44.9237
CCG000449	1.33743	14.8096	1.47642	0.710866	0.545343
CCG000451	0.165139	0.155529	0.378153	1.14673	1.00826
CCG000452	104.39	99.8233	60.3184	39.997	159.388
CCG000454	5.11571	5.9178	2.96268	0.208604	1.02978
CCG000456	30.2694	23.3545	9.62174	1.71138	4.19698
CCG000457	33.6908	28.5065	19.8536	11.2282	23.2665
CCG000458	11.7462	10.0455	5.16558	3.23145	7.58319
CCG000460	34.0966	80.5095	95.0012	80.2893	116.579
CCG000461	0.854411	0.809852	1.63222	2.30831	2.72542
CCG000462	102.881	91.7721	53.5582	39.8179	127.989
CCG000467	0.969638	0.523601	2.59393	5.99724	3.09816
CCG000470	222.833	454.021	285.376	188.619	368.48
CCG000471	35.1943	30.3006	15.941	12.7126	20.0721
CCG000474	7.78338	5.71083	1.77296	0.160366	0.026163
CCG000475	3.04908	3.0691	0.696363	0.0438984	0.00934188
CCG000476	4.81019	4.91003	14.4494	22.8312	7.29173
CCG000478	33.4236	32.5884	56.0944	58.3927	35.4207
CCG000484	1.70861	2.23782	1.03844	0.197007	2.13794
CCG000485	3.8597	3.8129	1.4003	0.513986	3.51511
CCG000487	76.8523	162.408	76.4928	47.2568	85.8392
CCG000490	16.9635	13.2843	8.14088	5.45019	8.96602
CCG000507	1.58054	0.345292	0.0534804	0	1.8529
CCG000508	1.07378	0.430112	0.0388292	0	0.395083
CCG000510	46.858	49.3493	164.092	145.055	141.043
CCG000511	16.6837	20.2758	31.6439	29.9265	30.4682
CCG000513	19.7328	12.2729	9.03316	12.2042	8.66504
CCG000515	3.32336	3.18394	0.593955	0.0891805	0.358123
CCG000516	6.80534	2.06507	0.675663	0.0922089	0.882029
CCG000517	7.38336	4.18509	1.60651	2.37848	0.191197
CCG000518	55.6339	30.9622	17.0331	22.1939	8.0588
CCG000524	21.762	24.1572	46.3945	40.0347	68.6898
CCG000526	416.181	192.915	246.892	335.025	347.5
CCG000528	15.2798	14.5026	3.57239	3.22041	6.01522
CCG000529	23.9636	69.0138	37.5319	21.4162	27.158
CCG000531	99.7677	126.051	138.028	157.445	138.175
CCG000532	0.179209	3.02791	3.33129	2.58534	5.52619
CCG000533	3.58201	67.884	71.5869	51.2351	136.312
CCG000537	0.0895591	0.195902	0.717063	0.177361	0.00930925
CCG000544	9.17026	18.1336	8.50606	0.73746	1.21312
CCG000547	81.751	102.703	249.156	196.893	357.599
CCG000549	11.2358	10.8333	5.59638	2.17259	5.05913
CCG000550	18.9683	17.2844	7.70001	3.5991	6.61699
CCG000551	1.47356	0.33889	0.256034	0.0867185	0.0225025
CCG000577	0.360305	1.58465	0.0575854	0.0288875	0.0388293
CCG000591	9.62597	6.41684	3.41381	5.00606	4.03582
CCG000594	0.0325337	2.26712	0.282337	0.0943621	0.256568
CCG000597	1.19731	0.513011	0.393881	0.492041	0.248298
CCG000608	7.25662	2.33684	3.57087	2.07432	2.372
CCG000613	2.16698	1.49543	1.68568	2.04573	0.996011
CCG000615	4.87116	2.84844	1.26818	2.21596	2.81092
CCG000638	22.4085	1.29826	2.52759	3.1966	2.13336
CCG000639	11.8482	2.09419	0.432762	0.886525	0.835953
CCG000643	20.6996	27.0764	26.886	26.0949	40.1579
CCG000647	0.0694719	0.0263074	0.0484585	0.454291	0.530309
CCG000650	10.173	5.95931	39.0181	50.3798	9.21995
CCG000652	3522.27	3271.72	3839.92	2417.65	1099.63
CCG000653	2.12011	5.47317	5.35852	3.67908	1.585
CCG000654	23.9234	14.2084	40.8136	14.0979	3.81066
CCG000659	0.0104835	0.0120132	0.0823643	0.1213	0.205133
CCG000662	18.2043	119.952	40.3514	42.7989	76.3167
CCG000663	0.632078	5.91245	0.302091	0.674512	1.77416
CCG000664	3.65248	78.8801	26.8138	8.78523	21.0504
CCG000665	20.6153	73.6274	67.2935	23.2907	75.8117
CCG000670	6.39908	4.95053	3.38599	1.61807	7.12382
CCG000671	0.312229	1.02371	52.3885	15.0768	3.1767
CCG000672	0	1.09845	14.3501	3.25233	1.52517
CCG000675	5.72001	5.80621	2.90155	0.0528859	0
CCG000679	0.818208	3.75821	3.61086	1.60796	2.6525
CCG000683	30.6863	18.779	4.02841	5.46152	3.22581
CCG000684	1.3607	2.32594	6.09381	3.33954	4.35567
CCG000685	54.5908	103.389	81.3293	74.508	110.445
CCG000690	14.726	11.3162	25.2152	34.3594	10.5603
CCG000693	3.718	4.92583	1.09457	0.928016	1.84465
CCG000717	209.254	278.024	372.027	376.325	298.819
CCG000718	271.774	273.61	144.949	85.0861	102.187
CCG000719	6.42024	5.14696	1.98451	0.906989	2.96679
CCG000720	26.1462	21.9198	13.0836	6.8494	18.6472
CCG000721	270.873	129.408	684.436	823.684	368.973
CCG000723	0.101454	0.460636	0.715557	0.690159	1.1731
CCG000724	6.27005	6.17732	4.43081	2.31438	6.57242
CCG000726	87.8781	88.457	142.284	70.2126	19.1567
CCG000728	118.272	412.263	127.277	110.29	150.373
CCG000732	70.2636	29.4489	40.2466	51.5532	29.6262
CCG000733	4.31912	3.44962	3.76234	1.54353	2.72203
CCG000734	13.7287	11.7447	8.60313	5.01989	10.5683
CCG000737	20.0103	15.5437	7.92977	6.32656	20.5672
CCG000742	6.91792	6.40609	2.82644	2.15824	10.1242
CCG000744	2.98471	3.66853	3.13883	4.98884	5.24054
CCG000746	155.518	406.411	1273.6	1186.02	1453.91
CCG000755	9.60199	8.30143	1.5942	0.413357	0.775525
CCG000756	15.7791	9.41529	1.83913	0.742437	0.787265
CCG000757	15.1922	16.2119	9.19797	2.22854	6.7454
CCG000762	119.314	107.613	61.0852	41.3019	91.9382
CCG000764	18.5261	18.4984	12.4615	3.43362	1.4486
CCG000768	0.173637	1.50625	0.0735322	0.123358	0.544943
CCG000770	31.8071	23.6163	7.1274	17.7569	10.5762
CCG000774	5.46679	3.40677	1.21211	0.302551	2.09228
CCG000780	45.6732	15.1033	7.7867	6.31369	14.1249
CCG000782	7.38648	4.9356	3.91877	2.38795	3.05176
CCG000808	721.332	763.982	493.387	264.123	289.581
CCG000810	2.2242	2.46137	2.3236	1.15208	0.513501
CCG000814	0.360285	1.42047	6.01853	7.09085	27.8523
CCG000815	39.9473	41.4103	14.2293	17.2723	13.7684
CCG000816	9.57866	13.2851	17.183	17.2264	14.4574
CCG000817	0.0176719	0.19092	0.0612722	0.190359	0.262839
CCG000818	26.6241	17.3033	2.81741	0.662134	3.55777
CCG000819	309.373	396.934	125.647	76.5938	101.987
CCG000821	24.3299	19.4588	5.10933	0.397252	2.16196
CCG000822	16.9276	21.1027	34.8211	70.9613	103.679
CCG000828	18.5128	8.44335	2.52651	1.32866	1.19497
CCG000829	20.0961	22.2184	36.9033	39.4542	34.054
CCG000830	12.0961	15.704	6.61888	4.69718	6.06081
CCG000837	67.601	150.515	136.906	70.1342	175.202
CCG000838	0.197729	32.2325	0.424414	0.206492	0.348108
CCG000842	9.04601	18.7398	116.948	85.2535	29.8744
CCG000846	5.44446	4.01205	15.2769	15.2503	23.7815
CCG000847	28.3104	28.1957	117.037	175.809	76.1797
CCG000849	18.5553	14.0877	17.2898	35.627	21.9794
CCG000850	0.0925049	0.17046	9.46769	6.98221	7.27634
CCG000857	0.830991	0.527172	0.155949	0.0191049	0
CCG000869	51.2333	43.1784	11.4823	4.43635	8.39866
CCG000872	1.01259	1.75286	20.263	35.1809	5.68273
CCG000873	4.12795	2.55445	0.996447	0.170348	0.045243
CCG000874	13.7133	13.1995	16.8991	22.5443	47.3782
CCG000880	0.677779	0.833719	0.109449	0	0.0870832
CCG000886	287.37	411.32	1256.72	1295.83	994.989
CCG000890	64.3081	44.8059	7.78929	3.30056	1.83023
CCG000891	6.27927	9.94925	4.40603	2.68683	2.6487
CCG000895	2.75817	2.7234	4.75493	3.91835	6.1895
CCG000896	11.8037	12.5685	30.8039	18.1204	22.8829
CCG000898	0	0.381778	0.0760834	0.0088047	0.131161
CCG000899	1.75803	2.92181	2.34786	0.798666	3.93483
CCG000903	2.516	1.39583	0.674545	1.69222	1.82364
CCG000904	4.92067	3.14359	1.0514	0.870066	2.63561
CCG000905	15.1116	11.6398	3.94627	1.81145	1.41362
CCG000906	1.5866	1.34874	0.390731	0.276707	0.837262
CCG000910	9.12664	4.58167	4.28844	6.18605	4.00673
CCG000912	787.043	910.368	1251.21	1439.02	1028.89
CCG000913	45.6798	79.9683	19.9226	1.34039	2.82103
CCG000917	43.5555	50.0048	75.9426	77.0521	50.9955
CCG000918	38.7011	56.4828	125.824	99.8455	76.6447
CCG000919	5.73359	12.1983	41.0212	51.1976	78.4628
CCG000921	15.7766	12.5118	7.66346	5.99467	18.5961
CCG000922	543.569	631.827	1350.51	687.084	864.581
CCG000926	0	0	4.79312	1.35711	1.32855
CCG000927	34.711	35.769	44.6796	60.3259	31.2663
CCG000928	8.28588	7.0182	16.6419	14.4379	9.98231
CCG000932	142.32	145.367	126.649	188.774	368.157
CCG000934	25.4304	14.5508	3.70516	2.44125	6.05877
CCG000935	1.04719	0.578468	0.0856979	0.104072	0.642482
CCG000936	17.8727	15.499	9.32129	6.79923	11.2047
CCG000942	2.56892	22.5159	3.8747	2.28373	3.73869
CCG000943	2.4091	2.88156	8.92514	6.11275	2.31863
CCG000944	15.306	10.4866	14.0254	10.7879	5.18591
CCG000945	6.71792	6.59387	5.79715	2.54994	4.36339
CCG000957	22.464	22.8125	13.0604	1.71902	7.13882
CCG000960	19.8713	29.4238	13.8201	1.38061	0.630699
CCG000961	1.19008	0.31723	0	0	0
CCG000962	2.81532	2.04529	8.82521	9.2023	35.2269
CCG000965	54.1489	53.067	32.1667	14.4865	34.2301
CCG000966	51.1909	44.3277	61.9058	81.3137	72.0001
CCG000974	54.2583	51.7305	28.6052	12.2321	4.64329
CCG000983	317.791	102.316	645.508	549.488	155.796
CCG000985	1.33095	0.474321	1.08002	2.74411	3.86313
CCG000991	17.1957	18.0516	10.5865	4.92606	7.9677
CCG000994	41.0195	54.6308	71.9531	35.2031	33.3189
CCG000995	6.86598	3.61748	2.6202	8.09316	1.66452
CCG000996	19.3041	13.7842	4.07017	1.40232	4.35066
CCG001002	17.1817	10.876	46.0745	117.311	72.8628
CCG001003	22.3922	16.0558	103.894	178.007	110.93
CCG001004	51.0636	40.4259	250.235	429.916	382.027
CCG001005	35.154	30.3516	8.68893	4.26567	3.97725
CCG001006	31.3223	94.5078	49.4694	19.9707	38.4689
CCG001007	49.5805	137.132	77.5693	29.7839	68.3452
CCG001009	1.4967	1.45611	0.774379	0.410932	0.913036
CCG001014	0.946923	1.0357	0.391864	0.374388	0.271066
CCG001015	2.47728	1.89445	0.984247	0.790376	0.535876
CCG001018	2.99378	2.89585	1.09767	0.517369	0.759628
CCG001023	0.0156557	0.798268	1.2595	0.664319	2.22436
CCG001027	25.9299	14.1902	7.05014	15.3989	3.23746
CCG001031	0.0644926	1.0965	0.295312	0.629624	0.672435
CCG001044	4.17192	2.80749	0.551731	0.615187	1.49183
CCG001045	6.20916	6.57086	13.4568	17.5029	13.0127
CCG001049	0.422006	0.199399	0.353128	1.9579	0.260069
CCG001051	2.04052	4.54877	0.482681	0.0881745	0.0353299
CCG001052	129.561	72.323	30.75	42.0457	31.2091
CCG001053	0.52901	0.465183	0.0515113	0	0.0124287
CCG001054	4.36099	6.57639	2.2019	0.193529	0.1232
CCG001055	24.3488	11.6715	1.88077	0.576964	1.21975
CCG001056	4.85812	2.89243	1.48016	2.38475	2.15133
CCG001063	9.12924	8.626	8.29387	8.28836	2.20378
CCG001071	190.182	241.827	315.365	308.465	221.424
CCG001072	36.3581	103.014	135.02	104.66	61.3884
CCG001073	4.7426	5.7714	11.1684	13.3631	5.33201
CCG001076	4.78091	6.58495	2.04379	2.43844	0.315706
CCG001077	5.49038	5.16905	1.61718	1.09088	2.28639
CCG001080	2.65898	0.781262	0.499193	0.0989153	0.096899
CCG001082	70.9917	62.466	26.9002	2.98314	3.24768
CCG001084	3.21117	7.97525	3.66034	3.05658	3.14542
CCG001085	58.8802	82.2943	123.79	101.24	27.7075
CCG001086	44.6722	26.5203	59.7719	75.9321	7.69665
CCG001087	19.4324	4.11584	0.334356	2.71561	0.278252
CCG001088	39.5056	10.287	2.43733	11.916	2.82303
CCG001089	1.90693	0.814464	0.0936556	0.540921	0.283727
CCG001090	109.931	56.6807	10.9818	42.4732	9.38987
CCG001091	22.822	8.4907	2.79725	19.3064	3.80857
CCG001092	39.7863	12.1669	4.02694	19.2518	0.886993
CCG001095	2.92266	5.26898	12.8846	7.07052	10.6974
CCG001105	3.44436	3.83643	1.21432	1.20743	3.09537
CCG001106	4.80286	5.22944	1.7274	1.61904	5.06692
CCG001107	4.08137	7.8063	5.50201	6.24668	15.8609
CCG001115	1.22088	1.84046	1.55534	0.563221	0.0747662
CCG001118	5.58819	14.8706	26.3176	30.4268	27.4879
CCG001120	5.59211	11.3111	3.29673	7.40422	6.18681
CCG001127	57.1457	88.0003	505.247	442.747	249.216
CCG001136	3.23311	4.04057	2.93407	2.3148	1.44094
CCG001137	0.954987	0.515223	0.537364	0.28741	0.334072
CCG001149	6.59411	5.01178	3.74573	5.07505	1.89055
CCG001154	3.32777	1.57506	0.978232	0.562864	1.56573
CCG001156	19.6125	92.5086	57.4162	52.8436	75.0277
CCG001157	14.3109	77.244	42.2121	39.6524	61.6736
CCG001158	25.7645	29.9129	34.512	40.8926	38.6272
CCG001159	32.1301	33.1421	77.5876	54.6383	25.992
CCG001160	0.0406687	0.846997	1.84518	0.982668	0.20347
CCG001165	27.0707	7.30894	4.34231	1.9166	5.49425
CCG001167	25.8555	32.8485	81.8122	71.3159	50.4675
CCG001171	12.1088	13.3563	24.448	21.6717	9.26096
CCG001174	18.4354	11.0102	6.0438	6.90596	30.0724
CCG001175	24.2311	20.6744	38.4599	46.536	41.3825
CCG001177	38.2222	32.4612	22.8943	14.4743	19.6694
CCG001178	83.131	69.2154	33.3565	22.9978	44.4709
CCG001180	3.61034	2.42521	1.63224	0.759387	7.58166
CCG001181	98.7512	143.414	229.664	194.532	164.768
CCG001182	1.6348	0.783221	0.36178	0	0.0916766
CCG001184	9.59904	9.11061	0.36375	0.154304	0.392948
CCG001190	11.3231	10.929	6.93711	1.76311	3.67376
CCG001194	0.0541936	0.177765	0.463618	0.163521	0.460395
CCG001196	58.0792	131.255	82.3437	2.66177	1.45889
CCG001197	19.1239	7.94504	7.11723	6.66116	3.07654
CCG001199	61.956	303.282	23.4567	6.93959	5.82091
CCG001204	13.8056	13.9196	20.1531	22.8692	16.5975
CCG001206	33.375	24.1076	4.21058	2.93034	10.4171
CCG001207	43.7631	41.3332	80.9525	94.6388	77.0633
CCG001208	29.9497	32.823	53.9871	63.7302	25.5216
CCG001209	17.5604	14.712	64.8639	65.3443	20.8571
CCG001216	21.8976	18.8157	27.468	37.37	27.9647
CCG001221	3.74658	2.89644	1.12772	0.188642	0.0720551
CCG001230	25.3324	19.7619	13.1407	9.13324	9.91983
CCG001232	10.4981	4.95219	8.20296	8.26069	4.37215
CCG001234	10.366	8.19391	3.45929	1.59397	6.24312
CCG001235	99.0038	88.0172	192.67	136.448	186.092
CCG001238	6.44113	6.61955	44.1568	36.7863	59.5382
CCG001239	4.73139	3.63617	1.63775	2.89451	2.63286
CCG001241	2.2605	4.22615	20.1002	6.06554	22.9034
CCG001242	3.12663	7.33137	35.2738	11.0895	37.3397
CCG001243	0.301762	0.5145	4.40203	1.89408	1.68893
CCG001245	6.39951	5.82477	59.0769	40.6256	10.0797
CCG001246	6.72015	5.74424	56.4204	40.8446	10.7056
CCG001248	3.90347	3.66674	4.64198	6.55166	6.65315
CCG001256	3.02321	1.72775	0.611312	0.147547	0.139859
CCG001258	90.8994	140.743	229.843	206.007	228.511
CCG001260	1570.24	1047.22	171.393	181.717	61.3006
CCG001266	0.580194	0.768163	6.34297	2.77162	1.07105
CCG001269	298.688	245.919	65.0321	23.3939	62.0868
CCG001274	8.38082	8.05855	3.32794	3.31195	7.12911
CCG001275	91.1917	85.1083	50.6669	31.9151	45.6764
CCG001276	0.516126	0.281103	1.06276	1.17786	2.48946
CCG001277	304.923	139.99	129.84	85.402	80.5066
CCG001278	3.97334	2.7055	14.3926	24.1424	16.6732
CCG001279	29.1278	27.347	23.0812	28.0924	12.8704
CCG001284	1336.64	976	2135.4	1738.25	308.619
CCG001285	1311.54	1157.3	1903.1	1480.09	201.633
CCG001286	2.33373	25.5066	11.3061	13.6137	25.4206
CCG001290	0.606322	0.639157	0.710996	1.6887	2.18411
CCG001293	3.79928	2.92353	1.71533	2.38626	7.62097
CCG001296	37.1834	25.1597	8.34301	2.21735	1.00632
CCG001304	31.0187	64.5326	230.956	238.132	268.849
CCG001305	57.1752	46.4615	13.6857	3.22151	6.26308
CCG001307	8.82345	18.847	4.25037	0.146307	0.0669716
CCG001309	5.01884	7.95503	6.76165	2.55624	1.0623
CCG001310	1.15268	1.40855	1.03332	0.0409531	0
CCG001313	12.3899	13.0888	6.48032	0.195352	0.0167544
CCG001320	2.13336	3.96585	4.93912	2.37947	3.6787
CCG001327	64.2462	14.6498	0.851415	1.9552	2.33719
CCG001328	0.765413	0.74701	0	0	0
CCG001329	0.212107	0.869141	0.347922	0.502689	1.48688
CCG001330	0.985379	4.11286	3.36321	9.06684	13.4308
CCG001333	8.40763	8.25031	5.89992	1.25642	1.93706
CCG001335	62.1806	81.741	72.8938	23.1971	109.004
CCG001336	14.6529	16.7856	44.1695	27.9707	25.0843
CCG001337	0.726301	1.71208	1.82326	1.21818	2.40289
CCG001340	0.0381689	2.39155	1.19789	0.010006	0.157062
CCG001344	1.08397	0.337158	0.155931	0.283158	0.530966
CCG001345	1.29168	3.60457	1.02471	0.502406	0.622874
CCG001347	0.0612791	0.0657957	0.959953	1.77114	1.77304
CCG001348	8.31784	6.93822	1.65246	0.97109	3.33134
CCG001349	47.8523	40.5835	18.0755	6.94622	25.8178
CCG001351	5.4069	4.54278	2.4681	0.642748	1.30838
CCG001355	2.2829	1.00841	0.504329	2.19523	2.01022
CCG001357	38.0128	38.3858	76.1131	48.9773	29.3925
CCG001359	1.48726	0.892113	0.580322	0.618417	0.828768
CCG001362	50.2676	73.9159	88.0998	98.1325	93.1877
CCG001363	4.72494	5.71764	8.17773	7.48293	6.48101
CCG001364	63.4441	77.6504	148.617	152.723	157.792
CCG001367	3.75708	3.60476	0.647354	0.109207	1.06954
CCG001371	8.35437	9.39576	12.7876	10.1737	16.5329
CCG001372	279.773	139.056	8.80323	0.899049	2.59605
CCG001376	2.39265	81.9323	24.4257	27.7147	98.0611
CCG001378	1.76307	1.83776	0.618398	0.164434	0.0288883
CCG001381	4.69225	2.60673	0.398312	2.51443	1.47126
CCG001382	11.5831	7.29203	1.38808	1.0102	1.7142
CCG001383	14.8649	10.7351	1.4976	0.954631	2.17711
CCG001389	34.8829	68.3385	24.889	16.0716	15.1282
CCG001391	0.41228	0.496391	0.454173	0.936977	0.203676
CCG001410	69.0296	87.3004	60.2724	14.5445	17.7979
CCG001411	46.0905	77.9528	49.501	37.0936	13.7931
CCG001416	17.8214	17.4846	3.86057	1.71905	3.00043
CCG001419	14.079	14.1622	32.4649	16.3553	5.75776
CCG001420	2.54507	1.39111	0.697399	0.810925	0.181686
CCG001421	114.301	155.524	268.977	527.543	198
CCG001422	0	0.180213	0.0674811	0.236177	0.184337
CCG001423	0.406209	1.1031	4.70544	3.60228	1.53973
CCG001426	1.19044	3.52718	32.4774	39.7679	17.6352
CCG001427	0	0.00984091	1.90082	0.23903	0.0236676
CCG001430	16.6265	13.8485	15.0398	26.5152	20.1029
CCG001431	7.36928	6.50775	2.4743	0.880091	0.605577
CCG001433	49.3533	21.9541	39.8639	58.7636	65.1068
CCG001436	4.82893	2.5028	2.93889	4.15793	1.80284
CCG001439	70.2433	106.261	128.318	110.366	184.206
CCG001440	0.407303	12.1062	2.91806	3.01423	2.84054
CCG001442	211.723	174.919	21.9494	41.785	59.3432
CCG001444	252.388	205.529	107.632	130.889	347.876
CCG001446	0.378053	0.402109	0.286214	0.271416	1.19466
CCG001450	9.9529	7.43934	18.9924	19.8792	27.0154
CCG001451	6.35321	11.3145	13.3595	11.7228	7.93445
CCG001458	0.320905	2.51802	6.61611	3.50817	1.83793
CCG001459	0.234433	0.254047	1.27141	1.19909	0.315375
CCG001465	42.5069	39.8736	25.5478	6.23048	13.5182
CCG001469	45.5023	60.9675	106.614	56.3832	76.976
CCG001482	83.6022	83.9296	126.857	163.975	162.085
CCG001484	6.13373	4.01466	2.23525	2.4402	3.18089
CCG001487	72.8801	55.8767	24.045	17.5961	23.9858
CCG001488	49.8785	27.2187	12.0509	6.47985	7.24555
CCG001491	33.0226	31.7305	23.8684	2.49559	0.274316
CCG001492	2.03726	2.35863	3.16561	0.371819	0.797814
CCG001493	18.7761	57.8168	26.6236	19.9353	34.5327
CCG001494	0.814507	1.48712	1.01409	0.331562	2.59567
CCG001500	41.233	38.433	23.2211	19.1017	8.61454
CCG001501	69.2622	61.6497	163.742	196.874	329.5
CCG001503	23.0484	11.1515	19.9891	19.8657	20.1068
CCG001505	3.2617	3.30622	0.539927	1.94453	1.85228
CCG001511	7.91198	6.55228	4.17628	2.61372	3.76973
CCG001512	13.5903	12.9199	6.89226	1.30558	0.517681
CCG001514	23.6017	24.7025	9.87303	3.61056	4.26568
CCG001516	147.994	152.299	85.438	32.5042	79.9257
CCG001517	1.67961	0.429534	0.101452	0.309251	0.852739
CCG001530	36.2026	22.6811	46.1949	69.9154	45.213
CCG001531	21.5266	18.8682	50.8417	46.148	35.3656
CCG001534	50.4002	16.8913	95.5725	100.857	26.1867
CCG001535	11.5624	5.84016	16.3063	22.152	26.7311
CCG001540	108.522	157.29	156.85	162.179	213.945
CCG001543	23.217	12.1044	3.42754	1.06914	3.11908
CCG001545	0.44213	16.544	6.03265	2.30681	2.94292
CCG001546	0.164551	4.67666	1.22042	0.92656	2.14272
CCG001547	38.2902	44.1923	43.3472	42.5228	85.2091
CCG001549	29.5988	25.1705	14.5794	3.72448	4.16734
CCG001552	24.2364	23.095	17.0278	5.63864	0.548797
CCG001554	0.530096	0.764196	1.52173	2.38506	1.52605
CCG001555	21.7063	18.8745	45.0229	54.574	34.0437
CCG001556	0.607164	0.457394	1.41448	1.93011	1.13901
CCG001564	0.270909	1.27456	0.350244	0.0988001	0.120827
CCG001565	11.8832	17.6579	5.47042	3.39556	5.93815
CCG001566	4.07734	13.5418	5.86452	3.15271	2.82917
CCG001567	0.546478	1.92651	0.691845	0.560307	0.296286
CCG001568	0	0.798244	0.105855	0	0.127776
CCG001570	202.694	600.116	844.021	276.441	365.455
CCG001571	0	1.12033	0.465685	0.95855	0.533912
CCG001574	904.857	949.128	1417.98	1671.97	1122.76
CCG001575	6.48285	3.45543	1.51891	2.34445	4.16229
CCG001580	126.106	93.0278	26.1927	5.08003	13.0711
CCG001588	0.255118	0.161542	0.108159	0.145922	1.22796
CCG001592	30.2017	27.9353	15.0264	8.84921	8.32215
CCG001594	1.60115	2.47049	15.5217	11.3588	24.821
CCG001595	7.29292	6.1005	0.835165	0.67858	1.10905
CCG001599	1.93981	0.97488	1.86236	2.15554	0.319535
CCG001604	102.209	201.477	274.853	284.379	250.336
CCG001616	1.67556	1.10856	0.642223	0	0.147544
CCG001623	18.7508	13.7075	31.618	34.006	37.2167
CCG001629	2.6412	1.73191	4.82853	3.42955	11.715
CCG001631	10.086	11.4073	1.60417	0	0.186479
CCG001632	14.4261	20.9156	3.69265	0.974282	2.32014
CCG001633	0	1.1695	0	0	0
CCG001634	84.5788	86.0977	6.9156	0.720261	1.24853
CCG001636	0.154598	1.05227	0.33956	0.154436	0.814265
CCG001638	38.4531	27.141	14.1387	22.2351	24.8564
CCG001639	1.41831	1.86759	2.13979	1.53996	4.9409
CCG001642	9.34368	7.55583	13.1973	12.8453	24.7673
CCG001644	23.9694	25.9456	13.8562	9.23383	10.512
CCG001647	6.79267	4.45782	1.63954	1.82706	4.66644
CCG001651	0.507313	1.1028	1.0009	0.40044	1.33645
CCG001653	103.544	30.6217	102.212	97.767	81.7809
CCG001654	1.49973	0.857192	7.32318	7.41057	9.74912
CCG001655	1.55214	1.30983	0.241146	0.0402159	0.00809889
CCG001661	0.604638	1.50657	5.36078	3.45976	2.7033
CCG001662	138.601	132.03	344.356	621.081	193.518
CCG001663	51.4642	63.016	68.7406	49.239	122.701
CCG001665	12.9936	13.1239	3.5	1.57151	1.34071
CCG001682	0.481037	0.931809	1.58111	2.45192	2.79384
CCG001683	0.172247	0.817089	7.03533	0.791886	10.4394
CCG001689	20.5915	20.1325	3.76534	2.64565	5.87248
CCG001692	5.91688	6.69499	7.37955	4.37762	12.8099
CCG001697	0.327329	3.93	4.52696	5.13729	6.20447
CCG001698	0.56493	8.60535	5.80407	5.71233	15.7732
CCG001705	28.073	10.4767	2.87504	0.171126	0.353074
CCG001719	20.7192	16.7288	8.28491	10.4199	8.91937
CCG001721	7.58054	24.6972	4.47841	2.32283	1.87208
CCG001723	200.118	104.498	70.0991	44.9375	39.42
CCG001724	3.97825	4.78843	4.52137	1.92628	1.35435
CCG001725	108.808	64.0459	343.646	194.848	210.289
CCG001729	440.419	452.543	180.077	6.99144	7.33252
CCG001733	82.5115	89.1821	95.1584	155.169	72.7811
CCG001745	6.91291	7.01093	1.96059	0.615292	1.66688
CCG001746	9.65417	10.8484	22.2961	36.2985	2.96919
CCG001747	0.43937	0.846643	2.26316	2.5394	2.74379
CCG001751	0.301244	0.277117	0.659309	1.44867	0.201196
CCG001754	36.433	67.9199	164.74	96.0291	64.8388
CCG001759	102.416	180.443	146.734	167.076	151.495
CCG001760	35.8228	23.6697	52.0481	119.761	86.2605
CCG001764	40.3135	41.9238	20.5267	9.22159	12.2175
CCG001767	4.65635	2.48079	3.53289	1.80453	0.753955
CCG001769	11.5756	19.0652	7.25352	4.05049	8.56337
CCG001770	13.5443	51.4809	63.2925	61.5931	84.7908
CCG001773	21.0228	10.8181	34.5219	53.8099	61.8782
CCG001778	0.631188	0.706753	0.702626	0.542853	2.40464
CCG001779	0.777138	1.42233	3.56816	2.8278	2.69268
CCG001780	2.28857	13.0367	9.5302	8.48739	4.16485
CCG001782	0.828255	1.05164	2.32804	0.628509	0.16323
CCG001783	6.02497	3.9492	6.26284	18.3412	7.11738
CCG001787	0.551454	0.485647	1.75017	0.522777	0.141324
CCG001789	4.6328	2.10117	12.1096	2.08283	2.67597
CCG001790	0.803741	1.83024	4.29785	3.50994	3.52538
CCG001791	0.79729	0.416116	0.615901	0.792837	2.43285
CCG001807	37.0385	32.5299	18.5874	9.23966	16.4523
CCG001815	10.1903	12.2068	4.95787	0.119345	0.420757
CCG001816	75.9262	155.977	90.8148	63.4892	43.6245
CCG001818	0.199539	0.267199	0.966008	1.67135	1.43772
CCG001822	0.996412	0.581881	7.01734	13.1532	17.7428
CCG001823	48.7918	174.905	225.444	51.705	39.2518
CCG001825	7.40142	28.165	6.5948	5.78351	8.01762
CCG001829	8.87638	9.80532	5.80784	1.23977	3.24595
CCG001830	3.18498	5.54856	0.620851	0.0796381	0.0922798
CCG001831	17.0232	31.6208	2.82133	0.749654	0.566016
CCG001832	11.2215	10.479	6.77385	2.76488	9.42016
CCG001836	36.7036	44.4395	87.6035	94.9854	69.4019
CCG001837	3.80023	5.31464	6.02698	8.50054	7.93969
CCG001838	11.4562	25.4934	8.28709	8.04	16.0363
CCG001839	33.6774	18.8355	9.323	12.5344	17.8235
CCG001841	27.5339	22.7427	40.602	47.9491	37.5214
CCG001842	40.5484	48.5282	92.5589	113.758	121.701
CCG001843	11.4016	11.4071	10.7946	23.4033	40.065
CCG001844	31.613	36.9583	62.1064	55.2722	43.2331
CCG001846	1.47941	8.1096	3.78955	3.73618	2.85087
CCG001848	20.1146	61.6901	26.0708	21.3454	25.7597
CCG001850	0	0.0479364	0.5409	0.690268	1.88642
CCG001852	99.0701	96.733	48.7773	19.5269	40.6075
CCG001853	1.58946	49.4205	13.2391	6.88921	21.5785
CCG001855	27.4696	28.7183	64.9671	71.5918	52.7326
CCG001859	1.53694	0.546963	0.049369	0.00527235	0.170848
CCG001860	10.6308	5.07199	96.427	288.602	137.689
CCG001869	129.354	56.0097	48.0486	55.8026	15.2739
CCG001870	13.7868	5.08171	176.581	242.591	53.1289
CCG001871	22.3659	21.7165	46.9974	53.3238	28.5503
CCG001874	0.0634797	0.810066	0.0747171	0.102914	0.392592
CCG001876	17.5303	22.3336	32.6253	26.9933	25.0335
CCG001877	51.9182	46.8018	37.1657	17.1132	40.7688
CCG001882	1.26526	0.372038	0.399811	0.143424	0.224781
CCG001883	0.444797	0.382315	0	0.0236053	0.0769425
CCG001884	10.5178	8.36161	5.53351	4.94097	4.60469
CCG001885	17.9953	15.1929	7.05735	5.79874	8.91274
CCG001887	140.8	155.448	118.06	64.4636	63.7043
CCG001888	7.26454	11.3562	9.00656	0.209561	1.35545
CCG001893	66.8284	33.1022	8.314	3.632	2.61831
CCG001894	8.27818	8.8292	23.3693	30.6555	10.7427
CCG001895	0.468901	8.1416	10.842	5.9743	4.44202
CCG001897	122.648	91.9062	16.3575	1.84788	5.04701
CCG001900	3.84786	4.78992	1.82755	3.20412	9.33312
CCG001901	6.25641	6.54802	3.6844	1.65347	4.44287
CCG001903	1.1943	2.61564	1.09831	0.158284	0.089278
CCG001905	4.82082	5.64923	3.42853	1.24171	1.93209
CCG001906	3.65852	2.30161	0.703788	0.384348	0.196536
CCG001910	3.58983	4.20245	2.61935	0.797148	1.2443
CCG001913	200.326	222.706	338.116	361.031	349.807
CCG001916	34.2027	51.1966	159.61	264.493	297.313
CCG001917	1.89504	2.53014	5.20997	9.40282	22.1435
CCG001918	0.308661	0.373678	0.809479	1.00523	1.79118
CCG001923	8.86154	5.33127	2.00383	2.56303	15.2419
CCG001924	45.8228	39.0693	26.4173	28.1845	86.8881
CCG001929	1.81962	1.68676	1.04649	0.0325297	0.184927
CCG001931	0.226743	0.119839	0.0624391	0	0.13009
CCG001932	38.0157	25.0551	10.9311	10.6515	20.4024
CCG001933	63.1268	76.1086	128.599	106.124	102.174
CCG001934	39.8491	36.8296	124.4	126.568	69.117
CCG001936	59.0034	57.8059	180.278	81.9148	6.97046
CCG001937	48.5283	46.3697	153.039	69.6286	5.71125
CCG001939	52.5952	44.2514	151.02	53.7819	4.44958
CCG001945	778.264	794.115	370.655	206.137	1073.16
CCG001958	62.9123	35.1856	18.7598	7.47983	16.2744
CCG001959	5.41253	5.02875	2.38974	1.17662	3.08956
CCG001961	12.8544	11.3258	2.91852	1.23834	1.3314
CCG001962	75.2333	74.9055	134.416	245.285	83.8539
CCG001963	1.96255	8.77123	14.8253	15.5335	7.47352
CCG001965	14.8442	15.6074	23.1493	19.196	27.3846
CCG001966	1.38429	2.17035	2.65337	1.41287	7.9254
CCG001971	11.9604	3.68103	23.7846	30.4655	9.74217
CCG001974	54.8439	64.4843	91.4683	91.0718	103.389
CCG001988	1.02353	2.29441	8.22596	11.7051	16.6547
CCG001992	4.35656	3.34379	1.16072	0.0344218	2.11995
CCG001993	5.33663	4.14056	0.966194	0.262358	3.78469
CCG001996	75.5049	88.3763	185.107	145.744	197.128
CCG001998	4.86708	5.08829	2.73016	1.13494	2.74579
CCG001999	4.49347	3.3248	1.4866	0.488545	0.669679
CCG002002	20.3522	7.01941	6.7138	12.3614	10.9072
CCG002003	4.76002	2.86038	1.34455	2.15869	2.55474
CCG002008	2.28077	1.03707	2.5633	19.8617	6.85321
CCG002009	0.319519	0.442895	1.10029	10.9822	2.92106
CCG002010	2.09171	2.46426	1.02607	0.181312	0.0576266
CCG002011	79.4826	204.328	729.489	1723.05	852.18
CCG002013	5.55748	3.91316	10.789	13.1142	32.9068
CCG002014	0.371276	0.215709	0.806686	2.45599	2.90911
CCG002016	0	0	0.304261	1.09452	2.86146
CCG002017	0.635789	0.530766	8.75651	88.1727	72.484
CCG002019	0	0.0486893	0.597059	2.0098	1.49506
CCG002023	29.0376	41.2526	169.396	190.604	215.079
CCG002038	75.6381	72.1412	62.177	40.9844	28.5535
CCG002039	19.1605	44.2592	42.647	13.9343	11.7216
CCG002043	7.96735	10.361	4.61568	0.878919	3.18204
CCG002044	15.4941	19.3913	39.487	53.8162	38.4238
CCG002045	5.01658	5.50572	1.71165	0.189387	0.762048
CCG002046	20.8972	23.0308	15.0255	7.49787	23.8135
CCG002047	0.898372	2.15731	2.02041	0.982384	1.02122
CCG002048	39.6407	121.092	91.2691	40.942	29.4565
CCG002050	29.1945	19.317	12.1376	11.3399	14.5116
CCG002064	0.251658	0.448372	2.88684	1.43376	2.91943
CCG002067	0.413735	0.178746	0.0969523	0.0150961	0
CCG002068	1.93784	1.98088	1.26786	0.51256	2.32881
CCG002069	128.853	147.056	104.447	25.2276	7.64428
CCG002071	1.2061	4.78746	5.73304	5.75789	19.467
CCG002072	0.127204	0.489965	1.87458	1.75878	6.55338
CCG002073	0.013076	0.133025	0.198863	0.10011	0.359015
CCG002076	40.3686	68.6168	72.7904	51.7744	20.8919
CCG002083	0.0628264	1.25321	0.104232	0.373136	0.415096
CCG002085	0.973939	1.91271	1.338	0.627683	2.22288
CCG002087	0.331997	0.583825	0.60209	0.475802	3.6448
CCG002097	0.300435	0.964267	0.420394	0.135269	0.185665
CCG002110	13.5946	49.1023	26.0297	15.2048	45.8897
CCG002111	36.684	31.8687	24.9258	24.1102	14.2319
CCG002113	166.355	120.24	29.4988	17.5413	7.55757
CCG002117	0.0166112	0.574908	0.0629658	0.0290079	0.0658522
CCG002119	0.300786	0.200476	0.203562	1.6952	1.24693
CCG002122	7.82359	85.1067	75.8569	73.0623	97.1741
CCG002123	3.67661	4.16166	4.14423	4.04943	9.64876
CCG002124	4.5787	4.79118	4.5444	6.43652	12.0615
CCG002127	0.0383215	0.107117	0.0367632	0.504114	0.441801
CCG002128	5.91543	8.51511	10.3833	18.4568	42.7432
CCG002129	5.5742	42.439	34.3065	0.183955	0.400125
CCG002133	3.28318	4.67438	2.13628	1.14421	5.55196
CCG002137	3.14524	2.51263	17.015	14.3087	13.4154
CCG002138	18.4064	15.9325	19.9592	6.70221	11.4798
CCG002141	73.5709	48.8645	77.4099	75.1652	33.1273
CCG002143	24.5341	23.8961	20.7002	10.8367	10.1581
CCG002153	0.0683168	4.27904	0.853828	0.0347211	0
CCG002154	1.87995	2.19695	0.627487	0.137969	0.0554729
CCG002155	1.88473	1.57313	0.364916	0.0845064	0.162915
CCG002161	3.22152	4.1628	0.455496	0	0.138876
CCG002162	46.9556	41.4031	21.3743	17.4635	22.5208
CCG002165	123.58	266.149	199.554	242.708	345.668
CCG002171	0.254413	1.79025	23.5201	64.9815	31.4957
CCG002176	106.829	80.6306	65.7586	114.607	41.501
CCG002177	10.0302	10.7108	18.9304	20.6072	17.0667
CCG002178	16.7394	14.6574	5.83255	2.80906	4.18803
CCG002179	14.9846	25.8561	16.5463	4.74941	7.5948
CCG002182	25.6255	84.9289	84.8182	89.4041	215.682
CCG002183	273.366	270.796	143.082	43.7712	43.5811
CCG002185	123.791	105.692	234.838	307.863	188.056
CCG002187	22.7301	24.4801	28.1117	24.1378	44.8252
CCG002191	17.4228	27.1377	41.3592	33.7174	23.0325
CCG002199	0.741346	2.07551	1.18645	0.392293	0.902848
CCG002206	1.83595	1.06799	1.0136	1.61494	0.770303
CCG002211	0.0446388	0.305329	0.286647	0.694476	0.617113
CCG002213	0.384822	0.583776	0.5026	0.619505	1.02998
CCG002214	0.493564	0.497114	0.567931	0.786634	2.29405
CCG002252	1.08975	1.30227	0.484401	0.205408	0.54226
CCG002258	37.6313	38.5195	49.6183	68.702	45.979
CCG002261	2.51648	2.97568	1.50393	0.595353	2.17736
CCG002263	55.3848	102.983	62.9897	51.5286	223.096
CCG002264	84.5305	78.9962	33.398	29.0235	34.3593
CCG002268	7.6474	10.503	8.0364	2.98176	4.71626
CCG002269	58.6397	115.837	21.6686	8.7709	9.77624
CCG002270	0.944858	0.182031	0.0255075	0	0.113709
CCG002271	33.314	20.1077	12.0387	20.5841	7.37201
CCG002273	46.0035	44.0923	25.6999	20.9721	19.6984
CCG002277	98.3353	101.945	350.971	406.986	142.347
CCG002279	17.1226	22.7318	34.6505	20.9184	19.0121
CCG002280	2.3009	10.0843	4.8045	2.58716	2.44065
CCG002281	51.9591	67.8233	91.0578	80.3279	58.2146
CCG002282	155.235	144.885	80.4272	42.6035	44.4856
CCG002284	0.238406	0.349901	1.19072	1.29181	0.206088
CCG002285	0.586271	0.776679	8.10065	11.2302	1.87684
CCG002286	19.0364	27.4177	14.4301	5.38459	5.16316
CCG002287	19.0952	22.9488	35.0891	23.1128	48.4686
CCG002288	69.953	32.7805	20.4077	5.81113	8.06167
CCG002290	48.3191	43.1926	37.9257	11.1057	11.7976
CCG002292	248.013	233.083	104.532	64.3094	70.9214
CCG002295	18.2979	12.688	4.5456	5.49763	6.87592
CCG002299	61.7462	11.4446	9.97033	15.1575	27.0944
CCG002301	45.5625	39.7608	41.3703	28.1797	16.8157
CCG002302	5.71505	3.97799	4.13663	9.63956	9.89806
CCG002303	19.0823	10.7377	8.47063	2.99997	7.24771
CCG002304	6.7461	14.6217	9.15199	11.3341	7.79957
CCG002305	19.6967	45.0158	20.872	21.9665	46.1621
CCG002314	4.52269	3.15343	3.23995	1.50408	0.890645
CCG002318	0.390168	2.77473	1.05493	0.809878	1.46079
CCG002319	14.9175	60.8256	42.4942	34.9515	81.2517
CCG002320	35.1251	34.9855	13.6812	12.9856	26.1447
CCG002321	34.0272	36.0064	9.05251	1.09955	4.3647
CCG002323	0.92604	1.13334	1.13161	0.664032	0.314579
CCG002327	12.4417	8.01559	10.1361	14.9837	5.12796
CCG002329	1.20451	0.86784	6.55769	5.13039	3.31601
CCG002330	9.50918	9.37193	11.8046	11.2505	29.4272
CCG002332	417.989	390.351	253.565	137.152	349.904
CCG002333	14.6261	8.864	17.3664	21.871	5.65485
CCG002337	99.2332	90.3471	47.8785	42.1712	41.6964
CCG002339	5.02082	34.5636	16.0785	16.6472	29.4211
CCG002342	2.29071	2.91121	1.0039	0	0.163402
CCG002347	0.886182	1.0242	0.23672	0	0.218749
CCG002348	28.9794	15.47	3.24679	2.03848	2.79113
CCG002349	28.4141	47.8354	123.162	175.913	375.181
CCG002352	1.08626	0.528713	0.599716	0.147997	0.0624663
CCG002353	18.5015	40.7489	25.0841	24.3688	14.7026
CCG002354	0.929545	11.5117	11.2894	11.6741	9.41929
CCG002356	18.8493	59.5415	26.9731	28.8001	30.1614
CCG002357	0.114254	0.276741	0.851294	0.976931	0.270375
CCG002358	34.5594	45.6231	52.1274	68.5942	42.9068
CCG002361	41.746	43.1915	17.6101	4.06038	2.82398
CCG002362	12.3827	17.3237	21.0956	21.2678	14.9565
CCG002364	27.0084	28.5362	8.26897	1.08594	2.33321
CCG002365	8.02286	14.8446	15.7225	10.658	8.95179
CCG002368	7.08767	5.52645	4.21085	3.95389	0.876784
CCG002370	7.6995	6.64598	2.72311	1.13192	4.69853
CCG002374	8.10084	17.2112	10.4417	6.87357	6.66932
CCG002376	27.2726	8.62531	38	72.841	13.9929
CCG002377	75.8481	71.7305	46.9992	35.8483	32.0695
CCG002389	36.8133	32.8373	38.2373	57.9495	33.1237
CCG002392	5.95361	5.33446	2.55945	1.66266	6.72823
CCG002393	6.43758	4.99631	2.90326	1.51905	7.84346
CCG002396	46.5565	73.5945	206.534	150.353	43.3591
CCG002398	7.21683	7.42329	3.84263	1.6437	5.35979
CCG002403	24.6878	25.7657	11.5025	7.47709	10.1457
CCG002404	50.7785	51.3725	100.974	96.4723	72.539
CCG002405	6.32641	4.64828	8.4217	10.322	7.56076
CCG002406	38.7399	34.1273	13.687	6.61585	7.92065
CCG002408	40.7337	42.577	23.0909	9.74308	31.05
CCG002415	25.8628	28.3905	24.6588	9.85824	2.93006
CCG002416	23.0049	24.2792	21.7569	7.97994	3.25164
CCG002417	3.49402	2.21667	1.6831	1.43792	1.26974
CCG002419	9.9079	11.1152	5.84201	1.08231	1.93219
CCG002421	1.22354	0.535178	0.0958017	0.1072	0.351648
CCG002422	2.03115	1.54293	1.18654	2.54846	0.366619
CCG002423	0.648297	0.461302	4.39876	22.8251	10.0922
CCG002427	9.8721	8.02163	1.84009	0.488107	0.877955
CCG002429	9.95191	7.99002	6.53874	3.02604	4.97118
CCG002430	4.35881	2.86244	3.30231	2.83514	1.72003
CCG002431	30.6911	19.6645	8.51146	18.6329	16.655
CCG002436	0.828366	1.3068	0.837121	0.85593	2.23983
CCG002438	9.17864	17.3217	17.2166	20.7825	45.0797
CCG002439	32.6294	30.2769	16.5348	14.4607	12.7141
CCG002441	128.759	125.751	78.2521	46.4219	111.598
CCG002442	9.75798	8.03168	3.03561	1.81153	0.975696
CCG002443	1.83685	1.99848	0.0753376	0.273088	0.199519
CCG002453	0.576785	1.21432	1.35846	1.61671	1.78302
CCG002455	22.1112	35.0973	47.9087	61.1755	64.0832
CCG002456	9.91387	9.99675	13.6841	19.6184	26.5625
CCG002457	48.4048	43.3269	29.7472	15.0427	35.3246
CCG002458	12.4343	10.4862	12.8954	21.1285	12.6024
CCG002467	59.1785	22.9361	30.5582	54.3843	66.1401
CCG002472	0.210028	2.2593	0.522715	0.158706	0.157776
CCG002474	0.756667	2.11959	2.67725	0.572723	1.73898
CCG002476	5.72684	2.75513	0.907108	1.01659	1.62718
CCG002477	9.94333	6.36344	4.04413	5.7521	8.23636
CCG002482	18.2778	42.3257	44.9887	35.7115	51.6171
CCG002484	9.38984	8.41295	6.54173	5.2097	2.04258
CCG002485	36.1555	45.3617	84.7468	135.783	114.095
CCG002487	15.7961	17.6289	20.5099	24.4826	33.0487
CCG002490	0.271652	2.44251	0.176383	0.0459607	0.30407
CCG002491	32.9256	23.5123	16.8349	6.83017	5.10748
CCG002492	9.75982	44.6012	22.7635	23.632	15.3298
CCG002493	87.5924	140.365	354.399	312.852	115.997
CCG002495	26.6618	30.5758	32.1467	19.5241	49.8084
CCG002497	4.51687	3.76155	3.74173	2.48929	1.68005
CCG002498	3.26221	4.85256	0.823637	1.02196	1.94536
CCG002505	8.03456	7.38004	6.06881	3.20967	3.63699
CCG002507	9.63447	6.91123	1.12906	0.382235	0.704421
CCG002509	0.0207294	0	1.48985	2.25906	1.10078
CCG002514	0.03199	0.0960204	0.619776	0.237283	0.15961
CCG002516	3.76835	7.44786	2.68745	1.7483	1.41028
CCG002517	18.2504	27.2121	7.12186	2.35029	4.40151
CCG002520	0	0	0.0601859	0.220606	0.321756
CCG002521	14.8675	14.5505	36.8609	23.8481	19.4226
CCG002522	9.27615	7.08631	18.9928	12.5488	8.61767
CCG002524	34.8777	10.6267	6.10267	11.7674	13.1785
CCG002527	10.6519	6.60973	4.09805	14.8471	10.4607
CCG002536	86.2727	36.1112	1.85725	0.203541	1.73547
CCG002537	7.19179	3.70734	0.50202	0.246094	0.717582
CCG002538	0.0732863	0.149318	33.898	42.0569	10.4733
CCG002539	15.4827	10.1833	14.5937	13.7985	2.09231
CCG002544	2.78634	2.09648	0.992131	0.8565	2.88742
CCG002545	45.1361	37.7916	47.3248	63.3381	89.7402
CCG002547	127.815	195.288	232.601	231.895	249.325
CCG002548	43.786	37.693	20.4647	9.81546	27.4233
CCG002549	59.5111	64.3837	78.0087	65.9761	122.623
CCG002553	16.5502	13.7572	11.0835	17.1216	32.0226
CCG002554	74.8372	69.2182	46.5341	28.4395	39.1247
CCG002555	38.971	21.5706	1.87302	0.107688	1.02805
CCG002556	28.2298	28.6521	24.8455	15.2469	61.6019
CCG002557	3.93399	4.45482	2.04803	0.755065	0.631944
CCG002559	16.1202	15.8048	11.6525	5.42338	14.5348
CCG002562	33.8004	38.2762	26.7706	7.8374	1.80138
CCG002564	19.41	12.6645	10.4912	3.88955	4.55141
CCG002567	16.5461	12.8025	6.85724	10.2616	14.1126
CCG002568	53.2093	116.908	174.982	172.42	100.445
CCG002569	20.9922	24.3828	29.8856	33.2897	22.1029
CCG002570	138.751	207.225	311.296	150.694	63.8668
CCG002571	410.549	377.933	193.76	127.761	342.481
CCG002574	21.5324	21.4042	30.9707	41.461	24.6666
CCG002575	3.63391	4.71509	4.37668	6.78263	4.19351
CCG002579	1.26727	3.4445	2.1387	0.154467	0
CCG002580	1220.93	1309.3	4161.19	5791.52	6908.25
CCG002592	137.27	157.215	66.0359	45.0096	24.278
CCG002593	40.9591	40.5267	30.2663	10.3923	2.93979
CCG002596	14.7785	17.1988	46.4613	48.6844	39.9725
CCG002601	2.62784	2.80542	2.44096	1.15528	0.59818
CCG002610	5.77662	6.92963	4.31512	5.3559	13.1011
CCG002611	24.4299	8.11043	3.05768	1.10963	1.14285
CCG002612	33.5289	34.0412	97.5651	35.7619	38.908
CCG002614	37.6352	42.3859	45.49	61.819	33.6252
CCG002616	6.15244	4.62974	1.92641	1.13136	1.44853
CCG002617	19.7287	9.62944	2.91773	3.04337	5.17388
CCG002618	2.28369	1.03224	0.402247	0.375587	0.314938
CCG002623	0.04896	0.0609814	0.61108	0.146904	0.0319707
CCG002625	0.0669238	0.0820789	0.166685	0.766008	0.893304
CCG002628	32.7715	26.7014	33.5325	60.3511	36.8347
CCG002629	5.98519	3.23847	3.33082	10.5452	4.43258
CCG002636	459.655	258.656	305.098	352.887	197.334
CCG002637	21.5132	75.5409	149.796	76.0344	35.4018
CCG002638	13.6358	11.9434	6.55576	3.62923	4.38297
CCG002640	46.3721	41.2239	79.6321	64.9475	50.3717
CCG002644	9.27455	8.19817	12.2466	15.6824	18.2533
CCG002645	31.286	34.2272	45.4068	51.8952	53.5395
CCG002646	1.88589	11.7768	3.26505	2.12161	4.18661
CCG002648	26.5084	32.3323	52.1912	42.7363	51.9293
CCG002657	26.8461	19.1934	102.386	67.7431	63.5929
CCG002660	37.2599	43.9702	77.8032	87.4125	43.7167
CCG002661	21.5098	15.2076	52.1486	46.8092	20.688
CCG002665	5.15533	3.65644	1.59472	1.22037	5.97666
CCG002666	57.0602	45.8878	24.975	25.6937	25.3895
CCG002669	685.235	468.723	287.201	231.747	159.441
CCG002671	3.19411	5.73347	7.53588	5.40422	10.0413
CCG002675	8.65991	6.1941	12.899	13.6172	2.20334
CCG002676	525.001	485.986	355.333	380.697	166.365
CCG002677	87.9335	196.811	485.101	266.906	573.46
CCG002679	1.23904	0.272796	2.16623	4.97656	2.92192
CCG002680	5.01111	3.00845	2.02422	2.9672	2.09577
CCG002686	8.30173	5.35928	11.6576	21.5021	14.2552
CCG002694	4.96361	7.92077	9.65198	4.5377	7.80685
CCG002695	15.8949	14.254	9.80024	4.94012	12.713
CCG002699	0.816028	0.54421	0.381853	0.156937	0.350326
CCG002702	1.96875	1.10811	0.956484	0.622816	0.607909
CCG002704	1.86173	1.69404	3.98503	2.57448	3.07083
CCG002707	76.3571	51.6397	2.13569	1.77481	0.224229
CCG002709	7.44873	7.12585	2.02403	0.603387	0.800965
CCG002711	1.00128	1.20542	5.89625	0.490029	0.0597536
CCG002713	34.3166	31.6462	12.972	3.5488	4.86522
CCG002715	10.048	11.0378	18.872	12.7763	14.0098
CCG002717	92.5638	87.1284	111.354	147.016	92.9133
CCG002721	4.29256	2.73622	3.36634	1.25111	0.189956
CCG002728	2.89873	1.40966	0.0974688	0.13883	0.322438
CCG002729	0.0213326	0	0.669524	0.0342251	0.0122156
CCG002730	265.013	74.5397	142.053	279.759	233.115
CCG002731	4.45105	1.3366	2.24514	0.907795	0.315491
CCG002733	86.3665	46.8967	15.4924	29.7527	18.5011
CCG002735	19.5906	21.6979	10.99	3.14685	7.48783
CCG002736	15.8621	16.8427	7.99175	3.19189	6.37125
CCG002739	8.93865	10.2467	2.94018	1.32513	3.52197
CCG002740	13.3546	16.2929	4.55205	2.46956	6.2821
CCG002742	1.46415	1.00949	0.680416	1.49459	5.06713
CCG002743	6.27413	4.74159	2.35781	2.44559	3.4616
CCG002751	26.1702	27.903	12.8893	4.78122	13.3557
CCG002752	34.0147	76.7792	53.1872	45.4046	206.972
CCG002753	3.41322	4.1899	5.79695	5.10593	7.67548
CCG002757	31.5917	11.3797	99.951	70.3186	3.84715
CCG002759	127.172	895.995	581.455	234.799	209.789
CCG002762	2.09457	1.9437	2.00671	1.10073	0.638544
CCG002763	26.8413	17.3407	12.9181	9.91264	21.2782
CCG002766	0.627706	1.10952	1.27209	1.1514	2.46199
CCG002767	3.00078	2.88035	15.408	18.5827	47.6589
CCG002768	23.901	27.9597	17.0074	8.51044	11.7549
CCG002771	0.155381	1.35823	0.141507	0.110619	0.269007
CCG002774	6.79932	4.93706	2.74472	3.70482	12.6621
CCG002783	2.21819	22.3949	2.88196	3.62256	3.10957
CCG002784	3.27991	16.6754	4.52103	3.63161	5.08282
CCG002788	0.899408	2.19208	0.791257	1.18175	1.50635
CCG002790	30.1397	30.9883	11.9801	2.30043	10.0214
CCG002793	15.0203	11.0094	7.05471	5.98729	5.75715
CCG002794	0	0.495676	0.0893758	0.0112004	0.0530212
CCG002796	38.7145	66.7443	255.151	290.232	123.054
CCG002797	0.15123	0.953392	5.01142	5.48218	1.37135
CCG002804	16.1328	4.85557	2.70033	0.648862	0.110807
CCG002805	26.3664	23.5583	70.0834	71.0027	36.6044
CCG002806	90.8169	87.0453	80.2003	33.8446	46.2917
CCG002807	58.8925	60.4931	45.905	16.1001	7.73176
CCG002816	48.3018	41.6881	22.1339	18.5363	31.6016
CCG002819	15.2676	32.7868	29.4341	16.1452	24.8425
CCG002820	47.7406	53.3401	53.5342	43.982	21.6767
CCG002821	64.6644	65.6555	44.7474	30.9729	22.0032
CCG002823	0.283331	2.30732	1.02832	0.193857	0.305752
CCG002824	8.45328	5.89635	6.24917	2.28307	1.13954
CCG002825	30.8797	26.9926	68.1696	106.35	44.3892
CCG002829	10.6097	11.3717	6.76442	1.93093	7.99157
CCG002830	2.05907	0.658302	0.0606783	0.0571272	0.0602179
CCG002833	3.33546	3.83819	12.0861	12.0678	62.5939
CCG002834	164.281	71.8192	96.5531	133.154	104.842
CCG002841	46.1515	29.1468	5.38678	4.5777	3.29985
CCG002842	8.61316	7.50148	4.73813	3.11714	5.14858
CCG002849	7.05434	7.25613	5.08731	3.92621	2.00254
CCG002850	6.6667	43.9596	25.0958	29.934	24.9488
CCG002851	5.17899	12.3056	12.1999	6.25075	4.63187
CCG002853	28.3622	10.7803	4.29731	2.63493	2.79227
CCG002855	3.77532	3.96679	2.39462	0.659108	0.734317
CCG002859	40.0585	32.5878	17.127	12.4737	33.9824
CCG002864	36.8378	37.045	144.415	48.9948	81.0337
CCG002865	16.5644	18.1565	67.3458	25.0543	43.418
CCG002866	1.2257	1.13695	4.98835	1.85267	4.19492
CCG002867	21.2488	22.3788	81.9315	27.6479	46.8769
CCG002871	9.11889	10.7007	4.97172	0.531075	0.0439254
CCG002872	34.9357	86.0041	76.3017	63.9817	173.418
CCG002874	6.13892	5.59519	1.86314	1.25589	4.58428
CCG002876	0.990111	1.34981	1.5	1.26877	3.77443
CCG002877	8.08567	12.3657	27.6887	23.4698	29.4363
CCG002884	12.9732	48.0529	18.0288	12.2789	10.3999
CCG002887	1.0845	2.68558	1.37191	1.12859	1.14952
CCG002890	14.6286	35.8623	23.2687	16.4141	14.8092
CCG002892	35.6865	95.9697	60.0568	36.9388	40.0224
CCG002894	0.969649	3.09875	70.2964	67.0206	178.898
CCG002895	1.15896	1.83499	41.3023	62.0481	155.935
CCG002896	0.759108	2.17697	39.1305	38.3162	98.0767
CCG002897	0.325584	1.62171	26.3166	23.3284	76.0826
CCG002898	0.217854	0.622861	9.29819	7.46637	19.9574
CCG002899	0.178177	0.932814	6.23327	4.79064	12.4193
CCG002900	159.872	146.453	72.432	49.1398	61.6677
CCG002904	227.437	248.885	316.824	358.233	415.279
CCG002905	1.23121	0.645061	0.598548	0.363556	0.520405
CCG002907	3.5664	2.37341	3.46125	8.1186	4.17113
CCG002908	149.823	137.335	350.1	306.727	83.5427
CCG002909	4.05696	6.09099	5.20031	10.5685	4.18556
CCG002913	33.3319	32.5699	10.5304	5.40269	4.68051
CCG002914	0.0876508	0.069704	0.0840329	0.858866	0.0563138
CCG002918	47.7535	40.9315	21.1983	15.813	24.1482
CCG002922	0.527426	0.421407	4.27233	2.60364	1.39639
CCG002923	1.18138	1.17191	6.76848	4.83104	3.49698
CCG002925	0.705293	0.22648	0.11759	0.057508	0.16209
CCG002927	16.092	16.3293	11.7668	7.76502	5.26952
CCG002928	43.3738	38.6087	4.73777	2.7138	7.06507
CCG002929	3.91742	2.57478	2.46181	0.734761	1.39937
CCG002931	0.970047	0.278979	0.305717	0.0461096	0.0478597
CCG002934	3.08868	15.3924	1.54214	0.305326	1.01868
CCG002935	4.17392	7.68078	13.0099	10.7386	36.9525
CCG002936	75.4725	211.617	145.82	125.019	88.3844
CCG002937	67.1447	46.1602	20.7552	18.9343	22.4713
CCG002939	208.153	182.737	108.904	134.04	85.7973
CCG002940	13.8047	16.089	17.1563	22.8531	24.0313
CCG002942	4.1637	3.72265	9.50867	15.4207	3.90087
CCG002944	0.236423	0.110568	1.27486	1.17603	0.0917393
CCG002946	0.101737	0.051862	0.18136	0.379001	0.209254
CCG002949	21.3563	56.3839	65.4559	29.7773	57.9776
CCG002950	2.44437	1.92421	1.79083	2.30978	0.523337
CCG002951	14.8208	12.9753	9.94127	1.01746	0.345984
CCG002954	6.87179	6.83585	6.55017	11.9934	17.1362
CCG002955	24.946	23.108	23.6648	38.0055	51.1667
CCG002956	15.2645	10.2308	5.75983	4.83464	4.1463
CCG002963	0.683042	0.20805	1.7047	6.21309	3.53832
CCG002972	0.924411	1.83721	0.623675	0.775946	1.13887
CCG002980	4.7356	4.88491	37.2301	27.6184	10.4252
CCG002981	12.3895	58.7998	103.72	86.9031	57.3813
CCG002982	2.47072	24.688	61.5297	42.1251	64.6412
CCG002983	20.9217	18.5407	9.73324	5.55966	9.0548
CCG002987	16.8429	11.4903	9.0062	6.98213	6.54096
CCG002988	12.0322	18.9806	22.8976	17.225	22.7853
CCG002989	1.87596	1.47456	1.58747	0.138607	0.0163186
CCG002990	126.531	122.653	65.5807	27.8546	103.774
CCG002991	7.29836	11.2483	9.11164	1.18133	1.11638
CCG002992	31.4476	85.4674	112	23.6833	11.8003
CCG002994	0	0.0124493	0	0.00534529	0.117583
CCG002999	2.08967	0.877628	1.42574	3.37142	2.32808
CCG003001	18.9684	12.656	14.2562	26.8279	41.8838
CCG003006	66.0479	21.9798	5.06726	5.12992	10.7982
CCG003007	3.16792	3.74927	41.7862	103.573	32.4387
CCG003008	39.352	125.411	518.426	1093.94	584.536
CCG003009	1166.49	1556.63	371.472	89.4381	148.368
CCG003010	77.9421	97.891	133.086	97.7071	485.286
CCG003013	15.8269	14.8433	22.9923	27.94	11.7126
CCG003014	95.1047	95.4202	42.1302	10.9857	8.10989
CCG003017	70.2682	179.191	96.9689	72.9478	92.6668
CCG003027	0	0	0.0522201	0.48858	0.687802
CCG003028	7.60114	2.84728	1.39651	8.46099	13.3075
CCG003033	93.697	62.0052	9.852	2.21533	5.02941
CCG003036	19.8138	48.6927	9.2297	1.05306	0.771571
CCG003038	33.0935	24.7082	3.23554	0.409807	3.09809
CCG003041	0.568407	1.82153	0.978981	0.913584	2.53613
CCG003042	0.548608	1.5216	2.10876	1.34368	2.97344
CCG003044	5.7933	1.21834	1.25535	2.43948	1.04873
CCG003045	60.6281	78.8005	118.029	91.9739	157.259
CCG003046	6.60674	7.38809	2.41235	1.15858	5.27338
CCG003047	5.26161	4.35884	7.81888	13.2218	4.54008
CCG003049	1.65512	0.793876	0.0694908	0.0426853	0.161287
CCG003051	3.7559	3.30411	1.74434	0.997715	4.09145
CCG003055	6.00085	6.06405	3.30955	1.65941	1.80293
CCG003057	141.547	100.317	234.789	248.894	52.702
CCG003058	198.495	140.769	322.592	350.891	92.0784
CCG003064	13.6846	35.7088	20.758	30.4152	60.9712
CCG003065	16.2813	26.5904	36.9663	46.2249	50.0429
CCG003066	3.56545	5.84827	9.09672	11.7087	13.013
CCG003067	48.7783	44.4617	30.1319	13.707	21.298
CCG003069	3.7463	1.21416	13.4816	1.46998	0.166497
CCG003072	20.9183	32.4198	8.57717	1.68488	4.48457
CCG003073	10.5913	14.1718	3.91959	0.620547	2.39349
CCG003074	8.9072	8.67886	5.27592	2.10992	4.51631
CCG003077	15.3022	102.79	186.937	151.081	154.883
CCG003078	11.9463	13.8661	13.163	6.07528	0.690283
CCG003080	0.588955	2.93769	1.7167	1.13267	0.82551
CCG003082	21.4751	19.2364	18.8028	13.2501	9.32332
CCG003085	38.7319	30.0157	47.9735	62.8411	56.3408
CCG003089	2.9669	2.66419	0.931285	0.557632	1.37556
CCG003096	17.4952	17.1251	21.9261	27.864	19.3925
CCG003097	461.337	478.006	324.532	164.124	433.529
CCG003098	52.8311	65.6135	142.1	176.052	100.149
CCG003101	6.91261	3.34781	0.69177	0.0643882	0.520668
CCG003114	47.6428	49.0464	178.043	228.811	164.409
CCG003118	12.811	5.74722	4.36626	2.21511	7.13621
CCG003119	117.429	104.068	210.459	295.99	118.053
CCG003121	2.75906	5.11066	38.2332	28.0546	82.5524
CCG003125	0.935452	0.669182	0.581061	0.260153	0.791522
CCG003126	10.8563	6.14181	2.56192	2.62271	18.7802
CCG003129	680.771	592.585	136.319	18.7855	5.8511
CCG003130	11.2306	10.8659	3.445	1.22397	3.53478
CCG003131	11.9169	9.8423	50.4979	121.031	124.586
CCG003136	13.7144	8.65353	6.09543	7.86616	5.21436
CCG003141	2.89601	2.29291	0.772292	0.963506	1.74795
CCG003142	52.4253	8.43154	0.692988	0.518371	1.0507
CCG003143	16.2539	20.1639	7.31791	1.95085	4.64534
CCG003145	30.3917	33.5381	50.4601	34.0375	58.4935
CCG003148	36.1726	56.6365	76.3317	54.0706	32.4065
CCG003149	1.45172	16.3483	8.43568	4.6845	5.52911
CCG003150	0.994566	1.71756	1.23938	3.81618	2.19382
CCG003157	1.60149	1.37786	0.80427	0.410306	1.54704
CCG003158	5.51439	0.590294	0.659593	1.72259	2.49986
CCG003159	13.7112	14.8627	19.4223	24.5677	17.2244
CCG003160	33.9456	25.0357	9.31001	8.81417	12.2212
CCG003163	21.0053	31.8799	33.5865	20.7758	51.3517
CCG003169	26.8063	158.215	159.039	167.532	383.204
CCG003171	81.5355	79.3913	69.1712	77.1434	32.4237
CCG003173	0.0296842	0.502494	0.203923	0.141444	0.0952245
CCG003174	1.50984	1.62434	7.72678	9.87684	1.58954
CCG003175	63.6081	43.0549	38.711	36.5047	25.9546
CCG003177	17.0758	14.6258	13.281	7.16843	6.09871
CCG003179	20.8179	188.953	36.5547	30.2011	8.5627
CCG003180	14.416	9.77129	6.57475	7.14106	30.2568
CCG003181	15.2654	12.6002	7.09533	8.42831	30.2719
CCG003182	0.440762	2.35811	0.280891	0.259255	0.800364
CCG003188	5.13486	3.90669	2.66122	1.84384	3.6845
CCG003192	24.3737	21.8622	8.79933	2.03713	16.0115
CCG003196	550.532	582.939	357.22	116.926	277.94
CCG003197	2.64065	28.6283	72.9153	12.6208	9.40542
CCG003198	3.22677	10.5855	14.7113	7.25429	2.78609
CCG003199	26.9016	23.5179	6.07005	1.38432	1.29631
CCG003201	250.121	215.896	111.278	54.0017	162.083
CCG003203	6.69628	2.53951	2.59944	4.29563	8.92002
CCG003204	102.379	94.2498	16.6795	2.24067	11.2178
CCG003205	113.374	101.294	21.9872	3.03423	13.5766
CCG003206	332.546	275.541	142.78	85.9792	210.373
CCG003207	39.7632	57.5615	60.2094	37.6936	79.3832
CCG003211	35.238	28.8039	18.6099	10.0739	15.3
CCG003213	20.2745	18.8992	9.43469	4.96028	8.21103
CCG003215	1.62382	1.8428	0.847565	0.422506	1.16496
CCG003217	53.3983	91.4953	117.57	211.3	198.684
CCG003224	3.10569	1.98388	2.65289	4.25886	6.08966
CCG003227	11.4596	9.40692	2.98931	1.10531	3.21875
CCG003231	4.58399	6.67223	3.05057	1.00782	1.49818
CCG003241	1.46683	10.2445	4.40578	1.26573	1.49073
CCG003242	285.933	216.321	368.532	492.7	95.3123
CCG003243	15.5185	37.6586	24.7063	10.0832	20.9627
CCG003244	4.22534	4.19588	2.43675	1.95888	1.9388
CCG003246	120.204	115.718	63.2974	37.6874	72.0979
CCG003247	37.6961	26.8222	14.9427	10.3238	8.82791
CCG003248	56.0408	34.6932	106.364	135.419	37.2733
CCG003249	26.3065	18.2758	8.66023	8.50469	6.55398
CCG003252	10.1321	11.1557	10.6483	2.42838	0.822116
CCG003254	0.394525	1.48629	1.1492	0.167083	0.533271
CCG003255	122.839	285.796	214.543	179.914	94.0593
CCG003257	1.85123	1.92718	1.81133	0.361979	0.545657
CCG003258	0.474445	5.9485	5.60844	8.11984	28.2877
CCG003260	7.72725	6.26525	4.20325	3.76299	3.37069
CCG003261	3.51621	7.15752	7.54448	5.91897	3.54686
CCG003265	29.8927	24.8998	9.23623	10.9829	36.2664
CCG003266	31.9773	30.3039	18.4436	5.04551	5.8325
CCG003267	13.6574	10.9312	12.3907	4.58584	3.68722
CCG003269	7.57658	18.6609	10.4414	0.874705	2.23132
CCG003270	8.23753	24.415	12.3844	1.45756	2.84916
CCG003271	22.6069	23.718	10.852	4.25661	24.5856
CCG003272	1.59731	3.09607	1.75235	0.799109	2.02689
CCG003288	35.396	13.7876	31.9274	30.7863	17.8334
CCG003289	25.9573	21.6381	43.1499	52.3428	23.7619
CCG003290	3.14984	2.25642	6.49844	2.56754	0.950738
CCG003298	7.71615	9.99984	19.4877	15.0908	15.2095
CCG003300	1.66839	1.93977	1.0679	0.622829	2.68134
CCG003301	39.9179	85.7844	156.783	113.072	162.617
CCG003304	11.4766	12.9853	9.90261	4.02804	6.14698
CCG003305	4.27927	1.93967	5.17421	3.6099	9.65368
CCG003307	21.8931	20.1727	24.3106	21.2284	43.1793
CCG003308	3.245	2.56218	1.41017	0.371739	0.526472
CCG003311	10.3477	15.3115	22.994	25.9908	30.6586
CCG003314	57.3363	55.8043	171.448	93.3216	68.0567
CCG003315	13.3961	14.9412	19.1571	19.2975	35.8942
CCG003317	44.7923	34.5104	17.7778	8.40788	4.17738
CCG003319	38.5546	22.3118	12.8916	12.9521	13.0569
CCG003320	43.3592	25.4083	13.6739	14.4875	15.1225
CCG003321	0.253009	0.194453	0.565485	0.348699	1.17856
CCG003324	5.00445	3.9558	2.60153	1.62384	3.42969
CCG003332	48.0504	38.0272	67.741	77.6635	84.2965
CCG003337	99.7772	75.9789	117.718	153.723	215.972
CCG003343	265.527	265.336	194.931	88.0063	247.231
CCG003344	40.1129	42.6555	12.9239	7.93402	12.4214
CCG003345	0.138295	1.11891	0.0191816	0.032953	0.141615
CCG003347	2.28944	0.935891	0.541328	0.608831	1.57584
CCG003348	15.5127	14.6108	2.91622	1.3851	2.18542
CCG003349	420.326	184.893	72.5051	35.8482	34.6072
CCG003351	10.0769	12.3578	3.64102	1.96464	2.27558
CCG003357	52.3234	129.748	180.472	46.3599	56.8941
CCG003359	1.73557	5.13123	7.344	2.65766	3.20474
CCG003365	0.689081	0.849324	1.53156	2.40884	0.351763
CCG003366	5.14101	1.56138	13.1689	37.6394	12.5335
CCG003367	1.86572	0.628834	2.16124	4.13677	2.06115
CCG003368	25.7945	9.89319	38.5277	54.5996	31.0641
CCG003369	5.42012	4.08987	2.72424	2.12856	2.47886
CCG003370	781.342	740.646	474.463	303.965	743.255
CCG003371	12.6571	7.65336	4.67682	5.84082	11.0353
CCG003372	5.56491	2.46067	2.28641	4.48041	9.34856
CCG003375	43.3568	41.8137	52.7741	82.8129	53.8192
CCG003378	6.27759	3.92238	3.20953	3.70593	1.28402
CCG003380	1.9295	3.26919	1.47901	4.23488	1.71997
CCG003382	3.45086	16.3328	24.4774	52.2934	74.4093
CCG003383	83.4235	81.5218	56.765	26.1761	21.0286
CCG003385	0	0.341736	0	0	0.0133331
CCG003386	17.336	50.0917	18.5983	14.6191	10.4615
CCG003391	95.8133	117.837	192.286	283.392	161.426
CCG003394	1.31879	1.29903	0.304355	0.585871	0.358234
CCG003401	7.54931	4.20682	3.55748	2.85389	4.67033
CCG003404	8.60844	5.74526	6.85674	7.3817	16.3698
CCG003405	3.22466	2.78347	3.30262	2.87666	6.27253
CCG003414	6.56972	5.87612	1.71579	0.611644	1.05132
CCG003418	3.21092	2.66522	1.28457	0.94943	4.93582
CCG003419	10.1048	7.00097	24.6008	21.1222	9.47071
CCG003433	0.994786	0.712861	0.421971	0.229859	0.701883
CCG003436	1.16915	1.82359	0.704113	0.935346	0.245293
CCG003440	73.7407	47.8186	42.4025	29.4468	20.8316
CCG003441	2.45456	1.59055	1.01842	0.906876	0.80969
CCG003446	0	0.112598	0.0161734	0.0138925	0.140909
CCG003447	1.28612	0.85424	0.507237	0.047578	0.0644499
CCG003448	11.4496	7.49649	6.80214	5.4782	4.54381
CCG003450	32.3936	30.1316	9.52911	0.899434	1.87413
CCG003453	1.63974	8.17538	3.16345	2.7907	0.452387
CCG003454	33.8459	85.0823	453.398	228.614	76.9373
CCG003456	10.76	7.05418	6.82888	7.84305	2.79091
CCG003458	3.11008	2.28846	1.80604	1.13092	7.16127
CCG003461	43.6009	4.65927	3.67129	3.87392	5.21756
CCG003466	4.45113	6.21337	7.49469	8.30259	5.65743
CCG003467	4.5978	1.01653	0.951716	0.507021	0.353976
CCG003468	21.6278	16.0191	22.3043	20.6796	41.1569
CCG003472	2.01861	3.54816	5.12864	6.32261	5.32314
CCG003474	88.8239	91.0143	122.103	163.347	77.8473
CCG003475	0.724161	0.994672	0.62983	0.913912	2.0992
CCG003483	14.3199	4.10393	0.514276	3.88444	0.520966
CCG003484	13.1347	14.4738	7.53863	4.72573	11.7293
CCG003485	19.6278	18.9415	9.93185	6.61591	8.97732
CCG003486	37.0566	32.0866	12.6942	11.2774	16.7712
CCG003488	0.296086	0.266041	0.274287	0.616306	1.09803
CCG003491	140.047	112.485	44.9079	34.3568	142.794
CCG003497	52.5027	46.1339	135.661	126.248	77.2991
CCG003500	48.3636	46.3217	70.2765	81.6026	63.4363
CCG003504	9.79732	6.09269	7.67784	12.5668	2.96491
CCG003506	25.6385	23.8842	30.7394	13.5133	2.82959
CCG003507	14.9992	13.3396	16.8933	23.5473	24.8768
CCG003510	7.99589	9.15666	24.5658	13.8594	10.7739
CCG003511	169.25	142.515	693.534	749.715	104.44
CCG003517	7.25168	7.63922	5.35191	2.36068	4.31504
CCG003519	18.024	14.7821	7.87638	4.28826	7.38454
CCG003520	14.3363	11.705	11.7908	24.6842	26.883
CCG003523	1.13795	0.389024	0.109734	0.168475	0.231275
CCG003539	0.344525	0.834658	0.108284	0	0
CCG003540	3.4439	2.87896	0.382625	0.148135	0.0434499
CCG003542	9.87976	7.65997	9.07578	19.4297	7.56505
CCG003547	1.99643	6.41949	2.38039	3.55398	30.9064
CCG003552	74.6239	27.7153	77.2086	129.51	40.4657
CCG003553	13.9286	15.3148	22.5679	34.8416	20.7183
CCG003555	9.53791	3.55698	3.11661	4.91484	0.419508
CCG003556	8.16639	5.9088	13.9474	22.5158	8.2183
CCG003570	0.444712	0.500332	0.451915	0.225133	0.0273982
CCG003571	1.85229	2.33484	2.19616	0.777971	0.276865
CCG003590	84.6681	80.6719	51.676	28.5855	53.1589
CCG003592	4.79254	9.05913	6.21339	0.608047	0.284482
CCG003593	4.27688	3.55056	2.29081	0.997515	1.97842
CCG003596	18.9114	12.4008	7.9735	5.33446	3.1357
CCG003597	48.9665	129.199	148.073	49.353	43.3017
CCG003599	65.1132	45.3144	24.8026	29.9429	5.88251
CCG003600	3.80912	3.85865	2.62245	0.164501	0.300841
CCG003601	1.46646	1.25233	6.40556	13.6727	12.9365
CCG003602	0.147768	1.36739	0.69382	0.603069	0.968505
CCG003604	7.24999	3.77262	1.96108	1.30527	4.47226
CCG003616	8.19708	2.42372	8.93734	9.06406	8.73105
CCG003618	49.7242	53.099	9.38874	8.2303	14.388
CCG003620	22.97	14.0555	7.26667	4.97123	13.7012
CCG003622	212.166	221.622	124.106	68.4411	167.045
CCG003625	5.03601	6.4961	26.9359	18.851	36.4775
CCG003627	0.242152	0.18228	0.839584	0.660184	1.19447
CCG003629	44.932	35.6004	6.48638	4.15007	10.5533
CCG003632	25.0358	7.43971	61.1425	94.4781	33.8335
CCG003633	5.86369	3.4061	1.86639	13.3635	24.8259
CCG003641	16.2333	15.8397	12.1739	5.02028	2.68221
CCG003642	7.29341	32.9313	35.2852	39.3051	34.7067
CCG003643	36.51	130.805	138.358	163.434	58.8478
CCG003644	632.323	486.09	148.833	49.6808	58.8961
CCG003648	2.42148	5.70658	14.3583	4.53689	2.81225
CCG003650	79.3978	80.0402	39.8632	31.4881	33.5297
CCG003651	2.07604	2.73436	0.767494	0.203441	0.302474
CCG003653	16.3729	20.4709	5.45693	2.10514	2.61387
CCG003656	0.0171913	0.270437	0.0666067	0.00887534	0.0106686
CCG003662	14.6248	12.6231	5.63562	5.31658	17.1989
CCG003664	38.0547	36.6336	14.2447	8.01035	24.3041
CCG003667	264.227	1004.22	370.312	406.885	474.817
CCG003668	0	1.84761	0.0858827	0.287281	0.388486
CCG003671	10.9354	11.7854	17.6435	18.0791	17.0757
CCG003676	1.91265	1.49011	1.01017	0.718877	1.5617
CCG003678	170.918	47.5893	157.896	202.23	60.522
CCG003682	13.6437	4.47771	4.44382	1.32905	0.803298
CCG003683	5.20372	2.90541	1.31498	2.42387	3.65843
CCG003684	140.029	66.9937	78.1197	138.203	47.4677
CCG003688	0.979759	0.810734	0.141016	0.0627599	0.257923
CCG003697	31.9124	34.2293	68.5369	42.0435	62.7441
CCG003699	58.5403	45.9357	27.1195	23.9674	14.9772
CCG003700	15.1257	14.7125	6.42715	6.06172	11.4475
CCG003703	15.54	3.84352	5.10552	3.3358	1.20293
CCG003704	153.878	127.314	160.849	45.6282	20.974
CCG003710	1.99877	172.083	25.6323	9.12808	15.3235
CCG003711	3.64342	2.4775	1.05409	1.01512	1.81542
CCG003715	13.3632	19.7894	101.951	67.518	29.7977
CCG003716	4.1153	3.55593	4.03173	5.10389	12.4035
CCG003721	31.6886	30.1827	19.3956	12.0096	25.3897
CCG003724	83.6973	59.574	284.895	298.185	122.649
CCG003728	4.01142	3.13921	2.48832	0.772001	0.675627
CCG003731	88.2117	76.3392	193.616	127.554	77.2706
CCG003733	97.7378	87.9145	54.571	16.8731	30.8913
CCG003736	19.1555	19.8384	26.2648	5.39961	16.4526
CCG003744	11.2651	5.25572	3.77548	4.5063	8.40455
CCG003746	6.38979	7.82834	2.8479	1.08032	0.86689
CCG003754	2.09802	3.36957	7.4929	21.6862	7.47243
CCG003755	0.351538	0.598811	1.51895	4.12289	0.834364
CCG003761	15.8371	19.1091	2.99471	2.07996	0.692661
CCG003762	109.296	99.1554	43.8714	56.0233	1145.36
CCG003774	0	0.0510796	0.13661	0.471954	0.76329
CCG003779	1.62507	1.66703	6.74552	2.03325	4.29262
CCG003780	2.90498	2.90126	1.37957	0.764892	0.123746
CCG003781	1.03206	0.896432	0.630122	0	0.219956
CCG003787	17.9082	17.4586	11.7998	3.41663	2.82957
CCG003792	54.0042	61.5262	86.0472	87.934	122.394
CCG003793	1.22539	1.07527	0.774462	0.368139	0.931732
CCG003794	2.21135	1.70512	5.72841	6.97858	8.39434
CCG003798	102.056	38.9167	30.7207	47.9466	57.5247
CCG003807	450.576	440.144	215.604	30.5557	40.5879
CCG003809	33.671	37.3602	5.35013	1.83642	0.39679
CCG003810	105.375	109.045	48.9606	9.94648	2.13279
CCG003811	8.03473	7.27059	6.1947	1.65726	0.152517
CCG003814	158.075	270.257	314.333	333.025	398.334
CCG003815	356.238	315.193	217.729	127.22	352.857
CCG003819	1.02778	0.518485	0.0373586	0.0785596	0.861654
CCG003821	726.034	497.046	190.894	70.7122	381.945
CCG003823	2.22916	1.58175	5.09999	6.27303	8.31125
CCG003830	4.24293	5.00671	1.90933	1.39988	4.49956
CCG003831	2.0634	1.93648	0.384246	0	0.104289
CCG003836	48.1071	47.0402	30.0495	14.178	18.3599
CCG003838	23.096	16.0989	7.93872	9.51299	14.291
CCG003839	0.189007	1.28451	0.262719	0.134789	0.198943
CCG003845	31.7784	13.5693	5.91509	13.9956	4.52404
CCG003847	12.712	9.53603	26.0363	32.9198	36.7227
CCG003851	23.5364	14.0175	34.7799	53.6674	77.017
CCG003853	4.1925	6.76976	9.00029	14.156	15.8304
CCG003857	8.86894	4.99169	3.6115	2.90204	10.5664
CCG003860	13.2596	28.414	13.9681	17.0377	9.52811
CCG003861	2.34357	1.85099	0.925615	0.592315	2.06085
CCG003863	5.86464	6.42332	4.30965	2.02994	8.17291
CCG003866	0.625005	2.19635	0.860227	0.634412	1.5822
CCG003867	0	0.785097	0.0227271	0	0.0221588
CCG003873	0.13111	0.100529	0.407269	1.55817	0.169339
CCG003875	49.5049	53.7462	87.0193	78.4963	114.131
CCG003876	26.9711	29.7394	46.3442	40.712	62.5677
CCG003877	72.954	73.2806	59.9874	8.02324	0.260287
CCG003879	1.48009	0.648506	1.11793	0.0821123	0
CCG003881	2.43017	1.50978	0.499423	0	0
CCG003884	24.0413	24.2021	15.6044	0.778486	0
CCG003885	4.40924	3.26308	3.32392	2.43596	1.47854
CCG003888	65.5907	33.9108	115.665	174.514	45.3419
CCG003889	9.20073	7.38328	29.3272	46.9464	35.4789
CCG003890	17.8536	72.6906	100.866	93.3169	191.649
CCG003891	3.65495	3.15162	5.33176	5.19489	9.73442
CCG003892	43.5351	34.2631	8.51337	6.22027	13.9185
CCG003893	36.9632	44.9306	217.26	175.086	47.2019
CCG003896	52.6942	70.5471	82.2996	87.6774	99.1839
CCG003902	892.457	894.527	606.126	300.589	536.609
CCG003906	0.0709056	0.100069	2.14247	0.599815	0.281207
CCG003907	19.9748	18.8716	56.1788	44.191	16.2609
CCG003909	0.125007	4.58805	2.04929	2.0892	2.39669
CCG003910	0.00911419	0.705463	0.313438	0.274815	0.459969
CCG003911	19.6225	7.62211	80.9671	126.961	98.5081
CCG003912	5.24799	2.12202	1.78378	1.96616	2.29127
CCG003913	43.9647	40.5769	28.0936	15.131	30.2462
CCG003914	2.71208	2.00888	0.0989518	0.0881745	0.092945
CCG003915	6.44458	4.90509	1.44598	0.473223	0.784267
CCG003916	21.3385	12.6766	2.88975	3.44456	2.33846
CCG003918	15.7457	10.9902	3.21007	4.1421	17.1661
CCG003919	148.394	136.263	299.25	290.602	170.471
CCG003923	39.5852	47.6189	134.855	124.162	59.176
CCG003925	114.551	70.1986	763.188	876.399	742.806
CCG003926	24.439	13.2142	17.5097	6.1905	2.02207
CCG003929	1515.6	730.101	523.143	350.816	134.716
CCG003932	83.2691	63.2374	18.2893	3.59602	4.23281
CCG003933	128.842	128.729	70.2109	19.8185	19.1138
CCG003934	1.25761	3.38731	29.9791	270.713	154.853
CCG003938	128.224	35.2059	2.33123	19.8012	3.11031
CCG003939	0.0454966	0.0140131	0	0.0207007	0.769828
CCG003940	43.2223	55.7985	87.1415	55.8888	25.1278
CCG003942	0.143034	0.281192	1.11521	0.38875	1.13964
CCG003944	31.7292	47.8772	114.968	91.693	171.438
CCG003945	357.65	380.551	880.06	862.538	1085.82
CCG003946	3.00156	1.33418	1.52751	3.89463	13.4678
CCG003947	4.95101	3.97918	1.63507	2.53731	3.61652
CCG003948	0.816119	0.965714	0.478876	0.183436	0.0721325
CCG003950	2.18554	0.91166	0.616565	0.713014	1.02897
CCG003953	3.18823	3.51367	4.2513	6.65841	6.72576
CCG003955	61.7833	85.4885	24.152	7.71479	9.15463
CCG003957	1.50304	1.39231	1.28002	0.587694	0.0833746
CCG003960	28.6869	36.9173	109.875	108.044	69.3552
CCG003963	3.9091	3.16552	1.64172	2.93953	5.03167
CCG003965	33.8368	23.5918	77.0126	100.383	53.0798
CCG003967	41.7903	58.0878	80.6733	55.0042	49.1589
CCG003974	158.845	704.608	103.785	67.8806	79.0436
CCG003975	0.179913	0.882437	1.7013	0.461203	1.56433
CCG003989	1.77807	1.75409	15.8478	42.152	66.3219
CCG003990	15.8466	8.32731	7.19971	4.69248	23.7594
CCG003991	67.0706	49.2849	96.3313	161.004	41.218
CCG003996	76.9545	40.6142	41.9015	49.0454	32.5011
CCG003997	106.426	132.548	477.545	538.449	249.899
CCG003999	2.26668	1.50997	0.701754	0.792192	3.30141
CCG004000	7.26218	8.15604	2.70212	0.687094	1.44681
CCG004005	2.1243	1.53156	3.85836	5.44504	6.66508
CCG004010	117.337	124.056	107.69	41.5276	71.1515
CCG004011	13.8677	15.9342	36.4059	3.46593	6.58434
CCG004012	28.6593	18.9426	18.4521	11.8605	12.9709
CCG004015	20.2054	7.05783	7.61903	6.95372	2.38171
CCG004017	18.863	19.4995	15.6786	6.9137	9.24076
CCG004019	5.41196	1.38537	6.5019	10.7292	2.73772
CCG004021	0.432592	0.777748	0.729673	0.93144	2.13773
CCG004022	0.0504797	0.931479	0.343016	0.857017	0.87326
CCG004023	1.82574	4.41706	1.58354	0.70574	2.57607
CCG004029	1.494	3.66705	31.6901	28.3909	27.0716
CCG004031	0	0.190661	0.0940127	0.0141794	0
CCG004032	0.820504	0.529221	0.174178	0.0263378	0.0316593
CCG004037	2.45918	14.1632	46.0721	23.1856	70.8529
CCG004038	9.84709	55.6735	258.277	133.971	355.303
CCG004039	77.661	83.7706	159.924	203.51	128.679
CCG004042	15.1132	9.44058	6.78491	5.78776	15.0658
CCG004047	0.187829	0.658013	0.576118	0.289372	1.56714
CCG004051	1.75724	1.73765	1.3326	0.552086	0.140739
CCG004055	7.46432	7.49362	28.1462	28.2982	13.2079
CCG004057	4.68867	11.3193	16.8924	18.4896	41.8223
CCG004058	772.436	334.17	326.525	326.146	143.559
CCG004060	33.7935	26.5236	11.1709	14.996	20.1485
CCG004065	2.63864	2.56992	2.58128	0.898325	1.2394
CCG004066	53.4895	31.8418	6.16823	3.45487	2.04729
CCG004074	6.27498	8.02207	10.1863	10.1672	11.4598
CCG004080	1.07641	0.0995621	0	0.027189	0.149026
CCG004083	11.986	11.6283	6.34587	2.11623	5.31462
CCG004089	0.171833	0.122327	0.0941441	0.00561955	0.0644681
CCG004090	0.234612	0.306038	1.27046	1.62777	4.80916
CCG004092	1.50127	2.76945	6.57701	4.77295	6.77117
CCG004093	0.427098	3.13668	2.78163	1.36116	5.62471
CCG004096	5.36498	5.6627	2.691	1.37052	0.975106
CCG004097	79.2404	66.2876	21.8605	16.0645	15.763
CCG004107	173.646	209.06	105.526	21.7223	29.0175
CCG004108	0.0427874	0.447388	0.240347	0.082257	0.112727
CCG004115	0.322281	1.65501	0.377477	0.45478	0.449149
CCG004116	2.32959	9.41075	2.35411	1.99404	1.79567
CCG004122	3.14988	1.74945	1.20145	0.126751	0.920022
CCG004123	50.6655	14.6104	3.00033	5.4979	20.156
CCG004124	40.9837	192.427	300.399	242.575	362.04
CCG004125	24.5012	70.7783	212.466	238.93	323.09
CCG004126	1.31983	5.38293	9.35699	8.90572	11.6215
CCG004127	10.4734	9.98276	2.33513	0.417191	1.19946
CCG004128	54.6664	84.379	94.163	99.2689	132.083
CCG004129	4.19683	9.45464	10.5156	9.74842	9.31264
CCG004131	403.333	329.903	138.2	51.2355	21.0867
CCG004133	55.3284	42.0244	16.7518	12.4952	17.9347
CCG004136	15.2806	16.6315	7.55317	2.88757	9.33714
CCG004139	0.0130723	2.29148	0.622663	0.0539904	0.0670206
CCG004141	25.5411	26.8178	36.4559	39.0996	57.6818
CCG004142	20.639	16.2794	14.0062	9.02786	5.5743
CCG004147	4.67842	16.4296	16.6541	17.242	17.6161
CCG004150	8.92963	19.3035	30.3976	30.5488	32.5429
CCG004152	0.345142	0.946806	1.21543	0.546735	1.37211
CCG004154	0.0907664	0.229678	0.330724	0.565718	0.671572
CCG004170	12.1703	10.3527	4.61517	5.21351	11.5689
CCG004171	37.3179	50.8147	102.638	254.813	107.175
CCG004172	9.83839	5.67869	0.504859	0.034454	0.494843
CCG004174	4.54311	6.66928	3.20707	0.870203	2.51836
CCG004176	5.82685	7.14266	2.22352	2.27867	2.9728
CCG004177	86.5155	650.283	160.968	128.901	248.77
CCG004178	272.062	276.678	149.959	89.3515	135.043
CCG004179	153.644	137.342	83.0609	58.9741	155.252
CCG004181	77.8732	52.6834	51.5723	42.8068	29.5309
CCG004183	9.27486	6.59576	3.65841	1.71056	8.09504
CCG004186	1.11286	1.41781	1.17266	0.444393	0.101276
CCG004187	117.789	108.265	50.7631	35.1678	55.5408
CCG004193	4.98603	9.34259	9.81192	108.573	31.4709
CCG004197	29.975	22.7468	49.2465	45.2896	55.6782
CCG004199	11.7703	8.5261	7.02417	3.58085	8.56691
CCG004201	5.021	4.46112	2.80543	1.88696	4.06241
CCG004202	23.4445	21.6628	12.0281	8.20584	28.9386
CCG004205	1.63527	0.280783	0.117465	0.182768	0.614099
CCG004206	22.7301	17.1053	9.08908	7.1583	13.0026
CCG004208	4.18732	25.3583	64.345	55.4131	182.896
CCG004211	10.7434	6.83824	19.0129	21.0652	15.7558
CCG004214	16.6485	26.151	4.4014	0.374395	5.62279
CCG004215	13.4948	13.3563	4.84503	1.47465	4.12644
CCG004220	14.0969	29.6799	13.5136	2.67092	5.07173
CCG004224	0.148401	0.985573	7.56744	2.42165	0.754983
CCG004226	4.22823	5.67668	12.4986	9.19996	22.0268
CCG004227	9.96449	3.60965	2.58043	0.966372	1.65778
CCG004236	84.8845	62.8669	35.311	56.4148	53.9544
CCG004240	26.6776	6.6799	3.30787	3.22366	4.46993
CCG004242	18.871	15.9952	6.20844	2.85918	4.20651
CCG004243	137.771	138.678	48.4803	22.126	34.0295
CCG004245	0.0705548	1.14179	4.15363	4.07796	1.18724
CCG004247	0.52343	1.471	0.315961	0.323841	1.36367
CCG004248	5.32166	4.58664	1.96202	0.862965	5.26981
CCG004250	1.03634	3.27086	13.1516	3.16444	2.68642
CCG004256	24.615	192.354	138.748	73.5102	129.735
CCG004259	27.5017	7.8762	82.2878	140.68	30.9229
CCG004260	96.0483	82.446	146.373	214.843	104.794
CCG004265	41.8444	16.7769	5.17048	5.05099	10.4022
CCG004268	91.7415	117.981	179.742	82.1879	13.1584
CCG004270	50.1683	27.5151	68.1654	81.4362	23.0189
CCG004275	257.322	220.675	138.825	123.063	99.235
CCG004276	10.9546	8.06144	5.74839	2.91572	4.90416
CCG004278	32.9769	32.2041	82.2837	144.459	45.8093
CCG004280	23.0143	27.7574	60.8852	45.3253	36.6485
CCG004282	52.3449	48.0474	22.4126	16.2851	26.3988
CCG004284	1.29049	1.13544	0.750145	0.183919	0.355959
CCG004286	1.17838	0.818408	0.300108	0.0871525	0.186889
CCG004288	0.297477	0.22661	0.208482	0.0796203	0.0118243
CCG004295	0.207338	0.273839	1.92303	2.18056	1.1647
CCG004300	1.37363	9.89594	2.39687	1.51603	2.74808
CCG004301	0.0467601	0.976483	10.1577	1.43333	1.62308
CCG004302	40.1302	72.5693	41.531	18.4453	12.8799
CCG004305	8.15868	9.05466	4.52236	0.866445	0.209686
CCG004308	0.0474057	0.438342	0	0.0768571	0.65269
CCG004309	0.382929	0.173445	0.0798053	0.0817747	0.0345022
CCG004321	4.37815	4.34929	5.27784	4.20855	9.49723
CCG004323	42.3527	38.7836	61.8359	82.7091	58.8474
CCG004326	12.2985	11.757	5.54317	3.14902	1.77069
CCG004331	0.0585841	0.965232	0.246352	0.137008	0.379476
CCG004333	0.70661	0.361798	0	0.0532583	0.47497
CCG004341	9.20367	8.56938	7.54509	5.29673	4.14123
CCG004342	574.238	626.331	327.969	109.014	335.211
CCG004344	3.11902	3.79069	3.88625	0.991756	0.223614
CCG004345	3.5385	2.93664	2.95342	1.81398	0.0839402
CCG004346	0.951658	5.32426	3.63046	2.8585	1.4399
CCG004356	4.31789	3.54391	1.33463	0.467194	2.22019
CCG004357	8.18122	7.0938	39.8123	53.1376	32.0715
CCG004358	4.58247	7.91352	175.86	229.468	79.589
CCG004360	7.7268	4.31978	37.1962	34.4628	50.062
CCG004361	0.578383	2.25544	7.07265	9.82886	18.9739
CCG004364	225.835	100.422	11.1944	4.89494	2.04559
CCG004366	13.6167	9.70771	3.11944	1.1324	9.8347
CCG004369	85.3902	85.067	127.007	155.008	127.216
CCG004370	45.5016	46.6799	33.1003	12.1407	12.2799
CCG004375	10.1409	6.70967	1.47503	0.18261	0.911964
CCG004384	66.6979	67.578	42.4896	24.3502	23.7357
CCG004385	1.49128	4.737	0.860381	0.347477	0.259972
CCG004388	7.09441	9.13185	14.9913	15.4033	16.5747
CCG004391	27.0898	25.9716	6.18549	2.75177	9.63406
CCG004402	8.89817	6.89139	3.86919	0.263715	1.57114
CCG004406	78.8433	87.4257	81.6364	87.9879	34.3348
CCG004407	7.75076	8.26167	2.13673	0.777792	2.48322
CCG004408	6.83752	5.19989	1.81185	2.87839	6.14044
CCG004409	629.957	592.008	330.458	196.318	440.149
CCG004412	2.312	2.29775	5.79629	16.773	3.58672
CCG004414	29.9658	20.7478	15.5308	5.50327	5.71222
CCG004417	0.922219	0	0	0.0680613	0
CCG004421	28.0611	27.2736	22.5505	7.40485	13.7206
CCG004427	8.41802	7.84389	3.95647	2.96815	2.37969
CCG004429	1.96426	1.86561	0.739714	1.09843	0.970276
CCG004430	5.33897	6.09351	2.57099	1.54701	0.819772
CCG004431	65.1671	61.0628	35.6811	29.8714	23.7464
CCG004434	12.9757	6.82458	10.6283	4.13173	2.49783
CCG004436	267.298	265.303	258.548	140.411	43.5563
CCG004437	46.6318	88.1359	378.117	135.451	57.6098
CCG004439	3.93673	5.13527	8.88323	3.18187	18.8975
CCG004441	4.63928	4.15867	0.792546	0.203166	0.0988073
CCG004447	0.2676	0.21964	0.367238	0.488755	3.92966
CCG004448	2.77486	1.10413	1.34615	0.290718	0.318338
CCG004451	11.2389	10.6327	3.95261	1.78654	4.8664
CCG004452	0.425509	0.330229	0.424196	0.190384	0.0373256
CCG004456	324.629	330.013	226.104	33.0038	87.6223
CCG004457	5.35663	6.54964	10.2495	2.88737	2.87477
CCG004458	5.83933	4.17619	1.76925	1.94211	2.81382
CCG004460	0.662455	1.84528	0.55996	0.215593	0.198694
CCG004462	12.0632	11.7876	30.2556	34.1818	29.7788
CCG004464	8.97612	18.8347	19.5019	13.1495	34.0657
CCG004465	0.2049	0.0805147	2.19792	5.70781	1.12624
CCG004468	0.0964541	0.212016	1.20693	0.796074	0.297878
CCG004472	0	0.04809	1.5008	2.46106	1.47944
CCG004475	0.0673113	0.385637	3.03557	3.68349	1.84268
CCG004476	0	0	0.442803	0.4753	0.163099
CCG004482	108.192	95.9154	72.3228	61.5265	26.6417
CCG004487	18.6205	18.0596	11.5396	6.77761	16.0602
CCG004494	24.824	52.6899	56.0406	75.4978	63.9164
CCG004495	16.1839	16.509	26.0979	27.4497	24.3935
CCG004499	29.5808	31.8897	14.75	9.9845	9.734
CCG004502	14.8547	15.3334	16.2506	6.9763	6.25121
CCG004503	3.34125	2.39427	2.92428	2.04032	9.59076
CCG004505	12.5957	12.7494	8.00654	4.37864	9.67925
CCG004508	17.2112	12.9411	12.6878	8.35331	6.13666
CCG004509	263.655	208.13	215.981	149.776	103.637
CCG004510	0.806054	0.84416	0.219961	0.273547	0.13578
CCG004511	97.8278	64.4724	9.93686	0.627951	1.52181
CCG004515	9.07309	5.61248	14.0864	11.1106	24.3528
CCG004519	289.019	302.795	365.151	553.017	401.491
CCG004523	8.49815	11.6572	5.84025	2.23502	5.04296
CCG004524	49.857	28.2631	4.40055	1.24828	1.85555
CCG004525	2.48338	2.98754	1.25121	0.765512	0.539642
CCG004526	0.467573	1.59681	0.507779	0.231172	0.65587
CCG004527	86.7752	74.1939	25.2765	11.3185	14.431
CCG004528	8.92233	14.4093	2.38963	2.39738	1.68032
CCG004529	417.305	429.87	198.05	41.2946	71.2533
CCG004530	57.9056	102.385	208.134	246.031	149.228
CCG004534	16.8107	41.4019	47.1382	44.5317	83.4974
CCG004535	1.44852	6.51471	4.25055	1.57118	2.83282
CCG004538	4.17683	5.42311	4.84599	17.1358	14.0945
CCG004539	1.56286	2.92815	2.12129	8.47404	6.74276
CCG004540	4.81368	4.91954	3.18623	7.52935	8.33697
CCG004541	132.08	151.358	252.635	470.723	220.443
CCG004542	210.518	217.093	105.281	22.3679	100.315
CCG004544	9.00588	11.1454	13.7768	33.5996	12.6187
CCG004545	24.747	69.6934	43.9219	28.6029	34.3455
CCG004546	24.6073	19.3108	8.24824	10.4544	26.5219
CCG004547	9.20793	14.9955	19.3841	11.1645	19.4582
CCG004549	19.8642	17.9584	5.89815	1.42313	4.61226
CCG004553	18.0834	42.8755	17.6073	10.8293	18.5638
CCG004555	40.4017	37.6787	19.4286	11.5576	55.5595
CCG004557	6.32459	10.2248	10.0362	9.22674	32.6147
CCG004558	11.9813	12.4658	7.25207	2.46831	11.7092
CCG004559	23.5084	34.1497	19.5457	4.42795	12.3892
CCG004560	62.3674	63.4463	89.8435	118.46	168.666
CCG004561	17.0008	6.31463	8.64412	14.1381	8.40144
CCG004566	7.78081	13.7669	13.4606	18.2626	5.93797
CCG004571	3.03009	1.3613	2.17059	1.19785	0.200238
CCG004574	1.11116	0.343174	0.172763	0.14678	0.145764
CCG004576	3.34484	4.72242	6.04678	7.34488	3.35604
CCG004578	1.379	0.588712	0.266942	0.414416	0.456969
CCG004579	4.15361	5.97124	7.43647	8.34143	4.18987
CCG004580	1.61889	2.66084	2.791	4.01674	2.08229
CCG004581	5.31267	2.52959	1.74657	0.726313	0.296884
CCG004582	1.33901	0.410804	0.370992	0.177612	0.371044
CCG004583	3.49353	1.35896	1.09767	0.691372	0.557595
CCG004585	1.37593	2.1663	1.49762	0.283873	0.188746
CCG004587	1.12565	0.670678	0.772999	0.894735	0.36485
CCG004590	40.4784	179.265	230.133	200.218	278.655
CCG004592	187.128	136.56	61.5506	42.8621	129.644
CCG004594	0.220662	1.07255	0.339426	0.292599	1.37726
CCG004596	9.75765	9.3659	10.2844	2.63104	3.21916
CCG004598	5.96867	6.17905	4.17184	1.9558	3.7311
CCG004600	7.09787	22.2386	20.7176	28.6505	46.4453
CCG004601	495.77	464.966	317.861	186.294	481.812
CCG004611	0.390548	0.972168	1.70193	0.643103	0.954398
CCG004617	2.12552	1.88183	4.25808	2.94769	1.94884
CCG004618	39.0688	43.948	91.8378	83.8143	46.5925
CCG004620	23.4856	19.5839	6.33498	1.71913	2.471
CCG004623	48.8133	57.305	31.286	22.5936	11.8578
CCG004624	32.9423	44.7842	65.9879	52.9631	72.5452
CCG004627	32.0028	32.9014	22.1892	9.8947	15.9007
CCG004630	14.6696	13.7723	6.48214	4.47839	7.95275
CCG004631	143.654	109.377	49.8792	15.9259	10.8205
CCG004632	28.303	27.1608	10.6248	5.96809	24.4198
CCG004636	22.7602	9.28073	5.93921	8.2185	10.8373
CCG004639	104.938	285.269	588.183	659.149	526.38
CCG004642	61.3164	64.0536	53.2696	50.462	120.771
CCG004643	4.19852	4.26559	8.11276	7.58607	11.1036
CCG004647	47.0819	44.3619	19.03	21.4675	28.1053
CCG004650	5.19106	5.54351	1.63684	0.437512	0.474017
CCG004652	70.6109	55.6118	36.3305	23.8103	31.0949
CCG004653	0.228493	1.72754	0.245107	0.0638624	0
CCG004655	61.2081	120.537	152.872	141.558	101.233
CCG004662	85.1925	130.188	203.022	165.932	250.06
CCG004664	43.4779	83.3708	87.6738	85.4652	174.406
CCG004665	96.1083	100.003	53.1637	30.9775	57.0806
CCG004667	0.116219	1.46612	0.601189	1.70961	0.317786
CCG004668	0.03198	1.12653	0.341129	1.07856	0.491573
CCG004670	19.6986	19.2794	25.6851	31.612	20.9962
CCG004673	31.3093	28.7464	22.8848	11.1149	38.6268
CCG004677	25.089	37.6878	54.7862	47.7485	33.1442
CCG004679	16.1161	11.4496	26.0946	43.0425	18.5336
CCG004689	0.531516	0.232373	1.1213	2.04802	0.779226
CCG004693	21.3653	27.3427	6.93962	10.1627	28.7431
CCG004694	14.9872	8.03901	1.37814	0.988481	8.42991
CCG004697	9.72067	7.10944	1.34338	1.08364	5.24097
CCG004698	9.6901	7.81889	2.05278	0.543187	1.87937
CCG004699	11.4971	9.437	6.23489	4.03471	7.13649
CCG004701	0.479765	0.571795	1.89165	1.12612	1.41164
CCG004703	0.438345	3.93525	0.696749	0.285449	0.928579
CCG004704	8.77383	3.84324	2.1459	1.73748	4.15648
CCG004706	3.88139	4.34883	7.0681	3.96812	7.34952
CCG004708	114.781	143.832	193.533	207.241	143.27
CCG004710	69.4498	27.2915	91.9908	224.685	212.062
CCG004712	12.4601	146.158	90.5597	121.637	217.936
CCG004713	13.1608	4.10858	5.60379	2.81515	0.876199
CCG004715	15.8467	7.72739	2.88512	3.99079	8.36015
CCG004716	148.579	60.8614	146.988	183.023	86.0839
CCG004720	84.5119	80.016	49.0977	24.8496	36.9274
CCG004723	51.7738	272.189	277.257	498.692	534.438
CCG004727	19.7932	19.5221	27.1977	35.4951	44.9082
CCG004730	5.47388	4.70523	1.10714	0.261793	0.673462
CCG004733	11.6911	11.6545	9.80192	2.08365	1.16451
CCG004737	159.324	184.356	76.0899	39.337	72.3041
CCG004738	10.1923	7.56771	4.43036	3.70202	7.27416
CCG004740	4.81644	2.61432	3.11514	8.06072	12.3723
CCG004741	1.91919	1.75836	1.38892	0.60237	1.7179
CCG004742	3.35904	2.13837	1.38524	1.12848	3.97607
CCG004743	46.9596	16.1255	2.13646	3.22993	6.01104
CCG004744	8.93721	7.35189	5.14028	4.17202	3.6166
CCG004745	0.846238	0.557549	0.106218	0	0.0762867
CCG004746	8.02946	5.63287	0.433135	0.32347	0.934211
CCG004748	28.6325	30.3031	127.328	189.212	44.3793
CCG004749	44.2782	41.8481	21.3026	19.4964	16.1218
CCG004751	4.01361	4.22007	22.1839	18.4659	33.7644
CCG004752	22.2359	14.7017	7.9374	12.1303	22.377
CCG004754	56.9409	66.03	113.388	117.288	121.561
CCG004755	25.703	181.992	94.2683	70.1696	128.093
CCG004756	8.29664	29.8799	10.4462	7.53095	10.9172
CCG004757	19.9452	19.5891	10.8591	37.8645	5.0962
CCG004758	16.8557	12.9022	7.44466	9.52474	33.0088
CCG004761	13.3452	21.1135	22.4268	27.8823	33.4346
CCG004770	20.3548	33.6098	48.668	23.5896	29.6259
CCG004774	1.51175	0.294626	0.0439946	0	0.0298197
CCG004776	0.0172875	0.0339864	0.1623	0.0733844	0.309928
CCG004777	2.20342	2.47497	8.69585	10.8185	19.6484
CCG004786	2.68977	2.7342	1.11381	0.569861	1.46111
CCG004787	13.7214	9.18387	1.84446	1.68102	6.25529
CCG004788	2.26776	1.89772	0.512781	0.424245	1.1254
CCG004791	2.86598	6.33097	3.69757	3.49915	4.76072
CCG004797	47.5127	22.5287	6.13284	7.45863	5.32005
CCG004801	0.448554	0.317965	4.30348	0.49977	0.760699
CCG004805	37.9453	19.5674	4.11496	0.828532	1.06998
CCG004808	8.04245	7.49963	4.44832	1.76597	6.5511
CCG004809	4.50402	4.49536	1.28517	0.621095	3.87665
CCG004810	0.871273	1.22676	0.335967	0	0.0694574
CCG004818	13.5906	11.9634	2.05572	0.958637	1.2033
CCG004819	19.9755	18.0828	10.6915	6.53489	11.2057
CCG004821	2.67338	1.58236	1.06151	1.18334	1.4735
CCG004823	244.965	234.815	132.266	62.1021	184.877
CCG004825	135.548	334.203	144.025	68.5543	178.048
CCG004826	11.7092	13.8716	22.9788	22.5228	37.6716
CCG004827	66.8157	38.1624	25.0804	46.2582	17.3098
CCG004828	21.1049	451.459	149.126	218.775	251.856
CCG004830	13.2699	10.2083	4.3225	2.25215	7.19442
CCG004831	2.62203	3.44821	1.02563	0.0802326	0.231491
CCG004834	4.58007	4.80297	7.69983	8.06552	4.04661
CCG004835	0.105851	0.660074	0.576656	0.197752	0.594477
CCG004836	16.2279	11.5353	8.7541	6.66933	6.01284
CCG004837	19.6922	16.8644	6.12873	3.42037	2.0389
CCG004840	69.886	179.181	429.688	558.964	303.996
CCG004841	3.23226	4.79012	5.92871	3.6022	2.89582
CCG004842	96.5971	153.635	198.882	134.545	100.12
CCG004843	7.50507	2.4433	0.444381	1.36994	1.69775
CCG004844	1.5538	2.22312	5.61633	1.2986	2.49485
CCG004848	0.0242482	0.0680815	0.300049	0.512679	2.59658
CCG004860	47.939	122.436	309.092	253.812	116.21
CCG004861	70.8134	72.0581	12.1778	2.97787	1.79815
CCG004862	5.10068	6.21219	8.32622	16.8659	16.988
CCG004864	8.32076	4.95877	1.12676	0.102565	1.64865
CCG004867	4.33589	3.76041	6.68202	16.4796	11.9319
CCG004868	1.73106	3.46108	41.9556	47.2085	62.471
CCG004869	2.7807	3.25411	2.4969	0.529066	1.39861
CCG004872	26.1184	25.5932	33.2075	48.8473	21.435
CCG004873	13.992	8.87432	11.7818	10.8647	5.51986
CCG004874	18.2852	17.4367	31.9765	49.3591	21.5849
CCG004875	6.04458	6.38701	10.2871	10.7467	10.8031
CCG004876	1.05322	0.738739	0.325791	0.284123	0.0593182
CCG004877	2.13695	2.65873	2.5728	0.440726	0.147605
CCG004882	0.0799052	1.75974	0.896337	0.189257	0.737512
CCG004886	44.7792	37.9566	14.2782	8.80456	15.368
CCG004892	149.426	127.333	61.8565	33.5957	34.8734
CCG004896	14.3863	19.5471	31.8009	10.043	8.15281
CCG004898	11.5335	10.7646	16.2333	7.5633	3.95668
CCG004899	41.9941	44.6299	64.672	65.7693	58.4704
CCG004901	43.7919	36.2276	15.6005	9.99429	17.5703
CCG004902	37.0258	19.9715	9.53396	6.99715	8.44441
CCG004904	24.708	22.3294	11.2502	9.59195	10.3948
CCG004905	6.73626	5.17181	3.20053	0.279687	0.895709
CCG004907	0.556205	0.284534	0.703037	1.2405	0.313343
CCG004908	7.12154	3.80775	2.22959	2.53664	2.55872
CCG004909	35.2368	41.3998	13.6691	4.71662	5.97398
CCG004910	3.20549	1.06139	2.24919	2.05743	4.67478
CCG004914	4.66805	2.86631	6.82174	4.84243	9.94651
CCG004917	9.71282	6.96882	2.23476	1.50537	4.25036
CCG004918	56.3759	49.1577	155.486	280.36	120.05
CCG004919	3.68193	2.77118	1.95166	0.387349	1.15034
CCG004921	145.811	242.212	167.477	226.977	313.227
CCG004924	83.77	45.946	9.84755	0.569613	1.62809
CCG004925	5.16343	3.64691	6.00788	1.33832	3.61971
CCG004928	21.8632	22.0298	11.5727	4.26693	10.1379
CCG004929	14.014	3.59156	1.58755	2.23104	2.14866
CCG004930	52.2785	129.719	41.2817	10.1935	31.9621
CCG004931	26.0185	12.5217	86.3051	118.63	50.6468
CCG004933	13.4648	13.5475	2.84798	0.481161	0.723936
CCG004934	21.3499	20.5307	4.53927	1.07441	1.81928
CCG004935	5.07159	6.75234	6.36244	2.32631	1.74362
CCG004936	33.7821	35.2721	35.4897	29.8084	63.9423
CCG004937	12.7573	131.554	188.657	215.636	689.299
CCG004938	2.78159	7.69341	7.47246	8.81302	23.8917
CCG004941	0.230009	0.402881	0.297016	0.596935	0.666652
CCG004942	1.60681	0.735854	0.130051	0.116788	0.0305391
CCG004943	0.196469	0.345464	1.43537	1.23799	6.6265
CCG004947	0.422545	3.57522	0.275874	0.189932	0.161521
CCG004952	0.471213	1.54893	0.227636	0	0
CCG004958	0.792176	2.14603	1.91927	2.98438	1.11596
CCG004960	0.554628	0.867222	0.444066	0.0961192	0.121987
CCG004967	7.1815	7.55466	9.88936	14.066	8.55272
CCG004969	6.77483	4.11092	2.5449	2.40408	3.28424
CCG004973	13.1045	9.83784	5.56775	3.2205	2.17805
CCG004975	12.7722	12.85	78.081	72.1704	33.2437
CCG004976	16.7744	19.2367	35.7613	33.5618	20.9114
CCG004986	2.14939	2.16054	1.46786	0.655452	0.563557
CCG004991	608.102	613.08	322.71	59.4977	26.9345
CCG004993	222.716	466.388	246.283	98.9836	192.856
CCG004995	12.8733	10.2324	4.89309	3.81632	5.02546
CCG004996	31.5251	55.2777	52.8141	52.9754	76.9468
CCG004999	90.7897	32.521	30.3406	32.6789	27.9025
CCG005001	9.91263	24.3958	12.6415	12.3611	18.3426
CCG005002	15.7816	19.4145	25.2556	25.0949	35.6959
CCG005004	50.5518	50.5853	16.4925	9.15045	14.461
CCG005008	64.6248	63.7326	38.1974	25.0359	35.219
CCG005012	7.19682	16.2227	31.9772	4.82386	8.34316
CCG005013	4.48394	4.73014	14.0768	23.0634	6.20524
CCG005014	64.5428	314.574	295.548	159.04	287.641
CCG005015	7.96222	6.85447	2.13918	0.281815	0.677852
CCG005016	2.51529	9.20983	24.2109	34.2979	14.886
CCG005018	0.745408	7.59049	2.56301	1.51252	2.98192
CCG005023	17.9465	17.6564	9.88528	6.04935	6.06208
CCG005024	19.2314	24.8824	19.9371	23.0298	36.6343
CCG005025	1.37888	2.75782	1.46904	2.10115	2.68339
CCG005026	424.529	792.204	1217.43	641.558	447.656
CCG005028	47.3222	48.0252	43.4321	33.6629	14.7886
CCG005029	11.2136	9.57966	6.68061	1.38553	1.5599
CCG005030	28.1778	18.7316	6.23048	7.76227	17.3749
CCG005031	9.46273	7.16174	1.96058	1.05566	6.51339
CCG005032	9.44994	7.35292	4.58443	11.6672	24.0955
CCG005033	140.085	114.356	37.7204	27.8919	132.259
CCG005035	4.7806	4.63324	5.54348	1.55731	1.45932
CCG005036	2.19976	4.31321	6.31086	1.42235	1.84876
CCG005037	246.274	340.577	484.385	485.621	395.977
CCG005040	5.90127	3.85447	1.30562	1.40099	4.47853
CCG005043	17.2797	17.8926	14.0323	5.75873	7.78585
CCG005044	4.15563	2.59678	3.19719	2.22529	1.39936
CCG005045	139.677	73.745	27.582	10.5332	2.98299
CCG005046	0.377855	5.23983	32.6748	0.223389	0.426204
CCG005047	3.7608	3.20359	0.53205	0.0457241	0.0159831
CCG005051	5.97466	5.51593	10.8307	10.3177	7.26877
CCG005052	0.0360387	0.0371968	3.85046	37.8795	16.36
CCG005058	0.0522125	1.68966	0.961734	0.92028	2.13983
CCG005063	8.6674	12.0876	3.62655	3.62164	4.13806
CCG005065	3.62032	1.08081	1.96863	0.470824	0.52377
CCG005067	4.22462	8.96191	7.10082	12.7083	19.3782
CCG005072	346.13	122.965	228.298	311.798	60.2105
CCG005073	1.21529	6.48734	7.96257	5.17359	5.68743
CCG005084	7.46078	7.38077	1.50954	1.90554	1.42516
CCG005087	76.5412	119.196	255.245	214.779	184.644
CCG005089	0.545341	0.723075	2.03929	8.48887	12.2993
CCG005090	1.62338	4.47776	1.60912	0.770838	2.49914
CCG005091	4.94261	7.18868	4.26021	1.86046	6.49228
CCG005092	20.7552	63.9261	60.9641	63.9769	70.3225
CCG005095	62.8317	61.178	73.0914	99.953	53.5509
CCG005096	7.90338	5.26118	38.6246	39.4432	52.4796
CCG005099	3.31708	4.175	2.76761	0.836995	1.20555
CCG005101	9.99349	9.06967	14.5759	23.6572	11.553
CCG005106	4.71349	3.55605	1.17509	1.58559	4.08012
CCG005112	38.7466	30.6895	20.9312	9.61983	13.704
CCG005116	201.562	198.314	115.523	64.9825	158.207
CCG005117	5.17398	12.103	30.3776	0.85216	1.70555
CCG005121	1.91366	1.88974	4.39092	3.01566	4.90358
CCG005125	22.9722	19.4812	6.36113	2.63208	8.59056
CCG005128	0.176307	0.398118	2.12589	2.795	2.95686
CCG005129	49.0713	38.7722	38.7524	26.6829	17.3881
CCG005130	72.3946	101.212	10.4848	0.538387	0.482439
CCG005133	24.9323	16.7397	6.97722	9.56286	14.8157
CCG005135	9.15477	6.81841	2.67604	3.3235	18.7176
CCG005139	6.21878	9.53248	30.5474	9.75997	6.72067
CCG005141	27.7996	17.7772	2.47302	0.216699	1.2419
CCG005142	17.4913	12.4129	6.99691	7.90738	9.53927
CCG005147	3.14228	2.09922	0.809604	1.35607	1.15434
CCG005148	8.35037	7.73271	5.05392	2.54107	3.85812
CCG005149	112.63	129.551	224.304	254.252	169.817
CCG005151	6.8653	6.77654	3.29894	1.56187	2.81849
CCG005152	65.4534	17.4198	13.3709	2.99517	2.39557
CCG005153	105.825	147.199	1083.75	1043.01	325.612
CCG005154	53.2441	66.752	406.694	323.473	216.928
CCG005157	0.516376	0.347321	9.1131	0.708181	0.329687
CCG005159	18.9149	15.0683	3.11098	2.33101	2.49659
CCG005160	9.45346	11.4166	24.1948	22.8147	11.3231
CCG005161	30.9258	26.7176	15.2911	10.0309	15.1251
CCG005163	3.95376	8.96896	9.02819	13.3483	14.8327
CCG005166	16.4377	9.98572	1.55416	0.250521	0.82509
CCG005172	141.856	126.809	396.689	295.714	75.934
CCG005173	30.1274	27.3376	12.3892	13.481	8.88751
CCG005175	121.804	99.9635	50.3603	13.7901	25.3712
CCG005177	1.45331	0.246897	0	0	0.0445304
CCG005178	2.72851	3.52034	1.60397	0.473313	1.3868
CCG005179	58.0174	80.0712	59.0991	31.4448	21.49
CCG005181	20.1298	20.6648	36.8414	27.9038	18.3374
CCG005182	14.6439	47.5816	82.9417	72.3704	86.471
CCG005194	7.59725	7.98001	18.6555	16.0006	9.76925
CCG005209	6.85036	2.21379	15.531	22.8488	52.7334
CCG005218	0.0345188	0	0.235923	1.56583	0.333329
CCG005219	1.30518	0.81756	0.253203	0.312386	0.452599
CCG005220	14.5316	12.4428	3.22803	1.58549	2.34123
CCG005222	6.06359	30.4651	3.92572	1.7686	2.25797
CCG005226	7.48206	5.47009	6.852	9.57239	14.1823
CCG005227	169.65	29.5892	36.6059	31.1623	57.1332
CCG005228	27.6442	16.1976	3.43246	0.905033	4.08956
CCG005229	59.9915	33.7055	14.9009	4.42092	3.47304
CCG005230	849.874	391.399	86.6191	5.5534	1.13883
CCG005232	47.4781	30.0567	124.974	101.062	71.5849
CCG005241	1.47477	2.02799	6.68289	6.47692	8.62517
CCG005243	17.0111	11.5933	2.28274	0.909469	4.22922
CCG005245	21.3027	22.1514	16.2	7.99202	4.23318
CCG005258	27.705	14.9845	12.5892	11.3217	10.1776
CCG005260	1.93847	3.63105	3.87304	2.32124	3.02159
CCG005262	18.8852	11.5976	1.43755	0.630471	2.00629
CCG005263	16.4539	16.7718	7.88085	4.60975	18.1555
CCG005265	865.136	833.906	569.525	327.33	758.396
CCG005268	30.0043	23.2093	11.2337	6.21934	4.14777
CCG005269	21.6167	19.0132	13.7618	2.15375	3.9758
CCG005270	6.27265	3.01038	2.47466	9.40567	8.57111
CCG005274	151.511	118.986	79.8967	56.2966	131.976
CCG005276	0.510557	0.518144	0.340358	0.0194303	0.157316
CCG005277	2.36008	2.78079	3.71211	5.85808	4.45092
CCG005278	13.0756	10.9411	13.4072	21.0385	15.329
CCG005280	8.46525	6.91868	13.5917	17.0099	11.8221
CCG005281	81.213	72.4577	157.372	67.0985	84.7334
CCG005283	0.678427	1.70382	2.44799	2.80591	2.44538
CCG005285	104.361	109.858	110.6	60.3595	41.9055
CCG005287	28.3547	17.7983	7.76298	14.1827	11.5281
CCG005290	19.382	26.8425	77.9424	118.809	58.1629
CCG005291	12.5023	11.1931	6.22806	3.29584	7.54956
CCG005292	17.4826	13.7216	4.00192	2.97952	9.63726
CCG005293	4.05399	2.54889	1.27893	0.248956	0.995201
CCG005294	201.129	373.664	1169.87	3159.8	4024.63
CCG005295	37.3122	33.9592	167.523	320.821	182.114
CCG005296	12.6247	15.0757	19.0961	19.2658	25.9731
CCG005297	55.6726	55.4104	27.6082	20.2587	42.0894
CCG005299	17.6871	19.4597	11.9243	2.36119	13.1343
CCG005302	0.491578	0.739625	1.20832	3.00832	1.03131
CCG005304	108.034	58.294	238.911	248.385	72.9955
CCG005306	100.92	98.5589	134.484	219.812	220.015
CCG005310	4.74586	4.85772	1.34908	0.62469	1.58223
CCG005315	18.6012	14.0937	18.8954	44.9336	27.59
CCG005320	4.32483	8.42845	32.1017	79.9402	61.4215
CCG005322	7.73805	7.10404	13.3723	20.167	26.2538
CCG005324	0.960967	1.9518	1.30951	2.31645	2.22777
CCG005339	1.93833	1.91877	1.00829	0.645942	1.74283
CCG005341	26.0939	23.5797	3.3199	4.03974	4.69404
CCG005343	12.8679	12.7228	13.8446	10.2894	3.52538
CCG005344	6.70475	6.41309	8.93991	5.40495	2.02929
CCG005347	31.807	31.3265	26.1025	26.7972	14.4819
CCG005349	3.68003	2.61765	1.05037	0.333718	2.07933
CCG005351	4.25715	5.11238	15.4613	5.17508	5.84935
CCG005355	5.13872	7.84976	6.60723	4.26935	23.7555
CCG005357	24.1285	18.1349	24.2096	24.4637	76.7174
CCG005360	54.7696	76.2878	111.494	73.1574	82.283
CCG005361	54.7756	51.6449	141.769	118.698	34.1391
CCG005362	4.06463	6.35536	7.98752	3.40102	2.36796
CCG005365	12.2127	18.4847	16.7948	12.8493	23.9588
CCG005366	12.0147	10.8037	9.29792	2.24345	4.90243
CCG005368	70.6909	70.42	53.6036	5.33931	1.04208
CCG005370	5.12618	3.49525	6.48302	8.85912	7.26265
CCG005372	49.8628	45.9415	67.2524	62.8207	93.6822
[truncated: 8,740 more rows]
