# Supplementary material for: Transcriptome and structure analysis in root of Casuarina equisetifolia under NaCl treatment
Source: PeerJ. 2021 Sep 22;9:e12133. doi: 10.7717/peerj.12133 (PMC8464194; doi:10.7717/peerj.12133)
Supplement: Supplemental Information 8 [file peerj-09-12133-s008.xlsx]

## Sheet: Sheet1
Table S6 The DEGs encoding TFs under salt stress in C. equisetifolia
ID	Control	Hour1	Hour6	Hour24	Hour168	Family	Best hit in A. thaliana	Blast e-value	Description for the best hit
CCG002493	87.5924	140.365	354.399	312.852	115.997	AP2	AT5G10510.3	1e-160	AINTEGUMENTA-like 6
CCG000209	1.5379	0.760996	0.237038	0.170216	0.420006	AP2	AT3G54320.3	4e-89	AP2 family protein
CCG004698	9.6901	7.81889	2.05278	0.543187	1.87937	AP2	AT1G72570.1	1e-131	AP2 family protein
CCG008872	9.76608	7.47629	5.35718	2.93608	3.26059	AP2	AT3G54320.3	1e-123	AP2 family protein
CCG011941	13.4302	4.89946	0.965541	1.47915	4.06007	AP2	AT4G37750.1	1e-137	AP2 family protein
CCG020304	131.557	59.9231	35.6652	63.4281	55.3459	AP2	AT4G36920.1	1e-139	AP2 family protein
CCG025555	22.8954	19.8217	16.7402	10.7843	6.05803	AP2	AT1G51190.1	0	AP2 family protein
CCG028531	18.2733	20.0133	10.8299	7.15715	7.43768	AP2	AT2G41710.1	1e-161	AP2 family protein
CCG019703	38.0637	14.459	43.5965	111.439	145.488	AP2	AT2G28550.3	5e-98	related to AP2.7
CCG029565	23.1141	22.4531	14.3175	8.85623	12.8784	ARF	AT1G59750.1	1e-157	auxin response factor 1
CCG001487	72.8801	55.8767	24.045	17.5961	23.9858	ARF	AT2G28350.1	0	auxin response factor 10
CCG005937	7.06449	10.4791	1.99595	0.480661	2.65813	ARF	AT4G30080.1	0	auxin response factor 16
CCG011825	4.30417	3.65703	2.1544	1.11429	4.03045	ARF	AT1G77850.1	1e-172	auxin response factor 17
CCG007085	75.0747	61.7657	19.0248	10.4791	20.3303	ARF	AT3G61830.1	0	auxin response factor 18
CCG003892	43.5351	34.2631	8.51337	6.22027	13.9185	ARF	AT5G60450.1	0	auxin response factor 4
CCG015429	17.8484	14.2053	7.57899	9.74572	18.1626	ARR-B	AT1G67710.1	1e-135	response regulator 11
CCG016027	76.2087	50.9309	30.3024	27.4929	37.6533	ARR-B	AT2G25180.1	1e-132	response regulator 12
CCG021149	18.4877	32.0433	46.9505	16.3699	7.66983	ARR-B	AT2G25180.1	1e-120	response regulator 12
CCG000515	3.32336	3.18394	0.593955	0.0891805	0.358123	B3	AT3G19184.1	5e-38	B3 family protein
CCG002043	7.96735	10.361	4.61568	0.878919	3.18204	B3	AT3G19184.1	3e-83	B3 family protein
CCG004458	5.83933	4.17619	1.76925	1.94211	2.81382	B3	AT5G66980.1	4e-32	B3 family protein
CCG009106	2.22651	2.23568	1.15583	0.220285	2.26968	B3	AT5G66980.1	1e-31	B3 family protein
CCG013315	13.9937	5.10132	11.4514	15.2315	9.36587	B3	AT2G46870.1	4e-76	B3 family protein
CCG013961	6.02726	4.87868	2.21501	2.40049	4.04635	B3	AT5G66980.1	1e-20	B3 family protein
CCG015285	16.9448	15.9124	14.7605	33.7189	11.187	B3	AT3G18990.1	1e-11	B3 family protein
CCG018526	8.43303	4.97142	6.46833	2.67758	3.9829	B3	AT5G06250.2	4e-71	B3 family protein
CCG027043	14.9643	12.3987	6.34942	5.94637	5.73033	B3	AT3G18990.1	1e-127	B3 family protein
CCG009308	27.5864	21.2591	18.5608	10.2507	20.1514	B3	AT2G30470.1	0	high-level expression of sugar-inducible gene 2
CCG024789	10.5131	9.91019	19.3849	20.0872	21.0127	B3	AT4G32010.1	0	HSI2-like 1
CCG010613	26.6802	26.5027	22.523	10.4828	11.4873	BBR-BPC	AT2G35550.3	1e-61	basic pentacysteine 7
CCG007576	36.921	60.2306	52.4212	46.4703	16.2019	BES1	AT1G75080.2	1e-146	BES1 family protein
CCG009248	0.0153746	1.04328	0.333872	0.0874352	0.341427	BES1	AT2G45880.1	8e-24	beta-amylase 7
CCG029257	0.27804	0.233697	0.101806	0	0.112887	bHLH	AT5G01310.1	1e-32	APRATAXIN-like
CCG011317	354.425	254.418	70.6249	83.3484	11.3946	bHLH	AT3G47710.1	3e-36	BANQUO 3
CCG027390	46.0057	51.4985	102.121	77.7717	90.9379	bHLH	AT1G69010.1	1e-115	BES1-interacting Myc-like protein 2
CCG001723	200.118	104.498	70.0991	44.9375	39.42	bHLH	AT5G65640.1	3e-82	beta HLH protein 93
CCG027250	159.844	20.5993	8.31684	13.4646	8.48183	bHLH	AT5G65640.1	2e-72	beta HLH protein 93
CCG000225	2.55855	2.96286	1.88454	0.263152	1.31998	bHLH	AT3G28857.1	3e-39	bHLH family protein
CCG000934	25.4304	14.5508	3.70516	2.44125	6.05877	bHLH	AT1G27660.1	3e-36	bHLH family protein
CCG003618	49.7242	53.099	9.38874	8.2303	14.388	bHLH	AT3G07340.1	1e-123	bHLH family protein
CCG003866	0.625005	2.19635	0.860227	0.634412	1.5822	bHLH	AT1G30670.1	5e-31	bHLH family protein
CCG004227	9.96449	3.60965	2.58043	0.966372	1.65778	bHLH	AT4G25410.1	4e-46	bHLH family protein
CCG004357	8.18122	7.0938	39.8123	53.1376	32.0715	bHLH	AT1G68810.1	6e-38	bHLH family protein
CCG004547	9.20793	14.9955	19.3841	11.1645	19.4582	bHLH	AT2G41130.1	2e-90	bHLH family protein
CCG004585	1.37593	2.1663	1.49762	0.283873	0.188746	bHLH	AT3G21330.1	9e-90	bHLH family protein
CCG005287	28.3547	17.7983	7.76298	14.1827	11.5281	bHLH	AT4G02590.2	4e-84	bHLH family protein
CCG005589	96.1698	51.3482	21.4051	32.8063	51.2413	bHLH	AT4G09820.1	3e-96	bHLH family protein
CCG006743	6.22888	3.28613	0.702482	0.333636	0.910592	bHLH	AT3G06120.1	2e-85	bHLH family protein
CCG007017	0.64871	2.42977	0.49671	0.928101	1.10659	bHLH	AT4G17880.1	1e-108	bHLH family protein
CCG007958	8.93314	6.36103	4.34951	2.58902	5.66069	bHLH	AT1G26945.1	5e-34	bHLH family protein
CCG008077	24.5959	17.4721	9.72213	13.6067	26.957	bHLH	AT5G41315.1	0	bHLH family protein
CCG008414	53.7101	175.128	203.876	242.072	106.291	bHLH	AT2G42280.1	8e-63	bHLH family protein
CCG009227	88.3941	39.1643	44.9508	92.4596	59.0192	bHLH	AT1G05710.3	5e-60	bHLH family protein
CCG009806	0.188666	0.449789	1.90944	5.59995	9.77237	bHLH	AT4G20970.1	3e-29	bHLH family protein
CCG009808	0.0794297	0.0494663	1.30525	2.47092	3.3235	bHLH	AT4G20970.1	7e-27	bHLH family protein
CCG009848	10.9776	10.5962	8.34367	16.9603	22.7254	bHLH	AT3G26744.1	1e-138	bHLH family protein
CCG009918	470.447	189.715	104.43	72.6118	51.9261	bHLH	AT1G72210.1	1e-100	bHLH family protein
CCG010024	1.68728	3.02164	6.31561	2.58546	0.4372	bHLH	AT5G50915.2	2e-56	bHLH family protein
CCG010680	0.831236	1.62974	0.267288	0.0198035	0.181751	bHLH	AT4G21330.1	2e-46	bHLH family protein
CCG011113	36.7534	9.02484	5.18341	10.0768	9.70806	bHLH	AT1G22490.1	2e-63	bHLH family protein
CCG011234	0.494293	3.11477	2.07088	1.03892	0.359373	bHLH	AT4G00050.1	1e-107	bHLH family protein
CCG011606	35.693	23.4279	65.3973	86.5815	29.6794	bHLH	AT2G42280.1	1e-102	bHLH family protein
CCG011940	67.5485	40.5193	21.0159	11.26	14.7332	bHLH	AT1G10120.1	5e-76	bHLH family protein
CCG013017	6.33871	3.55712	2.59771	1.59014	1.27632	bHLH	AT5G48560.1	7e-84	bHLH family protein
CCG014668	0.0114525	0.62748	0.0391012	0	0.19922	bHLH	AT3G22100.1	2e-27	bHLH family protein
CCG014861	3.7186	22.8757	24.7013	11.2283	7.1605	bHLH	AT4G25400.1	1e-40	bHLH family protein
CCG014862	4.90963	67.2741	15.8685	22.5823	27.8294	bHLH	AT5G51790.1	5e-38	bHLH family protein
CCG014989	12.1941	10.6757	19.8258	20.9687	11.4439	bHLH	AT3G19860.1	1e-90	bHLH family protein
CCG016403	0.0263639	1.50536	0.0932817	0.109734	0.151527	bHLH	AT2G22760.1	4e-42	bHLH family protein
CCG016485	0.228986	0.412555	2.07592	1.15126	1.05733	bHLH	AT4G20970.1	2e-19	bHLH family protein
CCG016634	44.3949	35.2048	9.8972	11.7254	24.6507	bHLH	AT4G29100.1	9e-49	bHLH family protein
CCG018252	10.667	10.9193	10.7491	2.85078	1.84267	bHLH	AT4G36930.1	2e-51	bHLH family protein
CCG018319	0.873495	5.16126	0.132011	0.0400294	0.139113	bHLH	AT2G46810.1	5e-82	bHLH family protein
CCG021383	0.309197	0.458873	0.824807	1.04648	0.807875	bHLH	AT4G00120.1	2e-48	bHLH family protein
CCG023445	2.07917	3.36542	13.6356	6.30971	4.47286	bHLH	AT3G26744.1	1e-167	bHLH family protein
CCG024279	2.68745	12.813	7.56099	8.65167	48.6884	bHLH	AT5G56960.1	3e-82	bHLH family protein
CCG024644	35.6799	21.6415	4.88923	2.94573	7.5819	bHLH	AT5G41315.1	1e-166	bHLH family protein
CCG024649	0.289939	4.95615	0.992473	0.389768	0.271956	bHLH	AT2G18300.2	2e-52	bHLH family protein
CCG025561	21.2153	11.4749	4.8002	1.31902	4.76062	bHLH	AT1G51140.1	1e-74	bHLH family protein
CCG025707	2.62864	3.03633	0.135242	0.185915	0.0709621	bHLH	AT2G40200.1	2e-22	bHLH family protein
CCG026110	16.4354	37.8149	28.8808	26.3516	47.0372	bHLH	AT1G31050.1	4e-59	bHLH family protein
CCG026837	19.0424	63.1315	24.1901	9.54698	10.9479	bHLH	AT5G57150.1	3e-96	bHLH family protein
CCG026922	5.62149	3.19828	2.74318	4.00324	11.0361	bHLH	AT4G37850.1	4e-67	bHLH family protein
CCG027290	15.619	7.38621	1.67181	0.669464	4.34423	bHLH	AT1G27660.1	3e-79	bHLH family protein
CCG027755	19.0373	10.9465	6.56016	4.1127	5.98478	bHLH	AT1G72210.1	2e-85	bHLH family protein
CCG028694	5.22931	1.55948	1.18524	0.189018	0.169536	bHLH	AT4G00050.1	2e-22	bHLH family protein
CCG028757	6.03571	5.08327	1.35413	1.14624	5.02949	bHLH	AT1G68810.1	1e-108	bHLH family protein
CCG011976	0.134809	0.122198	0.59818	1.20519	0.676004	bHLH	AT3G56970.1	2e-50	bHLH family protein
CCG027461	1.02162	61.7956	3.28044	4.26311	27.5881	bHLH	AT5G43650.1	5e-49	bHLH family protein 92
CCG008004	19.9142	27.8027	20.7897	4.18576	5.99076	bHLH	AT1G59640.1	2e-95	BIG PETAL P
CCG028300	0.486575	0.25289	0.247421	0	0.0357182	bHLH	AT1G18400.1	3e-63	BR enhanced expression 1
CCG024936	3.87707	4.34104	9.15858	5.59362	1.40724	bHLH	AT1G73830.2	4e-39	BR enhanced expression 3
CCG010712	8.28893	4.42106	3.28586	3.58692	1.69985	bHLH	AT4G34530.1	3e-65	cryptochrome-interacting basic-helix-loop-helix 1
CCG016014	53.6149	52.8166	125.494	156.076	122.969	bHLH	AT2G24260.1	6e-89	LJRHL1-like 1
CCG025621	1.42378	0.86834	1.30424	0.559384	0.100537	bHLH	AT2G43010.2	6e-48	phytochrome interacting factor 4
CCG002824	8.45328	5.89635	6.24917	2.28307	1.13954	bHLH	AT5G37800.1	4e-66	RHD SIX-LIKE 1
CCG010213	0.211768	1.73323	0.521106	0.482905	0.228062	bHLH	AT4G33880.1	3e-49	ROOT HAIR DEFECTIVE 6-LIKE 2
CCG010214	0.51782	3.25147	0.80578	0.212831	0.183401	bHLH	AT4G33880.1	1e-57	ROOT HAIR DEFECTIVE 6-LIKE 2
CCG010215	0.317971	6.22384	0.505317	0.069971	0.0370705	bHLH	AT4G33880.1	1e-56	ROOT HAIR DEFECTIVE 6-LIKE 2
CCG006807	0.871653	1.38227	1.16572	1.135	2.63538	bHLH
CCG008884	14.1306	13.3198	8.89142	5.15484	14.9714	bZIP	AT3G56850.1	4e-88	ABA-responsive element binding protein 3
CCG011181	57.6692	199.343	180.966	117.075	66.0678	bZIP	AT4G34000.1	1e-101	abscisic acid responsive elements-binding factor 3
CCG028634	7.30706	13.8079	63.8577	143.305	32.0559	bZIP	AT5G49450.1	8e-19	basic leucine-zipper 1
CCG016560	6.63687	0.949464	15.6393	7.67581	7.25798	bZIP	AT3G30530.1	1e-60	basic leucine-zipper 42
CCG027370	2.72926	2.33237	13.8656	10.8885	5.89117	bZIP	AT3G30530.1	8e-48	basic leucine-zipper 42
CCG000932	142.32	145.367	126.649	188.774	368.157	bZIP	AT1G75390.1	4e-40	basic leucine-zipper 44
CCG001444	252.388	205.529	107.632	130.889	347.876	bZIP	AT1G75390.1	1e-45	basic leucine-zipper 44
CCG027295	13.2477	21.6082	8.29394	2.90863	10.2227	bZIP	AT1G75390.1	3e-49	basic leucine-zipper 44
CCG005799	0.0365415	0.879068	0.169369	0	0.360388	bZIP	AT5G60830.1	5e-29	basic leucine-zipper 70
CCG024473	120.937	107.37	181.673	230.994	236.401	bZIP	AT3G62420.1	4e-53	basic region/leucine zipper motif 53
CCG010790	79.7609	108.037	104.328	113.114	180.832	bZIP	AT1G42990.1	8e-28	basic region/leucine zipper motif 60
CCG009305	41.5631	33.7835	17.5942	8.49135	11.8752	bZIP	AT2G40620.1	1e-104	bZIP family protein
CCG011593	53.3011	117.714	60.2573	69.0842	41.2047	bZIP	AT4G38900.3	0	bZIP family protein
CCG013955	122.7	73.6035	63.338	49.9695	33.2585	bZIP	AT5G11260.1	2e-69	bZIP family protein
CCG014011	23.5013	11.8508	2.83615	3.74353	4.52549	bZIP	AT1G58110.1	3e-18	bZIP family protein
CCG020977	62.8355	53.5389	42.5376	34.8976	28.775	bZIP	AT2G40620.1	1e-106	bZIP family protein
CCG023290	49.6979	46.7343	73.1126	97.6918	58.9222	bZIP	AT5G65210.2	1e-162	bZIP family protein
CCG026635	113.312	42.1042	16.1961	3.6326	2.5188	bZIP	AT3G58120.1	1e-101	bZIP family protein
CCG028775	8.37528	7.44943	8.33935	3.72052	2.00166	bZIP	AT1G68640.1	1e-178	bZIP family protein
CCG001773	21.0228	10.8181	34.5219	53.8099	61.8782	bZIP	AT2G16770.1	3e-52	bZIP family protein 23
CCG000176	45.7483	37.4987	38.0931	16.0411	10.4881	bZIP	AT3G58120.1	1e-113	bZIP family protein 61
CCG005290	19.382	26.8425	77.9424	118.809	58.1629	bZIP	AT5G28770.2	8e-79	bZIP family protein 63
CCG012282	10.89	7.59815	17.8085	25.1918	44.1041	bZIP	AT5G06839.3	1e-173	bZIP family protein 65
CCG025283	86.9234	72.1861	323.086	377.692	113.697	bZIP	AT4G36730.2	5e-51	G-box binding factor 1
CCG029074	44.4521	111.678	101.702	74.1184	24.1933	bZIP	AT2G46270.1	1e-119	G-box binding factor 3
CCG023789	3.4047	0.951027	2.55462	2.41426	1.30142	bZIP	AT3G17609.2	2e-49	HY5-homolog
CCG004560	62.3674	63.4463	89.8435	118.46	168.666	bZIP	AT3G12250.1	1e-162	TGACG motif-binding factor 6
CCG003182	0.440762	2.35811	0.280891	0.259255	0.800364	C2H2	AT5G56200.1	2e-07	C2H2 family protein
CCG004434	12.9757	6.82458	10.6283	4.13173	2.49783	C2H2	AT2G28200.1	8e-59	C2H2 family protein
CCG004770	20.3548	33.6098	48.668	23.5896	29.6259	C2H2	AT1G34370.3	6e-18	C2H2 family protein
CCG004810	0.871273	1.22676	0.335967	0	0.0694574	C2H2	AT5G10970.1	1e-42	C2H2 family protein
CCG006881	109.35	68.3311	36.4203	22.9781	17.5126	C2H2	AT2G29660.1	1e-124	C2H2 family protein
CCG008991	0.178284	0.139046	0.606359	1.17111	0.257376	C2H2	AT2G28710.1	6e-36	C2H2 family protein
CCG008992	3.01767	5.00837	13.701	30.5424	23.8514	C2H2	AT5G59820.1	4e-39	C2H2 family protein
CCG008993	3.05171	3.68167	18.3962	27.5032	60.2289	C2H2	AT5G59820.1	6e-40	C2H2 family protein
CCG014199	5.25421	28.6064	49.5431	65.5897	131.921	C2H2	AT2G37430.1	7e-51	C2H2 family protein
CCG014280	12.2879	10.4219	6.07434	6.41165	4.78093	C2H2	AT5G06070.1	1e-28	C2H2 family protein
CCG015102	8.62311	2.78223	19.3234	10.9665	3.27558	C2H2	AT5G04390.1	3e-74	C2H2 family protein
CCG017291	87.83	83.9168	155.308	137.633	100.098	C2H2	AT1G34370.2	0	C2H2 family protein
CCG027801	0.478595	0.654806	0.489955	0.624592	2.6961	C2H2	AT4G17810.1	5e-17	C2H2 family protein
CCG008639	32.2659	16.8086	14.4302	8.81692	17.2225	C2H2	AT3G60580.1	6e-46	C2H2-like zinc finger protein
CCG011229	10.109	4.59344	4.95186	7.4954	5.00149	C2H2	AT3G60580.1	6e-65	C2H2-like zinc finger protein
CCG011787	18.605	16.9412	9.60338	4.88463	6.91942	C2H2	AT1G75710.1	1e-106	C2H2-like zinc finger protein
CCG015709	65.2635	27.4923	10.2009	4.94317	4.85967	C2H2	AT1G75710.1	0	C2H2-like zinc finger protein
CCG020514	46.968	22.6575	10.4591	9.81244	10.7011	C2H2	AT5G44160.1	1e-120	C2H2-like zinc finger protein
CCG021262	3.10429	0.936478	0.541404	0.882406	1.02156	C2H2	AT1G26610.1	4e-20	C2H2-like zinc finger protein
CCG021263	4.50744	0.842985	0.558522	0.724881	0.736191	C2H2	AT1G26590.1	6e-16	C2H2-like zinc finger protein
CCG025290	40.7896	39.4145	65.6859	133.927	94.6754	C2H2	AT5G66730.1	0	C2H2-like zinc finger protein
CCG025475	9.52433	6.9118	3.01993	1.46069	2.05732	C2H2	AT2G01940.1	1e-159	C2H2-like zinc finger protein
CCG028705	13.6312	1.61649	2.82555	5.5872	4.81908	C2H2	AT1G26610.1	3e-65	C2H2-like zinc finger protein
CCG008827	3.89314	5.25721	2.10843	0.574387	0.779226	C2H2	AT3G44750.2	4e-19	histone deacetylase 3
CCG000732	70.2636	29.4489	40.2466	51.5532	29.6262	C2H2	AT3G50700.1	1e-111	indeterminate(ID)-domain 2
CCG002295	18.2979	12.688	4.5456	5.49763	6.87592	C2H2	AT3G50700.1	1e-114	indeterminate(ID)-domain 2
CCG003885	4.40924	3.26308	3.32392	2.43596	1.47854	C2H2	AT3G50700.1	2e-85	indeterminate(ID)-domain 2
CCG004636	22.7602	9.28073	5.93921	8.2185	10.8373	C2H2	AT1G55110.1	1e-127	indeterminate(ID)-domain 7
CCG011389	20.3373	20.5252	9.34867	5.02506	10.3569	C2H2	AT3G48430.1	0	relative of early flowering 6
CCG010222	46.4744	118.473	115.793	180.126	160.861	C2H2	AT1G27730.1	1e-61	salt tolerance zinc finger
CCG017548	0.0602889	1.45859	0.0227945	0.281323	0.516723	C2H2	AT1G27730.1	2e-45	salt tolerance zinc finger
CCG007308	52.5837	126.982	167.766	247.234	255.002	C2H2	AT1G27730.1	6e-60	salt tolerance zinc finger
CCG005981	7.15005	5.30778	7.95704	13.5167	19.2656	C2H2	AT1G08290.1	1e-125	WIP domain protein 3
CCG017550	0.0662926	1.77631	3.77768	0.0729216	0	C2H2	AT5G57520.1	8e-31	zinc finger protein 2
CCG005864	24.6353	20.1793	10.3647	11.4484	10.8592	C2H2	AT1G66140.1	4e-53	zinc finger protein 4
CCG017923	28.0194	39.1342	121.31	110.581	90.2834	C2H2	AT1G10480.1	3e-16	zinc finger protein 5
CCG026267	44.2474	20.4492	11.4252	13.9399	13.071	C2H2	AT2G37740.1	1e-31	zinc-finger protein 10
CCG012810	0.156669	0.25899	0.441581	0.620803	0.784966	C2H2	AT3G19580.2	1e-18	zinc-finger protein 2
CCG002702	1.96875	1.10811	0.956484	0.622816	0.607909	C2H2
CCG027524	30.9114	33.9523	45.4212	54.2528	33.8685	C2H2
CCG002871	9.11889	10.7007	4.97172	0.531075	0.0439254	C3H	AT1G66810.1	9e-76	C3H family protein
CCG006924	7.88625	1.20578	72.2589	110.908	46.9941	C3H	AT1G03790.1	8e-84	C3H family protein
CCG008483	67.5677	124.842	279.613	150.879	229.197	C3H	AT5G58620.1	0	C3H family protein
CCG010826	0	0.530391	0.0413397	0	0.0840608	C3H	AT5G07500.1	7e-68	C3H family protein
CCG013198	17.8782	19.2962	12.8455	13.5226	34.7114	C3H	AT3G12130.1	1e-64	C3H family protein
CCG014770	30.6334	63.8064	23.0045	22.0395	17.7559	C3H	AT4G29190.1	1e-144	C3H family protein
CCG017386	100.53	109.542	331.539	444.382	164.551	C3H	AT2G19810.1	1e-110	C3H family protein
CCG020878	59.1287	165.485	113.409	95.5371	208.007	C3H	AT2G40140.2	0	C3H family protein
CCG023884	14.6295	12.5091	13.9489	10.7837	47.9172	C3H	AT3G19360.1	7e-94	C3H family protein
CCG024282	5.95382	6.19026	7.97394	7.39228	12.1268	C3H	AT1G04990.2	0.0003	C3H family protein
CCG028434	26.4926	23.0015	22.089	19.8296	11.7358	C3H	AT5G18550.1	1e-169	C3H family protein
CCG008888	19.2433	20.2854	23.1771	21.0163	38.8287	C3H	AT2G41900.1	0	CCCH-type zinc finger protein with ARM repeat domain
CCG028994	4.71965	5.02934	2.65641	1.45102	3.26489	C3H	AT5G12850.1	0	CCCH-type zinc finger protein with ARM repeat domain
CCG002955	24.946	23.108	23.6648	38.0055	51.1667	C3H	AT3G02830.1	1e-160	zinc finger protein 1
CCG020003	78.5505	93.4029	142.438	183.579	136.42	CAMTA	AT5G64220.2	0	Calmodulin-binding transcription activator protein with CG-1 and Ankyrin domains
CCG008272	19.7751	44.4004	57.9215	47.3922	19.5262	CO-like	AT5G48250.1	1e-30	B-box type zinc finger protein with CCT domain
CCG028805	4.53045	1.78307	8.65124	3.74022	1.34621	CO-like	AT1G25440.1	1e-107	B-box type zinc finger protein with CCT domain
CCG029545	62.9438	65.075	73.3115	41.8831	19.1163	CO-like	AT1G28050.1	1e-111	B-box type zinc finger protein with CCT domain
CCG024867	0.75454	0.283237	0.397066	1.55418	3.34798	CO-like	AT3G02380.1	1e-146	CONSTANS-like 2
CCG007127	52.543	49.0073	40.9744	33.7795	17.6076	CO-like	AT5G24930.1	1e-140	CONSTANS-like 4
CCG006398	31.2955	28.3848	13.9553	9.90492	13.6528	CPP	AT3G22780.1	1e-122	Tesmin/TSO1-like CXC domain-containing protein
CCG001411	46.0905	77.9528	49.501	37.0936	13.7931	DBB	AT4G39070.1	4e-68	DBB family protein
CCG027140	58.202	54.6627	49.6754	101.116	89.2706	DBB	AT1G06040.1	1e-105	DBB family protein
CCG018909	33.1123	28.3226	57.551	56.7678	37.9335	DBB	AT1G78600.1	6e-89	light-regulated zinc finger protein 1
CCG015661	57.4403	42.8472	22.6206	10.2476	10.7163	DBB	AT1G75540.1	5e-83	salt tolerance homolog2
CCG005675	3.36414	3.75791	3.60626	8.9163	16.4311	Dof	AT5G39660.1	2e-90	cycling DOF factor 2
CCG007895	13.519	28.2982	24.4871	37.6527	45.209	Dof	AT5G39660.1	1e-113	cycling DOF factor 2
CCG013965	3.66049	3.0511	4.42384	1.86409	0.659114	Dof	AT5G39660.1	1e-55	cycling DOF factor 2
CCG011353	12.8786	44.9152	31.2352	39.0332	54.1451	Dof	AT3G47500.1	1e-122	cycling DOF factor 3
CCG003697	31.9124	34.2293	68.5369	42.0435	62.7441	Dof	AT3G61850.4	5e-68	Dof family protein
CCG013808	6.9992	12.2201	13.8758	14.5344	65.386	Dof	AT1G28310.2	3e-31	Dof family protein
CCG016242	15.5053	13.9954	3.47152	3.08772	6.42675	Dof	AT2G28810.2	3e-34	Dof family protein
CCG020463	17.4878	9.7807	6.90194	10.2438	9.57814	Dof	AT3G61850.4	7e-62	Dof family protein
CCG025147	0.168255	1.44083	0.250043	0.0602027	0.066086	Dof	AT1G21340.1	4e-47	Dof family protein
CCG027696	35.2273	27.2258	23.3591	15.5384	13.5046	Dof	AT1G28310.1	1e-46	Dof family protein
CCG029735	11.154	14.0274	8.71495	3.68457	5.98112	Dof	AT5G62940.1	2e-60	Dof family protein
CCG029791	0.292976	0.45344	1.33458	1.69436	1.81498	Dof	AT3G52440.1	1e-48	Dof family protein
CCG002365	8.02286	14.8446	15.7225	10.658	8.95179	Dof	AT3G50410.1	4e-38	OBF binding protein 1
CCG002374	8.10084	17.2112	10.4417	6.87357	6.66932	Dof	AT5G60850.1	1e-54	OBF binding protein 4
CCG025270	2.8489	3.5968	1.44443	0.407088	1.80681	Dof	AT3G55370.1	6e-52	OBF-binding protein 3
CCG007941	27.5195	22.8016	11.6679	6.85278	14.2153	E2F/DP	AT3G48160.1	1e-107	DP-E2F-like 1
CCG018484	4.81708	12.8962	13.527	10.2513	5.00716	E2F/DP	AT2G36010.1	2e-77	E2F transcription factor 3
CCG015707	1.54431	0.850009	0.577181	0.133312	0.457626	E2F/DP	AT1G47870.2	1e-69	E2F/DP family protein
CCG025269	15.425	15.3891	10.6102	3.05095	6.45293	E2F/DP	AT5G03415.1	2e-74	Transcription factor DP
CCG008878	34.9233	48.0701	63.8765	68.0887	51.3721	EIL	AT3G20770.1	0	EIL family protein
CCG022990	79.4977	110.811	142.128	134.567	153.428	EIL	AT3G20770.1	0	EIL family protein
CCG025593	25.0805	22.1998	69.0577	60.0534	53.3825	EIL	AT1G73730.1	0	ETHYLENE-INSENSITIVE3-like 3
CCG015113	0.0510526	1.085	0.118313	0.0697383	0.0422429	ERF	AT5G51990.1	3e-53	C-repeat-binding factor 4
CCG015457	0.626566	24.7518	1.5812	2.964	5.6679	ERF	AT5G51990.1	2e-69	C-repeat-binding factor 4
CCG027037	0.0366	0.781508	0.427523	0.301021	4.3968	ERF	AT5G51990.1	7e-69	C-repeat-binding factor 4
CCG027064	4.55787	75.6844	13.8055	2.95484	3.88638	ERF	AT5G51990.1	4e-72	C-repeat-binding factor 4
CCG012360	9.22052	8.43846	4.24887	0.398736	2.80595	ERF	AT4G23750.1	8e-56	cytokinin response factor 2
CCG001367	3.75708	3.60476	0.647354	0.109207	1.06954	ERF	AT4G27950.1	9e-62	cytokinin response factor 4
CCG009317	6.47567	15.27	7.67452	11.1669	12.2835	ERF	AT4G27950.1	1e-42	cytokinin response factor 4
CCG010494	1.8679	1.83562	1.21222	7.50559	3.27106	ERF	AT4G27950.1	4e-48	cytokinin response factor 4
CCG028591	12.5143	34.2477	25.0488	30.9187	17.3861	ERF	AT5G67190.1	4e-59	DREB and EAR motif protein 2
CCG027708	34.0448	41.8937	69.7663	99.6229	96.7531	ERF	AT1G28370.1	2e-40	ERF domain protein 11
CCG027706	2.15017	1.11895	1.22666	0.813462	6.45934	ERF	AT1G28360.1	5e-54	ERF domain protein 12
CCG010134	24.8914	64.4855	113.805	132.688	149.495	ERF	AT5G44210.1	1e-47	erf domain protein 9
CCG000248	0.719846	26.557	3.87414	6.57537	3.73844	ERF	AT1G22810.1	1e-48	ERF family protein
CCG000258	0.0385307	1.95678	0.479719	0.0764226	0.0903195	ERF	AT1G71450.1	3e-62	ERF family protein
CCG000383	0.712824	0.852732	9.75775	13.1564	47.5304	ERF	AT3G23230.1	1e-45	ERF family protein
CCG000384	0.0754181	0.0879221	2.6022	1.46982	2.69082	ERF	AT3G23230.1	3e-52	ERF family protein
CCG001759	102.416	180.443	146.734	167.076	151.495	ERF	AT5G07580.1	7e-41	ERF family protein
CCG001760	35.8228	23.6697	52.0481	119.761	86.2605	ERF	AT5G07580.1	1e-38	ERF family protein
CCG002199	0.741346	2.07551	1.18645	0.392293	0.902848	ERF	AT2G40340.1	6e-55	ERF family protein
CCG004326	12.2985	11.757	5.54317	3.14902	1.77069	ERF	AT2G44940.1	2e-52	ERF family protein
CCG004801	0.448554	0.317965	4.30348	0.49977	0.760699	ERF	AT5G25190.1	1e-72	ERF family protein
CCG005765	0.638198	0.225886	0.104353	0.026356	0.0160909	ERF	AT1G80580.1	1e-29	ERF family protein
CCG006663	1.03202	1.2676	0.148368	0	0.198534	ERF	AT1G64380.1	5e-67	ERF family protein
CCG007511	143.373	34.9492	321.716	461.45	206.393	ERF	AT1G72360.3	4e-39	ERF family protein
CCG008897	0.131436	1.69217	0.369021	0.156117	0.187128	ERF	AT3G57600.1	1e-102	ERF family protein
CCG009625	14.1402	29.0448	15.2739	13.5415	23.8582	ERF	AT4G13040.1	3e-48	ERF family protein
CCG009863	4.36221	2.03326	30.4148	218.709	184.122	ERF	AT5G61890.1	2e-55	ERF family protein
CCG010746	3.45634	34.1528	273.397	296.573	303.055	ERF	AT2G33710.1	9e-38	ERF family protein
CCG013268	0.597401	1.11373	0.148363	0.0478733	0.0436108	ERF	AT5G11590.1	5e-51	ERF family protein
CCG015458	2.71618	11.0612	0.286174	0.164157	0.232492	ERF	AT5G52020.1	5e-45	ERF family protein
CCG015907	0.605219	0.668066	2.13228	3.43341	3.39154	ERF	AT3G23230.1	5e-44	ERF family protein
CCG016647	32.4667	10.641	2.48342	3.11242	6.92218	ERF	AT5G11590.1	8e-62	ERF family protein
CCG017039	5.63132	34.3266	9.93634	13.9348	11.3809	ERF	AT2G20880.1	5e-62	ERF family protein
CCG018064	19.1852	8.48107	16.3251	29.4001	18.8421	ERF	AT4G13620.1	6e-73	ERF family protein
CCG020926	32.0296	68.7961	93.2242	113.103	113.628	ERF	AT2G40340.1	9e-54	ERF family protein
CCG021140	18.308	9.17045	8.96676	4.27931	6.11954	ERF	AT5G25190.1	2e-78	ERF family protein
CCG021141	2.14797	2.10621	0.659592	0.236155	0.430133	ERF	AT5G25190.1	4e-83	ERF family protein
CCG021350	1.94962	60.1108	41.0244	42.777	60.5967	ERF	AT5G64750.1	1e-46	ERF family protein
CCG022928	0.334543	2.17157	1.61431	0.5309	0.703431	ERF	AT2G40340.1	5e-53	ERF family protein
CCG023415	3.5584	10.3724	3.48671	1.84658	4.36992	ERF	AT5G13910.1	1e-50	ERF family protein
CCG024129	1.64187	3.7663	2.55117	1.15881	1.91083	ERF	AT2G40340.1	3e-52	ERF family protein
CCG026387	1.21735	4.10383	1.97525	4.75518	3.75606	ERF	AT1G19210.1	7e-60	ERF family protein
CCG026747	31.4512	7.97955	5.24804	5.62162	1.35386	ERF	AT5G11590.1	5e-68	ERF family protein
CCG027065	5.45344	37.7757	5.10243	0.27351	0.257147	ERF	AT5G52020.1	4e-51	ERF family protein
CCG027638	0.704008	1.17735	19.7013	43.3872	30.9107	ERF	AT4G18450.1	4e-54	ERF family protein
CCG028433	2.30812	11.7026	1.99377	1.70019	1.62145	ERF	AT5G18560.1	8e-64	ERF family protein
CCG028800	36.1436	47.3175	21.3808	12.1243	60.5479	ERF	AT1G68550.1	1e-42	ERF family protein
CCG029592	4.14675	5.66113	1.27296	1.20655	5.47612	ERF	AT1G28160.1	1e-50	ERF family protein
CCG000385	1.7429	18.0839	23.917	32.1418	55.0408	ERF	AT3G23240.1	4e-84	ethylene response factor 1
CCG011527	0.674033	4.75995	8.11128	8.96531	35.0516	ERF	AT3G23240.1	3e-68	ethylene response factor 1
CCG015909	9.71891	37.5458	105.005	114.678	148.941	ERF	AT3G23240.1	2e-70	ethylene response factor 1
CCG008686	9.49151	211.8	62.4809	47.3152	161.376	ERF	AT4G17500.1	6e-74	ethylene responsive element binding factor 1
CCG008687	14.3105	93.8738	105.773	114.801	170.929	ERF	AT4G17500.1	8e-85	ethylene responsive element binding factor 1
CCG019939	11.8178	29.9489	52.05	31.5199	43.6287	ERF	AT4G17500.1	2e-58	ethylene responsive element binding factor 1
CCG027637	19.5067	123.889	227.726	267.19	442.065	ERF	AT4G17500.1	1e-40	ethylene responsive element binding factor 1
CCG000985	1.33095	0.474321	1.08002	2.74411	3.86313	ERF	AT1G50640.1	2e-29	ethylene responsive element binding factor 3
CCG013273	18.8908	64.7644	84.4619	87.887	59.2292	ERF	AT5G47230.1	2e-62	ethylene responsive element binding factor 5
CCG016179	0.361522	18.9943	3.92399	8.80808	4.90899	ERF	AT2G44840.1	1e-41	ethylene-responsive element binding factor 13
CCG016181	1.20965	26.3978	5.46658	15.0275	7.68982	ERF	AT2G44840.1	2e-62	ethylene-responsive element binding factor 13
CCG018266	13.3058	41.2375	48.7625	57.8138	60.975	ERF	AT1G46768.1	1e-52	related to AP2 1
CCG006325	0.116759	1.05259	0.148557	0.0437043	0.0517298	ERF	AT5G19790.1	3e-32	related to AP2 11
CCG012655	20.7292	0.999586	1.06822	4.42414	1.13576	ERF	AT5G19790.1	5e-49	related to AP2 11
CCG003017	70.2682	179.191	96.9689	72.9478	92.6668	ERF	AT1G78080.1	3e-89	related to AP2 4
CCG004921	145.811	242.212	167.477	226.977	313.227	ERF	AT1G78080.1	2e-82	related to AP2 4
CCG023430	1.84475	2.30119	3.19159	2.40304	5.04175	ERF	AT5G13330.1	5e-41	related to AP2 6l
CCG029573	50.1508	49.145	167.526	326.892	369.414	ERF	AT5G13330.1	7e-50	related to AP2 6l
CCG027154	12.5603	8.75322	8.97544	6.65029	3.87047	FAR1	AT3G07500.1	6e-40	FAR1 family protein
CCG000130	45.2089	93.4322	65.7613	77.1551	111.077	G2-like	AT2G03500.1	4e-66	G2-like family protein
CCG003098	52.8311	65.6135	142.1	176.052	100.149	G2-like	AT5G29000.2	9e-82	G2-like family protein
CCG005052	0.0360387	0.0371968	3.85046	37.8795	16.36	G2-like	AT2G40260.1	3e-25	G2-like family protein
CCG008386	1.62126	6.91789	6.91895	1.19848	1.02127	G2-like	AT5G06800.1	1e-52	G2-like family protein
CCG008513	14.3364	12.09	7.29402	5.44646	5.92195	G2-like	AT2G38300.1	7e-50	G2-like family protein
CCG008615	1.21392	1.7549	7.44582	7.11281	2.85333	G2-like	AT2G40260.1	4e-31	G2-like family protein
CCG010872	2.70846	4.54673	21.5358	7.70878	13.1138	G2-like	AT5G06800.1	3e-74	G2-like family protein
CCG010910	13.9747	6.23679	9.42231	12.1245	6.33703	G2-like	AT2G38300.1	1e-38	G2-like family protein
CCG013842	9.91474	20.5072	5.07254	3.23285	7.23083	G2-like	AT1G32240.1	2e-94	G2-like family protein
CCG013871	56.1713	94.0006	91.1286	23.7899	9.7022	G2-like	AT5G45580.1	1e-78	G2-like family protein
CCG015283	34.3871	35.3312	6.8617	5.78816	8.29899	G2-like	AT5G42630.1	6e-62	G2-like family protein
CCG016234	15.5689	7.32365	22.2338	24.0143	20.1043	G2-like	AT4G37180.1	3e-64	G2-like family protein
CCG018057	35.5359	30.8369	21.8925	11.4433	9.10152	G2-like	AT3G24120.1	1e-36	G2-like family protein
CCG018058	99.7614	87.0583	60.8001	31.9045	26.6445	G2-like	AT4G13640.1	1e-100	G2-like family protein
CCG025999	0.693279	1.06134	1.05602	1.48031	2.33258	G2-like	AT2G02060.1	7e-35	G2-like family protein
CCG026452	7.91664	15.6307	6.3026	4.34761	5.58006	G2-like	AT2G03500.1	1e-130	G2-like family protein
CCG029287	0	0.481889	0.0687062	0.243464	0.174925	G2-like	AT2G01060.1	2e-20	G2-like family protein
CCG013791	1.4153	0.920102	1.45035	1.63873	5.00991	G2-like	AT2G20570.1	2e-98	GBF's pro-rich region-interacting factor 1
CCG024621	4.21145	2.83832	1.62077	0.141289	0.25214	GATA	AT3G50870.1	2e-65	GATA family protein
CCG001488	49.8785	27.2187	12.0509	6.47985	7.24555	GATA	AT1G08000.2	5e-62	GATA transcription factor 10
CCG026767	36.5764	46.7569	36.8914	4.68118	2.70198	GATA	AT5G25830.1	2e-93	GATA transcription factor 12
CCG028607	66.0547	37.307	22.3526	11.9863	15.1101	GATA	AT3G06740.1	4e-54	GATA transcription factor 15
CCG029454	13.4048	5.3459	2.25602	1.80242	8.49188	GATA	AT5G26930.1	3e-20	GATA transcription factor 23
CCG011240	75.4957	142.652	137.852	53.4791	7.09086	GATA	AT3G60530.1	1e-71	GATA transcription factor 4
CCG000822	16.9276	21.1027	34.8211	70.9613	103.679	GATA	AT5G66320.2	2e-52	GATA transcription factor 5
CCG005939	96.2191	52.0501	15.3349	7.40456	12.248	GATA	AT4G32890.1	3e-48	GATA transcription factor 9
CCG006114	5.86927	3.69103	0.941317	2.16413	3.8074	GATA	AT4G32890.1	9e-42	GATA transcription factor 9
CCG015781	32.6988	26.3653	42.5296	52.3273	44.6094	GATA	AT4G32890.1	1e-11	GATA transcription factor 9
CCG016658	52.2051	60.8285	14.0383	0.512412	0.534764	GATA	AT4G32890.1	4e-71	GATA transcription factor 9
CCG001546	0.164551	4.67666	1.22042	0.92656	2.14272	GeBP	AT1G66420.1	2e-09	DNA-binding storekeeper protein-related transcriptional regulator
CCG003467	4.5978	1.01653	0.951716	0.507021	0.353976	GeBP	AT5G28040.1	1e-50	DNA-binding storekeeper protein-related transcriptional regulator
CCG003468	21.6278	16.0191	22.3043	20.6796	41.1569	GeBP	AT5G28040.1	2e-83	DNA-binding storekeeper protein-related transcriptional regulator
CCG014671	10.379	9.52839	3.7963	1.48599	12.3175	GeBP	AT1G61730.1	4e-29	DNA-binding storekeeper protein-related transcriptional regulator
CCG003996	76.9545	40.6142	41.9015	49.0454	32.5011	GRAS	AT4G00150.1	1e-131	GRAS family protein
CCG004704	8.77383	3.84324	2.1459	1.73748	4.15648	GRAS	AT3G13840.1	1e-158	GRAS family protein
CCG005179	58.0174	80.0712	59.0991	31.4448	21.49	GRAS	AT2G01570.1	0	GRAS family protein
CCG010942	3.44021	1.5339	0.847145	1.12896	0.979866	GRAS	AT3G49950.1	1e-180	GRAS family protein
CCG012824	0.695576	0.206781	0.0472127	0.0895907	0.18228	GRAS	AT1G55580.1	1e-105	GRAS family protein
CCG012897	11.2254	10.8751	5.40329	2.57135	3.32536	GRAS	AT4G37650.1	0	GRAS family protein
CCG014656	0.493819	0.027395	0.0842089	0.173995	0.381967	GRAS	AT3G49950.1	1e-121	GRAS family protein
CCG015468	13.7978	7.4914	1.70682	0.5254	1.00336	GRAS	AT1G63100.1	0	GRAS family protein
CCG019056	31.3608	8.61647	12.9596	12.508	17.0569	GRAS	AT4G08250.1	1e-170	GRAS family protein
CCG019423	7.13152	16.6918	17.0412	18.1517	11.9462	GRAS	AT5G48150.1	0	GRAS family protein
CCG021412	1.4318	0.237745	0.58613	0.347016	0.0399634	GRAS	AT4G08250.1	5e-45	GRAS family protein
CCG023483	0	0.110085	0.045349	0.0968296	0.162424	GRAS	AT3G54220.1	9e-90	GRAS family protein
CCG023855	17.3529	10.0131	5.5291	4.41047	4.03168	GRAS	AT1G14920.1	1e-163	GRAS family protein
CCG024848	13.6783	9.35781	5.11355	2.72745	5.75551	GRAS	AT5G41920.1	1e-141	GRAS family protein
CCG029241	0.227513	0.887584	0.587853	0.743816	1.15983	GRAS	AT1G07520.1	2e-16	GRAS family protein
CCG029242	0.106629	0.245957	0.213775	0.567804	0.242179	GRAS	AT4G08250.1	2e-16	GRAS family protein
CCG029243	0.268149	0.221506	2.2896	4.65171	1.49235	GRAS	AT4G08250.1	4e-17	GRAS family protein
CCG029244	0.0728601	0.273601	1.54521	1.06572	0.722132	GRAS	AT1G07520.1	2e-16	GRAS family protein
CCG029245	1.73695	2.73168	4.74109	3.98172	3.75438	GRAS	AT4G08250.1	1e-17	GRAS family protein
CCG010743	0	0.0314909	0.119953	0.411746	2.76758	GRAS	AT1G66350.1	6e-74	RGA-like 1
CCG011408	2.94145	0.848746	0.816548	1.96466	1.54088	GRAS	AT1G66350.1	7e-72	RGA-like 1
CCG006868	0.93885	5.81198	1.6387	0.8048	1.8867	GRAS	AT3G03450.1	2e-52	RGA-like 2
CCG028637	0	0	0.0675087	0.0345564	0.720884	GRAS	AT3G03450.1	4e-43	RGA-like 2
CCG002185	123.791	105.692	234.838	307.863	188.056	GRAS	AT1G21450.1	0	SCARECROW-like 1
CCG000031	13.6888	32.0148	33.502	30.6684	28.5715	GRAS	AT4G17230.1	0	SCARECROW-like 13
CCG000659	0.0104835	0.0120132	0.0823643	0.1213	0.205133	GRAS	AT1G07530.1	1e-151	SCARECROW-like 14
CCG000662	18.2043	119.952	40.3514	42.7989	76.3167	GRAS	AT1G07530.1	0	SCARECROW-like 14
CCG014101	15.8267	10.9146	26.3385	34.6625	22.986	GRAS	AT1G07530.1	0	SCARECROW-like 14
CCG019679	10.9278	32.368	28.4597	37.1288	38.391	GRAS	AT1G07530.1	0	SCARECROW-like 14
CCG019680	3.20902	8.28071	11.5029	13.245	25.7697	GRAS	AT1G07530.1	0	SCARECROW-like 14
CCG019681	2.1807	10.904	9.24096	5.70674	13.9055	GRAS	AT1G07530.1	1e-177	SCARECROW-like 14
CCG019682	0.480362	4.71704	4.88304	5.01751	7.46703	GRAS	AT1G07530.1	0	SCARECROW-like 14
CCG019696	5.75656	5.65563	9.36698	21.1438	12.8211	GRAS	AT1G07530.1	0	SCARECROW-like 14
CCG019698	47.8536	61.1988	53.3455	69.8064	132.215	GRAS	AT1G07530.1	0	SCARECROW-like 14
CCG017287	0.372295	0.776194	9.64849	1.7426	3.85283	GRAS	AT2G04890.1	4e-52	SCARECROW-like 21
CCG016614	1.39356	0.81306	10.0223	21.5579	8.74619	GRAS	AT1G50420.1	1e-100	scarecrow-like 3
CCG011946	71.0723	58.565	28.5181	11.2908	11.5737	GRF	AT2G22840.1	1e-110	growth-regulating factor 1
CCG006591	7.80093	5.27841	2.53571	0.126755	0.0720551	GRF	AT2G36400.1	1e-30	growth-regulating factor 3
CCG013114	11.1777	9.36257	10.2496	3.2414	3.13629	GRF	AT3G13960.1	7e-43	growth-regulating factor 5
CCG026344	14.6825	12.5573	4.78725	0.386767	1.10844	GRF	AT3G13960.1	5e-54	growth-regulating factor 5
CCG020435	0.99878	0.420157	1.47634	4.97783	0.431149	GRF	AT5G53660.1	1e-36	growth-regulating factor 7
CCG015026	19.676	18.6158	7.63464	5.1311	3.47664	GRF	AT2G45480.1	5e-43	growth-regulating factor 9
CCG003454	33.8459	85.0823	453.398	228.614	76.9373	HB-other	AT4G36740.1	9e-46	homeobox protein 40
CCG013956	5.17081	4.00536	9.48637	4.45655	6.81883	HB-other	AT5G11270.1	3e-76	overexpressor of cationic peroxidase 3
CCG016666	18.058	16.9649	12.1424	7.92975	7.68274	HB-other	AT3G18380.2	6e-54	sequence-specific DNA binding transcription factors;sequence-specific DNA binding
CCG012597	40.318	32.8762	43.4749	63.2417	42.4664	HB-other
CCG007961	508.236	229.47	124.077	108.174	59.4855	HD-ZIP	AT1G69780.1	1e-113	HD-ZIP family protein
CCG009251	19.1948	13.9953	7.71643	6.10648	6.02952	HD-ZIP	AT2G34710.1	0	HD-ZIP family protein
CCG012412	4.63169	4.04734	1.69735	3.43374	1.78071	HD-ZIP	AT5G60690.1	0	HD-ZIP family protein
CCG012901	3.13161	2.02715	0.959986	2.86042	2.11357	HD-ZIP	AT5G60690.1	0	HD-ZIP family protein
CCG016389	17.3642	38.6434	36.0904	21.2714	29.7994	HD-ZIP	AT4G37790.1	1e-114	HD-ZIP family protein
CCG016443	3.82514	7.6947	7.45846	4.35769	6.5568	HD-ZIP	AT4G37790.1	1e-112	HD-ZIP family protein
CCG017380	6.04157	4.74224	11.8404	5.25438	3.33019	HD-ZIP	AT4G37790.1	4e-61	HD-ZIP family protein
CCG019820	61.0445	27.998	41.6239	52.3286	108.201	HD-ZIP	AT1G79840.1	0	HD-ZIP family protein
CCG029759	1.30267	1.4376	0.991673	0.525243	0.244573	HD-ZIP	AT4G00730.1	0	HD-ZIP family protein
CCG007996	34.1248	73.434	93.1456	48.1658	51.9363	HD-ZIP	AT3G01470.1	2e-42	homeobox 1
CCG025043	138.328	73.8031	57.4173	50.2208	56.949	HD-ZIP	AT3G01470.1	1e-64	homeobox 1
CCG013353	3.2993	6.33519	10.4237	8.66167	5.80527	HD-ZIP	AT3G61890.1	2e-39	homeobox 12
CCG007022	0.350616	5.88913	30.0552	10.4571	8.48308	HD-ZIP	AT2G46680.1	1e-59	homeobox 7
CCG020441	2.30122	1.24708	3.22868	5.12718	1.45589	HD-ZIP	AT2G46680.1	6e-52	homeobox 7
CCG010903	27.433	33.9641	59.6027	58.9002	94.2299	HD-ZIP	AT5G06710.1	1e-109	homeobox from Arabidopsis thaliana
CCG026811	0.406132	0.642557	1.69848	1.11305	1.52544	HD-ZIP	AT5G06710.1	9e-54	homeobox from Arabidopsis thaliana
CCG000222	32.6412	16.1993	1.68895	0.367982	0.643647	HD-ZIP	AT3G01220.1	2e-74	homeobox protein 20
CCG026659	0.0190566	0.22158	1.76777	0.61372	0.394298	HD-ZIP	AT5G53980.1	4e-33	homeobox protein 52
CCG029216	3.5549	6.02045	6.29382	2.92251	8.47797	HD-ZIP	AT2G01430.1	9e-84	homeobox-leucine zipper protein 17
CCG013257	120.006	169.628	146.546	28.4874	45.1482	HD-ZIP	AT5G47370.1	1e-109	Homeobox-leucine zipper protein 4 (HB-4) / HD-ZIP protein
CCG005843	0.98158	3.33847	2.17318	0.23091	0.0761525	HD-ZIP	AT1G73360.1	0	homeodomain GLABROUS 11
CCG000524	21.762	24.1572	46.3945	40.0347	68.6898	HSF	AT4G36990.1	5e-85	heat shock factor 4
CCG002301	45.5625	39.7608	41.3703	28.1797	16.8157	HSF	AT2G26150.1	1e-111	heat shock transcription factor A2
CCG024284	0.212797	1.15907	1.69534	1.10826	0.35303	HSF	AT2G26150.1	6e-81	heat shock transcription factor A2
CCG008832	3.12521	3.88264	6.33744	1.48383	1.74686	HSF	AT5G03720.1	9e-99	heat shock transcription factor A3
CCG016729	21.9824	39.2476	35.4906	36.3322	66.3426	HSF	AT4G18880.1	1e-120	heat shock transcription factor A4A
CCG005035	4.7806	4.63324	5.54348	1.55731	1.45932	HSF	AT3G22830.1	1e-112	heat shock transcription factor A6B
CCG005036	2.19976	4.31321	6.31086	1.42235	1.84876	HSF	AT3G22830.1	1e-128	heat shock transcription factor A6B
CCG005528	99.0448	59.1083	82.9866	65.5029	23.143	HSF	AT3G22830.1	1e-127	heat shock transcription factor A6B
CCG025431	11.6747	25.0465	17.1377	14.8325	19.3473	HSF	AT1G67970.1	1e-95	heat shock transcription factor A8
CCG012093	30.4778	36.6946	44.8746	38.6608	64.3763	HSF	AT5G62020.1	9e-90	heat shock transcription factor B2A
CCG022839	5.54267	20.455	48.9385	29.8596	60.3037	HSF	AT5G62020.1	4e-34	heat shock transcription factor B2A
CCG028533	29.6332	70.0428	465.079	878.057	452.753	HSF	AT2G41690.1	1e-65	heat shock transcription factor B3
CCG010157	9.67239	7.3955	0.468853	0.215321	1.24427	HSF	AT1G46264.1	1e-118	heat shock transcription factor B4
CCG023098	37.5425	55.9774	2.63863	0.188855	3.87534	HSF	AT1G46264.1	2e-80	heat shock transcription factor B4
CCG016305	11.5487	81.85	20.5306	4.39881	4.31638	HSF	AT3G24520.1	8e-92	heat shock transcription factor C1
CCG003382	3.45086	16.3328	24.4774	52.2934	74.4093	HSF	AT5G45710.1	7e-80	HSF family protein
CCG010506	20.4531	20.4562	29.5781	38.6333	33.325	HSF	AT4G13980.1	1e-176	HSF family protein
CCG015488	10.0394	20.5894	63.3983	71.8782	36.8435	HSF	AT4G11660.1	1e-106	HSF family protein
CCG027797	15.2571	24.2809	30.9469	17.8765	31.9221	LBD	AT2G42430.1	5e-74	lateral organ boundaries-domain 16
CCG027796	5.55409	15.3733	3.15697	1.08645	4.20176	LBD	AT3G58190.1	3e-69	lateral organ boundaries-domain 29
CCG008534	7.9345	14.1407	2.87496	0.624762	4.33751	LBD	AT2G30130.1	4e-79	LBD family protein
CCG011467	5.33289	7.97901	32.7414	66.5513	73.3931	LBD	AT1G07900.1	7e-54	LOB domain-containing protein 1
CCG016082	2.6259	3.0085	43.7029	81.2982	33.5811	LBD	AT1G07900.1	2e-45	LOB domain-containing protein 1
CCG019711	0.513122	0.237942	1.022	0.84081	3.8099	LBD	AT1G07900.1	3e-71	LOB domain-containing protein 1
CCG020902	1.29935	0.76735	0.337071	0.218714	0.158716	LBD	AT3G11090.1	2e-60	LOB domain-containing protein 21
CCG015039	1.92453	2.19407	13.8228	43.3779	6.1084	LBD	AT4G00210.1	1e-61	LOB domain-containing protein 31
CCG010944	43.211	56.0599	93.1373	78.1452	46.9285	LBD	AT5G67420.1	9e-86	LOB domain-containing protein 37
CCG010224	4.47239	3.73594	25.5501	17.9238	9.80363	LBD	AT3G49940.1	7e-63	LOB domain-containing protein 38
CCG027477	3.74289	2.53786	5.79542	9.90989	2.5371	LBD	AT3G49940.1	4e-54	LOB domain-containing protein 38
CCG012083	3.26954	4.59744	10.6492	3.2115	2.0065	LBD	AT1G31320.1	8e-77	LOB domain-containing protein 4
CCG012863	3.45713	4.75624	1.05956	0.307594	1.48463	LBD	AT1G31320.1	1e-70	LOB domain-containing protein 4
CCG024929	304.514	82.4939	84.202	327.728	139.907	LBD	AT3G02550.1	1e-108	LOB domain-containing protein 41
CCG028290	183.526	68.79	42.0672	178.84	44.7398	LBD	AT3G02550.1	7e-80	LOB domain-containing protein 41
CCG000235	109.06	102.113	54.1184	8.71531	12.7398	MIKC_MADS	AT1G71692.1	9e-75	AGAMOUS-like 12
CCG022357	8.54883	8.06528	14.9279	15.1784	5.4514	MIKC_MADS	AT3G57230.1	4e-81	AGAMOUS-like 16
CCG007223	1.8972	2.60613	2.92781	6.11659	4.77593	MIKC_MADS	AT5G60910.1	2e-88	AGAMOUS-like 8
CCG013666	0.190338	0.163029	0.984283	0.362683	0.188399	MIKC_MADS	AT5G65060.1	1e-37	MIKC_MADS family protein
CCG023502	53.7726	44.9066	63.0716	94.2414	80.9102	MIKC_MADS	AT5G15800.1	3e-37	MIKC_MADS family protein
CCG022358	13.4291	12.687	13.8219	17.1818	5.398	M-type_MADS	AT3G57230.2	2e-42	AGAMOUS-like 16
CCG007049	0.195336	0.689539	1.26241	0.388606	0.243884	M-type_MADS	AT2G22630.1	3e-28	AGAMOUS-like 17
CCG005684	5.45229	4.59285	2.33001	3.35355	3.14541	M-type_MADS	AT2G03060.2	1e-118	AGAMOUS-like 30
CCG011363	9.99825	6.10865	9.93166	15.6922	10.5082	M-type_MADS	AT1G18750.1	9e-97	AGAMOUS-like 65
CCG024261	2.23802	0.301359	0.28068	0.0160903	0.224146	M-type_MADS	AT5G48670.1	1e-59	AGAMOUS-like 80
CCG023499	26.816	22.8853	45.679	49.5499	34.4577	M-type_MADS	AT2G03710.3	3e-20	MIKC_MADS family protein
CCG002874	6.13892	5.59519	1.86314	1.25589	4.58428	M-type_MADS	AT5G55690.1	2e-22	M-type_MADS family protein
CCG013728	5.23277	5.15599	0.64606	0.104672	0.946797	MYB	AT1G35515.1	2e-55	high response to osmotic stress 10 MYB8
CCG021824	10.0628	10.1598	3.82576	0.985601	2.20068	MYB	AT4G32730.1	2e-76	Homeodomain-like protein
CCG026711	18.4971	17.9335	7.87813	3.59719	16.4313	MYB	AT4G32730.2	0	Homeodomain-like protein
CCG008071	7.17662	7.68264	3.2565	1.2483	0.235244	MYB	AT1G63910.1	1e-102	myb domain protein 103
CCG024452	0.709607	0.243864	0.0739307	0	0.0454837	MYB	AT2G47460.1	1e-76	myb domain protein 12
CCG016610	1.56848	196.616	82.3666	4.63588	1.53275	MYB	AT3G30210.1	4e-69	myb domain protein 121
CCG016611	1.43865	11.0456	21.6761	2.02355	0.660724	MYB	AT3G30210.1	1e-72	myb domain protein 121
CCG014621	0.131476	21.7036	1.07354	1.39351	2.03719	MYB	AT2G31180.1	1e-60	myb domain protein 14
CCG010704	1.0686	1.80746	3.37331	10.4132	4.80077	MYB	AT3G23250.1	2e-54	myb domain protein 15
CCG022748	49.5267	117.496	132.915	155.741	110.402	MYB	AT3G23250.1	4e-81	myb domain protein 15
CCG028516	1.4451	3.2446	5.61212	2.03084	7.5247	MYB	AT3G23250.1	3e-70	myb domain protein 15
CCG003975	0.179913	0.882437	1.7013	0.461203	1.56433	MYB	AT3G61250.1	1e-128	myb domain protein 17
CCG019253	132.23	59.3847	9.77453	4.24097	0.325035	MYB	AT5G52260.1	3e-62	myb domain protein 19
CCG011536	2.92998	19.2336	54.9398	110.177	149.034	MYB	AT2G47190.1	2e-84	myb domain protein 2
CCG005163	3.95376	8.96896	9.02819	13.3483	14.8327	MYB	AT1G66230.1	1e-103	myb domain protein 20
CCG004697	9.72067	7.10944	1.34338	1.08364	5.24097	MYB	AT5G40330.1	1e-55	myb domain protein 23
CCG028911	12.0086	8.20714	16.7101	24.0262	11.5408	MYB	AT1G22640.1	9e-59	myb domain protein 3
CCG012200	36.6535	64.337	117.168	144.896	55.7204	MYB	AT5G57620.1	2e-77	myb domain protein 36
CCG029145	11.5061	4.35116	2.75666	2.2582	3.42428	MYB	AT5G57620.1	9e-81	myb domain protein 36
CCG022234	17.9808	19.6111	26.2841	24.6134	35.2925	MYB	AT5G02320.2	1e-165	myb domain protein 3r-5
CCG002834	164.281	71.8192	96.5531	133.154	104.842	MYB	AT4G38620.1	5e-79	myb domain protein 4
CCG007400	3.31106	1.06013	0.466981	0.904753	4.2139	MYB	AT4G38620.1	7e-75	myb domain protein 4
CCG007401	19.6601	4.92954	2.01671	1.40039	9.64179	MYB	AT4G38620.1	3e-77	myb domain protein 4
CCG026338	78.6861	94.0146	33.2411	24.5645	50.1384	MYB	AT4G38620.1	3e-63	myb domain protein 4
CCG026603	19.7596	23.3775	6.53398	5.58314	9.33463	MYB	AT4G38620.1	1e-111	myb domain protein 4
CCG024148	14.3133	6.64803	23.9137	14.2102	8.18542	MYB	AT5G14340.1	5e-82	myb domain protein 40
CCG002675	8.65991	6.1941	12.899	13.6172	2.20334	MYB	AT4G12350.1	2e-96	myb domain protein 42
CCG028999	4.91724	5.29536	2.74565	1.23656	0.0288414	MYB	AT5G12870.1	3e-82	myb domain protein 46
CCG012589	137.32	30.2992	9.22852	67.744	57.6784	MYB	AT3G46130.1	8e-93	myb domain protein 48
CCG007389	9.54657	10.3879	17.5537	12.557	12.1686	MYB	AT3G18100.1	0	myb domain protein 4r1
CCG012661	17.3416	18.4706	40.0588	48.1875	56.3455	MYB	AT3G13540.1	1e-85	myb domain protein 5
CCG028917	19.9156	13.8962	1.14774	0.363705	2.22074	MYB	AT3G13540.1	3e-54	myb domain protein 5
CCG028223	27.7749	24.6982	36.8135	16.4319	54.5951	MYB	AT5G17800.1	4e-74	myb domain protein 56
CCG003217	53.3983	91.4953	117.57	211.3	198.684	MYB	AT4G09460.1	1e-100	myb domain protein 6
CCG014314	20.5375	8.44927	25.2553	32.6317	12.65	MYB	AT4G09460.1	4e-80	myb domain protein 6
CCG011090	10.3175	2.84244	0.584738	0.115786	0.0162565	MYB	AT1G09540.1	1e-105	myb domain protein 61
CCG017506	0.211721	0.518849	1.63838	1.67495	2.92743	MYB	AT1G68320.1	1e-84	myb domain protein 62
CCG028301	5.46416	16.0156	70.9076	116.702	118.023	MYB	AT1G68320.1	2e-78	myb domain protein 62
CCG024276	9.76188	10.6814	10.7391	9.22112	19.6346	MYB	AT3G11440.1	1e-127	myb domain protein 65
CCG009794	5.42492	2.39145	1.28819	1.09881	1.43944	MYB	AT5G14750.1	2e-72	myb domain protein 66
CCG013271	2.14661	1.05049	0.557672	0.230241	0.231671	MYB	AT5G14750.1	5e-52	myb domain protein 66
CCG017976	9.79711	10.4264	5.05597	0.595216	2.83165	MYB	AT5G14750.1	5e-65	myb domain protein 66
CCG021447	2.21023	1.60247	0.91689	0.402646	0.106779	MYB	AT3G12720.1	3e-86	myb domain protein 67
CCG001779	0.777138	1.42233	3.56816	2.8278	2.69268	MYB	AT4G37260.1	1e-72	myb domain protein 73
CCG001790	0.803741	1.83024	4.29785	3.50994	3.52538	MYB	AT4G37260.1	1e-72	myb domain protein 73
CCG020280	66.4044	34.0928	116.244	96.1992	70.6747	MYB	AT4G37260.1	1e-100	myb domain protein 73
CCG002353	18.5015	40.7489	25.0841	24.3688	14.7026	MYB	AT3G50060.1	3e-58	myb domain protein 77
CCG027975	2.64636	43.4857	107.493	12.7535	2.23142	MYB	AT4G13480.1	1e-86	myb domain protein 79
CCG023961	3.70129	2.34469	0.45329	0.20196	0.706509	MYB	AT5G52600.1	3e-65	myb domain protein 82
CCG008448	1.82185	1.49894	0.871278	0.16122	0.0602936	MYB	AT3G08500.1	8e-79	myb domain protein 83
CCG016450	12.0141	18.4385	20.8539	17.1981	37.9843	MYB	AT3G49690.1	1e-89	myb domain protein 84
CCG017387	8.23866	8.37697	21.93	29.7601	18.3454	MYB	AT3G49690.1	2e-70	myb domain protein 84
CCG021684	65.5148	26.585	20.2575	17.9854	6.45147	MYB	AT4G22680.1	2e-91	myb domain protein 85
CCG007963	11.0416	13.4208	7.82532	4.25221	4.9339	MYB	AT2G02820.2	0	myb domain protein 88
CCG004090	0.234612	0.306038	1.27046	1.62777	4.80916	MYB	AT5G16770.2	1e-81	myb domain protein 9
CCG004092	1.50127	2.76945	6.57701	4.77295	6.77117	MYB	AT5G16770.2	2e-93	myb domain protein 9
CCG004093	0.427098	3.13668	2.78163	1.36116	5.62471	MYB	AT5G16770.2	3e-87	myb domain protein 9
CCG018983	2.17886	1.90529	4.51599	3.39641	5.18539	MYB	AT5G16770.2	1e-110	myb domain protein 9
CCG027532	13.0979	11.5382	17.2477	26.1414	26.8345	MYB	AT1G34670.1	1e-118	myb domain protein 93
CCG019293	0.827275	0.583642	1.03017	0.237979	0.130885	MYB	AT4G26930.1	5e-73	myb domain protein 97
CCG004694	14.9872	8.03901	1.37814	0.988481	8.42991	MYB	AT5G35550.1	1e-63	MYB family protein
CCG006939	17.6719	6.85999	10.6656	8.3223	5.63419	MYB	AT2G38090.1	4e-96	MYB family protein
CCG014771	8.05379	8.70907	18.5245	27.7902	24.5774	MYB	AT2G36890.1	7e-69	MYB family protein
CCG015247	0.305366	0.223747	0.17186	0.012407	0	MYB	AT3G28470.1	5e-76	MYB family protein
CCG024420	28.3132	162.888	263.866	291.034	147.551	MYB	AT5G04760.1	1e-61	MYB family protein
CCG026337	2.98711	3.25395	0.182071	0.149352	1.83995	MYB	AT5G35550.1	3e-61	MYB family protein
CCG026339	62.3115	73.4673	23.8892	9.03687	33.6995	MYB	AT5G35550.1	2e-60	MYB family protein
CCG028264	6.62419	4.19913	1.68597	3.91541	3.24365	MYB	AT1G49010.1	7e-95	MYB family protein
CCG028734	35.0376	16.1238	46.6071	64.2149	17.4337	MYB	AT5G08520.1	1e-123	MYB family protein
CCG004693	21.3653	27.3427	6.93962	10.1627	28.7431	MYB	AT5G35550.1	2e-63	MYB family protein 123
CCG001107	4.08137	7.8063	5.50201	6.24668	15.8609	MYB	AT4G21440.1	1e-104	MYB-like 102
CCG011910	0.777362	9.78387	9.71401	5.52695	2.8945	MYB	AT4G21440.1	1e-127	MYB-like 102
CCG014609	0	0.207334	0.178574	0.00855017	0.122872	MYB	AT4G21440.1	1e-111	MYB-like 102
CCG014620	0.105602	7.65009	0.505681	0.334422	0.171066	MYB	AT4G21440.1	2e-56	MYB-like 102
CCG018315	43.1639	28.0731	38.3768	185.273	244.278	MYB_related	AT2G46830.1	1e-109	circadian clock associated 1
CCG012793	0.447745	2.22174	8.42235	6.10529	8.27769	MYB_related	AT5G56110.1	9e-83	myb domain protein 103
CCG023718	5.3499	25.3208	174.965	183.737	155.447	MYB_related	AT3G06490.1	4e-27	myb domain protein 108
CCG004346	0.951658	5.32426	3.63046	2.8585	1.4399	MYB_related	AT5G57620.1	2e-65	myb domain protein 36
CCG009881	65.6942	37.4012	16.8705	6.76573	5.2352	MYB_related	AT1G57560.1	9e-46	myb domain protein 50
CCG003853	4.1925	6.76976	9.00029	14.156	15.8304	MYB_related	AT1G16490.1	1e-40	myb domain protein 58
CCG013730	63.6306	32.7582	16.6887	2.47694	1.40614	MYB_related	AT2G16720.1	4e-39	myb domain protein 7
CCG001575	6.48285	3.45543	1.51891	2.34445	4.16229	MYB_related	AT1G01380.1	1e-14	MYB_related family protein
CCG005841	2.77479	7.05566	4.52831	12.0709	24.0377	MYB_related	AT5G17300.1	6e-69	MYB_related family protein
CCG006490	1.48563	7.24251	8.03483	17.6443	19.0874	MYB_related	AT1G18330.1	8e-54	MYB_related family protein
CCG010827	0.227236	3.56367	0.560676	0.236464	1.35066	MYB_related	AT5G61620.1	4e-44	MYB_related family protein
CCG012711	9.76964	3.16537	8.78824	6.18198	2.75336	MYB_related	AT5G56840.1	2e-64	MYB_related family protein
CCG014696	54.1417	31.4613	18.689	14.8566	34.7181	MYB_related	AT2G46410.1	3e-18	MYB_related family protein
CCG015237	203.349	191.818	293.909	450.454	224.554	MYB_related	AT1G74840.1	2e-60	MYB_related family protein
CCG016670	17.6247	119.178	324.323	386.04	108.895	MYB_related	AT3G16350.1	2e-67	MYB_related family protein
CCG017904	44.6298	16.9008	21.8093	34.0822	31.7089	MYB_related	AT1G70000.2	3e-81	MYB_related family protein
CCG019730	12.0705	7.72248	4.27901	7.57205	12.6293	MYB_related	AT5G67580.1	9e-13	MYB_related family protein
CCG020343	21.6682	21.554	26.0468	38.3654	62.0947	MYB_related	AT3G09600.1	1e-124	MYB_related family protein
CCG027210	19.3765	22.0951	36.1197	47.054	35.7409	MYB_related	AT1G09710.1	5e-84	MYB_related family protein
CCG027831	13.387	6.09033	25.4537	47.6974	22.4346	MYB_related	AT1G01380.1	4e-18	MYB_related family protein
CCG029033	19.5448	20.6105	47.2482	52.2064	26.7612	MYB_related	AT5G52660.2	1e-108	MYB_related family protein
CCG017326	5.62579	2.57586	0.241598	0.0810852	0.607743	MYB_related	AT1G75250.2	2e-39	RAD-like 6
CCG024630	85.8106	38.6652	19.2291	0.0989983	1.98679	MYB_related	AT1G75250.1	3e-35	RAD-like 6
CCG019678	21.9306	31.2016	30.8153	41.074	74.9497	MYB_related	AT1G07540.1	1e-167	TRF-like 2
CCG001511	7.91198	6.55228	4.17628	2.61372	3.76973	MYB_related	AT1G72650.2	1e-25	TRF-like 6
CCG009192	2.83299	3.45176	2.57931	1.66547	0.989156	NAC	AT1G12260.1	1e-158	NAC 007
CCG024195	4.60149	3.46459	2.26256	0.840511	0.929665	NAC	AT1G12260.1	1e-136	NAC 007
CCG013312	52.8043	64.0053	97.594	98.8341	79.4146	NAC	AT1G33060.1	1e-123	NAC 014
CCG007885	19.0278	7.40883	28.2178	30.8472	17.8806	NAC	AT5G61430.1	1e-126	NAC domain containing protein 100
CCG011367	172.902	51.0789	83.5177	89.7257	105.871	NAC	AT5G61430.1	4e-29	NAC domain containing protein 100
CCG002547	127.815	195.288	232.601	231.895	249.325	NAC	AT1G34190.1	1e-142	NAC domain containing protein 17
CCG004176	5.82685	7.14266	2.22352	2.27867	2.9728	NAC	AT3G15510.1	4e-15	NAC domain containing protein 2
CCG015097	5.80987	5.75389	10.4338	9.65563	8.08238	NAC	AT5G04410.1	3e-32	NAC domain containing protein 2
CCG015098	93.1784	103.309	131.818	116.782	198.332	NAC	AT5G04410.1	1e-153	NAC domain containing protein 2
CCG028973	0.742533	1.05108	2.42792	1.63254	1.53353	NAC	AT5G04410.1	1e-16	NAC domain containing protein 2
CCG015294	1.34581	1.94153	0.8085	0.191435	0.343843	NAC	AT1G54330.1	1e-112	NAC domain containing protein 20
CCG000331	3.25178	2.00034	5.58643	7.42758	1.47511	NAC	AT1G61110.1	5e-83	NAC domain containing protein 25
CCG022581	9.32349	7.33329	24.0911	15.7588	6.27382	NAC	AT1G61110.1	1e-121	NAC domain containing protein 25
CCG005830	6.43107	6.55731	7.73655	2.47449	1.08559	NAC	AT1G65910.1	1e-170	NAC domain containing protein 28
CCG012505	7.03377	27.1313	37.2431	25.6224	24.0546	NAC	AT1G77450.1	3e-21	NAC domain containing protein 32
CCG013709	9.92454	8.44339	23.313	17.4372	8.67	NAC	AT1G77450.1	4e-15	NAC domain containing protein 32
CCG023473	300.382	440.985	287.891	208.742	55.2964	NAC	AT2G33480.2	1e-48	NAC domain containing protein 41
CCG005058	0.0522125	1.68966	0.961734	0.92028	2.13983	NAC	AT2G43000.1	1e-100	NAC domain containing protein 42
CCG007240	1.11135	1.22347	2.29009	10.7531	32.8566	NAC	AT2G43000.1	2e-82	NAC domain containing protein 42
CCG006104	150.983	173.584	177.596	275.723	313.489	NAC	AT3G04060.1	1e-12	NAC domain containing protein 46
CCG006102	4.98741	8.93065	21.537	34.4165	71.2671	NAC	AT3G04070.2	1e-107	NAC domain containing protein 47
CCG010166	13.8176	19.8492	18.5889	13.419	28.8286	NAC	AT3G04070.2	1e-09	NAC domain containing protein 47
CCG020402	9.34341	5.02557	3.19031	3.1525	2.0433	NAC	AT3G49530.1	6e-40	NAC domain containing protein 62
CCG000329	7.01955	4.60283	4.18296	3.24124	2.21621	NAC	AT4G10350.1	1e-160	NAC domain containing protein 70
CCG003547	1.99643	6.41949	2.38039	3.55398	30.9064	NAC	AT4G17980.1	1e-113	NAC domain containing protein 71
CCG020523	7.07404	5.20195	3.25937	1.23229	0.549248	NAC	AT4G28500.1	1e-115	NAC domain containing protein 73
CCG015930	27.8918	3.34942	3.42801	0.530876	0.161431	NAC	AT4G28530.1	1e-94	NAC domain containing protein 74
CCG009444	0.0594984	0.2287	0.805638	1.28627	1.13743	NAC	AT5G13180.1	8e-19	NAC domain containing protein 83
CCG006070	1.83212	8.97489	5.66195	3.39543	10.1325	NAC	AT5G22380.1	3e-93	NAC domain containing protein 90
CCG018538	0.392958	28.1142	7.33073	4.18052	3.95393	NAC	AT5G22380.1	2e-09	NAC domain containing protein 90
CCG001859	1.53694	0.546963	0.049369	0.00527235	0.170848	NAC	AT5G53950.1	1e-111	NAC family protein
CCG003077	15.3022	102.79	186.937	151.081	154.883	NAC	AT1G01720.1	1e-122	NAC family protein
CCG005640	6.12334	4.58759	3.23295	1.05165	2.20284	NAC	AT1G26870.1	3e-90	NAC family protein
CCG007578	36.5124	88.3982	132.663	103.247	67.9007	NAC	AT3G12977.1	2e-10	NAC family protein
CCG010814	1.93327	1.01494	0.21618	0.107685	0.540692	NAC	AT1G76420.1	1e-105	NAC family protein
CCG012860	1.37338	20.1783	6.00118	13.9869	26.4688	NAC	AT3G12910.1	8e-84	NAC family protein
CCG013343	12.1381	10.4929	4.03551	3.89614	0.308019	NAC	AT2G46770.1	1e-115	NAC family protein
CCG014948	14.3826	130.705	181.711	291.617	363.895	NAC	AT4G27410.2	1e-128	NAC family protein
CCG018343	0.546801	0.288628	0.0595643	0	0	NAC	AT2G46770.1	1e-123	NAC family protein
CCG028838	27.8206	113.571	161.885	200.551	143.801	NAC	AT1G01720.1	1e-100	NAC family protein
CCG020398	10.5378	20.8539	8.31923	7.90195	10.6542	NAC	AT4G35580.1	1e-43	NAC transcription factor-like 9
CCG005697	36.9349	85.8575	335.943	533.728	410.765	NAC	AT1G69490.1	1e-111	NAC-like, activated by AP3/PI
CCG020397	31.2242	36.2815	33.6464	49.7329	33.5768	NAC	AT5G24590.2	5e-92	TCV-interacting protein
CCG020400	5.12809	4.26734	2.05995	1.9199	2.4651	NAC	AT5G24590.2	1e-38	TCV-interacting protein
CCG005245	21.3027	22.1514	16.2	7.99202	4.23318	NAC	AT2G18060.1	1e-152	vascular related NAC-domain protein 1
CCG017311	4.54675	6.24425	5.42313	8.00169	7.45953	NAC	AT1G71930.1	1e-116	vascular related NAC-domain protein 7
CCG004029	1.494	3.66705	31.6901	28.3909	27.0716	NAC	AT5G64530.1	6e-84	xylem NAC domain 1
CCG004745	0.846238	0.557549	0.106218	0	0.0762867	NAC	AT5G64530.1	7e-49	xylem NAC domain 1
CCG017729	17.9008	17.45	36.5795	46.6062	50.7337	NF-X1	AT1G10170.1	0	NF-X-like 1
CCG000943	2.4091	2.88156	8.92514	6.11275	2.31863	NF-YA	AT5G12840.2	1e-45	nuclear factor Y, subunit A1
CCG011153	17.2419	15.677	6.44914	7.50072	10.5553	NF-YA	AT5G06510.2	1e-59	nuclear factor Y, subunit A10
CCG004679	16.1161	11.4496	26.0946	43.0425	18.5336	NF-YA	AT1G72830.1	3e-72	nuclear factor Y, subunit A3
CCG009755	20.5167	12.3425	5.20399	7.93198	7.46766	NF-YA	AT1G72830.1	1e-42	nuclear factor Y, subunit A3
CCG001903	1.1943	2.61564	1.09831	0.158284	0.089278	NF-YB	AT1G21970.1	2e-77	NF-YB family protein
CCG005959	27.1483	22.7004	13.319	29.0555	51.7513	NF-YB	AT2G27470.1	9e-44	nuclear factor Y, subunit B11
CCG025855	22.1253	19.7805	6.551	8.3048	9.6971	NF-YB	AT4G14540.1	5e-78	nuclear factor Y, subunit B3
CCG027598	4.33452	2.00244	1.62458	0.75602	0.382058	NF-YB	AT4G14540.1	2e-74	nuclear factor Y, subunit B3
CCG012755	21.2365	11.706	6.91659	4.15872	12.295	NF-YB	AT2G47810.1	2e-63	nuclear factor Y, subunit B5
CCG027664	26.7455	15.0317	8.39592	7.96891	4.19748	NF-YB	AT2G47810.1	8e-57	nuclear factor Y, subunit B5
CCG015515	9.23314	3.33333	20.8328	13.2763	10.5191	NF-YC	AT3G48590.1	9e-32	nuclear factor Y, subunit C1
CCG019496	2.27845	15.7464	19.9296	16.7131	30.4417	NF-YC	AT3G12480.1	1e-53	nuclear factor Y, subunit C11
CCG006432	2.69924	1.58076	0.286142	0.199638	0.242838	NF-YC	AT5G43250.1	1e-51	nuclear factor Y, subunit C13
CCG006753	34.9733	76.6747	49.4945	39.3492	75.0195	NF-YC	AT1G08970.3	8e-86	nuclear factor Y, subunit C9
CCG004309	0.382929	0.173445	0.0798053	0.0817747	0.0345022	Nin-like	AT4G35270.1	0	Nin-like family protein
CCG014385	16.2217	7.17123	8.41044	13.0452	14.9601	Nin-like	AT2G43500.1	0	Nin-like family protein
CCG006025	0.0346056	0.525684	0.203457	0.0894821	0.832638	RAV	AT1G50680.1	1e-42	RAV family protein
CCG016012	3.40406	1.03952	0.885331	2.25064	2.83907	RAV	AT1G50680.1	1e-100	RAV family protein
CCG024908	0.0212503	0.406049	1.39154	0.0239816	0	RAV	AT1G13260.1	1e-114	related to ABI3/VP1 1
CCG025843	0.960329	0.568807	0.850323	0.393684	0.208798	SAP	AT5G35770.1	1e-165	SAP family protein
CCG003604	7.24999	3.77262	1.96108	1.30527	4.47226	SBP	AT5G50670.1	3e-71	SBP family protein
CCG023496	40.9428	25.9945	15.0347	17.2964	15.4303	SBP	AT5G50670.1	2e-50	SBP family protein
CCG027419	7.99785	10.3848	16.3738	9.56927	10.7754	SBP	AT1G69170.1	2e-52	SBP family protein
CCG010782	49.1008	44.0216	55.0642	76.6686	90.5434	SBP	AT1G20980.1	0	squamosa promoter binding protein-like 14
CCG010864	20.074	11.9516	3.84676	2.64201	4.42176	SBP	AT3G57920.1	1e-30	squamosa promoter binding protein-like 15
CCG006450	29.053	17.0135	8.16994	10.0804	12.905	SBP	AT5G43270.1	1e-58	squamosa promoter binding protein-like 2
CCG006919	6.74564	4.04766	0.800296	2.09597	0.369499	SBP	AT1G53160.1	3e-43	squamosa promoter binding protein-like 4
CCG010863	30.4597	22.9892	5.85992	4.63412	7.83601	SBP	AT2G42200.1	8e-33	squamosa promoter binding protein-like 9
CCG024021	90.6219	70.0075	109.953	149.822	128.677	SBP	AT3G60030.1	0	squamosa promoter-binding protein-like 12
CCG000899	1.75803	2.92181	2.34786	0.798666	3.93483	SRS	AT5G66350.1	1e-100	Lateral root primordium (LRP) protein-related
CCG022230	1.65301	2.15193	6.42105	3.49448	1.84782	SRS	AT5G12330.1	5e-63	Lateral root primordium (LRP) protein-related
CCG001274	8.38082	8.05855	3.32794	3.31195	7.12911	SRS	AT1G75520.1	3e-93	SHI-related sequence 5
CCG029793	63.0672	95.7988	122.926	158.893	240.871	TALE	AT2G35940.1	0	BEL1-like homeodomain 1
CCG008732	11.1108	4.61166	7.28979	8.06097	10.9495	TALE	AT4G36870.2	1e-159	BEL1-like homeodomain 2
CCG001433	49.3533	21.9541	39.8639	58.7636	65.1068	TALE	AT4G34610.2	1e-150	BEL1-like homeodomain 6
CCG027307	49.3166	31.9318	27.5522	28.3962	18.1914	TALE	AT2G16400.1	1e-88	BEL1-like homeodomain 7
CCG021186	15.9585	30.2377	26.9117	25.1219	23.4789	TALE	AT5G25220.2	0	KNOTTED1-like homeobox gene 3
CCG028372	41.5895	67.949	159.781	191.992	67.2583	TALE	AT5G25220.2	1e-163	KNOTTED1-like homeobox gene 3
CCG029711	13.1959	12.4016	19.4895	28.3794	28.6072	TALE	AT1G23380.1	4e-54	KNOTTED1-like homeobox gene 6
CCG008556	0.497001	0.46754	0.116084	0	0	TALE	AT1G62360.1	1e-139	KNOX/ELK homeobox transcription factor
CCG007790	33.8556	13.4375	13.2042	21.5326	28.0015	TALE	AT5G41410.1	1e-141	TALE family protein
CCG004873	13.992	8.87432	11.7818	10.8647	5.51986	TCP	AT2G45680.1	7e-87	TCP family protein
CCG005341	26.0939	23.5797	3.3199	4.03974	4.69404	TCP	AT5G23280.1	1e-71	TCP family protein
CCG005625	14.7066	6.95831	2.64232	3.778	4.76146	TCP	AT1G69690.1	2e-64	TCP family protein
CCG012226	8.56205	27.1494	44.2462	49.2222	26.9367	TCP	AT2G37000.1	9e-47	TCP family protein
CCG012872	2.21213	2.02688	0.430228	0.0769411	0.688451	TCP	AT5G51910.2	5e-65	TCP family protein
CCG023490	33.7767	29.0038	15.7332	16.6363	14.7323	TCP	AT3G27010.1	1e-90	TCP family protein
CCG028587	6.32779	3.43658	1.82997	3.75317	3.35755	TCP	AT3G15030.2	1e-61	TCP family protein
CCG029524	9.08767	18.418	22.5758	27.2546	33.0991	TCP	AT3G27010.1	7e-74	TCP family protein
CCG026628	32.8664	15.8197	9.5702	13.9226	13.3203	TCP	AT1G53230.1	2e-98	TEOSINTE BRANCHED 1, cycloidea and PCF transcription factor 3
CCG003441	2.45456	1.59055	1.01842	0.906876	0.80969	TCP	AT5G60970.1	9e-56	TEOSINTE BRANCHED 1, cycloidea and PCF transcription factor 5
CCG008808	379.628	84.8748	199.959	465.693	141.352	Trihelix	AT3G10040.1	1e-123	sequence-specific DNA binding transcription factors
CCG012032	23.0028	18.6977	5.30459	2.54449	3.83894	Trihelix	AT3G54390.1	3e-98	sequence-specific DNA binding transcription factors
CCG024091	33.3975	39.8435	61.5207	49.4932	43.2986	Trihelix	AT3G58630.1	1e-65	sequence-specific DNA binding transcription factors
CCG005268	30.0043	23.2093	11.2337	6.21934	4.14777	Trihelix	AT5G28300.1	1e-90	Trihelix family protein
CCG007235	1.82716	2.55537	0.949569	0.0685991	0.0182193	Trihelix	AT2G35640.1	5e-86	Trihelix family protein
CCG008810	20.135	21.2357	32.8455	37.2837	17.2165	Trihelix	AT3G10030.1	0	Trihelix family protein
CCG013295	75.5854	47.7751	29.8487	26.172	20.7707	Trihelix	AT1G76890.2	1e-127	Trihelix family protein
CCG021423	8.32711	8.31874	79.7647	81.7158	61.3492	Trihelix	AT1G76880.1	5e-75	Trihelix family protein
CCG025120	44.7496	24.8306	20.5441	12.202	6.43891	Trihelix	AT1G76890.2	1e-147	Trihelix family protein
CCG025121	98.6425	58.0539	76.5542	49.5427	40.4114	Trihelix	AT1G76880.1	1e-176	Trihelix family protein
CCG027596	5.08928	5.96505	11.132	9.61502	5.63268	Trihelix	AT5G47660.1	9e-49	Trihelix family protein
CCG029284	6.10968	17.2635	9.62396	10.7059	9.31847	Trihelix	AT5G01380.1	6e-76	Trihelix family protein
CCG029571	28.3929	13.2458	15.968	23.0646	16.8588	Trihelix	AT2G33550.1	1e-113	Trihelix family protein
CCG000299	15.8123	15.9313	8.70542	5.58588	10.0413	Whirly	AT1G71260.1	3e-84	WHIRLY 2
CCG028222	0.812353	1.07504	1.9469	4.88616	7.14215	WOX	AT3G03660.1	4e-72	WUSCHEL related homeobox 11
CCG002640	46.3721	41.2239	79.6321	64.9475	50.3717	WOX	AT4G35550.1	5e-93	WUSCHEL related homeobox 13
CCG018264	12.6815	23.1379	2.82163	0.905927	1.51657	WOX	AT1G46480.1	3e-75	WUSCHEL related homeobox 4
CCG014486	0.539574	0.752803	1.19376	0.943776	3.20589	WOX	AT3G11260.1	4e-65	WUSCHEL related homeobox 5
CCG026819	96.6335	267.734	96.3084	121.357	135.463	WRKY	AT4G31550.1	1e-107	WRKY DNA-binding protein 11
CCG029103	126.437	407.283	284.304	265.222	216.75	WRKY	AT4G31550.1	1e-131	WRKY DNA-binding protein 11
CCG021170	25.6596	134.444	50.378	52.9387	63.8675	WRKY	AT4G31800.2	2e-61	WRKY DNA-binding protein 18
CCG014414	18.1465	41.2742	23.7121	39.2114	72.3932	WRKY	AT2G47260.1	2e-59	WRKY DNA-binding protein 23
CCG024493	66.0047	119.465	151.794	144.919	101.349	WRKY	AT2G47260.1	1e-66	WRKY DNA-binding protein 23
CCG014256	1.44985	1.95025	1.6761	4.68277	5.79207	WRKY	AT5G41570.1	8e-38	WRKY DNA-binding protein 24
CCG029044	7.17836	6.00518	8.24325	16.0214	7.87253	WRKY	AT5G41570.1	1e-56	WRKY DNA-binding protein 24
CCG015567	6.30004	15.5011	14.1981	16.127	7.8257	WRKY	AT5G52830.1	3e-64	WRKY DNA-binding protein 27
CCG012310	6.36049	13.0212	33.0486	63.7834	54.9584	WRKY	AT4G18170.1	2e-57	WRKY DNA-binding protein 28
CCG022037	44.844	99.6761	77.5349	154.706	135.41	WRKY	AT4G18170.1	9e-80	WRKY DNA-binding protein 28
CCG010523	30.6269	25.4848	52.8106	94.4004	77.9205	WRKY	AT2G03340.1	1e-131	WRKY DNA-binding protein 3
CCG003169	26.8063	158.215	159.039	167.532	383.204	WRKY	AT2G38470.1	1e-124	WRKY DNA-binding protein 33
CCG011999	44.7774	128.169	174.948	246.376	377.724	WRKY	AT2G38470.1	1e-115	WRKY DNA-binding protein 33
CCG002946	0.101737	0.051862	0.18136	0.379001	0.209254	WRKY	AT4G26440.1	1e-52	WRKY DNA-binding protein 34
CCG004828	21.1049	451.459	149.126	218.775	251.856	WRKY	AT1G80840.1	3e-93	WRKY DNA-binding protein 40
CCG021169	5.32393	3.58801	9.51019	9.11245	20.7025	WRKY	AT1G80840.1	2e-72	WRKY DNA-binding protein 40
CCG021171	1.01068	0.591804	1.78898	3.29896	2.87314	WRKY	AT1G80840.1	2e-46	WRKY DNA-binding protein 40
CCG026290	1.80998	3.23894	1.44408	0.241303	0.0658345	WRKY	AT5G43290.1	3e-56	WRKY DNA-binding protein 49
CCG002329	1.20451	0.86784	6.55769	5.13039	3.31601	WRKY	AT5G26170.1	1e-40	WRKY DNA-binding protein 50
CCG003290	3.14984	2.25642	6.49844	2.56754	0.950738	WRKY	AT5G64810.1	8e-50	WRKY DNA-binding protein 51
CCG020988	0.161771	4.08076	1.15164	1.62844	1.7743	WRKY	AT2G40740.1	2e-60	WRKY DNA-binding protein 55
CCG028034	4.23679	2.31255	4.39174	6.35109	8.86132	WRKY	AT1G69310.2	7e-65	WRKY DNA-binding protein 57
CCG007054	149.637	151.646	322.79	312.432	334.782	WRKY	AT1G29280.1	3e-89	WRKY DNA-binding protein 65
CCG018273	10.013	12.718	34.3387	18.9597	28.3972	WRKY	AT4G24240.1	1e-107	WRKY DNA-binding protein 7
CCG020295	112.31	206.309	184.955	205.621	234.623	WRKY	AT4G24240.1	3e-98	WRKY DNA-binding protein 7
CCG020989	50.3433	23.933	45.5792	46.6901	20.1121	WRKY	AT3G56400.1	4e-52	WRKY DNA-binding protein 70
CCG024798	13.3913	6.83989	5.37554	5.64185	3.13067	WRKY	AT3G56400.1	4e-51	WRKY DNA-binding protein 70
CCG000216	13.8964	16.1598	23.159	34.3682	17.5671	WRKY	AT5G15130.1	1e-111	WRKY DNA-binding protein 72
CCG007974	11.772	13.0992	14.0287	15.9103	23.4574	WRKY	AT5G15130.1	4e-87	WRKY DNA-binding protein 72
CCG011304	40.8873	46.0867	90.6446	131.741	192.385	WRKY	AT5G15130.1	5e-87	WRKY DNA-binding protein 72
CCG005302	0.491578	0.739625	1.20832	3.00832	1.03131	WRKY	AT5G28650.1	3e-80	WRKY DNA-binding protein 74
CCG003601	1.46646	1.25233	6.40556	13.6727	12.9365	WRKY	AT5G13080.1	2e-51	WRKY DNA-binding protein 75
CCG023495	2.50481	2.67435	29.1532	46.2753	38.2197	WRKY	AT5G13080.1	1e-50	WRKY DNA-binding protein 75
CCG029506	7.7381	74.4133	233.138	188.246	423.04	WRKY	AT5G13080.1	7e-52	WRKY DNA-binding protein 75
CCG008056	51.6548	282.6	116.596	188.65	178.718	WRKY	AT4G01250.1	7e-50	WRKY family protein 22
CCG024481	54.9169	29.3951	22.1028	34.3544	24.8418	WRKY	AT4G01250.1	2e-39	WRKY family protein 22
CCG029041	14.9444	57.3016	34.4357	51.7218	42.3597	WRKY	AT4G01250.1	2e-84	WRKY family protein 22
CCG006645	7.70332	139.457	32.1122	31.8642	71.6276	WRKY	AT4G11070.1	1e-74	WRKY family protein 41
CCG023999	65.8779	82.3649	46.7801	29.1597	23.429	WRKY	AT4G04450.1	2e-76	WRKY family protein 42
CCG025713	13.1446	96.2064	51.5679	39.6487	83.231	WRKY	AT4G04450.1	1e-138	WRKY family protein 42
CCG001376	2.39265	81.9323	24.4257	27.7147	98.0611	WRKY	AT4G23810.1	4e-59	WRKY family protein 53
CCG025231	50.6203	157.284	80.9797	79.7914	63.9837	WRKY	AT4G23810.1	1e-51	WRKY family protein 53
CCG008589	46.2576	116.983	187.867	239.907	529.656	WRKY	AT1G62300.1	1e-174	WRKY family protein 6
CCG024627	3.03948	1.81774	1.38547	0.5139	1.91101	ZF-HD	AT2G18350.1	2e-62	homeobox protein 24
CCG021662	1.7073	0.954402	0.781308	0.464128	0.169783	ZF-HD	AT3G28920.1	8e-83	homeobox protein 34
CCG021664	27.3844	25.3465	12.031	10.9673	7.83129	ZF-HD	AT3G28920.1	4e-66	homeobox protein 34
