# Supplementary material for: Transcriptome and structure analysis in root of Casuarina equisetifolia under NaCl treatment
Source: PeerJ. 2021 Sep 22;9:e12133. doi: 10.7717/peerj.12133 (PMC8464194; doi:10.7717/peerj.12133)
Supplement: Supplemental Information 9 — Ions content changed in C. equisetifolia root under salt stress and the relative expression levels of target genes from qRT-PCR results. [file peerj-09-12133-s009.xlsx]

## Sheet: Sheet1
Ions content changed in C. equisetifolia root under salt stress.
Name	K+ (g/kg)	Na+ (g/kg)	Cl -(g/kg)
CK_1	13.776	4.534	6.932
CK_2	16.36	3.479	8.783
CK_3	15.217	6.511	9.981
H1_1	13.952	20.001	24.439
H1_2	12.113	16.033	22.231
H1_3	14.789	16.214	23.577
H6_1	13.952	20.001	24.439
H6_2	12.113	16.033	22.231
H6_3	14.789	16.214	23.577
H24_1	10.206	29.91	43.966
H24_2	8.715	29.911	49.046
H24_3	11.499	32.889	51.699
H168_1	1.862	33.971	58.812
H168_2	1.527	31.664	58.157
H168_3	1.514	34.875	62.741

## Sheet: Sheet2
The relative expression levels of target genes from qRT-PCR results.
CCG016745	CK	H1	H6	H24	H168
Repeat_1	1	1.92121	0.212455	0.021723	0.05408
Repeat_2	1.01202	2.03976	0.227985	0.023292	0.060671
Repeat_3	0.988622	1.77111	0.197204	0.019438	0.051337
CCG015501	CK	H1	H6	H24	H168
Repeat_1	1	2.01433	2.45355	4.1898	4.88832
Repeat_2	1.07235	2.21808	2.74009	4.33758	5.09649
Repeat_3	0.93905	1.8293	2.31026	4.04705	4.71435
CCG010583	CK	H1	H6	H24	H168
Repeat_1	1	3.4492	11.2651	27.2526	28.7825
Repeat_2	1.03961	3.5606	11.5352	27.7829	29.6327
Repeat_3	0.961569	3.24003	10.9685	26.7269	27.9954
CCG013802	CK	H1	H6	H24	H168
Repeat_1	1	0.985624	0.817913	2.54792	227.963
Repeat_2	1.36871	1.49639	0.926588	3.08736	248.947
Repeat_3	0.637085	0.642849	0.639486	2.01555	214.982
